# Supplementary material for: Dicalcium silicate microparticles modulate the differential expression of circRNAs and mRNAs in BMSCs and promote osteogenesisviacirc_1983–miR-6931–Gas7 interaction
Source: Royal Society of Chemistry journal article supplement (doi:10.1039/d0bm00459f), 2020-01-01
Supplement: d0bm00459f1.pdf [file d0bm00459f1.pdf]

## Supplementary Figure 1

a

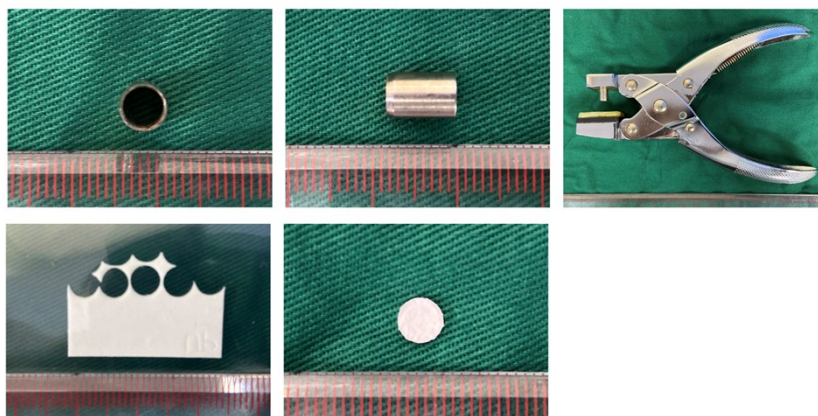

a. Procedure of 5 mm diameter Haiao® oral repair film discs preparation

b

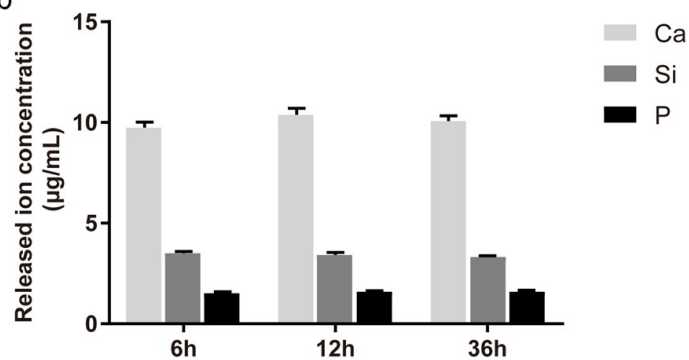

b. Ca, Si, and P release profile from  $C_2S$  microparticles

c

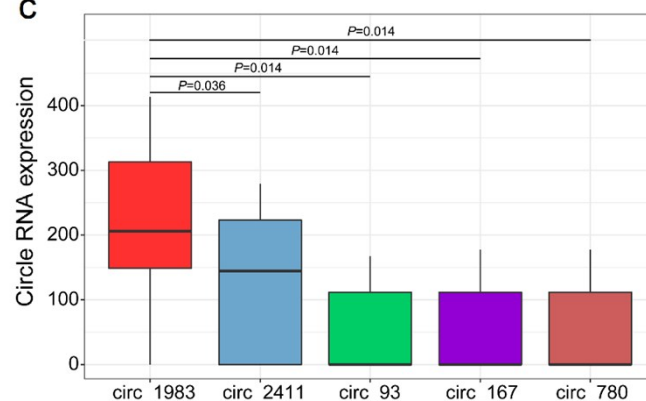

c. Expression of five circRNAs interacting with Gas7 in  $C_2S$ -treated BMSCs
