# Supplementary material for: Dicalcium silicate microparticles modulate the differential expression of circRNAs and mRNAs in BMSCs and promote osteogenesisviacirc_1983–miR-6931–Gas7 interaction
Source: Royal Society of Chemistry journal article supplement (doi:10.1039/d0bm00459f), 2020-01-01
Supplement: d0bm00459f2.xlsx [file d0bm00459f2.xlsx]

## Sheet: Sheet1
Supplementary Table 1. CircRNA identified and expressed in BMSCs.
circRNA ID1	Chr	Start	End	Strand	circRNA type2	Host gene id		C2S samples (RPKM)				OM samples (RPKM)				PM samples (RPKM)			Raw ID3
								C2S_1	C2S_2	C2S_3		OM_1	OM_2	OM_3		PM_1	PM_2	PM_3
circ_14	chr5	146751695	146754599	-	exon	ENSMUSG00000029640		429.618	-	-		-	402.254	-		-	-	-	ciri_circ_2898,find_circ_14
circ_16	chr18	69633577	69657950	+	exon	ENSMUSG00000053477		859.236	-	-		555.562	-	-		-	-	-	ciri_circ_1779,find_circ_16
circ_66	chr2	32614781	32615187	+	exon	ENSMUSG00000026811		429.618	-	-		-	-	-		-	-	477.102	ciri_circ_2025,find_circ_66
circ_103	chr2	109092936	109093297	-	exon	ENSMUSG00000057234		429.618	-	-		-	-	-		-	-	477.102	ciri_circ_11594,find_circ_103
circ_134	chr12	111592577	111604564	+	exon	ENSMUSG00000007411		429.618	-	-		-	-	-		1123.7	-	-	ciri_circ_798,find_circ_134
circ_143	chr14	120379150	120396604	+	exon	ENSMUSG00000022139		644.427	-	-		-	-	-		842.777	-	-	ciri_circ_1084,find_circ_143
circ_154	chr17	50782261	50800195	-	exon	ENSMUSG00000023923		429.618	-	454.199		-	-	-		-	-	-	ciri_circ_7978,find_circ_154
circ_164	chr11	105325502	105333731	+	exon	ENSMUSG00000020695		429.618	-	-		-	804.508	-		-	-	-	ciri_circ_7778,find_circ_164
circ_190	chr10	94043302	94045633	+	exon	ENSMUSG00000020021		429.618	643.385	-		-	-	-		-	-	-	ciri_circ_350,find_circ_190
circ_196	chr7	29350693	29354182	-	exon	ENSMUSG00000030583		429.618	-	-		-	-	-		561.851	-	-	ciri_circ_10928,find_circ_196
circ_225	chr6	31426714	31433131	+	exon	ENSMUSG00000025609		429.618	-	-		-	-	-		-	527.195	-	ciri_circ_2964,find_circ_225
circ_242	chr1	165388658	165429315	-	exon	ENSMUSG00000026571		429.618	-	-		370.374	-	-		-	-	-	ciri_circ_148,find_circ_242
circ_258	chr4	57647990	57710143	+	exon	ENSMUSG00000090053		429.618	-	-		-	-	-		-	-	715.652	ciri_circ_11631,find_circ_258
circ_261	chr2	103747979	103757793	-	exon	ENSMUSG00000027185		429.618	-	-		-	402.254	-		-	-	-	ciri_circ_2120,find_circ_261
circ_278	chr14	59349222	59381147	-	intergenic region	n/a		7088.69	-	-		-	-	4115.42		-	-	-	ciri_circ_1033,find_circ_278
circ_300	chr2	37844777	37858472	-	exon	ENSMUSG00000035392		429.618	-	-		-	-	391.945		-	-	-	ciri_circ_2037,find_circ_300
circ_313	chr15	72685283	72693657	-	exon	ENSMUSG00000047921		1074.04	-	908.397		-	-	-		-	-	-	ciri_circ_1187,find_circ_313
circ_321	chr10	49355909	49356115	-	exon	ENSMUSG00000056073		644.427	-	-		-	402.254	-		-	-	-	ciri_circ_270,find_circ_321
circ_322	chr15	64312349	64361683	-	intron	ENSMUSG00000022377		644.427	-	-		-	-	-		-	527.195	-	ciri_circ_1183,find_circ_322
circ_354	chr2	6336368	6409009	+	exon	ENSMUSG00000039046		429.618	428.923	-		-	-	-		-	-	-	ciri_circ_1962,find_circ_354
circ_373	chr6	73256171	73271122	+	exon	ENSMUSG00000052738		429.618	-	-		-	402.254	-		-	-	-	ciri_circ_3042,find_circ_373
circ_375	chr11	4646562	4649869	+	exon	ENSMUSG00000020412		429.618	-	-		370.374	-	-		-	-	-	ciri_circ_404,find_circ_375
circ_380	chr17	28400960	28416025	-	exon	ENSMUSG00000024222		644.427	-	-		-	402.254	-		-	-	-	ciri_circ_1482,find_circ_380
circ_411	chr15	44388469	44405992	-	exon	ENSMUSG00000038736		429.618	-	-		-	-	-		561.851	-	-	ciri_circ_1152,find_circ_411
circ_420	chr6	115439840	115451082	+	exon	ENSMUSG00000000440		1074.04	643.385	-		-	-	-		-	-	-	ciri_circ_3100,find_circ_420
circ_447	chr11	101124970	101160396	+	intergenic region	n/a		3222.13	-	-		1666.69	-	-		-	-	-	ciri_circ_4105,find_circ_447
circ_461	chr13	15641069	15662530	+	exon	ENSMUSG00000021318		859.236	-	-		-	-	-		561.851	-	-	ciri_circ_817,find_circ_461
circ_465	chr3	99308830	99316358	+	exon	ENSMUSG00000027868		429.618	-	-		-	-	587.917		-	-	-	ciri_circ_2399,find_circ_465
circ_470	chr19	26647021	26654511	+	exon	ENSMUSG00000024921		644.427	-	-		-	603.381	-		-	-	-	ciri_circ_1854,find_circ_470
circ_545	chr9	45972942	45976130	-	exon	ENSMUSG00000003131		644.427	-	454.199		-	-	-		-	-	-	ciri_circ_3648,find_circ_545
circ_548	chr2	70750435	70786995	-	exon	ENSMUSG00000041997		429.618	-	-		-	-	-		-	527.195	-	ciri_circ_2080,find_circ_548
circ_590	chr11	51716439	51729578	-	exon	ENSMUSG00000036391		429.618	-	-		-	402.254	-		-	-	-	ciri_circ_471,find_circ_590
circ_600	chr6	47484744	47508388	+	exon	ENSMUSG00000029686		1074.04	-	-		-	-	-		-	527.195	-	ciri_circ_2999,find_circ_600
circ_607	chr7	73397836	73398752	+	intron	ENSMUSG00000070509		429.618	643.385	-		-	-	-		-	-	-	ciri_circ_5123,find_circ_607
circ_635	chr6	98966027	99016665	-	exon	ENSMUSG00000030067		429.618	-	454.199		-	-	-		-	-	-	ciri_circ_3086,find_circ_635
circ_655	chr5	88934749	88954957	+	exon	ENSMUSG00000060961		429.618	-	-		-	-	-		842.777	-	-	ciri_circ_2761,find_circ_655
circ_676	chr7	133961084	133981590	-	exon	ENSMUSG00000054555		429.618	-	681.298		-	-	-		-	-	-	ciri_circ_3385,find_circ_676
circ_680	chr9	86422841	86448853	-	exon	ENSMUSG00000032415		429.618	428.923	-		-	-	-		-	-	-	ciri_circ_3734,find_circ_680
circ_690	chr18	82671686	82682287	-	exon	ENSMUSG00000041258		429.618	-	-		-	-	-		-	527.195	-	ciri_circ_1803,find_circ_690
circ_691	chr5	52151810	52184903	-	exon	ENSMUSG00000029169		429.618	-	-		-	-	391.945		-	-	-	ciri_circ_2741,find_circ_691
circ_692	chr13	31901849	31910712	+	intron	ENSMUSG00000038372		429.618	-	-		-	402.254	-		-	-	-	ciri_circ_833,find_circ_692
circ_712	chr2	145822265	145822761	+	exon	ENSMUSG00000001768		644.427	-	-		-	-	-		-	-	477.102	ciri_circ_2213,find_circ_712
circ_714	chr11	106117490	106123906	+	exon	ENSMUSG00000020700		429.618	-	454.199		-	-	-		-	-	-	ciri_circ_603,find_circ_714
circ_719	chr2	70742054	70786995	-	exon	ENSMUSG00000041997		429.618	428.923	-		-	-	-		-	-	-	ciri_circ_2079,find_circ_719
circ_724	chr1	80269210	80271710	-	exon	ENSMUSG00000004364		429.618	-	681.298		-	-	-		-	-	-	ciri_circ_72,find_circ_724
circ_735	chr7	49452399	49458208	+	exon	ENSMUSG00000052512		429.618	-	-		-	-	391.945		-	-	-	ciri_circ_9042,find_circ_735
circ_736	chr8	3427349	3429639	+	exon	ENSMUSG00000004568		644.427	-	-		-	-	587.917		-	-	-	ciri_circ_3399,find_circ_736
circ_750	chr11	4640383	4649869	+	exon	ENSMUSG00000020412		644.427	-	-		-	-	783.89		-	-	-	ciri_circ_403,find_circ_750
circ_804	chr1	16345704	16394210	-	exon	ENSMUSG00000025920		429.618	-	-		-	-	-		-	527.195	-	ciri_circ_10208,find_circ_804
circ_806	chr1	173912814	173977437	-	intergenic region	n/a		1288.85	-	1135.5		-	-	-		-	-	-	ciri_circ_9703,find_circ_806
circ_824	chr8	36850164	36858075	-	exon	ENSMUSG00000031523		644.427	-	-		-	-	391.945		-	-	-	ciri_circ_3437,find_circ_824
circ_828	chr15	58784873	58797245	-	exon	ENSMUSG00000062373		644.427	-	-		-	402.254	-		-	-	-	ciri_circ_1164,find_circ_828
circ_830	chr7	25326380	25331136	+	exon	ENSMUSG00000045039		644.427	-	-		555.562	-	-		-	-	-	ciri_circ_3201,find_circ_830
circ_839	chr11	57283510	57289495	+	exon	ENSMUSG00000020524		429.618	-	-		370.374	-	-		-	-	-	ciri_circ_486,find_circ_839
circ_848	chr2	18905275	18908152	-	intron	ENSMUSG00000026737		429.618	-	454.199		-	-	-		-	-	-	ciri_circ_1991,find_circ_848
circ_852	chr14	122133280	122139774	+	exon	ENSMUSG00000025544		429.618	-	908.397		-	-	-		-	-	-	ciri_circ_1092,find_circ_852
circ_856	chr9	72742653	72746479	+	exon	ENSMUSG00000032216		429.618	-	-		555.562	-	-		-	-	-	ciri_circ_3714,find_circ_856
circ_860	chr18	58671208	58673366	+	exon	ENSMUSG00000024601		644.427	-	-		370.374	-	-		-	-	-	ciri_circ_6971,find_circ_860
circ_862	chr6	146415321	146426570	-	exon	ENSMUSG00000030287		429.618	-	-		370.374	-	-		-	-	-	ciri_circ_3185,find_circ_862
circ_874	chr17	42339673	42377640	+	intron	ENSMUSG00000042256		644.427	-	908.397		-	-	-		-	-	-	ciri_circ_5812,find_circ_874
circ_893	chr2	94358751	94386181	-	exon	ENSMUSG00000027194		429.618	-	-		1111.12	-	-		-	-	-	ciri_circ_2115,find_circ_893
circ_897	chr4	152206764	152237766	+	exon	ENSMUSG00000028937		429.618	-	-		-	402.254	-		-	-	-	ciri_circ_2672,find_circ_897
circ_910	chr14	31184942	31185425	-	exon	ENSMUSG00000021910		429.618	-	454.199		-	-	-		-	-	-	ciri_circ_5689,find_circ_910
circ_924	chr1	89627761	89634294	+	exon	ENSMUSG00000055013		1074.04	-	-		-	-	783.89		-	-	-	ciri_circ_82,find_circ_924
circ_933	chr14	16290771	16294673	+	exon	ENSMUSG00000021785		429.618	-	-		-	-	587.917		-	-	-	ciri_circ_962,find_circ_933
circ_938	chr18	42519368	42538056	+	exon	ENSMUSG00000024498		644.427	-	-		-	-	-		-	527.195	-	ciri_circ_1748,find_circ_938
circ_953	chr10	40254264	40254464	-	exon	ENSMUSG00000019837		429.618	-	-		-	-	-		-	527.195	-	ciri_circ_255,find_circ_953
circ_983	chr18	5748694	5773094	+	exon	ENSMUSG00000024238		429.618	-	-		-	603.381	-		-	-	-	ciri_circ_1692,find_circ_983
circ_991	chr6	65881049	65928021	+	exon	ENSMUSG00000029913		429.618	-	-		-	-	391.945		-	-	-	ciri_circ_3030,find_circ_991
circ_1003	chr3	85730259	85741374	-	exon	ENSMUSG00000051000		644.427	-	-		-	-	-		-	527.195	-	ciri_circ_2339,find_circ_1003
circ_1046	chr9	101175328	101194425	-	exon	ENSMUSG00000043154		644.427	-	-		370.374	-	-		-	-	-	ciri_circ_3759,find_circ_1046
circ_1058	chr3	144754729	144810870	-	intergenic region	n/a		3866.56	-	4769.09		-	-	-		-	-	-	ciri_circ_2470,find_circ_1058
circ_1068	chr11	87981295	87984010	-	exon	ENSMUSG00000020483		429.618	-	-		-	804.508	-		-	-	-	ciri_circ_563,find_circ_1068
circ_1075	chr11	84467461	84473166	-	exon	ENSMUSG00000018697		429.618	-	-		370.374	-	-		-	-	-	ciri_circ_551,find_circ_1075
circ_1077	chr6	116229223	116248158	+	exon	ENSMUSG00000024104		644.427	-	-		-	-	-		561.851	-	-	ciri_circ_3107,find_circ_1077
circ_1106	chr9	96223094	96273942	+	exon	ENSMUSG00000032411		429.618	-	454.199		-	-	-		-	-	-	ciri_circ_3741,find_circ_1106
circ_1108	chr18	35581597	35582086	+	exon	ENSMUSG00000037236		429.618	-	-		370.374	-	-		-	-	-	ciri_circ_1736,find_circ_1108
circ_1109	chr7	49798306	49806626	+	exon	ENSMUSG00000030505		429.618	-	-		-	603.381	-		-	-	-	ciri_circ_3233,find_circ_1109
circ_1110	chr11	101216995	101218720	-	exon	ENSMUSG00000006920		429.618	-	-		370.374	-	-		-	-	-	ciri_circ_590,find_circ_1110
circ_1111	chr10	80545463	80546465	-	exon	ENSMUSG00000047417		644.427	-	-		555.562	-	-		-	-	-	ciri_circ_318,find_circ_1111
circ_1134	chr6	31163894	31181149	-	intron	ENSMUSG00000044471		859.236	-	-		555.562	-	-		-	-	-	ciri_circ_2953,find_circ_1134
circ_1139	chr12	104967882	104969373	-	exon	ENSMUSG00000054150		429.618	-	-		370.374	-	-		-	-	-	ciri_circ_791,find_circ_1139
circ_1147	chr8	18641565	18671254	+	exon	ENSMUSG00000039842		429.618	-	-		-	-	-		-	527.195	-	ciri_circ_3408,find_circ_1147
circ_1151	chr10	58507521	58524296	+	exon	ENSMUSG00000038010		429.618	-	-		-	-	391.945		-	-	-	ciri_circ_8533,find_circ_1151
circ_1179	chr13	119437969	119440871	+	exon	ENSMUSG00000025451		429.618	428.923	-		-	-	-		-	-	-	ciri_circ_948,find_circ_1179
circ_1183	chr2	112354174	112355144	+	exon	ENSMUSG00000027130		429.618	-	-		-	-	391.945		-	-	-	ciri_circ_8853,find_circ_1183
circ_1208	chr2	70738421	70786995	-	exon	ENSMUSG00000041997		429.618	-	-		370.374	-	-		-	-	-	ciri_circ_2078,find_circ_1208
circ_1225	chr11	97139472	97148733	-	exon	ENSMUSG00000038517		429.618	-	-		-	-	-		561.851	-	-	ciri_circ_577,find_circ_1225
circ_1242	chr4	65176209	65205152	+	exon	ENSMUSG00000028370		644.427	-	-		-	-	391.945		-	-	-	ciri_circ_2550,find_circ_1242
circ_1262	chr1	71590098	71593235	-	exon	ENSMUSG00000026193		429.618	-	-		370.374	-	-		-	-	-	ciri_circ_61,find_circ_1262
circ_1267	chr4	82350389	82383661	-	exon	ENSMUSG00000008575		429.618	-	-		-	-	391.945		-	-	-	ciri_circ_2556,find_circ_1267
circ_1273	chr15	93452117	93465245	+	exon	ENSMUSG00000036167		429.618	-	-		-	402.254	-		-	-	-	ciri_circ_1239,find_circ_1273
circ_1283	chr7	102460291	102461683	+	exon	ENSMUSG00000030978		429.618	-	-		-	-	391.945		-	-	-	ciri_circ_3302,find_circ_1283
circ_1312	chr10	76797795	76800914	-	exon	ENSMUSG00000001120		429.618	428.923	-		-	-	-		-	-	-	ciri_circ_315,find_circ_1312
circ_1335	chr10	80712112	80719812	-	exon	ENSMUSG00000020198		429.618	-	-		-	-	391.945		-	-	-	ciri_circ_5484,find_circ_1335
circ_1358	chr11	98821431	98823399	+	exon	ENSMUSG00000078676		429.618	-	-		-	-	-		-	527.195	-	ciri_circ_586,find_circ_1358
circ_1361	chr3	86120530	86121186	+	exon	ENSMUSG00000028082		644.427	-	-		-	402.254	-		-	-	-	ciri_circ_2343,find_circ_1361
circ_1370	chr13	98489510	98490968	+	intron	ENSMUSG00000092116		859.236	428.923	-		-	-	-		-	-	-	ciri_circ_925,find_circ_1370
circ_1374	chr5	35945188	35951034	+	exon	ENSMUSG00000029094		429.618	-	-		-	-	-		842.777	-	-	ciri_circ_2730,find_circ_1374
circ_1383	chr8	91101348	91102309	+	exon	ENSMUSG00000031666		859.236	-	-		555.562	-	-		-	-	-	ciri_circ_3541,find_circ_1383
circ_1392	chr18	67813872	67816860	+	exon	ENSMUSG00000024542		429.618	-	-		-	-	391.945		-	-	-	ciri_circ_1774,find_circ_1392
circ_1406	chrX	71231391	71259826	+	exon	ENSMUSG00000031337		429.618	-	-		-	-	-		561.851	-	-	ciri_circ_3829,find_circ_1406
circ_1409	chr11	4816082	4820493	-	exon	ENSMUSG00000009073		429.618	-	-		370.374	-	-		-	-	-	ciri_circ_408,find_circ_1409
circ_1422	chr16	15829616	15831338	+	exon	ENSMUSG00000022672		429.618	-	-		370.374	-	-		-	-	-	ciri_circ_6861,find_circ_1422
circ_1431	chr5	5604274	5619069	-	exon	ENSMUSG00000040473		429.618	-	-		740.749	-	-		-	-	-	ciri_circ_2680,find_circ_1431
circ_1433	chr10	50637908	50660726	+	exon	ENSMUSG00000038774		429.618	-	-		-	-	587.917		-	-	-	ciri_circ_281,find_circ_1433
circ_1434	chr4	8577955	8582493	+	exon	ENSMUSG00000047187		429.618	-	-		-	-	-		561.851	-	-	ciri_circ_4847,find_circ_1434
circ_1442	chr18	9858981	9859974	+	exon	ENSMUSG00000036103		644.427	-	-		-	-	-		561.851	-	-	ciri_circ_1702,find_circ_1442
circ_1462	chr14	87472076	87511770	+	exon	ENSMUSG00000022019		429.618	-	-		555.562	-	-		-	-	-	ciri_circ_1068,find_circ_1462
circ_1478	chr10	12697989	12699115	-	exon	ENSMUSG00000019820		644.427	-	-		-	-	-		-	527.195	-	ciri_circ_227,find_circ_1478
circ_1491	chr9	65034875	65066496	+	exon	ENSMUSG00000032393		429.618	-	-		-	-	-		-	-	715.652	ciri_circ_10175,find_circ_1491
circ_1496	chr12	91213565	91267086	-	exon	ENSMUSG00000061533		429.618	428.923	-		-	-	-		-	-	-	ciri_circ_773,find_circ_1496
circ_1502	chr18	60707601	60713632	-	intergenic region	n/a		644.427	-	681.298		-	-	-		-	-	-	ciri_circ_1763,find_circ_1502
circ_1509	chr4	150420638	150439468	+	intron	ENSMUSG00000039852		429.618	-	-		-	-	-		561.851	-	-	ciri_circ_2656,find_circ_1509
circ_1520	chr15	73330849	73343359	-	exon	ENSMUSG00000022607		429.618	-	-		-	402.254	-		-	-	-	ciri_circ_1192,find_circ_1520
circ_1553	chr3	138955322	138965996	-	exon	ENSMUSG00000028149		644.427	-	-		-	402.254	-		-	-	-	ciri_circ_2451,find_circ_1553
circ_1563	chr2	153187263	153204624	+	exon	ENSMUSG00000068040		429.618	-	-		-	-	-		-	-	715.652	ciri_circ_2225,find_circ_1563
circ_1580	chr11	104526051	104536670	-	exon	ENSMUSG00000020687		429.618	-	454.199		-	-	-		-	-	-	ciri_circ_600,find_circ_1580
circ_1587	chr14	33402624	33411024	-	exon	ENSMUSG00000021936		429.618	-	-		555.562	-	-		-	-	-	ciri_circ_990,find_circ_1587
circ_1593	chr7	132960611	132973623	+	intron	ENSMUSG00000030849;ENSMUSG00000030967		429.618	-	454.199		-	-	-		-	-	-	ciri_circ_3382,find_circ_1593
circ_1595	chr12	13558612	13566257	+	exon	ENSMUSG00000020576		429.618	-	-		-	-	-		-	527.195	-	ciri_circ_646,find_circ_1595
circ_1605	chr8	13165849	13167965	+	exon	ENSMUSG00000031447		429.618	-	-		-	-	-		561.851	-	-	ciri_circ_3406,find_circ_1605
circ_1611	chr11	72645537	72663173	+	exon	ENSMUSG00000020794		429.618	-	-		-	-	-		561.851	-	-	ciri_circ_515,find_circ_1611
circ_1634	chr11	22956153	22956692	-	exon	ENSMUSG00000051355		429.618	-	-		-	402.254	-		-	-	-	ciri_circ_430,find_circ_1634
circ_1650	chr16	4611280	4611869	+	exon	ENSMUSG00000014303		644.427	-	-		-	-	-		-	527.195	-	ciri_circ_1263,find_circ_1650
circ_1654	chr19	40393388	40402310	-	exon	ENSMUSG00000025006		429.618	-	454.199		-	-	-		-	-	-	ciri_circ_1907,find_circ_1654
circ_1671	chr7	90160448	90197020	+	exon	ENSMUSG00000039361		859.236	-	-		-	-	-		-	-	477.102	ciri_circ_3282,find_circ_1671
circ_1708	chr9	65066351	65075888	+	exon	ENSMUSG00000032393		429.618	-	-		-	-	-		-	-	477.102	ciri_circ_5295,find_circ_1708
circ_1710	chr17	28410510	28416025	-	exon	ENSMUSG00000024222		429.618	-	-		-	402.254	-		-	-	-	ciri_circ_1485,find_circ_1710
circ_1726	chr8	107338809	107355822	+	exon	ENSMUSG00000003847		644.427	-	-		370.374	-	-		-	-	-	ciri_circ_3562,find_circ_1726
circ_1741	chrX	139700999	139706181	+	exon	ENSMUSG00000042473		429.618	857.846	-		-	-	-		-	-	-	ciri_circ_3867,find_circ_1741
circ_1746	chr6	113319668	113319952	+	exon	ENSMUSG00000001632		429.618	428.923	-		-	-	-		-	-	-	ciri_circ_5074,find_circ_1746
circ_1749	chr4	84956276	85006524	+	exon	ENSMUSG00000038070		429.618	-	-		-	-	391.945		-	-	-	ciri_circ_2568,find_circ_1749
circ_1750	chr2	60779731	60842472	-	exon	ENSMUSG00000026970		429.618	-	-		-	-	391.945		-	-	-	ciri_circ_2064,find_circ_1750
circ_1755	chr19	4787361	4804015	-	intron	ENSMUSG00000096370		1074.04	-	681.298		-	-	-		-	-	-	ciri_circ_1818,find_circ_1755
circ_1756	chr2	120806759	120837260	-	exon	ENSMUSG00000090100		429.618	-	454.199		-	-	-		-	-	-	ciri_circ_2167,find_circ_1756
circ_1760	chr14	14820778	14828541	+	exon	ENSMUSG00000042567		429.618	-	681.298		-	-	-		-	-	-	ciri_circ_957,find_circ_1760
circ_1777	chr14	79058673	79065005	+	exon	ENSMUSG00000058997		429.618	-	-		-	-	-		-	-	715.652	ciri_circ_11488,find_circ_1777
circ_1782	chr19	17328772	17333256	-	exon	ENSMUSG00000038843		429.618	-	-		-	402.254	-		-	-	-	ciri_circ_8036,find_circ_1782
circ_1788	chr2	70770004	70786995	-	exon	ENSMUSG00000041997		429.618	-	908.397		-	-	-		-	-	-	ciri_circ_2083,find_circ_1788
circ_1791	chr11	20703711	20709746	-	exon	ENSMUSG00000049659		429.618	-	-		-	-	391.945		-	-	-	ciri_circ_419,find_circ_1791
circ_1818	chr3	27222668	27226142	+	exon	ENSMUSG00000027698		644.427	-	-		-	-	391.945		-	-	-	ciri_circ_2284,find_circ_1818
circ_1828	chr19	5801227	5801816	-	exon	ENSMUSG00000092341		644.427	-	-		-	-	587.917		-	-	-	ciri_circ_1823,find_circ_1828
circ_1851	chr8	107369398	107371253	+	exon	ENSMUSG00000003847		429.618	428.923	-		-	-	-		-	-	-	ciri_circ_5238,find_circ_1851
circ_1882	chr10	50617712	50618271	+	exon	ENSMUSG00000038774		644.427	643.385	-		-	-	-		-	-	-	ciri_circ_280,find_circ_1882
circ_1889	chr8	79663725	79664111	+	exon	ENSMUSG00000036990		429.618	-	-		-	-	-		561.851	-	-	ciri_circ_3520,find_circ_1889
circ_1890	chr10	30590025	30591102	-	exon	ENSMUSG00000019792		429.618	-	-		-	-	-		-	527.195	-	ciri_circ_246,find_circ_1890
circ_1912	chr6	30858738	30863610	-	exon	ENSMUSG00000025607		429.618	-	-		-	-	391.945		-	-	-	ciri_circ_2946,find_circ_1912
circ_1920	chr13	77996433	78006472	+	intron	ENSMUSG00000064138		429.618	-	-		370.374	-	-		-	-	-	ciri_circ_6726,find_circ_1920
circ_1926	chr5	107118419	107142546	-	exon	ENSMUSG00000029287		429.618	-	-		-	-	391.945		-	-	-	ciri_circ_2807,find_circ_1926
circ_1928	chr1	36854844	36889325	-	exon	ENSMUSG00000026116		429.618	-	-		-	402.254	-		-	-	-	ciri_circ_29,find_circ_1928
circ_1930	chr6	144430528	144434490	-	intron	ENSMUSG00000041540		859.236	-	-		-	-	783.89		-	-	-	ciri_circ_3178,find_circ_1930
circ_1938	chr8	69291262	69303851	+	intron	ENSMUSG00000079038		429.618	-	-		-	-	391.945		-	-	-	ciri_circ_9086,find_circ_1938
circ_1943	chr19	36862086	36866123	+	exon	ENSMUSG00000024811		644.427	-	-		-	-	-		-	790.793	-	ciri_circ_1889,find_circ_1943
circ_1955	chr6	72128264	72149177	+	exon	ENSMUSG00000056091		859.236	-	-		-	402.254	-		-	-	-	ciri_circ_3037,find_circ_1955
circ_1984	chr6	31413792	31428225	+	intron	ENSMUSG00000025609		429.618	-	-		-	-	-		-	-	477.102	ciri_circ_7351,find_circ_1984
circ_1999	chr12	28862955	28867153	+	exon	ENSMUSG00000036613		429.618	-	-		-	-	-		561.851	-	-	ciri_circ_651,find_circ_1999
circ_2033	chr3	88155678	88156525	+	exon	ENSMUSG00000001419		644.427	-	-		-	-	-		561.851	-	-	ciri_circ_2349,find_circ_2033
circ_2038	chr10	100076735	100089271	+	exon	ENSMUSG00000019966		429.618	857.846	-		-	-	-		-	-	-	ciri_circ_357,find_circ_2038
circ_2046	chr10	7738723	7743736	+	exon	ENSMUSG00000019794		429.618	-	-		-	-	-		-	527.195	-	ciri_circ_213,find_circ_2046
circ_2075	chr18	82986744	82994537	+	exon	ENSMUSG00000058881		644.427	-	-		-	-	-		842.777	-	-	ciri_circ_1806,find_circ_2075
circ_2114	chr10	120176231	120182708	-	exon	ENSMUSG00000020227		429.618	-	-		-	402.254	-		-	-	-	ciri_circ_376,find_circ_2114
circ_2134	chr4	40939077	40943707	-	exon	ENSMUSG00000028416		429.618	-	-		370.374	-	-		-	-	-	ciri_circ_2519,find_circ_2134
circ_2157	chr14	66303181	66304235	+	exon	ENSMUSG00000022043		429.618	-	-		-	-	-		-	527.195	-	ciri_circ_1048,find_circ_2157
circ_2172	chr7	109911915	109927014	-	exon	ENSMUSG00000035901		429.618	643.385	-		-	-	-		-	-	-	ciri_circ_3315,find_circ_2172
circ_2183	chr1	140425193	140450304	+	exon	ENSMUSG00000052726		1288.85	-	-		740.749	-	-		-	-	-	ciri_circ_126,find_circ_2183
circ_2187	chr12	100466180	100495440	-	exon	ENSMUSG00000033530		429.618	-	-		-	-	-		-	-	715.652	ciri_circ_777,find_circ_2187
circ_2207	chr9	106183616	106184296	+	exon	ENSMUSG00000020257		429.618	-	-		-	-	-		561.851	-	-	ciri_circ_3760,find_circ_2207
circ_2227	chr3	152446799	152458562	+	exon	ENSMUSG00000039068		429.618	-	-		-	-	-		561.851	-	-	ciri_circ_6048,find_circ_2227
circ_2245	chr1	5124277	5150061	+	exon	ENSMUSG00000033793		429.618	-	-		-	402.254	-		-	-	-	ciri_circ_7,find_circ_2245
circ_2247	chr7	101342498	101344034	+	exon	ENSMUSG00000030688		644.427	-	-		-	603.381	-		-	-	-	ciri_circ_3301,find_circ_2247
circ_2248	chr4	53127597	53133015	-	exon	ENSMUSG00000015243		429.618	-	-		-	402.254	-		-	-	-	ciri_circ_2534,find_circ_2248
circ_2254	chr4	116286056	116286999	+	exon	ENSMUSG00000111410		429.618	-	-		-	-	-		561.851	-	-	ciri_circ_2603,find_circ_2254
circ_2263	chr2	156503645	156506503	+	exon	ENSMUSG00000027624		429.618	-	-		-	-	-		561.851	-	-	ciri_circ_2236,find_circ_2263
circ_2271	chr1	165422856	165429315	-	exon	ENSMUSG00000026571		429.618	428.923	-		-	-	-		-	-	-	ciri_circ_151,find_circ_2271
circ_2279	chr8	109876803	109895641	+	exon	ENSMUSG00000031732		429.618	-	-		555.562	-	-		-	-	-	ciri_circ_3569,find_circ_2279
circ_2291	chr7	122113250	122123708	-	exon	ENSMUSG00000044702		429.618	428.923	-		-	-	-		-	-	-	ciri_circ_3354,find_circ_2291
circ_2297	chr8	27150695	27156669	-	exon	ENSMUSG00000031488		429.618	-	-		-	-	391.945		-	-	-	ciri_circ_3430,find_circ_2297
circ_2299	chr5	122600440	122607057	-	exon	ENSMUSG00000029469		859.236	-	-		-	-	-		-	-	477.102	ciri_circ_2854,find_circ_2299
circ_2320	chr11	70874746	70908517	+	exon	ENSMUSG00000020817		644.427	-	681.298		-	-	-		-	-	-	ciri_circ_511,find_circ_2320
circ_2323	chr4	84539886	84546405	-	intron	ENSMUSG00000028487		429.618	-	-		-	-	391.945		-	-	-	ciri_circ_2565,find_circ_2323
circ_2324	chr18	63779869	63796281	+	exon	ENSMUSG00000040560		429.618	-	-		-	-	-		-	527.195	-	ciri_circ_1768,find_circ_2324
circ_2333	chr15	27897834	27905331	-	exon	ENSMUSG00000022263		429.618	-	-		-	-	-		-	527.195	-	ciri_circ_1129,find_circ_2333
circ_2345	chr3	69730405	69731655	+	exon	ENSMUSG00000027787		429.618	-	-		-	402.254	-		-	-	-	ciri_circ_2327,find_circ_2345
circ_2350	chr11	95299979	95303309	-	exon	ENSMUSG00000038909		429.618	-	-		-	603.381	-		-	-	-	ciri_circ_7772,find_circ_2350
circ_2354	chr11	86331883	86346028	-	exon	ENSMUSG00000034297		429.618	428.923	-		-	-	-		-	-	-	ciri_circ_558,find_circ_2354
circ_2377	chr6	72843035	72861925	-	exon	ENSMUSG00000055239		429.618	-	-		-	-	391.945		-	-	-	ciri_circ_9008,find_circ_2377
circ_2397	chr6	29361560	29361753	+	exon	ENSMUSG00000029767		644.427	-	-		-	-	-		-	527.195	-	ciri_circ_2940,find_circ_2397
circ_2407	chr12	82357233	82403179	+	exon	ENSMUSG00000042700		429.618	-	-		-	-	-		561.851	-	-	ciri_circ_759,find_circ_2407
circ_2410	chr2	37580673	37647285	-	exon	ENSMUSG00000026915		644.427	-	-		-	-	391.945		-	-	-	ciri_circ_2034,find_circ_2410
circ_2416	chr11	53399589	53402566	+	exon	ENSMUSG00000049470		429.618	-	-		-	-	-		-	1054.39	-	ciri_circ_477,find_circ_2416
circ_2417	chr17	36030822	36109732	-	intergenic region	n/a		1288.85	-	-		-	-	587.917		-	-	-	ciri_circ_1557,find_circ_2417
circ_2423	chr8	73098830	73132132	-	exon	ENSMUSG00000004383		429.618	-	-		370.374	-	-		-	-	-	ciri_circ_3476,find_circ_2423
circ_2431	chr7	87287173	87297539	+	exon	ENSMUSG00000030562		429.618	-	-		-	-	587.917		-	-	-	ciri_circ_3271,find_circ_2431
circ_2436	chr11	97248202	97267679	-	exon	ENSMUSG00000001441		429.618	-	-		-	-	-		561.851	-	-	ciri_circ_583,find_circ_2436
circ_2446	chr18	67545615	67552807	-	exon	ENSMUSG00000024533		429.618	-	-		-	-	391.945		-	-	-	ciri_circ_1773,find_circ_2446
circ_2451	chr2	13169998	13241795	-	exon	ENSMUSG00000026727		429.618	-	-		-	-	-		-	-	477.102	ciri_circ_1974,find_circ_2451
circ_2467	chr7	98610667	98641668	-	exon	ENSMUSG00000035401		429.618	-	-		-	-	-		561.851	-	-	ciri_circ_3293,find_circ_2467
circ_2475	chr2	5228916	5234326	+	intergenic region	n/a		429.618	-	-		740.749	-	-		-	-	-	ciri_circ_1953,find_circ_2475
circ_2483	chr7	87360728	87376282	+	exon	ENSMUSG00000030562		644.427	-	-		370.374	-	-		-	-	-	ciri_circ_3275,find_circ_2483
circ_2485	chr3	88207186	88209716	+	exon	ENSMUSG00000097156		429.618	-	-		370.374	-	-		-	-	-	ciri_circ_7159,find_circ_2485
circ_2487	chr12	44282578	44311595	+	exon	ENSMUSG00000036257		429.618	-	-		-	-	-		-	790.793	-	ciri_circ_5586,find_circ_2487
circ_2488	chr16	65827894	65839733	+	exon	ENSMUSG00000091243		429.618	-	-		-	603.381	-		-	-	-	ciri_circ_1320,find_circ_2488
circ_2490	chr11	20238466	20242238	-	exon	ENSMUSG00000044066		429.618	-	-		370.374	-	-		-	-	-	ciri_circ_6590,find_circ_2490
circ_2494	chr9	86372341	86448853	-	exon	ENSMUSG00000032415		429.618	-	-		-	-	391.945		-	-	-	ciri_circ_3731,find_circ_2494
circ_2507	chr18	31827262	31829979	+	exon	ENSMUSG00000024400		644.427	-	454.199		-	-	-		-	-	-	ciri_circ_1727,find_circ_2507
circ_2518	chr17	75327197	75364509	+	exon	ENSMUSG00000001870		644.427	-	-		555.562	-	-		-	-	-	ciri_circ_1649,find_circ_2518
circ_2527	chr5	122567261	122611107	-	exon	ENSMUSG00000029469		429.618	-	-		-	-	-		842.777	-	-	ciri_circ_2851,find_circ_2527
circ_2546	chr3	24413350	24433210	-	exon	ENSMUSG00000102758		859.236	-	-		-	-	-		-	-	477.102	ciri_circ_2281,find_circ_2546
circ_2551	chr5	134522586	134523142	-	exon	ENSMUSG00000063146		429.618	643.385	-		-	-	-		-	-	-	ciri_circ_4991,find_circ_2551
circ_2556	chr12	75493414	75515798	-	exon	ENSMUSG00000021051		429.618	-	-		-	-	-		-	-	477.102	ciri_circ_748,find_circ_2556
circ_2559	chr7	92932972	92998091	+	intergenic region	n/a		644.427	-	454.199		-	-	-		-	-	-	ciri_circ_8347,find_circ_2559
circ_2568	chr9	108480756	108481422	+	exon	ENSMUSG00000052911		429.618	-	-		370.374	-	-		-	-	-	ciri_circ_7582,find_circ_2568
circ_2628	chr2	119701118	119705643	+	exon	ENSMUSG00000027304		644.427	-	-		-	402.254	-		-	-	-	ciri_circ_2158,find_circ_2628
circ_2639	chr3	152221267	152222244	+	exon	ENSMUSG00000028034		429.618	-	-		-	402.254	-		-	-	-	ciri_circ_2480,find_circ_2639
circ_2666	chr2	157101721	157116507	-	exon	ENSMUSG00000027639		429.618	-	-		-	-	391.945		-	-	-	ciri_circ_2243,find_circ_2666
circ_2676	chr9	110182922	110197790	+	exon	ENSMUSG00000032481		429.618	-	-		-	-	-		-	-	715.652	ciri_circ_9652,find_circ_2676
circ_2678	chr14	120503601	120504114	+	exon	ENSMUSG00000051615		429.618	-	-		-	-	-		-	527.195	-	ciri_circ_1085,find_circ_2678
circ_2727	chr5	34410581	34410823	+	exon	ENSMUSG00000037210		429.618	-	-		-	-	-		-	-	715.652	ciri_circ_11654,find_circ_2727
circ_2730	chr12	51762424	51764154	-	exon	ENSMUSG00000035247		429.618	643.385	-		-	-	-		-	-	-	ciri_circ_4146,find_circ_2730
circ_2732	chr13	119381676	119396976	-	exon	ENSMUSG00000025453		429.618	-	-		-	804.508	-		-	-	-	ciri_circ_7857,find_circ_2732
circ_2733	chr9	63093427	63093625	+	intergenic region	n/a		429.618	-	-		-	-	587.917		-	-	-	ciri_circ_3676,find_circ_2733
circ_2735	chr19	36411956	36445077	+	exon	ENSMUSG00000024805		429.618	-	-		-	-	391.945		-	-	-	ciri_circ_1887,find_circ_2735
circ_2736	chr6	98954321	99010057	-	exon	ENSMUSG00000030067		429.618	428.923	-		-	-	-		-	-	-	ciri_circ_3085,find_circ_2736
circ_2768	chr16	10960917	10966649	-	exon	ENSMUSG00000022500		429.618	-	-		-	402.254	-		-	-	-	ciri_circ_7927,find_circ_2768
circ_2773	chr4	48382105	48385272	+	exon	ENSMUSG00000028344		429.618	-	-		-	-	391.945		-	-	-	ciri_circ_8923,find_circ_2773
circ_2774	chr4	114580291	114603015	+	exon	ENSMUSG00000070867		429.618	-	-		-	-	-		561.851	-	-	ciri_circ_10880,find_circ_2774
circ_2784	chr3	86114787	86121186	+	exon	ENSMUSG00000028082		1074.04	-	1135.5		-	-	-		-	-	-	ciri_circ_2342,find_circ_2784
circ_2786	chr8	120658029	120660860	-	exon	ENSMUSG00000031819		429.618	-	681.298		-	-	-		-	-	-	ciri_circ_6348,find_circ_2786
circ_2790	chr11	61886700	61900446	-	exon	ENSMUSG00000047804		429.618	-	-		370.374	-	-		-	-	-	ciri_circ_495,find_circ_2790
circ_2829	chr6	119920110	119921019	+	exon	ENSMUSG00000030166		429.618	-	-		-	402.254	-		-	-	-	ciri_circ_3126,find_circ_2829
circ_2869	chrX	152046660	152047968	+	exon	ENSMUSG00000041133		429.618	-	-		-	402.254	-		-	-	-	ciri_circ_3887,find_circ_2869
circ_2878	chr15	72736776	72757358	-	exon	ENSMUSG00000047921		429.618	-	-		555.562	-	-		-	-	-	ciri_circ_6835,find_circ_2878
circ_2891	chrX	151565372	151573516	+	exon	ENSMUSG00000041229		429.618	-	-		370.374	-	-		-	-	-	ciri_circ_3885,find_circ_2891
circ_2893	chr3	95784214	95787384	-	exon	ENSMUSG00000028106		-	428.923	454.199		-	-	-		-	-	-	ciri_circ_4815,find_circ_2893
circ_2898	chr2	54854602	54880172	+	exon	ENSMUSG00000060988		-	643.385	-		-	402.254	-		-	-	-	ciri_circ_4686,find_circ_2898
circ_2918	chr2	179932016	179939954	-	exon	ENSMUSG00000039117		-	428.923	-		740.749	-	-		-	-	-	ciri_circ_4777,find_circ_2918
circ_2925	chr7	127473595	127473986	+	exon	ENSMUSG00000030822		-	428.923	-		-	-	-		-	-	477.102	ciri_circ_11714,find_circ_2925
circ_2927	chr6	92887341	92894386	-	exon	ENSMUSG00000030022		-	643.385	-		740.749	-	-		-	-	-	ciri_circ_5062,find_circ_2927
circ_2929	chr19	44947930	44960875	+	exon	ENSMUSG00000036097		-	428.923	-		370.374	-	-		-	-	-	ciri_circ_4630,find_circ_2929
circ_2930	chr1	140507700	140553071	+	exon	ENSMUSG00000052726		-	643.385	-		-	-	391.945		-	-	-	ciri_circ_3953,find_circ_2930
circ_2935	chr17	6106392	6139156	+	intergenic region	n/a		-	428.923	-		740.749	-	-		-	-	-	ciri_circ_4431,find_circ_2935
circ_2939	chr18	11084315	11085532	+	exon	ENSMUSG00000005836		-	643.385	-		1296.31	-	-		-	-	-	ciri_circ_4538,find_circ_2939
circ_2950	chr14	34237416	34249371	-	exon	ENSMUSG00000041471		-	428.923	-		-	402.254	-		-	-	-	ciri_circ_4283,find_circ_2950
circ_2952	chr1	39997021	40000749	+	exon	ENSMUSG00000026074		-	643.385	-		-	-	391.945		-	-	-	ciri_circ_3919,find_circ_2952
circ_2966	chr12	51774651	51776630	-	exon	ENSMUSG00000035247		-	428.923	-		-	-	391.945		-	-	-	ciri_circ_4147,find_circ_2966
circ_2969	chr13	45795509	45852456	-	exon	ENSMUSG00000046876		-	857.846	-		555.562	-	-		-	-	-	ciri_circ_4220,find_circ_2969
circ_2972	chr14	122684882	122714125	+	exon	ENSMUSG00000041650		-	428.923	-		-	402.254	-		-	-	-	ciri_circ_1093,find_circ_2972
circ_2974	chrX	164391602	164394581	+	exon	ENSMUSG00000031380		-	428.923	-		-	-	587.917		-	-	-	ciri_circ_5380,find_circ_2974
circ_2981	chrX	113110176	113116430	-	exon	ENSMUSG00000025531		-	857.846	-		-	-	-		-	-	477.102	ciri_circ_11766,find_circ_2981
circ_2994	chr14	122582617	122616885	+	exon	ENSMUSG00000041650		-	428.923	-		-	-	-		-	-	715.652	ciri_circ_11496,find_circ_2994
circ_3014	chr10	49355909	49404450	-	exon	ENSMUSG00000056073		-	643.385	454.199		-	-	-		-	-	-	ciri_circ_3993,find_circ_3014
circ_3015	chr5	92192713	92194175	+	exon	ENSMUSG00000029407		-	428.923	-		-	-	-		-	-	477.102	ciri_circ_4949,find_circ_3015
circ_3021	chr5	32819866	32844564	-	exon	ENSMUSG00000054280		-	428.923	681.298		-	-	-		-	-	-	ciri_circ_6126,find_circ_3021
circ_3035	chr17	8182228	8186581	+	exon	ENSMUSG00000069135		-	428.923	-		1111.12	-	-		-	-	-	ciri_circ_4435,find_circ_3035
circ_3037	chr2	77168511	77170607	-	exon	ENSMUSG00000044033		-	428.923	1362.6		-	-	-		-	-	-	ciri_circ_4702,find_circ_3037
circ_3045	chr10	28263501	28354779	+	exon	ENSMUSG00000019889		-	857.846	-		-	1407.89	-		-	-	-	ciri_circ_3983,find_circ_3045
circ_3046	chrX	151376748	151405755	+	intron	ENSMUSG00000025262		-	857.846	-		-	804.508	-		-	-	-	ciri_circ_5377,find_circ_3046
circ_3048	chr11	90671084	90674819	-	exon	ENSMUSG00000020541		-	428.923	-		370.374	-	-		-	-	-	ciri_circ_4097,find_circ_3048
circ_3061	chr10	39742691	39814090	+	exon	ENSMUSG00000019841		-	857.846	-		-	603.381	-		-	-	-	ciri_circ_3987,find_circ_3061
circ_3065	chr17	86098512	86139249	-	exon	ENSMUSG00000024135		-	428.923	681.298		-	-	-		-	-	-	ciri_circ_4528,find_circ_3065
circ_3071	chrX	105874560	105899993	-	exon	ENSMUSG00000031229		-	428.923	-		-	-	-		561.851	-	-	ciri_circ_10982,find_circ_3071
circ_3073	chr1	5089009	5117487	+	exon	ENSMUSG00000033793		-	428.923	454.199		-	-	-		-	-	-	ciri_circ_5,find_circ_3073
circ_3075	chr15	99802111	99807743	-	exon	ENSMUSG00000023022		-	428.923	-		-	-	-		-	527.195	-	ciri_circ_4378,find_circ_3075
circ_3080	chr11	87041788	87045874	-	exon	ENSMUSG00000061666		-	428.923	-		-	-	391.945		-	-	-	ciri_circ_4090,find_circ_3080
circ_3084	chr14	21240463	21318183	+	exon	ENSMUSG00000039197		-	428.923	-		-	-	-		-	-	477.102	ciri_circ_968,find_circ_3084
circ_3097	chr16	90866255	90876191	+	exon	ENSMUSG00000039903		-	428.923	-		370.374	-	-		-	-	-	ciri_circ_4420,find_circ_3097
circ_3102	chr17	63907281	63924178	+	exon	ENSMUSG00000000127		-	428.923	-		-	-	-		842.777	-	-	ciri_circ_10772,find_circ_3102
circ_3109	chr5	111346483	111349574	+	exon	ENSMUSG00000050017		-	428.923	-		-	-	391.945		-	-	-	ciri_circ_4970,find_circ_3109
circ_3115	chr4	48451926	48452981	-	exon	ENSMUSG00000028345		-	643.385	-		-	1005.64	-		-	-	-	ciri_circ_4858,find_circ_3115
circ_3123	chr2	164096739	164100596	+	exon	ENSMUSG00000018209		-	643.385	-		-	-	391.945		-	-	-	ciri_circ_4769,find_circ_3123
circ_3138	chr3	144746764	144803099	-	intergenic region	n/a		-	2144.62	-		-	-	1567.78		-	-	-	ciri_circ_2464,find_circ_3138
circ_3150	chr8	119565644	119566474	-	exon	ENSMUSG00000034189		-	643.385	-		370.374	-	-		-	-	-	ciri_circ_5243,find_circ_3150
circ_3156	chr9	77957141	77961053	+	exon	ENSMUSG00000032349		-	643.385	454.199		-	-	-		-	-	-	ciri_circ_3719,find_circ_3156
circ_3158	chr13	94394719	94418143	+	exon	ENSMUSG00000021686		-	428.923	-		-	-	-		-	527.195	-	ciri_circ_4254,find_circ_3158
circ_3159	chr6	122828157	122828503	+	exon	ENSMUSG00000003154		-	428.923	-		-	-	391.945		-	-	-	ciri_circ_5086,find_circ_3159
circ_3180	chr3	68616440	68621066	+	exon	ENSMUSG00000102422		-	643.385	-		555.562	-	-		-	-	-	ciri_circ_4795,find_circ_3180
circ_3181	chrX	51128921	51139368	-	exon	ENSMUSG00000036109		-	428.923	681.298		-	-	-		-	-	-	ciri_circ_6421,find_circ_3181
circ_3190	chr3	144193896	144194503	-	exon	ENSMUSG00000028266		-	428.923	-		555.562	-	-		-	-	-	ciri_circ_4835,find_circ_3190
circ_3195	chr14	16270475	16283473	+	exon	ENSMUSG00000021785		-	643.385	-		-	-	-		561.851	-	-	ciri_circ_4266,find_circ_3195
circ_3196	chr10	28354679	28383724	+	exon	ENSMUSG00000019889		-	428.923	454.199		-	-	-		-	-	-	ciri_circ_3984,find_circ_3196
circ_3199	chr7	46801672	46808879	+	exon	ENSMUSG00000006599		-	643.385	-		-	-	-		561.851	-	-	ciri_circ_3229,find_circ_3199
circ_3200	chr6	124542198	124636166	-	intergenic region	n/a		-	1286.77	1589.7		-	-	-		-	-	-	ciri_circ_3150,find_circ_3200
circ_3203	chr5	28331111	28352643	+	exon	ENSMUSG00000048271		-	428.923	-		-	-	-		-	527.195	-	ciri_circ_4928,find_circ_3203
circ_3210	chr6	134066307	134073055	+	intron	ENSMUSG00000030199		-	643.385	-		-	-	-		-	790.793	-	ciri_circ_11293,find_circ_3210
circ_3223	chr12	55057242	55063109	-	exon	ENSMUSG00000062198		-	428.923	-		-	-	-		-	527.195	-	ciri_circ_4150,find_circ_3223
circ_3224	chr7	34365615	34371184	-	exon	ENSMUSG00000066568		-	643.385	-		370.374	-	-		-	-	-	ciri_circ_5108,find_circ_3224
circ_3225	chr1	63093285	63105759	-	exon	ENSMUSG00000040865		-	428.923	-		555.562	-	-		-	-	-	ciri_circ_3929,find_circ_3225
circ_3228	chr6	100611736	100655371	-	exon	ENSMUSG00000035378		-	428.923	-		-	1005.64	-		-	-	-	ciri_circ_5068,find_circ_3228
circ_3232	chr5	45722974	45747307	-	exon	ENSMUSG00000015882		-	428.923	-		740.749	-	-		-	-	-	ciri_circ_4934,find_circ_3232
circ_3233	chr17	78400630	78404844	-	exon	ENSMUSG00000056121		-	428.923	-		370.374	-	-		-	-	-	ciri_circ_4517,find_circ_3233
circ_3237	chr15	35617598	35652366	+	exon	ENSMUSG00000037646		-	428.923	-		-	-	-		-	-	477.102	ciri_circ_4345,find_circ_3237
circ_3252	chr18	39126833	39150118	+	exon	ENSMUSG00000036452		-	428.923	-		370.374	-	-		-	-	-	ciri_circ_1744,find_circ_3252
circ_3259	chr11	62146306	62156640	+	exon	ENSMUSG00000042331		-	428.923	-		-	-	-		-	-	477.102	ciri_circ_9217,find_circ_3259
circ_3265	chr15	8365792	8374102	-	exon	ENSMUSG00000022141		-	643.385	-		-	402.254	-		-	-	-	ciri_circ_4338,find_circ_3265
circ_3269	chr3	94856043	94860971	+	exon	ENSMUSG00000038902		-	428.923	-		-	-	-		561.851	-	-	ciri_circ_4812,find_circ_3269
circ_3279	chr7	142016079	142016505	-	exon	ENSMUSG00000025147		-	643.385	-		-	402.254	-		-	-	-	ciri_circ_5175,find_circ_3279
circ_3287	chr9	75504840	75507524	-	exon	ENSMUSG00000058587		-	428.923	-		370.374	-	-		-	-	-	ciri_circ_7565,find_circ_3287
circ_3291	chr10	28569897	28575706	+	exon	ENSMUSG00000019889		-	428.923	-		-	603.381	-		-	-	-	ciri_circ_3985,find_circ_3291
circ_3293	chr9	96576286	96611499	-	exon	ENSMUSG00000032413		-	428.923	-		-	-	-		561.851	-	-	ciri_circ_5318,find_circ_3293
circ_3299	chr16	50220445	50225293	-	exon	ENSMUSG00000022641		-	428.923	-		-	-	391.945		-	-	-	ciri_circ_4413,find_circ_3299
circ_3303	chr17	80038592	80053641	-	exon	ENSMUSG00000024095		-	428.923	-		-	-	-		-	-	477.102	ciri_circ_4520,find_circ_3303
circ_3313	chr6	112771367	112773699	-	exon	ENSMUSG00000030257		-	643.385	-		-	-	-		-	-	477.102	ciri_circ_5073,find_circ_3313
circ_3317	chr14	16277799	16294673	+	exon	ENSMUSG00000021785		-	428.923	-		-	-	391.945		-	-	-	ciri_circ_8653,find_circ_3317
circ_3326	chr5	117323500	117344013	+	exon	ENSMUSG00000066894		-	428.923	-		370.374	-	-		-	-	-	ciri_circ_4972,find_circ_3326
circ_3330	chr18	67675720	67677862	-	exon	ENSMUSG00000024539		-	428.923	454.199		-	-	-		-	-	-	ciri_circ_5862,find_circ_3330
circ_3339	chr18	80844527	80891923	-	exon	ENSMUSG00000024566		-	428.923	454.199		-	-	-		-	-	-	ciri_circ_4583,find_circ_3339
circ_3340	chr13	55040545	55093281	-	exon	ENSMUSG00000025878		-	428.923	-		-	402.254	-		-	-	-	ciri_circ_4225,find_circ_3340
circ_3341	chr2	31604614	31605343	+	exon	ENSMUSG00000026843		-	643.385	-		-	402.254	-		-	-	-	ciri_circ_2020,find_circ_3341
circ_3350	chr2	91055905	91057060	+	exon	ENSMUSG00000002102		-	428.923	908.397		-	-	-		-	-	-	ciri_circ_4710,find_circ_3350
circ_3351	chr2	157788992	157790795	+	exon	ENSMUSG00000027649		-	643.385	-		-	-	391.945		-	-	-	ciri_circ_4763,find_circ_3351
circ_3353	chr17	26739543	26759949	+	exon	ENSMUSG00000048249		-	428.923	-		-	-	-		561.851	-	-	ciri_circ_4464,find_circ_3353
circ_3359	chr16	16037490	16048104	-	exon	ENSMUSG00000041974		-	643.385	-		-	-	-		561.851	-	-	ciri_circ_4392,find_circ_3359
circ_3360	chr19	34812221	34827373	-	exon	ENSMUSG00000033610		-	428.923	-		-	-	-		-	527.195	-	ciri_circ_10404,find_circ_3360
circ_3361	chr11	78335427	78336830	+	exon	ENSMUSG00000041958		-	428.923	-		-	-	391.945		-	-	-	ciri_circ_4078,find_circ_3361
circ_3372	chr7	73490479	73519708	-	exon	ENSMUSG00000078671		-	428.923	-		-	402.254	-		-	-	-	ciri_circ_5126,find_circ_3372
circ_3380	chr2	91885601	91886978	+	exon	ENSMUSG00000040506		-	428.923	-		-	804.508	-		-	-	-	ciri_circ_8094,find_circ_3380
circ_3385	chr11	106380667	106382546	-	exon	ENSMUSG00000001029		-	428.923	454.199		-	-	-		-	-	-	ciri_circ_4113,find_circ_3385
circ_3386	chr5	150728894	150736419	+	exon	ENSMUSG00000034021		-	428.923	-		-	402.254	-		-	-	-	ciri_circ_8274,find_circ_3386
circ_3395	chr6	83928653	83935010	+	exon	ENSMUSG00000030016		-	428.923	-		-	-	391.945		-	-	-	ciri_circ_5051,find_circ_3395
circ_3404	chr2	71056495	71063495	+	exon	ENSMUSG00000041966		-	643.385	-		-	-	-		842.777	-	-	ciri_circ_4696,find_circ_3404
circ_3405	chr19	40311669	40337035	-	exon	ENSMUSG00000025006		-	428.923	-		-	-	587.917		-	-	-	ciri_circ_1900,find_circ_3405
circ_3409	chr8	117411261	117436919	+	exon	ENSMUSG00000034390		-	428.923	-		-	-	391.945		-	-	-	ciri_circ_9104,find_circ_3409
circ_3412	chr6	127468032	127474311	+	exon	ENSMUSG00000037997		-	428.923	454.199		-	-	-		-	-	-	ciri_circ_10110,find_circ_3412
circ_3417	chr15	102538183	102547872	-	exon	ENSMUSG00000052414		-	428.923	-		-	402.254	-		-	-	-	ciri_circ_4384,find_circ_3417
circ_3433	chr4	139433620	139435184	+	exon	ENSMUSG00000066036		-	428.923	681.298		-	-	-		-	-	-	ciri_circ_2638,find_circ_3433
circ_3440	chr8	85875634	85901957	+	exon	ENSMUSG00000036879		-	643.385	-		-	402.254	-		-	-	-	ciri_circ_3532,find_circ_3440
circ_3449	chr5	105224274	105277942	-	intron	ENSMUSG00000079362		-	3645.85	3860.69		-	-	-		-	-	-	ciri_circ_2794,find_circ_3449
circ_3450	chr17	36041868	36120432	-	intergenic region	n/a		-	7506.16	7721.38		-	-	-		-	-	-	ciri_circ_4483,find_circ_3450
circ_3456	chr11	65706984	65756371	-	exon	ENSMUSG00000033352		-	428.923	-		-	402.254	-		-	-	-	ciri_circ_10261,find_circ_3456
circ_3457	chr5	73520116	73534697	+	exon	ENSMUSG00000051674		-	428.923	-		-	-	391.945		-	-	-	ciri_circ_4942,find_circ_3457
circ_3466	chr6	113517097	113520581	-	exon	ENSMUSG00000030286		-	643.385	-		-	-	-		-	527.195	-	ciri_circ_5075,find_circ_3466
circ_3470	chr9	72718218	72721661	+	exon	ENSMUSG00000032216		-	428.923	-		-	402.254	-		-	-	-	ciri_circ_8432,find_circ_3470
circ_3487	chr19	55908423	55912645	+	exon	ENSMUSG00000024985		-	428.923	-		-	402.254	-		-	-	-	ciri_circ_4636,find_circ_3487
circ_3491	chr14	46914486	46935186	+	intron	ENSMUSG00000021838		-	428.923	-		-	-	391.945		-	-	-	ciri_circ_4288,find_circ_3491
circ_3502	chr17	84222674	84231164	-	exon	ENSMUSG00000024251		-	643.385	454.199		-	-	-		-	-	-	ciri_circ_4524,find_circ_3502
circ_3503	chr3	86093690	86104347	+	exon	ENSMUSG00000028082		-	428.923	-		-	-	391.945		-	-	-	ciri_circ_4799,find_circ_3503
circ_3504	chr2	91572348	91573067	+	exon	ENSMUSG00000040549		-	428.923	-		-	-	-		-	527.195	-	ciri_circ_4712,find_circ_3504
circ_3506	chr14	33408048	33411024	-	exon	ENSMUSG00000021936		-	428.923	-		-	-	-		-	-	954.203	ciri_circ_9816,find_circ_3506
circ_3509	chr5	54102575	54111110	+	exon	ENSMUSG00000039156		-	857.846	-		-	-	587.917		-	-	-	ciri_circ_4935,find_circ_3509
circ_3510	chr17	35688539	35690180	-	exon	ENSMUSG00000003534		-	428.923	-		370.374	-	-		-	-	-	ciri_circ_4480,find_circ_3510
circ_3514	chr9	62068385	62088519	-	exon	ENSMUSG00000032252		-	643.385	-		-	-	-		-	-	477.102	ciri_circ_5290,find_circ_3514
circ_3524	chr19	3786389	3793215	+	exon	ENSMUSG00000045098		-	643.385	-		-	-	-		-	-	477.102	ciri_circ_4589,find_circ_3524
circ_3525	chr13	49687386	49693171	+	exon	ENSMUSG00000037851		-	1072.31	-		-	-	-		-	1581.59	-	ciri_circ_857,find_circ_3525
circ_3538	chr11	23333439	23355098	+	exon	ENSMUSG00000056342		-	643.385	-		-	-	-		842.777	-	-	ciri_circ_4045,find_circ_3538
circ_3539	chr15	85359454	85376702	+	exon	ENSMUSG00000016541		-	643.385	-		-	-	-		-	-	477.102	ciri_circ_4370,find_circ_3539
circ_3557	chr10	76317867	76319586	-	exon	ENSMUSG00000020231		-	643.385	-		925.936	-	-		-	-	-	ciri_circ_4017,find_circ_3557
circ_3564	chr12	56337764	56340603	-	exon	ENSMUSG00000021028		-	428.923	-		370.374	-	-		-	-	-	ciri_circ_4157,find_circ_3564
circ_3568	chr19	27386618	27399821	-	intergenic region	n/a		-	428.923	-		-	-	-		-	-	477.102	ciri_circ_4606,find_circ_3568
circ_3574	chr17	24100811	24111117	-	exon	ENSMUSG00000024122		-	428.923	-		-	-	-		-	-	477.102	ciri_circ_11529,find_circ_3574
circ_3575	chr2	30426399	30439764	+	exon	ENSMUSG00000039515		-	643.385	-		-	-	391.945		-	-	-	ciri_circ_4668,find_circ_3575
circ_3577	chr10	31502591	31534896	-	exon	ENSMUSG00000063760		-	857.846	-		555.562	-	-		-	-	-	ciri_circ_3986,find_circ_3577
circ_3579	chr5	121777370	121778105	+	exon	ENSMUSG00000042605		-	428.923	-		-	-	-		-	-	715.652	ciri_circ_4979,find_circ_3579
circ_3584	chr16	4648182	4649829	+	exon	ENSMUSG00000039646		-	428.923	-		-	-	-		-	-	477.102	ciri_circ_4386,find_circ_3584
circ_3588	chr13	6025932	6070691	+	intergenic region	n/a		-	428.923	-		-	603.381	-		-	-	-	ciri_circ_4199,find_circ_3588
circ_3605	chr15	3457930	3551722	-	intron	ENSMUSG00000055737		-	857.846	-		-	-	-		-	-	715.652	ciri_circ_1105,find_circ_3605
circ_3607	chr2	27737299	27741943	+	exon	ENSMUSG00000015846		-	428.923	-		555.562	-	-		-	-	-	ciri_circ_4665,find_circ_3607
circ_3609	chr10	128276486	128277218	+	exon	ENSMUSG00000040033		-	428.923	-		-	-	-		-	527.195	-	ciri_circ_4032,find_circ_3609
circ_3610	chr7	133961084	133968000	-	exon	ENSMUSG00000054555		-	643.385	-		-	603.381	-		-	-	-	ciri_circ_5173,find_circ_3610
circ_3625	chr11	75038613	75053963	+	exon	ENSMUSG00000038290		-	857.846	-		-	-	391.945		-	-	-	ciri_circ_4073,find_circ_3625
circ_3635	chr8	107338809	107361824	+	exon	ENSMUSG00000003847		-	857.846	-		370.374	-	-		-	-	-	ciri_circ_3563,find_circ_3635
circ_3650	chr16	55980595	55982406	+	exon	ENSMUSG00000022601		-	428.923	-		-	-	587.917		-	-	-	ciri_circ_4414,find_circ_3650
circ_3675	chr10	125994418	126000160	+	exon	ENSMUSG00000020105		-	643.385	-		-	-	391.945		-	-	-	ciri_circ_4030,find_circ_3675
circ_3679	chr19	34812278	34827373	-	exon	ENSMUSG00000033610		-	428.923	-		-	-	-		561.851	-	-	ciri_circ_9921,find_circ_3679
circ_3681	chr5	34601324	34604852	+	exon	ENSMUSG00000029106		-	428.923	-		-	402.254	-		-	-	-	ciri_circ_7274,find_circ_3681
circ_3685	chr6	118713257	118757526	-	exon	ENSMUSG00000051331		-	643.385	-		-	-	-		561.851	-	-	ciri_circ_5080,find_circ_3685
circ_3689	chr10	69927695	69932496	+	exon	ENSMUSG00000069601		-	428.923	-		-	402.254	-		-	-	-	ciri_circ_4014,find_circ_3689
circ_3691	chr7	83677987	83682949	-	exon	ENSMUSG00000001741		-	428.923	-		-	-	-		-	-	1192.75	ciri_circ_5136,find_circ_3691
circ_3693	chr6	84791241	84860718	-	exon	ENSMUSG00000033769		-	428.923	-		-	-	-		-	790.793	-	ciri_circ_5053,find_circ_3693
circ_3700	chr9	32728675	32738359	+	exon	ENSMUSG00000032035		-	643.385	-		-	-	-		561.851	-	-	ciri_circ_5267,find_circ_3700
circ_3702	chr2	146387228	146412868	-	exon	ENSMUSG00000037110		-	643.385	-		-	-	-		561.851	-	-	ciri_circ_4752,find_circ_3702
circ_3722	chr2	32204009	32208835	+	exon	ENSMUSG00000039262		-	428.923	-		-	402.254	-		-	-	-	ciri_circ_8071,find_circ_3722
circ_3729	chr5	108188932	108197970	+	exon	ENSMUSG00000056531		-	428.923	-		-	-	-		-	-	477.102	ciri_circ_10508,find_circ_3729
circ_3734	chr4	141698730	141703239	-	exon	ENSMUSG00000078515		-	428.923	-		-	-	391.945		-	-	-	ciri_circ_8941,find_circ_3734
circ_3742	chr11	29848815	29906331	-	exon	ENSMUSG00000044072		-	428.923	-		370.374	-	-		-	-	-	ciri_circ_6596,find_circ_3742
circ_3749	chr17	3437228	3454351	+	exon	ENSMUSG00000023800		-	428.923	454.199		-	-	-		-	-	-	ciri_circ_5780,find_circ_3749
circ_3753	chr17	78237742	78335355	+	exon	ENSMUSG00000024074		-	428.923	-		-	-	-		-	-	477.102	ciri_circ_4515,find_circ_3753
circ_3784	chr11	86732505	86733844	-	exon	ENSMUSG00000047126		-	428.923	-		-	-	-		-	-	477.102	ciri_circ_4089,find_circ_3784
circ_3785	chr10	7140319	7154485	-	exon	ENSMUSG00000015202		-	857.846	-		-	-	391.945		-	-	-	ciri_circ_3973,find_circ_3785
circ_3786	chr18	80434166	80460013	-	exon	ENSMUSG00000033323		-	428.923	-		370.374	-	-		-	-	-	ciri_circ_4580,find_circ_3786
circ_3788	chr2	33260478	33276235	-	exon	ENSMUSG00000038831		-	428.923	-		555.562	-	-		-	-	-	ciri_circ_4674,find_circ_3788
circ_3792	chr2	37543103	37563633	+	exon	ENSMUSG00000035437		-	643.385	-		740.749	-	-		-	-	-	ciri_circ_7053,find_circ_3792
circ_3798	chr11	80015143	80025954	+	exon	ENSMUSG00000017548		-	428.923	-		-	-	-		-	527.195	-	ciri_circ_4081,find_circ_3798
circ_3803	chr12	101883256	101890618	-	exon	ENSMUSG00000021188		-	428.923	-		370.374	-	-		-	-	-	ciri_circ_780,find_circ_3803
circ_3812	chr9	42437115	42443075	-	exon	ENSMUSG00000037287		-	428.923	-		-	-	-		-	527.195	-	ciri_circ_5275,find_circ_3812
circ_3817	chr11	30791092	30792038	+	exon	ENSMUSG00000040850		-	428.923	-		-	-	-		842.777	-	-	ciri_circ_10668,find_circ_3817
circ_3824	chr12	81474587	81510965	-	exon	ENSMUSG00000021139		-	428.923	454.199		-	-	-		-	-	-	ciri_circ_752,find_circ_3824
circ_3837	chr8	122305358	122323833	+	exon	ENSMUSG00000049577		-	428.923	-		-	-	391.945		-	-	-	ciri_circ_5247,find_circ_3837
circ_3842	chrX	98695999	98714211	-	exon	ENSMUSG00000031214		-	428.923	-		-	402.254	-		-	-	-	ciri_circ_5365,find_circ_3842
circ_3843	chr4	121154856	121190258	-	exon	ENSMUSG00000049878		-	428.923	-		370.374	-	-		-	-	-	ciri_circ_4892,find_circ_3843
circ_3844	chr4	121081172	121083425	-	exon	ENSMUSG00000043207		-	428.923	-		-	603.381	-		-	-	-	ciri_circ_4891,find_circ_3844
circ_3857	chr9	71705148	71717497	-	exon	ENSMUSG00000032232		-	428.923	681.298		-	-	-		-	-	-	ciri_circ_5306,find_circ_3857
circ_3858	chr14	33402865	33411024	-	exon	ENSMUSG00000021936		-	428.923	454.199		-	-	-		-	-	-	ciri_circ_5691,find_circ_3858
circ_3863	chr3	96136474	96145095	+	exon	ENSMUSG00000038495		-	643.385	-		-	-	391.945		-	-	-	ciri_circ_4816,find_circ_3863
circ_3868	chr17	50839615	50874708	-	intron	ENSMUSG00000023923		-	428.923	-		-	603.381	-		-	-	-	ciri_circ_7979,find_circ_3868
circ_3883	chr9	70740075	70748266	+	exon	ENSMUSG00000054693		-	643.385	681.298		-	-	-		-	-	-	ciri_circ_5304,find_circ_3883
circ_3886	chr1	64034532	64042437	-	exon	ENSMUSG00000025959		-	428.923	-		-	804.508	-		-	-	-	ciri_circ_7640,find_circ_3886
circ_3898	chr4	130768816	130774604	+	exon	ENSMUSG00000028580		-	643.385	-		-	-	587.917		-	-	-	ciri_circ_4901,find_circ_3898
circ_3900	chr5	104477043	104483253	+	exon	ENSMUSG00000034462		-	643.385	-		555.562	-	-		-	-	-	ciri_circ_4958,find_circ_3900
circ_3902	chr11	98372070	98373570	+	exon	ENSMUSG00000018167		-	857.846	-		-	-	-		842.777	-	-	ciri_circ_4102,find_circ_3902
circ_3914	chr8	85875634	85970997	+	exon	ENSMUSG00000036879		-	643.385	454.199		-	-	-		-	-	-	ciri_circ_3534,find_circ_3914
circ_3920	chr5	73510886	73534697	+	exon	ENSMUSG00000051674		-	428.923	-		370.374	-	-		-	-	-	ciri_circ_2756,find_circ_3920
circ_3925	chr12	111592577	111624543	+	exon	ENSMUSG00000007411		-	428.923	-		-	-	-		561.851	-	-	ciri_circ_4196,find_circ_3925
circ_3926	chr2	69934389	69938312	+	exon	ENSMUSG00000044308		-	428.923	-		-	-	-		561.851	-	-	ciri_circ_4693,find_circ_3926
circ_3937	chr12	77331896	77332329	+	exon	ENSMUSG00000021065		-	428.923	-		-	-	391.945		-	-	-	ciri_circ_4166,find_circ_3937
circ_3941	chr19	28283652	28357952	-	exon	ENSMUSG00000052942		-	428.923	-		-	-	587.917		-	-	-	ciri_circ_4608,find_circ_3941
circ_3948	chr11	104378685	104425293	-	exon	ENSMUSG00000018412		-	428.923	-		-	-	391.945		-	-	-	ciri_circ_4108,find_circ_3948
circ_3951	chr2	139731870	139749595	+	exon	ENSMUSG00000074766		-	643.385	-		370.374	-	-		-	-	-	ciri_circ_4744,find_circ_3951
circ_3954	chr18	36581068	36594322	+	exon	ENSMUSG00000024483		-	857.846	681.298		-	-	-		-	-	-	ciri_circ_4554,find_circ_3954
circ_3959	chr6	47484744	47497388	+	exon	ENSMUSG00000029686		-	643.385	-		-	-	979.862		-	-	-	ciri_circ_5035,find_circ_3959
circ_3968	chr3	148890412	148954735	-	exon	ENSMUSG00000028184		-	643.385	-		-	-	-		1123.7	-	-	ciri_circ_4843,find_circ_3968
circ_3972	chr5	111245514	111245969	-	intron	ENSMUSG00000033209		-	428.923	-		-	-	-		561.851	-	-	ciri_circ_4969,find_circ_3972
circ_3975	chr17	35278177	35305032	-	intergenic region	n/a		-	6004.92	-		-	-	3331.53		-	-	-	ciri_circ_1547,find_circ_3975
circ_3976	chr17	34729182	34809608	-	intergenic region	n/a		-	6219.39	-		-	-	5291.25		-	-	-	ciri_circ_4474,find_circ_3976
circ_3981	chr7	138868410	138876717	+	exon	ENSMUSG00000041769		-	428.923	-		-	-	-		-	-	477.102	ciri_circ_3388,find_circ_3981
circ_3988	chr19	42104858	42105483	+	exon	ENSMUSG00000025178		-	643.385	-		-	-	-		-	-	477.102	ciri_circ_4625,find_circ_3988
circ_3998	chr2	125088863	125116873	-	exon	ENSMUSG00000027201		-	428.923	-		-	402.254	-		-	-	-	ciri_circ_4730,find_circ_3998
circ_4004	chr3	56082372	56091120	-	exon	ENSMUSG00000027799		-	428.923	908.397		-	-	-		-	-	-	ciri_circ_6006,find_circ_4004
circ_4015	chr9	123542344	123552817	+	exon	ENSMUSG00000025240		-	643.385	-		-	-	391.945		-	-	-	ciri_circ_5340,find_circ_4015
circ_4018	chr19	25409086	25411764	+	exon	ENSMUSG00000032702		-	428.923	681.298		-	-	-		-	-	-	ciri_circ_4605,find_circ_4018
circ_4019	chr2	143830084	143832057	-	exon	ENSMUSG00000027420		-	428.923	-		370.374	-	-		-	-	-	ciri_circ_4751,find_circ_4019
circ_4020	chr3	37424511	37464658	+	exon	ENSMUSG00000027722		-	643.385	-		-	-	-		-	527.195	-	ciri_circ_4786,find_circ_4020
circ_4032	chr1	119765031	119783589	-	exon	ENSMUSG00000026384		-	428.923	-		-	-	391.945		-	-	-	ciri_circ_3941,find_circ_4032
circ_4034	chr17	86051086	86109334	-	exon	ENSMUSG00000024135		-	428.923	-		-	-	-		561.851	-	-	ciri_circ_4526,find_circ_4034
circ_4035	chr13	104390078	104400006	+	exon	ENSMUSG00000046169		-	428.923	-		-	-	-		-	527.195	-	ciri_circ_939,find_circ_4035
circ_4038	chrX	130178936	130181166	+	intron	ENSMUSG00000034480		-	428.923	-		555.562	-	-		-	-	-	ciri_circ_7606,find_circ_4038
circ_4042	chr4	119533313	119533809	-	exon	ENSMUSG00000087385		-	428.923	454.199		-	-	-		-	-	-	ciri_circ_6092,find_circ_4042
circ_4043	chr15	53101685	53107571	-	exon	ENSMUSG00000061731		-	428.923	-		-	-	-		561.851	-	-	ciri_circ_4351,find_circ_4043
circ_4045	chr18	36575019	36581215	+	exon	ENSMUSG00000024483		-	857.846	-		370.374	-	-		-	-	-	ciri_circ_4552,find_circ_4045
circ_4052	chr6	129180633	129183217	+	exon	ENSMUSG00000030157		-	428.923	-		370.374	-	-		-	-	-	ciri_circ_7397,find_circ_4052
circ_4058	chr8	88156462	88158265	+	exon	ENSMUSG00000031657		-	428.923	-		-	-	-		561.851	-	-	ciri_circ_5225,find_circ_4058
circ_4076	chr11	107095716	107099789	-	exon	ENSMUSG00000040481		-	428.923	-		-	-	-		-	527.195	-	ciri_circ_9241,find_circ_4076
circ_4078	chr15	8139851	8141359	+	exon	ENSMUSG00000022142		-	428.923	-		-	-	1175.83		-	-	-	ciri_circ_4337,find_circ_4078
circ_4081	chr14	14820778	14846691	+	exon	ENSMUSG00000042567		-	428.923	-		-	-	391.945		-	-	-	ciri_circ_959,find_circ_4081
circ_4087	chr3	87926731	87928048	-	exon	ENSMUSG00000004896		-	428.923	681.298		-	-	-		-	-	-	ciri_circ_4800,find_circ_4087
circ_4090	chr16	4417853	4419588	-	exon	ENSMUSG00000005580		-	428.923	-		-	-	391.945		-	-	-	ciri_circ_4385,find_circ_4090
circ_4092	chr10	59727957	59750547	+	exon	ENSMUSG00000020111		-	428.923	-		-	-	391.945		-	-	-	ciri_circ_293,find_circ_4092
circ_4097	chr7	102160541	102180515	-	exon	ENSMUSG00000063550		-	428.923	-		-	-	-		-	527.195	-	ciri_circ_5149,find_circ_4097
circ_4110	chr12	54975104	54975382	-	exon	ENSMUSG00000035021		-	643.385	-		-	-	-		-	-	477.102	ciri_circ_4149,find_circ_4110
circ_4111	chr1	140351208	140383095	+	exon	ENSMUSG00000052726		-	428.923	-		-	1005.64	-		-	-	-	ciri_circ_123,find_circ_4111
circ_4113	chr13	6025932	6109295	+	intergenic region	n/a		-	857.846	-		370.374	-	-		-	-	-	ciri_circ_4200,find_circ_4113
circ_4117	chr6	119620311	119694731	-	exon	ENSMUSG00000030172		-	428.923	-		-	402.254	-		-	-	-	ciri_circ_5083,find_circ_4117
circ_4127	chr1	33628395	33630433	-	exon	ENSMUSG00000026134		-	428.923	-		370.374	-	-		-	-	-	ciri_circ_6455,find_circ_4127
circ_4131	chr13	24836016	24840558	+	exon	ENSMUSG00000035958		-	428.923	-		-	-	-		-	-	477.102	ciri_circ_825,find_circ_4131
circ_4135	chr7	66330669	66342925	-	exon	ENSMUSG00000015133		-	428.923	454.199		-	-	-		-	-	-	ciri_circ_6269,find_circ_4135
circ_4142	chr12	111219811	111243538	+	exon	ENSMUSG00000021277		-	428.923	-		-	-	-		-	527.195	-	ciri_circ_4194,find_circ_4142
circ_4152	chr11	94013623	94048558	+	exon	ENSMUSG00000020859		-	428.923	-		-	-	391.945		-	-	-	ciri_circ_4098,find_circ_4152
circ_4171	chr12	110896087	110915478	+	exon	ENSMUSG00000021275		-	428.923	-		370.374	-	-		-	-	-	ciri_circ_4193,find_circ_4171
circ_4174	chr19	28530479	28531986	-	intron	ENSMUSG00000052942		-	428.923	-		1481.5	-	-		-	-	-	ciri_circ_7003,find_circ_4174
circ_4198	chr2	31033030	31040514	-	exon	ENSMUSG00000075415		-	428.923	-		-	-	-		-	527.195	-	ciri_circ_4669,find_circ_4198
circ_4200	chr6	24491464	24505911	-	exon	ENSMUSG00000046192		-	1072.31	-		-	-	979.862		-	-	-	ciri_circ_5015,find_circ_4200
circ_4201	chr4	132204132	132205715	-	exon	ENSMUSG00000040025		-	428.923	454.199		-	-	-		-	-	-	ciri_circ_2629,find_circ_4201
circ_4203	chr14	122950489	122973285	-	exon	ENSMUSG00000041594		-	428.923	-		-	-	-		-	-	715.652	ciri_circ_4328,find_circ_4203
circ_4205	chr7	98706997	98710233	+	exon	ENSMUSG00000030753		-	428.923	454.199		-	-	-		-	-	-	ciri_circ_6282,find_circ_4205
circ_4209	chr10	128277644	128278817	+	exon	ENSMUSG00000040033		-	857.846	-		740.749	-	-		-	-	-	ciri_circ_390,find_circ_4209
circ_4210	chr5	140105515	140144060	-	exon	ENSMUSG00000029554		-	428.923	-		-	402.254	-		-	-	-	ciri_circ_4994,find_circ_4210
circ_4213	chr15	36186607	36200361	+	exon	ENSMUSG00000037617		-	428.923	-		-	402.254	-		-	-	-	ciri_circ_7904,find_circ_4213
circ_4221	chr4	53481464	53491530	+	exon	ENSMUSG00000028412		-	428.923	454.199		-	-	-		-	-	-	ciri_circ_4859,find_circ_4221
circ_4223	chr9	70703287	70754325	+	exon	ENSMUSG00000054693		-	643.385	681.298		-	-	-		-	-	-	ciri_circ_5303,find_circ_4223
circ_4226	chr3	97792739	97796808	-	exon	ENSMUSG00000038170		-	643.385	-		370.374	-	-		-	-	-	ciri_circ_4817,find_circ_4226
circ_4249	chr18	24622079	24622667	+	exon	ENSMUSG00000024271		-	643.385	-		-	-	-		-	-	715.652	ciri_circ_4543,find_circ_4249
circ_4255	chr6	12351985	12381415	-	exon	ENSMUSG00000032625		-	428.923	-		-	603.381	-		-	-	-	ciri_circ_5010,find_circ_4255
circ_4283	chr4	22375661	22377077	+	exon	ENSMUSG00000040410		-	428.923	-		-	-	587.917		-	-	-	ciri_circ_4854,find_circ_4283
circ_4285	chr2	48927096	48940400	-	exon	ENSMUSG00000026761		-	428.923	-		-	-	-		-	527.195	-	ciri_circ_2046,find_circ_4285
circ_4290	chr18	64470682	64475205	-	exon	ENSMUSG00000024588		-	428.923	-		-	-	-		-	527.195	-	ciri_circ_4567,find_circ_4290
circ_4292	chr15	99738665	99745946	-	exon	ENSMUSG00000023021		-	857.846	-		925.936	-	-		-	-	-	ciri_circ_4377,find_circ_4292
circ_4296	chr13	17772301	17772957	-	exon	ENSMUSG00000041297		-	428.923	-		-	804.508	-		-	-	-	ciri_circ_4202,find_circ_4296
circ_4310	chr16	35449403	35466657	-	exon	ENSMUSG00000022844		-	428.923	-		-	-	-		-	-	954.203	ciri_circ_4410,find_circ_4310
circ_4311	chr11	60747866	60749589	-	exon	ENSMUSG00000002814		-	428.923	454.199		-	-	-		-	-	-	ciri_circ_4062,find_circ_4311
circ_4312	chr17	73909247	73912540	-	exon	ENSMUSG00000024066		-	428.923	-		-	-	1175.83		-	-	-	ciri_circ_1634,find_circ_4312
circ_4321	chr17	26736789	26759949	+	exon	ENSMUSG00000048249		-	428.923	-		-	402.254	-		-	-	-	ciri_circ_4462,find_circ_4321
circ_4322	chr2	167206734	167227585	-	exon	ENSMUSG00000017969		-	643.385	-		-	402.254	-		-	-	-	ciri_circ_4774,find_circ_4322
circ_4324	chr5	142787134	142793160	-	exon	ENSMUSG00000039477		-	643.385	-		-	-	-		842.777	-	-	ciri_circ_4998,find_circ_4324
circ_4325	chr9	15340874	15341624	-	exon	ENSMUSG00000046111		-	428.923	-		-	402.254	-		-	-	-	ciri_circ_5256,find_circ_4325
circ_4354	chr13	24064577	24094570	-	exon	ENSMUSG00000021338		-	428.923	454.199		-	-	-		-	-	-	ciri_circ_5624,find_circ_4354
circ_4375	chr3	148954563	148954735	-	exon	ENSMUSG00000028184		-	428.923	-		-	-	-		-	-	477.102	ciri_circ_4844,find_circ_4375
circ_4379	chr15	38672857	38683009	+	exon	ENSMUSG00000022295		-	428.923	454.199		-	-	-		-	-	-	ciri_circ_1148,find_circ_4379
circ_4385	chr8	107081093	107083069	-	exon	ENSMUSG00000031921		-	-	681.298		-	-	-		561.851	-	-	ciri_circ_6338,find_circ_4385
circ_4399	chr2	101741287	101772408	-	exon	ENSMUSG00000032841		-	-	454.199		370.374	-	-		-	-	-	ciri_circ_5953,find_circ_4399
circ_4401	chr3	103330080	103331807	+	exon	ENSMUSG00000033014		-	-	454.199		-	-	-		-	-	477.102	ciri_circ_4823,find_circ_4401
circ_4404	chr11	119208771	119210740	-	exon	ENSMUSG00000039976		-	-	681.298		-	-	-		561.851	-	-	ciri_circ_5572,find_circ_4404
circ_4416	chr19	26619684	26640649	+	exon	ENSMUSG00000024921		-	-	908.397		-	-	391.945		-	-	-	ciri_circ_5879,find_circ_4416
circ_4422	chr2	24839530	24877626	-	exon	ENSMUSG00000036893		-	-	454.199		-	603.381	-		-	-	-	ciri_circ_8066,find_circ_4422
circ_4424	chr6	71394625	71414919	-	exon	ENSMUSG00000002222		-	-	681.298		-	603.381	-		-	-	-	ciri_circ_6218,find_circ_4424
circ_4426	chr4	88121270	88129052	+	exon	ENSMUSG00000038368		-	-	454.199		555.562	-	-		-	-	-	ciri_circ_4874,find_circ_4426
circ_4428	chr3	36964875	36975762	+	exon	ENSMUSG00000037270		-	-	681.298		-	-	-		561.851	-	-	ciri_circ_6001,find_circ_4428
circ_4432	chr11	21263199	21278060	+	exon	ENSMUSG00000020128		-	-	454.199		-	-	-		842.777	-	-	ciri_circ_5508,find_circ_4432
circ_4436	chr8	26004416	26013555	-	exon	ENSMUSG00000015994		-	-	454.199		-	402.254	-		-	-	-	ciri_circ_6309,find_circ_4436
circ_4439	chr8	88144529	88150369	+	exon	ENSMUSG00000031657		-	-	681.298		-	-	-		-	-	477.102	ciri_circ_10584,find_circ_4439
circ_4444	chr10	49240579	49245384	-	intron	ENSMUSG00000056073		-	-	681.298		-	1005.64	-		-	-	-	ciri_circ_5467,find_circ_4444
circ_4451	chr8	61349400	61353848	+	exon	ENSMUSG00000031642		-	-	454.199		-	-	391.945		-	-	-	ciri_circ_6313,find_circ_4451
circ_4454	chr4	21759370	21759793	-	exon	ENSMUSG00000028251		-	-	454.199		-	-	-		-	527.195	-	ciri_circ_6055,find_circ_4454
circ_4455	chr10	49522307	49578302	-	intron	ENSMUSG00000056073		-	-	454.199		370.374	-	-		-	-	-	ciri_circ_5468,find_circ_4455
circ_4463	chr9	102618811	102619760	-	exon	ENSMUSG00000032534		-	-	454.199		-	-	-		-	527.195	-	ciri_circ_8440,find_circ_4463
circ_4464	chr19	34795615	34827373	-	intergenic region	n/a		-	-	454.199		-	-	-		-	-	477.102	ciri_circ_5881,find_circ_4464
circ_4475	chr3	35778025	35789661	+	exon	ENSMUSG00000037400		-	-	681.298		-	-	-		-	527.195	-	ciri_circ_2288,find_circ_4475
circ_4480	chr8	77344640	77388735	-	exon	ENSMUSG00000037148		-	-	454.199		370.374	-	-		-	-	-	ciri_circ_6320,find_circ_4480
circ_4491	chr17	63896018	63991716	+	exon	ENSMUSG00000000127		-	-	454.199		-	-	-		-	-	477.102	ciri_circ_7985,find_circ_4491
circ_4492	chr7	101250445	101259773	+	exon	ENSMUSG00000030691		-	-	454.199		-	-	-		561.851	-	-	ciri_circ_10553,find_circ_4492
circ_4497	chr12	111081724	111097616	+	exon	ENSMUSG00000037896		-	-	454.199		-	-	-		-	527.195	-	ciri_circ_11072,find_circ_4497
circ_4498	chr19	44941459	44960875	+	exon	ENSMUSG00000036097		-	-	681.298		-	-	391.945		-	-	-	ciri_circ_5891,find_circ_4498
circ_4499	chrX	94098283	94114263	-	exon	ENSMUSG00000079509		-	-	2270.99		-	2011.27	-		-	-	-	ciri_circ_3839,find_circ_4499
circ_4500	chr7	46590607	46635556	-	exon	ENSMUSG00000030839		-	-	454.199		740.749	-	-		-	-	-	ciri_circ_3228,find_circ_4500
circ_4521	chr10	12678580	12688427	-	exon	ENSMUSG00000019820		-	-	454.199		-	402.254	-		-	-	-	ciri_circ_5452,find_circ_4521
circ_4531	chr3	51323222	51326035	-	exon	ENSMUSG00000037174		-	-	454.199		555.562	-	-		-	-	-	ciri_circ_2305,find_circ_4531
circ_4545	chr11	3170587	3179507	-	exon	ENSMUSG00000023764		-	-	454.199		370.374	-	-		-	-	-	ciri_circ_5503,find_circ_4545
circ_4560	chr15	85359454	85393506	+	exon	ENSMUSG00000016541		-	-	908.397		-	-	587.917		-	-	-	ciri_circ_5754,find_circ_4560
circ_4573	chr17	80644132	80644845	-	exon	ENSMUSG00000024242		-	-	681.298		-	-	-		-	527.195	-	ciri_circ_1661,find_circ_4573
circ_4575	chr15	68101471	68146591	-	exon	ENSMUSG00000022335		-	-	454.199		-	-	-		842.777	-	-	ciri_circ_5743,find_circ_4575
circ_4579	chr4	99746326	99753191	+	exon	ENSMUSG00000073792		-	-	454.199		-	-	-		561.851	-	-	ciri_circ_6087,find_circ_4579
circ_4581	chr9	21191327	21201417	+	exon	ENSMUSG00000032177		-	-	454.199		370.374	-	-		-	-	-	ciri_circ_7520,find_circ_4581
circ_4593	chr14	105287617	105298127	+	exon	ENSMUSG00000053253		-	-	681.298		-	-	-		-	-	477.102	ciri_circ_5714,find_circ_4593
circ_4596	chr4	99212577	99235186	+	exon	ENSMUSG00000028550		-	-	681.298		-	-	-		-	-	715.652	ciri_circ_6086,find_circ_4596
circ_4599	chr3	116791006	116793822	-	exon	ENSMUSG00000033400		-	-	454.199		-	-	391.945		-	-	-	ciri_circ_8906,find_circ_4599
circ_4601	chr13	34076178	34128531	-	intergenic region	n/a		-	-	908.397		-	-	1175.83		-	-	-	ciri_circ_9793,find_circ_4601
circ_4622	chr12	113112146	113123234	+	exon	ENSMUSG00000021144		-	-	454.199		-	-	391.945		-	-	-	ciri_circ_805,find_circ_4622
circ_4630	chr1	37377578	37380060	+	exon	ENSMUSG00000026113		-	-	454.199		-	-	391.945		-	-	-	ciri_circ_5397,find_circ_4630
circ_4636	chr2	34429518	34444406	+	exon	ENSMUSG00000038696		-	-	454.199		555.562	-	-		-	-	-	ciri_circ_5915,find_circ_4636
circ_4645	chr5	138616566	138617054	-	exon	ENSMUSG00000058291		-	-	681.298		-	-	391.945		-	-	-	ciri_circ_6178,find_circ_4645
circ_4651	chr15	89242160	89243459	+	exon	ENSMUSG00000036561		-	-	908.397		-	-	-		-	-	954.203	ciri_circ_5756,find_circ_4651
circ_4658	chr12	101937337	101948439	-	exon	ENSMUSG00000021189		-	-	681.298		-	-	-		842.777	-	-	ciri_circ_5611,find_circ_4658
circ_4666	chr6	147590387	147592215	+	exon	ENSMUSG00000030301		-	-	454.199		-	402.254	-		-	-	-	ciri_circ_6246,find_circ_4666
circ_4667	chr14	79355721	79370097	-	exon	ENSMUSG00000022020		-	-	681.298		-	402.254	-		-	-	-	ciri_circ_4310,find_circ_4667
circ_4676	chr7	17044377	17044967	-	exon	ENSMUSG00000004328		-	-	681.298		-	402.254	-		-	-	-	ciri_circ_6250,find_circ_4676
circ_4686	chr5	124386830	124388660	-	exon	ENSMUSG00000038095		-	-	454.199		-	-	-		561.851	-	-	ciri_circ_6171,find_circ_4686
circ_4687	chr18	60689249	60713632	-	intergenic region	n/a		-	-	454.199		370.374	-	-		-	-	-	ciri_circ_6973,find_circ_4687
circ_4694	chr14	103089302	103092426	-	exon	ENSMUSG00000022124		-	-	908.397		1481.5	-	-		-	-	-	ciri_circ_5712,find_circ_4694
circ_4699	chr2	71088347	71089933	+	exon	ENSMUSG00000041966		-	-	454.199		-	-	-		-	-	477.102	ciri_circ_9445,find_circ_4699
circ_4701	chr11	98693383	98694293	+	exon	ENSMUSG00000017221		-	-	454.199		555.562	-	-		-	-	-	ciri_circ_4103,find_circ_4701
circ_4706	chr18	6049277	6070091	-	exon	ENSMUSG00000041225		-	-	454.199		-	-	-		561.851	-	-	ciri_circ_5838,find_circ_4706
circ_4708	chr18	36638205	36640360	+	exon	ENSMUSG00000024483		-	-	454.199		370.374	-	-		-	-	-	ciri_circ_6966,find_circ_4708
circ_4709	chr7	127802014	127802398	+	exon	ENSMUSG00000108815		-	-	454.199		-	-	-		-	527.195	-	ciri_circ_6300,find_circ_4709
circ_4710	chr1	192716957	192727478	-	exon	ENSMUSG00000037375		-	-	454.199		370.374	-	-		-	-	-	ciri_circ_5446,find_circ_4710
circ_4730	chr9	122365136	122379008	+	exon	ENSMUSG00000032540		-	-	454.199		370.374	-	-		-	-	-	ciri_circ_3793,find_circ_4730
circ_4750	chr8	127426522	127474615	+	exon	ENSMUSG00000025812		-	-	681.298		740.749	-	-		-	-	-	ciri_circ_6353,find_circ_4750
circ_4752	chr12	40668406	40676790	+	exon	ENSMUSG00000035954		-	-	454.199		-	-	-		-	-	715.652	ciri_circ_663,find_circ_4752
circ_4757	chr3	146487200	146493843	-	exon	ENSMUSG00000028188		-	-	454.199		555.562	-	-		-	-	-	ciri_circ_6046,find_circ_4757
circ_4759	chr6	12468789	12504164	-	exon	ENSMUSG00000032625		-	-	681.298		370.374	-	-		-	-	-	ciri_circ_6191,find_circ_4759
circ_4761	chr11	53280468	53292314	-	exon	ENSMUSG00000020361		-	-	454.199		-	-	391.945		-	-	-	ciri_circ_5525,find_circ_4761
circ_4771	chr8	3158696	3174888	-	exon	ENSMUSG00000005534		-	-	454.199		-	-	-		-	-	477.102	ciri_circ_6304,find_circ_4771
circ_4775	chr2	30426399	30432086	+	exon	ENSMUSG00000039515		-	-	454.199		-	402.254	-		-	-	-	ciri_circ_5913,find_circ_4775
circ_4776	chr18	77995512	77997369	+	exon	ENSMUSG00000039840		-	-	908.397		1296.31	-	-		-	-	-	ciri_circ_1794,find_circ_4776
circ_4777	chr2	118222326	118253418	-	exon	ENSMUSG00000027344		-	-	454.199		-	402.254	-		-	-	-	ciri_circ_4721,find_circ_4777
circ_4791	chr16	32950292	32975849	+	exon	ENSMUSG00000022801		-	-	454.199		-	-	-		1123.7	-	-	ciri_circ_5769,find_circ_4791
circ_4799	chr3	108975245	109003420	-	exon	ENSMUSG00000040339		-	-	454.199		-	-	-		-	790.793	-	ciri_circ_6027,find_circ_4799
circ_4803	chr10	39783143	39806983	+	exon	ENSMUSG00000019841		-	-	454.199		-	402.254	-		-	-	-	ciri_circ_5459,find_circ_4803
circ_4804	chr10	25993367	25994385	-	exon	ENSMUSG00000049420		-	-	454.199		370.374	-	-		-	-	-	ciri_circ_5455,find_circ_4804
circ_4805	chr1	78681593	78705391	+	exon	ENSMUSG00000032883		-	-	454.199		-	-	-		561.851	-	-	ciri_circ_5413,find_circ_4805
circ_4811	chr18	16640422	16650498	-	exon	ENSMUSG00000024304		-	-	454.199		-	-	783.89		-	-	-	ciri_circ_8777,find_circ_4811
circ_4817	chr2	34432003	34435222	+	exon	ENSMUSG00000038696		-	-	454.199		-	-	-		-	-	477.102	ciri_circ_5916,find_circ_4817
circ_4821	chr9	25124872	25133272	-	exon	ENSMUSG00000008429		-	-	454.199		370.374	-	-		-	-	-	ciri_circ_6360,find_circ_4821
circ_4822	chr19	40311669	40327622	-	exon	ENSMUSG00000025006		-	-	681.298		370.374	-	-		-	-	-	ciri_circ_5885,find_circ_4822
circ_4836	chr9	34983621	34985144	-	intron	ENSMUSG00000032036		-	-	454.199		370.374	-	-		-	-	-	ciri_circ_6361,find_circ_4836
circ_4840	chr7	116394201	116405963	-	exon	ENSMUSG00000030660		-	-	454.199		-	402.254	-		-	-	-	ciri_circ_6294,find_circ_4840
circ_4846	chr10	116498086	116499466	-	exon	ENSMUSG00000020166		-	-	454.199		-	603.381	-		-	-	-	ciri_circ_7722,find_circ_4846
circ_4860	chr10	68118251	68135106	-	exon	ENSMUSG00000019947		-	-	454.199		1111.12	-	-		-	-	-	ciri_circ_5479,find_circ_4860
circ_4866	chr6	43423621	43488970	-	exon	ENSMUSG00000029735		-	-	681.298		-	-	-		561.851	-	-	ciri_circ_6207,find_circ_4866
circ_4873	chr19	3600673	3605494	-	exon	ENSMUSG00000024913		-	-	454.199		-	-	-		561.851	-	-	ciri_circ_10803,find_circ_4873
circ_4897	chr10	83558598	83564537	+	exon	ENSMUSG00000034560		-	-	454.199		-	-	587.917		-	-	-	ciri_circ_5486,find_circ_4897
circ_4906	chr2	77089070	77108479	-	exon	ENSMUSG00000044033		-	-	681.298		-	-	-		-	527.195	-	ciri_circ_5942,find_circ_4906
circ_4909	chr5	150469677	150471610	+	exon	ENSMUSG00000056602		-	-	454.199		370.374	-	-		-	-	-	ciri_circ_6186,find_circ_4909
circ_4910	chr4	55060014	55073105	+	exon	ENSMUSG00000060206		-	-	454.199		-	-	783.89		-	-	-	ciri_circ_6066,find_circ_4910
circ_4912	chr1	60194504	60206416	+	exon	ENSMUSG00000073664		-	-	681.298		-	402.254	-		-	-	-	ciri_circ_49,find_circ_4912
circ_4914	chr7	127521989	127525905	+	exon	ENSMUSG00000053877		-	-	908.397		370.374	-	-		-	-	-	ciri_circ_6298,find_circ_4914
circ_4916	chr15	35792039	35794489	+	exon	ENSMUSG00000037646		-	-	454.199		-	-	391.945		-	-	-	ciri_circ_4347,find_circ_4916
circ_4924	chr5	3722546	3755776	-	exon	ENSMUSG00000040351		-	-	454.199		-	-	-		-	-	715.652	ciri_circ_4918,find_circ_4924
circ_4926	chr19	5283643	5288413	-	exon	ENSMUSG00000024853		-	-	454.199		370.374	-	-		-	-	-	ciri_circ_6987,find_circ_4926
circ_4930	chr11	80586847	80601806	-	exon	ENSMUSG00000035441		-	-	454.199		-	-	-		-	-	477.102	ciri_circ_11408,find_circ_4930
circ_4932	chr18	42519368	42523066	+	exon	ENSMUSG00000024498		-	-	681.298		-	603.381	-		-	-	-	ciri_circ_5854,find_circ_4932
circ_4936	chr4	141520859	141522392	-	intron	ENSMUSG00000040761		-	-	454.199		555.562	-	-		-	-	-	ciri_circ_6103,find_circ_4936
circ_4940	chr2	24884146	24884702	-	exon	ENSMUSG00000036893		-	-	454.199		-	-	-		561.851	-	-	ciri_circ_5907,find_circ_4940
circ_4945	chr12	116363395	116367839	+	exon	ENSMUSG00000021171		-	-	681.298		-	402.254	-		-	-	-	ciri_circ_5618,find_circ_4945
circ_4968	chr5	32819866	32822138	-	exon	ENSMUSG00000093574		-	-	1135.5		-	-	-		-	-	1192.75	ciri_circ_2718,find_circ_4968
circ_4976	chr15	75666253	75667965	-	exon	ENSMUSG00000000934		-	-	454.199		-	603.381	-		-	-	-	ciri_circ_1204,find_circ_4976
circ_4978	chr5	28358274	28368313	+	exon	ENSMUSG00000048271		-	-	681.298		-	402.254	-		-	-	-	ciri_circ_2702,find_circ_4978
circ_4981	chr10	71363450	71381760	+	exon	ENSMUSG00000060733		-	-	454.199		-	-	-		-	-	477.102	ciri_circ_4015,find_circ_4981
circ_4982	chr4	8751324	8753148	+	exon	ENSMUSG00000041235		-	-	454.199		-	-	-		-	527.195	-	ciri_circ_6050,find_circ_4982
circ_4986	chr11	74836363	74842353	+	exon	ENSMUSG00000000282		-	-	681.298		370.374	-	-		-	-	-	ciri_circ_5542,find_circ_4986
circ_4988	chr13	14120141	14129265	+	exon	ENSMUSG00000039219		-	-	454.199		-	-	-		-	527.195	-	ciri_circ_5622,find_circ_4988
circ_5003	chr15	95864225	95920378	+	exon	ENSMUSG00000064210		-	-	454.199		-	402.254	-		-	-	-	ciri_circ_4374,find_circ_5003
circ_5008	chr8	77572009	77581344	+	exon	ENSMUSG00000037134		-	-	454.199		-	-	-		-	790.793	-	ciri_circ_11319,find_circ_5008
circ_5009	chr13	63894638	63898663	+	exon	ENSMUSG00000021470		-	-	908.397		-	-	-		-	-	477.102	ciri_circ_5641,find_circ_5009
circ_5017	chr12	85320714	85322079	-	exon	ENSMUSG00000034290		-	-	454.199		-	-	-		561.851	-	-	ciri_circ_10696,find_circ_5017
circ_5026	chr17	84334026	84336882	-	exon	ENSMUSG00000024251		-	-	454.199		-	-	-		-	527.195	-	ciri_circ_5829,find_circ_5026
circ_5042	chr7	67662327	67711503	+	exon	ENSMUSG00000030555		-	-	681.298		370.374	-	-		-	-	-	ciri_circ_6271,find_circ_5042
circ_5046	chr11	60270318	60280283	-	exon	ENSMUSG00000000538		-	-	681.298		370.374	-	-		-	-	-	ciri_circ_5530,find_circ_5046
circ_5051	chr2	69914414	69917235	+	exon	ENSMUSG00000044308		-	-	681.298		-	-	391.945		-	-	-	ciri_circ_5933,find_circ_5051
circ_5063	chr3	137885273	137908619	+	exon	ENSMUSG00000074212		-	-	454.199		-	-	391.945		-	-	-	ciri_circ_6044,find_circ_5063
circ_5070	chr6	134062068	134066465	+	intron	ENSMUSG00000030199		-	-	454.199		-	-	-		-	527.195	-	ciri_circ_7400,find_circ_5070
circ_5077	chr2	118630945	118631899	+	exon	ENSMUSG00000040084		-	-	454.199		-	-	-		-	-	715.652	ciri_circ_9458,find_circ_5077
circ_5086	chr11	3186065	3187410	-	exon	ENSMUSG00000023764		-	-	454.199		370.374	-	-		-	-	-	ciri_circ_6582,find_circ_5086
circ_5104	chr10	117784995	117787911	-	exon	ENSMUSG00000052798		-	-	454.199		555.562	-	-		-	-	-	ciri_circ_5498,find_circ_5104
circ_5108	chr17	25235182	25235627	-	exon	ENSMUSG00000035521		-	-	454.199		-	-	391.945		-	-	-	ciri_circ_5799,find_circ_5108
circ_5112	chr3	142277817	142284916	-	exon	ENSMUSG00000028273		-	-	454.199		-	-	-		-	-	477.102	ciri_circ_11623,find_circ_5112
circ_5128	chr7	99099312	99118305	-	exon	ENSMUSG00000035354		-	-	454.199		-	-	391.945		-	-	-	ciri_circ_6283,find_circ_5128
circ_5131	chr2	28661582	28663644	+	exon	ENSMUSG00000026812		-	-	454.199		-	-	-		-	-	715.652	ciri_circ_5910,find_circ_5131
circ_5132	chr3	94635409	94721974	-	intergenic region	n/a		-	-	2043.89		-	1407.89	-		-	-	-	ciri_circ_2389,find_circ_5132
circ_5135	chr6	11986342	11997194	+	exon	ENSMUSG00000029629		-	-	681.298		-	-	-		-	527.195	-	ciri_circ_6189,find_circ_5135
circ_5138	chr1	34819592	34820009	-	exon	ENSMUSG00000037503		-	-	454.199		-	-	-		-	527.195	-	ciri_circ_5394,find_circ_5138
circ_5142	chr17	87008803	87023913	-	exon	ENSMUSG00000024145		-	-	454.199		-	-	-		842.777	-	-	ciri_circ_1675,find_circ_5142
circ_5143	chr12	77277361	77332329	+	exon	ENSMUSG00000021065		-	-	454.199		370.374	-	-		-	-	-	ciri_circ_5596,find_circ_5143
circ_5144	chr1	92148256	92148494	-	exon	ENSMUSG00000026313		-	-	681.298		-	-	-		1404.63	-	-	ciri_circ_5416,find_circ_5144
circ_5146	chr18	36646691	36648740	+	exon	ENSMUSG00000024483		-	-	454.199		370.374	-	-		-	-	-	ciri_circ_5851,find_circ_5146
circ_5151	chr2	20854935	20860036	-	exon	ENSMUSG00000036591		-	-	454.199		-	-	-		-	527.195	-	ciri_circ_11182,find_circ_5151
circ_5156	chr4	33320519	33356196	+	exon	ENSMUSG00000028274		-	-	454.199		-	-	-		561.851	-	-	ciri_circ_9513,find_circ_5156
circ_5158	chr12	69632060	69658078	-	exon	ENSMUSG00000034801		-	-	908.397		-	402.254	-		-	-	-	ciri_circ_5594,find_circ_5158
circ_5163	chr9	22643757	22679064	+	exon	ENSMUSG00000035919		-	-	454.199		370.374	-	-		-	-	-	ciri_circ_7524,find_circ_5163
circ_5168	chr11	5864824	5865310	+	exon	ENSMUSG00000020473		-	-	681.298		-	-	-		561.851	-	-	ciri_circ_4037,find_circ_5168
circ_5176	chr5	3818527	3822243	+	exon	ENSMUSG00000000600		-	-	454.199		-	-	-		-	-	477.102	ciri_circ_6114,find_circ_5176
circ_5180	chr10	108198833	108234143	+	exon	ENSMUSG00000019907		-	-	454.199		-	804.508	-		-	-	-	ciri_circ_5492,find_circ_5180
circ_5199	chr2	84602328	84624558	-	exon	ENSMUSG00000034101		-	-	681.298		-	-	-		-	-	715.652	ciri_circ_5945,find_circ_5199
circ_5201	chr5	121810851	121811612	+	exon	ENSMUSG00000042605		-	-	454.199		-	-	-		-	-	954.203	ciri_circ_11662,find_circ_5201
circ_5204	chr2	143938385	143940028	+	exon	ENSMUSG00000015932		-	-	454.199		-	-	-		842.777	-	-	ciri_circ_5972,find_circ_5204
circ_5207	chr8	119541585	119546241	-	exon	ENSMUSG00000031835		-	-	454.199		-	-	-		-	790.793	-	ciri_circ_6347,find_circ_5207
circ_5208	chrX	48415215	48424354	-	exon	ENSMUSG00000031103		-	-	454.199		-	603.381	-		-	-	-	ciri_circ_6419,find_circ_5208
circ_5215	chr11	85531793	85559171	+	exon	ENSMUSG00000059439		-	-	454.199		-	-	-		-	-	715.652	ciri_circ_5551,find_circ_5215
circ_5218	chr7	121118542	121122083	+	exon	ENSMUSG00000034990		-	-	454.199		-	-	-		-	790.793	-	ciri_circ_6297,find_circ_5218
circ_5220	chr6	149068050	149084936	-	exon	ENSMUSG00000030313		-	-	908.397		-	-	-		-	-	477.102	ciri_circ_3189,find_circ_5220
circ_5239	chr18	44510097	44534300	-	exon	ENSMUSG00000071856		-	-	454.199		-	-	391.945		-	-	-	ciri_circ_5856,find_circ_5239
circ_5244	chr5	100883190	100886019	+	exon	ENSMUSG00000029314		-	-	454.199		-	-	587.917		-	-	-	ciri_circ_6145,find_circ_5244
circ_5245	chr13	103833498	103839490	-	exon	ENSMUSG00000021709		-	-	908.397		370.374	-	-		-	-	-	ciri_circ_5657,find_circ_5245
circ_5266	chr4	132656693	132680893	+	exon	ENSMUSG00000028886		-	-	681.298		-	402.254	-		-	-	-	ciri_circ_6099,find_circ_5266
circ_5274	chr4	135418380	135425445	-	exon	ENSMUSG00000059713		-	-	681.298		-	-	-		-	-	477.102	ciri_circ_6101,find_circ_5274
circ_5278	chr15	80884207	80889155	+	exon	ENSMUSG00000047888		-	-	681.298		-	-	-		561.851	-	-	ciri_circ_5752,find_circ_5278
circ_5281	chr5	13451104	13523173	+	exon	ENSMUSG00000028883		-	-	1362.6		-	1005.64	-		-	-	-	ciri_circ_6117,find_circ_5281
circ_5302	chr6	119357216	119370408	-	exon	ENSMUSG00000030168		-	-	454.199		-	-	-		-	-	477.102	ciri_circ_5082,find_circ_5302
circ_5305	chr14	21618891	21626840	+	exon	ENSMUSG00000021767		-	-	454.199		-	-	-		-	790.793	-	ciri_circ_5678,find_circ_5305
circ_5309	chr17	74829492	74840464	+	exon	ENSMUSG00000024078		-	-	681.298		-	-	-		1123.7	-	-	ciri_circ_5826,find_circ_5309
circ_5331	chr14	103314299	103323745	-	exon	ENSMUSG00000033004		-	-	454.199		370.374	-	-		-	-	-	ciri_circ_1076,find_circ_5331
circ_5347	chr13	98789363	98789873	-	exon	ENSMUSG00000041685		-	-	681.298		-	-	-		-	-	477.102	ciri_circ_5656,find_circ_5347
circ_5349	chr14	118627452	118632187	-	exon	ENSMUSG00000032849		-	-	681.298		-	-	-		-	-	715.652	ciri_circ_5718,find_circ_5349
circ_5354	chr11	93905159	93926326	+	exon	ENSMUSG00000059474		-	-	454.199		370.374	-	-		-	-	-	ciri_circ_5556,find_circ_5354
circ_5360	chr2	77089070	77170607	-	exon	ENSMUSG00000044033		-	-	454.199		-	-	-		561.851	-	-	ciri_circ_5943,find_circ_5360
circ_5361	chr8	110976429	111008311	-	intergenic region	n/a		-	-	3633.59		-	-	-		5056.66	-	-	ciri_circ_10159,find_circ_5361
circ_5366	chr5	21683156	21683465	-	exon	ENSMUSG00000044968		-	-	454.199		370.374	-	-		-	-	-	ciri_circ_6118,find_circ_5366
circ_5381	chr4	103319022	103319528	+	exon	ENSMUSG00000035069		-	-	454.199		-	-	-		-	527.195	-	ciri_circ_10033,find_circ_5381
circ_5384	chr5	122800451	122818004	-	exon	ENSMUSG00000029472		-	-	908.397		-	1005.64	-		-	-	-	ciri_circ_6167,find_circ_5384
circ_5386	chr16	20338876	20357558	-	exon	ENSMUSG00000022822		-	-	681.298		740.749	-	-		-	-	-	ciri_circ_1287,find_circ_5386
circ_5389	chr11	62419598	62423067	-	exon	ENSMUSG00000018501		-	-	681.298		-	402.254	-		-	-	-	ciri_circ_5535,find_circ_5389
circ_5397	chr6	115439840	115463285	+	exon	ENSMUSG00000000440		-	-	454.199		370.374	-	-		-	-	-	ciri_circ_6230,find_circ_5397
circ_5402	chr19	11923387	11925226	+	exon	ENSMUSG00000046139		-	-	454.199		555.562	-	-		-	-	-	ciri_circ_5878,find_circ_5402
circ_5403	chr15	38672857	38676113	+	exon	ENSMUSG00000022295		-	-	454.199		-	-	-		-	527.195	-	ciri_circ_6825,find_circ_5403
circ_5404	chr13	113922247	113967790	+	exon	ENSMUSG00000042348		-	-	454.199		370.374	-	-		-	-	-	ciri_circ_5663,find_circ_5404
circ_5411	chr8	33834304	33866404	-	exon	ENSMUSG00000031586		-	-	454.199		-	-	587.917		-	-	-	ciri_circ_3435,find_circ_5411
circ_5415	chr8	46103515	46124146	-	exon	ENSMUSG00000038291		-	-	454.199		-	-	587.917		-	-	-	ciri_circ_6312,find_circ_5415
circ_5434	chr2	101729424	101772408	-	exon	ENSMUSG00000032841		-	-	454.199		555.562	-	-		-	-	-	ciri_circ_7085,find_circ_5434
circ_5439	chr3	90132320	90137001	+	exon	ENSMUSG00000027939		-	-	454.199		-	-	-		842.777	-	-	ciri_circ_6018,find_circ_5439
circ_5454	chr5	96077118	96134132	-	exon	ENSMUSG00000034724		-	-	454.199		-	-	391.945		-	-	-	ciri_circ_6142,find_circ_5454
circ_5466	chr1	170156924	170166948	-	exon	ENSMUSG00000026670		-	-	454.199		-	-	391.945		-	-	-	ciri_circ_5434,find_circ_5466
circ_5482	chr2	142648428	142690701	-	exon	ENSMUSG00000038844		-	-	454.199		-	402.254	-		-	-	-	ciri_circ_4748,find_circ_5482
circ_5502	chrX	94098283	94102380	-	exon	ENSMUSG00000079509		-	-	-		1666.69	-	-		-	-	1192.75	ciri_circ_3838,find_circ_5502
circ_5528	chr3	66994517	67082709	+	exon	ENSMUSG00000034544		-	-	-		555.562	-	-		-	-	477.102	ciri_circ_7153,find_circ_5528
circ_5534	chr11	31055458	31085131	+	exon	ENSMUSG00000020305		-	-	-		370.374	402.254	-		-	-	-	ciri_circ_10252,find_circ_5534
circ_5545	chr9	52060832	52073284	+	exon	ENSMUSG00000032050		-	-	-		555.562	402.254	-		-	-	-	ciri_circ_6369,find_circ_5545
circ_5547	chr9	57086581	57089554	+	exon	ENSMUSG00000042557		-	-	-		370.374	402.254	-		-	-	-	ciri_circ_7543,find_circ_5547
circ_5549	chr6	136828020	136832128	-	exon	ENSMUSG00000047515		-	-	-		555.562	-	-		-	-	477.102	ciri_circ_7403,find_circ_5549
circ_5554	chr1	74585384	74585697	-	exon	ENSMUSG00000026135		-	-	-		555.562	-	-		-	-	477.102	ciri_circ_6474,find_circ_5554
circ_5561	chr19	38865616	38882774	+	exon	ENSMUSG00000048720		-	-	-		370.374	-	-		-	-	954.203	ciri_circ_9416,find_circ_5561
circ_5563	chr16	32950292	32959531	+	exon	ENSMUSG00000022801		-	-	-		370.374	-	-		-	-	477.102	ciri_circ_6868,find_circ_5563
circ_5575	chr12	3617606	3644022	+	exon	ENSMUSG00000071454		-	-	-		925.936	-	587.917		-	-	-	ciri_circ_634,find_circ_5575
circ_5576	chr6	134062032	134066465	+	intron	ENSMUSG00000030199		-	-	-		370.374	-	-		-	790.793	-	ciri_circ_7399,find_circ_5576
circ_5590	chr3	94870080	94871325	+	exon	ENSMUSG00000038902		-	-	-		370.374	-	-		-	-	715.652	ciri_circ_6019,find_circ_5590
circ_5591	chr8	45789976	45805853	+	exon	ENSMUSG00000031626		-	-	-		370.374	603.381	-		-	-	-	ciri_circ_3444,find_circ_5591
circ_5595	chr6	93745434	93747374	-	exon	ENSMUSG00000045095		-	-	-		370.374	-	-		-	-	477.102	ciri_circ_7380,find_circ_5595
circ_5597	chr17	46858436	46858698	-	intergenic region	n/a		-	-	-		555.562	402.254	-		-	-	-	ciri_circ_6924,find_circ_5597
circ_5608	chr16	20607764	20609086	-	exon	ENSMUSG00000033809		-	-	-		370.374	-	-		-	-	954.203	ciri_circ_6862,find_circ_5608
circ_5609	chr17	46961499	46976090	-	exon	ENSMUSG00000023977		-	-	-		370.374	-	-		-	527.195	-	ciri_circ_6925,find_circ_5609
circ_5624	chr17	24242140	24249405	-	exon	ENSMUSG00000072082		-	-	-		370.374	402.254	-		-	-	-	ciri_circ_6903,find_circ_5624
circ_5627	chr3	131579311	131585166	+	exon	ENSMUSG00000028032		-	-	-		555.562	402.254	-		-	-	-	ciri_circ_7183,find_circ_5627
circ_5647	chr17	65717482	65722087	-	exon	ENSMUSG00000056515		-	-	-		370.374	-	-		-	-	477.102	ciri_circ_1620,find_circ_5647
circ_5648	chr8	25735745	25749847	-	exon	ENSMUSG00000061313		-	-	-		370.374	-	391.945		-	-	-	ciri_circ_9077,find_circ_5648
circ_5657	chr2	18284623	18294044	-	exon	ENSMUSG00000026740		-	-	-		370.374	-	-		-	-	1431.3	ciri_circ_5905,find_circ_5657
circ_5660	chr11	49212695	49215390	+	exon	ENSMUSG00000046311		-	-	-		555.562	-	391.945		-	-	-	ciri_circ_4054,find_circ_5660
circ_5663	chr2	37399587	37414812	-	exon	ENSMUSG00000075376		-	-	-		370.374	-	-		-	527.195	-	ciri_circ_7049,find_circ_5663
circ_5664	chr15	99283814	99285665	-	exon	ENSMUSG00000078907		-	-	-		370.374	-	-		-	1317.99	-	ciri_circ_6851,find_circ_5664
circ_5675	chr19	23694321	23720354	+	exon	ENSMUSG00000074925		-	-	-		370.374	603.381	-		-	-	-	ciri_circ_6999,find_circ_5675
circ_5677	chr7	120895184	120899546	+	exon	ENSMUSG00000035064		-	-	-		555.562	-	-		-	-	477.102	ciri_circ_7454,find_circ_5677
circ_5680	chr11	86327802	86346028	-	exon	ENSMUSG00000034297		-	-	-		370.374	-	-		-	527.195	-	ciri_circ_6629,find_circ_5680
circ_5683	chr12	3496225	3496936	+	exon	ENSMUSG00000037486		-	-	-		370.374	-	391.945		-	-	-	ciri_circ_8602,find_circ_5683
circ_5684	chr5	48224653	48259683	+	exon	ENSMUSG00000031558		-	-	-		370.374	-	-		-	790.793	-	ciri_circ_7278,find_circ_5684
circ_5692	chr4	137556640	137557440	+	exon	ENSMUSG00000028763		-	-	-		740.749	402.254	-		-	-	-	ciri_circ_4904,find_circ_5692
circ_5703	chr7	132949585	132966694	+	exon	ENSMUSG00000030967		-	-	-		555.562	-	-		-	-	715.652	ciri_circ_7463,find_circ_5703
circ_5705	chr14	20520554	20531860	-	exon	ENSMUSG00000021816		-	-	-		555.562	-	783.89		-	-	-	ciri_circ_6745,find_circ_5705
circ_5716	chr16	18946346	18947518	+	exon	ENSMUSG00000099908		-	-	-		370.374	804.508	-		-	-	-	ciri_circ_4399,find_circ_5716
circ_5749	chr3	84527686	84548035	-	exon	ENSMUSG00000074513		-	-	-		555.562	-	-		-	-	477.102	ciri_circ_2336,find_circ_5749
circ_5750	chr18	5037108	5049494	+	exon	ENSMUSG00000024236		-	-	-		370.374	603.381	-		-	-	-	ciri_circ_8004,find_circ_5750
circ_5761	chr7	109911915	109919477	-	exon	ENSMUSG00000035901		-	-	-		370.374	-	587.917		-	-	-	ciri_circ_9055,find_circ_5761
circ_5762	chr10	83316055	83316789	-	exon	ENSMUSG00000034591		-	-	-		370.374	-	783.89		-	-	-	ciri_circ_4021,find_circ_5762
circ_5778	chr19	29533165	29541335	+	exon	ENSMUSG00000038658		-	-	-		370.374	-	-		-	-	477.102	ciri_circ_4610,find_circ_5778
circ_5782	chr2	155157774	155163483	+	exon	ENSMUSG00000027598		-	-	-		555.562	-	-		842.777	-	-	ciri_circ_7121,find_circ_5782
circ_5785	chr3	116681105	116694634	-	exon	ENSMUSG00000027957		-	-	-		370.374	402.254	-		-	-	-	ciri_circ_8163,find_circ_5785
circ_5791	chr13	55113036	55122515	+	exon	ENSMUSG00000021481		-	-	-		555.562	402.254	-		-	-	-	ciri_circ_6710,find_circ_5791
circ_5792	chr3	87913091	87914690	+	exon	ENSMUSG00000004897		-	-	-		370.374	-	-		-	527.195	-	ciri_circ_7157,find_circ_5792
circ_5796	chr5	123707269	123717058	-	exon	ENSMUSG00000029427		-	-	-		370.374	-	-		-	790.793	-	ciri_circ_2857,find_circ_5796
circ_5798	chr8	124870776	124874348	+	exon	ENSMUSG00000031985		-	-	-		370.374	-	-		-	-	477.102	ciri_circ_7508,find_circ_5798
circ_5811	chr10	28560005	28580547	+	exon	ENSMUSG00000019889		-	-	-		555.562	-	391.945		-	-	-	ciri_circ_6531,find_circ_5811
circ_5816	chr9	70301693	70327276	+	exon	ENSMUSG00000032220		-	-	-		370.374	-	-		-	-	477.102	ciri_circ_7560,find_circ_5816
circ_5830	chr12	34086713	34096074	+	intron	ENSMUSG00000004698		-	-	-		370.374	402.254	-		-	-	-	ciri_circ_656,find_circ_5830
circ_5833	chr9	108541688	108544977	+	exon	ENSMUSG00000006673		-	-	-		370.374	-	587.917		-	-	-	ciri_circ_7584,find_circ_5833
circ_5834	chr2	93806025	93813964	-	exon	ENSMUSG00000027198		-	-	-		370.374	-	-		-	527.195	-	ciri_circ_7084,find_circ_5834
circ_5837	chr12	8978598	8982894	+	exon	ENSMUSG00000066643		-	-	-		555.562	-	-		561.851	-	-	ciri_circ_6657,find_circ_5837
circ_5838	chr1	40003757	40010677	+	exon	ENSMUSG00000026074		-	-	-		555.562	402.254	-		-	-	-	ciri_circ_6460,find_circ_5838
circ_5839	chr13	93790039	93807703	+	exon	ENSMUSG00000042082		-	-	-		555.562	402.254	-		-	-	-	ciri_circ_5653,find_circ_5839
circ_5841	chr5	110741970	110756766	-	exon	ENSMUSG00000029505		-	-	-		740.749	-	391.945		-	-	-	ciri_circ_7310,find_circ_5841
circ_5842	chr15	7154387	7159521	+	exon	ENSMUSG00000054263		-	-	-		555.562	-	-		-	-	715.652	ciri_circ_6814,find_circ_5842
circ_5852	chr2	109131485	109150527	-	intron	ENSMUSG00000057234		-	-	-		370.374	-	-		561.851	-	-	ciri_circ_7090,find_circ_5852
circ_5860	chr10	62437434	62441246	-	exon	ENSMUSG00000020079		-	-	-		555.562	-	-		842.777	-	-	ciri_circ_5476,find_circ_5860
circ_5861	chr12	55770619	55795776	-	exon	ENSMUSG00000021027		-	-	-		370.374	402.254	-		-	-	-	ciri_circ_6671,find_circ_5861
circ_5863	chr5	96091584	96134132	-	exon	ENSMUSG00000034724		-	-	-		370.374	402.254	-		-	-	-	ciri_circ_7295,find_circ_5863
circ_5867	chr10	120165093	120182708	-	exon	ENSMUSG00000020227		-	-	-		370.374	-	391.945		-	-	-	ciri_circ_6574,find_circ_5867
circ_5873	chr17	34718818	34800727	+	intergenic region	n/a		-	-	-		1111.12	2212.4	-		-	-	-	ciri_circ_1517,find_circ_5873
circ_5882	chr1	153482742	153483872	-	exon	ENSMUSG00000042699		-	-	-		370.374	-	587.917		-	-	-	ciri_circ_8515,find_circ_5882
circ_5890	chr18	24002650	24004470	+	exon	ENSMUSG00000063281		-	-	-		370.374	402.254	-		-	-	-	ciri_circ_6958,find_circ_5890
circ_5900	chr9	80092267	80111453	+	exon	ENSMUSG00000034252		-	-	-		740.749	-	-		-	-	1192.75	ciri_circ_7567,find_circ_5900
circ_5902	chr9	110561116	110564668	+	exon	ENSMUSG00000044791		-	-	-		740.749	-	587.917		-	-	-	ciri_circ_7585,find_circ_5902
circ_5904	chr13	31901849	31925422	+	intron	ENSMUSG00000038372		-	-	-		370.374	-	1175.83		-	-	-	ciri_circ_6706,find_circ_5904
circ_5906	chr12	55776019	55795776	-	exon	ENSMUSG00000021027		-	-	-		370.374	402.254	-		-	-	-	ciri_circ_6672,find_circ_5906
circ_5909	chr3	97907221	97921245	+	exon	ENSMUSG00000027879		-	-	-		370.374	-	-		-	527.195	-	ciri_circ_4818,find_circ_5909
circ_5918	chr11	85326867	85339796	+	exon	ENSMUSG00000020525		-	-	-		555.562	-	-		-	790.793	-	ciri_circ_6627,find_circ_5918
circ_5922	chr6	93745434	93785646	-	exon	ENSMUSG00000045095		-	-	-		555.562	603.381	-		-	-	-	ciri_circ_7381,find_circ_5922
circ_5932	chr12	108980691	108992937	+	exon	ENSMUSG00000040877		-	-	-		370.374	-	-		-	527.195	-	ciri_circ_6689,find_circ_5932
circ_5945	chr2	116041939	116049198	-	exon	ENSMUSG00000027210		-	-	-		555.562	-	-		-	527.195	-	ciri_circ_7096,find_circ_5945
circ_5946	chr16	62827164	62830813	-	exon	ENSMUSG00000022911		-	-	-		555.562	-	-		-	527.195	-	ciri_circ_1319,find_circ_5946
circ_5948	chr17	36041449	36110135	-	intergenic region	n/a		-	-	-		1666.69	-	-		-	3163.17	-	ciri_circ_1570,find_circ_5948
circ_5949	chr3	86102890	86104347	+	exon	ENSMUSG00000028082		-	-	-		370.374	-	-		-	527.195	-	ciri_circ_6012,find_circ_5949
circ_5951	chr14	72589754	72683771	-	exon	ENSMUSG00000033487		-	-	-		555.562	-	-		-	790.793	-	ciri_circ_6790,find_circ_5951
circ_5957	chr11	107072683	107082700	-	exon	ENSMUSG00000040481		-	-	-		370.374	-	-		-	-	477.102	ciri_circ_9759,find_circ_5957
circ_5963	chr6	115632897	115644642	-	exon	ENSMUSG00000000441		-	-	-		1111.12	-	587.917		-	-	-	ciri_circ_3101,find_circ_5963
circ_5966	chr2	33324653	33340833	-	exon	ENSMUSG00000038831		-	-	-		740.749	-	-		-	527.195	-	ciri_circ_4676,find_circ_5966
circ_5970	chr2	148686514	148690983	+	exon	ENSMUSG00000027439		-	-	-		925.936	-	-		1685.55	-	-	ciri_circ_7116,find_circ_5970
circ_5974	chr6	17487797	17492437	+	exon	ENSMUSG00000009376		-	-	-		370.374	-	-		-	790.793	-	ciri_circ_2921,find_circ_5974
circ_5987	chr9	106716061	106722914	-	exon	ENSMUSG00000040661		-	-	-		555.562	-	-		-	-	715.652	ciri_circ_7579,find_circ_5987
circ_6003	chr19	36875264	36876373	+	exon	ENSMUSG00000024811		-	-	-		555.562	-	-		-	-	715.652	ciri_circ_7006,find_circ_6003
circ_6018	chr9	65999395	66032345	+	exon	ENSMUSG00000032384		-	-	-		370.374	-	391.945		-	-	-	ciri_circ_7556,find_circ_6018
circ_6020	chr14	121101989	121107403	+	intron	ENSMUSG00000025555		-	-	-		555.562	402.254	-		-	-	-	ciri_circ_6808,find_circ_6020
circ_6023	chr5	115283566	115284612	+	exon	ENSMUSG00000041733		-	-	-		370.374	-	-		-	527.195	-	ciri_circ_7312,find_circ_6023
circ_6044	chr9	41393194	41402263	+	exon	ENSMUSG00000074415		-	-	-		370.374	-	-		-	527.195	-	ciri_circ_3640,find_circ_6044
circ_6047	chr11	108012627	108014381	-	exon	ENSMUSG00000050965		-	-	-		740.749	402.254	-		-	-	-	ciri_circ_611,find_circ_6047
circ_6053	chr11	110301731	110310305	-	exon	ENSMUSG00000018800		-	-	-		370.374	402.254	-		-	-	-	ciri_circ_4117,find_circ_6053
circ_6055	chr2	69914414	69922933	+	exon	ENSMUSG00000044308		-	-	-		740.749	-	-		-	790.793	-	ciri_circ_2075,find_circ_6055
circ_6068	chr19	9004280	9004440	+	exon	ENSMUSG00000069833		-	-	-		1111.12	-	-		561.851	-	-	ciri_circ_6993,find_circ_6068
circ_6077	chr9	22812321	22887996	+	exon	ENSMUSG00000035919		-	-	-		370.374	-	587.917		-	-	-	ciri_circ_7526,find_circ_6077
circ_6079	chr11	70874746	70900607	+	exon	ENSMUSG00000020817		-	-	-		370.374	-	-		-	527.195	-	ciri_circ_9221,find_circ_6079
circ_6084	chr5	29252743	29292949	-	exon	ENSMUSG00000010721		-	-	-		370.374	402.254	-		-	-	-	ciri_circ_6122,find_circ_6084
circ_6099	chr8	77310731	77384796	-	exon	ENSMUSG00000037148		-	-	-		370.374	804.508	-		-	-	-	ciri_circ_3485,find_circ_6099
circ_6110	chr7	44105872	44191648	+	intergenic region	n/a		-	-	-		555.562	603.381	-		-	-	-	ciri_circ_3223,find_circ_6110
circ_6113	chr8	86641542	86673069	+	exon	ENSMUSG00000047866		-	-	-		370.374	-	-		-	1317.99	-	ciri_circ_11323,find_circ_6113
circ_6118	chr1	140507700	140533995	+	exon	ENSMUSG00000052726		-	-	-		370.374	-	391.945		-	-	-	ciri_circ_8512,find_circ_6118
circ_6119	chr6	29568854	29575152	-	exon	ENSMUSG00000012535		-	-	-		370.374	-	-		-	527.195	-	ciri_circ_7350,find_circ_6119
circ_6123	chr7	73490479	73491424	-	exon	ENSMUSG00000078671		-	-	-		370.374	-	-		-	-	715.652	ciri_circ_6274,find_circ_6123
circ_6126	chr9	71546669	71552364	-	exon	ENSMUSG00000092137		-	-	-		370.374	-	-		-	-	715.652	ciri_circ_7562,find_circ_6126
circ_6129	chr14	47064220	47096174	+	exon	ENSMUSG00000021838		-	-	-		370.374	-	391.945		-	-	-	ciri_circ_1006,find_circ_6129
circ_6143	chr5	121607360	121629991	-	intergenic region	n/a		-	-	-		555.562	1206.76	-		-	-	-	ciri_circ_8258,find_circ_6143
circ_6148	chr18	80844527	80917878	-	exon	ENSMUSG00000024566		-	-	-		370.374	603.381	-		-	-	-	ciri_circ_5870,find_circ_6148
circ_6156	chr6	70884770	70890214	+	exon	ENSMUSG00000031668		-	-	-		370.374	-	-		-	527.195	-	ciri_circ_7363,find_circ_6156
circ_6161	chr1	91384565	91385346	-	exon	ENSMUSG00000026309		-	-	-		740.749	-	391.945		-	-	-	ciri_circ_86,find_circ_6161
circ_6169	chr5	122591080	122594688	-	exon	ENSMUSG00000029469		-	-	-		740.749	-	-		561.851	-	-	ciri_circ_2852,find_circ_6169
circ_6184	chr11	3164557	3193904	-	intergenic region	n/a		-	-	-		555.562	603.381	-		-	-	-	ciri_circ_6580,find_circ_6184
circ_6189	chr17	6016266	6019478	+	exon	ENSMUSG00000023805		-	-	-		740.749	804.508	-		-	-	-	ciri_circ_5782,find_circ_6189
circ_6192	chr3	89001773	89026506	+	exon	ENSMUSG00000028053		-	-	-		370.374	-	-		-	527.195	-	ciri_circ_7161,find_circ_6192
circ_6194	chr11	8443935	8453250	-	exon	ENSMUSG00000020422		-	-	-		370.374	402.254	-		-	-	-	ciri_circ_6587,find_circ_6194
circ_6198	chr14	48240210	48252765	+	exon	ENSMUSG00000021846		-	-	-		370.374	-	391.945		-	-	-	ciri_circ_6769,find_circ_6198
circ_6206	chr3	57764257	57779508	+	exon	ENSMUSG00000036503		-	-	-		370.374	-	391.945		-	-	-	ciri_circ_8882,find_circ_6206
circ_6207	chr19	42562552	42583543	+	exon	ENSMUSG00000025184		-	-	-		370.374	402.254	-		-	-	-	ciri_circ_5887,find_circ_6207
circ_6210	chr9	53582481	53592111	-	exon	ENSMUSG00000032047		-	-	-		370.374	-	-		-	527.195	-	ciri_circ_11337,find_circ_6210
circ_6225	chr3	88161191	88163087	+	exon	ENSMUSG00000001419		-	-	-		370.374	-	783.89		-	-	-	ciri_circ_7158,find_circ_6225
circ_6234	chr11	62419598	62438515	-	exon	ENSMUSG00000018501		-	-	-		370.374	-	-		-	527.195	-	ciri_circ_6615,find_circ_6234
circ_6235	chr9	46123217	46155540	+	exon	ENSMUSG00000034135		-	-	-		370.374	603.381	-		-	-	-	ciri_circ_7538,find_circ_6235
circ_6237	chr2	118631759	118635277	+	exon	ENSMUSG00000040084		-	-	-		740.749	-	-		-	527.195	-	ciri_circ_7102,find_circ_6237
circ_6239	chr9	54897487	54904237	+	exon	ENSMUSG00000032293		-	-	-		370.374	-	-		-	-	477.102	ciri_circ_11739,find_circ_6239
circ_6246	chr13	94528165	94532066	+	exon	ENSMUSG00000021686		-	-	-		370.374	-	-		-	527.195	-	ciri_circ_6731,find_circ_6246
circ_6254	chr12	69603476	69610826	-	exon	ENSMUSG00000034801		-	-	-		370.374	-	-		-	527.195	-	ciri_circ_6673,find_circ_6254
circ_6256	chr2	155292690	155314599	-	exon	ENSMUSG00000038383		-	-	-		370.374	-	-		-	-	715.652	ciri_circ_7122,find_circ_6256
circ_6258	chr6	31181022	31197851	-	exon	ENSMUSG00000044471		-	-	-		370.374	-	-		-	-	477.102	ciri_circ_2957,find_circ_6258
circ_6262	chr3	88699951	88700514	+	exon	ENSMUSG00000028060		-	-	-		370.374	603.381	-		-	-	-	ciri_circ_2354,find_circ_6262
circ_6268	chr16	11230510	11239099	-	exon	ENSMUSG00000062203		-	-	-		370.374	-	-		-	-	1192.75	ciri_circ_9852,find_circ_6268
circ_6284	chr12	104503902	104504376	+	intergenic region	n/a		-	-	-		740.749	-	-		-	527.195	-	ciri_circ_6686,find_circ_6284
circ_6287	chr16	5097645	5102678	-	exon	ENSMUSG00000039457		-	-	-		555.562	402.254	-		-	-	-	ciri_circ_6857,find_circ_6287
circ_6290	chr4	83535790	83580894	+	exon	ENSMUSG00000052407		-	-	-		555.562	-	391.945		-	-	-	ciri_circ_7220,find_circ_6290
circ_6300	chr6	29366040	29372670	+	exon	ENSMUSG00000029767		-	-	-		555.562	-	-		-	-	477.102	ciri_circ_7349,find_circ_6300
circ_6303	chr5	100405444	100408113	-	exon	ENSMUSG00000035325		-	-	-		370.374	-	-		561.851	-	-	ciri_circ_7297,find_circ_6303
circ_6305	chr1	173912814	173977434	-	intergenic region	n/a		-	-	-		740.749	-	-		-	-	477.102	ciri_circ_169,find_circ_6305
circ_6306	chr7	81885886	81905636	-	exon	ENSMUSG00000025104		-	-	-		370.374	-	391.945		-	-	-	ciri_circ_9048,find_circ_6306
circ_6307	chr5	105891118	105911508	+	exon	ENSMUSG00000029290		-	-	-		370.374	804.508	-		-	-	-	ciri_circ_7303,find_circ_6307
circ_6311	chr1	58480960	58501890	-	exon	ENSMUSG00000026037		-	-	-		370.374	-	-		561.851	-	-	ciri_circ_6467,find_circ_6311
circ_6312	chr5	140295787	140303697	-	exon	ENSMUSG00000029554		-	-	-		925.936	-	-		-	-	477.102	ciri_circ_2882,find_circ_6312
circ_6316	chr18	80836355	80917878	-	exon	ENSMUSG00000024566		-	-	-		370.374	-	-		-	-	477.102	ciri_circ_6983,find_circ_6316
circ_6320	chr2	29166268	29171350	+	exon	ENSMUSG00000043535		-	-	-		370.374	-	-		-	-	477.102	ciri_circ_7039,find_circ_6320
circ_6324	chr3	88825390	88899074	+	intergenic region	n/a		-	-	-		2407.43	-	-		3932.96	-	-	ciri_circ_2374,find_circ_6324
circ_6341	chr10	4856858	4857193	+	exon	ENSMUSG00000019768		-	-	-		370.374	-	-		-	527.195	-	ciri_circ_6522,find_circ_6341
circ_6344	chr6	11959929	11962789	+	intron	ENSMUSG00000029629		-	-	-		740.749	-	391.945		-	-	-	ciri_circ_7344,find_circ_6344
circ_6352	chr19	5801899	5802303	-	exon	ENSMUSG00000092341		-	-	-		370.374	-	-		-	527.195	-	ciri_circ_6990,find_circ_6352
circ_6357	chr13	6103850	6109295	+	intergenic region	n/a		-	-	-		555.562	-	587.917		-	-	-	ciri_circ_812,find_circ_6357
circ_6362	chr3	41581195	41604991	+	exon	ENSMUSG00000025764		-	-	-		370.374	402.254	-		-	-	-	ciri_circ_7143,find_circ_6362
circ_6367	chr4	140562714	140570402	-	exon	ENSMUSG00000040964		-	-	-		370.374	-	-		-	527.195	-	ciri_circ_7252,find_circ_6367
circ_6379	chr2	179921152	179939954	-	exon	ENSMUSG00000039117		-	-	-		370.374	804.508	-		-	-	-	ciri_circ_2272,find_circ_6379
circ_6381	chr5	74545412	74557149	+	exon	ENSMUSG00000029227		-	-	-		370.374	402.254	-		-	-	-	ciri_circ_7288,find_circ_6381
circ_6407	chr12	3237285	3238112	+	exon	ENSMUSG00000079179		-	-	-		370.374	-	-		561.851	-	-	ciri_circ_6649,find_circ_6407
circ_6432	chr17	13803939	13823458	+	exon	ENSMUSG00000068036		-	-	-		370.374	-	-		-	527.195	-	ciri_circ_6881,find_circ_6432
circ_6437	chr13	31899692	31903266	+	intron	ENSMUSG00000038372		-	-	-		370.374	402.254	-		-	-	-	ciri_circ_6705,find_circ_6437
circ_6442	chr2	59646769	59724849	+	exon	ENSMUSG00000035168		-	-	-		925.936	-	-		842.777	-	-	ciri_circ_7063,find_circ_6442
circ_6450	chr9	72725017	72726530	+	exon	ENSMUSG00000032216		-	-	-		370.374	-	-		-	-	715.652	ciri_circ_10968,find_circ_6450
circ_6460	chr5	124395895	124398509	-	exon	ENSMUSG00000038095		-	-	-		555.562	-	-		-	-	715.652	ciri_circ_7319,find_circ_6460
circ_6466	chr7	87321546	87339017	+	exon	ENSMUSG00000030562		-	-	-		370.374	-	-		561.851	-	-	ciri_circ_9050,find_circ_6466
circ_6474	chr5	134289287	134295613	-	exon	ENSMUSG00000060261		-	-	-		370.374	-	587.917		-	-	-	ciri_circ_8980,find_circ_6474
circ_6479	chr2	24806214	24838868	-	exon	ENSMUSG00000036893		-	-	-		370.374	-	-		-	-	477.102	ciri_circ_7033,find_circ_6479
circ_6480	chr14	86810336	86852201	-	exon	ENSMUSG00000022021		-	-	-		555.562	402.254	-		-	-	-	ciri_circ_6800,find_circ_6480
circ_6485	chr5	124378470	124387589	-	exon	ENSMUSG00000038095		-	-	-		370.374	-	391.945		-	-	-	ciri_circ_6170,find_circ_6485
circ_6487	chr7	130663016	130674739	+	exon	ENSMUSG00000030852		-	-	-		370.374	-	-		-	1054.39	-	ciri_circ_7460,find_circ_6487
circ_6490	chr16	43577030	43577748	+	exon	ENSMUSG00000022708		-	-	-		370.374	-	-		561.851	-	-	ciri_circ_6872,find_circ_6490
circ_6492	chr6	85641319	85656529	+	exon	ENSMUSG00000063810		-	-	-		370.374	-	-		-	-	715.652	ciri_circ_7370,find_circ_6492
circ_6507	chr3	126796838	126798280	+	exon	ENSMUSG00000053819		-	-	-		555.562	402.254	-		-	-	-	ciri_circ_2435,find_circ_6507
circ_6510	chr17	79650302	79651801	+	exon	ENSMUSG00000036368		-	-	-		370.374	603.381	-		-	-	-	ciri_circ_7998,find_circ_6510
circ_6528	chr4	150395209	150406664	+	intron	ENSMUSG00000039852		-	-	-		555.562	-	-		-	-	477.102	ciri_circ_6107,find_circ_6528
circ_6532	chr9	9035509	9059159	-	exon	ENSMUSG00000050730		-	-	-		370.374	-	-		-	527.195	-	ciri_circ_7518,find_circ_6532
circ_6534	chr3	104652742	104653587	+	exon	ENSMUSG00000032902		-	-	-		370.374	-	-		-	790.793	-	ciri_circ_11216,find_circ_6534
circ_6538	chr11	22799378	22801102	-	intron	ENSMUSG00000101716		-	-	-		370.374	-	783.89		-	-	-	ciri_circ_429,find_circ_6538
circ_6539	chr18	6448905	6455334	-	exon	ENSMUSG00000024240		-	-	-		555.562	-	-		561.851	-	-	ciri_circ_6951,find_circ_6539
circ_6553	chr8	106179102	106179660	+	exon	ENSMUSG00000031904		-	-	-		370.374	-	-		-	-	477.102	ciri_circ_7499,find_circ_6553
circ_6554	chr6	38804131	38819313	-	intron	ENSMUSG00000061436		-	-	-		555.562	-	587.917		-	-	-	ciri_circ_2992,find_circ_6554
circ_6569	chr4	98014213	98041679	+	exon	ENSMUSG00000028565		-	-	-		370.374	-	587.917		-	-	-	ciri_circ_7229,find_circ_6569
circ_6582	chr8	84713766	84772315	-	exon	ENSMUSG00000001911		-	-	-		370.374	-	-		-	-	477.102	ciri_circ_11721,find_circ_6582
circ_6586	chr11	62410820	62433699	-	exon	ENSMUSG00000018501		-	-	-		370.374	-	391.945		-	-	-	ciri_circ_6614,find_circ_6586
circ_6590	chr9	40760901	40774485	+	exon	ENSMUSG00000032024		-	-	-		555.562	-	-		-	527.195	-	ciri_circ_5272,find_circ_6590
circ_6594	chr3	88981233	88985790	+	exon	ENSMUSG00000028053		-	-	-		370.374	402.254	-		-	-	-	ciri_circ_7160,find_circ_6594
circ_6595	chr5	110673109	110676938	-	exon	ENSMUSG00000029505		-	-	-		370.374	-	-		561.851	-	-	ciri_circ_4968,find_circ_6595
circ_6601	chrX	98640908	98644994	-	exon	ENSMUSG00000031214		-	-	-		555.562	-	-		-	527.195	-	ciri_circ_5364,find_circ_6601
circ_6612	chr1	106000931	106023758	+	exon	ENSMUSG00000038866		-	-	-		555.562	-	-		-	527.195	-	ciri_circ_6488,find_circ_6612
circ_6614	chr14	7907153	7915384	+	exon	ENSMUSG00000025278		-	-	-		370.374	-	-		-	527.195	-	ciri_circ_6741,find_circ_6614
circ_6618	chr17	24091421	24100908	-	exon	ENSMUSG00000024122		-	-	-		370.374	-	-		-	-	477.102	ciri_circ_6901,find_circ_6618
circ_6622	chr17	63921613	63941480	+	exon	ENSMUSG00000000127		-	-	-		740.749	402.254	-		-	-	-	ciri_circ_6930,find_circ_6622
circ_6629	chrX	109129301	109154386	+	exon	ENSMUSG00000031246		-	-	-		370.374	-	391.945		-	-	-	ciri_circ_6437,find_circ_6629
circ_6631	chr7	89955531	89964862	-	exon	ENSMUSG00000030619		-	-	-		370.374	-	391.945		-	-	-	ciri_circ_3277,find_circ_6631
circ_6633	chr10	83313415	83316789	-	exon	ENSMUSG00000034591		-	-	-		370.374	-	587.917		-	-	-	ciri_circ_332,find_circ_6633
circ_6639	chr17	78302987	78315746	+	exon	ENSMUSG00000024074		-	-	-		925.936	-	-		-	-	477.102	ciri_circ_6939,find_circ_6639
circ_6641	chr11	86345860	86355508	-	exon	ENSMUSG00000034297		-	-	-		555.562	-	-		-	-	477.102	ciri_circ_11411,find_circ_6641
circ_6647	chr5	21455782	21459293	+	exon	ENSMUSG00000047221		-	-	-		925.936	-	-		-	527.195	-	ciri_circ_7270,find_circ_6647
circ_6655	chr5	137653763	137655728	-	exon	ENSMUSG00000029722		-	-	-		555.562	-	391.945		-	-	-	ciri_circ_7329,find_circ_6655
circ_6656	chr11	97218508	97224793	-	exon	ENSMUSG00000001441		-	-	-		370.374	-	-		-	790.793	-	ciri_circ_6635,find_circ_6656
circ_6657	chr9	58623687	58640802	+	exon	ENSMUSG00000032336		-	-	-		740.749	-	-		-	790.793	-	ciri_circ_7544,find_circ_6657
circ_6660	chr1	43990511	43992394	+	exon	ENSMUSG00000041763		-	-	-		555.562	-	-		561.851	-	-	ciri_circ_6462,find_circ_6660
circ_6681	chr13	75892906	75913454	-	exon	ENSMUSG00000021589		-	-	-		370.374	-	-		-	527.195	-	ciri_circ_904,find_circ_6681
circ_6682	chr19	24727669	24733677	-	exon	ENSMUSG00000041731		-	-	-		740.749	-	-		842.777	-	-	ciri_circ_1852,find_circ_6682
circ_6689	chr3	103038692	103041242	+	exon	ENSMUSG00000068823		-	-	-		370.374	-	391.945		-	-	-	ciri_circ_4822,find_circ_6689
circ_6692	chr17	74579165	74580562	+	exon	ENSMUSG00000024073		-	-	-		555.562	-	-		-	-	477.102	ciri_circ_6934,find_circ_6692
circ_6711	chr9	122925008	122926454	+	exon	ENSMUSG00000057895		-	-	-		555.562	-	391.945		-	-	-	ciri_circ_7591,find_circ_6711
circ_6712	chr5	40623699	40687854	-	intergenic region	n/a		-	-	-		370.374	402.254	-		-	-	-	ciri_circ_7275,find_circ_6712
circ_6717	chr14	31040433	31052321	+	exon	ENSMUSG00000042323		-	-	-		370.374	-	-		-	-	477.102	ciri_circ_6755,find_circ_6717
circ_6737	chr12	111776812	111778700	+	exon	ENSMUSG00000021288		-	-	-		-	402.254	-		842.777	-	-	ciri_circ_9268,find_circ_6737
circ_6747	chr18	76286860	76304776	+	exon	ENSMUSG00000024563		-	-	-		-	402.254	-		-	-	477.102	ciri_circ_5867,find_circ_6747
circ_6781	chr7	129618626	129620493	+	exon	ENSMUSG00000042055		-	-	-		-	402.254	391.945		-	-	-	ciri_circ_8364,find_circ_6781
circ_6783	chr17	78237742	78237915	+	exon	ENSMUSG00000024074		-	-	-		-	603.381	-		842.777	-	-	ciri_circ_7995,find_circ_6783
circ_6784	chr6	149166806	149183538	-	exon	ENSMUSG00000068250		-	-	-		-	804.508	-		-	790.793	-	ciri_circ_8331,find_circ_6784
circ_6785	chr6	65052620	65058132	+	exon	ENSMUSG00000029920		-	-	-		-	402.254	-		-	-	715.652	ciri_circ_3019,find_circ_6785
circ_6789	chr11	80557434	80586960	-	exon	ENSMUSG00000035441		-	-	-		-	402.254	-		-	790.793	-	ciri_circ_7767,find_circ_6789
circ_6791	chr11	95363999	95375763	+	exon	ENSMUSG00000038893		-	-	-		-	402.254	-		-	-	477.102	ciri_circ_7773,find_circ_6791
circ_6803	chr15	80901884	80902712	+	exon	ENSMUSG00000047888		-	-	-		-	402.254	391.945		-	-	-	ciri_circ_7912,find_circ_6803
circ_6806	chr3	94870080	94872427	+	exon	ENSMUSG00000038902		-	-	-		-	402.254	-		-	-	477.102	ciri_circ_4813,find_circ_6806
circ_6808	chr6	119694571	119773901	-	exon	ENSMUSG00000030172		-	-	-		-	402.254	979.862		-	-	-	ciri_circ_8318,find_circ_6808
circ_6812	chr6	83965529	83969239	+	exon	ENSMUSG00000030016		-	-	-		-	402.254	391.945		-	-	-	ciri_circ_8300,find_circ_6812
circ_6818	chr3	127724375	127729501	-	exon	ENSMUSG00000028028		-	-	-		-	402.254	-		-	-	715.652	ciri_circ_8165,find_circ_6818
circ_6830	chr10	25441573	25495591	+	exon	ENSMUSG00000019978		-	-	-		-	402.254	-		561.851	-	-	ciri_circ_10654,find_circ_6830
circ_6842	chr16	48972222	48984635	-	exon	ENSMUSG00000064061		-	-	-		-	402.254	-		-	-	477.102	ciri_circ_4412,find_circ_6842
circ_6853	chr19	16635769	16668701	-	exon	ENSMUSG00000046230		-	-	-		-	603.381	-		-	-	715.652	ciri_circ_8034,find_circ_6853
circ_6854	chrX	130047325	130088766	+	exon	ENSMUSG00000034480		-	-	-		-	402.254	-		561.851	-	-	ciri_circ_8469,find_circ_6854
circ_6857	chr2	18889052	18908152	-	exon	ENSMUSG00000026737		-	-	-		-	603.381	587.917		-	-	-	ciri_circ_1990,find_circ_6857
circ_6861	chr7	110052711	110054116	+	exon	ENSMUSG00000066232		-	-	-		-	603.381	-		842.777	-	-	ciri_circ_8353,find_circ_6861
circ_6872	chrX	93461369	93518554	-	intron	ENSMUSG00000006678		-	-	-		-	402.254	391.945		-	-	-	ciri_circ_8467,find_circ_6872
circ_6874	chrX	70461094	70470294	-	exon	ENSMUSG00000073139		-	-	-		-	402.254	-		561.851	-	-	ciri_circ_8464,find_circ_6874
circ_6876	chr15	81430690	81438180	+	exon	ENSMUSG00000022401		-	-	-		-	402.254	-		-	-	477.102	ciri_circ_7915,find_circ_6876
circ_6892	chr9	115276704	115280519	-	exon	ENSMUSG00000032437		-	-	-		-	402.254	-		-	527.195	-	ciri_circ_3781,find_circ_6892
circ_6893	chr4	116751105	116792234	+	exon	ENSMUSG00000033985		-	-	-		-	402.254	391.945		-	-	-	ciri_circ_8213,find_circ_6893
circ_6900	chrX	151547395	151550991	+	exon	ENSMUSG00000041229		-	-	-		-	402.254	-		-	-	477.102	ciri_circ_8476,find_circ_6900
circ_6908	chr17	6137211	6207057	+	exon	ENSMUSG00000034377		-	-	-		-	804.508	-		-	-	477.102	ciri_circ_5783,find_circ_6908
circ_6919	chr6	119743288	119773901	-	exon	ENSMUSG00000030172		-	-	-		-	1005.64	-		-	1317.99	-	ciri_circ_8319,find_circ_6919
circ_6923	chr11	78013171	78018229	+	exon	ENSMUSG00000037791		-	-	-		-	603.381	-		-	-	477.102	ciri_circ_7762,find_circ_6923
circ_6926	chr5	3515454	3520972	+	exon	ENSMUSG00000040274		-	-	-		-	402.254	-		-	527.195	-	ciri_circ_8230,find_circ_6926
circ_6944	chr14	87457034	87487287	+	exon	ENSMUSG00000022019		-	-	-		-	402.254	-		561.851	-	-	ciri_circ_4316,find_circ_6944
circ_6945	chr2	92221472	92230724	+	exon	ENSMUSG00000058318		-	-	-		-	402.254	587.917		-	-	-	ciri_circ_7082,find_circ_6945
circ_6959	chr11	117733610	117740009	+	exon	ENSMUSG00000025571		-	-	-		-	402.254	-		-	-	477.102	ciri_circ_7782,find_circ_6959
circ_6963	chr12	111336026	111345623	-	exon	ENSMUSG00000021279		-	-	-		-	402.254	-		-	790.793	-	ciri_circ_4195,find_circ_6963
circ_6965	chr2	112404161	112412893	+	exon	ENSMUSG00000027132		-	-	-		-	402.254	587.917		-	-	-	ciri_circ_2135,find_circ_6965
circ_6985	chr18	77097249	77097723	+	exon	ENSMUSG00000025423		-	-	-		-	402.254	391.945		-	-	-	ciri_circ_8024,find_circ_6985
circ_7008	chr10	43989094	43999347	-	exon	ENSMUSG00000019866		-	-	-		-	402.254	-		-	790.793	-	ciri_circ_9716,find_circ_7008
circ_7028	chr14	61603676	61643455	-	exon	ENSMUSG00000097589		-	-	-		-	804.508	587.917		-	-	-	ciri_circ_7874,find_circ_7028
circ_7033	chr1	11181855	11231796	+	exon	ENSMUSG00000048960		-	-	-		-	402.254	783.89		-	-	-	ciri_circ_8490,find_circ_7033
circ_7053	chr4	141692255	141698858	-	exon	ENSMUSG00000078515		-	-	-		-	402.254	-		561.851	-	-	ciri_circ_10886,find_circ_7053
circ_7063	chr15	32568712	32575020	+	exon	ENSMUSG00000022231		-	-	-		-	402.254	587.917		-	-	-	ciri_circ_8691,find_circ_7063
circ_7067	chr2	116000131	116002672	-	intron	ENSMUSG00000027210		-	-	-		-	402.254	-		-	527.195	-	ciri_circ_8100,find_circ_7067
circ_7070	chr10	21345077	21354743	+	exon	ENSMUSG00000019977		-	-	-		-	402.254	-		561.851	-	-	ciri_circ_9713,find_circ_7070
circ_7074	chr16	76330746	76352546	-	exon	ENSMUSG00000048490		-	-	-		-	402.254	-		-	527.195	-	ciri_circ_4419,find_circ_7074
circ_7088	chr14	99133236	99179480	+	exon	ENSMUSG00000022064		-	-	-		-	402.254	-		561.851	-	-	ciri_circ_7886,find_circ_7088
circ_7094	chr15	80923458	80924156	+	exon	ENSMUSG00000047888		-	-	-		-	402.254	391.945		-	-	-	ciri_circ_4367,find_circ_7094
circ_7100	chr16	31805614	31812824	+	exon	ENSMUSG00000022770		-	-	-		-	402.254	391.945		-	-	-	ciri_circ_7934,find_circ_7100
circ_7111	chr11	65706984	65735366	-	exon	ENSMUSG00000033352		-	-	-		-	603.381	-		842.777	-	-	ciri_circ_7757,find_circ_7111
circ_7131	chr17	64710704	64740883	+	exon	ENSMUSG00000024085		-	-	-		-	402.254	587.917		-	-	-	ciri_circ_8752,find_circ_7131
circ_7144	chr13	17738917	17766606	-	exon	ENSMUSG00000041297		-	-	-		-	603.381	-		-	790.793	-	ciri_circ_7822,find_circ_7144
circ_7145	chr9	54595166	54596189	+	exon	ENSMUSG00000032279		-	-	-		-	402.254	587.917		-	-	-	ciri_circ_9114,find_circ_7145
circ_7149	chr6	37953494	37958694	+	exon	ENSMUSG00000029833		-	-	-		-	402.254	-		-	-	715.652	ciri_circ_8284,find_circ_7149
circ_7152	chr7	130961513	130962177	+	exon	ENSMUSG00000006205		-	-	-		-	603.381	-		-	-	477.102	ciri_circ_8367,find_circ_7152
circ_7163	chr8	13136796	13142598	+	exon	ENSMUSG00000031446		-	-	-		-	804.508	-		561.851	-	-	ciri_circ_3405,find_circ_7163
circ_7167	chr4	56899026	56910247	-	exon	ENSMUSG00000055296		-	-	-		-	402.254	-		-	-	477.102	ciri_circ_8195,find_circ_7167
circ_7179	chr4	53107006	53133015	-	exon	ENSMUSG00000015243		-	-	-		-	603.381	391.945		-	-	-	ciri_circ_8193,find_circ_7179
circ_7180	chr9	6288472	6337441	+	exon	ENSMUSG00000032006		-	-	-		-	402.254	-		561.851	-	-	ciri_circ_8406,find_circ_7180
circ_7185	chr4	134909613	134913261	-	exon	ENSMUSG00000028822		-	-	-		-	603.381	391.945		-	-	-	ciri_circ_8220,find_circ_7185
circ_7213	chr6	134479509	134486671	-	exon	ENSMUSG00000030201		-	-	-		-	402.254	391.945		-	-	-	ciri_circ_8327,find_circ_7213
circ_7223	chr2	157101721	157106323	-	exon	ENSMUSG00000027639		-	-	-		-	402.254	391.945		-	-	-	ciri_circ_8127,find_circ_7223
circ_7242	chr15	32269683	32271475	+	intron	ENSMUSG00000022231		-	-	-		-	603.381	979.862		-	-	-	ciri_circ_1132,find_circ_7242
circ_7253	chr3	145845705	145853276	+	exon	ENSMUSG00000028194		-	-	-		-	402.254	-		-	527.195	-	ciri_circ_2476,find_circ_7253
circ_7294	chr9	59426123	59436915	-	exon	ENSMUSG00000025234		-	-	-		-	603.381	-		561.851	-	-	ciri_circ_3667,find_circ_7294
circ_7296	chr17	28410510	28441053	-	exon	ENSMUSG00000024222		-	-	-		-	603.381	587.917		-	-	-	ciri_circ_1487,find_circ_7296
circ_7302	chr4	106400971	106404068	+	exon	ENSMUSG00000028514		-	-	-		-	402.254	783.89		-	-	-	ciri_circ_4881,find_circ_7302
circ_7304	chr14	50951404	50963869	+	intron	ENSMUSG00000021871		-	-	-		-	1005.64	979.862		-	-	-	ciri_circ_1013,find_circ_7304
circ_7305	chr7	130418448	130516168	-	exon	ENSMUSG00000030850		-	-	-		-	402.254	587.917		-	-	-	ciri_circ_8366,find_circ_7305
circ_7308	chr13	95186055	95186523	-	intron	ENSMUSG00000021684		-	-	-		-	603.381	-		-	527.195	-	ciri_circ_922,find_circ_7308
circ_7310	chr2	142834077	142850006	-	exon	ENSMUSG00000038844		-	-	-		-	402.254	391.945		-	-	-	ciri_circ_2207,find_circ_7310
circ_7312	chr3	88910314	88910810	-	exon	ENSMUSG00000068922		-	-	-		-	402.254	-		-	527.195	-	ciri_circ_8149,find_circ_7312
circ_7316	chr9	122160323	122164051	+	exon	ENSMUSG00000038145		-	-	-		-	402.254	-		561.851	-	-	ciri_circ_8447,find_circ_7316
circ_7317	chr1	39983139	39990299	+	exon	ENSMUSG00000026074		-	-	-		-	1206.76	587.917		-	-	-	ciri_circ_6459,find_circ_7317
circ_7332	chr7	110124456	110142047	+	exon	ENSMUSG00000031016		-	-	-		-	402.254	-		-	527.195	-	ciri_circ_8354,find_circ_7332
circ_7334	chr2	49272041	49298729	+	exon	ENSMUSG00000036792		-	-	-		-	402.254	391.945		-	-	-	ciri_circ_4683,find_circ_7334
circ_7343	chr3	159901382	159934369	+	exon	ENSMUSG00000028173		-	-	-		-	402.254	391.945		-	-	-	ciri_circ_8177,find_circ_7343
circ_7345	chrX	163987098	163991469	-	exon	ENSMUSG00000031373		-	-	-		-	402.254	-		-	-	477.102	ciri_circ_8480,find_circ_7345
circ_7356	chr4	58486477	58504781	-	exon	ENSMUSG00000038668		-	-	-		-	603.381	391.945		-	-	-	ciri_circ_8197,find_circ_7356
circ_7363	chr10	83254783	83283869	-	exon	ENSMUSG00000034591		-	-	-		-	402.254	-		-	527.195	-	ciri_circ_7714,find_circ_7363
circ_7372	chr4	22385907	22403745	+	exon	ENSMUSG00000040410		-	-	-		-	603.381	-		561.851	-	-	ciri_circ_2505,find_circ_7372
circ_7373	chr4	137604523	137613861	+	exon	ENSMUSG00000043411		-	-	-		-	402.254	391.945		-	-	-	ciri_circ_8222,find_circ_7373
circ_7379	chr9	114914326	114920699	-	exon	ENSMUSG00000050627		-	-	-		-	603.381	391.945		-	-	-	ciri_circ_5336,find_circ_7379
circ_7383	chr14	20570248	20591613	-	exon	ENSMUSG00000034235		-	-	-		-	402.254	587.917		-	-	-	ciri_circ_7863,find_circ_7383
circ_7384	chr18	35587631	35588453	+	exon	ENSMUSG00000037236		-	-	-		-	603.381	-		-	790.793	-	ciri_circ_8012,find_circ_7384
circ_7394	chr13	98784776	98789873	-	exon	ENSMUSG00000041685		-	-	-		-	402.254	-		-	1054.39	-	ciri_circ_4256,find_circ_7394
circ_7407	chr18	13843782	13939141	-	exon	ENSMUSG00000024420		-	-	-		-	402.254	-		1404.63	-	-	ciri_circ_4540,find_circ_7407
circ_7411	chr11	88049977	88051332	+	exon	ENSMUSG00000018379		-	-	-		-	1005.64	391.945		-	-	-	ciri_circ_7769,find_circ_7411
circ_7427	chr13	112834859	112857026	+	exon	ENSMUSG00000021759		-	-	-		-	603.381	-		561.851	-	-	ciri_circ_7854,find_circ_7427
circ_7436	chr7	46890922	46907177	-	exon	ENSMUSG00000014402		-	-	-		-	402.254	-		842.777	-	-	ciri_circ_8338,find_circ_7436
circ_7444	chr5	72941292	72948726	+	exon	ENSMUSG00000036087		-	-	-		-	402.254	-		-	527.195	-	ciri_circ_8245,find_circ_7444
circ_7446	chr4	130668925	130718262	+	exon	ENSMUSG00000028580		-	-	-		-	402.254	587.917		-	-	-	ciri_circ_8217,find_circ_7446
circ_7451	chr6	52721298	52729468	+	exon	ENSMUSG00000004535		-	-	-		-	402.254	-		-	-	477.102	ciri_circ_8291,find_circ_7451
circ_7454	chr11	5329879	5338763	-	intron	ENSMUSG00000041961		-	-	-		-	402.254	391.945		-	-	-	ciri_circ_7733,find_circ_7454
circ_7456	chr18	7918582	7920131	+	intron	ENSMUSG00000024283		-	-	-		-	402.254	391.945		-	-	-	ciri_circ_8007,find_circ_7456
circ_7463	chr15	5322244	5333050	+	intergenic region	n/a		-	-	-		-	804.508	391.945		-	-	-	ciri_circ_4333,find_circ_7463
circ_7467	chrX	166428528	166435535	-	exon	ENSMUSG00000040586		-	-	-		-	402.254	-		842.777	-	-	ciri_circ_8482,find_circ_7467
circ_7468	chr15	25964224	25970224	+	exon	ENSMUSG00000022270		-	-	-		-	402.254	391.945		-	-	-	ciri_circ_7900,find_circ_7468
circ_7474	chr10	12640927	12654834	-	exon	ENSMUSG00000019820		-	-	-		-	402.254	-		-	527.195	-	ciri_circ_7683,find_circ_7474
circ_7477	chrX	51128921	51164664	-	exon	ENSMUSG00000036109		-	-	-		-	402.254	391.945		-	-	-	ciri_circ_9148,find_circ_7477
circ_7481	chr17	79333798	79335716	-	intergenic region	n/a		-	-	-		-	402.254	-		-	-	477.102	ciri_circ_6940,find_circ_7481
circ_7496	chr9	8643506	8680653	+	exon	ENSMUSG00000031997		-	-	-		-	402.254	-		-	1581.59	-	ciri_circ_11331,find_circ_7496
circ_7497	chr9	103046685	103050306	+	exon	ENSMUSG00000032548		-	-	-		-	402.254	-		-	790.793	-	ciri_circ_7577,find_circ_7497
circ_7501	chr18	38251086	38251400	+	exon	ENSMUSG00000024442		-	-	-		-	603.381	391.945		-	-	-	ciri_circ_8015,find_circ_7501
circ_7516	chr16	58424561	58445392	+	exon	ENSMUSG00000035107		-	-	-		-	402.254	391.945		-	-	-	ciri_circ_4416,find_circ_7516
circ_7521	chr14	61632437	61643455	-	exon	ENSMUSG00000097589		-	-	-		-	402.254	-		-	-	477.102	ciri_circ_1040,find_circ_7521
circ_7524	chr11	98753290	98764405	+	exon	ENSMUSG00000058756		-	-	-		-	402.254	391.945		-	-	-	ciri_circ_7776,find_circ_7524
circ_7526	chr4	117564627	117593162	+	exon	ENSMUSG00000033423		-	-	-		-	402.254	-		-	-	715.652	ciri_circ_6090,find_circ_7526
circ_7546	chr2	18109782	18126229	+	exon	ENSMUSG00000026743		-	-	-		-	402.254	-		-	-	477.102	ciri_circ_8060,find_circ_7546
circ_7557	chr11	59421525	59438513	-	exon	ENSMUSG00000009894		-	-	-		-	603.381	391.945		-	-	-	ciri_circ_7752,find_circ_7557
circ_7558	chr18	13526697	13546838	-	intergenic region	n/a		-	-	-		-	402.254	-		561.851	-	-	ciri_circ_8010,find_circ_7558
circ_7559	chr9	119284546	119294523	-	exon	ENSMUSG00000036737		-	-	-		-	402.254	391.945		-	-	-	ciri_circ_3787,find_circ_7559
circ_7564	chr2	73842360	73846375	-	exon	ENSMUSG00000027104		-	-	-		-	402.254	-		561.851	-	-	ciri_circ_2090,find_circ_7564
circ_7589	chr8	109802947	109819042	+	exon	ENSMUSG00000031731		-	-	-		-	603.381	587.917		-	-	-	ciri_circ_9101,find_circ_7589
circ_7598	chr6	112644588	112681676	-	exon	ENSMUSG00000030254		-	-	-		-	402.254	391.945		-	-	-	ciri_circ_8312,find_circ_7598
circ_7599	chr5	65450303	65468501	-	exon	ENSMUSG00000037822		-	-	-		-	402.254	-		-	527.195	-	ciri_circ_8244,find_circ_7599
circ_7602	chr7	126140565	126153279	-	exon	ENSMUSG00000000131		-	-	-		-	402.254	-		842.777	-	-	ciri_circ_8360,find_circ_7602
circ_7615	chr2	104727122	104730574	-	exon	ENSMUSG00000027173		-	-	-		-	804.508	-		-	-	715.652	ciri_circ_8097,find_circ_7615
circ_7623	chr3	144447270	144465285	-	exon	ENSMUSG00000040151		-	-	-		-	402.254	-		-	527.195	-	ciri_circ_8171,find_circ_7623
circ_7632	chr14	57694314	57703054	-	exon	ENSMUSG00000021959		-	-	-		-	603.381	-		-	790.793	-	ciri_circ_7871,find_circ_7632
circ_7639	chr2	50481465	50482682	+	intergenic region	n/a		-	-	-		-	402.254	391.945		-	-	-	ciri_circ_8073,find_circ_7639
circ_7670	chr6	37949222	37958694	+	exon	ENSMUSG00000029833		-	-	-		-	-	783.89		-	790.793	-	ciri_circ_9001,find_circ_7670
circ_7684	chr1	190808883	190844602	-	exon	ENSMUSG00000089872		-	-	-		-	-	587.917		-	527.195	-	ciri_circ_8523,find_circ_7684
circ_7685	chr4	133184969	133185752	+	exon	ENSMUSG00000028868		-	-	-		-	-	587.917		-	-	477.102	ciri_circ_8937,find_circ_7685
circ_7690	chr9	64160821	64161441	-	exon	ENSMUSG00000032400		-	-	-		-	-	391.945		842.777	-	-	ciri_circ_7553,find_circ_7690
circ_7694	chr15	93455451	93465245	+	exon	ENSMUSG00000036167		-	-	-		-	-	391.945		-	-	715.652	ciri_circ_6850,find_circ_7694
circ_7700	chr1	134422921	134424922	+	exon	ENSMUSG00000026457		-	-	-		-	-	391.945		-	-	954.203	ciri_circ_11375,find_circ_7700
circ_7704	chr3	55983750	56002941	-	exon	ENSMUSG00000027799		-	-	-		-	-	783.89		-	1317.99	-	ciri_circ_8141,find_circ_7704
circ_7715	chr14	7739459	7751583	-	intergenic region	n/a		-	-	-		-	-	391.945		561.851	-	-	ciri_circ_5665,find_circ_7715
circ_7725	chr14	32238531	32242346	+	exon	ENSMUSG00000021911		-	-	-		-	-	391.945		-	527.195	-	ciri_circ_10320,find_circ_7725
circ_7732	chr17	64675065	64679866	+	exon	ENSMUSG00000024085		-	-	-		-	-	391.945		-	527.195	-	ciri_circ_8751,find_circ_7732
circ_7735	chr5	90946790	90948945	+	exon	ENSMUSG00000029376		-	-	-		-	-	783.89		561.851	-	-	ciri_circ_8959,find_circ_7735
circ_7742	chr4	130668925	130669298	+	exon	ENSMUSG00000028580		-	-	-		-	-	1371.81		-	-	477.102	ciri_circ_8936,find_circ_7742
circ_7745	chr10	83254783	83256142	-	exon	ENSMUSG00000034591		-	-	-		-	-	391.945		-	-	477.102	ciri_circ_8541,find_circ_7745
circ_7756	chr6	143941351	143960920	-	exon	ENSMUSG00000041540		-	-	-		-	-	391.945		561.851	-	-	ciri_circ_7411,find_circ_7756
circ_7761	chr10	77354525	77359735	-	intron	ENSMUSG00000020262		-	-	-		-	-	391.945		-	-	477.102	ciri_circ_5482,find_circ_7761
circ_7770	chr17	13803939	13818278	+	exon	ENSMUSG00000068036		-	-	-		-	-	391.945		561.851	-	-	ciri_circ_8736,find_circ_7770
circ_7777	chr15	12889619	12890547	+	exon	ENSMUSG00000022191		-	-	-		-	-	391.945		561.851	-	-	ciri_circ_8686,find_circ_7777
circ_7788	chr4	84930941	84957179	+	intron	ENSMUSG00000038070		-	-	-		-	-	391.945		-	527.195	-	ciri_circ_11235,find_circ_7788
circ_7794	chr17	3145075	3164277	+	exon	ENSMUSG00000046201		-	-	-		-	-	587.917		-	-	477.102	ciri_circ_8735,find_circ_7794
circ_7799	chr13	9720773	9735775	-	exon	ENSMUSG00000021156		-	-	-		-	-	391.945		561.851	-	-	ciri_circ_8627,find_circ_7799
circ_7812	chr14	34676954	34695105	+	exon	ENSMUSG00000041408		-	-	-		-	-	391.945		561.851	-	-	ciri_circ_6761,find_circ_7812
circ_7822	chr2	118232904	118241735	-	exon	ENSMUSG00000027344		-	-	-		-	-	391.945		-	-	715.652	ciri_circ_2152,find_circ_7822
circ_7823	chr9	59884480	59889555	+	exon	ENSMUSG00000039585		-	-	-		-	-	391.945		-	-	715.652	ciri_circ_11743,find_circ_7823
circ_7830	chr5	143928099	143929350	+	exon	ENSMUSG00000079109		-	-	-		-	-	391.945		-	-	477.102	ciri_circ_8985,find_circ_7830
circ_7839	chr11	29470315	29477458	+	exon	ENSMUSG00000032740		-	-	-		-	-	391.945		-	-	477.102	ciri_circ_11395,find_circ_7839
circ_7842	chr17	78237742	78303108	+	exon	ENSMUSG00000024074		-	-	-		-	-	391.945		-	1054.39	-	ciri_circ_8764,find_circ_7842
circ_7843	chr17	24992270	25003405	-	exon	ENSMUSG00000038002		-	-	-		-	-	587.917		-	527.195	-	ciri_circ_1469,find_circ_7843
circ_7861	chr14	21318013	21318183	+	exon	ENSMUSG00000039197		-	-	-		-	-	783.89		561.851	-	-	ciri_circ_969,find_circ_7861
circ_7862	chr19	41238678	41256340	-	exon	ENSMUSG00000025016		-	-	-		-	-	783.89		-	527.195	-	ciri_circ_8808,find_circ_7862
circ_7873	chr8	77450693	77450923	-	exon	ENSMUSG00000037148		-	-	-		-	-	391.945		561.851	-	-	ciri_circ_5208,find_circ_7873
circ_7923	chr19	46512723	46513341	+	exon	ENSMUSG00000025034		-	-	-		-	-	391.945		-	527.195	-	ciri_circ_5893,find_circ_7923
circ_7927	chr6	136559764	136582466	+	exon	ENSMUSG00000030213		-	-	-		-	-	391.945		-	-	477.102	ciri_circ_7402,find_circ_7927
circ_7931	chr10	7701610	7703120	+	exon	ENSMUSG00000040021		-	-	-		-	-	391.945		561.851	-	-	ciri_circ_8524,find_circ_7931
circ_7935	chr1	153239255	153240495	-	exon	ENSMUSG00000026478		-	-	-		-	-	783.89		561.851	-	-	ciri_circ_8514,find_circ_7935
circ_7938	chr2	180672283	180673591	-	exon	ENSMUSG00000038914		-	-	-		-	-	391.945		-	-	1192.75	ciri_circ_4778,find_circ_7938
circ_7943	chrX	133681081	133681408	-	exon	ENSMUSG00000051323		-	-	-		-	-	391.945		-	527.195	-	ciri_circ_9155,find_circ_7943
circ_7958	chr2	59948087	59958492	-	exon	ENSMUSG00000026987		-	-	-		-	-	391.945		-	527.195	-	ciri_circ_7064,find_circ_7958
circ_7961	chr3	159907115	159923580	+	exon	ENSMUSG00000028173		-	-	-		-	-	587.917		-	527.195	-	ciri_circ_8914,find_circ_7961
circ_7968	chr4	34839332	34848032	-	intron	ENSMUSG00000039967		-	-	-		-	-	587.917		-	-	477.102	ciri_circ_2514,find_circ_7968
circ_7970	chr17	78237742	78281366	+	exon	ENSMUSG00000024074		-	-	-		-	-	783.89		-	-	1431.3	ciri_circ_8763,find_circ_7970
circ_7976	chr12	8698091	8706041	+	exon	ENSMUSG00000020594		-	-	-		-	-	391.945		-	-	477.102	ciri_circ_644,find_circ_7976
circ_7995	chr3	139015546	139021935	-	exon	ENSMUSG00000028149		-	-	-		-	-	391.945		-	-	477.102	ciri_circ_10468,find_circ_7995
circ_8020	chr5	114365646	114370228	-	exon	ENSMUSG00000001098		-	-	-		-	-	391.945		-	527.195	-	ciri_circ_4971,find_circ_8020
circ_8026	chr9	8634047	8680582	+	exon	ENSMUSG00000031997		-	-	-		-	-	391.945		-	527.195	-	ciri_circ_11330,find_circ_8026
circ_8029	chr12	9038082	9038434	+	intron	ENSMUSG00000066637		-	-	-		-	-	587.917		561.851	-	-	ciri_circ_8605,find_circ_8029
circ_8035	chr19	47239802	47240671	+	exon	ENSMUSG00000006435		-	-	-		-	-	587.917		842.777	-	-	ciri_circ_8815,find_circ_8035
circ_8039	chr2	179923979	179926330	-	exon	ENSMUSG00000039117		-	-	-		-	-	587.917		-	-	715.652	ciri_circ_8876,find_circ_8039
circ_8052	chr1	106000931	106016093	+	exon	ENSMUSG00000038866		-	-	-		-	-	391.945		-	790.793	-	ciri_circ_3938,find_circ_8052
circ_8057	chr4	139238909	139262097	+	exon	ENSMUSG00000028745		-	-	-		-	-	587.917		-	-	477.102	ciri_circ_2637,find_circ_8057
circ_8059	chr11	60706193	60706573	+	exon	ENSMUSG00000020536		-	-	-		-	-	587.917		-	527.195	-	ciri_circ_8572,find_circ_8059
circ_8074	chr1	5093363	5133262	+	exon	ENSMUSG00000033793		-	-	-		-	-	391.945		-	527.195	-	ciri_circ_6449,find_circ_8074
circ_8079	chr15	100328218	100335427	+	intergenic region	n/a		-	-	-		-	-	587.917		1123.7	-	-	ciri_circ_4379,find_circ_8079
circ_8095	chr17	63921613	63934412	+	exon	ENSMUSG00000000127		-	-	-		-	-	783.89		-	790.793	-	ciri_circ_8750,find_circ_8095
circ_8103	chr18	68005685	68064686	+	intron	ENSMUSG00000024544		-	-	-		-	-	391.945		561.851	-	-	ciri_circ_5863,find_circ_8103
circ_8113	chr6	148796641	148801989	-	exon	ENSMUSG00000040029		-	-	-		-	-	587.917		-	790.793	-	ciri_circ_3186,find_circ_8113
circ_8119	chr4	68904737	68905004	-	exon	ENSMUSG00000028351		-	-	-		-	-	391.945		-	-	477.102	ciri_circ_10029,find_circ_8119
circ_8123	chr9	110567708	110569811	+	exon	ENSMUSG00000044791		-	-	-		-	-	391.945		-	-	477.102	ciri_circ_10191,find_circ_8123
circ_8124	chr16	17015898	17018503	+	intron	ENSMUSG00000063358		-	-	-		-	-	587.917		561.851	-	-	ciri_circ_4395,find_circ_8124
circ_8143	chr19	26619684	26654511	+	exon	ENSMUSG00000024921		-	-	-		-	-	783.89		561.851	-	-	ciri_circ_8800,find_circ_8143
circ_8148	chr11	107099566	107111635	-	exon	ENSMUSG00000040481		-	-	-		-	-	391.945		-	527.195	-	ciri_circ_8592,find_circ_8148
circ_8158	chr2	73845439	73846375	-	exon	ENSMUSG00000027104		-	-	-		-	-	783.89		-	527.195	-	ciri_circ_8846,find_circ_8158
circ_8162	chr15	44388469	44420873	-	exon	ENSMUSG00000038736		-	-	-		-	-	587.917		-	790.793	-	ciri_circ_4350,find_circ_8162
circ_8179	chr5	29346767	29365206	-	exon	ENSMUSG00000010721		-	-	-		-	-	391.945		842.777	-	-	ciri_circ_8949,find_circ_8179
circ_8184	chr14	56758630	56772006	-	exon	ENSMUSG00000021938		-	-	-		-	-	391.945		-	-	477.102	ciri_circ_8664,find_circ_8184
circ_8194	chr2	145512754	145518947	+	exon	ENSMUSG00000063873		-	-	-		-	-	391.945		-	-	477.102	ciri_circ_8865,find_circ_8194
circ_8219	chr19	34586270	34607998	+	intergenic region	n/a		-	-	-		-	-	391.945		561.851	-	-	ciri_circ_10813,find_circ_8219
circ_8223	chr11	113559511	113591932	-	exon	ENSMUSG00000041654		-	-	-		-	-	391.945		-	527.195	-	ciri_circ_4118,find_circ_8223
circ_8237	chr16	32950292	32955405	+	exon	ENSMUSG00000022801		-	-	-		-	-	587.917		-	527.195	-	ciri_circ_8723,find_circ_8237
circ_8244	chr2	142846929	142857427	-	exon	ENSMUSG00000038844		-	-	-		-	-	783.89		-	790.793	-	ciri_circ_4750,find_circ_8244
circ_8269	chr2	37469377	37509078	+	exon	ENSMUSG00000035437		-	-	-		-	-	587.917		-	-	477.102	ciri_circ_8833,find_circ_8269
circ_8280	chr5	130229449	130232040	+	exon	ENSMUSG00000053094		-	-	-		-	-	391.945		-	-	477.102	ciri_circ_9548,find_circ_8280
circ_8285	chr12	86057794	86069910	-	exon	ENSMUSG00000021253		-	-	-		-	-	587.917		-	-	715.652	ciri_circ_8621,find_circ_8285
circ_8290	chr9	100834418	100866214	+	exon	ENSMUSG00000037286		-	-	-		-	-	391.945		-	-	715.652	ciri_circ_3758,find_circ_8290
circ_8292	chr13	28668370	28668704	-	exon	ENSMUSG00000085936		-	-	-		-	-	391.945		561.851	-	-	ciri_circ_8628,find_circ_8292
circ_8296	chr19	37044522	37068291	-	exon	ENSMUSG00000039652		-	-	-		-	-	587.917		-	-	477.102	ciri_circ_8805,find_circ_8296
circ_8331	chr6	147055852	147061492	+	exon	ENSMUSG00000040112		-	-	-		-	-	391.945		-	-	477.102	ciri_circ_9029,find_circ_8331
circ_8333	chr10	62780441	62791042	-	exon	ENSMUSG00000020074		-	-	-		-	-	587.917		-	527.195	-	ciri_circ_8535,find_circ_8333
circ_8340	chr3	103344294	103344643	+	exon	ENSMUSG00000033014		-	-	-		-	-	391.945		-	-	477.102	ciri_circ_8902,find_circ_8340
circ_8347	chr2	104770043	104780260	-	exon	ENSMUSG00000074994		-	-	-		-	-	587.917		-	-	715.652	ciri_circ_8852,find_circ_8347
circ_8348	chr9	116105034	116110303	-	exon	ENSMUSG00000032440		-	-	-		-	-	587.917		-	527.195	-	ciri_circ_9138,find_circ_8348
circ_8362	chr11	46112757	46118491	+	exon	ENSMUSG00000011256		-	-	-		-	-	391.945		561.851	-	-	ciri_circ_8562,find_circ_8362
circ_8364	chr7	112331896	112346908	+	exon	ENSMUSG00000038244		-	-	-		-	-	391.945		561.851	-	-	ciri_circ_9059,find_circ_8364
circ_8367	chr17	71436706	71441114	-	exon	ENSMUSG00000024054		-	-	-		-	-	391.945		-	527.195	-	ciri_circ_8755,find_circ_8367
circ_8379	chrX	143715136	143744001	+	exon	ENSMUSG00000031284		-	-	-		-	-	391.945		-	-	477.102	ciri_circ_9158,find_circ_8379
circ_8381	chr3	122504927	122513003	+	exon	ENSMUSG00000028121		-	-	-		-	-	391.945		-	527.195	-	ciri_circ_8909,find_circ_8381
circ_8388	chr8	26088060	26095830	-	exon	ENSMUSG00000037234		-	-	-		-	-	391.945		561.851	-	-	ciri_circ_10945,find_circ_8388
circ_8396	chr6	37903533	37915297	+	exon	ENSMUSG00000029833		-	-	-		-	-	391.945		561.851	-	-	ciri_circ_8999,find_circ_8396
circ_8398	chr1	181109160	181123984	-	exon	ENSMUSG00000026516		-	-	-		-	-	391.945		-	527.195	-	ciri_circ_193,find_circ_8398
circ_8400	chr13	55233895	55238862	+	exon	ENSMUSG00000021488		-	-	-		-	-	391.945		-	527.195	-	ciri_circ_8633,find_circ_8400
circ_8414	chr11	23401453	23405953	+	exon	ENSMUSG00000056342		-	-	-		-	-	587.917		-	527.195	-	ciri_circ_7737,find_circ_8414
circ_8439	chr11	108434126	108440596	+	exon	ENSMUSG00000020728		-	-	-		-	-	391.945		-	-	477.102	ciri_circ_7779,find_circ_8439
circ_8450	chr15	31502720	31509822	-	exon	ENSMUSG00000039100		-	-	-		-	-	391.945		-	-	477.102	ciri_circ_1130,find_circ_8450
circ_8496	chr15	55577448	55588763	+	exon	ENSMUSG00000022369		-	-	-		-	-	-		-	790.793	477.102	ciri_circ_9334,find_circ_8496
circ_8579	chr8	69619314	69708465	-	intergenic region	n/a		-	-	-		-	-	-		4775.74	-	3339.71	ciri_circ_3466,find_circ_8579
circ_8647	chr3	103028789	103029212	+	exon	ENSMUSG00000068823		-	-	-		-	-	-		-	790.793	715.652	ciri_circ_11215,find_circ_8647
circ_8662	chr1	160682041	160702460	-	exon	ENSMUSG00000026721		-	-	-		-	-	-		561.851	-	477.102	ciri_circ_10650,find_circ_8662
circ_8700	chr17	27985066	27988916	+	exon	ENSMUSG00000024219		-	-	-		-	-	-		561.851	-	477.102	ciri_circ_11532,find_circ_8700
circ_8752	chr15	85386991	85393506	+	exon	ENSMUSG00000016541		-	-	-		-	-	-		842.777	1054.39	-	ciri_circ_6844,find_circ_8752
circ_8773	chr15	73257034	73268893	-	exon	ENSMUSG00000022607		-	-	-		-	-	-		-	527.195	715.652	ciri_circ_8707,find_circ_8773
circ_8816	chr8	106981126	106981339	+	exon	ENSMUSG00000041308		-	-	-		-	-	-		-	1054.39	715.652	ciri_circ_10588,find_circ_8816
circ_8861	chr8	4327757	4336526	+	intron	ENSMUSG00000023235		-	-	-		-	-	-		561.851	-	477.102	ciri_circ_7467,find_circ_8861
circ_8976	chr15	25800041	25801280	+	exon	ENSMUSG00000022272		-	-	-		-	-	-		-	790.793	477.102	ciri_circ_6819,find_circ_8976
circ_8985	chr15	79377047	79378713	-	exon	ENSMUSG00000009035		-	-	-		-	-	-		561.851	-	477.102	ciri_circ_9339,find_circ_8985
circ_9109	chr2	32200826	32204324	+	exon	ENSMUSG00000039262		-	-	-		-	-	-		-	527.195	477.102	ciri_circ_7043,find_circ_9109
circ_9253	chr19	45757905	45768007	-	exon	ENSMUSG00000025220		-	-	-		-	-	-		561.851	527.195	-	ciri_circ_9418,find_circ_9253
circ_9446	chr11	72728761	72732413	+	exon	ENSMUSG00000020790		-	-	-		-	-	-		1123.7	527.195	-	ciri_circ_9741,find_circ_9446
circ_9702	chr1	169974806	169974957	-	exon	ENSMUSG00000026674		-	-	-		-	-	-		561.851	790.793	-	ciri_circ_7673,find_circ_9702
circ_9727	chr9	96557400	96568487	-	exon	ENSMUSG00000032413		-	-	-		-	-	-		-	1317.99	715.652	ciri_circ_3744,find_circ_9727
circ_9792	chr1	30829843	30863255	-	exon	ENSMUSG00000048874		-	-	-		-	-	-		-	790.793	477.102	ciri_circ_10988,find_circ_9792
circ_9942	chr10	50748806	50754122	+	exon	ENSMUSG00000038774		-	-	-		-	-	-		-	790.793	477.102	ciri_circ_9717,find_circ_9942
circ_9946	chr9	72591751	72593360	+	exon	ENSMUSG00000037674		-	-	-		-	-	-		-	527.195	954.203	ciri_circ_7564,find_circ_9946
circ_10357	chr1	149879990	149902442	-	exon	ENSMUSG00000056220		-	-	-		-	-	-		-	527.195	715.652	ciri_circ_10218,find_circ_10357
circ_10424	chr6	67063395	67074026	+	exon	ENSMUSG00000087231		-	-	-		-	-	-		-	527.195	954.203	ciri_circ_10533,find_circ_10424
circ_10463	chr19	3604002	3605494	-	exon	ENSMUSG00000024913		-	-	-		-	-	-		561.851	-	477.102	ciri_circ_10396,find_circ_10463
circ_10476	chr2	131511984	131525073	+	exon	ENSMUSG00000027333		-	-	-		-	-	-		561.851	527.195	-	ciri_circ_11197,find_circ_10476
circ_10487	chr1	43153076	43153254	-	exon	ENSMUSG00000008136		-	-	-		-	-	-		561.851	-	477.102	ciri_circ_10637,find_circ_10487
circ_10492	chr15	103205492	103213254	-	exon	ENSMUSG00000009575		-	-	-		-	-	-		561.851	-	715.652	ciri_circ_6855,find_circ_10492
circ_10518	chr3	95470177	95476182	+	exon	ENSMUSG00000015522		-	-	-		-	-	-		561.851	-	477.102	ciri_circ_8155,find_circ_10518
circ_10547	chr8	61684735	61687449	-	exon	ENSMUSG00000058056		-	-	-		-	-	-		842.777	-	477.102	ciri_circ_10947,find_circ_10547
circ_10549	chr17	74351953	74359349	+	exon	ENSMUSG00000024068		-	-	-		-	-	-		561.851	-	477.102	ciri_circ_9379,find_circ_10549
circ_10560	chr6	39170769	39173438	-	exon	ENSMUSG00000042599		-	-	-		-	-	-		561.851	-	477.102	ciri_circ_11677,find_circ_10560
circ_10567	chr8	91441663	91474452	+	exon	ENSMUSG00000055932		-	-	-		-	-	-		561.851	-	477.102	ciri_circ_10953,find_circ_10567
circ_10570	chr3	57769040	57796285	+	exon	ENSMUSG00000036503		-	-	-		-	-	-		842.777	-	477.102	ciri_circ_2310,find_circ_10570
circ_10574	chr1	173868200	173905631	-	intron	ENSMUSG00000090272		-	-	-		-	-	-		842.777	-	477.102	ciri_circ_3963,find_circ_10574
circ_10681	chr9	110034373	110035506	+	exon	ENSMUSG00000032479		-	-	-		-	-	-		1123.7	-	477.102	ciri_circ_10972,find_circ_10681
circ_10721	chr5	13399876	13473518	+	exon	ENSMUSG00000028883		-	-	-		-	-	-		561.851	-	477.102	ciri_circ_2684,find_circ_10721
circ_10749	chr6	92410757	92425693	-	exon	ENSMUSG00000030020		-	-	-		-	-	-		561.851	-	477.102	ciri_circ_11686,find_circ_10749
circ_10765	chr2	90859476	90861449	+	exon	ENSMUSG00000027282		-	-	-		-	-	-		561.851	-	477.102	ciri_circ_2104,find_circ_10765
circ_10769	chr12	8268364	8275890	+	exon	ENSMUSG00000037669		-	-	-		-	-	-		842.777	527.195	-	ciri_circ_5580,find_circ_10769
circ_10778	chr14	64887575	64897126	-	exon	ENSMUSG00000021972		-	-	-		-	-	-		561.851	-	477.102	ciri_circ_4303,find_circ_10778
circ_10780	chr6	137588993	137591492	-	exon	ENSMUSG00000015766		-	-	-		-	-	-		561.851	527.195	-	ciri_circ_6241,find_circ_10780
circ_10795	chr3	121235043	121235764	-	exon	ENSMUSG00000028132		-	-	-		-	-	-		842.777	1317.99	-	ciri_circ_10860,find_circ_10795
circ_10811	chr3	142629969	142660211	+	intergenic region	n/a		-	-	-		-	-	-		1123.7	1317.99	-	ciri_circ_2461,find_circ_10811
circ_10834	chr1	44766014	44781106	+	exon	ENSMUSG00000056870		-	-	-		-	-	-		561.851	527.195	-	ciri_circ_10639,find_circ_10834
circ_10840	chr16	91664198	91664822	+	exon	ENSMUSG00000022961		-	-	-		-	-	-		561.851	-	477.102	ciri_circ_11522,find_circ_10840
circ_10843	chr9	78457210	78458047	+	exon	ENSMUSG00000032342		-	-	-		-	-	-		561.851	527.195	-	ciri_circ_5309,find_circ_10843
circ_10847	chr12	73932274	73936296	+	exon	ENSMUSG00000021109		-	-	-		-	-	-		842.777	-	477.102	ciri_circ_9776,find_circ_10847
circ_10861	chr5	24126822	24128104	+	exon	ENSMUSG00000028986		-	-	-		-	-	-		561.851	-	477.102	ciri_circ_10891,find_circ_10861
circ_10880	chr2	166826927	166836457	+	exon	ENSMUSG00000074582		-	-	-		-	-	-		561.851	-	477.102	ciri_circ_2258,find_circ_10880
circ_10890	chr15	32548715	32550462	+	exon	ENSMUSG00000022231		-	-	-		-	-	-		842.777	527.195	-	ciri_circ_10741,find_circ_10890
circ_10906	chr9	9046505	9075010	-	exon	ENSMUSG00000050730		-	-	-		-	-	-		842.777	-	715.652	ciri_circ_11735,find_circ_10906
circ_10911	chr11	79546971	79551134	+	exon	ENSMUSG00000020716		-	-	-		-	-	-		842.777	527.195	-	ciri_circ_6623,find_circ_10911
circ_10920	chr12	111592577	111633834	+	exon	ENSMUSG00000007411		-	-	-		-	-	-		1123.7	-	477.102	ciri_circ_10702,find_circ_10920
circ_10924	chr7	82671605	82698017	+	exon	ENSMUSG00000038563		-	-	-		-	-	-		842.777	527.195	-	ciri_circ_10934,find_circ_10924
circ_10935	chr15	58968839	58972560	-	exon	ENSMUSG00000022353		-	-	-		-	-	-		842.777	-	477.102	ciri_circ_1167,find_circ_10935
circ_10938	chr2	28847512	28848285	+	intron	ENSMUSG00000026806		-	-	-		-	-	-		561.851	527.195	-	ciri_circ_10824,find_circ_10938
circ_10948	chr15	3426555	3458008	-	intron	ENSMUSG00000055737		-	-	-		-	-	-		561.851	527.195	-	ciri_circ_10738,find_circ_10948
circ_10967	chr7	28825874	28826273	+	exon	ENSMUSG00000053898		-	-	-		-	-	-		561.851	790.793	-	ciri_circ_10927,find_circ_10967
circ_10978	chr2	32794588	32796170	-	exon	ENSMUSG00000026797		-	-	-		-	-	-		-	527.195	954.203	ciri_circ_11185,find_circ_10978
circ_11040	chr11	87159821	87167516	+	exon	ENSMUSG00000018548		-	-	-		-	-	-		-	790.793	477.102	ciri_circ_10271,find_circ_11040
circ_11043	chr9	8626593	8680653	+	exon	ENSMUSG00000031997		-	-	-		-	-	-		-	790.793	715.652	ciri_circ_11329,find_circ_11043
circ_11045	chr1	136292880	136304456	-	exon	ENSMUSG00000041570		-	-	-		-	-	-		-	1317.99	477.102	ciri_circ_3949,find_circ_11045
circ_11138	chr7	141231227	141232541	+	exon	ENSMUSG00000038611		-	-	-		-	-	-		-	527.195	477.102	ciri_circ_10134,find_circ_11138
circ_11157	chr2	167510876	167511326	+	exon	ENSMUSG00000006418		-	-	-		-	-	-		-	527.195	715.652	ciri_circ_11204,find_circ_11157
circ_11168	chrX	103595931	103605619	-	exon	ENSMUSG00000086370		-	-	-		-	-	-		-	527.195	477.102	ciri_circ_11356,find_circ_11168
circ_11199	chr17	12713961	12716047	-	exon	ENSMUSG00000023830		-	-	-		-	-	-		-	790.793	477.102	ciri_circ_11133,find_circ_11199
circ_11214	chr9	78449419	78449835	+	exon	ENSMUSG00000032342		-	-	-		-	-	-		-	527.195	477.102	ciri_circ_11343,find_circ_11214
circ_11290	chr11	85036480	85042680	-	exon	ENSMUSG00000000804		-	-	-		-	-	-		-	527.195	477.102	ciri_circ_11050,find_circ_11290
circ_11306	chr11	62151870	62161910	+	exon	ENSMUSG00000042331		-	-	-		-	-	-		-	790.793	477.102	ciri_circ_5533,find_circ_11306
circ_11326	chr7	83947148	83951618	-	exon	ENSMUSG00000052353		-	-	-		-	-	-		-	2372.38	1192.75	ciri_circ_11303,find_circ_11326
circ_11349	chr12	70078112	70102854	-	exon	ENSMUSG00000021068		-	-	-		-	-	-		-	790.793	477.102	ciri_circ_11065,find_circ_11349
circ_11357	chr18	12871078	12898301	-	exon	ENSMUSG00000044252		-	-	-		-	-	-		-	527.195	477.102	ciri_circ_11164,find_circ_11357
circ_11371	chr9	80087430	80092412	+	exon	ENSMUSG00000034252		-	-	-		-	-	-		-	790.793	477.102	ciri_circ_3723,find_circ_11371
circ_11461	chr9	73749482	73758677	-	exon	ENSMUSG00000062151		-	-	-		-	-	-		-	790.793	477.102	ciri_circ_5308,find_circ_11461
circ_11489	chr11	108570288	108606395	+	exon	ENSMUSG00000020728		-	-	-		-	-	-		-	527.195	477.102	ciri_circ_11418,find_circ_11489
circ_11491	chr9	65730976	65795495	-	exon	ENSMUSG00000040524		-	-	-		-	-	-		-	527.195	954.203	ciri_circ_5296,find_circ_11491
circ_11500	chr5	31647721	31673445	-	exon	ENSMUSG00000029136		-	-	-		-	-	-		-	1581.59	1192.75	ciri_circ_11249,find_circ_11500
circ_11507	chr3	5329435	5329666	+	exon	ENSMUSG00000025255		-	-	-		-	-	-		-	790.793	477.102	ciri_circ_11205,find_circ_11507
circ_1	chr4	129317648	129322869	-	exon	ENSMUSG00000057236		644.427	-	-		925.936	-	587.917		-	-	-	ciri_circ_2623,find_circ_1
circ_2	chr17	28507236	28507469	-	exon	ENSMUSG00000024222		429.618	-	-		-	402.254	587.917		-	-	-	ciri_circ_1491,find_circ_2
circ_5	chr15	34945006	34959076	-	exon	ENSMUSG00000022329		429.618	-	-		370.374	402.254	-		-	-	-	ciri_circ_1138,find_circ_5
circ_20	chr3	144737863	144802182	-	intergenic region	n/a		2362.9	-	-		3333.37	4625.92	-		-	-	-	ciri_circ_2463,find_circ_20
circ_27	chr7	80396929	80398928	-	exon	ENSMUSG00000030530		644.427	428.923	-		370.374	-	-		-	-	-	ciri_circ_3264,find_circ_27
circ_38	chr18	13843782	13847134	-	exon	ENSMUSG00000024420		429.618	643.385	-		-	402.254	-		-	-	-	ciri_circ_1712,find_circ_38
circ_46	chr2	18906229	18911528	-	intron	ENSMUSG00000026737		1288.85	-	-		370.374	1005.64	-		-	-	-	ciri_circ_1992,find_circ_46
circ_54	chr11	50307470	50310867	-	exon	ENSMUSG00000020368		644.427	-	454.199		370.374	-	-		-	-	-	ciri_circ_469,find_circ_54
circ_61	chr10	127308258	127308679	-	exon	ENSMUSG00000040354		644.427	-	-		-	402.254	-		-	527.195	-	ciri_circ_386,find_circ_61
circ_79	chr3	148846849	148865709	-	exon	ENSMUSG00000028184		429.618	-	-		370.374	-	391.945		-	-	-	ciri_circ_7192,find_circ_79
circ_86	chr9	55807013	55859918	-	exon	ENSMUSG00000034007		429.618	-	-		-	402.254	-		-	-	715.652	ciri_circ_6372,find_circ_86
circ_98	chr13	112851403	112859701	+	exon	ENSMUSG00000021759		429.618	428.923	-		-	-	391.945		-	-	-	ciri_circ_945,find_circ_98
circ_124	chr2	91594683	91596555	+	exon	ENSMUSG00000040549		429.618	428.923	-		555.562	-	-		-	-	-	ciri_circ_4713,find_circ_124
circ_130	chr9	86422841	86452010	-	exon	ENSMUSG00000032415		644.427	-	681.298		-	-	-		561.851	-	-	ciri_circ_3735,find_circ_130
circ_140	chr17	26742042	26743131	+	exon	ENSMUSG00000048249		644.427	428.923	-		-	-	-		1123.7	-	-	ciri_circ_1477,find_circ_140
circ_150	chr19	46512723	46514737	+	exon	ENSMUSG00000025034		429.618	-	-		-	402.254	-		-	-	715.652	ciri_circ_1926,find_circ_150
circ_151	chr8	77601415	77606417	-	exon	ENSMUSG00000031617		429.618	428.923	-		-	402.254	-		-	-	-	ciri_circ_5210,find_circ_151
circ_152	chr10	49101128	49113620	-	exon	ENSMUSG00000056073		429.618	-	454.199		-	-	391.945		-	-	-	ciri_circ_5466,find_circ_152
circ_162	chr19	45770051	45777017	-	exon	ENSMUSG00000025220		429.618	-	-		370.374	402.254	-		-	-	-	ciri_circ_11178,find_circ_162
circ_173	chr8	56564558	56569410	+	exon	ENSMUSG00000038206		859.236	-	454.199		555.562	-	-		-	-	-	ciri_circ_3453,find_circ_173
circ_206	chr5	43750862	43773659	-	exon	ENSMUSG00000039753		644.427	-	-		555.562	603.381	-		-	-	-	ciri_circ_2735,find_circ_206
circ_213	chr6	149166806	149185124	-	exon	ENSMUSG00000068250		429.618	-	-		-	603.381	-		561.851	-	-	ciri_circ_3190,find_circ_213
circ_214	chr2	118121117	118122680	+	exon	ENSMUSG00000040152		429.618	-	-		370.374	-	-		561.851	-	-	ciri_circ_7098,find_circ_214
circ_229	chr8	46103515	46116398	-	exon	ENSMUSG00000038291		429.618	-	-		370.374	-	587.917		-	-	-	ciri_circ_3446,find_circ_229
circ_231	chr10	98968694	98969124	+	exon	ENSMUSG00000019943		429.618	857.846	-		-	603.381	-		-	-	-	ciri_circ_354,find_circ_231
circ_236	chr10	8245903	8330223	-	exon	ENSMUSG00000047712		429.618	-	-		-	1005.64	783.89		-	-	-	ciri_circ_215,find_circ_236
circ_241	chr1	160682041	160740931	-	exon	ENSMUSG00000026721		644.427	-	-		555.562	-	-		-	790.793	-	ciri_circ_141,find_circ_241
circ_243	chr13	98775821	98789873	-	exon	ENSMUSG00000041685		644.427	-	-		-	402.254	-		-	-	715.652	ciri_circ_926,find_circ_243
circ_248	chr15	82373111	82390522	-	intergenic region	n/a		859.236	643.385	-		-	-	391.945		-	-	-	ciri_circ_1222,find_circ_248
circ_288	chr17	28400960	28441053	-	exon	ENSMUSG00000024222		644.427	-	-		555.562	402.254	-		-	-	-	ciri_circ_1483,find_circ_288
circ_307	chr1	33721608	33725019	+	exon	ENSMUSG00000004768		429.618	428.923	-		-	-	-		842.777	-	-	ciri_circ_27,find_circ_307
circ_331	chr1	60525592	60533406	-	exon	ENSMUSG00000026014		859.236	-	454.199		-	-	-		-	-	954.203	ciri_circ_50,find_circ_331
circ_353	chr10	94748941	94750659	+	exon	ENSMUSG00000020024		429.618	-	-		-	-	391.945		-	527.195	-	ciri_circ_352,find_circ_353
circ_378	chr3	94502170	94562000	-	exon	ENSMUSG00000028136		429.618	-	-		-	603.381	-		-	527.195	-	ciri_circ_2385,find_circ_378
circ_385	chr8	46793493	46837838	+	exon	ENSMUSG00000031627		859.236	-	-		925.936	-	587.917		-	-	-	ciri_circ_3449,find_circ_385
circ_390	chr19	7373657	7374850	-	exon	ENSMUSG00000024970		1074.04	-	-		555.562	-	-		-	1317.99	-	ciri_circ_1828,find_circ_390
circ_393	chr4	13859811	13866032	+	exon	ENSMUSG00000006586		429.618	-	-		-	402.254	-		-	-	477.102	ciri_circ_2497,find_circ_393
circ_436	chr6	34356256	34384407	+	intergenic region	n/a		2362.9	-	-		2592.62	2413.53	-		-	-	-	ciri_circ_2969,find_circ_436
circ_463	chr2	102057907	102070058	-	exon	ENSMUSG00000048058		429.618	428.923	-		-	-	1175.83		-	-	-	ciri_circ_2118,find_circ_463
circ_471	chr5	123563426	123565075	-	exon	ENSMUSG00000029434		859.236	-	-		370.374	-	-		-	790.793	-	ciri_circ_2855,find_circ_471
circ_490	chr6	28520145	28531499	+	exon	ENSMUSG00000001424		644.427	-	454.199		-	-	-		561.851	-	-	ciri_circ_2936,find_circ_490
circ_499	chr7	132827703	132837207	-	exon	ENSMUSG00000030960		429.618	1072.31	-		-	402.254	-		-	-	-	ciri_circ_3380,find_circ_499
circ_529	chr11	23320661	23333859	+	exon	ENSMUSG00000056342		644.427	-	-		555.562	-	391.945		-	-	-	ciri_circ_431,find_circ_529
circ_539	chr11	29533226	29545101	+	exon	ENSMUSG00000020459		644.427	-	-		-	-	-		1123.7	790.793	-	ciri_circ_441,find_circ_539
circ_541	chr6	94513805	94535768	+	exon	ENSMUSG00000045100		429.618	-	454.199		-	-	-		-	527.195	-	ciri_circ_3080,find_circ_541
circ_573	chr11	65719484	65756371	-	exon	ENSMUSG00000033352		644.427	-	454.199		-	-	391.945		-	-	-	ciri_circ_503,find_circ_573
circ_598	chr17	3412632	3415185	+	exon	ENSMUSG00000023800		644.427	-	-		555.562	-	-		-	527.195	-	ciri_circ_1346,find_circ_598
circ_606	chr5	28331111	28342514	+	exon	ENSMUSG00000048271		429.618	-	454.199		-	402.254	-		-	-	-	ciri_circ_2700,find_circ_606
circ_609	chr17	17529701	17579372	-	exon	ENSMUSG00000023845		429.618	-	454.199		-	603.381	-		-	-	-	ciri_circ_1444,find_circ_609
circ_630	chr12	4630637	4633562	+	exon	ENSMUSG00000020640		429.618	-	454.199		-	-	-		-	527.195	-	ciri_circ_641,find_circ_630
circ_641	chr15	36181696	36233343	+	exon	ENSMUSG00000037617		644.427	-	-		370.374	-	391.945		-	-	-	ciri_circ_1146,find_circ_641
circ_657	chr19	60987702	60988920	+	intron	ENSMUSG00000003228		429.618	-	454.199		-	-	391.945		-	-	-	ciri_circ_5899,find_circ_657
circ_661	chr11	110313329	110314665	-	exon	ENSMUSG00000018800		429.618	-	-		370.374	804.508	-		-	-	-	ciri_circ_6643,find_circ_661
circ_670	chr5	120878321	120897206	-	intergenic region	n/a		859.236	-	-		-	-	-		-	1054.39	477.102	ciri_circ_2833,find_circ_670
circ_683	chr2	164424575	164424865	+	exon	ENSMUSG00000017009		1074.04	-	681.298		555.562	-	-		-	-	-	ciri_circ_2256,find_circ_683
circ_696	chr7	51887912	51943791	+	exon	ENSMUSG00000030498		429.618	-	-		-	-	587.917		-	527.195	-	ciri_circ_3236,find_circ_696
circ_711	chr6	99435216	99439456	-	intron	ENSMUSG00000030067;ENSMUSG00000030068		429.618	428.923	454.199		-	-	-		-	-	-	ciri_circ_6228,find_circ_711
circ_717	chr17	45677926	45679714	-	exon	ENSMUSG00000036026		429.618	-	454.199		-	402.254	-		-	-	-	ciri_circ_1582,find_circ_717
circ_741	chr15	95948272	95949956	+	exon	ENSMUSG00000064210		429.618	-	-		-	-	-		561.851	-	477.102	ciri_circ_1240,find_circ_741
circ_742	chr18	46433132	46434366	-	intergenic region	n/a		429.618	-	-		370.374	-	783.89		-	-	-	ciri_circ_6967,find_circ_742
circ_747	chr9	86422841	86435353	-	exon	ENSMUSG00000032415		429.618	428.923	-		-	-	391.945		-	-	-	ciri_circ_3732,find_circ_747
circ_754	chr8	105663754	105666792	+	exon	ENSMUSG00000005698		429.618	-	-		555.562	-	-		-	-	477.102	ciri_circ_7498,find_circ_754
circ_758	chr3	117782154	117800993	-	exon	ENSMUSG00000028007		859.236	428.923	-		-	402.254	-		-	-	-	ciri_circ_2424,find_circ_758
circ_813	chr5	34419998	34440590	+	exon	ENSMUSG00000037210		429.618	-	-		370.374	-	-		561.851	-	-	ciri_circ_2728,find_circ_813
circ_840	chr19	28530479	28540408	-	intron	ENSMUSG00000052942		429.618	428.923	-		-	804.508	-		-	-	-	ciri_circ_1861,find_circ_840
circ_841	chr10	75717438	75721539	-	exon	ENSMUSG00000020196		429.618	-	-		370.374	603.381	-		-	-	-	ciri_circ_311,find_circ_841
circ_861	chr7	83673034	83682949	-	exon	ENSMUSG00000001741		429.618	428.923	-		-	-	-		-	-	477.102	ciri_circ_5135,find_circ_861
circ_867	chr6	29863143	29871286	+	exon	ENSMUSG00000029772		429.618	-	681.298		-	-	-		842.777	-	-	ciri_circ_2943,find_circ_867
circ_871	chr3	69019175	69025985	+	exon	ENSMUSG00000034349		429.618	-	-		1111.12	804.508	-		-	-	-	ciri_circ_2320,find_circ_871
circ_884	chr11	3164557	3170704	-	exon	ENSMUSG00000023764		859.236	-	454.199		555.562	-	-		-	-	-	ciri_circ_397,find_circ_884
circ_926	chr9	66453337	66458425	+	exon	ENSMUSG00000038664		429.618	428.923	-		555.562	-	-		-	-	-	ciri_circ_5297,find_circ_926
circ_949	chrX	164385804	164400858	+	exon	ENSMUSG00000031380		429.618	-	-		-	603.381	587.917		-	-	-	ciri_circ_3896,find_circ_949
circ_960	chr8	93944198	93950431	+	exon	ENSMUSG00000031748		429.618	-	-		555.562	-	783.89		-	-	-	ciri_circ_3544,find_circ_960
circ_969	chr13	28608518	28669994	-	exon	ENSMUSG00000085936		429.618	-	-		-	804.508	-		-	-	477.102	ciri_circ_827,find_circ_969
circ_982	chr10	39639220	39641394	+	exon	ENSMUSG00000019842		429.618	-	681.298		555.562	-	-		-	-	-	ciri_circ_5458,find_circ_982
circ_990	chrX	113110176	113140786	-	exon	ENSMUSG00000025531		429.618	-	681.298		-	402.254	-		-	-	-	ciri_circ_3852,find_circ_990
circ_994	chr7	49452399	49464929	+	exon	ENSMUSG00000052512		429.618	-	-		370.374	-	-		-	-	477.102	ciri_circ_3231,find_circ_994
circ_999	chr17	64624528	64675247	+	exon	ENSMUSG00000024085		429.618	-	-		-	402.254	-		842.777	-	-	ciri_circ_1613,find_circ_999
circ_1017	chr17	75226967	75266610	+	exon	ENSMUSG00000001870		429.618	-	-		370.374	-	-		-	527.195	-	ciri_circ_1645,find_circ_1017
circ_1024	chr1	38534906	38539001	-	exon	ENSMUSG00000037138		644.427	-	-		370.374	-	-		842.777	-	-	ciri_circ_34,find_circ_1024
circ_1039	chr9	8634047	8680653	+	exon	ENSMUSG00000031997		644.427	-	-		-	-	-		561.851	1845.18	-	ciri_circ_3607,find_circ_1039
circ_1059	chr7	73435735	73449291	-	exon	ENSMUSG00000078671		429.618	-	908.397		-	-	-		-	527.195	-	ciri_circ_3252,find_circ_1059
circ_1063	chr6	56789219	56789700	-	exon	ENSMUSG00000059486		644.427	-	-		-	-	-		561.851	-	954.203	ciri_circ_3013,find_circ_1063
circ_1072	chr8	25640577	25641325	+	exon	ENSMUSG00000054823		429.618	428.923	-		555.562	-	-		-	-	-	ciri_circ_3424,find_circ_1072
circ_1079	chr19	7509348	7522207	+	exon	ENSMUSG00000024759		429.618	-	-		370.374	402.254	-		-	-	-	ciri_circ_1829,find_circ_1079
circ_1105	chrX	60304225	60321553	-	exon	ENSMUSG00000062949		429.618	-	-		-	-	391.945		561.851	-	-	ciri_circ_3828,find_circ_1105
circ_1116	chr1	37801720	37819640	-	exon	ENSMUSG00000060771		429.618	-	-		370.374	-	-		-	-	477.102	ciri_circ_30,find_circ_1116
circ_1138	chr4	107344512	107345191	+	exon	ENSMUSG00000057375		859.236	-	-		-	-	-		842.777	-	477.102	ciri_circ_2594,find_circ_1138
circ_1140	chr18	80420443	80434328	-	exon	ENSMUSG00000033323		429.618	428.923	-		-	402.254	-		-	-	-	ciri_circ_4579,find_circ_1140
circ_1156	chr15	3544025	3551685	-	exon	ENSMUSG00000055737		429.618	-	-		-	402.254	-		1404.63	-	-	ciri_circ_1106,find_circ_1156
circ_1191	chr18	5705043	5770564	+	exon	ENSMUSG00000024238		429.618	-	-		370.374	-	1371.81		-	-	-	ciri_circ_1690,find_circ_1191
circ_1200	chr19	38895987	38901415	+	exon	ENSMUSG00000048720		644.427	428.923	-		-	-	-		842.777	-	-	ciri_circ_1896,find_circ_1200
circ_1204	chr8	46103515	46105291	-	exon	ENSMUSG00000038291		429.618	1072.31	-		555.562	-	-		-	-	-	ciri_circ_3445,find_circ_1204
circ_1247	chr16	55812635	55819706	-	exon	ENSMUSG00000035356		429.618	-	454.199		-	-	587.917		-	-	-	ciri_circ_1312,find_circ_1247
circ_1257	chr8	73048294	73116485	-	exon	ENSMUSG00000004383		429.618	-	-		-	-	391.945		-	527.195	-	ciri_circ_3474,find_circ_1257
circ_1263	chr19	57650258	57657238	+	exon	ENSMUSG00000054843		429.618	428.923	-		370.374	-	-		-	-	-	ciri_circ_1943,find_circ_1263
circ_1271	chr4	137328713	137336129	-	exon	ENSMUSG00000006699		1288.85	-	-		555.562	-	-		-	790.793	-	ciri_circ_2635,find_circ_1271
circ_1274	chr6	67015725	67017663	+	exon	ENSMUSG00000036402		429.618	-	-		-	-	-		842.777	527.195	-	ciri_circ_3031,find_circ_1274
circ_1279	chr1	24711512	24731899	+	exon	ENSMUSG00000073725		429.618	-	-		555.562	-	587.917		-	-	-	ciri_circ_23,find_circ_1279
circ_1285	chr5	28358274	28362234	+	exon	ENSMUSG00000048271		429.618	-	454.199		-	-	-		561.851	-	-	ciri_circ_10893,find_circ_1285
circ_1316	chr12	31617075	31626876	-	exon	ENSMUSG00000020650		644.427	-	-		-	603.381	391.945		-	-	-	ciri_circ_654,find_circ_1316
circ_1332	chr5	102875695	102880882	+	exon	ENSMUSG00000057315		429.618	-	454.199		-	-	391.945		-	-	-	ciri_circ_2780,find_circ_1332
circ_1336	chr14	31106349	31107107	+	intron	ENSMUSG00000042323;ENSMUSG00000058351		429.618	-	-		-	-	391.945		-	-	477.102	ciri_circ_987,find_circ_1336
circ_1344	chr14	117186662	117186820	+	exon	ENSMUSG00000058571		429.618	-	-		-	402.254	-		1966.48	-	-	ciri_circ_10735,find_circ_1344
circ_1353	chr6	134484214	134486671	-	exon	ENSMUSG00000030201		429.618	-	-		370.374	402.254	-		-	-	-	ciri_circ_7401,find_circ_1353
circ_1395	chr2	27296123	27302110	-	exon	ENSMUSG00000009621		429.618	643.385	-		370.374	-	-		-	-	-	ciri_circ_4664,find_circ_1395
circ_1404	chr10	28465758	28560165	+	exon	ENSMUSG00000019889		429.618	428.923	-		-	-	-		-	-	477.102	ciri_circ_11383,find_circ_1404
circ_1412	chr6	37903533	37908364	+	exon	ENSMUSG00000029833		644.427	-	-		-	-	-		-	790.793	715.652	ciri_circ_2978,find_circ_1412
circ_1414	chr11	106566965	106568627	-	exon	ENSMUSG00000040548		644.427	-	-		555.562	-	587.917		-	-	-	ciri_circ_605,find_circ_1414
circ_1423	chrX	75791285	75793652	-	exon	ENSMUSG00000016382		644.427	428.923	-		-	-	391.945		-	-	-	ciri_circ_3835,find_circ_1423
circ_1435	chr7	130503722	130516168	-	exon	ENSMUSG00000030850		429.618	643.385	454.199		-	-	-		-	-	-	ciri_circ_3375,find_circ_1435
circ_1458	chr2	77074836	77173607	-	intergenic region	n/a		429.618	643.385	-		-	-	587.917		-	-	-	ciri_circ_2095,find_circ_1458
circ_1475	chr12	8728856	8729149	+	exon	ENSMUSG00000020594		429.618	-	-		370.374	-	-		-	-	477.102	ciri_circ_6656,find_circ_1475
circ_1487	chr4	81377964	81386478	-	exon	ENSMUSG00000028402		1074.04	-	-		-	402.254	391.945		-	-	-	ciri_circ_2554,find_circ_1487
circ_1517	chr16	30543402	30547469	-	exon	ENSMUSG00000022537		429.618	428.923	-		-	-	-		-	-	954.203	ciri_circ_1291,find_circ_1517
circ_1522	chr18	77673900	77674684	-	exon	ENSMUSG00000047466		644.427	-	454.199		-	804.508	-		-	-	-	ciri_circ_5868,find_circ_1522
circ_1534	chr6	57618613	57619634	+	exon	ENSMUSG00000108112		429.618	643.385	-		-	-	587.917		-	-	-	ciri_circ_3016,find_circ_1534
circ_1540	chr3	89043119	89043643	+	exon	ENSMUSG00000028053		429.618	643.385	-		-	-	391.945		-	-	-	ciri_circ_2379,find_circ_1540
circ_1547	chr15	62054794	62107465	+	intron	ENSMUSG00000097039		429.618	428.923	-		-	-	391.945		-	-	-	ciri_circ_1170,find_circ_1547
circ_1549	chr17	84386511	84398327	-	exon	ENSMUSG00000024251		859.236	-	-		555.562	402.254	-		-	-	-	ciri_circ_1664,find_circ_1549
circ_1554	chr11	21263199	21264871	+	exon	ENSMUSG00000020128		644.427	428.923	908.397		-	-	-		-	-	-	ciri_circ_422,find_circ_1554
circ_1574	chr12	50383400	50395040	-	exon	ENSMUSG00000002688		644.427	-	-		1111.12	-	-		561.851	-	-	ciri_circ_664,find_circ_1574
circ_1577	chr6	52757554	52758355	+	exon	ENSMUSG00000004535		644.427	-	-		555.562	-	783.89		-	-	-	ciri_circ_3010,find_circ_1577
circ_1599	chr4	31507508	31512064	-	intergenic region	n/a		859.236	-	-		-	402.254	391.945		-	-	-	ciri_circ_2506,find_circ_1599
circ_1615	chr6	12468789	12555726	-	exon	ENSMUSG00000032625		429.618	428.923	-		1481.5	-	-		-	-	-	ciri_circ_2915,find_circ_1615
circ_1619	chr8	127415570	127460384	+	exon	ENSMUSG00000025812		644.427	428.923	-		-	-	-		561.851	-	-	ciri_circ_3596,find_circ_1619
circ_1621	chr4	129178241	129182532	-	exon	ENSMUSG00000040928		429.618	428.923	-		-	-	-		561.851	-	-	ciri_circ_2621,find_circ_1621
circ_1626	chr11	121424926	121426703	+	exon	ENSMUSG00000039253		429.618	-	-		370.374	-	391.945		-	-	-	ciri_circ_623,find_circ_1626
circ_1637	chr1	106000931	106027531	+	exon	ENSMUSG00000038866		429.618	-	-		-	402.254	-		561.851	-	-	ciri_circ_3939,find_circ_1637
circ_1652	chr5	106666785	106669840	-	intron	ENSMUSG00000098302;ENSMUSG00000049606		429.618	-	-		-	402.254	391.945		-	-	-	ciri_circ_6152,find_circ_1652
circ_1660	chr10	82383763	82405166	+	intron	ENSMUSG00000073427		429.618	-	-		-	-	587.917		1123.7	-	-	ciri_circ_328,find_circ_1660
circ_1662	chr14	27438599	27450049	+	exon	ENSMUSG00000040651		644.427	-	-		-	-	-		-	1054.39	715.652	ciri_circ_982,find_circ_1662
circ_1669	chr2	34774773	34775065	+	intron	ENSMUSG00000026864		429.618	-	-		-	804.508	587.917		-	-	-	ciri_circ_2028,find_circ_1669
circ_1672	chr12	35078900	35082971	+	exon	ENSMUSG00000020590		429.618	-	-		-	-	-		-	790.793	954.203	ciri_circ_657,find_circ_1672
circ_1682	chr1	127901579	127925441	+	exon	ENSMUSG00000036104		429.618	-	-		-	-	391.945		-	527.195	-	ciri_circ_8508,find_circ_1682
circ_1700	chr15	66594807	66595199	+	exon	ENSMUSG00000072501		644.427	-	-		-	-	587.917		561.851	-	-	ciri_circ_8703,find_circ_1700
circ_1714	chr18	10574875	10586041	-	exon	ENSMUSG00000024293		429.618	-	-		555.562	-	-		-	527.195	-	ciri_circ_1704,find_circ_1714
circ_1718	chr15	58099711	58104566	-	exon	ENSMUSG00000022360		429.618	428.923	-		925.936	-	-		-	-	-	ciri_circ_1162,find_circ_1718
circ_1728	chr2	113563283	113603289	+	exon	ENSMUSG00000044042		429.618	428.923	-		-	402.254	-		-	-	-	ciri_circ_2136,find_circ_1728
circ_1731	chr5	5673549	5683417	-	exon	ENSMUSG00000015653		429.618	1286.77	-		-	-	783.89		-	-	-	ciri_circ_4920,find_circ_1731
circ_1779	chr12	110651491	110652194	+	exon	ENSMUSG00000018707		429.618	-	-		-	402.254	-		-	527.195	-	ciri_circ_797,find_circ_1779
circ_1796	chr17	70975459	70994784	-	intron	ENSMUSG00000097625		8807.17	-	-		9629.74	-	10582.5		-	-	-	ciri_circ_1629,find_circ_1796
circ_1823	chr16	8842968	8843243	+	exon	ENSMUSG00000022507		644.427	-	-		-	-	587.917		561.851	-	-	ciri_circ_1264,find_circ_1823
circ_1826	chr9	108541688	108542586	+	exon	ENSMUSG00000006673		429.618	-	-		-	-	391.945		842.777	-	-	ciri_circ_3767,find_circ_1826
circ_1829	chrX	139993298	139995228	-	exon	ENSMUSG00000031433		429.618	-	454.199		370.374	-	-		-	-	-	ciri_circ_3870,find_circ_1829
circ_1852	chr10	82383763	82400986	+	exon	ENSMUSG00000073427		859.236	-	-		-	-	391.945		561.851	-	-	ciri_circ_6560,find_circ_1852
circ_1878	chr1	89604598	89634294	+	exon	ENSMUSG00000055013		429.618	428.923	-		-	-	587.917		-	-	-	ciri_circ_81,find_circ_1878
circ_1880	chr3	86605870	86664590	+	exon	ENSMUSG00000028080		429.618	643.385	454.199		-	-	-		-	-	-	ciri_circ_2347,find_circ_1880
circ_1902	chr4	55366777	55385601	+	exon	ENSMUSG00000028426		429.618	-	-		555.562	1005.64	-		-	-	-	ciri_circ_2538,find_circ_1902
circ_1908	chr7	90160448	90165616	+	exon	ENSMUSG00000039361		429.618	-	-		-	-	391.945		-	-	477.102	ciri_circ_3280,find_circ_1908
circ_1917	chr11	49212695	49215798	+	exon	ENSMUSG00000046311		429.618	428.923	-		-	-	783.89		-	-	-	ciri_circ_463,find_circ_1917
circ_1934	chr11	22137838	22173006	-	exon	ENSMUSG00000042302		429.618	428.923	-		-	-	-		-	-	715.652	ciri_circ_8558,find_circ_1934
circ_1959	chr19	8999662	9002115	+	exon	ENSMUSG00000069833		429.618	-	-		-	804.508	587.917		-	-	-	ciri_circ_1831,find_circ_1959
circ_1967	chr16	94659497	94677592	+	exon	ENSMUSG00000022897		644.427	643.385	908.397		-	-	-		-	-	-	ciri_circ_1339,find_circ_1967
circ_1982	chr12	51716942	51723048	+	exon	ENSMUSG00000020955		429.618	-	454.199		-	603.381	-		-	-	-	ciri_circ_673,find_circ_1982
circ_1991	chr3	142603558	142660211	+	intergenic region	n/a		859.236	-	-		-	603.381	-		-	1054.39	-	ciri_circ_2460,find_circ_1991
circ_2004	chr11	53683202	53684301	-	exon	ENSMUSG00000020380		429.618	-	-		-	603.381	587.917		-	-	-	ciri_circ_479,find_circ_2004
circ_2027	chr10	42783442	42829039	+	exon	ENSMUSG00000019802		644.427	-	454.199		-	-	391.945		-	-	-	ciri_circ_261,find_circ_2027
circ_2028	chr7	90189150	90197020	+	exon	ENSMUSG00000039361		429.618	-	454.199		-	-	391.945		-	-	-	ciri_circ_3283,find_circ_2028
circ_2030	chr8	61049784	61054622	+	exon	ENSMUSG00000031644		429.618	428.923	681.298		-	-	-		-	-	-	ciri_circ_3454,find_circ_2030
circ_2037	chr4	108265818	108272383	-	exon	ENSMUSG00000034636		429.618	-	-		555.562	-	391.945		-	-	-	ciri_circ_2595,find_circ_2037
circ_2041	chr3	95032818	95036745	-	exon	ENSMUSG00000005625		429.618	428.923	-		-	402.254	-		-	-	-	ciri_circ_2392,find_circ_2041
circ_2043	chr5	23450152	23473653	+	exon	ENSMUSG00000029004		429.618	-	-		740.749	-	-		-	527.195	-	ciri_circ_2691,find_circ_2043
circ_2053	chr9	72842695	72858949	+	exon	ENSMUSG00000036030		429.618	-	-		-	-	-		842.777	-	477.102	ciri_circ_3715,find_circ_2053
circ_2073	chr8	25640577	25649703	+	exon	ENSMUSG00000054823		859.236	-	-		-	603.381	979.862		-	-	-	ciri_circ_3425,find_circ_2073
circ_2077	chr4	126123716	126125818	+	exon	ENSMUSG00000042608		1074.04	-	-		-	-	391.945		561.851	-	-	ciri_circ_2614,find_circ_2077
circ_2103	chr17	21573857	21652345	+	intergenic region	n/a		1074.04	-	454.199		555.562	-	-		-	-	-	ciri_circ_1446,find_circ_2103
circ_2109	chr13	29517413	29552395	-	exon	ENSMUSG00000006191		429.618	857.846	-		370.374	-	-		-	-	-	ciri_circ_830,find_circ_2109
circ_2124	chr3	5329435	5390452	+	exon	ENSMUSG00000025255		429.618	-	-		555.562	-	-		-	-	477.102	ciri_circ_7135,find_circ_2124
circ_2132	chr4	89380333	89399872	+	intergenic region	n/a		644.427	643.385	681.298		-	-	-		-	-	-	ciri_circ_2577,find_circ_2132
circ_2138	chr17	28410510	28429363	-	exon	ENSMUSG00000024222		429.618	-	908.397		555.562	-	-		-	-	-	ciri_circ_1486,find_circ_2138
circ_2148	chr4	89514014	89526703	+	intergenic region	n/a		429.618	-	454.199		-	603.381	-		-	-	-	ciri_circ_2582,find_circ_2148
circ_2156	chr17	64308622	64313118	-	exon	ENSMUSG00000024083		644.427	-	-		-	-	-		1966.48	-	954.203	ciri_circ_1608,find_circ_2156
circ_2162	chrX	143709648	143775134	+	exon	ENSMUSG00000031284		644.427	-	454.199		-	-	-		-	527.195	-	ciri_circ_3876,find_circ_2162
circ_2181	chr5	121377738	121379681	-	exon	ENSMUSG00000042726		859.236	-	-		370.374	402.254	-		-	-	-	ciri_circ_2840,find_circ_2181
circ_2188	chr1	69570493	69578047	-	exon	ENSMUSG00000025997		429.618	-	454.199		-	402.254	-		-	-	-	ciri_circ_5410,find_circ_2188
circ_2190	chr1	87378972	87380008	+	exon	ENSMUSG00000048000		859.236	-	-		-	-	-		-	527.195	715.652	ciri_circ_78,find_circ_2190
circ_2193	chr2	60001506	60006189	-	exon	ENSMUSG00000026987		429.618	-	-		-	402.254	-		-	1054.39	-	ciri_circ_2061,find_circ_2193
circ_2205	chr12	86952744	86960441	+	exon	ENSMUSG00000034157		429.618	-	-		-	603.381	391.945		-	-	-	ciri_circ_7805,find_circ_2205
circ_2230	chr7	16511193	16549207	-	exon	ENSMUSG00000058230		429.618	-	454.199		370.374	-	-		-	-	-	ciri_circ_3197,find_circ_2230
circ_2235	chr2	153320275	153320902	+	exon	ENSMUSG00000027475		429.618	-	-		555.562	-	-		-	-	715.652	ciri_circ_2227,find_circ_2235
circ_2237	chr18	75114790	75199265	+	exon	ENSMUSG00000035765		644.427	-	-		-	402.254	391.945		-	-	-	ciri_circ_1789,find_circ_2237
circ_2295	chr10	120849976	120871151	-	exon	ENSMUSG00000051236		644.427	-	454.199		370.374	-	-		-	-	-	ciri_circ_382,find_circ_2295
circ_2330	chr14	99210940	99243009	+	exon	ENSMUSG00000022064		429.618	-	-		555.562	-	391.945		-	-	-	ciri_circ_1071,find_circ_2330
circ_2338	chr7	110263880	110270081	+	exon	ENSMUSG00000031015		429.618	-	-		-	1005.64	-		-	-	477.102	ciri_circ_8355,find_circ_2338
circ_2356	chr4	143170036	143180991	-	exon	ENSMUSG00000057637		644.427	-	-		740.749	-	-		561.851	-	-	ciri_circ_2647,find_circ_2356
circ_2400	chr8	110978468	111009343	-	intergenic region	n/a		8377.55	9865.23	-		-	-	6859.03		-	-	-	ciri_circ_3573,find_circ_2400
circ_2403	chr12	73936190	73937800	+	exon	ENSMUSG00000021109		644.427	-	-		370.374	402.254	-		-	-	-	ciri_circ_747,find_circ_2403
circ_2437	chr4	126272678	126275257	+	exon	ENSMUSG00000028847		644.427	643.385	-		-	402.254	-		-	-	-	ciri_circ_2617,find_circ_2437
circ_2476	chr9	59394878	59405855	-	exon	ENSMUSG00000025234		1074.04	-	454.199		-	-	-		561.851	-	-	ciri_circ_3666,find_circ_2476
circ_2504	chr6	85341052	85342061	-	exon	ENSMUSG00000051343		429.618	-	-		370.374	-	391.945		-	-	-	ciri_circ_3049,find_circ_2504
circ_2520	chr8	70033179	70033628	-	exon	ENSMUSG00000031858		429.618	428.923	-		-	-	-		842.777	-	-	ciri_circ_3469,find_circ_2520
circ_2530	chrX	98726005	98732466	-	exon	ENSMUSG00000031214		429.618	428.923	-		-	-	-		-	527.195	-	ciri_circ_5366,find_circ_2530
circ_2539	chr15	8300695	8307024	-	exon	ENSMUSG00000022141		644.427	-	-		-	603.381	391.945		-	-	-	ciri_circ_1113,find_circ_2539
circ_2562	chr10	70154708	70175167	+	exon	ENSMUSG00000048701		429.618	-	-		-	-	391.945		-	-	477.102	ciri_circ_306,find_circ_2562
circ_2567	chr2	91766447	91773747	+	exon	ENSMUSG00000040506		1074.04	-	1135.5		-	402.254	-		-	-	-	ciri_circ_2110,find_circ_2567
circ_2571	chr11	120132677	120134882	-	exon	ENSMUSG00000061306		429.618	-	681.298		-	-	-		-	-	715.652	ciri_circ_5574,find_circ_2571
circ_2584	chr19	32792549	32800099	+	exon	ENSMUSG00000013663		429.618	428.923	-		-	-	-		-	527.195	-	ciri_circ_1877,find_circ_2584
circ_2591	chr6	31418931	31431249	+	exon	ENSMUSG00000025609		859.236	-	681.298		-	-	-		-	-	715.652	ciri_circ_2960,find_circ_2591
circ_2592	chr6	31093363	31181149	-	intergenic region	n/a		429.618	-	-		1111.12	1609.02	-		-	-	-	ciri_circ_2948,find_circ_2592
circ_2607	chr4	34839332	34852406	-	intron	ENSMUSG00000039967		429.618	-	-		-	-	-		561.851	-	477.102	ciri_circ_7207,find_circ_2607
circ_2615	chr6	146371253	146376182	-	exon	ENSMUSG00000030287		429.618	-	-		-	-	587.917		-	527.195	-	ciri_circ_3183,find_circ_2615
circ_2617	chr15	66604027	66637032	+	exon	ENSMUSG00000072501		644.427	-	681.298		-	-	391.945		-	-	-	ciri_circ_1184,find_circ_2617
circ_2636	chr1	73952421	73953950	-	exon	ENSMUSG00000055322		429.618	-	-		370.374	-	587.917		-	-	-	ciri_circ_6473,find_circ_2636
circ_2637	chrX	102428115	102432597	-	exon	ENSMUSG00000067567		429.618	-	-		370.374	402.254	-		-	-	-	ciri_circ_3846,find_circ_2637
circ_2641	chr13	43412411	43425214	-	exon	ENSMUSG00000038546		644.427	-	-		-	603.381	-		-	-	715.652	ciri_circ_847,find_circ_2641
circ_2662	chr11	68829915	68845424	-	exon	ENSMUSG00000018736		644.427	428.923	-		-	-	-		-	-	477.102	ciri_circ_505,find_circ_2662
circ_2664	chr4	33320519	33331082	+	exon	ENSMUSG00000028274		429.618	-	-		-	402.254	-		-	-	715.652	ciri_circ_2508,find_circ_2664
circ_2667	chr9	100495521	100508672	-	exon	ENSMUSG00000032475		644.427	-	-		-	603.381	-		-	-	477.102	ciri_circ_3751,find_circ_2667
circ_2684	chr18	6111685	6112439	-	exon	ENSMUSG00000041225		429.618	-	-		370.374	402.254	-		-	-	-	ciri_circ_8006,find_circ_2684
circ_2687	chr14	103247747	103248566	-	exon	ENSMUSG00000033004		429.618	-	-		-	-	391.945		561.851	-	-	ciri_circ_1073,find_circ_2687
circ_2696	chr11	119431588	119435103	+	exon	ENSMUSG00000070327		429.618	643.385	-		-	-	-		-	527.195	-	ciri_circ_11057,find_circ_2696
circ_2713	chr7	114240625	114246842	-	exon	ENSMUSG00000030754		429.618	428.923	-		370.374	-	-		-	-	-	ciri_circ_3332,find_circ_2713
circ_2716	chr10	58454573	58457784	+	exon	ENSMUSG00000003226		859.236	-	-		-	-	587.917		-	790.793	-	ciri_circ_288,find_circ_2716
circ_2738	chr3	96754335	96775841	+	exon	ENSMUSG00000028098		429.618	-	454.199		-	-	-		-	-	477.102	ciri_circ_2395,find_circ_2738
circ_2741	chr4	120462013	120483833	+	exon	ENSMUSG00000000085		429.618	-	-		740.749	-	-		-	-	477.102	ciri_circ_7238,find_circ_2741
circ_2751	chr2	6721417	6784388	-	intron	ENSMUSG00000002107		429.618	-	-		370.374	402.254	-		-	-	-	ciri_circ_1963,find_circ_2751
circ_2808	chr14	59226308	59235420	+	exon	ENSMUSG00000035469		429.618	428.923	-		370.374	-	-		-	-	-	ciri_circ_1021,find_circ_2808
circ_2811	chr7	132771578	132779385	-	exon	ENSMUSG00000030956		644.427	-	454.199		-	402.254	-		-	-	-	ciri_circ_3379,find_circ_2811
circ_2814	chr7	44105489	44190424	+	intergenic region	n/a		644.427	643.385	-		-	402.254	-		-	-	-	ciri_circ_3222,find_circ_2814
circ_2815	chr1	177059334	177131096	-	exon	ENSMUSG00000019699		644.427	428.923	-		-	-	-		-	-	477.102	ciri_circ_176,find_circ_2815
circ_2816	chr3	115978644	115984974	-	exon	ENSMUSG00000054414		429.618	-	-		-	-	-		842.777	-	477.102	ciri_circ_2419,find_circ_2816
circ_2818	chrX	109149915	109154386	+	exon	ENSMUSG00000031246		644.427	428.923	-		370.374	-	-		-	-	-	ciri_circ_3850,find_circ_2818
circ_2819	chr11	60553714	60554394	+	exon	ENSMUSG00000042650		859.236	-	681.298		-	-	-		-	790.793	-	ciri_circ_491,find_circ_2819
circ_2833	chr11	104356684	104378826	-	exon	ENSMUSG00000018412		429.618	857.846	-		-	-	-		561.851	-	-	ciri_circ_596,find_circ_2833
circ_2866	chr19	50241948	50262367	-	exon	ENSMUSG00000043531		644.427	428.923	681.298		-	-	-		-	-	-	ciri_circ_1928,find_circ_2866
circ_2872	chr9	56227102	56241344	-	exon	ENSMUSG00000074305		429.618	-	-		370.374	-	-		-	527.195	-	ciri_circ_3660,find_circ_2872
circ_2874	chr1	66772906	66807604	-	exon	ENSMUSG00000026004		429.618	-	-		-	-	391.945		-	-	477.102	ciri_circ_56,find_circ_2874
circ_2877	chr5	137321394	137323171	-	exon	ENSMUSG00000037344		429.618	-	-		-	-	-		-	527.195	477.102	ciri_circ_2880,find_circ_2877
circ_2884	chr18	56728401	56733337	+	exon	ENSMUSG00000024590		859.236	-	-		-	402.254	-		-	527.195	-	ciri_circ_1759,find_circ_2884
circ_2886	chr4	152020190	152020708	-	exon	ENSMUSG00000028952		644.427	-	-		-	-	-		842.777	527.195	-	ciri_circ_2670,find_circ_2886
circ_2895	chr12	84934152	84951381	-	exon	ENSMUSG00000042350		-	428.923	-		370.374	-	-		1123.7	-	-	ciri_circ_4175,find_circ_2895
circ_2904	chr13	44970046	44993738	-	exon	ENSMUSG00000057531		-	643.385	454.199		555.562	-	-		-	-	-	ciri_circ_4218,find_circ_2904
circ_2908	chr8	68645799	68719157	-	exon	ENSMUSG00000036356		-	428.923	454.199		370.374	-	-		-	-	-	ciri_circ_5196,find_circ_2908
circ_2909	chr14	79369078	79377521	-	exon	ENSMUSG00000022020		-	643.385	-		-	402.254	-		-	527.195	-	ciri_circ_4312,find_circ_2909
circ_2911	chr10	80766163	80771366	+	exon	ENSMUSG00000061589		-	428.923	-		-	603.381	-		-	527.195	-	ciri_circ_4019,find_circ_2911
circ_2916	chr2	165828208	165842877	-	exon	ENSMUSG00000039671		-	428.923	454.199		-	-	-		561.851	-	-	ciri_circ_5989,find_circ_2916
circ_2917	chr9	99040921	99042669	-	exon	ENSMUSG00000032462		-	643.385	-		-	402.254	-		1123.7	-	-	ciri_circ_5320,find_circ_2917
circ_2919	chr2	24877455	24884702	-	exon	ENSMUSG00000036893		-	428.923	-		-	-	391.945		-	-	715.652	ciri_circ_8827,find_circ_2919
circ_2924	chr7	81893799	81900423	-	exon	ENSMUSG00000025104		-	428.923	-		-	-	391.945		-	-	477.102	ciri_circ_3268,find_circ_2924
circ_2933	chr9	80092267	80103764	+	exon	ENSMUSG00000034252		-	428.923	-		-	-	-		-	1054.39	477.102	ciri_circ_3726,find_circ_2933
circ_2934	chr10	12633944	12643611	-	exon	ENSMUSG00000019820		-	428.923	-		370.374	402.254	-		-	-	-	ciri_circ_3976,find_circ_2934
circ_2944	chr18	32191901	32212168	+	exon	ENSMUSG00000024383		-	428.923	454.199		-	-	-		561.851	-	-	ciri_circ_1729,find_circ_2944
circ_2954	chr4	108478873	108491464	+	exon	ENSMUSG00000034610		-	1072.31	-		-	402.254	391.945		-	-	-	ciri_circ_2597,find_circ_2954
circ_2958	chr4	130668925	130669203	+	exon	ENSMUSG00000028580		-	428.923	-		-	-	-		561.851	-	954.203	ciri_circ_4899,find_circ_2958
circ_2967	chr14	60239481	60247466	-	exon	ENSMUSG00000063895		-	643.385	454.199		370.374	-	-		-	-	-	ciri_circ_1039,find_circ_2967
circ_2975	chr10	83506598	83508732	-	exon	ENSMUSG00000020256		-	428.923	-		370.374	-	-		561.851	-	-	ciri_circ_4022,find_circ_2975
circ_2976	chr5	107266194	107269099	-	intron	ENSMUSG00000029287		-	428.923	908.397		370.374	-	-		-	-	-	ciri_circ_4965,find_circ_2976
circ_2983	chr15	100525567	100528546	-	exon	ENSMUSG00000009733		-	428.923	-		-	402.254	-		-	527.195	-	ciri_circ_4381,find_circ_2983
circ_2989	chr3	103928351	103930154	+	exon	ENSMUSG00000044098		-	428.923	-		-	-	-		842.777	-	477.102	ciri_circ_9505,find_circ_2989
circ_2996	chr3	100578476	100591948	-	exon	ENSMUSG00000008763		-	1072.31	454.199		-	-	391.945		-	-	-	ciri_circ_2400,find_circ_2996
circ_2997	chr15	68212593	68224943	-	exon	ENSMUSG00000022335		-	857.846	-		555.562	-	391.945		-	-	-	ciri_circ_4358,find_circ_2997
circ_2998	chr3	142828881	142853714	-	exon	ENSMUSG00000004591		-	857.846	454.199		-	804.508	-		-	-	-	ciri_circ_4834,find_circ_2998
circ_3000	chr6	65855949	65928021	+	exon	ENSMUSG00000029913		-	428.923	-		370.374	-	783.89		-	-	-	ciri_circ_3024,find_circ_3000
circ_3023	chr12	72783683	72793849	+	exon	ENSMUSG00000021096		-	428.923	454.199		-	1206.76	-		-	-	-	ciri_circ_4162,find_circ_3023
circ_3026	chr1	84776317	84794327	-	exon	ENSMUSG00000026219		-	428.923	-		-	-	587.917		-	-	954.203	ciri_circ_75,find_circ_3026
circ_3031	chr8	105178593	105194591	+	exon	ENSMUSG00000031885		-	428.923	-		-	-	-		561.851	527.195	-	ciri_circ_8392,find_circ_3031
circ_3041	chr8	3507149	3511810	+	exon	ENSMUSG00000004567		-	857.846	-		-	402.254	587.917		-	-	-	ciri_circ_5178,find_circ_3041
circ_3053	chr3	144759171	144817297	-	intergenic region	n/a		-	4932.62	2270.99		-	-	-		2809.26	-	-	ciri_circ_2473,find_circ_3053
circ_3068	chr13	34009601	34017146	+	exon	ENSMUSG00000021408		-	643.385	-		555.562	-	-		-	527.195	-	ciri_circ_6707,find_circ_3068
circ_3089	chr14	33343229	33345116	+	intron	ENSMUSG00000063506		-	428.923	-		1111.12	-	-		-	527.195	-	ciri_circ_989,find_circ_3089
circ_3093	chr13	103868043	103884260	-	exon	ENSMUSG00000021709		-	428.923	454.199		-	-	-		-	527.195	-	ciri_circ_4258,find_circ_3093
circ_3118	chr14	59351147	59381484	-	intergenic region	n/a		-	5147.08	5223.28		-	-	2939.59		-	-	-	ciri_circ_1034,find_circ_3118
circ_3124	chr7	73497707	73519708	-	exon	ENSMUSG00000078671		-	643.385	-		555.562	-	587.917		-	-	-	ciri_circ_5127,find_circ_3124
circ_3126	chr4	123394070	123399509	-	exon	ENSMUSG00000028649		-	428.923	-		-	402.254	391.945		-	-	-	ciri_circ_4894,find_circ_3126
circ_3137	chr10	26869921	26889872	+	exon	ENSMUSG00000039031		-	643.385	-		-	402.254	-		-	1054.39	-	ciri_circ_3982,find_circ_3137
circ_3151	chr11	107296199	107337560	-	exon	ENSMUSG00000040430		-	428.923	-		555.562	402.254	-		-	-	-	ciri_circ_609,find_circ_3151
circ_3163	chr2	166865680	166869043	+	exon	ENSMUSG00000074582		-	428.923	-		-	-	-		561.851	527.195	-	ciri_circ_4772,find_circ_3163
circ_3178	chr14	30765963	30774125	+	exon	ENSMUSG00000006527		-	857.846	-		370.374	402.254	-		-	-	-	ciri_circ_4280,find_circ_3178
circ_3184	chr16	31793504	31805734	+	exon	ENSMUSG00000022770		-	428.923	-		-	603.381	391.945		-	-	-	ciri_circ_7933,find_circ_3184
circ_3207	chr2	139977607	140008819	-	exon	ENSMUSG00000039033		-	428.923	454.199		370.374	-	-		-	-	-	ciri_circ_4745,find_circ_3207
circ_3219	chr7	46850178	46851058	+	exon	ENSMUSG00000063229		-	857.846	-		-	603.381	-		842.777	-	-	ciri_circ_3230,find_circ_3219
circ_3222	chr17	79650302	79681682	+	exon	ENSMUSG00000036368		-	643.385	681.298		-	-	-		-	527.195	-	ciri_circ_1658,find_circ_3222
circ_3239	chr10	63015802	63017610	-	exon	ENSMUSG00000020069		-	428.923	681.298		-	-	-		-	527.195	-	ciri_circ_4009,find_circ_3239
circ_3254	chrX	49051732	49080751	-	exon	ENSMUSG00000031109		-	643.385	454.199		-	-	-		561.851	-	-	ciri_circ_10976,find_circ_3254
circ_3256	chr19	45773662	45776219	-	exon	ENSMUSG00000025220		-	643.385	-		370.374	-	391.945		-	-	-	ciri_circ_4631,find_circ_3256
circ_3268	chr8	86043710	86049819	+	exon	ENSMUSG00000036879		-	857.846	-		370.374	-	-		-	527.195	-	ciri_circ_5221,find_circ_3268
circ_3273	chr7	98979636	99016674	-	exon	ENSMUSG00000035354		-	428.923	454.199		370.374	-	-		-	-	-	ciri_circ_5145,find_circ_3273
circ_3278	chr4	107344512	107350538	+	exon	ENSMUSG00000057375		-	428.923	-		370.374	402.254	-		-	-	-	ciri_circ_4883,find_circ_3278
circ_3284	chr2	139985129	140057499	-	exon	ENSMUSG00000039033		-	428.923	-		740.749	-	-		-	527.195	-	ciri_circ_4746,find_circ_3284
circ_3285	chr10	53611352	53626034	-	exon	ENSMUSG00000058298		-	1286.77	-		-	1005.64	-		-	-	715.652	ciri_circ_4002,find_circ_3285
circ_3286	chr16	11199385	11201430	-	exon	ENSMUSG00000005846		-	643.385	-		555.562	603.381	-		-	-	-	ciri_circ_4389,find_circ_3286
circ_3324	chr3	152420015	152428847	+	intron	ENSMUSG00000039068		-	1286.77	681.298		370.374	-	-		-	-	-	ciri_circ_4845,find_circ_3324
circ_3329	chr4	108478873	108486617	+	exon	ENSMUSG00000034610		-	428.923	-		-	-	391.945		-	790.793	-	ciri_circ_4884,find_circ_3329
circ_3338	chr3	101425451	101427440	+	exon	ENSMUSG00000042035		-	428.923	454.199		-	402.254	-		-	-	-	ciri_circ_4821,find_circ_3338
circ_3346	chr9	122136906	122137601	+	exon	ENSMUSG00000038145		-	428.923	681.298		-	-	391.945		-	-	-	ciri_circ_6409,find_circ_3346
circ_3349	chr17	56905712	56927172	-	exon	ENSMUSG00000024212		-	428.923	-		370.374	-	-		561.851	-	-	ciri_circ_1596,find_circ_3349
circ_3365	chr16	32352799	32376024	+	exon	ENSMUSG00000053774		-	428.923	-		-	-	-		-	1054.39	477.102	ciri_circ_10352,find_circ_3365
circ_3379	chr4	150468695	150534945	+	exon	ENSMUSG00000039852		-	643.385	-		-	-	783.89		561.851	-	-	ciri_circ_4913,find_circ_3379
circ_3389	chr2	113582098	113593216	+	exon	ENSMUSG00000044042		-	428.923	-		-	-	391.945		-	-	477.102	ciri_circ_2138,find_circ_3389
circ_3390	chr1	179999362	180040200	+	exon	ENSMUSG00000026490		-	428.923	681.298		-	603.381	-		-	-	-	ciri_circ_3966,find_circ_3390
circ_3407	chr9	22012679	22013166	+	exon	ENSMUSG00000003402		-	428.923	-		555.562	-	-		-	527.195	-	ciri_circ_5261,find_circ_3407
circ_3422	chr11	79384175	79395961	+	exon	ENSMUSG00000020716		-	643.385	-		-	-	-		561.851	-	715.652	ciri_circ_4079,find_circ_3422
circ_3423	chr12	35078900	35092913	+	exon	ENSMUSG00000020590		-	428.923	-		-	-	391.945		-	790.793	-	ciri_circ_659,find_circ_3423
circ_3443	chr16	20106663	20120298	+	exon	ENSMUSG00000062901		-	643.385	-		740.749	1005.64	-		-	-	-	ciri_circ_4400,find_circ_3443
circ_3444	chr11	35910176	35915285	-	exon	ENSMUSG00000018849		-	428.923	-		-	402.254	391.945		-	-	-	ciri_circ_4050,find_circ_3444
circ_3447	chr2	24884146	24887069	-	exon	ENSMUSG00000036893		-	643.385	-		555.562	-	-		561.851	-	-	ciri_circ_2004,find_circ_3447
circ_3473	chr2	104765959	104780260	-	exon	ENSMUSG00000074994		-	428.923	-		-	402.254	-		-	-	715.652	ciri_circ_7086,find_circ_3473
circ_3474	chr7	45447898	45451914	+	exon	ENSMUSG00000003865		-	428.923	-		-	-	-		-	527.195	477.102	ciri_circ_5114,find_circ_3474
circ_3479	chr2	120901602	120907025	-	exon	ENSMUSG00000027272		-	643.385	-		-	-	391.945		-	-	477.102	ciri_circ_4726,find_circ_3479
circ_3492	chr15	68165753	68170223	-	exon	ENSMUSG00000022335		-	643.385	454.199		-	-	391.945		-	-	-	ciri_circ_4357,find_circ_3492
circ_3495	chr6	42486283	42521000	+	intergenic region	n/a		-	643.385	454.199		740.749	-	-		-	-	-	ciri_circ_5033,find_circ_3495
circ_3498	chr11	21277675	21278060	+	exon	ENSMUSG00000020128		-	428.923	-		370.374	-	-		561.851	-	-	ciri_circ_4042,find_circ_3498
circ_3501	chr5	142733550	142740264	-	exon	ENSMUSG00000039477		-	428.923	454.199		-	-	587.917		-	-	-	ciri_circ_4997,find_circ_3501
circ_3515	chr2	126823976	126825789	-	exon	ENSMUSG00000027365		-	428.923	-		-	-	391.945		-	-	477.102	ciri_circ_5966,find_circ_3515
circ_3516	chr9	106183616	106186512	+	exon	ENSMUSG00000020257		-	428.923	-		740.749	-	-		842.777	-	-	ciri_circ_3761,find_circ_3516
circ_3520	chr9	56316380	56318820	-	intron	ENSMUSG00000074305		-	428.923	454.199		-	-	-		-	-	477.102	ciri_circ_11740,find_circ_3520
circ_3528	chr11	121285422	121298855	+	exon	ENSMUSG00000039275		-	643.385	-		-	-	-		561.851	527.195	-	ciri_circ_4123,find_circ_3528
circ_3536	chr11	50301758	50308929	-	exon	ENSMUSG00000020368		-	643.385	-		555.562	603.381	-		-	-	-	ciri_circ_4055,find_circ_3536
circ_3544	chr8	106078604	106083973	+	exon	ENSMUSG00000031902		-	428.923	-		-	402.254	-		-	1054.39	-	ciri_circ_5234,find_circ_3544
circ_3545	chr2	157099386	157107565	-	exon	ENSMUSG00000027639		-	857.846	-		-	603.381	391.945		-	-	-	ciri_circ_4761,find_circ_3545
circ_3551	chr13	15659962	15662530	+	exon	ENSMUSG00000021318		-	428.923	-		370.374	402.254	-		-	-	-	ciri_circ_7821,find_circ_3551
circ_3563	chr9	55495562	55500164	-	exon	ENSMUSG00000032314		-	428.923	-		370.374	-	-		-	-	1192.75	ciri_circ_3657,find_circ_3563
circ_3592	chr18	62080438	62082823	-	intergenic region	n/a		-	857.846	908.397		370.374	-	-		-	-	-	ciri_circ_4565,find_circ_3592
circ_3595	chr6	120862855	120865724	+	exon	ENSMUSG00000009112		-	428.923	-		-	402.254	-		561.851	-	-	ciri_circ_10923,find_circ_3595
circ_3597	chr7	112271230	112271569	+	exon	ENSMUSG00000038244		-	428.923	-		925.936	603.381	-		-	-	-	ciri_circ_5154,find_circ_3597
circ_3598	chr2	24852665	24863908	-	exon	ENSMUSG00000036893		-	428.923	-		-	-	-		-	527.195	477.102	ciri_circ_4658,find_circ_3598
circ_3600	chr12	51633579	51661713	-	exon	ENSMUSG00000020954		-	643.385	-		-	402.254	-		561.851	-	-	ciri_circ_4144,find_circ_3600
circ_3608	chr14	105287617	105304836	+	exon	ENSMUSG00000053253		-	643.385	454.199		740.749	-	-		-	-	-	ciri_circ_4323,find_circ_3608
circ_3623	chr15	35617598	35674952	+	exon	ENSMUSG00000037646		-	428.923	-		555.562	-	-		-	-	477.102	ciri_circ_4346,find_circ_3623
circ_3624	chr19	59935606	59937430	-	exon	ENSMUSG00000040022		-	643.385	-		370.374	402.254	-		-	-	-	ciri_circ_4639,find_circ_3624
circ_3631	chr1	82858356	82875450	+	exon	ENSMUSG00000026159		-	428.923	-		-	402.254	-		842.777	-	-	ciri_circ_3933,find_circ_3631
circ_3637	chr16	38184435	38193994	+	exon	ENSMUSG00000022812		-	857.846	-		370.374	-	783.89		-	-	-	ciri_circ_4411,find_circ_3637
circ_3644	chr2	119919626	119924086	+	exon	ENSMUSG00000033943		-	428.923	454.199		-	-	391.945		-	-	-	ciri_circ_4723,find_circ_3644
circ_3646	chr19	27813578	27849969	-	exon	ENSMUSG00000040929		-	428.923	681.298		-	-	587.917		-	-	-	ciri_circ_5880,find_circ_3646
circ_3647	chr11	75543158	75545830	+	exon	ENSMUSG00000038178		-	643.385	681.298		-	-	587.917		-	-	-	ciri_circ_4074,find_circ_3647
circ_3649	chr1	11123121	11142797	+	exon	ENSMUSG00000048960		-	643.385	-		-	402.254	-		561.851	-	-	ciri_circ_3914,find_circ_3649
circ_3653	chr17	24218170	24220133	-	exon	ENSMUSG00000024118		-	428.923	-		370.374	603.381	-		-	-	-	ciri_circ_6902,find_circ_3653
circ_3656	chr2	12974369	12994890	+	exon	ENSMUSG00000026730		-	428.923	454.199		-	402.254	-		-	-	-	ciri_circ_4648,find_circ_3656
circ_3669	chr2	12355277	12410080	-	exon	ENSMUSG00000026767		-	643.385	454.199		555.562	-	-		-	-	-	ciri_circ_1965,find_circ_3669
circ_3682	chr5	137523799	137524413	+	exon	ENSMUSG00000029714		-	428.923	-		555.562	-	783.89		-	-	-	ciri_circ_4993,find_circ_3682
circ_3686	chr2	135907499	135910244	+	exon	ENSMUSG00000039943		-	428.923	-		-	402.254	-		561.851	-	-	ciri_circ_4743,find_circ_3686
circ_3688	chr2	72938070	72971514	-	exon	ENSMUSG00000027109		-	428.923	-		-	402.254	-		842.777	-	-	ciri_circ_4697,find_circ_3688
circ_3711	chr9	54917859	54918246	+	exon	ENSMUSG00000035878		-	643.385	-		-	402.254	-		842.777	-	-	ciri_circ_5281,find_circ_3711
circ_3723	chr10	12525338	12538213	-	exon	ENSMUSG00000019820		-	857.846	-		-	402.254	-		561.851	-	-	ciri_circ_3975,find_circ_3723
circ_3745	chr2	6664115	6721613	-	exon	ENSMUSG00000002107		-	643.385	-		370.374	-	391.945		-	-	-	ciri_circ_4644,find_circ_3745
circ_3748	chr10	28263501	28263772	+	exon	ENSMUSG00000019889		-	428.923	-		740.749	804.508	-		-	-	-	ciri_circ_6530,find_circ_3748
circ_3751	chr13	89940962	90001084	-	exon	ENSMUSG00000021615		-	643.385	-		-	804.508	391.945		-	-	-	ciri_circ_4249,find_circ_3751
circ_3763	chr15	58784883	58797245	-	exon	ENSMUSG00000062373		-	643.385	-		-	-	783.89		842.777	-	-	ciri_circ_1165,find_circ_3763
circ_3766	chr10	28465758	28466060	+	exon	ENSMUSG00000019889		-	428.923	-		-	603.381	587.917		-	-	-	ciri_circ_7689,find_circ_3766
circ_3773	chr6	31080865	31093595	-	intergenic region	n/a		-	428.923	454.199		-	-	-		-	527.195	-	ciri_circ_6197,find_circ_3773
circ_3777	chr13	104366794	104413810	+	exon	ENSMUSG00000046169		-	428.923	681.298		555.562	-	-		-	-	-	ciri_circ_4261,find_circ_3777
circ_3802	chr10	43997052	43999347	-	exon	ENSMUSG00000019866		-	428.923	-		-	-	391.945		-	790.793	-	ciri_circ_3992,find_circ_3802
circ_3818	chr11	86548783	86561376	+	exon	ENSMUSG00000020513		-	428.923	-		370.374	-	-		-	790.793	-	ciri_circ_6630,find_circ_3818
circ_3821	chr13	49615555	49618295	+	exon	ENSMUSG00000021390		-	428.923	-		-	804.508	-		842.777	-	-	ciri_circ_4221,find_circ_3821
circ_3825	chr5	34419998	34444913	+	exon	ENSMUSG00000037210		-	428.923	454.199		555.562	-	-		-	-	-	ciri_circ_2729,find_circ_3825
circ_3836	chr16	11230510	11239096	-	exon	ENSMUSG00000062203		-	643.385	-		555.562	402.254	-		-	-	-	ciri_circ_1269,find_circ_3836
circ_3907	chr6	143180587	143186634	+	exon	ENSMUSG00000030275		-	428.923	-		-	603.381	-		-	1054.39	-	ciri_circ_8330,find_circ_3907
circ_3922	chr13	43406612	43461823	-	exon	ENSMUSG00000038546		-	428.923	-		740.749	-	391.945		-	-	-	ciri_circ_4214,find_circ_3922
circ_3928	chr5	107177805	107266350	-	exon	ENSMUSG00000029287		-	643.385	-		555.562	-	391.945		-	-	-	ciri_circ_4963,find_circ_3928
circ_3932	chr10	52429193	52436739	+	exon	ENSMUSG00000023068		-	643.385	-		-	402.254	1175.83		-	-	-	ciri_circ_4001,find_circ_3932
circ_3956	chr10	88400652	88414598	+	exon	ENSMUSG00000035311		-	643.385	454.199		-	-	-		-	-	477.102	ciri_circ_337,find_circ_3956
circ_3965	chr2	77089070	77173607	-	intergenic region	n/a		-	643.385	-		370.374	603.381	-		-	-	-	ciri_circ_4700,find_circ_3965
circ_3971	chr13	89991073	90001084	-	exon	ENSMUSG00000021615		-	428.923	-		-	-	-		-	790.793	477.102	ciri_circ_913,find_circ_3971
circ_3983	chr19	43901070	43912389	-	exon	ENSMUSG00000025195		-	428.923	454.199		-	603.381	-		-	-	-	ciri_circ_5888,find_circ_3983
circ_3985	chr4	155527413	155543193	+	exon	ENSMUSG00000029064		-	428.923	908.397		-	-	-		-	-	954.203	ciri_circ_4917,find_circ_3985
circ_3986	chr15	58052224	58064180	-	exon	ENSMUSG00000022361		-	428.923	454.199		-	-	-		-	527.195	-	ciri_circ_4352,find_circ_3986
circ_4007	chr12	51623176	51661713	-	exon	ENSMUSG00000020954		-	428.923	-		740.749	-	-		1123.7	-	-	ciri_circ_4143,find_circ_4007
circ_4009	chr12	40631522	40649489	+	exon	ENSMUSG00000035954		-	643.385	-		-	-	-		-	790.793	954.203	ciri_circ_4141,find_circ_4009
circ_4036	chr5	64311059	64316515	+	exon	ENSMUSG00000029174		-	428.923	-		-	-	-		561.851	790.793	-	ciri_circ_4936,find_circ_4036
circ_4054	chr1	165604610	165608604	-	exon	ENSMUSG00000026566		-	428.923	454.199		-	402.254	-		-	-	-	ciri_circ_3960,find_circ_4054
circ_4055	chr5	107130461	107142546	-	exon	ENSMUSG00000029287		-	428.923	-		-	-	391.945		842.777	-	-	ciri_circ_4961,find_circ_4055
circ_4057	chr14	99186481	99211070	+	exon	ENSMUSG00000022064		-	428.923	681.298		-	-	-		-	-	715.652	ciri_circ_4319,find_circ_4057
circ_4064	chr18	12871078	12892289	-	exon	ENSMUSG00000044252		-	857.846	-		370.374	-	-		-	1054.39	-	ciri_circ_4539,find_circ_4064
circ_4069	chr1	33783041	33786532	-	exon	ENSMUSG00000042197		-	428.923	-		-	402.254	-		-	-	715.652	ciri_circ_3917,find_circ_4069
circ_4094	chr15	81319598	81329166	-	exon	ENSMUSG00000022404		-	643.385	-		555.562	804.508	-		-	-	-	ciri_circ_4368,find_circ_4094
circ_4100	chr12	101043443	101049818	-	exon	ENSMUSG00000041846		-	643.385	-		-	402.254	-		842.777	-	-	ciri_circ_779,find_circ_4100
circ_4102	chr2	91562754	91563113	+	exon	ENSMUSG00000040549		-	428.923	454.199		370.374	-	-		-	-	-	ciri_circ_4711,find_circ_4102
circ_4109	chr7	100626552	100639495	+	exon	ENSMUSG00000030704		-	428.923	-		370.374	-	-		-	-	477.102	ciri_circ_3299,find_circ_4109
circ_4123	chr7	34116594	34119206	-	exon	ENSMUSG00000036459		-	857.846	-		370.374	-	391.945		-	-	-	ciri_circ_3208,find_circ_4123
circ_4133	chr9	57019904	57027481	+	exon	ENSMUSG00000032290		-	428.923	454.199		-	-	-		-	-	477.102	ciri_circ_5283,find_circ_4133
circ_4163	chr8	22414716	22415003	+	exon	ENSMUSG00000031533		-	428.923	681.298		555.562	-	-		-	-	-	ciri_circ_6307,find_circ_4163
circ_4164	chr9	36909629	36911263	-	exon	ENSMUSG00000035934		-	428.923	-		370.374	-	-		-	527.195	-	ciri_circ_5270,find_circ_4164
circ_4176	chr13	116922570	116927391	-	exon	ENSMUSG00000021725		-	428.923	-		-	-	391.945		1123.7	-	-	ciri_circ_4264,find_circ_4176
circ_4184	chr13	30194536	30202420	+	exon	ENSMUSG00000038732		-	428.923	-		-	-	587.917		-	-	477.102	ciri_circ_4205,find_circ_4184
circ_4214	chr8	72883208	72885803	-	exon	ENSMUSG00000004383		-	1072.31	-		740.749	-	-		-	527.195	-	ciri_circ_5201,find_circ_4214
circ_4217	chr19	37044522	37054374	-	exon	ENSMUSG00000039652		-	857.846	-		-	-	-		561.851	790.793	-	ciri_circ_4619,find_circ_4217
circ_4239	chr2	11760481	11763021	-	exon	ENSMUSG00000058594		-	643.385	-		-	-	-		561.851	-	477.102	ciri_circ_4647,find_circ_4239
circ_4240	chr15	85882674	85885192	+	exon	ENSMUSG00000022386		-	428.923	-		370.374	402.254	-		-	-	-	ciri_circ_1228,find_circ_4240
circ_4244	chr5	20789629	20794481	-	exon	ENSMUSG00000039987		-	428.923	-		740.749	402.254	-		-	-	-	ciri_circ_4922,find_circ_4244
circ_4275	chr15	100131902	100142147	+	exon	ENSMUSG00000023026		-	428.923	-		370.374	-	-		-	527.195	-	ciri_circ_6852,find_circ_4275
circ_4278	chr18	79027924	79087180	-	intron	ENSMUSG00000024548		-	428.923	454.199		-	-	-		561.851	-	-	ciri_circ_4578,find_circ_4278
circ_4294	chr16	65827891	65839733	+	exon	ENSMUSG00000091243		-	428.923	-		-	1005.64	-		-	-	477.102	ciri_circ_4418,find_circ_4294
circ_4297	chr2	131273911	131274263	+	exon	ENSMUSG00000037514		-	643.385	-		-	-	-		842.777	1581.59	-	ciri_circ_4740,find_circ_4297
circ_4302	chr17	5040580	5053617	+	intron	ENSMUSG00000069729		-	1072.31	-		-	-	-		561.851	-	954.203	ciri_circ_4428,find_circ_4302
circ_4305	chr14	67812142	67814373	-	exon	ENSMUSG00000044447		-	428.923	454.199		555.562	-	-		-	-	-	ciri_circ_1050,find_circ_4305
circ_4327	chr7	48963798	48964440	+	exon	ENSMUSG00000052512		-	643.385	1135.5		740.749	-	-		-	-	-	ciri_circ_6261,find_circ_4327
circ_4337	chr7	89955531	89962361	-	exon	ENSMUSG00000030619		-	857.846	-		-	-	783.89		561.851	-	-	ciri_circ_3276,find_circ_4337
circ_4338	chr17	12270863	12278111	-	exon	ENSMUSG00000014426		-	643.385	454.199		-	-	391.945		-	-	-	ciri_circ_4436,find_circ_4338
circ_4346	chr1	66762048	66807604	-	exon	ENSMUSG00000026004		-	428.923	-		-	-	-		561.851	-	477.102	ciri_circ_3930,find_circ_4346
circ_4349	chr2	125767375	125775731	-	exon	ENSMUSG00000035093		-	643.385	681.298		-	-	391.945		-	-	-	ciri_circ_4731,find_circ_4349
circ_4350	chr7	132949585	132973623	+	exon	ENSMUSG00000030967		-	643.385	681.298		740.749	-	-		-	-	-	ciri_circ_5171,find_circ_4350
circ_4357	chr1	13221307	13286025	-	exon	ENSMUSG00000005886		-	428.923	-		-	-	979.862		-	527.195	-	ciri_circ_16,find_circ_4357
circ_4371	chr4	28870557	28871996	+	exon	ENSMUSG00000028289		-	428.923	-		370.374	1206.76	-		-	-	-	ciri_circ_4855,find_circ_4371
circ_4376	chr11	68011315	68020998	+	exon	ENSMUSG00000020903		-	428.923	454.199		-	-	-		561.851	-	-	ciri_circ_4067,find_circ_4376
circ_4380	chr13	106982524	106988075	-	exon	ENSMUSG00000021693		-	-	681.298		555.562	-	-		-	527.195	-	ciri_circ_940,find_circ_4380
circ_4392	chrX	9905518	9932867	+	exon	ENSMUSG00000054453		-	-	908.397		-	-	587.917		-	-	477.102	ciri_circ_6413,find_circ_4392
circ_4412	chr1	43067474	43075952	-	exon	ENSMUSG00000070939		-	-	681.298		-	-	-		-	527.195	477.102	ciri_circ_5399,find_circ_4412
circ_4427	chr2	93012627	93013889	-	exon	ENSMUSG00000075028		-	-	454.199		-	-	-		561.851	-	954.203	ciri_circ_5951,find_circ_4427
circ_4442	chr9	59396351	59405855	-	exon	ENSMUSG00000025234		-	-	454.199		-	-	-		561.851	527.195	-	ciri_circ_6374,find_circ_4442
circ_4483	chr1	55204183	55206615	-	exon	ENSMUSG00000025978		-	-	454.199		370.374	-	391.945		-	-	-	ciri_circ_5402,find_circ_4483
circ_4495	chr11	88169565	88183431	+	exon	ENSMUSG00000018378		-	-	454.199		555.562	-	391.945		-	-	-	ciri_circ_6632,find_circ_4495
circ_4529	chr15	73012806	73031643	-	exon	ENSMUSG00000047921		-	-	454.199		370.374	-	-		-	-	715.652	ciri_circ_5745,find_circ_4529
circ_4537	MT	1274	1562	-	exon	ENSMUSG00000064339		-	-	454.199		370.374	-	-		561.851	-	-	ciri_circ_3909,find_circ_4537
circ_4543	chr4	120463075	120483833	+	exon	ENSMUSG00000000085		-	-	454.199		-	402.254	-		-	-	477.102	ciri_circ_6093,find_circ_4543
circ_4555	chr10	108230437	108243130	+	exon	ENSMUSG00000019907		-	-	454.199		555.562	402.254	-		-	-	-	ciri_circ_5493,find_circ_4555
circ_4561	chr10	81081901	81082134	+	exon	ENSMUSG00000004929		-	-	681.298		-	-	391.945		-	527.195	-	ciri_circ_5485,find_circ_4561
circ_4572	chr14	118117737	118121861	-	exon	ENSMUSG00000022130		-	-	454.199		-	-	391.945		561.851	-	-	ciri_circ_5717,find_circ_4572
circ_4576	chrX	93800114	93814068	-	exon	ENSMUSG00000035232		-	-	454.199		-	-	587.917		-	527.195	-	ciri_circ_6431,find_circ_4576
circ_4580	chr10	45618498	45652738	+	exon	ENSMUSG00000038822		-	-	454.199		-	-	391.945		561.851	-	-	ciri_circ_5464,find_circ_4580
circ_4584	chr1	82236636	82237604	-	exon	ENSMUSG00000055980		-	-	454.199		-	402.254	-		561.851	-	-	ciri_circ_7643,find_circ_4584
circ_4587	chr14	25406150	25406932	-	intron	ENSMUSG00000087535		-	-	454.199		-	402.254	391.945		-	-	-	ciri_circ_4275,find_circ_4587
circ_4620	chr2	77108363	77173607	-	intergenic region	n/a		-	-	908.397		-	402.254	587.917		-	-	-	ciri_circ_4701,find_circ_4620
circ_4632	chr3	56085242	56091120	-	exon	ENSMUSG00000027799		-	-	454.199		-	1005.64	-		561.851	-	-	ciri_circ_4792,find_circ_4632
circ_4634	chr9	99480570	99537759	-	exon	ENSMUSG00000032468		-	-	454.199		555.562	-	391.945		-	-	-	ciri_circ_3750,find_circ_4634
circ_4638	chr15	33233664	33250133	+	intron	ENSMUSG00000039007		-	-	1135.5		-	1206.76	-		1123.7	-	-	ciri_circ_1134,find_circ_4638
circ_4642	chr8	121554105	121555359	-	exon	ENSMUSG00000052934		-	-	454.199		370.374	603.381	-		-	-	-	ciri_circ_6349,find_circ_4642
circ_4648	chr10	25239626	25289730	-	exon	ENSMUSG00000039166		-	-	454.199		555.562	-	587.917		-	-	-	ciri_circ_8526,find_circ_4648
circ_4659	chr14	14826936	14836227	+	exon	ENSMUSG00000042567		-	-	454.199		-	-	-		561.851	-	477.102	ciri_circ_5669,find_circ_4659
circ_4665	chr6	12468789	12471197	-	exon	ENSMUSG00000032625		-	-	1135.5		555.562	-	979.862		-	-	-	ciri_circ_6190,find_circ_4665
circ_4669	chr9	75116186	75123055	+	exon	ENSMUSG00000034593		-	-	454.199		-	603.381	-		-	-	477.102	ciri_circ_6387,find_circ_4669
circ_4678	chr19	57629085	57638580	+	exon	ENSMUSG00000054843		-	-	454.199		-	-	-		561.851	-	477.102	ciri_circ_1938,find_circ_4678
circ_4680	chr6	65881049	65886178	+	exon	ENSMUSG00000029913		-	-	454.199		-	-	391.945		-	790.793	-	ciri_circ_6214,find_circ_4680
circ_4681	chr15	89293739	89294071	-	exon	ENSMUSG00000036529		-	-	908.397		-	-	587.917		-	-	477.102	ciri_circ_5757,find_circ_4681
circ_4688	chr19	14464309	14468271	-	exon	ENSMUSG00000024642		-	-	454.199		-	402.254	391.945		-	-	-	ciri_circ_1843,find_circ_4688
circ_4702	chr12	111772319	111774583	+	exon	ENSMUSG00000021288		-	-	908.397		370.374	-	-		-	527.195	-	ciri_circ_5617,find_circ_4702
circ_4703	chr17	5886997	5920673	+	exon	ENSMUSG00000002365		-	-	454.199		-	402.254	391.945		-	-	-	ciri_circ_5781,find_circ_4703
circ_4712	chr7	114046647	114060419	-	intergenic region	n/a		-	-	454.199		-	402.254	783.89		-	-	-	ciri_circ_3329,find_circ_4712
circ_4713	chr8	11785713	11791544	+	exon	ENSMUSG00000031511		-	-	681.298		370.374	402.254	-		-	-	-	ciri_circ_5180,find_circ_4713
circ_4728	chr10	95989562	95995690	+	exon	ENSMUSG00000036499		-	-	681.298		1111.12	-	-		-	790.793	-	ciri_circ_353,find_circ_4728
circ_4734	chr5	74397654	74402939	-	intron	ENSMUSG00000062110		-	-	681.298		1296.31	-	-		-	-	715.652	ciri_circ_6138,find_circ_4734
circ_4737	chrX	101667278	101668159	+	exon	ENSMUSG00000034160		-	-	454.199		-	603.381	-		-	-	477.102	ciri_circ_6434,find_circ_4737
circ_4738	chr14	106394466	106397826	+	intergenic region	n/a		-	-	454.199		370.374	-	-		1123.7	-	-	ciri_circ_5715,find_circ_4738
circ_4744	chr11	63148984	63151259	+	intron	ENSMUSG00000018217		-	-	908.397		370.374	-	-		561.851	-	-	ciri_circ_5536,find_circ_4744
circ_4768	chr15	79542487	79543856	-	exon	ENSMUSG00000055065		-	-	681.298		-	-	-		-	790.793	954.203	ciri_circ_4365,find_circ_4768
circ_4779	chr17	63471408	63487969	-	exon	ENSMUSG00000023965		-	-	454.199		-	-	-		1685.55	-	715.652	ciri_circ_5815,find_circ_4779
circ_4786	chr17	24088004	24100908	-	exon	ENSMUSG00000024122		-	-	454.199		925.936	402.254	-		-	-	-	ciri_circ_1463,find_circ_4786
circ_4795	chr12	81314260	81316104	-	exon	ENSMUSG00000079055		-	-	681.298		370.374	-	587.917		-	-	-	ciri_circ_5601,find_circ_4795
circ_4798	chr2	14981306	14984439	+	exon	ENSMUSG00000057914		-	-	454.199		-	402.254	-		-	790.793	-	ciri_circ_5901,find_circ_4798
circ_4814	chr17	10213359	10217803	-	exon	ENSMUSG00000062078		-	-	681.298		370.374	402.254	-		-	-	-	ciri_circ_1362,find_circ_4814
circ_4816	chr6	137778124	137796882	+	exon	ENSMUSG00000030225		-	-	454.199		-	-	-		-	790.793	477.102	ciri_circ_5093,find_circ_4816
circ_4843	chr11	93905159	93933958	+	exon	ENSMUSG00000059474		-	-	454.199		740.749	-	-		561.851	-	-	ciri_circ_5557,find_circ_4843
circ_4853	chr14	16270475	16294673	+	exon	ENSMUSG00000021785		-	-	908.397		740.749	-	783.89		-	-	-	ciri_circ_5672,find_circ_4853
circ_4854	chr1	173724934	173747620	-	intergenic region	n/a		-	-	2498.09		2037.06	-	979.862		-	-	-	ciri_circ_158,find_circ_4854
circ_4858	chr5	27772004	27775679	-	exon	ENSMUSG00000002221		-	-	908.397		-	-	-		-	527.195	477.102	ciri_circ_6120,find_circ_4858
circ_4861	chr15	10592072	10610093	-	exon	ENSMUSG00000022246		-	-	454.199		370.374	804.508	-		-	-	-	ciri_circ_5723,find_circ_4861
circ_4877	chr2	113582098	113603289	+	exon	ENSMUSG00000044042		-	-	454.199		-	-	-		561.851	-	477.102	ciri_circ_2139,find_circ_4877
circ_4882	chr13	58177851	58199070	-	exon	ENSMUSG00000005312		-	-	1135.5		555.562	-	783.89		-	-	-	ciri_circ_5635,find_circ_4882
circ_4927	chr18	63794225	63825238	+	exon	ENSMUSG00000040560		-	-	454.199		-	-	391.945		-	527.195	-	ciri_circ_5860,find_circ_4927
circ_4938	chr2	18109782	18146872	+	exon	ENSMUSG00000026743		-	-	681.298		925.936	402.254	-		-	-	-	ciri_circ_4651,find_circ_4938
circ_4939	chr17	84443818	84444509	-	exon	ENSMUSG00000024251		-	-	454.199		-	402.254	391.945		-	-	-	ciri_circ_5830,find_circ_4939
circ_4942	chr6	30095340	30102309	+	exon	ENSMUSG00000058440		-	-	454.199		-	-	-		1685.55	527.195	-	ciri_circ_6195,find_circ_4942
circ_4958	chr6	38440455	38464043	+	exon	ENSMUSG00000038538		-	-	454.199		370.374	-	-		561.851	-	-	ciri_circ_6202,find_circ_4958
circ_4962	chr2	75851494	75877598	+	exon	ENSMUSG00000042410		-	-	454.199		-	-	391.945		-	1054.39	-	ciri_circ_5940,find_circ_4962
circ_4967	chr4	55050186	55073105	+	exon	ENSMUSG00000060206		-	-	454.199		370.374	1206.76	-		-	-	-	ciri_circ_6065,find_circ_4967
circ_4974	chr1	170787346	170799745	-	exon	ENSMUSG00000026663		-	-	681.298		-	-	391.945		-	527.195	-	ciri_circ_5435,find_circ_4974
circ_4993	chr8	86631386	86652317	+	exon	ENSMUSG00000047866		-	-	454.199		-	-	587.917		-	790.793	-	ciri_circ_5222,find_circ_4993
circ_5011	chr3	135626595	135669339	-	exon	ENSMUSG00000028163		-	-	681.298		370.374	-	-		-	527.195	-	ciri_circ_2446,find_circ_5011
circ_5016	chr1	17619783	17621762	+	exon	ENSMUSG00000067780		-	-	454.199		-	-	-		561.851	527.195	-	ciri_circ_3915,find_circ_5016
circ_5025	chr10	50748806	50770383	+	intron	ENSMUSG00000038774		-	-	454.199		555.562	-	-		-	527.195	-	ciri_circ_5470,find_circ_5025
circ_5029	chr14	62346568	62353637	+	exon	ENSMUSG00000021932		-	-	908.397		-	-	979.862		-	527.195	-	ciri_circ_1041,find_circ_5029
circ_5035	chr8	41312158	41313981	+	exon	ENSMUSG00000031592		-	-	454.199		-	402.254	391.945		-	-	-	ciri_circ_8380,find_circ_5035
circ_5039	chr8	77344640	77384796	-	exon	ENSMUSG00000037148		-	-	1135.5		-	-	587.917		-	-	1431.3	ciri_circ_3489,find_circ_5039
circ_5044	chr9	7952953	7962402	-	exon	ENSMUSG00000053110		-	-	454.199		-	402.254	391.945		-	-	-	ciri_circ_6355,find_circ_5044
circ_5050	chr7	116346119	116350929	-	exon	ENSMUSG00000030660		-	-	1135.5		740.749	-	391.945		-	-	-	ciri_circ_6291,find_circ_5050
circ_5068	chr3	41053687	41070435	-	intergenic region	n/a		-	-	454.199		-	-	391.945		842.777	-	-	ciri_circ_6002,find_circ_5068
circ_5071	chr18	73657195	73678039	-	exon	ENSMUSG00000024515		-	-	681.298		370.374	402.254	-		-	-	-	ciri_circ_1782,find_circ_5071
circ_5075	chr12	84124475	84136637	+	exon	ENSMUSG00000042523		-	-	454.199		-	603.381	-		-	-	477.102	ciri_circ_4173,find_circ_5075
circ_5084	chr9	32151922	32153124	+	exon	ENSMUSG00000041444		-	-	454.199		-	-	587.917		-	527.195	-	ciri_circ_5265,find_circ_5084
circ_5106	chr3	81141405	81174996	+	exon	ENSMUSG00000028019		-	-	454.199		-	-	391.945		-	-	477.102	ciri_circ_6011,find_circ_5106
circ_5116	chr17	63957125	64037664	+	exon	ENSMUSG00000000127		-	-	681.298		1481.5	-	-		-	1054.39	-	ciri_circ_1601,find_circ_5116
circ_5133	chr14	70256360	70267506	-	exon	ENSMUSG00000022092		-	-	454.199		-	603.381	-		-	-	954.203	ciri_circ_1052,find_circ_5133
circ_5141	chrX	151376748	151381993	+	exon	ENSMUSG00000025262		-	-	454.199		-	402.254	391.945		-	-	-	ciri_circ_3882,find_circ_5141
circ_5155	chr11	85077265	85083894	-	exon	ENSMUSG00000000804		-	-	454.199		555.562	-	-		-	-	477.102	ciri_circ_4084,find_circ_5155
circ_5167	chr4	58872589	58885498	-	exon	ENSMUSG00000050812		-	-	454.199		370.374	-	-		1123.7	-	-	ciri_circ_6072,find_circ_5167
circ_5174	chr10	79930635	79932078	+	exon	ENSMUSG00000019564		-	-	908.397		-	603.381	-		-	-	477.102	ciri_circ_5483,find_circ_5174
circ_5182	chr13	5974341	6026141	+	intergenic region	n/a		-	-	454.199		555.562	-	587.917		-	-	-	ciri_circ_4198,find_circ_5182
circ_5196	chr1	139040000	139062971	+	exon	ENSMUSG00000056268		-	-	681.298		-	603.381	-		-	-	477.102	ciri_circ_107,find_circ_5196
circ_5225	chr2	33260478	33324703	-	exon	ENSMUSG00000038831		-	-	454.199		-	603.381	-		-	527.195	-	ciri_circ_4675,find_circ_5225
circ_5232	chr12	80364004	80376731	-	exon	ENSMUSG00000049106		-	-	454.199		370.374	402.254	-		-	-	-	ciri_circ_750,find_circ_5232
circ_5243	chr4	9630773	9639347	-	exon	ENSMUSG00000028207		-	-	454.199		-	-	-		-	527.195	477.102	ciri_circ_6051,find_circ_5243
circ_5247	chr12	77448473	77450276	+	exon	ENSMUSG00000021065		-	-	681.298		370.374	603.381	-		-	-	-	ciri_circ_5598,find_circ_5247
circ_5253	chr3	100652539	100656274	-	exon	ENSMUSG00000008763		-	-	681.298		370.374	-	587.917		-	-	-	ciri_circ_6024,find_circ_5253
circ_5260	chr18	35317842	35325475	-	exon	ENSMUSG00000024357		-	-	454.199		-	603.381	391.945		-	-	-	ciri_circ_5850,find_circ_5260
circ_5289	chr5	3722546	3734184	-	exon	ENSMUSG00000040351		-	-	454.199		555.562	-	391.945		-	-	-	ciri_circ_7256,find_circ_5289
circ_5315	chr6	120381535	120385713	+	exon	ENSMUSG00000030180		-	-	681.298		-	-	391.945		-	-	477.102	ciri_circ_6235,find_circ_5315
circ_5321	chr12	51647994	51668475	-	intron	ENSMUSG00000020954		-	-	681.298		-	402.254	-		-	-	477.102	ciri_circ_5587,find_circ_5321
circ_5338	chr9	72230266	72233329	-	intergenic region	n/a		-	-	681.298		-	-	-		2247.41	2372.38	-	ciri_circ_3709,find_circ_5338
circ_5350	chr10	40434304	40436212	+	exon	ENSMUSG00000038481		-	-	908.397		-	-	-		561.851	527.195	-	ciri_circ_5461,find_circ_5350
circ_5353	chr8	122973076	122974792	-	intron	ENSMUSG00000092329;ENSMUSG00000035569		-	-	681.298		-	603.381	-		-	-	477.102	ciri_circ_6350,find_circ_5353
circ_5371	chr10	4028395	4056861	+	exon	ENSMUSG00000040675		-	-	454.199		370.374	603.381	-		-	-	-	ciri_circ_7679,find_circ_5371
circ_5385	chr8	22861517	22862801	+	exon	ENSMUSG00000031540		-	-	454.199		-	-	391.945		-	527.195	-	ciri_circ_3413,find_circ_5385
circ_5393	chrX	139954907	139995228	-	exon	ENSMUSG00000031433		-	-	454.199		1111.12	-	-		-	-	715.652	ciri_circ_5374,find_circ_5393
circ_5405	chr17	17529701	17575387	-	exon	ENSMUSG00000023845		-	-	454.199		-	-	587.917		561.851	-	-	ciri_circ_8738,find_circ_5405
circ_5410	chr14	121255408	121257966	+	exon	ENSMUSG00000025555		-	-	681.298		-	-	-		-	527.195	477.102	ciri_circ_5720,find_circ_5410
circ_5421	chr17	17377719	17390064	+	exon	ENSMUSG00000023852		-	-	454.199		370.374	-	-		-	-	477.102	ciri_circ_4457,find_circ_5421
circ_5427	chr1	39555478	39565332	-	exon	ENSMUSG00000048234		-	-	454.199		1666.69	-	-		842.777	-	-	ciri_circ_6458,find_circ_5427
circ_5438	chrX	164330015	164373919	+	intergenic region	n/a		-	-	681.298		555.562	-	391.945		-	-	-	ciri_circ_6447,find_circ_5438
circ_5440	chr12	78819204	78824872	+	exon	ENSMUSG00000021112		-	-	454.199		-	402.254	-		-	-	477.102	ciri_circ_5599,find_circ_5440
circ_5444	chr12	55782782	55795776	-	exon	ENSMUSG00000021027		-	-	454.199		-	402.254	391.945		-	-	-	ciri_circ_5591,find_circ_5444
circ_5451	chr17	65696271	65722087	-	exon	ENSMUSG00000056515		-	-	681.298		-	402.254	391.945		-	-	-	ciri_circ_1619,find_circ_5451
circ_5453	chr10	12421597	12455564	-	exon	ENSMUSG00000019820		-	-	454.199		370.374	402.254	-		-	-	-	ciri_circ_5451,find_circ_5453
circ_5459	chr14	87505759	87511770	+	exon	ENSMUSG00000022019		-	-	454.199		555.562	-	-		-	-	477.102	ciri_circ_5710,find_circ_5459
circ_5463	chr6	52609145	52630349	-	intron	ENSMUSG00000029776		-	-	454.199		370.374	-	391.945		-	-	-	ciri_circ_6211,find_circ_5463
circ_5464	chr4	103139358	103159821	+	exon	ENSMUSG00000028522		-	-	454.199		370.374	-	-		-	-	715.652	ciri_circ_7231,find_circ_5464
circ_5473	chr4	130668925	130728164	+	exon	ENSMUSG00000028580		-	-	454.199		-	402.254	-		1404.63	-	-	ciri_circ_6097,find_circ_5473
circ_5485	chr3	69016093	69019325	+	exon	ENSMUSG00000034349		-	-	454.199		-	804.508	979.862		-	-	-	ciri_circ_6008,find_circ_5485
circ_5488	chr3	65948262	65951554	-	exon	ENSMUSG00000027829		-	-	454.199		370.374	-	-		561.851	-	-	ciri_circ_7152,find_circ_5488
circ_5493	chr15	64312349	64313247	-	intron	ENSMUSG00000022377		-	-	454.199		370.374	-	587.917		-	-	-	ciri_circ_8702,find_circ_5493
circ_5504	chr4	130727998	130730548	+	exon	ENSMUSG00000028580		-	-	-		555.562	-	-		-	527.195	477.102	ciri_circ_7242,find_circ_5504
circ_5522	chr8	77310731	77351672	-	exon	ENSMUSG00000037148		-	-	-		370.374	-	783.89		-	527.195	-	ciri_circ_3482,find_circ_5522
circ_5544	chr11	70884765	70893688	+	exon	ENSMUSG00000020817		-	-	-		555.562	402.254	783.89		-	-	-	ciri_circ_6619,find_circ_5544
circ_5548	chr2	144255340	144255604	-	exon	ENSMUSG00000027423		-	-	-		370.374	402.254	-		-	527.195	-	ciri_circ_9471,find_circ_5548
circ_5559	chr17	26142618	26143576	+	exon	ENSMUSG00000024182		-	-	-		370.374	603.381	-		-	-	477.102	ciri_circ_6906,find_circ_5559
circ_5564	chr8	31235595	31261077	+	exon	ENSMUSG00000046152		-	-	-		370.374	-	-		561.851	527.195	-	ciri_circ_7472,find_circ_5564
circ_5567	chr10	69248771	69249728	+	exon	ENSMUSG00000019944		-	-	-		555.562	-	391.945		-	1054.39	-	ciri_circ_6548,find_circ_5567
circ_5573	chr19	60764032	60764233	-	exon	ENSMUSG00000024991		-	-	-		555.562	-	391.945		-	-	1908.41	ciri_circ_7014,find_circ_5573
circ_5578	chr19	60563162	60564294	-	exon	ENSMUSG00000033417		-	-	-		370.374	402.254	391.945		-	-	-	ciri_circ_7013,find_circ_5578
circ_5584	chr11	53537154	53537915	+	exon	ENSMUSG00000018398		-	-	-		370.374	603.381	391.945		-	-	-	ciri_circ_6603,find_circ_5584
circ_5596	chr6	146350023	146359487	-	exon	ENSMUSG00000030287		-	-	-		555.562	402.254	-		-	-	477.102	ciri_circ_7414,find_circ_5596
circ_5598	chr5	48256757	48283518	+	exon	ENSMUSG00000031558		-	-	-		370.374	-	-		1404.63	1581.59	-	ciri_circ_7279,find_circ_5598
circ_5600	chr3	142839208	142853714	-	exon	ENSMUSG00000004591		-	-	-		925.936	-	391.945		-	527.195	-	ciri_circ_7190,find_circ_5600
circ_5605	chr8	25727630	25753173	-	exon	ENSMUSG00000061313		-	-	-		555.562	-	979.862		561.851	-	-	ciri_circ_6308,find_circ_5605
circ_5611	chr9	7952953	7973911	-	exon	ENSMUSG00000053110		-	-	-		740.749	1005.64	-		-	527.195	-	ciri_circ_7513,find_circ_5611
circ_5613	chr5	34342522	34350838	+	exon	ENSMUSG00000029110		-	-	-		925.936	1005.64	-		-	527.195	-	ciri_circ_2725,find_circ_5613
circ_5621	chr2	120773229	120790355	-	exon	ENSMUSG00000027284		-	-	-		370.374	-	-		-	790.793	477.102	ciri_circ_7105,find_circ_5621
circ_5622	chr8	77277148	77310881	-	exon	ENSMUSG00000037148		-	-	-		740.749	-	391.945		-	1054.39	-	ciri_circ_3480,find_circ_5622
circ_5626	chr17	46669905	46672847	-	exon	ENSMUSG00000023971		-	-	-		370.374	-	391.945		-	790.793	-	ciri_circ_6922,find_circ_5626
circ_5632	chr2	91805024	91825352	+	exon	ENSMUSG00000040506		-	-	-		555.562	402.254	391.945		-	-	-	ciri_circ_2111,find_circ_5632
circ_5637	chr3	88965812	88966328	+	exon	ENSMUSG00000028053		-	-	-		1111.12	-	391.945		561.851	-	-	ciri_circ_4804,find_circ_5637
circ_5639	chr8	127370248	127426753	+	exon	ENSMUSG00000025812		-	-	-		370.374	402.254	-		-	527.195	-	ciri_circ_7510,find_circ_5639
circ_5646	chr10	76225288	76226315	-	exon	ENSMUSG00000020230		-	-	-		370.374	-	-		-	527.195	477.102	ciri_circ_11031,find_circ_5646
circ_5658	chr6	119796907	119825209	-	exon	ENSMUSG00000030172		-	-	-		370.374	-	391.945		842.777	-	-	ciri_circ_7391,find_circ_5658
circ_5670	chr6	28242977	28256526	-	exon	ENSMUSG00000039841		-	-	-		370.374	-	-		-	790.793	715.652	ciri_circ_7347,find_circ_5670
circ_5687	chr15	90980795	90995633	-	exon	ENSMUSG00000022629		-	-	-		555.562	603.381	-		-	527.195	-	ciri_circ_6846,find_circ_5687
circ_5722	chrX	56643368	56655053	+	exon	ENSMUSG00000060681		-	-	-		370.374	-	391.945		-	527.195	-	ciri_circ_5354,find_circ_5722
circ_5756	chr19	36956371	36973018	+	exon	ENSMUSG00000040565		-	-	-		370.374	402.254	-		561.851	-	-	ciri_circ_7007,find_circ_5756
circ_5779	chr17	32546630	32631365	+	intergenic region	n/a		-	-	-		1111.12	2614.65	1175.83		-	-	-	ciri_circ_1502,find_circ_5779
circ_5812	chr11	60270318	60275002	-	exon	ENSMUSG00000000538		-	-	-		1111.12	-	-		561.851	-	954.203	ciri_circ_490,find_circ_5812
circ_5820	chr7	130464131	130516168	-	exon	ENSMUSG00000030850		-	-	-		370.374	402.254	391.945		-	-	-	ciri_circ_3374,find_circ_5820
circ_5822	chr4	129838978	129846539	+	exon	ENSMUSG00000028788		-	-	-		1111.12	603.381	-		-	527.195	-	ciri_circ_2624,find_circ_5822
circ_5829	chr17	37054131	37054907	+	exon	ENSMUSG00000024462		-	-	-		370.374	-	-		-	527.195	477.102	ciri_circ_6916,find_circ_5829
circ_5854	chr1	170787346	170819432	-	exon	ENSMUSG00000026663		-	-	-		370.374	402.254	-		-	527.195	-	ciri_circ_6507,find_circ_5854
circ_5872	chr5	100475689	100480321	-	exon	ENSMUSG00000035310		-	-	-		555.562	-	-		561.851	-	954.203	ciri_circ_7298,find_circ_5872
circ_5874	chr7	114219526	114223347	-	exon	ENSMUSG00000030754		-	-	-		555.562	-	587.917		-	-	954.203	ciri_circ_7450,find_circ_5874
circ_5920	chr1	135602545	135607904	-	intergenic region	n/a		-	-	-		740.749	804.508	391.945		-	-	-	ciri_circ_6494,find_circ_5920
circ_5943	chr10	93264880	93265680	-	exon	ENSMUSG00000008398		-	-	-		370.374	804.508	-		-	527.195	-	ciri_circ_7718,find_circ_5943
circ_6002	chrX	12745746	12749337	-	exon	ENSMUSG00000064127		-	-	-		740.749	-	587.917		-	-	477.102	ciri_circ_5344,find_circ_6002
circ_6026	chr16	4137366	4180133	-	exon	ENSMUSG00000022521		-	-	-		370.374	603.381	-		-	790.793	-	ciri_circ_6856,find_circ_6026
circ_6060	chr4	74306965	74315649	+	exon	ENSMUSG00000028397		-	-	-		555.562	402.254	-		561.851	-	-	ciri_circ_4868,find_circ_6060
circ_6067	chr17	5040580	5097732	+	exon	ENSMUSG00000069729		-	-	-		370.374	-	391.945		561.851	-	-	ciri_circ_4429,find_circ_6067
circ_6078	chr9	13697174	13702355	+	exon	ENSMUSG00000031925		-	-	-		370.374	-	-		561.851	-	477.102	ciri_circ_5255,find_circ_6078
circ_6090	chr2	165812349	165820688	-	exon	ENSMUSG00000039671		-	-	-		555.562	603.381	-		-	-	477.102	ciri_circ_7127,find_circ_6090
circ_6100	chr1	82340319	82377704	+	exon	ENSMUSG00000026142		-	-	-		555.562	402.254	-		-	-	477.102	ciri_circ_6478,find_circ_6100
circ_6115	chr17	35397067	35425846	+	intergenic region	n/a		-	-	-		555.562	-	-		-	790.793	715.652	ciri_circ_1550,find_circ_6115
circ_6117	chr15	27871161	27905331	-	exon	ENSMUSG00000022263		-	-	-		555.562	603.381	-		561.851	-	-	ciri_circ_7903,find_circ_6117
circ_6120	chr12	4937387	4945022	+	exon	ENSMUSG00000052812		-	-	-		555.562	-	-		-	527.195	477.102	ciri_circ_6654,find_circ_6120
circ_6124	chr8	122401591	122403419	+	exon	ENSMUSG00000017478		-	-	-		555.562	402.254	587.917		-	-	-	ciri_circ_3588,find_circ_6124
circ_6144	chr8	122908668	122974792	-	exon	ENSMUSG00000035569		-	-	-		370.374	-	979.862		-	527.195	-	ciri_circ_3590,find_circ_6144
circ_6145	chr11	117714126	117723550	+	exon	ENSMUSG00000025571		-	-	-		555.562	603.381	587.917		-	-	-	ciri_circ_6645,find_circ_6145
circ_6149	chr2	77074836	77170607	-	exon	ENSMUSG00000044033		-	-	-		370.374	804.508	-		-	527.195	-	ciri_circ_8085,find_circ_6149
circ_6170	chr2	3178236	3202721	+	exon	ENSMUSG00000050530		-	-	-		370.374	402.254	-		561.851	-	-	ciri_circ_7015,find_circ_6170
circ_6173	chr13	9710146	9735466	-	exon	ENSMUSG00000021156		-	-	-		555.562	-	-		-	527.195	477.102	ciri_circ_6697,find_circ_6173
circ_6178	chr10	4041773	4056861	+	exon	ENSMUSG00000040675		-	-	-		370.374	603.381	391.945		-	-	-	ciri_circ_208,find_circ_6178
circ_6186	chr12	28859252	28867153	+	exon	ENSMUSG00000036613		-	-	-		370.374	402.254	-		-	527.195	-	ciri_circ_7793,find_circ_6186
circ_6190	chr9	64204431	64214609	-	exon	ENSMUSG00000004936		-	-	-		740.749	-	-		-	527.195	477.102	ciri_circ_3681,find_circ_6190
circ_6202	chr8	106083811	106109129	+	exon	ENSMUSG00000031902		-	-	-		370.374	402.254	391.945		-	-	-	ciri_circ_8393,find_circ_6202
circ_6214	chr15	38045693	38048149	-	exon	ENSMUSG00000037487		-	-	-		370.374	-	783.89		-	527.195	-	ciri_circ_4348,find_circ_6214
circ_6223	chr13	35790101	35816575	+	exon	ENSMUSG00000059288		-	-	-		555.562	-	-		561.851	527.195	-	ciri_circ_841,find_circ_6223
circ_6226	chr9	44352597	44353354	-	exon	ENSMUSG00000032127		-	-	-		370.374	-	-		-	1054.39	477.102	ciri_circ_7534,find_circ_6226
circ_6231	chr3	89876809	89890473	-	exon	ENSMUSG00000027947		-	-	-		740.749	402.254	1175.83		-	-	-	ciri_circ_2380,find_circ_6231
circ_6240	chr12	100654047	100654489	-	intron	ENSMUSG00000021180		-	-	-		370.374	-	391.945		-	-	715.652	ciri_circ_778,find_circ_6240
circ_6263	chr8	25827174	25833846	-	exon	ENSMUSG00000031575		-	-	-		555.562	-	-		-	527.195	1192.75	ciri_circ_7471,find_circ_6263
circ_6264	chr19	36956371	36970038	+	exon	ENSMUSG00000040565		-	-	-		370.374	-	391.945		-	-	477.102	ciri_circ_11563,find_circ_6264
circ_6269	chr1	87364104	87374111	+	exon	ENSMUSG00000048000		-	-	-		740.749	-	391.945		-	-	954.203	ciri_circ_76,find_circ_6269
circ_6281	chr13	18810432	18814293	+	exon	ENSMUSG00000041236		-	-	-		370.374	-	-		561.851	527.195	-	ciri_circ_5623,find_circ_6281
circ_6321	chr2	54516442	54516681	+	exon	ENSMUSG00000060988		-	-	-		555.562	-	-		561.851	-	1192.75	ciri_circ_7061,find_circ_6321
circ_6334	chr19	40349899	40365166	-	exon	ENSMUSG00000025006		-	-	-		370.374	402.254	391.945		-	-	-	ciri_circ_8046,find_circ_6334
circ_6343	chr6	17819250	17855028	+	exon	ENSMUSG00000029534		-	-	-		555.562	1005.64	-		-	527.195	-	ciri_circ_2923,find_circ_6343
circ_6358	chr14	123827752	123846579	+	exon	ENSMUSG00000032925		-	-	-		370.374	-	783.89		842.777	-	-	ciri_circ_8683,find_circ_6358
circ_6390	chr10	92075170	92135809	-	exon	ENSMUSG00000112117		-	-	-		370.374	402.254	-		-	527.195	-	ciri_circ_341,find_circ_6390
circ_6436	chr13	55507330	55507624	-	exon	ENSMUSG00000021493		-	-	-		370.374	-	-		1123.7	527.195	-	ciri_circ_6711,find_circ_6436
circ_6441	chr11	72663071	72679492	+	exon	ENSMUSG00000020794		-	-	-		370.374	-	-		561.851	-	477.102	ciri_circ_6620,find_circ_6441
circ_6447	chr9	80087430	80111453	+	exon	ENSMUSG00000034252		-	-	-		370.374	-	391.945		-	-	715.652	ciri_circ_9126,find_circ_6447
circ_6468	chr8	34918379	34940920	-	exon	ENSMUSG00000031529		-	-	-		740.749	-	-		-	790.793	477.102	ciri_circ_7476,find_circ_6468
circ_6477	chr4	59886407	59894677	+	exon	ENSMUSG00000028385		-	-	-		370.374	-	-		561.851	-	715.652	ciri_circ_7216,find_circ_6477
circ_6478	chrX	48558269	48567113	-	exon	ENSMUSG00000036916		-	-	-		370.374	603.381	-		-	-	477.102	ciri_circ_8454,find_circ_6478
circ_6489	chr17	64624528	64714712	+	exon	ENSMUSG00000024085		-	-	-		370.374	804.508	-		842.777	-	-	ciri_circ_4502,find_circ_6489
circ_6493	chr9	59779543	59790092	+	exon	ENSMUSG00000039585		-	-	-		370.374	-	-		-	527.195	477.102	ciri_circ_7546,find_circ_6493
circ_6499	chr4	59592155	59612810	+	exon	ENSMUSG00000028383		-	-	-		370.374	-	-		-	527.195	477.102	ciri_circ_7215,find_circ_6499
circ_6508	chr5	5195278	5249228	-	exon	ENSMUSG00000028926		-	-	-		370.374	402.254	391.945		-	-	-	ciri_circ_2678,find_circ_6508
circ_6515	chr15	8042711	8082582	-	exon	ENSMUSG00000039828		-	-	-		370.374	-	-		1123.7	-	477.102	ciri_circ_6815,find_circ_6515
circ_6517	chrX	162921199	162975279	+	exon	ENSMUSG00000031360		-	-	-		370.374	402.254	391.945		-	-	-	ciri_circ_7614,find_circ_6517
circ_6527	chr4	57638010	57648120	+	exon	ENSMUSG00000090053		-	-	-		370.374	-	-		561.851	-	477.102	ciri_circ_4862,find_circ_6527
circ_6543	chr4	58861525	58905107	-	exon	ENSMUSG00000050812		-	-	-		370.374	-	-		842.777	527.195	-	ciri_circ_6070,find_circ_6543
circ_6552	chr5	147450653	147503202	+	exon	ENSMUSG00000029647		-	-	-		740.749	-	391.945		-	527.195	-	ciri_circ_7337,find_circ_6552
circ_6555	chr2	77108363	77170607	-	exon	ENSMUSG00000044033		-	-	-		555.562	603.381	391.945		-	-	-	ciri_circ_8086,find_circ_6555
circ_6561	chr10	39742691	39799977	+	exon	ENSMUSG00000019841		-	-	-		370.374	-	-		561.851	-	477.102	ciri_circ_251,find_circ_6561
circ_6572	chr17	16971171	17064206	+	intron	ENSMUSG00000023852		-	-	-		370.374	804.508	391.945		-	-	-	ciri_circ_1431,find_circ_6572
circ_6600	chr18	82674307	82682287	-	exon	ENSMUSG00000041258		-	-	-		555.562	-	-		561.851	-	715.652	ciri_circ_6984,find_circ_6600
circ_6603	chr15	34999831	35008298	-	exon	ENSMUSG00000022329		-	-	-		370.374	-	-		-	527.195	477.102	ciri_circ_11110,find_circ_6603
circ_6671	chr2	69047145	69071438	+	exon	ENSMUSG00000027035		-	-	-		370.374	-	-		561.851	527.195	-	ciri_circ_2072,find_circ_6671
circ_6679	chr9	22643745	22670957	+	exon	ENSMUSG00000035919		-	-	-		1111.12	603.381	-		-	527.195	-	ciri_circ_7523,find_circ_6679
circ_6698	chr15	81117391	81117652	-	exon	ENSMUSG00000042292		-	-	-		370.374	1005.64	-		-	-	477.102	ciri_circ_7913,find_circ_6698
circ_6701	chr11	59437978	59438513	-	exon	ENSMUSG00000009894		-	-	-		370.374	402.254	-		561.851	-	-	ciri_circ_6606,find_circ_6701
circ_6705	chr4	41216566	41229848	-	exon	ENSMUSG00000028433		-	-	-		740.749	-	-		-	1054.39	477.102	ciri_circ_6058,find_circ_6705
circ_6719	chr4	74262809	74281011	+	exon	ENSMUSG00000028397		-	-	-		370.374	402.254	391.945		-	-	-	ciri_circ_7218,find_circ_6719
circ_6770	chr3	68596150	68621066	+	exon	ENSMUSG00000102422		-	-	-		-	402.254	391.945		561.851	-	-	ciri_circ_8144,find_circ_6770
circ_6771	chr1	56891163	56899117	-	exon	ENSMUSG00000038331		-	-	-		-	402.254	587.917		-	-	477.102	ciri_circ_7636,find_circ_6771
circ_6773	chr10	81308948	81309247	+	exon	ENSMUSG00000034902		-	-	-		-	402.254	-		561.851	1581.59	-	ciri_circ_7712,find_circ_6773
circ_6823	chr14	67016017	67023190	-	exon	ENSMUSG00000022052		-	-	-		-	402.254	-		-	527.195	477.102	ciri_circ_7876,find_circ_6823
circ_6871	chr13	55055975	55069807	-	exon	ENSMUSG00000025878		-	-	-		-	603.381	-		1123.7	-	715.652	ciri_circ_864,find_circ_6871
circ_6895	chr3	27426034	27440170	-	exon	ENSMUSG00000039286		-	-	-		-	603.381	391.945		-	527.195	-	ciri_circ_8878,find_circ_6895
circ_6922	chr2	13216770	13219127	-	exon	ENSMUSG00000026727		-	-	-		-	402.254	391.945		-	527.195	-	ciri_circ_5900,find_circ_6922
circ_6990	chr1	163933479	163934817	+	exon	ENSMUSG00000026584		-	-	-		-	402.254	783.89		-	-	477.102	ciri_circ_7671,find_circ_6990
circ_6992	chr9	110182922	110185936	+	exon	ENSMUSG00000032481		-	-	-		-	804.508	-		561.851	527.195	-	ciri_circ_8444,find_circ_6992
circ_7026	chr6	30088833	30102309	+	exon	ENSMUSG00000058440		-	-	-		-	402.254	391.945		-	-	477.102	ciri_circ_8280,find_circ_7026
circ_7047	chr18	34812372	34813561	+	exon	ENSMUSG00000038773		-	-	-		-	402.254	-		842.777	527.195	-	ciri_circ_10792,find_circ_7047
circ_7075	chr12	111219811	111222397	+	intron	ENSMUSG00000021277		-	-	-		-	402.254	-		561.851	790.793	-	ciri_circ_5616,find_circ_7075
circ_7080	chr9	35235231	35244706	-	exon	ENSMUSG00000050471		-	-	-		-	402.254	587.917		-	-	477.102	ciri_circ_9112,find_circ_7080
circ_7082	chr7	130464131	130467437	-	exon	ENSMUSG00000030850		-	-	-		-	402.254	-		-	790.793	477.102	ciri_circ_11308,find_circ_7082
circ_7096	chr5	124576798	124577152	-	exon	ENSMUSG00000029388		-	-	-		-	402.254	587.917		-	-	954.203	ciri_circ_8974,find_circ_7096
circ_7153	chr6	118713257	118780324	-	exon	ENSMUSG00000051331		-	-	-		-	402.254	391.945		-	527.195	-	ciri_circ_8317,find_circ_7153
circ_7177	chr18	64470682	64483457	-	exon	ENSMUSG00000024588		-	-	-		-	402.254	391.945		-	527.195	-	ciri_circ_1769,find_circ_7177
circ_7182	chr14	121101989	121102182	+	exon	ENSMUSG00000025555		-	-	-		-	402.254	-		2528.33	-	954.203	ciri_circ_7892,find_circ_7182
circ_7190	chr17	74777644	74799411	+	exon	ENSMUSG00000024078		-	-	-		-	402.254	587.917		1123.7	-	-	ciri_circ_8762,find_circ_7190
circ_7212	chr19	4787361	4788042	-	exon	ENSMUSG00000096370		-	-	-		-	402.254	587.917		-	-	477.102	ciri_circ_8791,find_circ_7212
circ_7235	chr1	161853715	161862302	-	exon	ENSMUSG00000040297		-	-	-		-	402.254	-		-	527.195	715.652	ciri_circ_7670,find_circ_7235
circ_7239	chr14	56902696	56903552	+	exon	ENSMUSG00000021945		-	-	-		-	402.254	-		-	790.793	715.652	ciri_circ_7870,find_circ_7239
circ_7251	chr9	6288490	6293937	+	exon	ENSMUSG00000032006		-	-	-		-	603.381	-		561.851	527.195	-	ciri_circ_8407,find_circ_7251
circ_7276	chr10	52284103	52290923	+	exon	ENSMUSG00000019891		-	-	-		-	402.254	587.917		-	527.195	-	ciri_circ_285,find_circ_7276
circ_7295	chr16	17764384	17789370	+	exon	ENSMUSG00000022750		-	-	-		-	402.254	391.945		-	-	477.102	ciri_circ_7930,find_circ_7295
circ_7322	chr3	57769040	57796295	+	exon	ENSMUSG00000036503		-	-	-		-	402.254	391.945		561.851	-	-	ciri_circ_2311,find_circ_7322
circ_7342	chrX	20186060	20188920	-	exon	ENSMUSG00000037341		-	-	-		-	1005.64	391.945		561.851	-	-	ciri_circ_7594,find_circ_7342
circ_7371	chr11	53368660	53380672	+	exon	ENSMUSG00000049470		-	-	-		-	1005.64	-		-	790.793	1192.75	ciri_circ_7747,find_circ_7371
circ_7410	chr5	3575623	3577344	+	exon	ENSMUSG00000008307		-	-	-		-	603.381	-		-	790.793	477.102	ciri_circ_8231,find_circ_7410
circ_7434	chr12	55407469	55414498	+	exon	ENSMUSG00000021024		-	-	-		-	804.508	391.945		561.851	-	-	ciri_circ_4156,find_circ_7434
circ_7469	chr8	3258383	3259388	-	intron	ENSMUSG00000005534		-	-	-		-	402.254	-		-	1054.39	477.102	ciri_circ_11310,find_circ_7469
circ_7470	chr2	77124122	77173607	-	intergenic region	n/a		-	-	-		-	1005.64	587.917		-	527.195	-	ciri_circ_8087,find_circ_7470
circ_7478	chr11	88049977	88053039	+	exon	ENSMUSG00000018379		-	-	-		-	402.254	-		561.851	-	477.102	ciri_circ_4093,find_circ_7478
circ_7528	chr5	73148017	73221072	-	exon	ENSMUSG00000070733		-	-	-		-	603.381	391.945		-	1054.39	-	ciri_circ_8246,find_circ_7528
circ_7532	chr10	59166504	59192815	-	exon	ENSMUSG00000019917		-	-	-		-	603.381	783.89		-	-	477.102	ciri_circ_7704,find_circ_7532
circ_7603	chr10	61527060	61548215	+	exon	ENSMUSG00000037151		-	-	-		-	804.508	-		561.851	-	1192.75	ciri_circ_7706,find_circ_7603
circ_7634	chr14	21774963	21783796	+	exon	ENSMUSG00000021770		-	-	-		-	402.254	391.945		561.851	-	-	ciri_circ_4273,find_circ_7634
circ_7672	chr6	116229223	116241622	+	exon	ENSMUSG00000024104		-	-	-		-	-	587.917		561.851	527.195	-	ciri_circ_9018,find_circ_7672
circ_7780	chr8	111840358	111841990	-	exon	ENSMUSG00000031954		-	-	-		-	-	783.89		561.851	527.195	-	ciri_circ_9103,find_circ_7780
circ_7786	chr17	67042095	67046158	-	exon	ENSMUSG00000033278		-	-	-		-	-	391.945		842.777	-	477.102	ciri_circ_10776,find_circ_7786
circ_7854	chr14	36896255	36909212	-	exon	ENSMUSG00000058690		-	-	-		-	-	391.945		561.851	-	715.652	ciri_circ_6763,find_circ_7854
circ_7899	chr5	135216590	135218294	+	exon	ENSMUSG00000002748		-	-	-		-	-	783.89		842.777	1054.39	-	ciri_circ_8982,find_circ_7899
circ_7952	chrX	38440131	38442140	-	exon	ENSMUSG00000016534		-	-	-		-	-	783.89		1123.7	790.793	-	ciri_circ_9145,find_circ_7952
circ_7991	chr16	14419700	14423260	+	exon	ENSMUSG00000023088		-	-	-		-	-	391.945		561.851	-	477.102	ciri_circ_1275,find_circ_7991
circ_8028	chr3	89023031	89035481	+	exon	ENSMUSG00000028053		-	-	-		-	-	979.862		-	527.195	715.652	ciri_circ_8892,find_circ_8028
circ_8069	chr1	138532737	138544343	-	exon	ENSMUSG00000026393		-	-	-		-	-	391.945		561.851	-	477.102	ciri_circ_8510,find_circ_8069
circ_8195	chr14	64748446	64757584	+	exon	ENSMUSG00000060012		-	-	-		-	-	979.862		1123.7	527.195	-	ciri_circ_8667,find_circ_8195
circ_8204	chr6	124519721	124577085	+	intergenic region	n/a		-	-	-		-	-	6467.09		8989.62	7907.93	-	ciri_circ_3138,find_circ_8204
circ_8236	chr1	87880368	87881939	+	exon	ENSMUSG00000070738		-	-	-		-	-	391.945		1123.7	-	715.652	ciri_circ_8504,find_circ_8236
circ_8256	chr5	33843112	33868878	+	exon	ENSMUSG00000057406		-	-	-		-	-	391.945		-	527.195	477.102	ciri_circ_8953,find_circ_8256
circ_8311	chr15	12889619	12905701	+	exon	ENSMUSG00000022191		-	-	-		-	-	979.862		-	1317.99	715.652	ciri_circ_6817,find_circ_8311
circ_8633	chr19	16710271	16725693	-	exon	ENSMUSG00000046230		-	-	-		-	-	-		842.777	527.195	477.102	ciri_circ_9414,find_circ_8633
circ_8920	chr15	25737450	25742449	+	exon	ENSMUSG00000022272		-	-	-		-	-	-		561.851	790.793	954.203	ciri_circ_6818,find_circ_8920
circ_9825	chr15	64312349	64349913	-	exon	ENSMUSG00000022377		-	-	-		-	-	-		1123.7	1054.39	954.203	ciri_circ_6832,find_circ_9825
circ_10274	chr7	51936554	51953301	+	exon	ENSMUSG00000030498		-	-	-		-	-	-		842.777	527.195	715.652	ciri_circ_3238,find_circ_10274
circ_10510	chr3	109525869	109528384	+	exon	ENSMUSG00000033721		-	-	-		-	-	-		1966.48	1317.99	954.203	ciri_circ_10856,find_circ_10510
circ_10742	chr5	110151527	110164093	+	exon	ENSMUSG00000014668		-	-	-		-	-	-		561.851	527.195	477.102	ciri_circ_4967,find_circ_10742
circ_10767	chr3	109503410	109528384	+	exon	ENSMUSG00000033721		-	-	-		-	-	-		842.777	790.793	715.652	ciri_circ_6028,find_circ_10767
circ_10789	chrX	159913989	159919917	+	exon	ENSMUSG00000040990		-	-	-		-	-	-		561.851	527.195	477.102	ciri_circ_3890,find_circ_10789
circ_10794	chr5	16560959	16578561	+	exon	ENSMUSG00000028864		-	-	-		-	-	-		561.851	527.195	477.102	ciri_circ_11648,find_circ_10794
circ_10829	chr10	117280641	117289197	-	intergenic region	n/a		-	-	-		-	-	-		1123.7	1317.99	2146.96	ciri_circ_5497,find_circ_10829
circ_10859	chr13	9122108	9151224	+	exon	ENSMUSG00000033499		-	-	-		-	-	-		561.851	527.195	477.102	ciri_circ_6696,find_circ_10859
circ_10941	chr11	98950245	98950795	+	exon	ENSMUSG00000037992		-	-	-		-	-	-		842.777	527.195	477.102	ciri_circ_4104,find_circ_10941
circ_4	chr6	17491227	17492437	+	exon	ENSMUSG00000009376		429.618	-	908.397		-	-	-		842.777	-	477.102	ciri_circ_2922,find_circ_4
circ_18	chr5	100363828	100365994	-	exon	ENSMUSG00000035325		644.427	-	-		555.562	-	-		-	1054.39	954.203	ciri_circ_2772,find_circ_18
circ_39	chr5	107788199	107799260	-	exon	ENSMUSG00000011831		644.427	643.385	-		-	-	-		-	790.793	715.652	ciri_circ_2811,find_circ_39
circ_93	chr15	12136396	12140652	+	exon	ENSMUSG00000022201		644.427	428.923	1135.5		370.374	-	-		-	-	-	ciri_circ_1115,find_circ_93
circ_112	chr19	40336986	40365166	-	exon	ENSMUSG00000025006		429.618	428.923	-		370.374	402.254	-		-	-	-	ciri_circ_1904,find_circ_112
circ_114	chr19	57638452	57657238	+	exon	ENSMUSG00000054843		429.618	-	454.199		740.749	-	391.945		-	-	-	ciri_circ_1942,find_circ_114
circ_116	chr12	111858210	111872433	-	exon	ENSMUSG00000021285		429.618	-	-		-	-	-		561.851	790.793	477.102	ciri_circ_804,find_circ_116
circ_127	chrX	152245102	152246413	+	exon	ENSMUSG00000025332		429.618	428.923	-		-	-	587.917		-	-	477.102	ciri_circ_3888,find_circ_127
circ_167	chr3	152738186	152766523	+	exon	ENSMUSG00000039047		429.618	428.923	681.298		370.374	-	-		-	-	-	ciri_circ_2483,find_circ_167
circ_185	chr15	100469685	100476886	+	exon	ENSMUSG00000037353		859.236	643.385	-		-	603.381	783.89		-	-	-	ciri_circ_1257,find_circ_185
circ_218	chr15	89094137	89096819	+	exon	ENSMUSG00000035757		644.427	-	454.199		555.562	-	-		-	527.195	-	ciri_circ_1232,find_circ_218
circ_240	chr12	108648315	108653099	+	exon	ENSMUSG00000021262		429.618	643.385	-		1111.12	603.381	-		-	-	-	ciri_circ_794,find_circ_240
circ_270	chr14	31061469	31074982	+	exon	ENSMUSG00000042323		429.618	-	-		-	402.254	391.945		-	527.195	-	ciri_circ_985,find_circ_270
circ_287	chr1	75384656	75402473	+	exon	ENSMUSG00000026207		1074.04	428.923	-		-	603.381	-		-	527.195	-	ciri_circ_65,find_circ_287
circ_293	chr14	78982236	78984302	+	exon	ENSMUSG00000058997		429.618	857.846	-		370.374	-	-		-	-	715.652	ciri_circ_1060,find_circ_293
circ_298	chr9	32728675	32734188	+	exon	ENSMUSG00000032035		429.618	-	681.298		555.562	402.254	-		-	-	-	ciri_circ_3638,find_circ_298
circ_305	chr2	160670100	160687743	+	exon	ENSMUSG00000070544		429.618	-	454.199		-	-	391.945		-	527.195	-	ciri_circ_5985,find_circ_305
circ_308	chr14	123840563	123857579	+	exon	ENSMUSG00000032925		1074.04	-	1135.5		370.374	-	391.945		-	-	-	ciri_circ_1097,find_circ_308
circ_312	chr3	36556863	36562164	+	exon	ENSMUSG00000027714		429.618	-	-		-	402.254	-		561.851	-	477.102	ciri_circ_2289,find_circ_312
circ_350	chrX	164280129	164300430	+	exon	ENSMUSG00000031379		644.427	-	454.199		740.749	603.381	-		-	-	-	ciri_circ_3895,find_circ_350
circ_360	chr17	88462713	88463263	+	exon	ENSMUSG00000034998		1288.85	643.385	-		-	804.508	-		-	-	1431.3	ciri_circ_1678,find_circ_360
circ_382	chr2	30017198	30020047	+	exon	ENSMUSG00000057738		644.427	-	-		740.749	-	783.89		-	-	954.203	ciri_circ_2012,find_circ_382
circ_387	chr13	5880824	5885698	+	intergenic region	n/a		429.618	-	454.199		-	603.381	-		-	-	477.102	ciri_circ_810,find_circ_387
circ_421	chr19	28317254	28357952	-	exon	ENSMUSG00000052942		644.427	643.385	-		-	603.381	-		561.851	-	-	ciri_circ_1859,find_circ_421
circ_429	chr3	104649258	104651029	+	exon	ENSMUSG00000032902		429.618	-	908.397		925.936	603.381	-		-	-	-	ciri_circ_2410,find_circ_429
circ_444	chr11	23649270	23649484	-	exon	ENSMUSG00000020283		644.427	857.846	-		555.562	-	391.945		-	-	-	ciri_circ_434,find_circ_444
circ_448	chr7	130507482	130516168	-	exon	ENSMUSG00000030850		429.618	-	681.298		925.936	-	-		-	-	715.652	ciri_circ_3376,find_circ_448
circ_456	chr11	119151028	119154075	-	exon	ENSMUSG00000039976		429.618	-	454.199		-	-	-		561.851	527.195	-	ciri_circ_5571,find_circ_456
circ_457	chr2	68390914	68410141	-	exon	ENSMUSG00000027030		429.618	428.923	-		370.374	-	-		-	1054.39	-	ciri_circ_2070,find_circ_457
circ_458	chr6	124817318	124817812	-	exon	ENSMUSG00000038429		429.618	428.923	-		-	-	391.945		-	527.195	-	ciri_circ_3154,find_circ_458
circ_464	chr4	152206764	152223162	+	exon	ENSMUSG00000028937		429.618	-	454.199		-	402.254	391.945		-	-	-	ciri_circ_2671,find_circ_464
circ_468	chr6	72128264	72153718	+	exon	ENSMUSG00000056091		644.427	428.923	-		-	-	-		-	527.195	477.102	ciri_circ_3038,find_circ_468
circ_482	chr19	16219588	16226415	+	intron	ENSMUSG00000024639		644.427	-	-		555.562	402.254	587.917		-	-	-	ciri_circ_1844,find_circ_482
circ_491	chr5	5675841	5683417	-	exon	ENSMUSG00000015653		1288.85	643.385	-		740.749	1206.76	-		-	-	-	ciri_circ_2683,find_circ_491
circ_494	chr1	165911288	165913349	-	exon	ENSMUSG00000026565		859.236	-	-		-	402.254	391.945		1404.63	-	-	ciri_circ_152,find_circ_494
circ_498	chr5	90250375	90258550	-	exon	ENSMUSG00000055204		644.427	-	-		370.374	402.254	-		561.851	-	-	ciri_circ_2762,find_circ_498
circ_506	chr17	28428352	28429363	-	exon	ENSMUSG00000024222		1074.04	428.923	-		555.562	-	391.945		-	-	-	ciri_circ_1488,find_circ_506
circ_534	chr3	99187481	99205310	+	exon	ENSMUSG00000004233		429.618	-	-		740.749	402.254	391.945		-	-	-	ciri_circ_2398,find_circ_534
circ_538	chr10	70167002	70175167	+	exon	ENSMUSG00000048701		429.618	428.923	-		370.374	-	-		561.851	-	-	ciri_circ_307,find_circ_538
circ_542	chr2	139731870	139740403	+	exon	ENSMUSG00000074766		429.618	-	908.397		370.374	402.254	-		-	-	-	ciri_circ_2199,find_circ_542
circ_544	chr19	4342847	4394892	-	exon	ENSMUSG00000054611		644.427	-	681.298		-	402.254	-		842.777	-	-	ciri_circ_1813,find_circ_544
circ_552	chr2	13216770	13241795	-	exon	ENSMUSG00000026727		859.236	-	-		925.936	804.508	391.945		-	-	-	ciri_circ_1976,find_circ_552
circ_558	chr17	84557372	84577316	+	exon	ENSMUSG00000040852		859.236	643.385	-		-	-	783.89		-	-	477.102	ciri_circ_1665,find_circ_558
circ_569	chr4	114580291	114586632	+	exon	ENSMUSG00000070867		429.618	-	454.199		-	-	391.945		561.851	-	-	ciri_circ_2602,find_circ_569
circ_582	chr16	11199385	11199719	-	exon	ENSMUSG00000005846		429.618	-	454.199		555.562	-	391.945		-	-	-	ciri_circ_1268,find_circ_582
circ_595	chr17	55868303	55939993	-	intergenic region	n/a		429.618	643.385	-		-	-	587.917		561.851	-	-	ciri_circ_1590,find_circ_595
circ_597	chr8	84771784	84779275	-	intron	ENSMUSG00000001911		644.427	428.923	-		-	-	391.945		-	-	954.203	ciri_circ_3529,find_circ_597
circ_608	chr7	111548676	111599123	-	exon	ENSMUSG00000038296		429.618	428.923	-		-	-	391.945		561.851	-	-	ciri_circ_3321,find_circ_608
circ_612	chr11	120967995	120973969	-	exon	ENSMUSG00000025162		1288.85	-	-		370.374	804.508	391.945		-	-	-	ciri_circ_622,find_circ_612
circ_620	chr14	121101989	121115336	+	intron	ENSMUSG00000025555		429.618	-	454.199		-	402.254	-		-	-	477.102	ciri_circ_1088,find_circ_620
circ_628	chr4	141516836	141522392	-	exon	ENSMUSG00000040761		429.618	857.846	454.199		740.749	-	-		-	-	-	ciri_circ_2644,find_circ_628
circ_649	chr11	106544172	106568627	-	exon	ENSMUSG00000040548		429.618	428.923	-		925.936	-	-		-	-	477.102	ciri_circ_4114,find_circ_649
circ_656	chr5	122489238	122491785	-	exon	ENSMUSG00000029467		429.618	857.846	-		370.374	-	-		842.777	-	-	ciri_circ_2850,find_circ_656
circ_675	chr18	53895531	53906669	+	exon	ENSMUSG00000073563		644.427	1072.31	-		740.749	402.254	-		-	-	-	ciri_circ_1757,find_circ_675
circ_713	chr17	34732724	34812882	-	intergenic region	n/a		4296.18	-	-		3703.74	-	-		5899.44	6326.34	-	ciri_circ_1526,find_circ_713
circ_737	chr4	86774238	86781711	+	exon	ENSMUSG00000038024		644.427	-	454.199		370.374	603.381	-		-	-	-	ciri_circ_2571,find_circ_737
circ_752	chr1	24704821	24731899	+	exon	ENSMUSG00000073725		429.618	428.923	-		-	1206.76	-		-	-	477.102	ciri_circ_22,find_circ_752
circ_778	chr11	83948445	83949694	+	exon	ENSMUSG00000020677		859.236	-	454.199		370.374	804.508	-		-	-	-	ciri_circ_547,find_circ_778
circ_779	chr1	79796826	79821557	-	exon	ENSMUSG00000026249		644.427	643.385	908.397		555.562	-	-		-	-	-	ciri_circ_70,find_circ_779
circ_780	chr15	35533296	35576526	+	exon	ENSMUSG00000037646		429.618	643.385	681.298		-	-	391.945		-	-	-	ciri_circ_1144,find_circ_780
circ_788	chr9	96731292	96732313	-	exon	ENSMUSG00000040433		429.618	-	-		370.374	-	587.917		-	527.195	-	ciri_circ_3749,find_circ_788
circ_794	chr6	3551013	3578915	+	exon	ENSMUSG00000001376		859.236	428.923	-		370.374	402.254	-		-	-	-	ciri_circ_2909,find_circ_794
circ_795	chr16	58424561	58464327	+	exon	ENSMUSG00000035107		429.618	1072.31	-		-	804.508	587.917		-	-	-	ciri_circ_1317,find_circ_795
circ_796	chr4	83535790	83549777	+	exon	ENSMUSG00000052407		429.618	428.923	-		-	402.254	-		-	-	477.102	ciri_circ_8203,find_circ_796
circ_801	chr17	62650842	62651134	-	exon	ENSMUSG00000048915		644.427	-	-		370.374	402.254	587.917		-	-	-	ciri_circ_1597,find_circ_801
circ_816	chr8	79343654	79372364	-	exon	ENSMUSG00000031681		429.618	428.923	-		555.562	-	-		-	527.195	-	ciri_circ_3518,find_circ_816
circ_825	chr18	5705043	5761433	+	exon	ENSMUSG00000024238		644.427	1072.31	-		1666.69	-	-		-	-	715.652	ciri_circ_1689,find_circ_825
circ_835	chr11	121707730	121715903	+	exon	ENSMUSG00000039208		429.618	428.923	454.199		-	-	-		-	-	477.102	ciri_circ_5575,find_circ_835
circ_842	chr9	80087430	80093641	+	exon	ENSMUSG00000034252		429.618	-	454.199		-	-	1371.81		-	1054.39	-	ciri_circ_3724,find_circ_842
circ_843	chr10	92044935	92136690	-	intergenic region	n/a		429.618	-	681.298		-	402.254	-		-	527.195	-	ciri_circ_340,find_circ_843
circ_866	chr10	80000712	80001090	+	exon	ENSMUSG00000035722		429.618	428.923	-		-	603.381	587.917		-	-	-	ciri_circ_316,find_circ_866
circ_883	chr19	3518245	3526934	-	exon	ENSMUSG00000024908		429.618	428.923	-		370.374	-	-		-	527.195	-	ciri_circ_1811,find_circ_883
circ_888	chr8	22535019	22540445	+	exon	ENSMUSG00000037656		429.618	-	681.298		-	-	783.89		561.851	-	-	ciri_circ_3411,find_circ_888
circ_899	chr10	31534663	31534896	-	exon	ENSMUSG00000063760		644.427	-	454.199		-	-	-		561.851	1317.99	-	ciri_circ_248,find_circ_899
circ_900	chr12	83568849	83595322	-	exon	ENSMUSG00000042628		644.427	-	908.397		370.374	-	-		-	527.195	-	ciri_circ_760,find_circ_900
circ_913	chr13	104294447	104314383	+	exon	ENSMUSG00000046169		429.618	-	-		-	402.254	587.917		-	790.793	-	ciri_circ_935,find_circ_913
circ_942	chr8	119510254	119515709	-	exon	ENSMUSG00000031835		859.236	-	-		925.936	-	391.945		-	527.195	-	ciri_circ_3582,find_circ_942
circ_946	chr18	5063194	5088814	+	exon	ENSMUSG00000024236		644.427	643.385	1135.5		-	603.381	-		-	-	-	ciri_circ_1681,find_circ_946
circ_961	chr18	34473550	34494776	-	exon	ENSMUSG00000036501		859.236	643.385	-		-	402.254	-		-	-	715.652	ciri_circ_1732,find_circ_961
circ_979	chr2	104655689	104660714	+	exon	ENSMUSG00000027176		644.427	857.846	454.199		-	-	-		-	527.195	-	ciri_circ_2126,find_circ_979
circ_986	chr1	16440323	16463194	-	exon	ENSMUSG00000025920		859.236	-	-		-	402.254	391.945		842.777	-	-	ciri_circ_18,find_circ_986
circ_998	chr13	28608518	28634406	-	intron	ENSMUSG00000085936		644.427	857.846	-		-	-	391.945		1123.7	-	-	ciri_circ_826,find_circ_998
circ_1011	chr6	12500987	12555726	-	exon	ENSMUSG00000032625		644.427	643.385	-		-	402.254	1371.81		-	-	-	ciri_circ_2917,find_circ_1011
circ_1018	chr2	32809101	32812105	-	exon	ENSMUSG00000026797		429.618	-	-		-	402.254	587.917		-	527.195	-	ciri_circ_2026,find_circ_1018
circ_1078	chr15	40752896	40774146	+	exon	ENSMUSG00000022306		644.427	1286.77	681.298		-	804.508	-		-	-	-	ciri_circ_1149,find_circ_1078
circ_1080	chr2	60779731	60792780	-	exon	ENSMUSG00000026970		644.427	857.846	-		-	402.254	587.917		-	-	-	ciri_circ_2062,find_circ_1080
circ_1098	chr3	122947361	122969249	-	exon	ENSMUSG00000039701		429.618	-	-		370.374	804.508	391.945		-	-	-	ciri_circ_6040,find_circ_1098
circ_1107	chr5	30247463	30257820	+	exon	ENSMUSG00000075703		429.618	-	-		-	-	-		561.851	527.195	715.652	ciri_circ_2710,find_circ_1107
circ_1144	chr10	92075513	92136690	-	exon	ENSMUSG00000112117		644.427	428.923	-		925.936	-	391.945		-	-	-	ciri_circ_343,find_circ_1144
circ_1153	chr10	12713254	12727912	-	exon	ENSMUSG00000019820		429.618	-	-		-	402.254	783.89		-	-	1192.75	ciri_circ_228,find_circ_1153
circ_1176	chr15	102299803	102304145	+	exon	ENSMUSG00000058290		429.618	-	454.199		-	-	587.917		-	-	1431.3	ciri_circ_1258,find_circ_1176
circ_1178	chr19	30039064	30056494	+	exon	ENSMUSG00000024817		859.236	-	-		740.749	-	391.945		561.851	-	-	ciri_circ_1872,find_circ_1178
circ_1190	chr2	118033832	118037425	-	exon	ENSMUSG00000087203		859.236	-	681.298		555.562	-	-		561.851	-	-	ciri_circ_2150,find_circ_1190
circ_1193	chr15	68101471	68119074	-	exon	ENSMUSG00000022335		429.618	-	-		925.936	-	391.945		561.851	-	-	ciri_circ_1186,find_circ_1193
circ_1223	chr1	93714898	93725316	-	exon	ENSMUSG00000026279		644.427	-	-		-	-	587.917		-	527.195	715.652	ciri_circ_87,find_circ_1223
circ_1232	chr17	34719526	34801220	+	intergenic region	n/a		2148.09	-	2952.29		2592.62	3218.03	-		-	-	-	ciri_circ_1519,find_circ_1232
circ_1236	chr19	34587061	34607998	+	intergenic region	n/a		34369.4	-	-		23148.4	17699.2	-		37363.1	-	-	ciri_circ_1883,find_circ_1236
circ_1278	chr9	64896334	64897430	+	exon	ENSMUSG00000053641		429.618	643.385	681.298		740.749	-	-		-	-	-	ciri_circ_3684,find_circ_1278
circ_1286	chr5	29287391	29346906	-	exon	ENSMUSG00000010721		644.427	428.923	-		-	402.254	-		561.851	-	-	ciri_circ_2705,find_circ_1286
circ_1290	chr9	110182922	110222156	+	exon	ENSMUSG00000032481		429.618	-	-		1296.31	-	587.917		-	527.195	-	ciri_circ_3773,find_circ_1290
circ_1301	chr6	85696576	85750213	+	intergenic region	n/a		1074.04	-	-		-	-	1567.78		2247.41	-	1669.86	ciri_circ_3053,find_circ_1301
circ_1306	chr2	22960707	22971259	-	exon	ENSMUSG00000058835		429.618	-	-		370.374	1206.76	-		-	1054.39	-	ciri_circ_1994,find_circ_1306
circ_1313	chr5	93154870	93162292	+	exon	ENSMUSG00000058013		429.618	643.385	-		-	402.254	-		-	527.195	-	ciri_circ_2766,find_circ_1313
circ_1315	chr15	80884207	80902712	+	exon	ENSMUSG00000047888		644.427	-	-		555.562	603.381	-		-	-	715.652	ciri_circ_1213,find_circ_1315
circ_1325	chr14	45614163	45629753	-	exon	ENSMUSG00000037697		1288.85	-	-		-	-	1175.83		-	527.195	477.102	ciri_circ_1000,find_circ_1325
circ_1343	chr1	157286731	157299264	-	exon	ENSMUSG00000070565		859.236	428.923	-		-	-	-		-	527.195	477.102	ciri_circ_140,find_circ_1343
circ_1389	chr9	108218013	108218410	-	exon	ENSMUSG00000039952		429.618	428.923	-		370.374	402.254	-		-	-	-	ciri_circ_3764,find_circ_1389
circ_1393	chr11	107592706	107620214	+	exon	ENSMUSG00000020721		429.618	-	-		-	804.508	391.945		-	527.195	-	ciri_circ_610,find_circ_1393
circ_1400	chr2	128147085	128158533	+	exon	ENSMUSG00000027381		429.618	428.923	454.199		-	-	391.945		-	-	-	ciri_circ_2185,find_circ_1400
circ_1408	chrX	48553978	48567113	-	exon	ENSMUSG00000036916		429.618	857.846	681.298		-	-	-		561.851	-	-	ciri_circ_3813,find_circ_1408
circ_1426	chr4	133719537	133723051	-	exon	ENSMUSG00000007880		644.427	1072.31	454.199		-	-	391.945		-	-	-	ciri_circ_2632,find_circ_1426
circ_1432	chr12	3442474	3496936	+	exon	ENSMUSG00000037486		644.427	-	-		-	-	587.917		-	527.195	477.102	ciri_circ_630,find_circ_1432
circ_1440	chr2	16729253	16751344	+	exon	ENSMUSG00000026748		429.618	857.846	908.397		-	-	-		-	-	477.102	ciri_circ_4650,find_circ_1440
circ_1459	chr9	43791037	43794241	+	exon	ENSMUSG00000032012		1288.85	428.923	454.199		740.749	-	-		-	-	-	ciri_circ_3642,find_circ_1459
circ_1461	chr8	127370248	127389498	+	exon	ENSMUSG00000025812		644.427	428.923	-		555.562	402.254	-		-	-	-	ciri_circ_3594,find_circ_1461
circ_1465	chr17	78981774	78985353	-	exon	ENSMUSG00000024070		429.618	-	-		555.562	-	-		561.851	-	477.102	ciri_circ_1655,find_circ_1465
circ_1468	chr5	31820478	31831159	+	exon	ENSMUSG00000052139		859.236	-	454.199		1111.12	-	-		1685.55	-	-	ciri_circ_2714,find_circ_1468
circ_1492	chr11	53399589	53404602	+	exon	ENSMUSG00000049470		644.427	428.923	908.397		370.374	-	-		-	-	-	ciri_circ_478,find_circ_1492
circ_1571	chr1	177078774	177131096	-	exon	ENSMUSG00000019699		429.618	428.923	-		-	402.254	783.89		-	-	-	ciri_circ_177,find_circ_1571
circ_1597	chr10	12633944	12688427	-	exon	ENSMUSG00000019820		429.618	428.923	454.199		-	1005.64	-		-	-	-	ciri_circ_226,find_circ_1597
circ_1600	chr10	106962962	107004815	-	exon	ENSMUSG00000035948		429.618	857.846	-		370.374	-	391.945		-	-	-	ciri_circ_359,find_circ_1600
circ_1612	chrX	98695999	98726115	-	exon	ENSMUSG00000031214		644.427	-	454.199		-	603.381	-		-	-	715.652	ciri_circ_3841,find_circ_1612
circ_1618	chrX	133625269	133682188	-	exon	ENSMUSG00000051323		429.618	-	-		-	402.254	-		842.777	527.195	-	ciri_circ_3857,find_circ_1618
circ_1623	chr4	58832704	58841605	-	exon	ENSMUSG00000050812		429.618	428.923	-		555.562	-	-		561.851	-	-	ciri_circ_7214,find_circ_1623
circ_1641	chr5	90298540	90304065	-	exon	ENSMUSG00000055204		859.236	-	454.199		-	-	783.89		-	-	954.203	ciri_circ_2763,find_circ_1641
circ_1647	chr13	109933868	109939361	+	exon	ENSMUSG00000021699		429.618	643.385	-		-	-	587.917		-	790.793	-	ciri_circ_944,find_circ_1647
circ_1668	chr3	9278254	9281126	+	exon	ENSMUSG00000069114		1288.85	428.923	-		740.749	402.254	-		-	-	-	ciri_circ_2279,find_circ_1668
circ_1684	chr9	32461251	32476773	-	exon	ENSMUSG00000016087		429.618	-	-		1111.12	-	1371.81		561.851	-	-	ciri_circ_3637,find_circ_1684
circ_1696	chr15	99783520	99796799	-	exon	ENSMUSG00000023022		644.427	-	-		555.562	-	979.862		-	-	477.102	ciri_circ_1251,find_circ_1696
circ_1697	chr17	75273867	75296343	+	exon	ENSMUSG00000001870		644.427	428.923	-		-	-	-		-	527.195	954.203	ciri_circ_1646,find_circ_1697
circ_1737	chr18	31771670	31772114	+	exon	ENSMUSG00000041915		429.618	643.385	454.199		-	-	391.945		-	-	-	ciri_circ_4546,find_circ_1737
circ_1740	chr2	128729186	128738369	+	exon	ENSMUSG00000014361		859.236	-	-		370.374	603.381	391.945		-	-	-	ciri_circ_2189,find_circ_1740
circ_1785	chr1	168183530	168195883	-	exon	ENSMUSG00000052534		429.618	428.923	-		-	-	-		561.851	-	477.102	ciri_circ_155,find_circ_1785
circ_1786	chr7	127519581	127525905	+	exon	ENSMUSG00000053877		429.618	643.385	-		-	402.254	-		-	-	1192.75	ciri_circ_3369,find_circ_1786
circ_1793	chr8	77563976	77565146	+	exon	ENSMUSG00000037134		1718.47	-	681.298		370.374	-	391.945		-	-	-	ciri_circ_3503,find_circ_1793
circ_1795	chr3	119740315	119761778	-	exon	ENSMUSG00000028134		859.236	643.385	-		-	804.508	391.945		-	-	-	ciri_circ_2427,find_circ_1795
circ_1800	chr13	109740387	109772680	+	exon	ENSMUSG00000021699		644.427	428.923	908.397		740.749	-	-		-	-	-	ciri_circ_943,find_circ_1800
circ_1801	chr2	121235573	121236869	-	exon	ENSMUSG00000043909		429.618	-	454.199		370.374	-	-		842.777	-	-	ciri_circ_2168,find_circ_1801
circ_1814	chr3	159897331	159901543	+	exon	ENSMUSG00000028173		429.618	857.846	-		-	804.508	391.945		-	-	-	ciri_circ_2484,find_circ_1814
circ_1831	chr1	106000931	106031233	+	exon	ENSMUSG00000038866		429.618	428.923	-		740.749	1005.64	-		-	-	-	ciri_circ_93,find_circ_1831
circ_1839	chr4	141483725	141494398	-	exon	ENSMUSG00000040761		644.427	643.385	-		925.936	1609.02	-		-	-	-	ciri_circ_2643,find_circ_1839
circ_1845	chr16	92076720	92079226	+	exon	ENSMUSG00000089774		429.618	-	908.397		-	-	979.862		-	-	477.102	ciri_circ_1329,find_circ_1845
circ_1863	chr6	148821595	148824485	-	exon	ENSMUSG00000040029		644.427	-	-		370.374	402.254	391.945		-	-	-	ciri_circ_3187,find_circ_1863
circ_1895	chr15	81600908	81616863	+	exon	ENSMUSG00000055024		429.618	-	454.199		-	402.254	-		561.851	-	-	ciri_circ_7916,find_circ_1895
circ_1913	chr18	24506834	24509922	-	exon	ENSMUSG00000040446		644.427	-	1135.5		925.936	-	-		-	-	715.652	ciri_circ_1720,find_circ_1913
circ_1927	chr10	49535318	49578302	-	exon	ENSMUSG00000056073		644.427	-	-		740.749	603.381	587.917		-	-	-	ciri_circ_276,find_circ_1927
circ_1951	chr3	103769398	103778299	-	exon	ENSMUSG00000008730		1288.85	428.923	454.199		-	-	979.862		-	-	-	ciri_circ_2407,find_circ_1951
circ_1968	chr18	73969891	73971276	-	exon	ENSMUSG00000024558		429.618	-	454.199		-	402.254	1175.83		-	-	-	ciri_circ_1785,find_circ_1968
circ_1985	chr4	143162056	143180991	-	exon	ENSMUSG00000057637		429.618	-	-		-	-	391.945		561.851	-	477.102	ciri_circ_2646,find_circ_1985
circ_1992	chr12	69640054	69658078	-	exon	ENSMUSG00000034801		429.618	-	-		-	402.254	587.917		561.851	-	-	ciri_circ_739,find_circ_1992
circ_1996	chr10	49523682	49528040	-	exon	ENSMUSG00000056073		429.618	-	454.199		925.936	402.254	-		-	-	-	ciri_circ_273,find_circ_1996
circ_2007	chr15	12339628	12349788	+	exon	ENSMUSG00000022200		644.427	-	-		-	-	783.89		561.851	790.793	-	ciri_circ_1119,find_circ_2007
circ_2016	chr3	60595594	60615773	+	exon	ENSMUSG00000027763		644.427	-	454.199		1111.12	1407.89	-		-	-	-	ciri_circ_2315,find_circ_2016
circ_2055	chr2	77124122	77170607	-	exon	ENSMUSG00000044033		644.427	-	454.199		925.936	402.254	-		-	-	-	ciri_circ_2096,find_circ_2055
circ_2066	chr9	108024103	108032209	+	exon	ENSMUSG00000093456		429.618	1286.77	-		370.374	-	-		-	1054.39	-	ciri_circ_3763,find_circ_2066
circ_2099	chr3	117829577	117840038	-	exon	ENSMUSG00000028007		859.236	857.846	-		-	-	587.917		-	-	477.102	ciri_circ_2425,find_circ_2099
circ_2118	chr2	153187263	153189077	+	exon	ENSMUSG00000068040		644.427	-	-		370.374	402.254	-		-	-	1192.75	ciri_circ_7118,find_circ_2118
circ_2135	chr12	51648006	51661713	-	exon	ENSMUSG00000020954		859.236	-	-		-	804.508	-		-	1054.39	715.652	ciri_circ_671,find_circ_2135
circ_2137	chr11	86319348	86332028	-	exon	ENSMUSG00000034297		429.618	-	-		555.562	402.254	-		-	527.195	-	ciri_circ_6628,find_circ_2137
circ_2140	chr15	35770456	35770863	+	exon	ENSMUSG00000037646		429.618	-	454.199		370.374	-	-		-	527.195	-	ciri_circ_6823,find_circ_2140
circ_2145	chr18	44510097	44519659	-	exon	ENSMUSG00000071856		1288.85	-	-		-	804.508	391.945		1123.7	-	-	ciri_circ_1751,find_circ_2145
circ_2154	chr7	73501909	73503514	-	exon	ENSMUSG00000078671		859.236	-	454.199		-	603.381	587.917		-	-	-	ciri_circ_3255,find_circ_2154
circ_2158	chr1	44766014	44788542	+	exon	ENSMUSG00000056870		429.618	-	454.199		740.749	-	391.945		-	-	-	ciri_circ_42,find_circ_2158
circ_2159	chr17	3159163	3178348	+	exon	ENSMUSG00000046201		644.427	-	-		-	603.381	783.89		-	-	715.652	ciri_circ_1344,find_circ_2159
circ_2161	chr2	25952678	25966948	-	exon	ENSMUSG00000026933		429.618	-	-		-	-	-		1123.7	790.793	715.652	ciri_circ_4661,find_circ_2161
circ_2163	chr4	151950394	151957204	+	exon	ENSMUSG00000039768		859.236	-	-		-	-	-		561.851	1054.39	477.102	ciri_circ_2669,find_circ_2163
circ_2222	chr2	54477648	54516681	+	exon	ENSMUSG00000060988		429.618	428.923	454.199		-	-	-		561.851	-	-	ciri_circ_2057,find_circ_2222
circ_2229	chr2	91810030	91825352	+	exon	ENSMUSG00000040506		1074.04	-	-		925.936	402.254	-		-	-	1192.75	ciri_circ_2112,find_circ_2229
circ_2246	chr3	88901578	88908789	+	exon	ENSMUSG00000054199		429.618	-	454.199		925.936	1005.64	-		-	-	-	ciri_circ_2375,find_circ_2246
circ_2266	chr11	61519487	61523193	-	exon	ENSMUSG00000001036		859.236	-	-		370.374	804.508	587.917		-	-	-	ciri_circ_492,find_circ_2266
circ_2287	chr14	65075584	65080475	-	exon	ENSMUSG00000021978		644.427	-	454.199		-	402.254	-		842.777	-	-	ciri_circ_1046,find_circ_2287
circ_2298	chr6	120870766	120876346	+	exon	ENSMUSG00000009112		429.618	428.923	-		370.374	-	391.945		-	-	-	ciri_circ_3129,find_circ_2298
circ_2304	chr11	62128200	62132454	+	exon	ENSMUSG00000042331		644.427	-	-		-	603.381	391.945		-	-	954.203	ciri_circ_498,find_circ_2304
circ_2328	chr13	93341756	93349297	+	exon	ENSMUSG00000007617		429.618	428.923	-		-	402.254	391.945		-	-	-	ciri_circ_918,find_circ_2328
circ_2348	chr12	101945400	101948439	-	exon	ENSMUSG00000021189		859.236	643.385	-		-	603.381	587.917		-	-	-	ciri_circ_781,find_circ_2348
circ_2349	chr7	29397151	29401149	-	exon	ENSMUSG00000030583		429.618	-	-		370.374	402.254	-		-	527.195	-	ciri_circ_3205,find_circ_2349
circ_2360	chr15	79541034	79542586	-	exon	ENSMUSG00000055065		429.618	-	-		-	402.254	587.917		1404.63	-	-	ciri_circ_1210,find_circ_2360
circ_2373	chr9	78131295	78141273	+	exon	ENSMUSG00000009828		429.618	428.923	-		-	402.254	587.917		-	-	-	ciri_circ_3721,find_circ_2373
circ_2389	chr11	3164557	3179507	-	exon	ENSMUSG00000023764		429.618	-	-		370.374	-	391.945		-	-	477.102	ciri_circ_398,find_circ_2389
circ_2433	chr10	28465758	28496945	+	exon	ENSMUSG00000019889		859.236	428.923	-		925.936	1005.64	-		-	-	-	ciri_circ_244,find_circ_2433
circ_2444	chr5	88614941	88617436	+	exon	ENSMUSG00000029291		429.618	428.923	-		740.749	603.381	-		-	-	-	ciri_circ_2760,find_circ_2444
circ_2448	chr15	64295669	64349913	-	intron	ENSMUSG00000022377		1288.85	-	-		370.374	-	587.917		-	790.793	-	ciri_circ_1181,find_circ_2448
circ_2464	chr13	63190479	63210166	+	exon	ENSMUSG00000021458		429.618	428.923	-		-	-	-		-	527.195	477.102	ciri_circ_883,find_circ_2464
circ_2470	chr7	73468456	73484597	-	exon	ENSMUSG00000078671		644.427	1072.31	-		555.562	-	-		-	527.195	-	ciri_circ_3253,find_circ_2470
circ_2498	chr12	51716942	51730965	+	exon	ENSMUSG00000020955		429.618	-	-		370.374	-	391.945		1123.7	-	-	ciri_circ_674,find_circ_2498
circ_2506	chr17	27786071	27794063	-	exon	ENSMUSG00000056692		429.618	-	-		740.749	-	587.917		-	1317.99	-	ciri_circ_1480,find_circ_2506
circ_2510	chr2	122070865	122073005	-	exon	ENSMUSG00000033396		429.618	-	908.397		555.562	-	-		-	527.195	-	ciri_circ_5964,find_circ_2510
circ_2533	chr12	73926557	73932476	+	exon	ENSMUSG00000021109		644.427	-	1135.5		555.562	603.381	-		-	-	-	ciri_circ_746,find_circ_2533
circ_2538	chr7	116368747	116373850	-	exon	ENSMUSG00000030660		429.618	-	454.199		-	402.254	-		561.851	-	-	ciri_circ_3340,find_circ_2538
circ_2543	chr1	30837105	30863255	-	exon	ENSMUSG00000048874		644.427	1286.77	908.397		-	-	-		-	-	477.102	ciri_circ_26,find_circ_2543
circ_2550	chr7	34351286	34375392	-	exon	ENSMUSG00000066568		644.427	-	454.199		-	402.254	391.945		-	-	-	ciri_circ_3211,find_circ_2550
circ_2553	chr6	61310814	61313835	+	exon	ENSMUSG00000039578		644.427	1286.77	-		740.749	-	979.862		-	-	-	ciri_circ_3018,find_circ_2553
circ_2554	chr3	90043700	90047899	-	exon	ENSMUSG00000042520		644.427	-	681.298		-	-	587.917		842.777	-	-	ciri_circ_2383,find_circ_2554
[truncated: 2,038 more rows]
