# Supplementary material for: Dicalcium silicate microparticles modulate the differential expression of circRNAs and mRNAs in BMSCs and promote osteogenesisviacirc_1983–miR-6931–Gas7 interaction
Source: Royal Society of Chemistry journal article supplement (doi:10.1039/d0bm00459f), 2020-01-01
Supplement: d0bm00459f3.xlsx [file d0bm00459f3.xlsx]

## Sheet: table_S2
Supplementary Table 2. CircRNA significantly differential expressed in BMSCs.
circRNA ID1		OM vs PM			C2S vs OM		Type
		log2Fold2	Probability3		log2Fold2	Probability3
circ_1078		Inf	0.999973		1.69925	0.865196	Up
circ_1097		1.22996	0.891163		1.58369	0.953756	Up
circ_1356		0.876647	0.82365		0.991594	0.818325	Up
circ_1426		Inf	0.999315		2.46959	0.971288	Up
circ_1492		Inf	0.999315		2.41972	0.951269	Up
circ_1560		-2.49913	1		-0.993397	0.949633	Down
circ_167		Inf	0.999315		2.05572	0.829611	Up
circ_1737		Inf	0.999315		1.96217	0.829611	Up
circ_1804		Inf	1		0.917995	0.935249	Up
circ_1958		-1.81094	1		-0.65099	0.902372	Down
circ_1983		0.932998	0.969426		1.05599	0.929033	Up
circ_2201		0.780521	0.884538		1.37073	0.996795	Up
circ_2313		1.28044	0.845409		1.28697	0.815625	Up
circ_2318		1.71548	0.960405		1.15813	0.93661	Up
circ_2400		Inf	1		1.41125	0.880891	Up
circ_2411		1.28044	0.845409		1.29323	0.852813	Up
circ_2491		-1.68518	1		-0.86172	0.969373	Down
circ_2567		Inf	0.999315		2.45757	0.934331	Up
circ_2570		1.12099	0.873984		1.1779	0.903295	Up
circ_2585		-0.928777	0.850324		-1.30955	0.996402	Down
circ_265		0.665352	0.998788		0.624554	0.919737	Up
circ_2744		-1.44159	0.873768		-1.83176	0.904267	Down
circ_3118		Inf	1		1.81878	0.954599	Up
circ_3324		Inf	0.999315		2.40972	0.880656	Up
circ_34		0.630317	0.999304		0.821452	0.816359	Up
circ_3573		-1.3975	0.984717		-0.80453	0.891918	Down
circ_3592		Inf	0.999315		2.25363	0.836511	Up
circ_4360		-0.999298	0.927375		-1.13347	0.99201	Down
circ_4388		-2.32057	0.999284		-1.39114	0.812635	Down
circ_5536		-3.94265	0.999993		-Inf	0.998648	Down
circ_5598		-3.01126	0.967393		-Inf	0.998648	Down
circ_651		-0.985609	0.985809		-0.868874	0.999623	Down
circ_6773		-2.41375	0.854395		-Inf	0.998648	Down
circ_6950		-1.61441	0.876666		-Inf	0.999984	Down
circ_7035		-2.09088	0.910869		-Inf	0.999816	Down
circ_7182		-3.11396	0.979298		-Inf	0.998648	Down
circ_779		Inf	0.999775		1.983	0.904259	Up
circ_780		Inf	0.999315		2.16217	0.918075	Up
circ_8208		-2.03471	0.839673		-Inf	0.999816	Down
circ_8236		-2.23048	0.823208		-Inf	0.998648	Down
circ_895		-1.21795	0.91526		-2.56137	0.997911	Down
circ_915		Inf	1		1.31629	0.843354	Up
circ_93		Inf	0.999315		2.57624	0.971288	Up
circ_946		Inf	0.999775		2.00584	0.936696	Up
circ_988		-1.1295	0.953229		-0.998191	0.966794	Down
1Custom circRNA ID in this study.
2Probability value was derived from NOI-seq; 3Fold, fold change(Inf for infinite).
