# Supplementary material for: Dicalcium silicate microparticles modulate the differential expression of circRNAs and mRNAs in BMSCs and promote osteogenesisviacirc_1983–miR-6931–Gas7 interaction
Source: Royal Society of Chemistry journal article supplement (doi:10.1039/d0bm00459f), 2020-01-01
Supplement: d0bm00459f4.xlsx [file d0bm00459f4.xlsx]

## Sheet: table_S3_up
Supplementary Table 3. mRNA significantly differential expressed in BMSCs.
Symbl	Gene ID		OM vs PM				C2S vs OM				Pathway enrichment
			log2Fold1	P value2	q value3		log2Fold1	P value2	q value3		Cellular Component	Biological Process	Molecular Function	KEGG
2019-09-09	ENSMUSG00000059248		0.178325	0.00109563	0.00389247		0.272264	5.07e-08	1.02e-06		GO:0005874//microtubule;GO:0005856//cytoskeleton;GO:0031105//septin complex;GO:0005930//axoneme;GO:0048471//perinuclear region of cytoplasm;GO:0005737//cytoplasm;GO:0001725//stress fiber;GO:0015629//actin cytoskeleton;GO:0097730//non-motile cilium	GO:0007049//cell cycle;GO:1902857//positive regulation of non-motile cilium assembly;GO:0051291//protein heterooligomerization;GO:0051301//cell division	GO:0045296//cadherin binding;GO:0005525//GTP binding;GO:0000166//nucleotide binding	K16938//Bacterial invasion of epithelial cells
2210408F21Rik	ENSMUSG00000087380		0.554392	2.07e-07	1.32e-06		0.234797	0.00894633	0.0371747		-	-	-	-
2610021A01Rik	ENSMUSG00000091474		0.216651	0.0146144	0.0390095		0.247049	0.000374855	0.00267778		GO:0005622//intracellular	GO:0006355//regulation of transcription, DNA-templated	GO:0003700//transcription factor activity, sequence-specific DNA binding;GO:0046872//metal ion binding;GO:0003676//nucleic acid binding	-
4930471E19Rik	ENSMUSG00000112716		2.71475	8.62e-08	5.7e-07		0.678155	0.0118983	0.0467525		-	-	-	-
5430416N02Rik	ENSMUSG00000097772		0.293103	0.00167516	0.00572057		0.237294	0.00577915	0.0261075		-	-	-	-
5430430B14Rik	ENSMUSG00000109953		1.37718	2.22e-08	1.55e-07		0.504598	0.00541565	0.0247825		-	-	-	-
9130208D14Rik	ENSMUSG00000086513		1.23493	1.1e-12	1.13e-11		0.589661	8.46e-07	1.31e-05		-	-	-	-
9930111J21Rik1	ENSMUSG00000069893		1.193	4.25e-08	2.9e-07		0.478723	0.00281777	0.014542		GO:0005789//endoplasmic reticulum membrane;GO:0016020//membrane	GO:0006952//defense response;GO:0035458//cellular response to interferon-beta	GO:0005525//GTP binding;GO:0003924//GTPase activity	-
9930111J21Rik2	ENSMUSG00000069892		1.01492	1.63e-19	2.55e-18		0.642326	6.89e-16	4.32e-14		GO:0016020//membrane	-	GO:0005525//GTP binding	-
A3galt2	ENSMUSG00000028794		1.64551	0.00681367	0.0200259		0.986307	0.00571999	0.0259268		GO:0005794//Golgi apparatus;GO:0032580//Golgi cisterna membrane;GO:0016021//integral component of membrane;GO:0031982//vesicle;GO:0016020//membrane	GO:0006688//glycosphingolipid biosynthetic process;GO:0005975//carbohydrate metabolic process;GO:0030259//lipid glycosylation	GO:0047276//N-acetyllactosaminide 3-alpha-galactosyltransferase activity;GO:0016758//transferase activity, transferring hexosyl groups;GO:0046872//metal ion binding;GO:0016740//transferase activity;GO:0016757//transferase activity, transferring glycosyl groups;GO:0001962//alpha-1,3-galactosyltransferase activity	-
A830082K12Rik	ENSMUSG00000087143		1.19538	9.98e-13	1.03e-11		0.606115	6.2e-07	9.86e-06		-	-	-	-
Abca8a	ENSMUSG00000041828		3.4805	6.59e-86	5.76e-84		0.534922	1.8e-09	4.77e-08		GO:0005886//plasma membrane;GO:0005743//mitochondrial inner membrane;GO:0016020//membrane;GO:0016021//integral component of membrane	GO:0006869//lipid transport;GO:0006810//transport;GO:0055085//transmembrane transport	GO:0042626//ATPase activity, coupled to transmembrane movement of substances;GO:0016887//ATPase activity;GO:0005524//ATP binding;GO:0000166//nucleotide binding	K05650//ABC transporters
Abca8b	ENSMUSG00000020620		2.26362	2.57e-237	8.32e-235		0.171895	0.00180325	0.0100705		GO:0005886//plasma membrane;GO:0016020//membrane;GO:0005743//mitochondrial inner membrane;GO:0016021//integral component of membrane	GO:0006810//transport;GO:0006869//lipid transport;GO:0055085//transmembrane transport	GO:0016887//ATPase activity;GO:0005524//ATP binding;GO:0000166//nucleotide binding;GO:0042626//ATPase activity, coupled to transmembrane movement of substances	K05650//ABC transporters
Abcb7	ENSMUSG00000031333		0.257691	2.97e-05	0.000139781		0.259178	1.19e-05	0.000135653		GO:0005739//mitochondrion;GO:0016021//integral component of membrane;GO:0016020//membrane;GO:0005743//mitochondrial inner membrane	GO:0006879//cellular iron ion homeostasis;GO:0055085//transmembrane transport;GO:0006810//transport	GO:0042626//ATPase activity, coupled to transmembrane movement of substances;GO:0016887//ATPase activity;GO:0005524//ATP binding;GO:0000166//nucleotide binding	K05662//ABC transporters
Abcc5	ENSMUSG00000022822		0.758118	3.18e-12	3.15e-11		0.222349	0.00422869	0.0202707		GO:0016021//integral component of membrane;GO:0016020//membrane;GO:0005887//integral component of plasma membrane	GO:0006810//transport;GO:0015711//organic anion transport;GO:0055085//transmembrane transport	GO:0042626//ATPase activity, coupled to transmembrane movement of substances;GO:0005524//ATP binding;GO:0016887//ATPase activity;GO:0000166//nucleotide binding;GO:0008514//organic anion transmembrane transporter activity	K05668//ABC transporters
Abcf2	ENSMUSG00000028953		0.180009	0.000732729	0.00269632		0.251443	1.71e-07	3.05e-06		GO:0016020//membrane;GO:0005739//mitochondrion	-	GO:0000166//nucleotide binding;GO:0016887//ATPase activity;GO:0005524//ATP binding	-
Abhd2	ENSMUSG00000039202		0.820483	2.17e-23	4.1e-22		0.258634	5.63e-05	0.000532126		GO:0036126//sperm flagellum;GO:0097524//sperm plasma membrane;GO:0031410//cytoplasmic vesicle;GO:0001669//acrosomal vesicle;GO:0016021//integral component of membrane;GO:0002080//acrosomal membrane;GO:0016020//membrane;GO:0005886//plasma membrane	GO:0030336//negative regulation of cell migration;GO:0016042//lipid catabolic process;GO:0006629//lipid metabolic process;GO:0043401//steroid hormone mediated signaling pathway;GO:0046464//acylglycerol catabolic process;GO:0009611//response to wounding;GO:0048240//sperm capacitation;GO:0032570//response to progesterone;GO:0007340//acrosome reaction	GO:0016787//hydrolase activity;GO:0042562//hormone binding;GO:0047372//acylglycerol lipase activity;GO:0003707//steroid hormone receptor activity;GO:0052689//carboxylic ester hydrolase activity	-
AC159819.3	ENSMUSG00000111343		0.548463	0.00205651	0.00688609		0.489542	0.000458791	0.00318997		-	-	-	-
AC207128.1	ENSMUSG00000114822		2.73904	7.21e-05	0.000318084		0.91829	0.00976658	0.0399824		-	-	-	-
Ace	ENSMUSG00000020681		3.61151	4.38e-12	4.3e-11		0.882139	8.64e-05	0.000769246		GO:0009897//external side of plasma membrane;GO:0070062//extracellular exosome;GO:0005615//extracellular space;GO:0016021//integral component of membrane;GO:0005737//cytoplasm;GO:0005764//lysosome;GO:0005768//endosome;GO:0005886//plasma membrane;GO:0016020//membrane;GO:0005576//extracellular region	GO:0050435//amyloid-beta metabolic process;GO:0003081//regulation of systemic arterial blood pressure by renin-angiotensin;GO:0001822//kidney development;GO:0032092//positive regulation of protein binding;GO:0008217//regulation of blood pressure;GO:2000170//positive regulation of peptidyl-cysteine S-nitrosylation;GO:1902033//regulation of hematopoietic stem cell proliferation;GO:0010629//negative…	GO:0051019//mitogen-activated protein kinase binding;GO:0070573//metallodipeptidase activity;GO:0008144//drug binding;GO:0031404//chloride ion binding;GO:0005515//protein binding;GO:0008238//exopeptidase activity;GO:0008240//tripeptidyl-peptidase activity;GO:0008270//zinc ion binding;GO:0016787//hydrolase activity;GO:0004180//carboxypeptidase activity;GO:0004175//endopeptidase activity;GO:0008241…	K01283//Renin secretion;Hypertrophic cardiomyopathy (HCM);Chagas disease (American trypanosomiasis);Renin-angiotensin system
Acsl5	ENSMUSG00000024981		0.339833	3.62e-08	2.49e-07		0.270996	9.26e-07	1.42e-05		GO:0016020//membrane;GO:0005634//nucleus;GO:0005743//mitochondrial inner membrane;GO:0005783//endoplasmic reticulum;GO:0005789//endoplasmic reticulum membrane;GO:0016021//integral component of membrane;GO:0005739//mitochondrion;GO:0005730//nucleolus;GO:0005741//mitochondrial outer membrane	GO:0006629//lipid metabolic process;GO:2001236//regulation of extrinsic apoptotic signaling pathway;GO:0001676//long-chain fatty acid metabolic process;GO:0006631//fatty acid metabolic process;GO:0008152//metabolic process	GO:0016874//ligase activity;GO:0005524//ATP binding;GO:0004467//long-chain fatty acid-CoA ligase activity;GO:0003824//catalytic activity;GO:0102391//decanoate--CoA ligase activity;GO:0000166//nucleotide binding	K01897//Fatty acid metabolism;PPAR signaling pathway;Peroxisome;Fatty acid biosynthesis;Fatty acid degradation;Metabolic pathways;Adipocytokine signaling pathway
Adamts9	ENSMUSG00000030022		0.395684	0.00014164	0.000595278		0.467257	2.95e-10	9.05e-09		GO:0005578//proteinaceous extracellular matrix;GO:0005615//extracellular space;GO:0009986//cell surface	GO:0045636//positive regulation of melanocyte differentiation;GO:1903671//negative regulation of sprouting angiogenesis;GO:0035909//aorta morphogenesis;GO:0010596//negative regulation of endothelial cell migration;GO:0003229//ventricular cardiac muscle tissue development;GO:0090673//endothelial cell-matrix adhesion;GO:0003179//heart valve morphogenesis;GO:0048070//regulation of developmental pigm…	GO:0008237//metallopeptidase activity;GO:0046872//metal ion binding;GO:0004222//metalloendopeptidase activity;GO:0004175//endopeptidase activity;GO:0008270//zinc ion binding	-
Adcy8	ENSMUSG00000022376		1.79926	0.000318039	0.00125965		1.16553	0.000113099	0.0009614		GO:0005886//plasma membrane;GO:0016020//membrane;GO:0016021//integral component of membrane;GO:0008074//guanylate cyclase complex, soluble	GO:0006171//cAMP biosynthetic process;GO:0006182//cGMP biosynthetic process;GO:0007165//signal transduction;GO:0009190//cyclic nucleotide biosynthetic process;GO:0035556//intracellular signal transduction;GO:0007616//long-term memory	GO:0005524//ATP binding;GO:0000166//nucleotide binding;GO:0016849//phosphorus-oxygen lyase activity;GO:0004383//guanylate cyclase activity;GO:0004016//adenylate cyclase activity;GO:0046872//metal ion binding;GO:0016829//lyase activity	K08048//Regulation of lipolysis in adipocytes;Platelet activation;Estrogen signaling pathway;Adrenergic signaling in cardiomyocytes;Circadian entrainment;cAMP signaling pathway;Salivary secretion;Retrograde endocannabinoid signaling;Oxytocin signaling pathway;Long-term potentiation;Purine metabolism;Chemokine signaling pathway;Calcium signaling pathway;Pathways in cancer;Progesterone-mediated ooc…
Adgrg2	ENSMUSG00000031298		2.49941	1.55e-103	1.65e-101		0.390646	2.4e-07	4.17e-06		GO:0005886//plasma membrane;GO:0005829//cytosol;GO:0016020//membrane;GO:0009986//cell surface;GO:0016021//integral component of membrane;GO:0070062//extracellular exosome;GO:0016324//apical plasma membrane	GO:0007186//G-protein coupled receptor signaling pathway;GO:0007166//cell surface receptor signaling pathway;GO:0007165//signal transduction	GO:0004930//G-protein coupled receptor activity;GO:0004888//transmembrane signaling receptor activity;GO:0004871//signal transducer activity	-
Adora2b	ENSMUSG00000018500		1.46147	2.97e-75	2.17e-73		0.425318	1.7e-11	6.26e-10		GO:0005886//plasma membrane;GO:0016020//membrane;GO:0016021//integral component of membrane;GO:0005622//intracellular	GO:0031284//positive regulation of guanylate cyclase activity;GO:0001973//adenosine receptor signaling pathway;GO:0031668//cellular response to extracellular stimulus;GO:0060087//relaxation of vascular smooth muscle;GO:0010575//positive regulation of vascular endothelial growth factor production;GO:0032755//positive regulation of interleukin-6 production;GO:0030828//positive regulation of cGMP bi…	GO:0004871//signal transducer activity;GO:0004930//G-protein coupled receptor activity;GO:0001609//G-protein coupled adenosine receptor activity	K04267//Rap1 signaling pathway;Calcium signaling pathway;Neuroactive ligand-receptor interaction;Vascular smooth muscle contraction;Alcoholism
Aen	ENSMUSG00000030609		0.263151	0.000676804	0.00250774		0.63277	2.24e-21	2.23e-19		GO:0005730//nucleolus;GO:0031965//nuclear membrane;GO:0005654//nucleoplasm;GO:0005634//nucleus	GO:0006974//cellular response to DNA damage stimulus;GO:0090305//nucleic acid phosphodiester bond hydrolysis;GO:0042771//intrinsic apoptotic signaling pathway in response to DNA damage by p53 class mediator;GO:0006915//apoptotic process;GO:0010212//response to ionizing radiation	GO:0016787//hydrolase activity;GO:0004518//nuclease activity;GO:0003676//nucleic acid binding;GO:0004527//exonuclease activity	-
Ahcyl1	ENSMUSG00000027893		0.32382	2.69e-11	2.49e-10		0.157987	0.0018178	0.0101248		GO:0016020//membrane;GO:0005886//plasma membrane;GO:0005829//cytosol;GO:0043231//intracellular membrane-bounded organelle;GO:0005737//cytoplasm;GO:0005783//endoplasmic reticulum;GO:0016324//apical plasma membrane;GO:0070062//extracellular exosome	GO:0006378//mRNA polyadenylation;GO:0051592//response to calcium ion;GO:0010765//positive regulation of sodium ion transport;GO:0006611//protein export from nucleus;GO:0042045//epithelial fluid transport;GO:0032412//regulation of ion transmembrane transporter activity;GO:0031440//regulation of mRNA 3'-end processing;GO:0033353//S-adenosylmethionine cycle;GO:0006730//one-carbon metabolic process;G…	GO:0042802//identical protein binding;GO:0005515//protein binding;GO:0004013//adenosylhomocysteinase activity;GO:0003723//RNA binding	K01251//Cysteine and methionine metabolism;Metabolic pathways
AI837181	ENSMUSG00000047423		0.383483	1.79e-08	1.26e-07		0.156745	0.00644477	0.0285894		-	-	GO:0003723//RNA binding	-
Aig1	ENSMUSG00000019806		0.457159	0.000642191	0.00238807		0.490194	1.64e-05	0.00018163		GO:0016020//membrane;GO:0016021//integral component of membrane;GO:0012505//endomembrane system	GO:0042758//long-chain fatty acid catabolic process	GO:0016787//hydrolase activity	-
Ak6	ENSMUSG00000078941		0.423372	0.000746396	0.00274354		0.339594	0.00203457	0.011085		GO:0033276//transcription factor TFTC complex;GO:0005654//nucleoplasm;GO:0030914//STAGA complex;GO:0071339//MLL1 complex;GO:0016020//membrane;GO:0005634//nucleus;GO:0005829//cytosol;GO:0000124//SAGA complex;GO:0005669//transcription factor TFIID complex;GO:0000125//PCAF complex;GO:0015030//Cajal body;GO:0005737//cytoplasm;GO:0070761//pre-snoRNP complex	GO:0006355//regulation of transcription, DNA-templated;GO:0015937//coenzyme A biosynthetic process;GO:0051123//RNA polymerase II transcriptional preinitiation complex assembly;GO:0000492//box C/D snoRNP assembly;GO:0045944//positive regulation of transcription from RNA polymerase II promoter;GO:0030307//positive regulation of cell growth;GO:0050821//protein stabilization;GO:0032435//negative regu…	GO:0016301//kinase activity;GO:0051117//ATPase binding;GO:0016740//transferase activity;GO:0005524//ATP binding;GO:0003677//DNA binding;GO:0044212//transcription regulatory region DNA binding;GO:0003713//transcription coactivator activity;GO:0002039//p53 binding;GO:0070742//C2H2 zinc finger domain binding;GO:0000166//nucleotide binding;GO:0001075//transcription factor activity, RNA polymerase II …	K14535//Basal transcription factors;K18532//Metabolic pathways;Ribosome biogenesis in eukaryotes;Biosynthesis of antibiotics;Purine metabolism;Biosynthesis of secondary metabolites
Akr1b8	ENSMUSG00000029762		0.3586	2.61e-10	2.22e-09		0.186988	0.000264648	0.00199481		GO:0070062//extracellular exosome;GO:0005737//cytoplasm	GO:0055114//oxidation-reduction process;GO:0044598//doxorubicin metabolic process;GO:0016488//farnesol catabolic process;GO:0044597//daunorubicin metabolic process	GO:0045550//geranylgeranyl reductase activity;GO:0016491//oxidoreductase activity;GO:0001758//retinal dehydrogenase activity;GO:0047718//indanol dehydrogenase activity;GO:0004032//alditol:NADP+ 1-oxidoreductase activity	K00011//Galactose metabolism;Metabolic pathways;Pentose and glucuronate interconversions;Fructose and mannose metabolism;Glycerolipid metabolism
Akr1c18	ENSMUSG00000021214		0.55226	0.00222073	0.00738006		1.08998	3.73e-15	2.17e-13		GO:0005622//intracellular;GO:0070062//extracellular exosome;GO:0005737//cytoplasm;GO:0005829//cytosol;GO:0005634//nucleus	GO:0061370//testosterone biosynthetic process;GO:2000224//regulation of testosterone biosynthetic process;GO:1990646//cellular response to prolactin;GO:0044598//doxorubicin metabolic process;GO:0008284//positive regulation of cell proliferation;GO:0010942//positive regulation of cell death;GO:0071372//cellular response to follicle-stimulating hormone stimulus;GO:0048385//regulation of retinoic ac…	GO:0047006//17-alpha,20-alpha-dihydroxypregn-4-en-3-one dehydrogenase activity;GO:0004033//aldo-keto reductase (NADP) activity;GO:0045550//geranylgeranyl reductase activity;GO:0035410//dihydrotestosterone 17-beta-dehydrogenase activity;GO:0004032//alditol:NADP+ 1-oxidoreductase activity;GO:0018636//phenanthrene 9,10-monooxygenase activity;GO:0047086//ketosteroid monooxygenase activity;GO:0016655/…	K05295//Steroid hormone biosynthesis
Alcam	ENSMUSG00000022636		0.82959	1.3e-05	6.46e-05		1.39151	2.78e-23	3.32e-21		GO:0005886//plasma membrane;GO:0031226//intrinsic component of plasma membrane;GO:0016020//membrane;GO:0042101//T cell receptor complex;GO:0042995//cell projection;GO:0016021//integral component of membrane;GO:0030425//dendrite;GO:0001772//immunological synapse;GO:0070062//extracellular exosome;GO:0043025//neuronal cell body;GO:0005887//integral component of plasma membrane;GO:0005925//focal adhe…	GO:0007155//cell adhesion;GO:0002376//immune system process;GO:0008045//motor neuron axon guidance;GO:0007411//axon guidance;GO:1990138//neuron projection extension;GO:0007157//heterophilic cell-cell adhesion via plasma membrane cell adhesion molecules;GO:0002250//adaptive immune response;GO:0031290//retinal ganglion cell axon guidance;GO:0048846//axon extension involved in axon guidance	GO:0042802//identical protein binding;GO:0005515//protein binding	K06547//Cell adhesion molecules (CAMs)
Alpl	ENSMUSG00000028766		0.485888	1.08e-09	8.68e-09		0.621405	4.12e-19	3.5e-17		GO:0070062//extracellular exosome;GO:0065010//extracellular membrane-bounded organelle;GO:0005886//plasma membrane;GO:0031225//anchored component of membrane;GO:0016020//membrane;GO:0005615//extracellular space;GO:0005578//proteinaceous extracellular matrix	GO:0003006//developmental process involved in reproduction;GO:0071407//cellular response to organic cyclic compound;GO:0051384//response to glucocorticoid;GO:0001649//osteoblast differentiation;GO:0046677//response to antibiotic;GO:0016311//dephosphorylation;GO:0033280//response to vitamin D;GO:0071529//cementum mineralization;GO:0008152//metabolic process;GO:0001958//endochondral ossification;GO…	GO:0046872//metal ion binding;GO:0016787//hydrolase activity;GO:0016462//pyrophosphatase activity;GO:0005515//protein binding;GO:0003824//catalytic activity;GO:0016791//phosphatase activity;GO:0004035//alkaline phosphatase activity	K01077//Aminobenzoate degradation;Two-component system;Microbial metabolism in diverse environments;Metabolic pathways;Folate biosynthesis
Amotl1	ENSMUSG00000013076		0.570722	4.1e-28	9.3e-27		0.370632	1.44e-14	7.81e-13		GO:0030054//cell junction;GO:0031410//cytoplasmic vesicle;GO:0008180//COP9 signalosome;GO:0030027//lamellipodium;GO:0016324//apical plasma membrane;GO:0005923//bicellular tight junction	GO:0035329//hippo signaling;GO:0043536//positive regulation of blood vessel endothelial cell migration;GO:0003365//establishment of cell polarity involved in ameboidal cell migration;GO:0016055//Wnt signaling pathway	GO:0042802//identical protein binding;GO:0005515//protein binding	K06104//Tight junction
Ampd2	ENSMUSG00000027889		0.260708	0.000382781	0.00149019		0.256269	0.000250389	0.00189968		-	GO:0046034//ATP metabolic process;GO:0042632//cholesterol homeostasis;GO:0046033//AMP metabolic process;GO:0052652//cyclic purine nucleotide metabolic process;GO:0097009//energy homeostasis;GO:0009117//nucleotide metabolic process;GO:0009168//purine ribonucleoside monophosphate biosynthetic process;GO:0032264//IMP salvage;GO:0006188//IMP biosynthetic process;GO:0046039//GTP metabolic process;GO:0…	GO:0003876//AMP deaminase activity;GO:0019239//deaminase activity;GO:0046872//metal ion binding;GO:0016787//hydrolase activity	K01490//Metabolic pathways;Biosynthesis of antibiotics;Biosynthesis of secondary metabolites;Purine metabolism
Ampd3	ENSMUSG00000005686		2.66543	2.17e-183	4.75e-181		0.66598	1.13e-28	2.14e-26		-	GO:0046031//ADP metabolic process;GO:0046039//GTP metabolic process;GO:0006188//IMP biosynthetic process;GO:0032264//IMP salvage;GO:0097009//energy homeostasis;GO:0046033//AMP metabolic process;GO:0046034//ATP metabolic process;GO:0009117//nucleotide metabolic process;GO:0009168//purine ribonucleoside monophosphate biosynthetic process;GO:0034101//erythrocyte homeostasis	GO:0046872//metal ion binding;GO:0016787//hydrolase activity;GO:0003876//AMP deaminase activity;GO:0019239//deaminase activity	K01490//Biosynthesis of antibiotics;Biosynthesis of secondary metabolites;Purine metabolism;Metabolic pathways
Angptl7	ENSMUSG00000028989		1.37914	3.14e-65	1.87e-63		0.325404	2.86e-08	6.03e-07		GO:0005576//extracellular region	-	-	-
Ankrd1	ENSMUSG00000024803		0.740768	6.77e-33	1.81e-31		0.28035	2.04e-09	5.38e-08		GO:0031674//I band;GO:0005667//transcription factor complex;GO:0005829//cytosol;GO:0001650//fibrillar center;GO:0005634//nucleus;GO:0005737//cytoplasm;GO:0030016//myofibril	GO:0050714//positive regulation of protein secretion;GO:0043065//positive regulation of apoptotic process;GO:0006357//regulation of transcription from RNA polymerase II promoter;GO:0071456//cellular response to hypoxia;GO:0071356//cellular response to tumor necrosis factor;GO:0071260//cellular response to mechanical stimulus;GO:0071347//cellular response to interleukin-1;GO:0035690//cellular resp…	GO:0061629//RNA polymerase II sequence-specific DNA binding transcription factor binding;GO:0070412//R-SMAD binding;GO:0042826//histone deacetylase binding;GO:0001085//RNA polymerase II transcription factor binding;GO:0001105//RNA polymerase II transcription coactivator activity;GO:0008134//transcription factor binding;GO:0002039//p53 binding;GO:0031432//titin binding;GO:0003677//DNA binding;GO:0…	-
Antxr2	ENSMUSG00000029338		0.14588	0.00288726	0.00930668		0.177538	0.000244704	0.00186351		GO:0016021//integral component of membrane;GO:0009986//cell surface;GO:0016020//membrane;GO:0009897//external side of plasma membrane	GO:1901998//toxin transport;GO:0022414//reproductive process	GO:0046872//metal ion binding;GO:0004872//receptor activity	-
Anxa5	ENSMUSG00000027712		0.771769	5e-39	1.62e-37		0.143227	0.00319372	0.0161035		GO:0016020//membrane;GO:0009897//external side of plasma membrane;GO:0005925//focal adhesion;GO:0072563//endothelial microparticle;GO:0070062//extracellular exosome;GO:0005622//intracellular	GO:0010033//response to organic substance;GO:0007599//hemostasis;GO:0007596//blood coagulation;GO:0050819//negative regulation of coagulation	GO:0005544//calcium-dependent phospholipid binding;GO:0005509//calcium ion binding;GO:0005515//protein binding	-
Aox3	ENSMUSG00000064294		6.986	2.2e-63	1.25e-61		0.511055	5.19e-10	1.53e-08		GO:0016020//membrane;GO:0005829//cytosol;GO:0005737//cytoplasm;GO:0016021//integral component of membrane	GO:0009115//xanthine catabolic process;GO:0017144//drug metabolic process;GO:0055114//oxidation-reduction process;GO:0022900//electron transport chain	GO:0051287//NAD binding;GO:0051536//iron-sulfur cluster binding;GO:0050660//flavin adenine dinucleotide binding;GO:0009055//electron carrier activity;GO:0004031//aldehyde oxidase activity;GO:0004854//xanthine dehydrogenase activity;GO:0005506//iron ion binding;GO:0042803//protein homodimerization activity;GO:0050250//retinal oxidase activity;GO:0043546//molybdopterin cofactor binding;GO:0051537//…	K00157//Tryptophan metabolism;Retinol metabolism;Jak-STAT signaling pathway;Tyrosine metabolism;Valine, leucine and isoleucine degradation;Drug metabolism - cytochrome P450;Vitamin B6 metabolism;Microbial metabolism in diverse environments;Metabolic pathways;Nicotinate and nicotinamide metabolism
Ap1s1	ENSMUSG00000004849		0.289676	0.000137743	0.000581381		0.161844	0.00261312	0.0136772		GO:0043195//terminal bouton;GO:0030117//membrane coat;GO:0030659//cytoplasmic vesicle membrane;GO:0005829//cytosol;GO:0030121//AP-1 adaptor complex;GO:0016020//membrane;GO:0031410//cytoplasmic vesicle;GO:0070062//extracellular exosome;GO:0005794//Golgi apparatus;GO:0043231//intracellular membrane-bounded organelle;GO:0005905//clathrin-coated pit;GO:0005802//trans-Golgi network	GO:0006886//intracellular protein transport;GO:0015031//protein transport;GO:0009615//response to virus;GO:0042147//retrograde transport, endosome to Golgi;GO:0016192//vesicle-mediated transport;GO:0006810//transport	GO:0008565//protein transporter activity;GO:0005515//protein binding	K12394//Lysosome
Ap3s1	ENSMUSG00000024480		0.235052	0.000374535	0.00145992		0.222452	1.23e-05	0.000139828		GO:0005794//Golgi apparatus;GO:0031410//cytoplasmic vesicle;GO:0005802//trans-Golgi network;GO:0043231//intracellular membrane-bounded organelle;GO:0030123//AP-3 adaptor complex;GO:0016020//membrane;GO:0030659//cytoplasmic vesicle membrane;GO:1904115//axon cytoplasm;GO:0030117//membrane coat	GO:0008089//anterograde axonal transport;GO:0048490//anterograde synaptic vesicle transport;GO:0006810//transport;GO:0016192//vesicle-mediated transport;GO:0015031//protein transport;GO:0006886//intracellular protein transport	GO:0008565//protein transporter activity	K12399//Lysosome
Apobec1	ENSMUSG00000040613		1.63559	1.36e-73	9.5e-72		0.672699	6.41e-27	1.1e-24		GO:0005634//nucleus;GO:0005737//cytoplasm	GO:0042158//lipoprotein biosynthetic process;GO:0042953//lipoprotein transport;GO:0006397//mRNA processing;GO:0090209//negative regulation of triglyceride metabolic process;GO:0042127//regulation of cell proliferation;GO:0042157//lipoprotein metabolic process;GO:0048255//mRNA stabilization;GO:0080111//DNA demethylation;GO:0010332//response to gamma radiation;GO:0032869//cellular response to insul…	GO:0046872//metal ion binding;GO:0004126//cytidine deaminase activity;GO:0016814//hydrolase activity, acting on carbon-nitrogen (but not peptide) bonds, in cyclic amidines;GO:0019904//protein domain specific binding;GO:0004131//cytosine deaminase activity;GO:0016787//hydrolase activity;GO:0043021//ribonucleoprotein complex binding;GO:0005515//protein binding;GO:0008047//enzyme activator activity;…	-
Apol9b	ENSMUSG00000068246		0.232581	0.00455664	0.0139843		0.189564	0.00444978	0.0211619		GO:0005576//extracellular region	GO:0006869//lipid transport;GO:0042157//lipoprotein metabolic process	GO:0008289//lipid binding	-
Aprt	ENSMUSG00000006589		0.350795	4.87e-07	2.96e-06		0.236667	2.53e-05	0.000265311		GO:0070062//extracellular exosome;GO:0005654//nucleoplasm;GO:0005737//cytoplasm;GO:0005829//cytosol	GO:0032869//cellular response to insulin stimulus;GO:0046083//adenine metabolic process;GO:0044209//AMP salvage;GO:0006166//purine ribonucleoside salvage;GO:0007595//lactation;GO:0009116//nucleoside metabolic process;GO:0006168//adenine salvage;GO:0007625//grooming behavior	GO:0003999//adenine phosphoribosyltransferase activity;GO:0016208//AMP binding;GO:0016740//transferase activity;GO:0016757//transferase activity, transferring glycosyl groups;GO:0002055//adenine binding	K00759//Metabolic pathways;Purine metabolism
Arg2	ENSMUSG00000021125		3.77879	5.29e-10	4.38e-09		2.1117	2.52e-24	3.29e-22		GO:0005739//mitochondrion	GO:0071650//negative regulation of chemokine (C-C motif) ligand 5 production;GO:0000050//urea cycle;GO:0006941//striated muscle contraction;GO:0002250//adaptive immune response;GO:0032720//negative regulation of tumor necrosis factor production;GO:0002829//negative regulation of type 2 immune response;GO:0071641//negative regulation of macrophage inflammatory protein 1 alpha production;GO:0006525…	GO:0016813//hydrolase activity, acting on carbon-nitrogen (but not peptide) bonds, in linear amidines;GO:0016787//hydrolase activity;GO:0046872//metal ion binding;GO:0004053//arginase activity	K01476//Biosynthesis of amino acids;Arginine biosynthesis;Metabolic pathways;Arginine and proline metabolism;Biosynthesis of secondary metabolites;Biosynthesis of antibiotics;Amoebiasis
Arhgap17	ENSMUSG00000030766		0.390722	1.25e-06	7.25e-06		0.237215	0.00255502	0.0134294		GO:0005886//plasma membrane;GO:0030054//cell junction;GO:0005829//cytosol;GO:0005634//nucleus;GO:0016020//membrane;GO:0005737//cytoplasm;GO:0005923//bicellular tight junction	GO:0007165//signal transduction;GO:0043547//positive regulation of GTPase activity;GO:0017156//calcium ion regulated exocytosis;GO:0007015//actin filament organization	GO:0017124//SH3 domain binding;GO:0005096//GTPase activator activity	-
Arhgap26	ENSMUSG00000036452		1.14189	1.78e-20	2.9e-19		0.702912	3.61e-13	1.67e-11		GO:0005856//cytoskeleton;GO:0005737//cytoplasm;GO:0030054//cell junction;GO:0005925//focal adhesion	GO:0030036//actin cytoskeleton organization;GO:0043547//positive regulation of GTPase activity;GO:0007165//signal transduction;GO:0051056//regulation of small GTPase mediated signal transduction	GO:0005096//GTPase activator activity;GO:0005515//protein binding;GO:0005543//phospholipid binding	-
Arhgdib	ENSMUSG00000030220		0.913486	3.79e-08	2.6e-07		0.425806	0.00145749	0.00844232		GO:0005737//cytoplasm;GO:0016020//membrane;GO:0005829//cytosol;GO:0070062//extracellular exosome	GO:0071461//cellular response to redox state;GO:1901164//negative regulation of trophoblast cell migration;GO:0035023//regulation of Rho protein signal transduction;GO:0050790//regulation of catalytic activity;GO:2000249//regulation of actin cytoskeleton reorganization;GO:0043547//positive regulation of GTPase activity	GO:0005096//GTPase activator activity;GO:0048365//Rac GTPase binding;GO:0003924//GTPase activity;GO:0005094//Rho GDP-dissociation inhibitor activity	K12462//Vasopressin-regulated water reabsorption;Neurotrophin signaling pathway
Arhgef37	ENSMUSG00000045094		4.10647	2.39e-50	1.03e-48		0.849346	1.07e-14	5.88e-13		GO:0005737//cytoplasm	GO:0065009//regulation of molecular function;GO:0035023//regulation of Rho protein signal transduction	GO:0005089//Rho guanyl-nucleotide exchange factor activity	-
Arntl	ENSMUSG00000055116		1.2738	3.44e-80	2.66e-78		0.159056	0.00439755	0.0209564		GO:0016604//nuclear body;GO:0005829//cytosol;GO:0005634//nucleus;GO:0005667//transcription factor complex;GO:0005654//nucleoplasm;GO:0043231//intracellular membrane-bounded organelle;GO:0005737//cytoplasm;GO:0033391//chromatoid body;GO:0016605//PML body	GO:0042753//positive regulation of circadian rhythm;GO:0045893//positive regulation of transcription, DNA-templated;GO:0045892//negative regulation of transcription, DNA-templated;GO:1901985//positive regulation of protein acetylation;GO:0051726//regulation of cell cycle;GO:2000323//negative regulation of glucocorticoid receptor signaling pathway;GO:0032007//negative regulation of TOR signaling;G…	GO:0008134//transcription factor binding;GO:0001046//core promoter sequence-specific DNA binding;GO:0001190//transcriptional activator activity, RNA polymerase II transcription factor binding;GO:0043565//sequence-specific DNA binding;GO:0005515//protein binding;GO:0001077//transcriptional activator activity, RNA polymerase II core promoter proximal region sequence-specific binding;GO:0043425//bHL…	K02296//Circadian rhythm - fly;Herpes simplex infection;Dopaminergic synapse;Circadian rhythm
Arrdc3	ENSMUSG00000074794		1.31872	5.18e-67	3.19e-65		0.170459	0.0081622	0.0344838		GO:0005769//early endosome;GO:0005764//lysosome;GO:0005886//plasma membrane;GO:0005768//endosome;GO:0016020//membrane;GO:0005737//cytoplasm	GO:0060613//fat pad development;GO:0031651//negative regulation of heat generation;GO:0090327//negative regulation of locomotion involved in locomotory behavior;GO:0043588//skin development;GO:0044252//negative regulation of multicellular organismal metabolic process;GO:0051443//positive regulation of ubiquitin-protein transferase activity;GO:0071879//positive regulation of adrenergic receptor si…	GO:0031699//beta-3 adrenergic receptor binding	-
Atg12	ENSMUSG00000032905		0.305902	4.34e-10	3.63e-09		0.2819	2.46e-09	6.35e-08		GO:0016020//membrane;GO:0034274//Atg12-Atg5-Atg16 complex;GO:0005829//cytosol;GO:0005776//autophagosome;GO:0034045//pre-autophagosomal structure membrane;GO:0005737//cytoplasm;GO:0043234//protein complex	GO:0006914//autophagy;GO:0044804//autophagy of nucleus;GO:0045087//innate immune response;GO:0000422//autophagy of mitochondrion;GO:0002376//immune system process;GO:0006501//C-terminal protein lipidation;GO:0000045//autophagosome assembly	GO:0019776//Atg8 ligase activity;GO:0005515//protein binding	K08336//Regulation of autophagy;RIG-I-like receptor signaling pathway;FoxO signaling pathway
Atg7	ENSMUSG00000030314		0.586032	1.28e-17	1.84e-16		0.163939	0.00584258	0.02635		GO:0030424//axon;GO:0005930//axoneme;GO:0005737//cytoplasm;GO:0005829//cytosol;GO:0000407//pre-autophagosomal structure	GO:0043066//negative regulation of apoptotic process;GO:0060548//negative regulation of cell death;GO:0006810//transport;GO:0051607//defense response to virus;GO:0050877//nervous system process;GO:0032436//positive regulation of proteasomal ubiquitin-dependent protein catabolic process;GO:0021680//cerebellar Purkinje cell layer development;GO:0001889//liver development;GO:0031667//response to nut…	GO:0005515//protein binding;GO:0008641//small protein activating enzyme activity;GO:0008134//transcription factor binding;GO:0042803//protein homodimerization activity;GO:0019779//Atg8 activating enzyme activity;GO:0019778//Atg12 activating enzyme activity	K08337//Regulation of autophagy
Atic	ENSMUSG00000026192		0.557071	2.12e-25	4.31e-24		0.146746	0.00410374	0.0197535		GO:0005739//mitochondrion;GO:0070062//extracellular exosome;GO:0016020//membrane	GO:0021549//cerebellum development;GO:0021987//cerebral cortex development;GO:0008152//metabolic process;GO:0046452//dihydrofolate metabolic process;GO:0003360//brainstem development;GO:0009116//nucleoside metabolic process;GO:0010035//response to inorganic substance;GO:0031100//animal organ regeneration;GO:0046654//tetrahydrofolate biosynthetic process;GO:0009259//ribonucleotide metabolic proces…	GO:0003824//catalytic activity;GO:0016740//transferase activity;GO:0003937//IMP cyclohydrolase activity;GO:0045296//cadherin binding;GO:0042803//protein homodimerization activity;GO:0016787//hydrolase activity;GO:0004643//phosphoribosylaminoimidazolecarboxamide formyltransferase activity	K00602//Biosynthesis of secondary metabolites;Purine metabolism;One carbon pool by folate;Biosynthesis of antibiotics;Metabolic pathways
Atp6v0a1	ENSMUSG00000019302		0.196803	0.0100937	0.0282919		0.292362	1.06e-05	0.000123004		GO:0016020//membrane;GO:0016471//vacuolar proton-transporting V-type ATPase complex;GO:0005886//plasma membrane;GO:0005829//cytosol;GO:0030659//cytoplasmic vesicle membrane;GO:0005794//Golgi apparatus;GO:0070062//extracellular exosome;GO:0016607//nuclear speck;GO:0031410//cytoplasmic vesicle;GO:0042470//melanosome;GO:0033179//proton-transporting V-type ATPase, V0 domain;GO:0005737//cytoplasm;GO:0…	GO:0006810//transport;GO:0070072//vacuolar proton-transporting V-type ATPase complex assembly;GO:0015986//ATP synthesis coupled proton transport;GO:0015992//proton transport;GO:1901998//toxin transport;GO:0016241//regulation of macroautophagy;GO:0007035//vacuolar acidification;GO:0006811//ion transport;GO:0015991//ATP hydrolysis coupled proton transport	GO:0005515//protein binding;GO:0015078//hydrogen ion transmembrane transporter activity;GO:0051117//ATPase binding;GO:0046961//proton-transporting ATPase activity, rotational mechanism	K02154//Collecting duct acid secretion;Metabolic pathways;Phagosome;Epithelial cell signaling in Helicobacter pylori infection;Rheumatoid arthritis;Vibrio cholerae infection;Synaptic vesicle cycle;Lysosome;Oxidative phosphorylation;Tuberculosis
Atp7a	ENSMUSG00000033792		0.193171	0.00364286	0.0114393		0.336433	1.96e-11	7.15e-10		GO:0005802//trans-Golgi network;GO:0048471//perinuclear region of cytoplasm;GO:0031410//cytoplasmic vesicle;GO:0016020//membrane;GO:0031526//brush border membrane;GO:0005634//nucleus;GO:0005783//endoplasmic reticulum;GO:0045121//membrane raft;GO:0043204//perikaryon;GO:0016021//integral component of membrane;GO:0030141//secretory granule;GO:0030140//trans-Golgi network transport vesicle;GO:0016324…	GO:0010592//positive regulation of lamellipodium assembly;GO:0043588//skin development;GO:0030001//metal ion transport;GO:0001974//blood vessel remodeling;GO:0071236//cellular response to antibiotic;GO:0021860//pyramidal neuron development;GO:0010042//response to manganese ion;GO:0034760//negative regulation of iron ion transmembrane transport;GO:0030199//collagen fibril organization;GO:0001889//…	GO:0004008//copper-exporting ATPase activity;GO:0005515//protein binding;GO:0005524//ATP binding;GO:0005507//copper ion binding;GO:1903136//cuprous ion binding;GO:0016532//superoxide dismutase copper chaperone activity;GO:0016787//hydrolase activity;GO:0051087//chaperone binding;GO:0032767//copper-dependent protein binding;GO:0000166//nucleotide binding;GO:0048365//Rac GTPase binding;GO:0046872//…	-
Auts2	ENSMUSG00000029673		1.4912	5.2e-10	4.32e-09		0.486394	0.00885564	0.0368478		GO:0015629//actin cytoskeleton;GO:0005634//nucleus;GO:0042995//cell projection;GO:0030426//growth cone;GO:0005737//cytoplasm;GO:0005856//cytoskeleton	GO:0045944//positive regulation of transcription from RNA polymerase II promoter;GO:0001764//neuron migration;GO:0051571//positive regulation of histone H3-K4 methylation;GO:0097484//dendrite extension;GO:0060013//righting reflex;GO:0006355//regulation of transcription, DNA-templated;GO:0006351//transcription, DNA-templated;GO:0098582//innate vocalization behavior;GO:0035022//positive regulation …	GO:0003682//chromatin binding;GO:0005515//protein binding	-
Aven	ENSMUSG00000003604		0.295933	0.000894591	0.00323988		0.299461	0.000214835	0.00166973		GO:0005622//intracellular;GO:0012505//endomembrane system;GO:0016020//membrane	GO:0043066//negative regulation of apoptotic process;GO:0006915//apoptotic process	-	-
Azin1	ENSMUSG00000037458		0.279519	5.56e-07	3.36e-06		0.648772	2.86e-35	7.86e-33		GO:0005634//nucleus;GO:0005737//cytoplasm	GO:0006596//polyamine biosynthetic process;GO:1902269//positive regulation of polyamine transmembrane transport;GO:0042177//negative regulation of protein catabolic process;GO:0043085//positive regulation of catalytic activity;GO:0033387//putrescine biosynthetic process from ornithine;GO:0006595//polyamine metabolic process	GO:0003824//catalytic activity;GO:0042978//ornithine decarboxylase activator activity	-
B4galt1	ENSMUSG00000028413		0.481353	5.48e-23	1.02e-21		0.147646	0.00118131	0.00710096		GO:0042995//cell projection;GO:0016021//integral component of membrane;GO:0030057//desmosome;GO:0005794//Golgi apparatus;GO:0032580//Golgi cisterna membrane;GO:0070062//extracellular exosome;GO:0009897//external side of plasma membrane;GO:0005886//plasma membrane;GO:0005576//extracellular region;GO:0016323//basolateral plasma membrane;GO:0005615//extracellular space;GO:0009986//cell surface;GO:00…	GO:0002064//epithelial cell development;GO:0007339//binding of sperm to zona pellucida;GO:0006487//protein N-linked glycosylation;GO:0007341//penetration of zona pellucida;GO:0051270//regulation of cellular component movement;GO:0009101//glycoprotein biosynthetic process;GO:0002526//acute inflammatory response;GO:0009312//oligosaccharide biosynthetic process;GO:0042060//wound healing;GO:0043065//…	GO:0008378//galactosyltransferase activity;GO:0016757//transferase activity, transferring glycosyl groups;GO:0046872//metal ion binding;GO:0003945//N-acetyllactosamine synthase activity;GO:0035250//UDP-galactosyltransferase activity;GO:0048487//beta-tubulin binding;GO:0008092//cytoskeletal protein binding;GO:0004461//lactose synthase activity;GO:0005515//protein binding;GO:0003831//beta-N-acetylg…	K07966//Glycosphingolipid biosynthesis - lacto and neolacto series;Galactose metabolism;Metabolic pathways;Glycosaminoglycan biosynthesis - keratan sulfate;Various types of N-glycan biosynthesis;Other types of O-glycan biosynthesis;N-Glycan biosynthesis
Bax	ENSMUSG00000003873		0.314567	0.000293967	0.00116966		0.250418	0.000570731	0.00384178		GO:0071944//cell periphery;GO:0031966//mitochondrial membrane;GO:0005634//nucleus;GO:0046930//pore complex;GO:0016020//membrane;GO:0005622//intracellular;GO:0005741//mitochondrial outer membrane;GO:0005635//nuclear envelope;GO:0097136//Bcl-2 family protein complex;GO:0005737//cytoplasm;GO:0005789//endoplasmic reticulum membrane;GO:0097144//BAX complex;GO:0005829//cytosol;GO:0070062//extracellular…	GO:1902445//regulation of mitochondrial membrane permeability involved in programmed necrotic cell death;GO:0048087//positive regulation of developmental pigmentation;GO:0032461//positive regulation of protein oligomerization;GO:1902512//positive regulation of apoptotic DNA fragmentation;GO:2001234//negative regulation of apoptotic signaling pathway;GO:0032976//release of matrix enzymes from mito…	GO:0015267//channel activity;GO:0046982//protein heterodimerization activity;GO:0008289//lipid binding;GO:0030544//Hsp70 protein binding;GO:0051434//BH3 domain binding;GO:0042802//identical protein binding;GO:0005515//protein binding;GO:0042803//protein homodimerization activity;GO:0051087//chaperone binding	K02159//Sphingolipid signaling pathway;p53 signaling pathway;Huntington's disease;Colorectal cancer;Apoptosis;Hepatitis B;Pathways in cancer;Prion diseases;Non-alcoholic fatty liver disease (NAFLD);Amyotrophic lateral sclerosis (ALS);Protein processing in endoplasmic reticulum;HTLV-I infection;Viral carcinogenesis;Tuberculosis;Neurotrophin signaling pathway
Bbs12	ENSMUSG00000051444		0.759811	2.81e-12	2.8e-11		0.256526	0.00627696	0.0279673		GO:0042995//cell projection;GO:0005832//chaperonin-containing T-complex;GO:0005929//cilium	GO:0061077//chaperone-mediated protein folding;GO:0042073//intraciliary transport;GO:0006458//'de novo' protein folding;GO:0051131//chaperone-mediated protein complex assembly;GO:0045494//photoreceptor cell maintenance;GO:0042755//eating behavior;GO:0045599//negative regulation of fat cell differentiation	GO:0051082//unfolded protein binding;GO:0044183//protein binding involved in protein folding;GO:0005524//ATP binding	-
BC005561	ENSMUSG00000079065		0.522728	1.75e-06	9.92e-06		1.34721	1.45e-14	7.87e-13		GO:0000445//THO complex part of transcription export complex	GO:0006406//mRNA export from nucleus	GO:0003729//mRNA binding	-
Bcar1	ENSMUSG00000031955		0.171508	0.00367906	0.0115279		0.423725	1.82e-15	1.09e-13		GO:0030027//lamellipodium;GO:0001726//ruffle;GO:0005886//plasma membrane;GO:0005829//cytosol;GO:0015629//actin cytoskeleton;GO:0005925//focal adhesion;GO:0005737//cytoplasm;GO:0030054//cell junction	GO:0050853//B cell receptor signaling pathway;GO:0035729//cellular response to hepatocyte growth factor stimulus;GO:0007155//cell adhesion;GO:0007015//actin filament organization;GO:0016477//cell migration;GO:0048008//platelet-derived growth factor receptor signaling pathway;GO:0060326//cell chemotaxis;GO:0007229//integrin-mediated signaling pathway;GO:0007173//epidermal growth factor receptor si…	GO:0019901//protein kinase binding;GO:0005515//protein binding;GO:0017124//SH3 domain binding;GO:0004871//signal transducer activity	K05726//Leukocyte transendothelial migration;Focal adhesion;Rap1 signaling pathway;Regulation of actin cytoskeleton;Chemokine signaling pathway;Bacterial invasion of epithelial cells
Bcl2	ENSMUSG00000057329		0.716005	6.45e-18	9.41e-17		0.190776	0.00368647	0.0180608		GO:0016020//membrane;GO:0046930//pore complex;GO:0005634//nucleus;GO:0031966//mitochondrial membrane;GO:0005737//cytoplasm;GO:0005789//endoplasmic reticulum membrane;GO:0043209//myelin sheath;GO:0005741//mitochondrial outer membrane;GO:0031965//nuclear membrane;GO:0005622//intracellular;GO:0005829//cytosol;GO:0005654//nucleoplasm;GO:0043234//protein complex;GO:0016021//integral component of membr…	GO:2001234//negative regulation of apoptotic signaling pathway;GO:0050853//B cell receptor signaling pathway;GO:0046902//regulation of mitochondrial membrane permeability;GO:0007569//cell aging;GO:0048087//positive regulation of developmental pigmentation;GO:0009791//post-embryonic development;GO:0048066//developmental pigmentation;GO:0006582//melanin metabolic process;GO:0040007//growth;GO:00513…	GO:0043565//sequence-specific DNA binding;GO:0042803//protein homodimerization activity;GO:0008134//transcription factor binding;GO:0051434//BH3 domain binding;GO:0042802//identical protein binding;GO:0005515//protein binding;GO:0051721//protein phosphatase 2A binding;GO:0031625//ubiquitin protein ligase binding;GO:0046982//protein heterodimerization activity;GO:0019903//protein phosphatase bindi…	K02161//Prostate cancer;Small cell lung cancer;MicroRNAs in cancer;Apoptosis;Pathways in cancer;Cholinergic synapse;Protein processing in endoplasmic reticulum;Epstein-Barr virus infection;Jak-STAT signaling pathway;Focal adhesion;Toxoplasmosis;Sphingolipid signaling pathway;Adrenergic signaling in cardiomyocytes;Colorectal cancer;HIF-1 signaling pathway;PI3K-Akt signaling pathway;Hepatitis B;NF-…
Bcl2l1	ENSMUSG00000007659		1.49724	1.22e-151	2.14e-149		0.65783	1.04e-36	3.01e-34		GO:0005815//microtubule organizing center;GO:0005829//cytosol;GO:0005739//mitochondrion;GO:0005783//endoplasmic reticulum;GO:0005759//mitochondrial matrix;GO:0016021//integral component of membrane;GO:0005813//centrosome;GO:0045202//synapse;GO:0031966//mitochondrial membrane;GO:0016020//membrane;GO:0005634//nucleus;GO:0005856//cytoskeleton;GO:0005741//mitochondrial outer membrane;GO:0031965//nucl…	GO:0071480//cellular response to gamma radiation;GO:0060154//cellular process regulating host cell cycle in response to virus;GO:0043065//positive regulation of apoptotic process;GO:0040007//growth;GO:0042981//regulation of apoptotic process;GO:0070584//mitochondrion morphogenesis;GO:1902042//negative regulation of extrinsic apoptotic signaling pathway via death domain receptors;GO:0051402//neuro…	GO:0019901//protein kinase binding;GO:0042803//protein homodimerization activity;GO:0046982//protein heterodimerization activity;GO:0051434//BH3 domain binding;GO:0042802//identical protein binding;GO:0005515//protein binding	K04570//Transcriptional misregulation in cancer;Ras signaling pathway;Jak-STAT signaling pathway;Toxoplasmosis;Amyotrophic lateral sclerosis (ALS);HTLV-I infection;Chronic myeloid leukemia;Pathways in cancer;NF-kappa B signaling pathway;Pancreatic cancer;Small cell lung cancer;Apoptosis;PI3K-Akt signaling pathway
BE692007	ENSMUSG00000099757		0.877946	0.000476787	0.00182146		0.721745	3.21e-06	4.22e-05		-	-	-	-
Bgn	ENSMUSG00000031375		0.65413	4.63e-30	1.12e-28		0.232933	0.000222255	0.001717		GO:0030133//transport vesicle;GO:0005576//extracellular region;GO:0070062//extracellular exosome;GO:0005622//intracellular;GO:0009986//cell surface;GO:0031012//extracellular matrix;GO:0005615//extracellular space;GO:0005737//cytoplasm;GO:0005578//proteinaceous extracellular matrix;GO:0042383//sarcolemma	GO:0001974//blood vessel remodeling;GO:0046426//negative regulation of JAK-STAT cascade;GO:0006469//negative regulation of protein kinase activity;GO:0019221//cytokine-mediated signaling pathway;GO:0019800//peptide cross-linking via chondroitin 4-sulfate glycosaminoglycan	GO:0050840//extracellular matrix binding;GO:0005539//glycosaminoglycan binding;GO:0004860//protein kinase inhibitor activity	-
Bid	ENSMUSG00000004446		0.428931	6.58e-08	4.4e-07		0.378434	3.75e-08	7.74e-07		GO:0031966//mitochondrial membrane;GO:0032592//integral component of mitochondrial membrane;GO:0005739//mitochondrion;GO:0070062//extracellular exosome;GO:0005737//cytoplasm;GO:0016020//membrane;GO:0005829//cytosol	GO:0010918//positive regulation of mitochondrial membrane potential;GO:0097284//hepatocyte apoptotic process;GO:0006915//apoptotic process;GO:0032461//positive regulation of protein oligomerization;GO:0042127//regulation of cell proliferation;GO:0097345//mitochondrial outer membrane permeabilization;GO:0042770//signal transduction in response to DNA damage;GO:0090150//establishment of protein loc…	GO:0046982//protein heterodimerization activity;GO:0031625//ubiquitin protein ligase binding;GO:0005515//protein binding	K04726//Tuberculosis;Amyotrophic lateral sclerosis (ALS);Alzheimer's disease;Non-alcoholic fatty liver disease (NAFLD);Natural killer cell mediated cytotoxicity;Pathways in cancer;Apoptosis;Viral myocarditis;Sphingolipid signaling pathway;p53 signaling pathway
Brcc3	ENSMUSG00000031201		0.921943	1.81e-57	9.16e-56		0.175564	0.0014875	0.0085924		GO:0000151//ubiquitin ligase complex;GO:0000152//nuclear ubiquitin ligase complex;GO:0070531//BRCA1-A complex;GO:0005737//cytoplasm;GO:0070552//BRISC complex;GO:0005634//nucleus;GO:0005856//cytoskeleton;GO:0000922//spindle pole;GO:0005654//nucleoplasm	GO:0050790//regulation of catalytic activity;GO:0006281//DNA repair;GO:0006974//cellular response to DNA damage stimulus;GO:0070536//protein K63-linked deubiquitination;GO:0051301//cell division;GO:0006302//double-strand break repair;GO:0010212//response to ionizing radiation;GO:0016569//covalent chromatin modification;GO:0010165//response to X-ray;GO:0006508//proteolysis;GO:0007049//cell cycle;G…	GO:0036459//thiol-dependent ubiquitinyl hydrolase activity;GO:0031593//polyubiquitin modification-dependent protein binding;GO:0004843//thiol-dependent ubiquitin-specific protease activity;GO:0008233//peptidase activity;GO:0046872//metal ion binding;GO:0030234//enzyme regulator activity;GO:0005515//protein binding;GO:0016787//hydrolase activity;GO:0008237//metallopeptidase activity	-
Btg3	ENSMUSG00000022863		0.204369	0.010177	0.0285032		0.204331	0.0036617	0.0179704		GO:0005737//cytoplasm	GO:0045930//negative regulation of mitotic cell cycle	GO:0005515//protein binding	K14443//RNA degradation
C1galt1	ENSMUSG00000042460		0.193142	0.00431216	0.0133		0.414227	4.63e-14	2.38e-12		GO:0016021//integral component of membrane;GO:0016020//membrane	GO:0001822//kidney development;GO:0030154//cell differentiation;GO:0007275//multicellular organism development;GO:0006493//protein O-linked glycosylation;GO:0006486//protein glycosylation;GO:0060576//intestinal epithelial cell development;GO:0016267//O-glycan processing, core 1;GO:0016266//O-glycan processing;GO:0001525//angiogenesis	GO:0016740//transferase activity;GO:0016757//transferase activity, transferring glycosyl groups;GO:0008378//galactosyltransferase activity;GO:0016263//glycoprotein-N-acetylgalactosamine 3-beta-galactosyltransferase activity;GO:0046872//metal ion binding	K00731//Metabolic pathways;Mucin type O-Glycan biosynthesis
C3ar1	ENSMUSG00000040552		2.34686	0.0018806	0.00634415		1.33675	0.00111072	0.00676192		GO:0005887//integral component of plasma membrane;GO:0005623//cell;GO:0016020//membrane;GO:0005886//plasma membrane;GO:0016021//integral component of membrane	GO:0002430//complement receptor mediated signaling pathway;GO:0090023//positive regulation of neutrophil chemotaxis;GO:0006935//chemotaxis;GO:0006954//inflammatory response;GO:0010575//positive regulation of vascular endothelial growth factor production;GO:0007204//positive regulation of cytosolic calcium ion concentration;GO:0045766//positive regulation of angiogenesis;GO:0010759//positive regul…	GO:0004871//signal transducer activity;GO:0004875//complement receptor activity;GO:0004930//G-protein coupled receptor activity;GO:0004876//complement component C3a receptor activity	K04009//Complement and coagulation cascades;Staphylococcus aureus infection;Neuroactive ligand-receptor interaction
Camk1d	ENSMUSG00000039145		0.859328	1.43e-28	3.29e-27		0.253286	4.47e-05	0.000437397		GO:0005634//nucleus;GO:0005737//cytoplasm	GO:0016310//phosphorylation;GO:0050766//positive regulation of phagocytosis;GO:0060267//positive regulation of respiratory burst;GO:0043066//negative regulation of apoptotic process;GO:0043065//positive regulation of apoptotic process;GO:0006954//inflammatory response;GO:0071622//regulation of granulocyte chemotaxis;GO:0018105//peptidyl-serine phosphorylation;GO:0035556//intracellular signal tran…	GO:0004683//calmodulin-dependent protein kinase activity;GO:0016301//kinase activity;GO:0004672//protein kinase activity;GO:0000166//nucleotide binding;GO:0004674//protein serine/threonine kinase activity;GO:0016740//transferase activity;GO:0005516//calmodulin binding;GO:0005524//ATP binding;GO:0003824//catalytic activity	K08794//Aldosterone synthesis and secretion;Oxytocin signaling pathway
Camkk2	ENSMUSG00000029471		0.591755	1.35e-10	1.19e-09		0.632615	5.19e-21	4.99e-19		GO:0005622//intracellular;GO:0042995//cell projection;GO:0005829//cytosol;GO:0005634//nucleus;GO:0005737//cytoplasm	GO:0018107//peptidyl-threonine phosphorylation;GO:0046777//protein autophosphorylation;GO:0006468//protein phosphorylation;GO:0001934//positive regulation of protein phosphorylation;GO:0016310//phosphorylation;GO:0018105//peptidyl-serine phosphorylation;GO:0045860//positive regulation of protein kinase activity;GO:0035556//intracellular signal transduction;GO:0061762//CAMKK-AMPK signaling cascade	GO:0005524//ATP binding;GO:0005515//protein binding;GO:0005516//calmodulin binding;GO:0016740//transferase activity;GO:0005509//calcium ion binding;GO:0004674//protein serine/threonine kinase activity;GO:0000166//nucleotide binding;GO:0004672//protein kinase activity;GO:0004683//calmodulin-dependent protein kinase activity;GO:0016301//kinase activity	K07359//AMPK signaling pathway;Adipocytokine signaling pathway;Oxytocin signaling pathway;Alcoholism
Card6	ENSMUSG00000041849		0.340621	0.0154953	0.0411128		0.444717	0.000409111	0.0028817		GO:0005737//cytoplasm	GO:0043122//regulation of I-kappaB kinase/NF-kappaB signaling;GO:0042981//regulation of apoptotic process	-	K12797//NOD-like receptor signaling pathway
Casp4	ENSMUSG00000033538		1.03327	6.92e-09	5.09e-08		0.556983	3.09e-05	0.000315324		GO:0043025//neuronal cell body;GO:0005739//mitochondrion;GO:0005783//endoplasmic reticulum;GO:0097169//AIM2 inflammasome complex;GO:0043234//protein complex;GO:0005789//endoplasmic reticulum membrane;GO:0005737//cytoplasm;GO:0072557//IPAF inflammasome complex;GO:0005886//plasma membrane;GO:0005829//cytosol;GO:0016020//membrane;GO:0072559//NLRP3 inflammasome complex;GO:0005576//extracellular regio…	GO:0007015//actin filament organization;GO:0002376//immune system process;GO:0035234//ectopic germ cell programmed cell death;GO:0070269//pyroptosis;GO:0050718//positive regulation of interleukin-1 beta secretion;GO:0042981//regulation of apoptotic process;GO:0006954//inflammatory response;GO:0045087//innate immune response;GO:0097193//intrinsic apoptotic signaling pathway;GO:1903265//positive re…	GO:0008234//cysteine-type peptidase activity;GO:0016787//hydrolase activity;GO:0097110//scaffold protein binding;GO:0050700//CARD domain binding;GO:0097153//cysteine-type endopeptidase activity involved in apoptotic process;GO:0004197//cysteine-type endopeptidase activity;GO:0008233//peptidase activity	-
Cbx5	ENSMUSG00000009575		0.238874	1.66e-05	8.14e-05		0.152654	0.0013722	0.0080459		GO:0035097//histone methyltransferase complex;GO:0016605//PML body;GO:1990904//ribonucleoprotein complex;GO:0005720//nuclear heterochromatin;GO:0032991//macromolecular complex;GO:0000118//histone deacetylase complex;GO:0005634//nucleus;GO:0010369//chromocenter;GO:0005694//chromosome;GO:0005730//nucleolus;GO:0005721//pericentric heterochromatin;GO:0000775//chromosome, centromeric region;GO:0000776…	GO:0045892//negative regulation of transcription, DNA-templated;GO:0000122//negative regulation of transcription from RNA polymerase II promoter	GO:0042826//histone deacetylase binding;GO:0035064//methylated histone binding;GO:0030674//protein binding, bridging;GO:0070491//repressing transcription factor binding;GO:0003682//chromatin binding;GO:0042802//identical protein binding;GO:0005515//protein binding;GO:0044877//macromolecular complex binding;GO:0042803//protein homodimerization activity;GO:0043021//ribonucleoprotein complex binding	-
Ccbe1	ENSMUSG00000046318		0.532934	1.06e-15	1.36e-14		0.138465	0.0101996	0.0413487		GO:0005578//proteinaceous extracellular matrix;GO:0005615//extracellular space;GO:0005576//extracellular region;GO:0005581//collagen trimer	GO:0007585//respiratory gaseous exchange;GO:1900748//positive regulation of vascular endothelial growth factor signaling pathway;GO:0007275//multicellular organism development;GO:0045766//positive regulation of angiogenesis;GO:1901492//positive regulation of lymphangiogenesis;GO:0010595//positive regulation of endothelial cell migration;GO:0002040//sprouting angiogenesis;GO:0003016//respiratory s…	GO:0005509//calcium ion binding;GO:0005518//collagen binding;GO:0002020//protease binding	-
Ccl2	ENSMUSG00000035385		0.299187	0.00117119	0.00413312		1.64504	9.68e-101	2.62e-97		GO:0048471//perinuclear region of cytoplasm;GO:0030425//dendrite;GO:0005615//extracellular space;GO:0043204//perikaryon;GO:0005737//cytoplasm;GO:0044299//C-fiber;GO:0030139//endocytic vesicle;GO:0005791//rough endoplasmic reticulum;GO:0043025//neuronal cell body;GO:0043679//axon terminus;GO:0005576//extracellular region;GO:0045202//synapse	GO:0071402//cellular response to lipoprotein particle stimulus;GO:0032570//response to progesterone;GO:0071318//cellular response to ATP;GO:0033552//response to vitamin B3;GO:0022409//positive regulation of cell-cell adhesion;GO:0071300//cellular response to retinoic acid;GO:0032869//cellular response to insulin stimulus;GO:0007179//transforming growth factor beta receptor signaling pathway;GO:00…	GO:0001664//G-protein coupled receptor binding;GO:0005515//protein binding;GO:0005125//cytokine activity;GO:0031727//CCR2 chemokine receptor binding;GO:0008201//heparin binding;GO:0008009//chemokine activity	K14624//Influenza A;Chemokine signaling pathway;Herpes simplex infection;TNF signaling pathway;Malaria;Cytokine-cytokine receptor interaction;Rheumatoid arthritis;Chagas disease (American trypanosomiasis);NOD-like receptor signaling pathway
Ccl9	ENSMUSG00000019122		1.3119	1.81e-08	1.28e-07		0.943085	4.55e-10	1.35e-08		GO:0005576//extracellular region;GO:0005615//extracellular space	GO:0060326//cell chemotaxis;GO:0006935//chemotaxis;GO:0045662//negative regulation of myoblast differentiation;GO:0007186//G-protein coupled receptor signaling pathway;GO:0002548//monocyte chemotaxis;GO:0006955//immune response;GO:0070374//positive regulation of ERK1 and ERK2 cascade;GO:0048247//lymphocyte chemotaxis;GO:0030593//neutrophil chemotaxis;GO:0071347//cellular response to interleukin-1…	GO:0005125//cytokine activity;GO:0048020//CCR chemokine receptor binding;GO:0008009//chemokine activity	K05510//Chemokine signaling pathway
Ccnb1	ENSMUSG00000041431		0.689428	0.00814348	0.023404		0.406333	0.0123434	0.0481982		GO:0005815//microtubule organizing center;GO:0016020//membrane;GO:0005829//cytosol;GO:0005634//nucleus;GO:0005856//cytoskeleton;GO:0000922//spindle pole;GO:0097125//cyclin B1-CDK1 complex;GO:0000942//condensed nuclear chromosome outer kinetochore;GO:0005813//centrosome;GO:0005759//mitochondrial matrix;GO:0005737//cytoplasm	GO:0006468//protein phosphorylation;GO:0071283//cellular response to iron(III) ion;GO:0071398//cellular response to fatty acid;GO:2000775//histone H3-S10 phosphorylation involved in chromosome condensation;GO:0033129//positive regulation of histone phosphorylation;GO:0001933//negative regulation of protein phosphorylation;GO:0045787//positive regulation of cell cycle;GO:0071407//cellular response…	GO:0019901//protein kinase binding;GO:0016301//kinase activity;GO:0061575//cyclin-dependent protein serine/threonine kinase activator activity;GO:0005113//patched binding;GO:0044389//ubiquitin-like protein ligase binding;GO:0035173//histone kinase activity;GO:0005515//protein binding	K05868//Cell cycle;FoxO signaling pathway;Progesterone-mediated oocyte maturation;p53 signaling pathway
Ccnb2	ENSMUSG00000032218		0.907923	3.64e-08	2.5e-07		0.320867	0.000626116	0.00414416		GO:0015630//microtubule cytoskeleton;GO:0016020//membrane;GO:0005829//cytosol;GO:0005634//nucleus;GO:0005813//centrosome	GO:0051301//cell division;GO:0048538//thymus development;GO:0001701//in utero embryonic development;GO:0040007//growth;GO:0007049//cell cycle;GO:0043029//T cell homeostasis	GO:0045296//cadherin binding	K05868//Cell cycle;FoxO signaling pathway;Progesterone-mediated oocyte maturation;p53 signaling pathway
Ccnd1	ENSMUSG00000070348		1.419	2.64e-53	1.23e-51		0.606907	2.92e-34	7.64e-32		GO:0005654//nucleoplasm;GO:0005829//cytosol;GO:0000307//cyclin-dependent protein kinase holoenzyme complex;GO:0005634//nucleus;GO:0016020//membrane;GO:0017053//transcriptional repressor complex;GO:0005622//intracellular;GO:0005923//bicellular tight junction;GO:0005737//cytoplasm	GO:0001889//liver development;GO:0071310//cellular response to organic substance;GO:2000045//regulation of G1/S transition of mitotic cell cycle;GO:0010039//response to iron ion;GO:0014070//response to organic cyclic compound;GO:0051592//response to calcium ion;GO:0045737//positive regulation of cyclin-dependent protein serine/threonine kinase activity;GO:0008284//positive regulation of cell prol…	GO:0004693//cyclin-dependent protein serine/threonine kinase activity;GO:0008134//transcription factor binding;GO:0019899//enzyme binding;GO:0003714//transcription corepressor activity;GO:0005515//protein binding;GO:0019901//protein kinase binding;GO:0032403//protein complex binding;GO:0016301//kinase activity;GO:0004672//protein kinase activity;GO:0070064//proline-rich region binding;GO:0042826/…	K04503//Oxytocin signaling pathway;Hippo signaling pathway;Prolactin signaling pathway;Bladder cancer;FoxO signaling pathway;Viral myocarditis;Thyroid cancer;Thyroid hormone signaling pathway;Chronic myeloid leukemia;Melanoma;Acute myeloid leukemia;AMPK signaling pathway;Focal adhesion;Small cell lung cancer;MicroRNAs in cancer;Prostate cancer;Pancreatic cancer;Cell cycle;Pathways in cancer;HTLV-…
Cd14	ENSMUSG00000051439		1.25789	7.69e-31	1.92e-29		0.459273	5.02e-08	1.01e-06		GO:0009986//cell surface;GO:0005615//extracellular space;GO:0045121//membrane raft;GO:0046696//lipopolysaccharide receptor complex;GO:0009897//external side of plasma membrane;GO:0070062//extracellular exosome;GO:0005794//Golgi apparatus;GO:0031362//anchored component of external side of plasma membrane;GO:0005886//plasma membrane;GO:0031225//anchored component of membrane;GO:0016020//membrane;GO…	GO:0051602//response to electrical stimulus;GO:0034612//response to tumor necrosis factor;GO:2000484//positive regulation of interleukin-8 secretion;GO:0032496//response to lipopolysaccharide;GO:0071222//cellular response to lipopolysaccharide;GO:0034142//toll-like receptor 4 signaling pathway;GO:0006898//receptor-mediated endocytosis;GO:0031663//lipopolysaccharide-mediated signaling pathway;GO:0…	GO:0071723//lipopeptide binding;GO:0070891//lipoteichoic acid binding;GO:0001530//lipopolysaccharide binding	K04391//Phagosome;Pertussis;Salmonella infection;NF-kappa B signaling pathway;Hematopoietic cell lineage;Regulation of actin cytoskeleton;Legionellosis;Amoebiasis;Toll-like receptor signaling pathway;MAPK signaling pathway;Pathogenic Escherichia coli infection;Transcriptional misregulation in cancer;Tuberculosis
Cd38	ENSMUSG00000029084		3.72744	7.02e-12	6.77e-11		1.85747	5.27e-22	5.6e-20		GO:0070062//extracellular exosome;GO:0016020//membrane;GO:0005886//plasma membrane;GO:0005634//nucleus;GO:0043231//intracellular membrane-bounded organelle;GO:0016021//integral component of membrane;GO:0009986//cell surface	GO:0009725//response to hormone;GO:0033194//response to hydroperoxide;GO:0043066//negative regulation of apoptotic process;GO:0060292//long term synaptic depression;GO:0032526//response to retinoic acid;GO:0001666//response to hypoxia;GO:0032355//response to estradiol;GO:0042493//response to drug;GO:0070555//response to interleukin-1;GO:0045779//negative regulation of bone resorption;GO:0032024//…	GO:0050135//NAD(P)+ nucleosidase activity;GO:0016787//hydrolase activity;GO:0061809//NAD+ nucleotidase, cyclic ADP-ribose generating;GO:0042802//identical protein binding;GO:0016849//phosphorus-oxygen lyase activity;GO:0016740//transferase activity;GO:0003953//NAD+ nucleosidase activity;GO:0016798//hydrolase activity, acting on glycosyl bonds	K01242//Oxytocin signaling pathway;Nicotinate and nicotinamide metabolism;Calcium signaling pathway;Pancreatic secretion;Metabolic pathways;Salivary secretion;Epstein-Barr virus infection
Cdca7	ENSMUSG00000055612		0.545539	8.82e-07	5.2e-06		0.483705	1.44e-09	3.86e-08		GO:0005654//nucleoplasm;GO:0005634//nucleus;GO:0005829//cytosol;GO:0005737//cytoplasm	GO:0006351//transcription, DNA-templated;GO:0006915//apoptotic process;GO:0042127//regulation of cell proliferation;GO:0006355//regulation of transcription, DNA-templated	-	-
Cdh13	ENSMUSG00000031841		0.340874	3.61e-11	3.31e-10		0.212258	9.06e-06	0.000106643		GO:0070062//extracellular exosome;GO:0009897//external side of plasma membrane;GO:0005925//focal adhesion;GO:0005737//cytoplasm;GO:0031012//extracellular matrix;GO:0005901//caveola;GO:0048471//perinuclear region of cytoplasm;GO:0005615//extracellular space;GO:0005576//extracellular region;GO:0043005//neuron projection;GO:0016020//membrane;GO:0031225//anchored component of membrane;GO:0005886//pla…	GO:0010033//response to organic substance;GO:0045944//positive regulation of transcription from RNA polymerase II promoter;GO:0016601//Rac protein signal transduction;GO:0007155//cell adhesion;GO:0050850//positive regulation of calcium-mediated signaling;GO:0008285//negative regulation of cell proliferation;GO:0001938//positive regulation of endothelial cell proliferation;GO:0043616//keratinocyte…	GO:0071813//lipoprotein particle binding;GO:0005515//protein binding;GO:0055100//adiponectin binding;GO:0005509//calcium ion binding;GO:0045296//cadherin binding;GO:0042803//protein homodimerization activity;GO:0030169//low-density lipoprotein particle binding;GO:0046872//metal ion binding	-
Cdkn2aipnl	ENSMUSG00000020392		0.730339	1.53e-15	1.93e-14		0.233637	0.000583855	0.0039142		GO:0005654//nucleoplasm;GO:0005730//nucleolus	GO:0007165//signal transduction	-	-
Cdt1	ENSMUSG00000006585		0.499878	8.58e-06	4.41e-05		0.519225	4.29e-08	8.78e-07		GO:0000775//chromosome, centromeric region;GO:0005694//chromosome;GO:0005634//nucleus;GO:0000776//kinetochore;GO:0005737//cytoplasm;GO:0000777//condensed chromosome kinetochore;GO:0016604//nuclear body	GO:0051276//chromosome organization;GO:1902595//regulation of DNA replication origin binding;GO:2001178//positive regulation of mediator complex assembly;GO:0071163//DNA replication preinitiation complex assembly;GO:0033262//regulation of nuclear cell cycle DNA replication;GO:0007059//chromosome segregation;GO:0051315//attachment of mitotic spindle microtubules to kinetochore;GO:0072708//response…	GO:0005515//protein binding;GO:0003677//DNA binding;GO:0003682//chromatin binding	-
Cenpa	ENSMUSG00000029177		0.530862	0.00128198	0.00448393		0.265811	0.00760618	0.0326099		GO:0000776//kinetochore;GO:0000788//nuclear nucleosome;GO:0005634//nucleus;GO:0000786//nucleosome;GO:0000939//condensed chromosome inner kinetochore;GO:0000780//condensed nuclear chromosome, centromeric region;GO:0005694//chromosome;GO:0000777//condensed chromosome kinetochore;GO:0000778//condensed nuclear chromosome kinetochore;GO:0031618//nuclear pericentric heterochromatin;GO:0000775//chromoso…	GO:0000281//mitotic cytokinesis;GO:0051382//kinetochore assembly;GO:0006334//nucleosome assembly;GO:0000132//establishment of mitotic spindle orientation;GO:0071459//protein localization to chromosome, centromeric region	GO:0046982//protein heterodimerization activity;GO:0003677//DNA binding;GO:0031492//nucleosomal DNA binding	-
Chd9	ENSMUSG00000056608		0.231193	0.00828417	0.0237516		0.241042	0.000102771	0.000889909		GO:0005634//nucleus;GO:0005737//cytoplasm	GO:0006355//regulation of transcription, DNA-templated;GO:0016569//covalent chromatin modification;GO:0006351//transcription, DNA-templated	GO:0005524//ATP binding;GO:0003677//DNA binding;GO:0000166//nucleotide binding;GO:0016817//hydrolase activity, acting on acid anhydrides;GO:0004386//helicase activity;GO:0016787//hydrolase activity	-
Chka	ENSMUSG00000024843		0.614959	2.55e-07	1.61e-06		0.36823	1.25e-07	2.31e-06		GO:0005737//cytoplasm	GO:0006629//lipid metabolic process;GO:0006657//CDP-choline pathway;GO:0008654//phospholipid biosynthetic process;GO:0006656//phosphatidylcholine biosynthetic process;GO:0006646//phosphatidylethanolamine biosynthetic process;GO:1904681//response to 3-methylcholanthrene;GO:0019695//choline metabolic process;GO:0009636//response to toxic substance;GO:0016310//phosphorylation;GO:0006580//ethanolamin…	GO:0016301//kinase activity;GO:0004104//cholinesterase activity;GO:0000166//nucleotide binding;GO:0033265//choline binding;GO:0008144//drug binding;GO:0042803//protein homodimerization activity;GO:0004305//ethanolamine kinase activity;GO:0016740//transferase activity;GO:0005524//ATP binding;GO:0004103//choline kinase activity	K14156//Metabolic pathways;Choline metabolism in cancer;Glycerophospholipid metabolism
Ciapin1	ENSMUSG00000031781		0.61505	2.38e-13	2.6e-12		0.164067	0.0105069	0.0423193		GO:0005737//cytoplasm;GO:0005758//mitochondrial intermembrane space;GO:0005634//nucleus;GO:0005730//nucleolus;GO:0005654//nucleoplasm;GO:0005739//mitochondrion	GO:0006915//apoptotic process;GO:0016226//iron-sulfur cluster assembly;GO:0043066//negative regulation of apoptotic process;GO:0032259//methylation;GO:0022900//electron transport chain;GO:0008152//metabolic process;GO:0030097//hemopoiesis	GO:0051536//iron-sulfur cluster binding;GO:0009055//electron carrier activity;GO:0005515//protein binding;GO:0008168//methyltransferase activity;GO:0046872//metal ion binding;GO:0051537//2 iron, 2 sulfur cluster binding	-
Cldn15	ENSMUSG00000001739		2.60332	2.74e-28	6.25e-27		0.499385	0.000457926	0.00318547		GO:0016328//lateral plasma membrane;GO:0005923//bicellular tight junction;GO:0005886//plasma membrane;GO:0030054//cell junction;GO:0016020//membrane;GO:0016021//integral component of membrane	GO:0006811//ion transport;GO:0016338//calcium-independent cell-cell adhesion via plasma membrane cell-adhesion molecules;GO:0006810//transport	GO:0005198//structural molecule activity;GO:0042802//identical protein binding	K06087//Hepatitis C;Cell adhesion molecules (CAMs);Leukocyte transendothelial migration;Tight junction
Clec1a	ENSMUSG00000033082		2.69394	1.01e-76	7.59e-75		1.04786	4.87e-38	1.55e-35		GO:0016021//integral component of membrane;GO:0016020//membrane	-	GO:0030246//carbohydrate binding	-
Cmklr1	ENSMUSG00000042190		0.567576	0.00233318	0.00771942		0.871889	6.91e-09	1.64e-07		GO:0005886//plasma membrane;GO:0016020//membrane;GO:0016021//integral component of membrane	GO:0007186//G-protein coupled receptor signaling pathway;GO:0010759//positive regulation of macrophage chemotaxis;GO:0032695//negative regulation of interleukin-12 production;GO:0007165//signal transduction;GO:0045600//positive regulation of fat cell differentiation;GO:0050848//regulation of calcium-mediated signaling;GO:0032088//negative regulation of NF-kappaB transcription factor activity;GO:0…	GO:0004871//signal transducer activity;GO:0004930//G-protein coupled receptor activity	-
Cmtm3	ENSMUSG00000031875		0.160183	0.0167743	0.0440423		0.155924	0.00173457	0.00975834		GO:0005615//extracellular space;GO:0016021//integral component of membrane;GO:0005737//cytoplasm;GO:0016020//membrane;GO:0031965//nuclear membrane	GO:0050861//positive regulation of B cell receptor signaling pathway;GO:0010469//regulation of receptor activity;GO:0006935//chemotaxis	GO:0005515//protein binding;GO:0005125//cytokine activity	-
Cmtr2	ENSMUSG00000046441		0.222729	0.00926988	0.0262546		0.278859	8.94e-05	0.000793665		GO:0005737//cytoplasm;GO:0005634//nucleus	GO:0006397//mRNA processing;GO:0006370//7-methylguanosine mRNA capping;GO:0032259//methylation;GO:0097310//cap2 mRNA methylation	GO:0016740//transferase activity;GO:0004483//mRNA (nucleoside-2'-O-)-methyltransferase activity;GO:0008168//methyltransferase activity	-
Col14a1	ENSMUSG00000022371		0.917765	5.87e-09	4.35e-08		0.453315	0.000188945	0.00149718		GO:0005578//proteinaceous extracellular matrix;GO:0005615//extracellular space;GO:0031012//extracellular matrix;GO:0005576//extracellular region;GO:0005581//collagen trimer;GO:0005614//interstitial matrix;GO:0070062//extracellular exosome	GO:0007155//cell adhesion;GO:0048873//homeostasis of number of cells within a tissue;GO:0003229//ventricular cardiac muscle tissue development;GO:0030199//collagen fibril organization;GO:0061050//regulation of cell growth involved in cardiac muscle cell development	GO:0003723//RNA binding	K08133//Protein digestion and absorption
Colgalt1	ENSMUSG00000034807		0.185351	0.000342585	0.00134531		0.149783	0.00176991	0.00992619		GO:0005783//endoplasmic reticulum;GO:0005788//endoplasmic reticulum lumen;GO:0016020//membrane	GO:1904028//positive regulation of collagen fibril organization	GO:0050211//procollagen galactosyltransferase activity;GO:0016757//transferase activity, transferring glycosyl groups;GO:0016740//transferase activity	K11703//Lysine degradation;Other types of O-glycan biosynthesis
Cp	ENSMUSG00000003617		1.23798	4.8e-106	5.28e-104		0.262676	1e-07	1.89e-06		GO:0016021//integral component of membrane;GO:0005615//extracellular space;GO:0005623//cell;GO:0070062//extracellular exosome;GO:0072562//blood microparticle;GO:0005765//lysosomal membrane;GO:0005576//extracellular region;GO:0016020//membrane	GO:0006825//copper ion transport;GO:0006810//transport;GO:0006811//ion transport;GO:0006879//cellular iron ion homeostasis;GO:0055114//oxidation-reduction process	GO:0005507//copper ion binding;GO:0004322//ferroxidase activity;GO:0016491//oxidoreductase activity;GO:0051087//chaperone binding;GO:0046872//metal ion binding	K13624//Porphyrin and chlorophyll metabolism
Cry1	ENSMUSG00000020038		0.483222	1.53e-10	1.33e-09		0.32427	5.91e-07	9.47e-06		GO:0005634//nucleus;GO:0005829//cytosol;GO:0005737//cytoplasm;GO:0005654//nucleoplasm;GO:0005739//mitochondrion	GO:2000850//negative regulation of glucocorticoid secretion;GO:0000122//negative regulation of transcription from RNA polymerase II promoter;GO:2000323//negative regulation of glucocorticoid receptor signaling pathway;GO:0006094//gluconeogenesis;GO:0045892//negative regulation of transcription, DNA-templated;GO:0031397//negative regulation of protein ubiquitination;GO:0048511//rhythmic process;GO…	GO:0005515//protein binding;GO:0000989//transcription factor activity, transcription factor binding;GO:0019902//phosphatase binding;GO:0019900//kinase binding;GO:0008134//transcription factor binding;GO:0001046//core promoter sequence-specific DNA binding;GO:0035257//nuclear hormone receptor binding;GO:0009881//photoreceptor activity;GO:0042826//histone deacetylase binding;GO:0003690//double-stra…	K02295//Circadian rhythm
Ctgf	ENSMUSG00000019997		1.88809	4.56e-74	3.23e-72		0.553784	6.22e-05	0.00057881		GO:0043231//intracellular membrane-bounded organelle;GO:0005578//proteinaceous extracellular matrix;GO:0005938//cell cortex;GO:0005615//extracellular space;GO:0048471//perinuclear region of cytoplasm;GO:0005794//Golgi apparatus;GO:0005576//extracellular region;GO:0005829//cytosol;GO:0005801//cis-Golgi network	GO:0070278//extracellular matrix constituent secretion;GO:0060452//positive regulation of cardiac muscle contraction;GO:0008543//fibroblast growth factor receptor signaling pathway;GO:0007155//cell adhesion;GO:0010629//negative regulation of gene expression;GO:0010628//positive regulation of gene expression;GO:0007229//integrin-mediated signaling pathway;GO:0051496//positive regulation of stress …	GO:0005178//integrin binding;GO:0008083//growth factor activity;GO:0001968//fibronectin binding;GO:0005520//insulin-like growth factor binding;GO:0008022//protein C-terminus binding;GO:0008201//heparin binding	K05719//Proteoglycans in cancer;Arrhythmogenic right ventricular cardiomyopathy (ARVC);Bacterial invasion of epithelial cells;Leishmaniasis;Cell adhesion molecules (CAMs);Pertussis;ECM-receptor interaction;PI3K-Akt signaling pathway;Phagosome;Leukocyte transendothelial migration;Hypertrophic cardiomyopathy (HCM);Platelet activation;Pathogenic Escherichia coli infection;Regulation of actin cytoske…
Ctla2a	ENSMUSG00000044258		3.54735	1.18e-95	1.17e-93		0.438243	3.37e-06	4.39e-05		GO:0030425//dendrite;GO:0005576//extracellular region	GO:0045589//regulation of regulatory T cell differentiation;GO:0010955//negative regulation of protein processing;GO:0050728//negative regulation of inflammatory response;GO:0006508//proteolysis	GO:0008234//cysteine-type peptidase activity	-
Ctnnal1	ENSMUSG00000038816		1.02949	8.48e-67	5.2e-65		0.261536	9.82e-07	1.49e-05		GO:0005622//intracellular;GO:0005737//cytoplasm;GO:0005856//cytoskeleton;GO:0016020//membrane;GO:0005829//cytosol;GO:0005886//plasma membrane	GO:0007266//Rho protein signal transduction;GO:0007155//cell adhesion	GO:0051015//actin filament binding;GO:0045296//cadherin binding	-
D930016D06Rik	ENSMUSG00000097392		0.822515	1.23e-08	8.79e-08		1.44012	1.94e-52	1.5e-49		-	-	-	-
Dap	ENSMUSG00000039168		0.430914	4.72e-09	3.55e-08		0.318978	9.31e-06	0.000109554		-	GO:0006919//activation of cysteine-type endopeptidase activity involved in apoptotic process;GO:0010507//negative regulation of autophagy;GO:0045892//negative regulation of transcription, DNA-templated;GO:0006914//autophagy;GO:0097190//apoptotic signaling pathway;GO:0034198//cellular response to amino acid starvation;GO:0032088//negative regulation of NF-kappaB transcription factor activity;GO:00…	GO:0070513//death domain binding	-
Dcbld2	ENSMUSG00000035107		1.16043	1.78e-63	1.02e-61		0.350653	1.77e-11	6.51e-10		GO:0009986//cell surface;GO:0016021//integral component of membrane;GO:0016020//membrane;GO:0005887//integral component of plasma membrane	GO:0030308//negative regulation of cell growth;GO:0042060//wound healing	-	-
Dctd	ENSMUSG00000031562		0.439587	3.19e-08	2.2e-07		0.334353	4.25e-07	6.99e-06		GO:0070062//extracellular exosome	GO:0006220//pyrimidine nucleotide metabolic process	GO:0046872//metal ion binding;GO:0004132//dCMP deaminase activity;GO:0016787//hydrolase activity;GO:0008270//zinc ion binding;GO:0003824//catalytic activity;GO:0042802//identical protein binding	K01493//Pyrimidine metabolism;Metabolic pathways
Ddx39	ENSMUSG00000005481		0.23225	0.00285387	0.0092071		0.33791	1.16e-08	2.66e-07		GO:0005737//cytoplasm;GO:0016020//membrane;GO:0005634//nucleus;GO:0005730//nucleolus;GO:0005681//spliceosomal complex;GO:0016607//nuclear speck	GO:0006397//mRNA processing;GO:0006974//cellular response to DNA damage stimulus;GO:0006406//mRNA export from nucleus;GO:0008380//RNA splicing;GO:0010468//regulation of gene expression;GO:0000398//mRNA splicing, via spliceosome;GO:0010501//RNA secondary structure unwinding	GO:0005524//ATP binding;GO:0004004//ATP-dependent RNA helicase activity;GO:0042802//identical protein binding;GO:0003723//RNA binding;GO:0016787//hydrolase activity;GO:0016887//ATPase activity;GO:0003676//nucleic acid binding;GO:0000166//nucleotide binding;GO:0004386//helicase activity	-
Ddx3x	ENSMUSG00000000787		0.240611	8.05e-06	4.16e-05		0.19644	4.91e-05	0.000472252		GO:0005852//eukaryotic translation initiation factor 3 complex;GO:0005829//cytosol;GO:0005634//nucleus;GO:0016020//membrane;GO:0010494//cytoplasmic stress granule;GO:0022627//cytosolic small ribosomal subunit;GO:0016607//nuclear speck;GO:0070062//extracellular exosome;GO:0005730//nucleolus;GO:0005741//mitochondrial outer membrane;GO:0005739//mitochondrion;GO:0036464//cytoplasmic ribonucleoprotein…	GO:0035556//intracellular signal transduction;GO:0030308//negative regulation of cell growth;GO:0008625//extrinsic apoptotic signaling pathway via death domain receptors;GO:1903608//protein localization to cytoplasmic stress granule;GO:0006915//apoptotic process;GO:0007059//chromosome segregation;GO:0010468//regulation of gene expression;GO:0045948//positive regulation of translational initiation…	GO:0005524//ATP binding;GO:0003677//DNA binding;GO:0048027//mRNA 5'-UTR binding;GO:0043539//protein serine/threonine kinase activator activity;GO:0031369//translation initiation factor binding;GO:0003723//RNA binding;GO:0003924//GTPase activity;GO:0045296//cadherin binding;GO:0016887//ATPase activity;GO:0008143//poly(A) binding;GO:0043024//ribosomal small subunit binding;GO:0043273//CTPase activi…	K11594//Viral carcinogenesis;Hepatitis B;RIG-I-like receptor signaling pathway
Ddx54	ENSMUSG00000029599		0.304436	1.4e-07	9.08e-07		0.180924	0.000779259	0.00501667		GO:0005730//nucleolus;GO:0005794//Golgi apparatus;GO:0016020//membrane;GO:0005634//nucleus;GO:0005737//cytoplasm	GO:1903507//negative regulation of nucleic acid-templated transcription;GO:0016070//RNA metabolic process;GO:0006355//regulation of transcription, DNA-templated;GO:0006396//RNA processing;GO:0010501//RNA secondary structure unwinding;GO:0006351//transcription, DNA-templated	GO:0030331//estrogen receptor binding;GO:0004386//helicase activity;GO:0000166//nucleotide binding;GO:0003676//nucleic acid binding;GO:0005102//receptor binding;GO:0016787//hydrolase activity;GO:0003723//RNA binding;GO:0003714//transcription corepressor activity;GO:0004004//ATP-dependent RNA helicase activity;GO:0005524//ATP binding	-
Dennd4c	ENSMUSG00000038024		0.266217	7.3e-08	4.86e-07		0.223121	1.79e-06	2.52e-05		GO:0005794//Golgi apparatus;GO:0031410//cytoplasmic vesicle;GO:0032593//insulin-responsive compartment;GO:0005737//cytoplasm;GO:0043231//intracellular membrane-bounded organelle;GO:0005829//cytosol;GO:0005886//plasma membrane;GO:0016020//membrane;GO:0030904//retromer complex;GO:0030659//cytoplasmic vesicle membrane	GO:0065009//regulation of molecular function;GO:0015031//protein transport;GO:0032869//cellular response to insulin stimulus;GO:0072659//protein localization to plasma membrane;GO:0006810//transport	GO:0017112//Rab guanyl-nucleotide exchange factor activity;GO:0005085//guanyl-nucleotide exchange factor activity	-
Dhcr7	ENSMUSG00000058454		0.484381	1.16e-06	6.76e-06		0.247702	0.00587114	0.0264568		GO:0016021//integral component of membrane;GO:0043231//intracellular membrane-bounded organelle;GO:0005789//endoplasmic reticulum membrane;GO:0005783//endoplasmic reticulum;GO:0005640//nuclear outer membrane;GO:0030176//integral component of endoplasmic reticulum membrane;GO:0005829//cytosol;GO:0016020//membrane	GO:0016126//sterol biosynthetic process;GO:0006695//cholesterol biosynthetic process;GO:0030154//cell differentiation;GO:0001568//blood vessel development;GO:0016132//brassinosteroid biosynthetic process;GO:0009791//post-embryonic development;GO:0045540//regulation of cholesterol biosynthetic process;GO:0006629//lipid metabolic process;GO:0030324//lung development;GO:0042127//regulation of cell p…	GO:0047598//7-dehydrocholesterol reductase activity;GO:0009918//sterol delta7 reductase activity;GO:0016628//oxidoreductase activity, acting on the CH-CH group of donors, NAD or NADP as acceptor;GO:0016491//oxidoreductase activity;GO:0050661//NADP binding	K00213//Metabolic pathways;Steroid biosynthesis;Biosynthesis of secondary metabolites
Dhrs9	ENSMUSG00000027068		0.403011	3.55e-10	2.99e-09		0.186141	0.000677094	0.00443815		GO:0005737//cytoplasm;GO:0043231//intracellular membrane-bounded organelle;GO:0005789//endoplasmic reticulum membrane;GO:0016020//membrane;GO:0005783//endoplasmic reticulum;GO:0031090//organelle membrane;GO:0030176//integral component of endoplasmic reticulum membrane	GO:0002138//retinoic acid biosynthetic process;GO:0008209//androgen metabolic process;GO:0042904//9-cis-retinoic acid biosynthetic process;GO:0055114//oxidation-reduction process;GO:0042448//progesterone metabolic process	GO:0004022//alcohol dehydrogenase (NAD) activity;GO:0016491//oxidoreductase activity;GO:0004745//retinol dehydrogenase activity;GO:0047035//testosterone dehydrogenase (NAD+) activity	K11149//Metabolic pathways;Retinol metabolism
Diaph1	ENSMUSG00000024456		0.245914	0.000362114	0.00141508		0.293292	0.000319476	0.00234209		GO:0072686//mitotic spindle;GO:0005903//brush border;GO:0005815//microtubule organizing center;GO:0032587//ruffle membrane;GO:0043005//neuron projection;GO:0016020//membrane;GO:0005886//plasma membrane;GO:0005856//cytoskeleton;GO:0005819//spindle;GO:0042995//cell projection;GO:0005737//cytoplasm	GO:0008360//regulation of cell shape;GO:0007015//actin filament organization;GO:0030036//actin cytoskeleton organization;GO:0030041//actin filament polymerization;GO:0007420//brain development;GO:0051279//regulation of release of sequestered calcium ion into cytosol;GO:0032886//regulation of microtubule-based process;GO:0071420//cellular response to histamine;GO:0035372//protein localization to m…	GO:0044325//ion channel binding;GO:0005515//protein binding;GO:0042802//identical protein binding;GO:0017048//Rho GTPase binding;GO:0005522//profilin binding;GO:0003723//RNA binding;GO:0003779//actin binding	K05740//Regulation of actin cytoskeleton;Focal adhesion;Shigellosis
Dio3	ENSMUSG00000075707		0.59736	4.94e-06	2.63e-05		0.496247	2.14e-07	3.75e-06		GO:0005886//plasma membrane;GO:0010008//endosome membrane;GO:0005768//endosome;GO:0016020//membrane;GO:0016021//integral component of membrane	GO:0006915//apoptotic process;GO:0042446//hormone biosynthetic process;GO:0046549//retinal cone cell development;GO:0055114//oxidation-reduction process;GO:0042404//thyroid hormone catabolic process;GO:0040018//positive regulation of multicellular organism growth	GO:0016491//oxidoreductase activity;GO:0033798//thyroxine 5-deiodinase activity;GO:0004800//thyroxine 5'-deiodinase activity	K07754//Thyroid hormone signaling pathway
Dkc1	ENSMUSG00000031403		0.760368	2.81e-27	6.13e-26		0.354161	4.37e-09	1.08e-07		GO:0001650//fibrillar center;GO:0031429//box H/ACA snoRNP complex;GO:0015030//Cajal body;GO:0005730//nucleolus;GO:0030529//intracellular ribonucleoprotein complex;GO:0090661//box H/ACA telomerase RNP complex;GO:0005634//nucleus;GO:0005697//telomerase holoenzyme complex	GO:1904874//positive regulation of telomerase RNA localization to Cajal body;GO:0032212//positive regulation of telomere maintenance via telomerase;GO:0042254//ribosome biogenesis;GO:1904872//regulation of telomerase RNA localization to Cajal body;GO:0001522//pseudouridine synthesis;GO:0007004//telomere maintenance via telomerase;GO:0031120//snRNA pseudouridine synthesis;GO:1990481//mRNA pseudour…	GO:0005515//protein binding;GO:0070034//telomerase RNA binding;GO:0016853//isomerase activity;GO:0003723//RNA binding;GO:0009982//pseudouridine synthase activity;GO:0003720//telomerase activity;GO:0034513//box H/ACA snoRNA binding	K11131//Ribosome biogenesis in eukaryotes
Dnm3os	ENSMUSG00000078190		0.480751	1.79e-05	8.69e-05		0.33461	3.91e-05	0.000387842		-	-	-	-
Dock10	ENSMUSG00000038608		4.55459	2.13e-301	1.02e-298		0.487305	3.23e-16	2.11e-14		GO:0070062//extracellular exosome;GO:0005622//intracellular;GO:0016020//membrane;GO:0005634//nucleus;GO:0005737//cytoplasm	GO:0065009//regulation of molecular function;GO:0030334//regulation of cell migration;GO:0007264//small GTPase mediated signal transduction	GO:0005085//guanyl-nucleotide exchange factor activity	-
Dock5	ENSMUSG00000044447		0.368737	5.38e-06	2.86e-05		0.237008	6.31e-05	0.000585807		GO:0005737//cytoplasm;GO:0016020//membrane;GO:0005886//plasma membrane;GO:0005829//cytosol	GO:1904694//negative regulation of vascular smooth muscle contraction;GO:0007264//small GTPase mediated signal transduction;GO:1900026//positive regulation of substrate adhesion-dependent cell spreading;GO:1904754//positive regulation of vascular associated smooth muscle cell migration;GO:0065009//regulation of molecular function;GO:0010634//positive regulation of epithelial cell migration	GO:0005085//guanyl-nucleotide exchange factor activity	-
Dock8	ENSMUSG00000052085		0.58918	0.000558123	0.00210325		0.808765	1.75e-08	3.83e-07		GO:0031252//cell leading edge;GO:0031258//lamellipodium membrane;GO:0031256//leading edge membrane;GO:0005737//cytoplasm;GO:0016020//membrane;GO:0042995//cell projection;GO:0005886//plasma membrane	GO:0070233//negative regulation of T cell apoptotic process;GO:0061485//memory T cell proliferation;GO:1990869//cellular response to chemokine;GO:2000406//positive regulation of T cell migration;GO:1903905//positive regulation of establishment of T cell polarity;GO:0001771//immunological synapse formation;GO:0007264//small GTPase mediated signal transduction;GO:0036336//dendritic cell migration;G…	GO:0005085//guanyl-nucleotide exchange factor activity;GO:0005515//protein binding	-
Dohh	ENSMUSG00000078440		0.318312	0.00327943	0.0104265		0.217124	0.00795168	0.0337989		-	GO:0008612//peptidyl-lysine modification to peptidyl-hypusine;GO:0055114//oxidation-reduction process	GO:0004497//monooxygenase activity;GO:0046872//metal ion binding;GO:0019135//deoxyhypusine monooxygenase activity;GO:0016491//oxidoreductase activity	-
Dok1	ENSMUSG00000068335		1.0775	3.01e-46	1.18e-44		0.244786	5.15e-06	6.47e-05		GO:0005634//nucleus;GO:0005829//cytosol;GO:0005737//cytoplasm;GO:0005622//intracellular	GO:0035556//intracellular signal transduction;GO:0000165//MAPK cascade;GO:0007169//transmembrane receptor protein tyrosine kinase signaling pathway;GO:0007265//Ras protein signal transduction	GO:0005057//signal transducer activity, downstream of receptor;GO:0005515//protein binding;GO:0005158//insulin receptor binding	K14752//Measles
Dph6	ENSMUSG00000057147		0.330437	1.02e-05	5.18e-05		0.197489	0.00336029	0.0167818		GO:0005634//nucleus;GO:0005730//nucleolus	GO:0031647//regulation of protein stability;GO:1903955//positive regulation of protein targeting to mitochondrion;GO:0017183//peptidyl-diphthamide biosynthetic process from peptidyl-histidine	GO:0000166//nucleotide binding;GO:0016874//ligase activity;GO:0005524//ATP binding;GO:0017178//diphthine-ammonia ligase activity	-
Dpp9	ENSMUSG00000001229		0.342656	1.34e-07	8.66e-07		0.397926	9.66e-11	3.24e-09		GO:0005737//cytoplasm;GO:0005829//cytosol	GO:0006508//proteolysis	GO:0008233//peptidase activity;GO:0016787//hydrolase activity;GO:0004177//aminopeptidase activity;GO:0008236//serine-type peptidase activity;GO:0042802//identical protein binding	-
Dram1	ENSMUSG00000020057		0.406064	0.00181722	0.00615235		0.320792	0.00404789	0.0195135		GO:0005765//lysosomal membrane;GO:0005764//lysosome;GO:0016020//membrane;GO:0016021//integral component of membrane;GO:0005737//cytoplasm	GO:0006915//apoptotic process;GO:0006914//autophagy;GO:0010506//regulation of autophagy	-	-
Dram2	ENSMUSG00000027900		0.255566	0.00986056	0.0277281		0.537646	3.46e-18	2.71e-16		GO:0005765//lysosomal membrane;GO:0005794//Golgi apparatus;GO:0016324//apical plasma membrane;GO:0016021//integral component of membrane;GO:0005737//cytoplasm;GO:0043231//intracellular membrane-bounded organelle;GO:0005764//lysosome;GO:0001917//photoreceptor inner segment;GO:0005886//plasma membrane;GO:0016020//membrane	GO:0045494//photoreceptor cell maintenance;GO:0006915//apoptotic process;GO:0007601//visual perception;GO:0010506//regulation of autophagy;GO:0006914//autophagy	-	-
Dtwd1	ENSMUSG00000023330		0.38871	3.82e-05	0.000176652		0.373353	1.77e-06	2.49e-05		-	-	-	-
Dusp3	ENSMUSG00000003518		0.218909	0.00263297	0.00858151		0.168062	0.0100447	0.0409145		GO:0005654//nucleoplasm;GO:0070062//extracellular exosome;GO:0001772//immunological synapse;GO:0005634//nucleus;GO:0005829//cytosol	GO:0070373//negative regulation of ERK1 and ERK2 cascade;GO:0035335//peptidyl-tyrosine dephosphorylation;GO:0001701//in utero embryonic development;GO:0000188//inactivation of MAPK activity;GO:0046329//negative regulation of JNK cascade;GO:0050860//negative regulation of T cell receptor signaling pathway;GO:0050868//negative regulation of T cell activation;GO:0043409//negative regulation of MAPK …	GO:0016787//hydrolase activity;GO:0019901//protein kinase binding;GO:0033549//MAP kinase phosphatase activity;GO:0008138//protein tyrosine/serine/threonine phosphatase activity;GO:0004725//protein tyrosine phosphatase activity;GO:0004721//phosphoprotein phosphatase activity;GO:0016791//phosphatase activity	K17614//MAPK signaling pathway
Dusp4	ENSMUSG00000031530		0.873365	3.1e-10	2.62e-09		1.35182	3.21e-101	1.04e-97		GO:0005634//nucleus;GO:0005654//nucleoplasm	GO:0016311//dephosphorylation;GO:0001706//endoderm formation;GO:0006470//protein dephosphorylation;GO:0035970//peptidyl-threonine dephosphorylation;GO:0000188//inactivation of MAPK activity;GO:0070373//negative regulation of ERK1 and ERK2 cascade;GO:0035335//peptidyl-tyrosine dephosphorylation	GO:0016787//hydrolase activity;GO:0016791//phosphatase activity;GO:0008330//protein tyrosine/threonine phosphatase activity;GO:0008138//protein tyrosine/serine/threonine phosphatase activity;GO:0004725//protein tyrosine phosphatase activity;GO:0017017//MAP kinase tyrosine/serine/threonine phosphatase activity;GO:0004721//phosphoprotein phosphatase activity;GO:1990439//MAP kinase serine/threonine …	K04459//MAPK signaling pathway
Dusp6	ENSMUSG00000019960		1.13434	4.45e-69	2.88e-67		1.13505	6.9e-117	5.6e-113		GO:0005737//cytoplasm;GO:0005829//cytosol	GO:0060420//regulation of heart growth;GO:0070848//response to growth factor;GO:0043065//positive regulation of apoptotic process;GO:0006470//protein dephosphorylation;GO:0030154//cell differentiation;GO:0042493//response to drug;GO:0040036//regulation of fibroblast growth factor receptor signaling pathway;GO:0070373//negative regulation of ERK1 and ERK2 cascade;GO:0010942//positive regulation of…	GO:0016791//phosphatase activity;GO:0004721//phosphoprotein phosphatase activity;GO:0005515//protein binding;GO:0016787//hydrolase activity;GO:0008138//protein tyrosine/serine/threonine phosphatase activity;GO:0004725//protein tyrosine phosphatase activity;GO:0017017//MAP kinase tyrosine/serine/threonine phosphatase activity	K04459//MAPK signaling pathway
Dynlt1a	ENSMUSG00000092074		0.561713	0.00150577	0.00518546		0.51391	0.000618043	0.00409908		GO:0005794//Golgi apparatus;GO:0030286//dynein complex;GO:0005737//cytoplasm;GO:0099503//secretory vesicle;GO:0005819//spindle;GO:0044297//cell body;GO:0005881//cytoplasmic microtubule;GO:0005856//cytoskeleton;GO:0005874//microtubule;GO:0005868//cytoplasmic dynein complex;GO:0030426//growth cone;GO:0001917//photoreceptor inner segment	GO:0007399//nervous system development;GO:0006810//transport;GO:0051301//cell division;GO:0050768//negative regulation of neurogenesis;GO:0007049//cell cycle;GO:0010976//positive regulation of neuron projection development;GO:0008277//regulation of G-protein coupled receptor protein signaling pathway;GO:0070373//negative regulation of ERK1 and ERK2 cascade;GO:0000132//establishment of mitotic spi…	GO:0042802//identical protein binding;GO:0005515//protein binding;GO:0031681//G-protein beta-subunit binding;GO:0030742//GTP-dependent protein binding;GO:0003774//motor activity	-
E2f8	ENSMUSG00000046179		0.934542	0.000759515	0.00278845		0.962265	2.06e-10	6.43e-09		GO:0005667//transcription factor complex;GO:0005730//nucleolus;GO:0005634//nucleus;GO:0005829//cytosol	GO:0000122//negative regulation of transcription from RNA polymerase II promoter;GO:0007049//cell cycle;GO:0002040//sprouting angiogenesis;GO:0032466//negative regulation of cytokinesis;GO:0033301//cell cycle comprising mitosis without cytokinesis;GO:0060707//trophoblast giant cell differentiation;GO:0008283//cell proliferation;GO:0045944//positive regulation of transcription from RNA polymerase …	GO:0003700//transcription factor activity, sequence-specific DNA binding;GO:0042803//protein homodimerization activity;GO:0042802//identical protein binding;GO:0003714//transcription corepressor activity;GO:0003677//DNA binding;GO:0001078//transcriptional repressor activity, RNA polymerase II core promoter proximal region sequence-specific binding;GO:0001047//core promoter binding;GO:0000978//RNA…	-
Efhd2	ENSMUSG00000040659		0.274916	0.00151174	0.00520353		0.280992	0.00013373	0.00111517		-	-	GO:0045296//cadherin binding;GO:0005509//calcium ion binding	-
Ehd4	ENSMUSG00000027293		0.561548	1.67e-14	1.98e-13		0.168015	0.00932873	0.0385104		GO:0005886//plasma membrane;GO:0016020//membrane;GO:0055038//recycling endosome membrane;GO:0005783//endoplasmic reticulum;GO:0005768//endosome;GO:0048471//perinuclear region of cytoplasm;GO:0031901//early endosome membrane;GO:0070062//extracellular exosome	GO:0050731//positive regulation of peptidyl-tyrosine phosphorylation;GO:0032456//endocytic recycling;GO:0051260//protein homooligomerization;GO:0071363//cellular response to growth factor stimulus;GO:0030100//regulation of endocytosis;GO:0006907//pinocytosis	GO:0046872//metal ion binding;GO:0005509//calcium ion binding;GO:0045296//cadherin binding;GO:0005525//GTP binding;GO:0005524//ATP binding;GO:0005515//protein binding;GO:0000166//nucleotide binding	K12477//Endocytosis
Eif1a	ENSMUSG00000057561		1.20032	2.54e-45	9.61e-44		0.36502	8.39e-09	1.96e-07		-	GO:0006413//translational initiation;GO:0006412//translation	GO:0003723//RNA binding;GO:0003743//translation initiation factor activity	K03236//RNA transport
Eif2b2	ENSMUSG00000004788		0.298118	0.000112224	0.000479844		0.329268	1.52e-06	2.16e-05		GO:0005851//eukaryotic translation initiation factor 2B complex;GO:0005737//cytoplasm	GO:0014003//oligodendrocyte development;GO:0042552//myelination;GO:0006413//translational initiation;GO:0044237//cellular metabolic process;GO:0006412//translation;GO:0051716//cellular response to stimulus;GO:0007417//central nervous system development;GO:0001541//ovarian follicle development;GO:0065009//regulation of molecular function	GO:0003743//translation initiation factor activity;GO:0005085//guanyl-nucleotide exchange factor activity;GO:0005525//GTP binding;GO:0005524//ATP binding	K03754//RNA transport
Eif4a1	ENSMUSG00000059796		0.22299	0.00460304	0.0141187		0.239606	9.35e-05	0.000822146		GO:0016020//membrane;GO:0005737//cytoplasm;GO:0031012//extracellular matrix;GO:0005730//nucleolus;GO:0070062//extracellular exosome	GO:0006413//translational initiation;GO:0010501//RNA secondary structure unwinding;GO:0006412//translation;GO:0010468//regulation of gene expression	GO:0005515//protein binding;GO:0005524//ATP binding;GO:0004004//ATP-dependent RNA helicase activity;GO:0003723//RNA binding;GO:0003743//translation initiation factor activity;GO:0003725//double-stranded RNA binding;GO:0016787//hydrolase activity;GO:0003676//nucleic acid binding;GO:0000166//nucleotide binding;GO:0004386//helicase activity	K03257//RNA transport
Eif4a-ps4	ENSMUSG00000101188		0.280525	0.0119094	0.032646		0.489949	0.000856885	0.00543241		-	-	-	-
Elovl5	ENSMUSG00000032349		0.41876	6.17e-15	7.52e-14		0.143022	0.00307362	0.0156147		GO:0016020//membrane;GO:0097447//dendritic tree;GO:0030176//integral component of endoplasmic reticulum membrane;GO:0042995//cell projection;GO:0005783//endoplasmic reticulum;GO:0030425//dendrite;GO:0016021//integral component of membrane;GO:0005789//endoplasmic reticulum membrane;GO:0043025//neuronal cell body	GO:0006631//fatty acid metabolic process;GO:0006636//unsaturated fatty acid biosynthetic process;GO:0045723//positive regulation of fatty acid biosynthetic process;GO:0006629//lipid metabolic process;GO:0006633//fatty acid biosynthetic process;GO:0019367//fatty acid elongation, saturated fatty acid;GO:0034625//fatty acid elongation, monounsaturated fatty acid;GO:0034626//fatty acid elongation, po…	GO:0102337//3-oxo-cerotoyl-CoA synthase activity;GO:0102756//very-long-chain 3-ketoacyl-CoA synthase activity;GO:0102336//3-oxo-arachidoyl-CoA synthase activity;GO:0016740//transferase activity;GO:0009922//fatty acid elongase activity;GO:0102338//3-oxo-lignoceronyl-CoA synthase activity	K10244//Fatty acid metabolism;Fatty acid elongation;Biosynthesis of unsaturated fatty acids;Biosynthesis of secondary metabolites
Elovl6	ENSMUSG00000041220		0.240504	0.00126156	0.00442108		0.291719	2.6e-05	0.00027238		GO:0016021//integral component of membrane;GO:0005789//endoplasmic reticulum membrane;GO:0005783//endoplasmic reticulum;GO:0016020//membrane;GO:0030176//integral component of endoplasmic reticulum membrane	GO:0042759//long-chain fatty acid biosynthetic process;GO:0006629//lipid metabolic process;GO:0006631//fatty acid metabolic process;GO:0019367//fatty acid elongation, saturated fatty acid;GO:0030497//fatty acid elongation;GO:0006633//fatty acid biosynthetic process;GO:0042761//very long-chain fatty acid biosynthetic process;GO:0034626//fatty acid elongation, polyunsaturated fatty acid;GO:0034625/…	GO:0016740//transferase activity;GO:0009922//fatty acid elongase activity;GO:0102338//3-oxo-lignoceronyl-CoA synthase activity;GO:0016747//transferase activity, transferring acyl groups other than amino-acyl groups;GO:0102337//3-oxo-cerotoyl-CoA synthase activity;GO:0102756//very-long-chain 3-ketoacyl-CoA synthase activity;GO:0102336//3-oxo-arachidoyl-CoA synthase activity	K10203//Biosynthesis of secondary metabolites;Biosynthesis of unsaturated fatty acids;Fatty acid metabolism;Fatty acid elongation
Emilin2	ENSMUSG00000024053		0.419015	1.01e-06	5.94e-06		0.286019	0.000174685	0.00140058		GO:0005581//collagen trimer;GO:0005576//extracellular region;GO:0005615//extracellular space;GO:0031012//extracellular matrix;GO:0005578//proteinaceous extracellular matrix	GO:0007155//cell adhesion	-	-
Epas1	ENSMUSG00000024140		1.15775	0.000395975	0.00153631		1.03941	2.69e-05	0.000280199		GO:0005737//cytoplasm;GO:0005634//nucleus;GO:0016607//nuclear speck;GO:0005667//transcription factor complex	GO:0030218//erythrocyte differentiation;GO:0030097//hemopoiesis;GO:0007005//mitochondrion organization;GO:0043129//surfactant homeostasis;GO:0006366//transcription from RNA polymerase II promoter;GO:0045944//positive regulation of transcription from RNA polymerase II promoter;GO:0006355//regulation of transcription, DNA-templated;GO:0001525//angiogenesis;GO:0055072//iron ion homeostasis;GO:004862…	GO:0046982//protein heterodimerization activity;GO:0043565//sequence-specific DNA binding;GO:0003700//transcription factor activity, sequence-specific DNA binding;GO:0046983//protein dimerization activity;GO:0008134//transcription factor binding;GO:0001077//transcriptional activator activity, RNA polymerase II core promoter proximal region sequence-specific binding;GO:0035035//histone acetyltrans…	K09095//Pathways in cancer;Renal cell carcinoma
Epha2	ENSMUSG00000006445		0.776903	3.8e-19	5.83e-18		0.62663	7.71e-25	1.1e-22		GO:0030027//lamellipodium;GO:0005886//plasma membrane;GO:0032587//ruffle membrane;GO:0016020//membrane;GO:0031256//leading edge membrane;GO:0031258//lamellipodium membrane;GO:0005622//intracellular;GO:0005887//integral component of plasma membrane;GO:0005925//focal adhesion;GO:0030054//cell junction;GO:0042995//cell projection;GO:0016021//integral component of membrane;GO:0009986//cell surface	GO:0030182//neuron differentiation;GO:0006915//apoptotic process;GO:0006468//protein phosphorylation;GO:0001525//angiogenesis;GO:0014028//notochord formation;GO:0090630//activation of GTPase activity;GO:0001501//skeletal system development;GO:0033628//regulation of cell adhesion mediated by integrin;GO:0070309//lens fiber cell morphogenesis;GO:0043535//regulation of blood vessel endothelial cell …	GO:0005524//ATP binding;GO:0005515//protein binding;GO:0005003//ephrin receptor activity;GO:0016740//transferase activity;GO:0004714//transmembrane receptor protein tyrosine kinase activity;GO:0004713//protein tyrosine kinase activity;GO:0045296//cadherin binding;GO:0000166//nucleotide binding;GO:0004672//protein kinase activity;GO:0016301//kinase activity	K05103//PI3K-Akt signaling pathway;Axon guidance;Ras signaling pathway;Rap1 signaling pathway
Eps8	ENSMUSG00000015766		0.586773	6.53e-20	1.04e-18		0.492751	1.41e-23	1.76e-21		GO:0032420//stereocilium;GO:0005737//cytoplasm;GO:0005938//cell cortex;GO:0030054//cell junction;GO:0045202//synapse;GO:0014069//postsynaptic density;GO:0005903//brush border;GO:0030426//growth cone;GO:0031982//vesicle;GO:0032587//ruffle membrane;GO:0016020//membrane;GO:0032426//stereocilium tip;GO:0070062//extracellular exosome;GO:0017146//NMDA selective glutamate receptor complex;GO:0042995//ce…	GO:0008360//regulation of cell shape;GO:0016601//Rac protein signal transduction;GO:0030832//regulation of actin filament length;GO:0010458//exit from mitosis;GO:0048149//behavioral response to ethanol;GO:0051764//actin crosslink formation;GO:0070358//actin polymerization-dependent cell motility;GO:0008344//adult locomotory behavior;GO:0036336//dendritic cell migration;GO:0051017//actin filament …	GO:0005515//protein binding;GO:0035591//signaling adaptor activity;GO:0048365//Rac GTPase binding;GO:0003779//actin binding	-
Ereg	ENSMUSG00000029377		1.0488	3.91e-66	2.37e-64		1.08441	8.56e-105	4.63e-101		GO:0005576//extracellular region;GO:0016020//membrane;GO:0005886//plasma membrane;GO:0016021//integral component of membrane;GO:0005615//extracellular space	GO:0045840//positive regulation of mitotic nuclear division;GO:0019221//cytokine-mediated signaling pathway;GO:0008285//negative regulation of cell proliferation;GO:0045410//positive regulation of interleukin-6 biosynthetic process;GO:0030154//cell differentiation;GO:0048146//positive regulation of fibroblast proliferation;GO:0043434//response to peptide hormone;GO:0042700//luteinizing hormone si…	GO:0008083//growth factor activity;GO:0005154//epidermal growth factor receptor binding	K09784//ErbB signaling pathway
Ermp1	ENSMUSG00000046324		0.82139	2.97e-40	9.88e-39		0.563784	2.28e-26	3.74e-24		GO:0005789//endoplasmic reticulum membrane;GO:0016021//integral component of membrane;GO:0016020//membrane;GO:0005783//endoplasmic reticulum	GO:0006508//proteolysis	GO:0016787//hydrolase activity;GO:0008237//metallopeptidase activity;GO:0008233//peptidase activity;GO:0046872//metal ion binding	-
Errfi1	ENSMUSG00000028967		2.38974	6.66e-303	3.28e-300		0.359574	2.78e-15	1.63e-13		GO:0005737//cytoplasm;GO:0031234//extrinsic component of cytoplasmic side of plasma membrane;GO:0016020//membrane;GO:0005886//plasma membrane;GO:0005634//nucleus;GO:0005829//cytosol	GO:0032966//negative regulation of collagen biosynthetic process;GO:0045616//regulation of keratinocyte differentiation;GO:0031098//stress-activated protein kinase signaling cascade;GO:0007175//negative regulation of epidermal growth factor-activated receptor activity;GO:0042059//negative regulation of epidermal growth factor receptor signaling pathway;GO:0048286//lung alveolus development;GO:003…	GO:0005515//protein binding;GO:0017124//SH3 domain binding;GO:0019900//kinase binding;GO:0031267//small GTPase binding;GO:0019901//protein kinase binding	-
Etv1	ENSMUSG00000004151		1.85778	3.19e-26	6.69e-25		1.17351	7.95e-24	1.02e-21		GO:0005634//nucleus	GO:0006366//transcription from RNA polymerase II promoter;GO:0007638//mechanosensory behavior;GO:0045944//positive regulation of transcription from RNA polymerase II promoter;GO:0048935//peripheral nervous system neuron development;GO:0006357//regulation of transcription from RNA polymerase II promoter;GO:0006355//regulation of transcription, DNA-templated;GO:0007411//axon guidance;GO:0006351//tr…	GO:0003677//DNA binding;GO:0000978//RNA polymerase II core promoter proximal region sequence-specific DNA binding;GO:0001077//transcriptional activator activity, RNA polymerase II core promoter proximal region sequence-specific binding;GO:0000981//RNA polymerase II transcription factor activity, sequence-specific DNA binding;GO:0043565//sequence-specific DNA binding;GO:0003700//transcription fact…	K09431//Transcriptional misregulation in cancer
Etv4	ENSMUSG00000017724		0.895304	4.31e-08	2.94e-07		1.12447	3.88e-34	9.99e-32		GO:0005634//nucleus;GO:0005622//intracellular;GO:0005730//nucleolus	GO:0006355//regulation of transcription, DNA-templated;GO:0060444//branching involved in mammary gland duct morphogenesis;GO:0008045//motor neuron axon guidance;GO:0010628//positive regulation of gene expression;GO:0006351//transcription, DNA-templated;GO:0045944//positive regulation of transcription from RNA polymerase II promoter;GO:0033600//negative regulation of mammary gland epithelial cell …	GO:0003700//transcription factor activity, sequence-specific DNA binding;GO:0043565//sequence-specific DNA binding;GO:0000981//RNA polymerase II transcription factor activity, sequence-specific DNA binding;GO:0000978//RNA polymerase II core promoter proximal region sequence-specific DNA binding;GO:0003677//DNA binding	K15592//Transcriptional misregulation in cancer
Etv5	ENSMUSG00000013089		0.821485	1.55e-13	1.72e-12		0.811374	1.48e-22	1.64e-20		GO:0005654//nucleoplasm;GO:0005634//nucleus;GO:0005886//plasma membrane	GO:0060252//positive regulation of glial cell proliferation;GO:0048133//male germ-line stem cell asymmetric division;GO:0060762//regulation of branching involved in mammary gland duct morphogenesis;GO:0050807//regulation of synapse organization;GO:0045893//positive regulation of transcription, DNA-templated;GO:0045666//positive regulation of neuron differentiation;GO:0030154//cell differentiation…	GO:0003700//transcription factor activity, sequence-specific DNA binding;GO:0001228//transcriptional activator activity, RNA polymerase II transcription regulatory region sequence-specific binding;GO:0000977//RNA polymerase II regulatory region sequence-specific DNA binding;GO:0043565//sequence-specific DNA binding;GO:0000981//RNA polymerase II transcription factor activity, sequence-specific DNA…	K15593//Transcriptional misregulation in cancer
Exoc3l4	ENSMUSG00000021280		1.34494	3.08e-12	3.06e-11		1.03918	2.11e-14	1.13e-12		GO:0000145//exocyst	GO:0006887//exocytosis	-	-
Exosc2	ENSMUSG00000039356		0.184347	0.0127156	0.034562		0.211851	0.00245238	0.0129612		GO:0005634//nucleus;GO:0000176//nuclear exosome (RNase complex);GO:0000177//cytoplasmic exosome (RNase complex);GO:0005737//cytoplasm;GO:0005730//nucleolus;GO:0000178//exosome (RNase complex)	GO:0034475//U4 snRNA 3'-end processing;GO:0030307//positive regulation of cell growth;GO:0071051//polyadenylation-dependent snoRNA 3'-end processing;GO:0034427//nuclear-transcribed mRNA catabolic process, exonucleolytic, 3'-5';GO:0006364//rRNA processing;GO:0071038//nuclear polyadenylation-dependent tRNA catabolic process;GO:0071035//nuclear polyadenylation-dependent rRNA catabolic process;GO:007…	GO:0003723//RNA binding	K03679//RNA degradation
Ezr	ENSMUSG00000052397		1.0708	7.69e-83	6.43e-81		0.22157	1.45e-06	2.07e-05		GO:0005768//endosome;GO:0042995//cell projection;GO:0001650//fibrillar center;GO:0001931//uropod;GO:0045121//membrane raft;GO:0051286//cell tip;GO:0043234//protein complex;GO:0016324//apical plasma membrane;GO:0001772//immunological synapse;GO:0070062//extracellular exosome;GO:0005902//microvillus;GO:0019898//extrinsic component of membrane;GO:0016323//basolateral plasma membrane;GO:0071437//inva…	GO:1903753//negative regulation of p38MAPK cascade;GO:0010737//protein kinase A signaling;GO:0030033//microvillus assembly;GO:1902896//terminal web assembly;GO:1902966//positive regulation of protein localization to early endosome;GO:0030953//astral microtubule organization;GO:0034629//cellular protein complex localization;GO:0043622//cortical microtubule organization;GO:0035088//establishment or…	GO:0034236//protein kinase A catalytic subunit binding;GO:0005515//protein binding;GO:0034237//protein kinase A regulatory subunit binding;GO:0019904//protein domain specific binding;GO:0008092//cytoskeletal protein binding;GO:0051015//actin filament binding;GO:0097718//disordered domain specific binding;GO:0003779//actin binding;GO:0045296//cadherin binding;GO:0003723//RNA binding;GO:0051018//pr…	K08007//Regulation of actin cytoskeleton;MicroRNAs in cancer;Pathogenic Escherichia coli infection;Gastric acid secretion;Proteoglycans in cancer;Leukocyte transendothelial migration
F2r	ENSMUSG00000048376		0.812705	1.45e-46	5.76e-45		0.201118	2.55e-05	0.000267047		GO:0005770//late endosome;GO:0005887//integral component of plasma membrane;GO:0016021//integral component of membrane;GO:0009986//cell surface;GO:0005901//caveola;GO:0045211//postsynaptic membrane;GO:0031094//platelet dense tubular network;GO:0005769//early endosome;GO:0031594//neuromuscular junction;GO:0016020//membrane;GO:0005886//plasma membrane	GO:0007529//establishment of synaptic specificity at neuromuscular junction;GO:0008285//negative regulation of cell proliferation;GO:0048873//homeostasis of number of cells within a tissue;GO:0051928//positive regulation of calcium ion transport;GO:0007204//positive regulation of cytosolic calcium ion concentration;GO:0030193//regulation of blood coagulation;GO:0045907//positive regulation of vas…	GO:0005102//receptor binding;GO:0001965//G-protein alpha-subunit binding;GO:0032795//heterotrimeric G-protein binding;GO:0004871//signal transducer activity;GO:0004930//G-protein coupled receptor activity;GO:0015057//thrombin-activated receptor activity;GO:0031681//G-protein beta-subunit binding	K03914//Regulation of actin cytoskeleton;Calcium signaling pathway;Phospholipase D signaling pathway;Neuroactive ligand-receptor interaction;PI3K-Akt signaling pathway;cAMP signaling pathway;Platelet activation;Pathways in cancer;Endocytosis;Complement and coagulation cascades;Rap1 signaling pathway
F8	ENSMUSG00000031196		0.402858	7.56e-10	6.16e-09		0.203824	0.000742813	0.00480108		GO:0005576//extracellular region;GO:0005615//extracellular space	GO:0006953//acute-phase response;GO:0055114//oxidation-reduction process;GO:0030168//platelet activation;GO:0007599//hemostasis;GO:0007596//blood coagulation	GO:0046872//metal ion binding;GO:0005507//copper ion binding;GO:0016491//oxidoreductase activity	K03899//Complement and coagulation cascades
Fah	ENSMUSG00000030630		1.08286	1.02e-36	3.11e-35		0.195186	0.00747057	0.0321729		GO:0070062//extracellular exosome	GO:0006527//arginine catabolic process;GO:0006572//tyrosine catabolic process;GO:0008152//metabolic process;GO:0009072//aromatic amino acid family metabolic process;GO:0006559//L-phenylalanine catabolic process	GO:0003824//catalytic activity;GO:0046872//metal ion binding;GO:0016787//hydrolase activity;GO:0004334//fumarylacetoacetase activity	K01555//Microbial metabolism in diverse environments;Tyrosine metabolism;Styrene degradation;Metabolic pathways
Fam129b	ENSMUSG00000026796		0.360958	1.27e-10	1.12e-09		0.328907	4.5e-12	1.81e-10		GO:0005737//cytoplasm;GO:0030054//cell junction;GO:0070062//extracellular exosome;GO:0005829//cytosol;GO:0005886//plasma membrane;GO:0016020//membrane;GO:0005912//adherens junction;GO:0005654//nucleoplasm	GO:0034337//RNA folding;GO:0008285//negative regulation of cell proliferation;GO:0032274//gonadotropin secretion;GO:0045892//negative regulation of transcription, DNA-templated;GO:2000279//negative regulation of DNA biosynthetic process;GO:0045893//positive regulation of transcription, DNA-templated;GO:0043066//negative regulation of apoptotic process	GO:0045296//cadherin binding;GO:0003713//transcription coactivator activity	-
Fam169b	ENSMUSG00000074071		1.56502	5.22e-09	3.9e-08		0.548737	0.00182171	0.0101396		-	-	-	-
Fbl	ENSMUSG00000046865		0.205764	0.00509425	0.0154612		0.155583	0.0128588	0.0497676		GO:0005730//nucleolus;GO:0070062//extracellular exosome;GO:0030529//intracellular ribonucleoprotein complex;GO:0031428//box C/D snoRNP complex;GO:0032040//small-subunit processome;GO:0001650//fibrillar center;GO:0015030//Cajal body;GO:0001651//dense fibrillar component;GO:0005654//nucleoplasm;GO:0001652//granular component;GO:0005694//chromosome;GO:0016020//membrane;GO:0005634//nucleus	GO:1990258//histone glutamine methylation;GO:0032259//methylation;GO:0001649//osteoblast differentiation;GO:0031167//rRNA methylation;GO:0016074//snoRNA metabolic process;GO:0048254//snoRNA localization;GO:0000494//box C/D snoRNA 3'-end processing;GO:0008033//tRNA processing;GO:0006364//rRNA processing	GO:1990259//histone-glutamine methyltransferase activity;GO:0016740//transferase activity;GO:0008649//rRNA methyltransferase activity;GO:0051117//ATPase binding;GO:0008168//methyltransferase activity;GO:0001094//TFIID-class transcription factor binding;GO:0003723//RNA binding	K14563//Ribosome biogenesis in eukaryotes
Fbxl5	ENSMUSG00000039753		0.816248	2.07e-53	9.66e-52		0.283206	5.14e-09	1.25e-07		GO:0019005//SCF ubiquitin ligase complex;GO:0048471//perinuclear region of cytoplasm;GO:0005737//cytoplasm	GO:0031146//SCF-dependent proteasomal ubiquitin-dependent protein catabolic process;GO:0016567//protein ubiquitination;GO:0055072//iron ion homeostasis;GO:1903364//positive regulation of cellular protein catabolic process	GO:0046872//metal ion binding;GO:0005506//iron ion binding;GO:0004842//ubiquitin-protein transferase activity	-
Fbxl7	ENSMUSG00000043556		0.432985	0.00183529	0.00620478		0.396953	0.000256889	0.00194354		GO:0005856//cytoskeleton;GO:0005737//cytoplasm;GO:0005815//microtubule organizing center;GO:0005813//centrosome;GO:0019005//SCF ubiquitin ligase complex	GO:0008283//cell proliferation;GO:0007049//cell cycle;GO:0000086//G2/M transition of mitotic cell cycle;GO:0031146//SCF-dependent proteasomal ubiquitin-dependent protein catabolic process;GO:0051301//cell division;GO:0000278//mitotic cell cycle;GO:0016567//protein ubiquitination	GO:0004842//ubiquitin-protein transferase activity;GO:0005515//protein binding	-
Fez1	ENSMUSG00000032118		0.289351	1.58e-06	8.99e-06		0.229296	2.28e-05	0.000243514		GO:0043025//neuronal cell body;GO:0005794//Golgi apparatus;GO:0005739//mitochondrion;GO:0030424//axon;GO:0042995//cell projection;GO:0030425//dendrite;GO:0005737//cytoplasm;GO:0005813//centrosome;GO:0005886//plasma membrane;GO:0016020//membrane;GO:0005815//microtubule organizing center;GO:0030426//growth cone;GO:0005874//microtubule;GO:0005856//cytoskeleton	GO:0061881//positive regulation of anterograde axonal transport of mitochondrion;GO:0006810//transport;GO:0007411//axon guidance;GO:0070584//mitochondrion morphogenesis;GO:0051654//establishment of mitochondrion localization;GO:0071363//cellular response to growth factor stimulus;GO:1902902//negative regulation of autophagosome assembly;GO:0021766//hippocampus development;GO:0010976//positive reg…	GO:0047485//protein N-terminus binding;GO:0005080//protein kinase C binding;GO:0043015//gamma-tubulin binding;GO:0005515//protein binding	-
Fgd6	ENSMUSG00000020021		0.998607	7.94e-19	1.2e-17		0.760985	3.74e-20	3.41e-18		GO:0005737//cytoplasm;GO:0005856//cytoskeleton	GO:0065009//regulation of molecular function;GO:0035023//regulation of Rho protein signal transduction	GO:0005085//guanyl-nucleotide exchange factor activity;GO:0046872//metal ion binding;GO:0005089//Rho guanyl-nucleotide exchange factor activity	-
Fgf10	ENSMUSG00000021732		0.314791	6.91e-06	3.62e-05		0.337223	3.82e-07	6.36e-06		GO:0031012//extracellular matrix;GO:0009986//cell surface;GO:0005615//extracellular space;GO:0005634//nucleus;GO:0005886//plasma membrane;GO:0005576//extracellular region	GO:0051549//positive regulation of keratinocyte migration;GO:0001759//organ induction;GO:0032808//lacrimal gland development;GO:0030154//cell differentiation;GO:0048146//positive regulation of fibroblast proliferation;GO:0070371//ERK1 and ERK2 cascade;GO:0031532//actin cytoskeleton reorganization;GO:0001656//metanephros development;GO:0090263//positive regulation of canonical Wnt signaling pathwa…	GO:0005111//type 2 fibroblast growth factor receptor binding;GO:0008201//heparin binding;GO:0005104//fibroblast growth factor receptor binding;GO:0008083//growth factor activity;GO:0042056//chemoattractant activity;GO:0005515//protein binding	K04358//PI3K-Akt signaling pathway;MAPK signaling pathway;Melanoma;Regulation of actin cytoskeleton;Ras signaling pathway;Rap1 signaling pathway;Pathways in cancer
Fgfr1	ENSMUSG00000031565		0.256975	3.97e-05	0.000183194		0.587152	4.75e-20	4.31e-18		GO:0031410//cytoplasmic vesicle;GO:0005730//nucleolus;GO:0043235//receptor complex;GO:0005737//cytoplasm;GO:0016021//integral component of membrane;GO:0016020//membrane;GO:0005829//cytosol;GO:0005886//plasma membrane;GO:0005634//nucleus	GO:0045787//positive regulation of cell cycle;GO:0000122//negative regulation of transcription from RNA polymerase II promoter;GO:0060117//auditory receptor cell development;GO:0042474//middle ear morphogenesis;GO:0043410//positive regulation of MAPK cascade;GO:0002062//chondrocyte differentiation;GO:0042473//outer ear morphogenesis;GO:0048378//regulation of lateral mesodermal cell fate specifica…	GO:0008201//heparin binding;GO:0004672//protein kinase activity;GO:0017134//fibroblast growth factor binding;GO:0016301//kinase activity;GO:0090722//receptor-receptor interaction;GO:0000166//nucleotide binding;GO:0005007//fibroblast growth factor-activated receptor activity;GO:0004713//protein tyrosine kinase activity;GO:0004714//transmembrane receptor protein tyrosine kinase activity;GO:0042803/…	K04362//Prostate cancer;PI3K-Akt signaling pathway;Pathways in cancer;Central carbon metabolism in cancer;Rap1 signaling pathway;Signaling pathways regulating pluripotency of stem cells;Melanoma;Regulation of actin cytoskeleton;Proteoglycans in cancer;MAPK signaling pathway;Adherens junction;Ras signaling pathway
Fmnl2	ENSMUSG00000036053		0.738909	1.45e-30	3.58e-29		0.478976	4.87e-18	3.78e-16		GO:0005737//cytoplasm	GO:0016043//cellular component organization;GO:0022604//regulation of cell morphogenesis;GO:0030036//actin cytoskeleton organization;GO:0030866//cortical actin cytoskeleton organization;GO:0007010//cytoskeleton organization	GO:0003779//actin binding;GO:0045296//cadherin binding;GO:0017048//Rho GTPase binding	-
Fmo1	ENSMUSG00000040181		4.91229	1.36e-40	4.56e-39		0.541904	2.12e-05	0.000228141		GO:0031090//organelle membrane;GO:0043231//intracellular membrane-bounded organelle;GO:0005789//endoplasmic reticulum membrane;GO:0016021//integral component of membrane;GO:0016020//membrane;GO:0005783//endoplasmic reticulum	GO:0017144//drug metabolic process;GO:0032496//response to lipopolysaccharide;GO:0009404//toxin metabolic process;GO:0006082//organic acid metabolic process;GO:0006970//response to osmotic stress;GO:0055114//oxidation-reduction process;GO:0070995//NADPH oxidation	GO:0050661//NADP binding;GO:0016491//oxidoreductase activity;GO:0050660//flavin adenine dinucleotide binding;GO:0004497//monooxygenase activity;GO:0004499//N,N-dimethylaniline monooxygenase activity	K00485//Microbial metabolism in diverse environments;Drug metabolism - cytochrome P450
Fmo2	ENSMUSG00000040170		6.02082	6.35e-195	1.6e-192		0.931902	2.22e-36	6.31e-34		GO:0031090//organelle membrane;GO:0016020//membrane;GO:0005783//endoplasmic reticulum;GO:0005789//endoplasmic reticulum membrane;GO:0043231//intracellular membrane-bounded organelle;GO:0016021//integral component of membrane	GO:0009404//toxin metabolic process;GO:0006082//organic acid metabolic process;GO:0055114//oxidation-reduction process;GO:0017144//drug metabolic process;GO:0072592//oxygen metabolic process;GO:0006739//NADP metabolic process;GO:0006805//xenobiotic metabolic process;GO:0070995//NADPH oxidation	GO:0004499//N,N-dimethylaniline monooxygenase activity;GO:0004497//monooxygenase activity;GO:0050660//flavin adenine dinucleotide binding;GO:0016491//oxidoreductase activity;GO:0050661//NADP binding	K00485//Drug metabolism - cytochrome P450;Microbial metabolism in diverse environments
Fmo3	ENSMUSG00000026691		8.67317	3.59e-13	3.86e-12		0.886419	4.32e-11	1.52e-09		GO:0031090//organelle membrane;GO:0016020//membrane;GO:0005783//endoplasmic reticulum;GO:0043231//intracellular membrane-bounded organelle;GO:0005789//endoplasmic reticulum membrane;GO:0016021//integral component of membrane	GO:0055114//oxidation-reduction process	GO:0004499//N,N-dimethylaniline monooxygenase activity;GO:0004497//monooxygenase activity;GO:0034899//trimethylamine monooxygenase activity;GO:0050661//NADP binding;GO:0050660//flavin adenine dinucleotide binding;GO:0016491//oxidoreductase activity	K00485//Microbial metabolism in diverse environments;Drug metabolism - cytochrome P450
Fnip2	ENSMUSG00000061175		0.370054	0.000202556	0.000828623		0.405945	4.14e-10	1.24e-08		GO:0005886//plasma membrane;GO:0005634//nucleus;GO:0005737//cytoplasm	GO:0043086//negative regulation of catalytic activity;GO:0031334//positive regulation of protein complex assembly;GO:0001932//regulation of protein phosphorylation;GO:0000122//negative regulation of transcription from RNA polymerase II promoter;GO:0033138//positive regulation of peptidyl-serine phosphorylation;GO:0006974//cellular response to DNA damage stimulus;GO:0008630//intrinsic apoptotic si…	GO:0042030//ATPase inhibitor activity;GO:0051087//chaperone binding	-
Folh1	ENSMUSG00000001773		9.33982	9.35e-20	1.48e-18		0.289366	0.00352089	0.0174282		GO:0016020//membrane;GO:0005886//plasma membrane;GO:0016021//integral component of membrane;GO:0009986//cell surface;GO:0005887//integral component of plasma membrane;GO:0070062//extracellular exosome	GO:0035609//C-terminal protein deglutamylation;GO:0008152//metabolic process;GO:0006760//folic acid-containing compound metabolic process;GO:0006508//proteolysis	GO:0016805//dipeptidase activity;GO:0004180//carboxypeptidase activity;GO:1904492//Ac-Asp-Glu binding;GO:0004181//metallocarboxypeptidase activity;GO:0008237//metallopeptidase activity;GO:0016787//hydrolase activity;GO:0003824//catalytic activity;GO:0046872//metal ion binding;GO:0008233//peptidase activity;GO:1904493//tetrahydrofolyl-poly(glutamate) polymer binding	K14592//Vitamin digestion and absorption;Metabolic pathways;Alanine, aspartate and glutamate metabolism
Fosl1	ENSMUSG00000024912		1.03219	1.05e-11	1e-10		1.72763	1.6e-68	1.63e-65		GO:0043231//intracellular membrane-bounded organelle;GO:0005829//cytosol;GO:0042734//presynaptic membrane;GO:0005634//nucleus;GO:0043005//neuron projection;GO:0005654//nucleoplasm	GO:0051591//response to cAMP;GO:0042542//response to hydrogen peroxide;GO:0045787//positive regulation of cell cycle;GO:0034097//response to cytokine;GO:0032570//response to progesterone;GO:0006355//regulation of transcription, DNA-templated;GO:0009612//response to mechanical stimulus;GO:0009629//response to gravity;GO:0008285//negative regulation of cell proliferation;GO:0007565//female pregnanc…	GO:0000977//RNA polymerase II regulatory region sequence-specific DNA binding;GO:0003700//transcription factor activity, sequence-specific DNA binding;GO:0003677//DNA binding;GO:0001077//transcriptional activator activity, RNA polymerase II core promoter proximal region sequence-specific binding;GO:0000978//RNA polymerase II core promoter proximal region sequence-specific DNA binding	K04502//HTLV-I infection;Osteoclast differentiation;Wnt signaling pathway
Foxred2	ENSMUSG00000016552		2.04476	8.92e-126	1.22e-123		0.17267	0.0114829	0.0454988		GO:0005783//endoplasmic reticulum;GO:0005788//endoplasmic reticulum lumen	GO:0030433//ubiquitin-dependent ERAD pathway;GO:0055114//oxidation-reduction process	GO:0016491//oxidoreductase activity;GO:0050660//flavin adenine dinucleotide binding	-
Foxs1	ENSMUSG00000074676		0.863694	2.17e-12	2.17e-11		0.93112	3.23e-32	7.38e-30		GO:0005634//nucleus	GO:0030154//cell differentiation;GO:0001568//blood vessel development;GO:0000122//negative regulation of transcription from RNA polymerase II promoter;GO:0050885//neuromuscular process controlling balance;GO:0009653//anatomical structure morphogenesis;GO:0045892//negative regulation of transcription, DNA-templated;GO:0040018//positive regulation of multicellular organism growth;GO:0043433//negati…	GO:0001078//transcriptional repressor activity, RNA polymerase II core promoter proximal region sequence-specific binding;GO:0043565//sequence-specific DNA binding;GO:0003700//transcription factor activity, sequence-specific DNA binding;GO:0003677//DNA binding;GO:0000978//RNA polymerase II core promoter proximal region sequence-specific DNA binding	-
Fpgt	ENSMUSG00000053870		0.664295	1.23e-13	1.37e-12		0.251653	9.35e-05	0.000822146		GO:0005737//cytoplasm	-	GO:0047341//fucose-1-phosphate guanylyltransferase activity;GO:0005525//GTP binding;GO:0016779//nucleotidyltransferase activity;GO:0016772//transferase activity, transferring phosphorus-containing groups;GO:0016740//transferase activity;GO:0000166//nucleotide binding	K00976//Amino sugar and nucleotide sugar metabolism;Fructose and mannose metabolism;Metabolic pathways
Frmd4a	ENSMUSG00000026657		0.416924	0.000746953	0.00274466		0.775666	3.04e-25	4.53e-23		GO:0005923//bicellular tight junction;GO:0005912//adherens junction;GO:0005856//cytoskeleton;GO:0005737//cytoplasm;GO:0030054//cell junction	GO:0090162//establishment of epithelial cell polarity	GO:0030674//protein binding, bridging	-
Frrs1	ENSMUSG00000033386		0.356901	0.00684813	0.0201081		0.374368	0.000203242	0.00159335		GO:0016021//integral component of membrane;GO:0016020//membrane	GO:0055114//oxidation-reduction process	-	-
Fryl	ENSMUSG00000070733		0.302273	0.00578877	0.0173167		0.19506	0.00602662	0.0270395		GO:0030427//site of polarized growth;GO:0005938//cell cortex	GO:0031175//neuron projection development;GO:0000902//cell morphogenesis;GO:0090527//actin filament reorganization	-	-
G0s2	ENSMUSG00000009633		3.13217	2.31e-07	1.46e-06		1.95773	2.41e-19	2.08e-17		GO:0005739//mitochondrion;GO:0016021//integral component of membrane;GO:0016020//membrane	GO:2001238//positive regulation of extrinsic apoptotic signaling pathway;GO:0006915//apoptotic process;GO:0097191//extrinsic apoptotic signaling pathway	-	-
Galc	ENSMUSG00000021003		0.223225	0.0101026	0.0283132		0.272465	0.00133073	0.00785947		GO:0070062//extracellular exosome;GO:0005739//mitochondrion;GO:0005764//lysosome	GO:0016042//lipid catabolic process;GO:0006629//lipid metabolic process;GO:0006665//sphingolipid metabolic process;GO:0006683//galactosylceramide catabolic process;GO:0008152//metabolic process	GO:0016787//hydrolase activity;GO:0004336//galactosylceramidase activity;GO:0016798//hydrolase activity, acting on glycosyl bonds	K01202//Metabolic pathways;Lysosome;Sphingolipid metabolism
Gas7	ENSMUSG00000033066		0.776937	2.79e-35	8.11e-34		0.193526	0.000180883	0.00144032		-	-	-	-
Gcnt2	ENSMUSG00000021360		0.399221	9.56e-07	5.61e-06		0.281874	0.000104548	0.000900499		GO:0016020//membrane;GO:0016021//integral component of membrane;GO:0005794//Golgi apparatus;GO:0000139//Golgi membrane	GO:0006486//protein glycosylation;GO:0010718//positive regulation of epithelial to mesenchymal transition;GO:0051897//positive regulation of protein kinase B signaling;GO:0036438//maintenance of lens transparency;GO:0070374//positive regulation of ERK1 and ERK2 cascade;GO:0010608//posttranscriptional regulation of gene expression;GO:0008284//positive regulation of cell proliferation;GO:0030335//p…	GO:0008109//N-acetyllactosaminide beta-1,6-N-acetylglucosaminyltransferase activity;GO:0016740//transferase activity;GO:0016757//transferase activity, transferring glycosyl groups;GO:0008375//acetylglucosaminyltransferase activity	K00742//Metabolic pathways;Glycosphingolipid biosynthesis - lacto and neolacto series
Gda	ENSMUSG00000058624		3.37686	0	0		0.136505	0.00358502	0.0176704		GO:0070062//extracellular exosome	GO:0046098//guanine metabolic process;GO:0006147//guanine catabolic process	GO:0016787//hydrolase activity;GO:0046872//metal ion binding;GO:0016810//hydrolase activity, acting on carbon-nitrogen (but not peptide) bonds;GO:0005515//protein binding;GO:0008892//guanine deaminase activity;GO:0008270//zinc ion binding	K01487//Purine metabolism;Metabolic pathways
Gimap5	ENSMUSG00000043505		7.59336	6.52e-10	5.36e-09		1.20177	7.42e-07	1.16e-05		GO:0016021//integral component of membrane;GO:0016020//membrane;GO:0005764//lysosome;GO:0005741//mitochondrial outer membrane;GO:0005739//mitochondrion	-	GO:0005525//GTP binding;GO:0000166//nucleotide binding;GO:0005515//protein binding	-
Gm10425	ENSMUSG00000097081		1.28509	0.00194315	0.00654189		1.13052	3.45e-05	0.00034697		-	-	-	-
Gm10855	ENSMUSG00000075538		1.01602	0.000215243	0.000876881		0.506492	0.00883896	0.0367879		-	-	-	-
Gm14005	ENSMUSG00000074813		0.695456	0.000127607	0.000540601		0.667178	2.41e-06	3.27e-05		-	-	-	-
Gm14636	ENSMUSG00000073274		0.577253	0.0123583	0.0337277		0.915453	1.71e-08	3.79e-07		-	-	-	-
Gm15958	ENSMUSG00000085055		2.0178	5.18e-46	2.01e-44		0.266084	0.00694159	0.0303374		-	-	-	-
Gm19514	ENSMUSG00000108478		4.65692	0.000513174	0.00194776		1.22617	0.010621	0.0427051		-	-	-	-
Gm28119	ENSMUSG00000100158		0.526597	2.68e-05	0.000127097		0.797713	2.13e-14	1.14e-12		-	-	-	-
Gm32647	ENSMUSG00000108532		3.07111	8.27e-37	2.53e-35		0.400156	0.00435834	0.020794		-	-	-	-
Gm340	ENSMUSG00000090673		0.393492	2.21e-06	1.24e-05		0.252705	0.000525793	0.00357786		-	-	-	-
Gm38399	ENSMUSG00000090399		0.712807	0.0045492	0.0139635		0.735396	0.000157496	0.00128368		-	-	-	-
Gm4070	ENSMUSG00000078606		0.426422	0.00627633	0.018621		0.57409	2.54e-09	6.52e-08		GO:0005737//cytoplasm;GO:0005634//nucleus;GO:0005829//cytosol	-	GO:0005525//GTP binding;GO:0000166//nucleotide binding	-
Gm42793	ENSMUSG00000105954		4.42423	0.00127043	0.00444856		1.35608	0.00713532	0.0309923		-	-	-	-
Gm43010	ENSMUSG00000104571		0.932072	0.00262465	0.00855911		0.667612	3.17e-05	0.000322429		-	-	-	-
Gm6634	ENSMUSG00000097252		0.805856	2.64e-12	2.63e-11		0.799426	1.71e-18	1.4e-16		-	-	-	-
Gm8113	ENSMUSG00000089901		0.752902	2.01e-09	1.57e-08		1.23091	2.52e-48	1.36e-45		GO:0016021//integral component of membrane;GO:0016020//membrane	-	-	-
Gm8995	ENSMUSG00000063286		0.743426	1.62e-06	9.23e-06		0.886442	2.18e-24	2.9e-22		-	-	-	-
Gm9790	ENSMUSG00000044330		1.57029	0.000134104	0.000566908		0.679727	0.0109576	0.0438182		-	-	-	-
Gnl3	ENSMUSG00000042354		0.247861	5.32e-06	2.83e-05		0.34258	8.19e-13	3.6e-11		GO:0005615//extracellular space;GO:0016604//nuclear body;GO:0005634//nucleus;GO:0016020//membrane;GO:0005654//nucleoplasm;GO:0005730//nucleolus	GO:0017145//stem cell division;GO:0042254//ribosome biogenesis;GO:0019827//stem cell population maintenance;GO:0032206//positive regulation of telomere maintenance;GO:0033235//positive regulation of protein sumoylation;GO:1902895//positive regulation of pri-miRNA transcription from RNA polymerase II promoter;GO:0008283//cell proliferation;GO:1904816//positive regulation of protein localization to…	GO:0003723//RNA binding;GO:0003924//GTPase activity;GO:0005525//GTP binding;GO:0005515//protein binding;GO:0048027//mRNA 5'-UTR binding;GO:0000166//nucleotide binding	K14538//Ribosome biogenesis in eukaryotes
Gnpda1	ENSMUSG00000052102		0.313732	1.76e-05	8.59e-05		0.187446	0.00185557	0.0102928		GO:0070062//extracellular exosome;GO:0005737//cytoplasm	GO:0006002//fructose 6-phosphate metabolic process;GO:0006044//N-acetylglucosamine metabolic process;GO:0046370//fructose biosynthetic process;GO:0005975//carbohydrate metabolic process;GO:0007340//acrosome reaction;GO:0006043//glucosamine catabolic process;GO:0006041//glucosamine metabolic process;GO:0006091//generation of precursor metabolites and energy	GO:0016787//hydrolase activity;GO:0004342//glucosamine-6-phosphate deaminase activity	K02564//Metabolic pathways;Amino sugar and nucleotide sugar metabolism
Got1	ENSMUSG00000025190		0.549019	3.99e-17	5.55e-16		0.261172	3.7e-06	4.79e-05		GO:0005764//lysosome;GO:0005634//nucleus;GO:0005829//cytosol;GO:0005737//cytoplasm;GO:0043679//axon terminus;GO:0005654//nucleoplasm;GO:0070062//extracellular exosome	GO:0006520//cellular amino acid metabolic process;GO:0019550//glutamate catabolic process to aspartate;GO:0008652//cellular amino acid biosynthetic process;GO:0006533//aspartate catabolic process;GO:0051384//response to glucocorticoid;GO:0006107//oxaloacetate metabolic process;GO:0043648//dicarboxylic acid metabolic process;GO:0006536//glutamate metabolic process;GO:0006114//glycerol biosynthetic…	GO:0004609//phosphatidylserine decarboxylase activity;GO:0031406//carboxylic acid binding;GO:0008483//transaminase activity;GO:0004069//L-aspartate:2-oxoglutarate aminotransferase activity;GO:0047801//L-cysteine:2-oxoglutarate aminotransferase activity;GO:0016740//transferase activity;GO:0030170//pyridoxal phosphate binding;GO:0080130//L-phenylalanine:2-oxoglutarate aminotransferase activity;GO:0…	K14454//Microbial metabolism in diverse environments;2-Oxocarboxylic acid metabolism;Isoquinoline alkaloid biosynthesis;Phenylalanine, tyrosine and tryptophan biosynthesis;Biosynthesis of amino acids;Biosynthesis of secondary metabolites;Alanine, aspartate and glutamate metabolism;Biosynthesis of antibiotics;Arginine biosynthesis;Phenylalanine metabolism;Tyrosine metabolism;Arginine and proline m…
Gpatch4	ENSMUSG00000028069		0.376821	0.000556978	0.00209931		0.285066	0.00308816	0.0156703		-	GO:0002244//hematopoietic progenitor cell differentiation	GO:0003723//RNA binding;GO:0003676//nucleic acid binding	-
Gprc5b	ENSMUSG00000008734		1.76836	8.7e-152	1.54e-149		0.271614	2.9e-07	4.98e-06		GO:0005730//nucleolus;GO:0070062//extracellular exosome;GO:0045121//membrane raft;GO:0043231//intracellular membrane-bounded organelle;GO:0005615//extracellular space;GO:0016021//integral component of membrane;GO:0009986//cell surface;GO:0016020//membrane;GO:0005886//plasma membrane;GO:0005829//cytosol;GO:0005634//nucleus	GO:0001934//positive regulation of protein phosphorylation;GO:0043123//positive regulation of I-kappaB kinase/NF-kappaB signaling;GO:0042593//glucose homeostasis;GO:0090263//positive regulation of canonical Wnt signaling pathway;GO:0032147//activation of protein kinase activity;GO:0061098//positive regulation of protein tyrosine kinase activity;GO:0050729//positive regulation of inflammatory resp…	GO:0004871//signal transducer activity;GO:0004930//G-protein coupled receptor activity;GO:0030295//protein kinase activator activity;GO:0019901//protein kinase binding	-
Gramd4	ENSMUSG00000035900		0.348268	1.09e-08	7.84e-08		0.471274	3.05e-20	2.79e-18		GO:0016021//integral component of membrane;GO:0016020//membrane;GO:0031966//mitochondrial membrane;GO:0005739//mitochondrion	GO:0043280//positive regulation of cysteine-type endopeptidase activity involved in apoptotic process;GO:0006915//apoptotic process	-	-
Grasp	ENSMUSG00000000531		0.644365	2.38e-15	2.97e-14		0.563089	3.42e-16	2.22e-14		GO:0005886//plasma membrane;GO:0016020//membrane;GO:0005641//nuclear envelope lumen;GO:0005737//cytoplasm	GO:0007165//signal transduction;GO:0008104//protein localization;GO:0006886//intracellular protein transport	GO:0030165//PDZ domain binding;GO:0030306//ADP-ribosylation factor binding;GO:0005515//protein binding;GO:0042802//identical protein binding	-
Gria1	ENSMUSG00000020524		3.95973	0	0		0.297573	1.57e-08	3.5e-07		GO:0036477//somatodendritic compartment;GO:0005886//plasma membrane;GO:0032590//dendrite membrane;GO:0043005//neuron projection;GO:0016021//integral component of membrane;GO:0098839//postsynaptic density membrane;GO:0031901//early endosome membrane;GO:0005783//endoplasmic reticulum;GO:0042995//cell projection;GO:0005768//endosome;GO:0008021//synaptic vesicle;GO:0043197//dendritic spine;GO:0044309…	GO:0006811//ion transport;GO:0034220//ion transmembrane transport;GO:0007616//long-term memory;GO:0035235//ionotropic glutamate receptor signaling pathway;GO:0060078//regulation of postsynaptic membrane potential;GO:0007268//chemical synaptic transmission;GO:0060079//excitatory postsynaptic potential;GO:0031623//receptor internalization;GO:0060292//long term synaptic depression;GO:0099566//regula…	GO:0004872//receptor activity;GO:0005515//protein binding;GO:0099583//neurotransmitter receptor activity involved in regulation of postsynaptic cytosolic calcium ion concentration;GO:0004970//ionotropic glutamate receptor activity;GO:0004971//AMPA glutamate receptor activity;GO:0005216//ion channel activity;GO:1904315//transmitter-gated ion channel activity involved in regulation of postsynaptic …	K05197//Glutamatergic synapse;Amphetamine addiction;Retrograde endocannabinoid signaling;Long-term potentiation;Amyotrophic lateral sclerosis (ALS);Dopaminergic synapse;Long-term depression;Circadian entrainment;cAMP signaling pathway;Neuroactive ligand-receptor interaction;Nicotine addiction
Grwd1	ENSMUSG00000053801		0.248579	0.000472935	0.00180834		0.424595	5.39e-11	1.88e-09		GO:0005730//nucleolus;GO:0005694//chromosome;GO:0043234//protein complex;GO:0005829//cytosol;GO:0005634//nucleus	GO:0006334//nucleosome assembly;GO:0006260//DNA replication;GO:0006337//nucleosome disassembly	GO:0042393//histone binding;GO:0003682//chromatin binding;GO:0003723//RNA binding;GO:0003688//DNA replication origin binding	-
Gsto1	ENSMUSG00000025068		0.466542	6.27e-16	8.13e-15		0.292289	1.29e-08	2.93e-07		GO:0005829//cytosol;GO:0005737//cytoplasm;GO:0070062//extracellular exosome	GO:0010880//regulation of release of sequestered calcium ion into cytosol by sarcoplasmic reticulum;GO:0009407//toxin catabolic process;GO:0098869//cellular oxidant detoxification;GO:0019852//L-ascorbic acid metabolic process;GO:0008152//metabolic process;GO:0055114//oxidation-reduction process;GO:0060316//positive regulation of ryanodine-sensitive calcium-release channel activity;GO:0071243//cel…	GO:0004364//glutathione transferase activity;GO:0016740//transferase activity;GO:0016491//oxidoreductase activity;GO:0050610//methylarsonate reductase activity;GO:0045174//glutathione dehydrogenase (ascorbate) activity	K00799//Chemical carcinogenesis;Glutathione metabolism;Metabolism of xenobiotics by cytochrome P450;Drug metabolism - cytochrome P450
Gzme	ENSMUSG00000022156		1.83283	0.0152526	0.0405531		1.18337	0.0094309	0.0388433		GO:0030141//secretory granule;GO:0016020//membrane	GO:0006508//proteolysis;GO:0019835//cytolysis	GO:0016787//hydrolase activity;GO:0008233//peptidase activity;GO:0008236//serine-type peptidase activity;GO:0004252//serine-type endopeptidase activity	-
H2afj	ENSMUSG00000060032		0.373139	1.22e-05	6.12e-05		0.239123	0.000111649	0.000950066		GO:0005694//chromosome;GO:0070062//extracellular exosome;GO:0000786//nucleosome;GO:0005634//nucleus;GO:0000790//nuclear chromatin	GO:0006342//chromatin silencing	GO:0003677//DNA binding;GO:0046982//protein heterodimerization activity	K11251//Alcoholism;Systemic lupus erythematosus
Havcr2	ENSMUSG00000020399		2.32416	9e-16	1.16e-14		0.954356	8.32e-14	4.13e-12		GO:0001772//immunological synapse;GO:0070062//extracellular exosome;GO:0016021//integral component of membrane;GO:0009986//cell surface;GO:0030054//cell junction;GO:0005769//early endosome;GO:0005886//plasma membrane;GO:0016020//membrane;GO:0005576//extracellular region	GO:0045089//positive regulation of innate immune response;GO:0070374//positive regulation of ERK1 and ERK2 cascade;GO:0032689//negative regulation of interferon-gamma production;GO:0002652//regulation of tolerance induction dependent upon immune response;GO:0032712//negative regulation of interleukin-3 production;GO:0032687//negative regulation of interferon-alpha production;GO:0071656//negative …	GO:0046872//metal ion binding;GO:0005515//protein binding	-
Heatr1	ENSMUSG00000050244		0.319384	6.16e-05	0.000275575		0.402048	1.09e-12	4.74e-11		GO:0016020//membrane;GO:0005730//nucleolus;GO:0005739//mitochondrion;GO:0034455//t-UTP complex;GO:0016021//integral component of membrane;GO:0032040//small-subunit processome;GO:0001650//fibrillar center;GO:0030686//90S preribosome	GO:0045943//positive regulation of transcription from RNA polymerase I promoter;GO:2000234//positive regulation of rRNA processing;GO:0000462//maturation of SSU-rRNA from tricistronic rRNA transcript (SSU-rRNA, 5.8S rRNA, LSU-rRNA)	GO:0030515//snoRNA binding;GO:0003723//RNA binding	K14550//Ribosome biogenesis in eukaryotes
Hectd1	ENSMUSG00000035247		0.276753	1.88e-06	1.06e-05		0.291846	1.1e-09	3.02e-08		GO:0005737//cytoplasm	GO:0060707//trophoblast giant cell differentiation;GO:0003170//heart valve development;GO:0001892//embryonic placenta development;GO:0051865//protein autoubiquitination;GO:0016567//protein ubiquitination;GO:0003281//ventricular septum development;GO:0001779//natural killer cell differentiation;GO:1903077//negative regulation of protein localization to plasma membrane;GO:0001843//neural tube closu…	GO:0016740//transferase activity;GO:0061630//ubiquitin protein ligase activity;GO:0004842//ubiquitin-protein transferase activity;GO:0005515//protein binding;GO:0046872//metal ion binding	-
Heg1	ENSMUSG00000075254		0.53019	1.25e-05	6.23e-05		0.448348	0.00141217	0.00822915		GO:0016020//membrane;GO:0005886//plasma membrane;GO:0030054//cell junction;GO:0009986//cell surface;GO:0016021//integral component of membrane;GO:0005911//cell-cell junction;GO:0009897//external side of plasma membrane	GO:0001944//vasculature development;GO:0007275//multicellular organism development;GO:0001701//in utero embryonic development;GO:0001885//endothelial cell development;GO:0060039//pericardium development;GO:0050878//regulation of body fluid levels;GO:0003281//ventricular septum development;GO:0030324//lung development;GO:0090271//positive regulation of fibroblast growth factor production;GO:004521…	GO:0005509//calcium ion binding;GO:0005515//protein binding	-
Hhip	ENSMUSG00000064325		1.55547	0.000463657	0.00177663		1.69293	2.19e-22	2.4e-20		GO:0005887//integral component of plasma membrane;GO:0005737//cytoplasm;GO:0009986//cell surface;GO:0005576//extracellular region;GO:0016020//membrane;GO:0005886//plasma membrane;GO:0005634//nucleus	GO:0007165//signal transduction;GO:0060441//epithelial tube branching involved in lung morphogenesis;GO:0009953//dorsal/ventral pattern formation;GO:0007405//neuroblast proliferation;GO:0048705//skeletal system morphogenesis;GO:0040036//regulation of fibroblast growth factor receptor signaling pathway;GO:0007224//smoothened signaling pathway;GO:0016525//negative regulation of angiogenesis;GO:0043…	GO:0046872//metal ion binding;GO:0003824//catalytic activity;GO:0005515//protein binding;GO:0008270//zinc ion binding;GO:0097108//hedgehog family protein binding	K06231//Basal cell carcinoma;cAMP signaling pathway;Pathways in cancer;Hedgehog signaling pathway
Hhipl1	ENSMUSG00000021260		3.00593	7.54e-164	1.43e-161		0.4004	6.59e-10	1.9e-08		GO:0005576//extracellular region;GO:0016020//membrane	GO:0006898//receptor-mediated endocytosis	GO:0005044//scavenger receptor activity;GO:0003824//catalytic activity	-
Hipk1	ENSMUSG00000008730		1.03388	6.6e-50	2.82e-48		0.327914	3.25e-09	8.2e-08		GO:0005829//cytosol;GO:0005634//nucleus;GO:0005737//cytoplasm;GO:0016607//nuclear speck;GO:0016605//PML body;GO:0005654//nucleoplasm;GO:0005813//centrosome	GO:0043388//positive regulation of DNA binding;GO:0006468//protein phosphorylation;GO:0030182//neuron differentiation;GO:0010842//retina layer formation;GO:0060235//lens induction in camera-type eye;GO:0006355//regulation of transcription, DNA-templated;GO:0000122//negative regulation of transcription from RNA polymerase II promoter;GO:0048596//embryonic camera-type eye morphogenesis;GO:0042771//…	GO:0004672//protein kinase activity;GO:0016301//kinase activity;GO:0000166//nucleotide binding;GO:0004674//protein serine/threonine kinase activity;GO:0005515//protein binding;GO:0005524//ATP binding;GO:0003714//transcription corepressor activity;GO:0016740//transferase activity	-
Hipk2	ENSMUSG00000061436		1.53604	4.34e-12	4.26e-11		0.421066	0.0111178	0.0443185		GO:0016605//PML body;GO:0005634//nucleus;GO:0005737//cytoplasm;GO:0016604//nuclear body;GO:0090575//RNA polymerase II transcription factor complex	GO:0018107//peptidyl-threonine phosphorylation;GO:0043388//positive regulation of DNA binding;GO:0007179//transforming growth factor beta receptor signaling pathway;GO:0006366//transcription from RNA polymerase II promoter;GO:0006468//protein phosphorylation;GO:0008344//adult locomotory behavior;GO:0006915//apoptotic process;GO:0030182//neuron differentiation;GO:0000122//negative regulation of tr…	GO:0001105//RNA polymerase II transcription coactivator activity;GO:0004674//protein serine/threonine kinase activity;GO:0005524//ATP binding;GO:0005515//protein binding;GO:0046790//virion binding;GO:0003677//DNA binding;GO:0003714//transcription corepressor activity;GO:0016740//transferase activity;GO:0004672//protein kinase activity;GO:0016301//kinase activity;GO:0001102//RNA polymerase II acti…	-
Hk2	ENSMUSG00000000628		0.267951	0.000687175	0.00254443		0.83185	9.23e-52	6.51e-49		GO:0005739//mitochondrion;GO:0005741//mitochondrial outer membrane;GO:0016020//membrane;GO:0005829//cytosol	GO:0072655//establishment of protein localization to mitochondrion;GO:0072656//maintenance of protein location in mitochondrion;GO:0008152//metabolic process;GO:0006096//glycolytic process;GO:2000378//negative regulation of reactive oxygen species metabolic process;GO:0005975//carbohydrate metabolic process;GO:1990830//cellular response to leukemia inhibitory factor;GO:0046835//carbohydrate phosp…	GO:0004396//hexokinase activity;GO:0008865//fructokinase activity;GO:0016773//phosphotransferase activity, alcohol group as acceptor;GO:0016740//transferase activity;GO:0005515//protein binding;GO:0005524//ATP binding;GO:0003824//catalytic activity;GO:0019158//mannokinase activity;GO:0016301//kinase activity;GO:0004340//glucokinase activity;GO:0000166//nucleotide binding;GO:0005536//glucose bindi…	K00844//Amino sugar and nucleotide sugar metabolism;Biosynthesis of secondary metabolites;Butirosin and neomycin biosynthesis;Microbial metabolism in diverse environments;Galactose metabolism;HIF-1 signaling pathway;Fructose and mannose metabolism;Glycolysis / Gluconeogenesis;Insulin signaling pathway;Streptomycin biosynthesis;Central carbon metabolism in cancer;Carbohydrate digestion and absorpt…
Hlf	ENSMUSG00000003949		0.789078	7.98e-11	7.11e-10		0.327611	0.000901735	0.00566585		GO:0005634//nucleus	GO:0035914//skeletal muscle cell differentiation;GO:0048511//rhythmic process;GO:0006366//transcription from RNA polymerase II promoter;GO:0045944//positive regulation of transcription from RNA polymerase II promoter;GO:0006351//transcription, DNA-templated;GO:0006355//regulation of transcription, DNA-templated	GO:0001077//transcriptional activator activity, RNA polymerase II core promoter proximal region sequence-specific binding;GO:0003677//DNA binding;GO:0001228//transcriptional activator activity, RNA polymerase II transcription regulatory region sequence-specific binding;GO:0003700//transcription factor activity, sequence-specific DNA binding;GO:0000977//RNA polymerase II regulatory region sequence…	K09057//Circadian rhythm - fly
Hmga1	ENSMUSG00000046711		1.87361	6.24e-94	5.96e-92		0.71769	2.02e-37	6.09e-35		GO:0090575//RNA polymerase II transcription factor complex;GO:0005634//nucleus;GO:0005925//focal adhesion;GO:0000785//chromatin;GO:0035985//senescence-associated heterochromatin focus;GO:0005694//chromosome	GO:0045893//positive regulation of transcription, DNA-templated;GO:0045892//negative regulation of transcription, DNA-templated;GO:0090402//oncogene-induced cell senescence;GO:0006284//base-excision repair;GO:0006366//transcription from RNA polymerase II promoter;GO:0045944//positive regulation of transcription from RNA polymerase II promoter;GO:0007283//spermatogenesis;GO:0008285//negative regul…	GO:0019899//enzyme binding;GO:0046965//retinoid X receptor binding;GO:0051575//5'-deoxyribose-5-phosphate lyase activity;GO:0030374//ligand-dependent nuclear receptor transcription coactivator activity;GO:0008134//transcription factor binding;GO:0001077//transcriptional activator activity, RNA polymerase II core promoter proximal region sequence-specific binding;GO:0003677//DNA binding;GO:0003906…	-
Hmga1b	ENSMUSG00000078249		1.97378	4.43e-118	5.55e-116		0.66886	1.3e-28	2.43e-26		GO:0005634//nucleus;GO:0090575//RNA polymerase II transcription factor complex;GO:0005694//chromosome;GO:0000785//chromatin;GO:0005925//focal adhesion;GO:0035985//senescence-associated heterochromatin focus	GO:0006351//transcription, DNA-templated;GO:2000774//positive regulation of cellular senescence;GO:0006355//regulation of transcription, DNA-templated;GO:0035986//senescence-associated heterochromatin focus assembly;GO:0006284//base-excision repair;GO:0007283//spermatogenesis;GO:0008285//negative regulation of cell proliferation;GO:0006366//transcription from RNA polymerase II promoter;GO:0045944…	GO:0003682//chromatin binding;GO:0001205//transcriptional activator activity, RNA polymerase II distal enhancer sequence-specific binding;GO:0003680//AT DNA binding;GO:0042975//peroxisome proliferator activated receptor binding;GO:0001158//enhancer sequence-specific DNA binding;GO:0008134//transcription factor binding;GO:0030374//ligand-dependent nuclear receptor transcription coactivator activit…	-
Hmga2	ENSMUSG00000056758		1.52428	3.68e-60	1.96e-58		1.45612	3.06e-143	4.96e-139		GO:0000785//chromatin;GO:0035985//senescence-associated heterochromatin focus;GO:0000228//nuclear chromosome;GO:0005634//nucleus;GO:0071141//SMAD protein complex;GO:0032993//protein-DNA complex	GO:0007049//cell cycle;GO:0035987//endodermal cell differentiation;GO:0035988//chondrocyte proliferation;GO:0001837//epithelial to mesenchymal transition;GO:2001033//negative regulation of double-strand break repair via nonhomologous end joining;GO:0071864//positive regulation of cell proliferation in bone marrow;GO:0051301//cell division;GO:0003131//mesodermal-endodermal cell signaling;GO:200102…	GO:0044212//transcription regulatory region DNA binding;GO:0003677//DNA binding;GO:0035500//MH2 domain binding;GO:0003680//AT DNA binding;GO:0035497//cAMP response element binding;GO:0008301//DNA binding, bending;GO:0004677//DNA-dependent protein kinase activity;GO:0001047//core promoter binding;GO:0035501//MH1 domain binding;GO:0003906//DNA-(apurinic or apyrimidinic site) lyase activity;GO:00055…	K09283//MicroRNAs in cancer;Transcriptional misregulation in cancer
Hp	ENSMUSG00000031722		6.03418	1.84e-264	6.86e-262		0.323769	2.86e-06	3.8e-05		GO:0072562//blood microparticle;GO:0070062//extracellular exosome;GO:0031838//haptoglobin-hemoglobin complex;GO:0005615//extracellular space;GO:0005576//extracellular region	GO:0051354//negative regulation of oxidoreductase activity;GO:0042742//defense response to bacterium;GO:0002376//immune system process;GO:0098869//cellular oxidant detoxification;GO:0010942//positive regulation of cell death;GO:2000296//negative regulation of hydrogen peroxide catabolic process;GO:0042542//response to hydrogen peroxide;GO:0007219//Notch signaling pathway;GO:0006953//acute-phase r…	GO:0030492//hemoglobin binding;GO:0004252//serine-type endopeptidase activity;GO:0016209//antioxidant activity	-
Hsd11b1	ENSMUSG00000016194		1.78318	9.78e-21	1.62e-19		1.20335	3.32e-24	4.28e-22		GO:0005789//endoplasmic reticulum membrane;GO:0016021//integral component of membrane;GO:0016020//membrane;GO:0005783//endoplasmic reticulum	GO:0055114//oxidation-reduction process;GO:0008202//steroid metabolic process;GO:0006629//lipid metabolic process;GO:0030324//lung development	GO:0016491//oxidoreductase activity;GO:0070524//11-beta-hydroxysteroid dehydrogenase (NADP+) activity;GO:0003845//11-beta-hydroxysteroid dehydrogenase [NAD(P)] activity	K15680//Steroid hormone biosynthesis;Chemical carcinogenesis;Metabolism of xenobiotics by cytochrome P450;Metabolic pathways
Htr1b	ENSMUSG00000049511		1.21089	0.00760838	0.02208		1.86205	4.38e-13	2e-11		GO:0005887//integral component of plasma membrane;GO:0005886//plasma membrane;GO:0016020//membrane;GO:0016021//integral component of membrane;GO:0005737//cytoplasm	GO:0007205//protein kinase C-activating G-protein coupled receptor signaling pathway;GO:0032229//negative regulation of synaptic transmission, GABAergic;GO:0007610//behavior;GO:0071312//cellular response to alkaloid;GO:0042310//vasoconstriction;GO:0042756//drinking behavior;GO:0007198//adenylate cyclase-inhibiting serotonin receptor signaling pathway;GO:0035690//cellular response to drug;GO:00071…	GO:0004871//signal transducer activity;GO:0008144//drug binding;GO:0051378//serotonin binding;GO:0030594//neurotransmitter receptor activity;GO:0004930//G-protein coupled receptor activity;GO:0004993//G-protein coupled serotonin receptor activity	K04153//Neuroactive ligand-receptor interaction;cAMP signaling pathway;Serotonergic synapse
Idh3a	ENSMUSG00000032279		0.190021	0.000529353	0.0020046		0.199074	6.43e-05	0.000593543		GO:0043209//myelin sheath;GO:0005739//mitochondrion;GO:0005634//nucleus	GO:0055114//oxidation-reduction process;GO:0006099//tricarboxylic acid cycle	GO:0004449//isocitrate dehydrogenase (NAD+) activity;GO:0000287//magnesium ion binding;GO:0046872//metal ion binding;GO:0051287//NAD binding;GO:0016616//oxidoreductase activity, acting on the CH-OH group of donors, NAD or NADP as acceptor;GO:0016491//oxidoreductase activity	K00030//Carbon metabolism;Biosynthesis of amino acids;Microbial metabolism in diverse environments;2-Oxocarboxylic acid metabolism;Biosynthesis of antibiotics;Metabolic pathways;Biosynthesis of secondary metabolites;Citrate cycle (TCA cycle)
Ido2	ENSMUSG00000031549		3.22769	6.18e-05	0.000276122		1.33109	0.000375438	0.00267939		GO:0005737//cytoplasm	GO:0055114//oxidation-reduction process;GO:0019441//tryptophan catabolic process to kynurenine;GO:0002376//immune system process;GO:0006569//tryptophan catabolic process	GO:0016491//oxidoreductase activity;GO:0051213//dioxygenase activity;GO:0004833//tryptophan 2,3-dioxygenase activity;GO:0046872//metal ion binding;GO:0033754//indoleamine 2,3-dioxygenase activity;GO:0020037//heme binding	K00463//African trypanosomiasis;Tryptophan metabolism;Metabolic pathways
Ier5l	ENSMUSG00000089762		1.04015	4.49e-43	1.6e-41		0.172955	0.00484224	0.0226367		-	-	-	-
Ifi204	ENSMUSG00000073489		0.681061	2.09e-23	3.96e-22		0.472206	1.66e-15	9.98e-14		GO:0005730//nucleolus;GO:0016607//nuclear speck;GO:0042405//nuclear inclusion body;GO:0005737//cytoplasm;GO:0005654//nucleoplasm;GO:0016020//membrane;GO:0005829//cytosol;GO:0005634//nucleus	GO:0007275//multicellular organism development;GO:0000122//negative regulation of transcription from RNA polymerase II promoter;GO:0042771//intrinsic apoptotic signaling pathway in response to DNA damage by p53 class mediator;GO:0045669//positive regulation of osteoblast differentiation;GO:0048839//inner ear development;GO:0006351//transcription, DNA-templated;GO:0035458//cellular response to int…	GO:0001047//core promoter binding;GO:0001078//transcriptional repressor activity, RNA polymerase II core promoter proximal region sequence-specific binding;GO:0003690//double-stranded DNA binding;GO:0000978//RNA polymerase II core promoter proximal region sequence-specific DNA binding;GO:0003712//transcription cofactor activity;GO:0008134//transcription factor binding;GO:0003723//RNA binding;GO:0…	-
Ifi207	ENSMUSG00000073490		4.11915	3.66e-174	7.41e-172		0.592097	7.63e-14	3.82e-12		GO:0005730//nucleolus;GO:0005634//nucleus;GO:0005829//cytosol;GO:0016020//membrane	GO:0000122//negative regulation of transcription from RNA polymerase II promoter	GO:0000978//RNA polymerase II core promoter proximal region sequence-specific DNA binding;GO:0042802//identical protein binding;GO:0003690//double-stranded DNA binding;GO:0008134//transcription factor binding;GO:0003723//RNA binding;GO:0001047//core promoter binding;GO:0001078//transcriptional repressor activity, RNA polymerase II core promoter proximal region sequence-specific binding	-
Ifi208	ENSMUSG00000066677		3.74132	1.68e-28	3.85e-27		1.62459	2.35e-23	2.85e-21		GO:0016020//membrane;GO:0005634//nucleus;GO:0005829//cytosol;GO:0005730//nucleolus	GO:0000122//negative regulation of transcription from RNA polymerase II promoter	GO:0001078//transcriptional repressor activity, RNA polymerase II core promoter proximal region sequence-specific binding;GO:0001047//core promoter binding;GO:0003723//RNA binding;GO:0008134//transcription factor binding;GO:0042802//identical protein binding;GO:0003690//double-stranded DNA binding;GO:0000978//RNA polymerase II core promoter proximal region sequence-specific DNA binding	-
Ifi209	ENSMUSG00000043263		2.48997	7.38e-06	3.84e-05		1.71926	8.28e-10	2.33e-08		GO:0016020//membrane;GO:0005829//cytosol;GO:0005634//nucleus;GO:0005730//nucleolus	GO:0035458//cellular response to interferon-beta;GO:0000122//negative regulation of transcription from RNA polymerase II promoter	GO:0003690//double-stranded DNA binding;GO:0042802//identical protein binding;GO:0000978//RNA polymerase II core promoter proximal region sequence-specific DNA binding;GO:0001047//core promoter binding;GO:0001078//transcriptional repressor activity, RNA polymerase II core promoter proximal region sequence-specific binding;GO:0003723//RNA binding;GO:0008134//transcription factor binding	-
Ifi211	ENSMUSG00000026536		0.626509	4.97e-12	4.86e-11		0.423206	4.42e-09	1.09e-07		GO:0016607//nuclear speck;GO:0005730//nucleolus;GO:0005634//nucleus;GO:0005829//cytosol;GO:0034399//nuclear periphery;GO:0016020//membrane	GO:0000122//negative regulation of transcription from RNA polymerase II promoter;GO:0006351//transcription, DNA-templated;GO:0006355//regulation of transcription, DNA-templated	GO:0003690//double-stranded DNA binding;GO:0042802//identical protein binding;GO:0000978//RNA polymerase II core promoter proximal region sequence-specific DNA binding;GO:0001078//transcriptional repressor activity, RNA polymerase II core promoter proximal region sequence-specific binding;GO:0001047//core promoter binding;GO:0008134//transcription factor binding;GO:0003723//RNA binding	-
Ifi213	ENSMUSG00000073491		3.01693	0.000153846	0.000643581		1.50468	2.57e-05	0.000269017		GO:0005730//nucleolus;GO:0005634//nucleus;GO:0005829//cytosol;GO:0016020//membrane	GO:0000122//negative regulation of transcription from RNA polymerase II promoter	GO:0003723//RNA binding;GO:0008134//transcription factor binding;GO:0001078//transcriptional repressor activity, RNA polymerase II core promoter proximal region sequence-specific binding;GO:0001047//core promoter binding;GO:0000978//RNA polymerase II core promoter proximal region sequence-specific DNA binding;GO:0042802//identical protein binding;GO:0003690//double-stranded DNA binding	-
Ifi47	ENSMUSG00000078920		0.29149	0.0011793	0.0041597		0.312056	2.05e-05	0.000221959		GO:0005783//endoplasmic reticulum;GO:0016020//membrane;GO:0005789//endoplasmic reticulum membrane	GO:0035458//cellular response to interferon-beta;GO:0006952//defense response	GO:0003924//GTPase activity;GO:0005525//GTP binding	K17072//TNF signaling pathway
Il12rb1	ENSMUSG00000000791		2.18779	2.86e-13	3.1e-12		0.492658	0.00955508	0.039275		GO:0016021//integral component of membrane;GO:0016020//membrane;GO:0005886//plasma membrane;GO:0042022//interleukin-12 receptor complex;GO:0009897//external side of plasma membrane;GO:0072536//interleukin-23 receptor complex	GO:0032729//positive regulation of interferon-gamma production;GO:0018108//peptidyl-tyrosine phosphorylation;GO:0042104//positive regulation of activated T cell proliferation;GO:0002827//positive regulation of T-helper 1 type immune response;GO:0035722//interleukin-12-mediated signaling pathway;GO:0002230//positive regulation of defense response to virus by host;GO:0038155//interleukin-23-mediate…	GO:0042020//interleukin-23 receptor activity;GO:0005515//protein binding;GO:0005143//interleukin-12 receptor binding;GO:0016517//interleukin-12 receptor activity;GO:0042019//interleukin-23 binding;GO:0019955//cytokine binding	K05063//Cytokine-cytokine receptor interaction;Jak-STAT signaling pathway;Inflammatory bowel disease (IBD)
Il18rap	ENSMUSG00000026068		0.648105	6.02e-05	0.000269554		1.43921	5.11e-49	2.86e-46		GO:0016020//membrane;GO:0005886//plasma membrane;GO:0016021//integral component of membrane	GO:0042119//neutrophil activation;GO:0035655//interleukin-18-mediated signaling pathway;GO:0035744//T-helper 1 cell cytokine production;GO:0008283//cell proliferation;GO:0032635//interleukin-6 production;GO:0070301//cellular response to hydrogen peroxide;GO:0045954//positive regulation of natural killer cell mediated cytotoxicity;GO:0032609//interferon-gamma production;GO:0071351//cellular respon…	GO:0004908//interleukin-1 receptor activity	K05174//Cytokine-cytokine receptor interaction;Inflammatory bowel disease (IBD)
Il1rap	ENSMUSG00000022514		0.974813	9.19e-41	3.1e-39		0.303994	1.99e-07	3.52e-06		GO:0016020//membrane;GO:0005576//extracellular region;GO:0005886//plasma membrane;GO:0016021//integral component of membrane;GO:0005615//extracellular space	GO:0051092//positive regulation of NF-kappaB transcription factor activity;GO:0032754//positive regulation of interleukin-5 production;GO:2000778//positive regulation of interleukin-6 secretion;GO:0002376//immune system process;GO:0019221//cytokine-mediated signaling pathway;GO:0032736//positive regulation of interleukin-13 production;GO:0038172//interleukin-33-mediated signaling pathway;GO:00069…	GO:0004908//interleukin-1 receptor activity;GO:1990782//protein tyrosine kinase binding;GO:0002114//interleukin-33 receptor activity;GO:0004871//signal transducer activity;GO:0005515//protein binding	K04723//Cytokine-cytokine receptor interaction;Inflammatory mediator regulation of TRP channels;Apoptosis
Il6ra	ENSMUSG00000027947		0.45242	9.11e-09	6.6e-08		0.298541	7.5e-06	9.03e-05		GO:0016324//apical plasma membrane;GO:0005896//interleukin-6 receptor complex;GO:0009986//cell surface;GO:0005615//extracellular space;GO:0016021//integral component of membrane;GO:0070110//ciliary neurotrophic factor receptor complex;GO:0005576//extracellular region;GO:0016020//membrane	GO:0050731//positive regulation of peptidyl-tyrosine phosphorylation;GO:0032722//positive regulation of chemokine production;GO:0008284//positive regulation of cell proliferation;GO:0032966//negative regulation of collagen biosynthetic process;GO:0034097//response to cytokine;GO:0043410//positive regulation of MAPK cascade;GO:0031018//endocrine pancreas development;GO:0019221//cytokine-mediated s…	GO:0005138//interleukin-6 receptor binding;GO:0019981//interleukin-6 binding;GO:0042803//protein homodimerization activity;GO:0004897//ciliary neurotrophic factor receptor activity;GO:0070119//ciliary neurotrophic factor binding;GO:0019899//enzyme binding;GO:0004915//interleukin-6 receptor activity;GO:0004896//cytokine receptor activity	K05055//Jak-STAT signaling pathway;Hematopoietic cell lineage;Cytokine-cytokine receptor interaction;Non-alcoholic fatty liver disease (NAFLD);HIF-1 signaling pathway;PI3K-Akt signaling pathway
Imp3	ENSMUSG00000032288		0.582073	3.65e-09	2.77e-08		0.605744	8.76e-18	6.71e-16		GO:0005634//nucleus;GO:0032040//small-subunit processome;GO:0034457//Mpp10 complex;GO:0005622//intracellular;GO:0005730//nucleolus;GO:0030529//intracellular ribonucleoprotein complex	GO:0006364//rRNA processing;GO:0042254//ribosome biogenesis	GO:0030519//snoRNP binding;GO:0003723//RNA binding;GO:0030515//snoRNA binding	K14560//Ribosome biogenesis in eukaryotes
Imp4	ENSMUSG00000026127		0.192672	0.013468	0.0363254		0.31912	2.9e-06	3.84e-05		GO:0005730//nucleolus;GO:0030529//intracellular ribonucleoprotein complex;GO:0032040//small-subunit processome;GO:0005634//nucleus;GO:0001650//fibrillar center;GO:0034457//Mpp10 complex	GO:0006364//rRNA processing;GO:0042254//ribosome biogenesis	GO:0030519//snoRNP binding;GO:0003723//RNA binding;GO:0030515//snoRNA binding;GO:0042134//rRNA primary transcript binding	K14561//Ribosome biogenesis in eukaryotes
Inf2	ENSMUSG00000037679		1.03397	4.29e-52	1.93e-50		0.256131	0.000452972	0.00315506		GO:0048471//perinuclear region of cytoplasm	GO:0030036//actin cytoskeleton organization;GO:0016043//cellular component organization;GO:0090140//regulation of mitochondrial fission	GO:0003779//actin binding;GO:0017048//Rho GTPase binding	-
Inpp4b	ENSMUSG00000037940		1.6378	2.02e-31	5.14e-30		0.277915	0.00493052	0.0229441		GO:0016021//integral component of membrane;GO:0016020//membrane;GO:0005623//cell	GO:0046856//phosphatidylinositol dephosphorylation;GO:0036092//phosphatidylinositol-3-phosphate biosynthetic process;GO:0045671//negative regulation of osteoclast differentiation;GO:0046822//regulation of nucleocytoplasmic transport;GO:0046855//inositol phosphate dephosphorylation;GO:0051896//regulation of protein kinase B signaling;GO:0006874//cellular calcium ion homeostasis;GO:0046850//regulat…	GO:0008289//lipid binding;GO:0034594//phosphatidylinositol trisphosphate phosphatase activity;GO:0016787//hydrolase activity;GO:0034593//phosphatidylinositol bisphosphate phosphatase activity;GO:0034597//phosphatidylinositol-4,5-bisphosphate 4-phosphatase activity;GO:0016316//phosphatidylinositol-3,4-bisphosphate 4-phosphatase activity	K01109//Inositol phosphate metabolism;Metabolic pathways;Phosphatidylinositol signaling system
Insig1	ENSMUSG00000045294		0.510443	3.98e-11	3.63e-10		0.15868	0.00247876	0.0130695		GO:0016021//integral component of membrane;GO:0005789//endoplasmic reticulum membrane;GO:0005783//endoplasmic reticulum;GO:0016020//membrane;GO:0032937//SREBP-SCAP-Insig complex	GO:0042474//middle ear morphogenesis;GO:0060021//palate development;GO:0045717//negative regulation of fatty acid biosynthetic process;GO:0060363//cranial suture morphogenesis;GO:0042472//inner ear morphogenesis;GO:0006991//response to sterol depletion;GO:0006629//lipid metabolic process;GO:1901303//negative regulation of cargo loading into COPII-coated vesicle;GO:0006695//cholesterol biosyntheti…	-	-
Itga10	ENSMUSG00000090210		2.23588	5.09e-45	1.92e-43		0.338442	0.00137847	0.0080739		GO:0016020//membrane;GO:0016021//integral component of membrane;GO:0008305//integrin complex;GO:0034680//integrin alpha10-beta1 complex	GO:0007155//cell adhesion;GO:0007160//cell-matrix adhesion;GO:0007229//integrin-mediated signaling pathway	GO:0098639//collagen binding involved in cell-matrix adhesion	K06586//Focal adhesion;Hypertrophic cardiomyopathy (HCM);Dilated cardiomyopathy;Arrhythmogenic right ventricular cardiomyopathy (ARVC);ECM-receptor interaction;PI3K-Akt signaling pathway;Regulation of actin cytoskeleton
Itga3	ENSMUSG00000001507		0.341875	7.84e-05	0.000343933		0.349247	1.72e-08	3.79e-07		GO:0009897//external side of plasma membrane;GO:0005925//focal adhesion;GO:0070062//extracellular exosome;GO:0043235//receptor complex;GO:0031527//filopodium membrane;GO:0016021//integral component of membrane;GO:0042995//cell projection;GO:0016323//basolateral plasma membrane;GO:0005886//plasma membrane;GO:0034667//integrin alpha3-beta1 complex;GO:0097060//synaptic membrane;GO:0048471//perinucle…	GO:0010976//positive regulation of neuron projection development;GO:0097205//renal filtration;GO:0007507//heart development;GO:0035024//negative regulation of Rho protein signal transduction;GO:0007229//integrin-mediated signaling pathway;GO:0030510//regulation of BMP signaling pathway;GO:0010628//positive regulation of gene expression;GO:0007613//memory;GO:0048333//mesodermal cell differentiatio…	GO:0005518//collagen binding;GO:0002020//protease binding;GO:0046982//protein heterodimerization activity;GO:0043236//laminin binding;GO:0019904//protein domain specific binding;GO:0005515//protein binding;GO:0005178//integrin binding;GO:0001968//fibronectin binding	K05719//Rap1 signaling pathway;Pathways in cancer;Shigellosis;Small cell lung cancer;Axon guidance;Focal adhesion;Toxoplasmosis;Dilated cardiomyopathy;Pathogenic Escherichia coli infection;Regulation of actin cytoskeleton;Hypertrophic cardiomyopathy (HCM);Leukocyte transendothelial migration;Platelet activation;Phagosome;Pertussis;ECM-receptor interaction;PI3K-Akt signaling pathway;Cell adhesion …
Itga5	ENSMUSG00000000555		0.568928	6.63e-08	4.43e-07		0.64216	1.09e-15	6.69e-14		GO:0045202//synapse;GO:0005886//plasma membrane;GO:0032587//ruffle membrane;GO:0016020//membrane;GO:0008305//integrin complex;GO:0005794//Golgi apparatus;GO:0005911//cell-cell junction;GO:0005925//focal adhesion;GO:0031410//cytoplasmic vesicle;GO:0009897//external side of plasma membrane;GO:0030054//cell junction;GO:0005783//endoplasmic reticulum;GO:0009986//cell surface;GO:0016021//integral comp…	GO:0030335//positive regulation of cell migration;GO:0031589//cell-substrate adhesion;GO:0035987//endodermal cell differentiation;GO:0033631//cell-cell adhesion mediated by integrin;GO:0007044//cell-substrate junction assembly;GO:0007159//leukocyte cell-cell adhesion;GO:0035313//wound healing, spreading of epidermal cells;GO:0034113//heterotypic cell-cell adhesion;GO:0010811//positive regulation …	GO:0050839//cell adhesion molecule binding;GO:0005178//integrin binding;GO:0005515//protein binding;GO:0005154//epidermal growth factor receptor binding;GO:0046872//metal ion binding	K03161//Viral myocarditis;Systemic lupus erythematosus;T cell receptor signaling pathway;Asthma;Allograft rejection;NF-kappa B signaling pathway;Intestinal immune network for IgA production;Autoimmune thyroid disease;Malaria;Primary immunodeficiency;Cell adhesion molecules (CAMs);Toxoplasmosis;Cytokine-cytokine receptor interaction
Itga8	ENSMUSG00000026768		0.365568	1.63e-05	7.97e-05		0.331384	1.31e-06	1.91e-05		GO:0009986//cell surface;GO:0016021//integral component of membrane;GO:0043204//perikaryon;GO:0005783//endoplasmic reticulum;GO:0005925//focal adhesion;GO:0032591//dendritic spine membrane;GO:0008305//integrin complex;GO:0005886//plasma membrane;GO:0016020//membrane;GO:0014069//postsynaptic density;GO:0045177//apical part of cell	GO:0007160//cell-matrix adhesion;GO:0007275//multicellular organism development;GO:0030154//cell differentiation;GO:0030511//positive regulation of transforming growth factor beta receptor signaling pathway;GO:0001656//metanephros development;GO:0007420//brain development;GO:0045184//establishment of protein localization;GO:2000721//positive regulation of transcription from RNA polymerase II prom…	GO:0046872//metal ion binding	K06584//Arrhythmogenic right ventricular cardiomyopathy (ARVC);Regulation of actin cytoskeleton;Focal adhesion;Cell adhesion molecules (CAMs);Dilated cardiomyopathy;ECM-receptor interaction;PI3K-Akt signaling pathway;Hypertrophic cardiomyopathy (HCM)
Itgb2	ENSMUSG00000000290		0.540411	0.000880189	0.00319146		0.89564	4.7e-12	1.87e-10		GO:0005886//plasma membrane;GO:0016020//membrane;GO:0016021//integral component of membrane;GO:0009986//cell surface;GO:0008305//integrin complex	GO:0007159//leukocyte cell-cell adhesion;GO:0007568//aging;GO:0051092//positive regulation of NF-kappaB transcription factor activity;GO:0007155//cell adhesion;GO:0030101//natural killer cell activation;GO:0045123//cellular extravasation;GO:0043542//endothelial cell migration;GO:0098609//cell-cell adhesion;GO:0007160//cell-matrix adhesion;GO:0045429//positive regulation of nitric oxide biosynthet…	GO:0050839//cell adhesion molecule binding;GO:0046982//protein heterodimerization activity;GO:0032403//protein complex binding;GO:0004872//receptor activity	K03161//NF-kappa B signaling pathway;Allograft rejection;Viral myocarditis;Systemic lupus erythematosus;T cell receptor signaling pathway;Asthma;Cell adhesion molecules (CAMs);Primary immunodeficiency;Toxoplasmosis;Cytokine-cytokine receptor interaction;Malaria;Autoimmune thyroid disease;Intestinal immune network for IgA production
Itpr3	ENSMUSG00000042644		0.257495	9.05e-05	0.000393414		0.170984	0.00601517	0.0270158		GO:0016020//membrane;GO:0005634//nucleus;GO:0005886//plasma membrane;GO:0005654//nucleoplasm;GO:0005789//endoplasmic reticulum membrane;GO:0005737//cytoplasm;GO:0016021//integral component of membrane;GO:0005783//endoplasmic reticulum;GO:0005730//nucleolus;GO:0005887//integral component of plasma membrane;GO:0043235//receptor complex	GO:0060402//calcium ion transport into cytosol;GO:0060291//long-term synaptic potentiation;GO:0007613//memory;GO:0051209//release of sequestered calcium ion into cytosol;GO:0006810//transport;GO:0050913//sensory perception of bitter taste;GO:0006811//ion transport;GO:0048016//inositol phosphate-mediated signaling;GO:0006816//calcium ion transport;GO:0055085//transmembrane transport;GO:0051592//re…	GO:0005515//protein binding;GO:0005220//inositol 1,4,5-trisphosphate-sensitive calcium-release channel activity;GO:0005509//calcium ion binding;GO:0070679//inositol 1,4,5 trisphosphate binding;GO:0035091//phosphatidylinositol binding;GO:0005216//ion channel activity;GO:0015278//calcium-release channel activity;GO:0005262//calcium channel activity	K04960//Insulin secretion;Retrograde endocannabinoid signaling;Salivary secretion;Oxytocin signaling pathway;Alzheimer's disease;Glucagon signaling pathway;Long-term potentiation;Proteoglycans in cancer;Pancreatic secretion;Calcium signaling pathway;GnRH signaling pathway;Platelet activation;Gap junction;Serotonergic synapse;Renin secretion;Estrogen signaling pathway;cGMP-PKG signaling pathway;Ci…
Itpripl2	ENSMUSG00000095115		0.542846	1.06e-26	2.26e-25		0.397979	1.1e-18	9.03e-17		GO:0016021//integral component of membrane;GO:0016020//membrane	-	-	-
Ivns1abp	ENSMUSG00000023150		0.308068	9.97e-09	7.21e-08		0.308861	4.77e-10	1.41e-08		GO:0015629//actin cytoskeleton;GO:0005737//cytoplasm;GO:0005856//cytoskeleton;GO:0005634//nucleus;GO:0005829//cytosol	GO:2001243//negative regulation of intrinsic apoptotic signaling pathway	GO:0005515//protein binding	K15046//Influenza A
Jade2	ENSMUSG00000020387		1.4932	2.54e-122	3.32e-120		0.304615	1.51e-09	4.04e-08		GO:0000123//histone acetyltransferase complex;GO:0070062//extracellular exosome;GO:0005654//nucleoplasm	GO:0043983//histone H4-K12 acetylation;GO:0016567//protein ubiquitination;GO:0051865//protein autoubiquitination;GO:0043981//histone H4-K5 acetylation;GO:0050767//regulation of neurogenesis;GO:0043966//histone H3 acetylation;GO:0060395//SMAD protein signal transduction;GO:1990138//neuron projection extension;GO:0050769//positive regulation of neurogenesis;GO:0000209//protein polyubiquitination;GO…	GO:0046872//metal ion binding;GO:0005515//protein binding;GO:0061630//ubiquitin protein ligase activity;GO:0016740//transferase activity	-
Jcad	ENSMUSG00000033960		0.484893	1.15e-17	1.65e-16		0.304167	2.64e-08	5.63e-07		GO:0005911//cell-cell junction;GO:0005912//adherens junction;GO:0032587//ruffle membrane;GO:0030054//cell junction;GO:0048471//perinuclear region of cytoplasm	GO:0043410//positive regulation of MAPK cascade;GO:1900748//positive regulation of vascular endothelial growth factor signaling pathway;GO:1903589//positive regulation of blood vessel endothelial cell proliferation involved in sprouting angiogenesis;GO:0090050//positive regulation of cell migration involved in sprouting angiogenesis;GO:1903672//positive regulation of sprouting angiogenesis;GO:000…	-	-
Kat2a	ENSMUSG00000020918		0.205523	0.0159751	0.0421943		0.235679	0.00116436	0.00701987		GO:0005615//extracellular space;GO:0033276//transcription factor TFTC complex;GO:0000123//histone acetyltransferase complex;GO:0072686//mitotic spindle;GO:0030914//STAGA complex;GO:0005671//Ada2/Gcn5/Ada3 transcription activator complex;GO:0000790//nuclear chromatin;GO:0005634//nucleus	GO:0035264//multicellular organism growth;GO:0007399//nervous system development;GO:0008283//cell proliferation;GO:0043983//histone H4-K12 acetylation;GO:0021537//telencephalon development;GO:0031647//regulation of protein stability;GO:0055007//cardiac muscle cell differentiation;GO:1903955//positive regulation of protein targeting to mitochondrion;GO:0035948//positive regulation of gluconeogenes…	GO:0003713//transcription coactivator activity;GO:0005515//protein binding;GO:0004402//histone acetyltransferase activity;GO:0016740//transferase activity;GO:0010484//H3 histone acetyltransferase activity;GO:0008134//transcription factor binding;GO:0008080//N-acetyltransferase activity;GO:0016407//acetyltransferase activity;GO:0043997//histone acetyltransferase activity (H4-K12 specific);GO:00428…	K06062//HTLV-I infection;Notch signaling pathway;Viral carcinogenesis;Thyroid hormone signaling pathway
Kcnk2	ENSMUSG00000037624		0.779932	1.09e-08	7.82e-08		0.529547	8.59e-07	1.33e-05		GO:0016324//apical plasma membrane;GO:0005887//integral component of plasma membrane;GO:0043025//neuronal cell body;GO:0030424//axon;GO:0044305//calyx of Held;GO:0008076//voltage-gated potassium channel complex;GO:0009986//cell surface;GO:0016021//integral component of membrane;GO:0097449//astrocyte projection;GO:0043005//neuron projection;GO:0016020//membrane;GO:0005886//plasma membrane;GO:00056…	GO:0071456//cellular response to hypoxia;GO:0006813//potassium ion transport;GO:0006810//transport;GO:0007186//G-protein coupled receptor signaling pathway;GO:0006811//ion transport;GO:0010942//positive regulation of cell death;GO:0030322//stabilization of membrane potential;GO:0071805//potassium ion transmembrane transport;GO:0007613//memory;GO:0042391//regulation of membrane potential;GO:006004…	GO:0015271//outward rectifier potassium channel activity;GO:0005249//voltage-gated potassium channel activity;GO:0005515//protein binding;GO:0005267//potassium channel activity;GO:0022841//potassium ion leak channel activity	K04913//Gastric acid secretion
Kcnn4	ENSMUSG00000054342		1.65848	2.38e-05	0.000113725		0.970548	6.43e-06	7.86e-05		GO:0043025//neuronal cell body;GO:0005887//integral component of plasma membrane;GO:0016021//integral component of membrane;GO:0005886//plasma membrane;GO:0031982//vesicle;GO:0016020//membrane	GO:0050862//positive regulation of T cell receptor signaling pathway;GO:0006811//ion transport;GO:0045332//phospholipid translocation;GO:0006816//calcium ion transport;GO:0006884//cell volume homeostasis;GO:0046541//saliva secretion;GO:0006810//transport;GO:0006813//potassium ion transport;GO:0050714//positive regulation of protein secretion;GO:0071805//potassium ion transmembrane transport;GO:00…	GO:0019903//protein phosphatase binding;GO:0005516//calmodulin binding;GO:0005267//potassium channel activity;GO:0015269//calcium-activated potassium channel activity;GO:0016286//small conductance calcium-activated potassium channel activity	K04945//Insulin secretion;Protein digestion and absorption;Salivary secretion
Kctd12b	ENSMUSG00000041633		0.96217	5.52e-36	1.65e-34		0.430075	2.51e-11	9.01e-10		GO:0043235//receptor complex	GO:0008277//regulation of G-protein coupled receptor protein signaling pathway;GO:0051260//protein homooligomerization	-	-
Klhdc8a	ENSMUSG00000042115		0.646043	7.65e-17	1.04e-15		0.43417	7.42e-12	2.85e-10		GO:0031463//Cul3-RING ubiquitin ligase complex	GO:0016567//protein ubiquitination	GO:0004842//ubiquitin-protein transferase activity	-
Klhl2	ENSMUSG00000031605		0.252483	0.000341635	0.00134206		0.213051	0.00108386	0.00663559		GO:0005856//cytoskeleton;GO:0001726//ruffle;GO:0031463//Cul3-RING ubiquitin ligase complex;GO:0005829//cytosol;GO:0030027//lamellipodium;GO:0005737//cytoplasm;GO:0042995//cell projection;GO:0015629//actin cytoskeleton;GO:0001725//stress fiber	GO:0016567//protein ubiquitination;GO:0042787//protein ubiquitination involved in ubiquitin-dependent protein catabolic process	GO:0042803//protein homodimerization activity;GO:0003779//actin binding;GO:0042802//identical protein binding;GO:0004842//ubiquitin-protein transferase activity	-
Klhl6	ENSMUSG00000043008		5.4954	1.56e-23	2.97e-22		1.46528	4.98e-25	7.36e-23		GO:0005737//cytoplasm;GO:0005634//nucleus	GO:0002467//germinal center formation;GO:0050853//B cell receptor signaling pathway;GO:0006357//regulation of transcription from RNA polymerase II promoter;GO:0045893//positive regulation of transcription, DNA-templated	GO:0000976//transcription regulatory region sequence-specific DNA binding;GO:0003700//transcription factor activity, sequence-specific DNA binding	-
Klra2	ENSMUSG00000030187		1.30284	1.75e-14	2.06e-13		1.08672	4.29e-19	3.63e-17		GO:0016021//integral component of membrane;GO:0016020//membrane	-	GO:0030246//carbohydrate binding	-
Knop1	ENSMUSG00000030980		0.331854	7.47e-09	5.48e-08		0.241437	3.14e-05	0.00031989		GO:0005634//nucleus;GO:0005730//nucleolus	-	GO:0003723//RNA binding	-
Kpna2	ENSMUSG00000018362		0.508316	9.2e-07	5.41e-06		0.307012	0.000113077	0.0009614		GO:0005654//nucleoplasm;GO:0005829//cytosol;GO:0005634//nucleus;GO:0016020//membrane;GO:0005643//nuclear pore;GO:0005737//cytoplasm	GO:0015031//protein transport;GO:0006606//protein import into nucleus;GO:0006607//NLS-bearing protein import into nucleus;GO:0006810//transport	GO:0070491//repressing transcription factor binding;GO:0005515//protein binding;GO:0008565//protein transporter activity;GO:0042826//histone deacetylase binding;GO:0003723//RNA binding;GO:0008139//nuclear localization sequence binding	K15043//Influenza A
Kras	ENSMUSG00000030265		0.176812	0.00311298	0.00995279		0.260028	3.99e-06	5.15e-05		GO:0005886//plasma membrane;GO:0016020//membrane;GO:0031234//extrinsic component of cytoplasmic side of plasma membrane;GO:0045121//membrane raft;GO:0005737//cytoplasm;GO:0005739//mitochondrion;GO:0005925//focal adhesion	GO:0010628//positive regulation of gene expression;GO:0019221//cytokine-mediated signaling pathway;GO:0008542//visual learning;GO:0007565//female pregnancy;GO:0048169//regulation of long-term neuronal synaptic plasticity;GO:0051146//striated muscle cell differentiation;GO:0031647//regulation of protein stability;GO:0060441//epithelial tube branching involved in lung morphogenesis;GO:0043524//nega…	GO:0042802//identical protein binding;GO:0005515//protein binding;GO:0005525//GTP binding;GO:0019002//GMP binding;GO:0003924//GTPase activity;GO:0000166//nucleotide binding;GO:0019003//GDP binding;GO:0030275//LRR domain binding;GO:0032403//protein complex binding	K07827//PI3K-Akt signaling pathway;Colorectal cancer;Central carbon metabolism in cancer;Serotonergic synapse;Gap junction;Dorso-ventral axis formation;Hepatitis B;GnRH signaling pathway;Melanogenesis;HTLV-I infection;Proteoglycans in cancer;Phospholipase D signaling pathway;Renal cell carcinoma;B cell receptor signaling pathway;Axon guidance;Hepatitis C;Long-term depression;Rap1 signaling pathwa…
Krt80	ENSMUSG00000037185		1.01329	5.6e-12	5.44e-11		0.358144	0.00276727	0.0143498		GO:0045111//intermediate filament cytoskeleton;GO:0005737//cytoplasm;GO:0005882//intermediate filament;GO:0045095//keratin filament	-	GO:0005198//structural molecule activity	-
Lamb1	ENSMUSG00000002900		0.178865	0.0188996	0.0488002		0.396438	5.25e-12	2.08e-10		GO:0005604//basement membrane;GO:0005606//laminin-1 complex;GO:0005634//nucleus;GO:0043256//laminin complex;GO:0005576//extracellular region;GO:0005607//laminin-2 complex;GO:0070062//extracellular exosome;GO:0005605//basal lamina;GO:0043259//laminin-10 complex;GO:0043257//laminin-8 complex;GO:0005615//extracellular space;GO:0031012//extracellular matrix;GO:0048471//perinuclear region of cytoplasm…	GO:0042476//odontogenesis;GO:0007155//cell adhesion;GO:0007162//negative regulation of cell adhesion;GO:0021812//neuronal-glial interaction involved in cerebral cortex radial glia guided migration;GO:0007611//learning or memory;GO:0007566//embryo implantation;GO:0016477//cell migration;GO:0034446//substrate adhesion-dependent cell spreading;GO:0035987//endodermal cell differentiation;GO:0030335//…	GO:0005178//integrin binding;GO:0005201//extracellular matrix structural constituent;GO:0005515//protein binding;GO:0043208//glycosphingolipid binding;GO:0019899//enzyme binding	K04520//Serotonergic synapse;Alzheimer's disease
Lancl3	ENSMUSG00000047344		0.733081	1.8e-39	5.91e-38		0.288432	3.81e-09	9.48e-08		GO:0005886//plasma membrane	GO:0007165//signal transduction	-	-
Larp4	ENSMUSG00000023025		0.217972	3.6e-05	0.000166901		0.472985	2.57e-23	3.09e-21		GO:0022627//cytosolic small ribosomal subunit;GO:0010494//cytoplasmic stress granule;GO:0016020//membrane;GO:0005844//polysome;GO:0005829//cytosol	GO:0007010//cytoskeleton organization;GO:0045727//positive regulation of translation;GO:0022604//regulation of cell morphogenesis	GO:0003676//nucleic acid binding;GO:0008143//poly(A) binding;GO:0003723//RNA binding	-
Lbr	ENSMUSG00000004880		0.536483	3.18e-11	2.93e-10		0.268194	3.5e-06	4.55e-05		GO:0031965//nuclear membrane;GO:0005639//integral component of nuclear inner membrane;GO:0005635//nuclear envelope;GO:0005637//nuclear inner membrane;GO:0005652//nuclear lamina;GO:0016021//integral component of membrane;GO:0016020//membrane;GO:0005634//nucleus	GO:0016126//sterol biosynthetic process;GO:0055114//oxidation-reduction process	GO:0003677//DNA binding;GO:0070087//chromo shadow domain binding;GO:0016628//oxidoreductase activity, acting on the CH-CH group of donors, NAD or NADP as acceptor;GO:0016627//oxidoreductase activity, acting on the CH-CH group of donors;GO:0003723//RNA binding	-
Ldlrap1	ENSMUSG00000037295		0.391851	9.67e-05	0.00041813		0.430065	3.78e-07	6.31e-06		GO:0030121//AP-1 adaptor complex;GO:0005829//cytosol;GO:0009925//basal plasma membrane;GO:0055037//recycling endosome;GO:0005769//early endosome;GO:0005883//neurofilament;GO:0005737//cytoplasm;GO:0030122//AP-2 adaptor complex;GO:0030424//axon;GO:0009898//cytoplasmic side of plasma membrane	GO:0043393//regulation of protein binding;GO:0006629//lipid metabolic process;GO:1903076//regulation of protein localization to plasma membrane;GO:0031623//receptor internalization;GO:1905602//positive regulation of receptor-mediated endocytosis involved in cholesterol transport;GO:0006897//endocytosis;GO:0008203//cholesterol metabolic process;GO:0042632//cholesterol homeostasis;GO:0008202//stero…	GO:0005102//receptor binding;GO:0001784//phosphotyrosine residue binding;GO:0035591//signaling adaptor activity;GO:0035612//AP-2 adaptor complex binding;GO:0001540//amyloid-beta binding;GO:0030159//receptor signaling complex scaffold activity;GO:0030276//clathrin binding;GO:0005515//protein binding;GO:0035615//clathrin adaptor activity;GO:0005546//phosphatidylinositol-4,5-bisphosphate binding;GO:…	K12474//Endocytosis
Limk1	ENSMUSG00000029674		0.511559	2.34e-09	1.81e-08		0.269841	0.000283068	0.00211402		GO:0030027//lamellipodium;GO:0005829//cytosol;GO:0005634//nucleus;GO:0016020//membrane;GO:0043005//neuron projection;GO:0005794//Golgi apparatus;GO:0016607//nuclear speck;GO:0005925//focal adhesion;GO:0042995//cell projection;GO:0005737//cytoplasm	GO:0006468//protein phosphorylation;GO:0035556//intracellular signal transduction;GO:0016310//phosphorylation;GO:0032233//positive regulation of actin filament bundle assembly;GO:0051444//negative regulation of ubiquitin-protein transferase activity;GO:0051496//positive regulation of stress fiber assembly;GO:0045773//positive regulation of axon extension	GO:0004674//protein serine/threonine kinase activity;GO:0016740//transferase activity;GO:0004871//signal transducer activity;GO:0005515//protein binding;GO:0005524//ATP binding;GO:0016301//kinase activity;GO:0004672//protein kinase activity;GO:0046982//protein heterodimerization activity;GO:0046872//metal ion binding;GO:0031072//heat shock protein binding;GO:0000166//nucleotide binding	K05743//Regulation of actin cytoskeleton;Axon guidance;Fc gamma R-mediated phagocytosis
Lonrf3	ENSMUSG00000016239		0.946614	5.22e-15	6.39e-14		0.522979	3.38e-09	8.49e-08		GO:0005622//intracellular	GO:0000209//protein polyubiquitination;GO:0032436//positive regulation of proteasomal ubiquitin-dependent protein catabolic process	GO:0046872//metal ion binding;GO:0031624//ubiquitin conjugating enzyme binding;GO:0061630//ubiquitin protein ligase activity	-
Loxl3	ENSMUSG00000000693		0.885362	1.46e-46	5.78e-45		0.168996	0.00131622	0.00777943		GO:0005737//cytoplasm;GO:0005615//extracellular space;GO:0005576//extracellular region;GO:0016020//membrane;GO:0005634//nucleus	GO:0055114//oxidation-reduction process;GO:0006954//inflammatory response;GO:2000329//negative regulation of T-helper 17 cell lineage commitment;GO:0061053//somite development;GO:0030324//lung development;GO:0006898//receptor-mediated endocytosis;GO:0060021//palate development;GO:1905590//fibronectin fibril organization;GO:0018057//peptidyl-lysine oxidation;GO:2001046//positive regulation of inte…	GO:0016491//oxidoreductase activity;GO:0005044//scavenger receptor activity;GO:0004720//protein-lysine 6-oxidase activity;GO:0016641//oxidoreductase activity, acting on the CH-NH2 group of donors, oxygen as acceptor;GO:0005507//copper ion binding;GO:0001968//fibronectin binding;GO:0046872//metal ion binding	-
Lpin3	ENSMUSG00000027412		2.51109	0	0		0.184441	0.000245876	0.00186894		GO:0005634//nucleus	GO:0045944//positive regulation of transcription from RNA polymerase II promoter;GO:0009062//fatty acid catabolic process;GO:0016311//dephosphorylation;GO:0006631//fatty acid metabolic process;GO:0006629//lipid metabolic process;GO:0019432//triglyceride biosynthetic process	GO:0016787//hydrolase activity;GO:0003713//transcription coactivator activity;GO:0008195//phosphatidate phosphatase activity	K15728//Biosynthesis of secondary metabolites;Glycerophospholipid metabolism;Glycerolipid metabolism;Metabolic pathways
Lrrc32	ENSMUSG00000090958		0.411341	5.89e-05	0.000264381		0.255075	0.00115431	0.00698265		GO:0016021//integral component of membrane;GO:0016020//membrane;GO:0005887//integral component of plasma membrane	GO:0010628//positive regulation of gene expression;GO:0050710//negative regulation of cytokine secretion;GO:0046007//negative regulation of activated T cell proliferation	-	-
Lrrc8a	ENSMUSG00000007476		0.507957	2.33e-09	1.8e-08		0.574437	2.28e-15	1.35e-13		GO:0034702//ion channel complex;GO:0016020//membrane;GO:0005886//plasma membrane;GO:0005737//cytoplasm;GO:0016021//integral component of membrane;GO:0009986//cell surface	GO:0006970//response to osmotic stress;GO:0006810//transport;GO:0044070//regulation of anion transport;GO:0002329//pre-B cell differentiation;GO:0030154//cell differentiation;GO:0006884//cell volume homeostasis;GO:0006820//anion transport;GO:0006811//ion transport;GO:0007165//signal transduction;GO:0098656//anion transmembrane transport	GO:0042802//identical protein binding;GO:0005225//volume-sensitive anion channel activity;GO:0005253//anion channel activity	-
Lrrc8d	ENSMUSG00000046079		0.960381	4.85e-10	4.04e-09		0.48855	1.52e-05	0.00016905		GO:0034702//ion channel complex;GO:0005886//plasma membrane;GO:0016020//membrane;GO:0005887//integral component of plasma membrane;GO:0005783//endoplasmic reticulum;GO:0016021//integral component of membrane;GO:0005737//cytoplasm;GO:0005789//endoplasmic reticulum membrane	GO:0044070//regulation of anion transport;GO:0007165//signal transduction;GO:0098656//anion transmembrane transport;GO:0006810//transport;GO:0006811//ion transport	GO:0005225//volume-sensitive anion channel activity	-
Lrrfip1	ENSMUSG00000026305		0.1347	0.0186836	0.0483514		0.739529	1.17e-49	6.81e-47		GO:0005737//cytoplasm;GO:0005829//cytosol;GO:0005886//plasma membrane;GO:0005634//nucleus	GO:0006355//regulation of transcription, DNA-templated;GO:0006351//transcription, DNA-templated;GO:0051092//positive regulation of NF-kappaB transcription factor activity;GO:0000122//negative regulation of transcription from RNA polymerase II promoter	GO:0001078//transcriptional repressor activity, RNA polymerase II core promoter proximal region sequence-specific binding;GO:0042803//protein homodimerization activity;GO:0045296//cadherin binding;GO:0003677//DNA binding;GO:0005515//protein binding;GO:0000978//RNA polymerase II core promoter proximal region sequence-specific DNA binding	-
Lrrk2	ENSMUSG00000036273		0.306845	3.48e-08	2.4e-07		0.363044	1.75e-12	7.36e-11		GO:0043195//terminal bouton;GO:1990909//Wnt signalosome;GO:0097487//multivesicular body, internal vesicle;GO:0005798//Golgi-associated vesicle;GO:0043005//neuron projection;GO:0030529//intracellular ribonucleoprotein complex;GO:0008021//synaptic vesicle;GO:0005739//mitochondrion;GO:0005794//Golgi apparatus;GO:0070062//extracellular exosome;GO:0005902//microvillus;GO:0045121//membrane raft;GO:0043…	GO:1902902//negative regulation of autophagosome assembly;GO:0070997//neuron death;GO:0019722//calcium-mediated signaling;GO:1901214//regulation of neuron death;GO:0051966//regulation of synaptic transmission, glutamatergic;GO:0032092//positive regulation of protein binding;GO:0007005//mitochondrion organization;GO:0034260//negative regulation of GTPase activity;GO:1903125//negative regulation of…	GO:0044325//ion channel binding;GO:0000166//nucleotide binding;GO:0030159//receptor signaling complex scaffold activity;GO:0004672//protein kinase activity;GO:0030276//clathrin binding;GO:0005515//protein binding;GO:0004871//signal transducer activity;GO:0017048//Rho GTPase binding;GO:0015631//tubulin binding;GO:0005096//GTPase activator activity;GO:0042803//protein homodimerization activity;GO:0…	K08844//Parkinson's disease
Lrrn4cl	ENSMUSG00000071656		0.987234	5.33e-45	2.01e-43		0.288675	3.6e-07	6.06e-06		GO:0016021//integral component of membrane;GO:0016020//membrane	-	-	-
Ltv1	ENSMUSG00000019814		0.330273	7.6e-07	4.51e-06		0.252912	4.16e-05	0.000409704		GO:0005829//cytosol;GO:0005634//nucleus;GO:0034448//EGO complex;GO:0031902//late endosome membrane;GO:0005654//nucleoplasm;GO:0030688//preribosome, small subunit precursor	GO:0000056//ribosomal small subunit export from nucleus;GO:0042274//ribosomal small subunit biogenesis	-	-
Lurap1l	ENSMUSG00000048706		1.48161	3.73e-64	2.17e-62		0.281832	7.8e-06	9.32e-05		-	GO:0043123//positive regulation of I-kappaB kinase/NF-kappaB signaling	-	-
Lyar	ENSMUSG00000067367		0.188646	0.0125854	0.0342477		0.40888	1.16e-08	2.65e-07		GO:0005730//nucleolus;GO:0005634//nucleus	-	GO:0046872//metal ion binding;GO:0003723//RNA binding	-
Maff	ENSMUSG00000042622		0.523769	8.62e-06	4.43e-05		0.212287	0.00351114	0.0174014		GO:0005739//mitochondrion;GO:0005654//nucleoplasm;GO:0005634//nucleus	GO:0035914//skeletal muscle cell differentiation;GO:0045944//positive regulation of transcription from RNA polymerase II promoter;GO:0006351//transcription, DNA-templated;GO:0045604//regulation of epidermal cell differentiation;GO:0006355//regulation of transcription, DNA-templated;GO:0001701//in utero embryonic development	GO:0003677//DNA binding;GO:0003700//transcription factor activity, sequence-specific DNA binding;GO:0043565//sequence-specific DNA binding	-
Magi1	ENSMUSG00000045095		0.366394	2.72e-06	1.5e-05		0.236962	0.000417349	0.00293337		GO:0005912//adherens junction;GO:0005654//nucleoplasm;GO:0005886//plasma membrane;GO:0005634//nucleus;GO:0016020//membrane;GO:0005923//bicellular tight junction;GO:0005737//cytoplasm;GO:0030054//cell junction;GO:0042995//cell projection	GO:0070997//neuron death	GO:0051393//alpha-actinin binding;GO:0005524//ATP binding;GO:0005515//protein binding;GO:0032947//protein complex scaffold activity;GO:0000166//nucleotide binding	K05631//Tight junction;Rap1 signaling pathway
Magohb	ENSMUSG00000030188		0.295609	0.00163132	0.0055823		0.245287	0.0033824	0.0168611		GO:0005634//nucleus;GO:0043025//neuronal cell body;GO:0035145//exon-exon junction complex	GO:0000184//nuclear-transcribed mRNA catabolic process, nonsense-mediated decay	GO:0003723//RNA binding	K12877//Spliceosome;mRNA surveillance pathway;RNA transport
Map3k14	ENSMUSG00000020941		0.445081	1.69e-05	8.26e-05		0.29586	6.22e-05	0.000578793		GO:0005737//cytoplasm;GO:0043231//intracellular membrane-bounded organelle;GO:0005829//cytosol;GO:0005634//nucleus;GO:0001650//fibrillar center	GO:0007346//regulation of mitotic cell cycle;GO:0031098//stress-activated protein kinase signaling cascade;GO:0006955//immune response;GO:0016310//phosphorylation;GO:0007249//I-kappaB kinase/NF-kappaB signaling;GO:0000186//activation of MAPKK activity;GO:0000165//MAPK cascade;GO:0071260//cellular response to mechanical stimulus;GO:0038061//NIK/NF-kappaB signaling;GO:0051607//defense response to v…	GO:0004674//protein serine/threonine kinase activity;GO:0005524//ATP binding;GO:0005515//protein binding;GO:0016740//transferase activity;GO:0004709//MAP kinase kinase kinase activity;GO:0004672//protein kinase activity;GO:0016301//kinase activity;GO:0004704//NF-kappaB-inducing kinase activity;GO:0000166//nucleotide binding	K04466//NF-kappa B signaling pathway;T cell receptor signaling pathway;Apoptosis;Epithelial cell signaling in Helicobacter pylori infection;Osteoclast differentiation;Epstein-Barr virus infection;TNF signaling pathway;HTLV-I infection;MAPK signaling pathway;Intestinal immune network for IgA production
Map3k5	ENSMUSG00000071369		0.937809	5.38e-30	1.3e-28		0.505409	7.02e-14	3.54e-12		GO:0005622//intracellular;GO:1990604//IRE1-TRAF2-ASK1 complex;GO:1902911//protein kinase complex;GO:0009897//external side of plasma membrane;GO:0005783//endoplasmic reticulum;GO:0043234//protein complex;GO:0005737//cytoplasm;GO:0005829//cytosol	GO:0008631//intrinsic apoptotic signaling pathway in response to oxidative stress;GO:0045663//positive regulation of myoblast differentiation;GO:0006468//protein phosphorylation;GO:0006915//apoptotic process;GO:1901216//positive regulation of neuron death;GO:0034198//cellular response to amino acid starvation;GO:0043280//positive regulation of cysteine-type endopeptidase activity involved in apop…	GO:0016301//kinase activity;GO:0019901//protein kinase binding;GO:0019904//protein domain specific binding;GO:0004709//MAP kinase kinase kinase activity;GO:0046872//metal ion binding;GO:0000287//magnesium ion binding;GO:0004672//protein kinase activity;GO:0000166//nucleotide binding;GO:0019903//protein phosphatase binding;GO:0004674//protein serine/threonine kinase activity;GO:0042803//protein ho…	K04426//Sphingolipid signaling pathway;Non-alcoholic fatty liver disease (NAFLD);Amyotrophic lateral sclerosis (ALS);Protein processing in endoplasmic reticulum;MAPK signaling pathway;TNF signaling pathway;Neurotrophin signaling pathway
Map3k6	ENSMUSG00000028862		2.5144	5.14e-111	5.89e-109		0.231683	0.00182386	0.0101481		GO:0005622//intracellular	GO:0000186//activation of MAPKK activity;GO:0006468//protein phosphorylation;GO:0000165//MAPK cascade;GO:0016310//phosphorylation	GO:0016301//kinase activity;GO:0004709//MAP kinase kinase kinase activity;GO:0000287//magnesium ion binding;GO:0004672//protein kinase activity;GO:0000166//nucleotide binding;GO:0016740//transferase activity;GO:0005524//ATP binding	K04425//MAPK signaling pathway
Map4k4	ENSMUSG00000026074		1.4568	8.34e-132	1.18e-129		0.165047	0.000729986	0.00472947		GO:0005737//cytoplasm	GO:0035556//intracellular signal transduction;GO:0010977//negative regulation of neuron projection development;GO:0046328//regulation of JNK cascade;GO:0006468//protein phosphorylation;GO:0043066//negative regulation of apoptotic process;GO:0070571//negative regulation of neuron projection regeneration;GO:0061179//negative regulation of insulin secretion involved in cellular response to glucose s…	GO:0004674//protein serine/threonine kinase activity;GO:0004672//protein kinase activity;GO:0000166//nucleotide binding;GO:0005524//ATP binding;GO:0004111//creatine kinase activity	K04407//MAPK signaling pathway
Mb21d2	ENSMUSG00000051065		0.544398	3.86e-12	3.81e-11		0.266996	0.000101638	0.000882411		-	-	GO:0045296//cadherin binding;GO:0032403//protein complex binding	-
Mbnl3	ENSMUSG00000036109		1.69357	3.78e-84	3.24e-82		0.2509	0.000374975	0.00267778		GO:0005634//nucleus;GO:0005737//cytoplasm	GO:0008380//RNA splicing;GO:0007275//multicellular organism development;GO:0006397//mRNA processing;GO:0045662//negative regulation of myoblast differentiation;GO:0043484//regulation of RNA splicing	GO:0003723//RNA binding;GO:0046872//metal ion binding	-
Mettl25	ENSMUSG00000036009		0.491419	1.96e-06	1.11e-05		0.222242	0.0119339	0.0468696		-	-	-	-
Mgp	ENSMUSG00000030218		0.542983	1.7e-11	1.6e-10		0.70772	1.51e-21	1.52e-19		GO:0005576//extracellular region;GO:0031012//extracellular matrix;GO:0070062//extracellular exosome	GO:0001503//ossification;GO:0007275//multicellular organism development;GO:0030500//regulation of bone mineralization;GO:0030154//cell differentiation;GO:0051216//cartilage development	GO:0005509//calcium ion binding;GO:0005201//extracellular matrix structural constituent	-
Micall2	ENSMUSG00000036718		0.289618	0.0190029	0.0490258		0.450696	5.06e-06	6.36e-05		GO:0016020//membrane;GO:0043005//neuron projection;GO:0005829//cytosol;GO:0005886//plasma membrane;GO:0005856//cytoskeleton;GO:0055037//recycling endosome;GO:0005768//endosome;GO:0030054//cell junction;GO:0042995//cell projection;GO:0005737//cytoplasm;GO:0005923//bicellular tight junction;GO:0032432//actin filament bundle;GO:0005911//cell-cell junction;GO:0001725//stress fiber	GO:0031175//neuron projection development;GO:0031532//actin cytoskeleton reorganization;GO:0030041//actin filament polymerization;GO:0032456//endocytic recycling;GO:0034446//substrate adhesion-dependent cell spreading;GO:0070830//bicellular tight junction assembly;GO:1903955//positive regulation of protein targeting to mitochondrion	GO:0031005//filamin binding;GO:0042805//actinin binding;GO:0046872//metal ion binding;GO:0017137//Rab GTPase binding;GO:0005515//protein binding;GO:0051015//actin filament binding	-
Mindy1	ENSMUSG00000038712		0.712305	2.01e-30	4.93e-29		0.179547	0.0013115	0.0077572		GO:0070062//extracellular exosome	GO:0006508//proteolysis;GO:0071108//protein K48-linked deubiquitination	GO:0016787//hydrolase activity;GO:0016807//cysteine-type carboxypeptidase activity;GO:0036435//K48-linked polyubiquitin modification-dependent protein binding;GO:1990380//Lys48-specific deubiquitinase activity;GO:0008233//peptidase activity;GO:0004843//thiol-dependent ubiquitin-specific protease activity;GO:0008234//cysteine-type peptidase activity;GO:0036459//thiol-dependent ubiquitinyl hydrolas…	-
Mir17hg	ENSMUSG00000089726		1.01043	1.36e-11	1.29e-10		0.751788	2.22e-17	1.64e-15		-	-	-	-
Mir221	ENSMUSG00000065422		1.13747	4.94e-06	2.63e-05		0.845445	1.6e-08	3.55e-07		-	GO:1900016//negative regulation of cytokine production involved in inflammatory response;GO:0035195//gene silencing by miRNA	GO:1903231//mRNA binding involved in posttranscriptional gene silencing	-
Mir763	ENSMUSG00000076448		1.67751	0.00802974	0.0231293		1.53901	2.21e-05	0.000236506		-	-	-	-
Mmd	ENSMUSG00000003948		0.325667	1.95e-07	1.25e-06		0.632057	1.58e-20	1.49e-18		GO:0031902//late endosome membrane;GO:0005794//Golgi apparatus;GO:0005765//lysosomal membrane;GO:0016020//membrane;GO:0005768//endosome;GO:0005764//lysosome;GO:0016021//integral component of membrane	GO:0019835//cytolysis;GO:0006468//protein phosphorylation;GO:0045860//positive regulation of protein kinase activity;GO:0032880//regulation of protein localization;GO:0045666//positive regulation of neuron differentiation	GO:0004672//protein kinase activity	-
Mmp19	ENSMUSG00000025355		0.878163	3.13e-54	1.51e-52		0.882037	9.62e-56	8.22e-53		GO:0031225//anchored component of membrane;GO:0005886//plasma membrane;GO:0005576//extracellular region;GO:0016020//membrane;GO:0031012//extracellular matrix;GO:0005615//extracellular space;GO:0005578//proteinaceous extracellular matrix	GO:0001542//ovulation from ovarian follicle;GO:0001541//ovarian follicle development;GO:0006508//proteolysis;GO:0007275//multicellular organism development;GO:0030154//cell differentiation;GO:0051591//response to cAMP;GO:0001554//luteolysis;GO:0009725//response to hormone;GO:0030574//collagen catabolic process;GO:0001525//angiogenesis	GO:0016787//hydrolase activity;GO:0008237//metallopeptidase activity;GO:0046872//metal ion binding;GO:0008233//peptidase activity;GO:0004222//metalloendopeptidase activity;GO:0008270//zinc ion binding;GO:0004252//serine-type endopeptidase activity	-
Mob3a	ENSMUSG00000003348		0.216819	0.00315949	0.0100866		0.354171	9.67e-09	2.24e-07		GO:0005622//intracellular	-	GO:0046872//metal ion binding	-
Mrpl12	ENSMUSG00000039640		0.206895	0.0166563	0.0437855		0.219938	0.000324461	0.00237186		GO:0005739//mitochondrion;GO:0005622//intracellular;GO:0030529//intracellular ribonucleoprotein complex;GO:0005761//mitochondrial ribosome;GO:0005762//mitochondrial large ribosomal subunit;GO:0005840//ribosome	GO:0045893//positive regulation of transcription, DNA-templated;GO:0006412//translation;GO:0006390//transcription from mitochondrial promoter	GO:0003735//structural constituent of ribosome	K02935//Ribosome
Mrps6	ENSMUSG00000039680		0.285981	8.36e-05	0.000365517		0.227604	0.000525185	0.00357522		GO:0005739//mitochondrion;GO:0030529//intracellular ribonucleoprotein complex;GO:0005763//mitochondrial small ribosomal subunit;GO:0005840//ribosome	GO:0006412//translation;GO:0032543//mitochondrial translation	GO:0019843//rRNA binding;GO:0070181//small ribosomal subunit rRNA binding;GO:0003735//structural constituent of ribosome	K02990//Ribosome
Mrvi1	ENSMUSG00000005611		0.878249	2.28e-11	2.13e-10		0.378889	0.00066433	0.00436329		GO:0048471//perinuclear region of cytoplasm;GO:0016021//integral component of membrane;GO:0005737//cytoplasm;GO:0016529//sarcoplasmic reticulum;GO:0016020//membrane	GO:0060087//relaxation of vascular smooth muscle;GO:0045986//negative regulation of smooth muscle contraction;GO:0019934//cGMP-mediated signaling	GO:0005515//protein binding	K12337//cGMP-PKG signaling pathway;Vascular smooth muscle contraction
Mt2	ENSMUSG00000031762		4.50191	0	0		0.558449	2.68e-22	2.92e-20		GO:0048471//perinuclear region of cytoplasm;GO:0005737//cytoplasm;GO:0005829//cytosol;GO:0005634//nucleus	GO:0071294//cellular response to zinc ion;GO:0007263//nitric oxide mediated signal transduction;GO:0006882//cellular zinc ion homeostasis;GO:0010273//detoxification of copper ion;GO:0045926//negative regulation of growth;GO:0048143//astrocyte activation	GO:0046870//cadmium ion binding;GO:0008270//zinc ion binding;GO:0046872//metal ion binding	K14739//Mineral absorption
Mt4	ENSMUSG00000031757		4.74277	0.000358913	0.00140307		1.30115	0.00426418	0.0204107		GO:0005623//cell;GO:0005829//cytosol	GO:0046686//response to cadmium ion;GO:0006875//cellular metal ion homeostasis	GO:0046872//metal ion binding	-
Mta2	ENSMUSG00000071646		0.179923	0.000438157	0.00168608		0.145857	0.00146291	0.00847068		GO:0016581//NuRD complex;GO:0005654//nucleoplasm;GO:0005667//transcription factor complex;GO:0000118//histone deacetylase complex;GO:0000790//nuclear chromatin;GO:0005634//nucleus;GO:0016020//membrane;GO:0043234//protein complex	GO:0043044//ATP-dependent chromatin remodeling;GO:0045944//positive regulation of transcription from RNA polymerase II promoter;GO:0006338//chromatin remodeling;GO:0006355//regulation of transcription, DNA-templated;GO:0000122//negative regulation of transcription from RNA polymerase II promoter;GO:0016575//histone deacetylation;GO:0010762//regulation of fibroblast migration;GO:0006323//DNA packa…	GO:0043565//sequence-specific DNA binding;GO:0003700//transcription factor activity, sequence-specific DNA binding;GO:0001103//RNA polymerase II repressing transcription factor binding;GO:0008270//zinc ion binding;GO:0044212//transcription regulatory region DNA binding;GO:0031492//nucleosomal DNA binding;GO:0005515//protein binding;GO:0000989//transcription factor activity, transcription factor b…	-
Mthfd1	ENSMUSG00000021048		0.403307	1.14e-14	1.36e-13		0.144805	0.00350352	0.0173742		GO:0016020//membrane;GO:0005829//cytosol;GO:0005737//cytoplasm;GO:0005739//mitochondrion;GO:0070062//extracellular exosome	GO:0007507//heart development;GO:0006164//purine nucleotide biosynthetic process;GO:0009113//purine nucleobase biosynthetic process;GO:0006555//methionine metabolic process;GO:0008152//metabolic process;GO:0055114//oxidation-reduction process;GO:0009069//serine family amino acid metabolic process;GO:0001843//neural tube closure;GO:0035999//tetrahydrofolate interconversion;GO:0001780//neutrophil h…	GO:0016874//ligase activity;GO:0004477//methenyltetrahydrofolate cyclohydrolase activity;GO:0000166//nucleotide binding;GO:0004488//methylenetetrahydrofolate dehydrogenase (NADP+) activity;GO:0016787//hydrolase activity;GO:0003824//catalytic activity;GO:0005524//ATP binding;GO:0016491//oxidoreductase activity;GO:0004329//formate-tetrahydrofolate ligase activity;GO:0004487//methylenetetrahydrofola…	K00288//One carbon pool by folate;Metabolic pathways
Mthfd2l	ENSMUSG00000029376		0.393489	6.67e-07	3.98e-06		0.215133	0.00297721	0.0152222		GO:0005739//mitochondrion;GO:0005743//mitochondrial inner membrane;GO:0016020//membrane;GO:0005759//mitochondrial matrix	GO:0008652//cellular amino acid biosynthetic process;GO:0006730//one-carbon metabolic process;GO:0000105//histidine biosynthetic process;GO:0008152//metabolic process;GO:0055114//oxidation-reduction process;GO:0009256//10-formyltetrahydrofolate metabolic process;GO:0035999//tetrahydrofolate interconversion;GO:0006164//purine nucleotide biosynthetic process;GO:0009086//methionine biosynthetic proc…	GO:0016787//hydrolase activity;GO:0004487//methylenetetrahydrofolate dehydrogenase (NAD+) activity;GO:0004488//methylenetetrahydrofolate dehydrogenase (NADP+) activity;GO:0004477//methenyltetrahydrofolate cyclohydrolase activity;GO:0003824//catalytic activity;GO:0016491//oxidoreductase activity	K13403//Metabolic pathways;One carbon pool by folate
Mtmr10	ENSMUSG00000030522		0.817608	5.37e-33	1.44e-31		0.484562	1.77e-17	1.33e-15		GO:0005737//cytoplasm	-	-	-
Mybbp1a	ENSMUSG00000040463		0.17846	0.001187	0.00418482		0.271847	9.28e-07	1.42e-05		GO:0005730//nucleolus;GO:0005737//cytoplasm;GO:0043231//intracellular membrane-bounded organelle;GO:0005634//nucleus;GO:0042564//NLS-dependent protein nuclear import complex;GO:0016020//membrane	GO:0071158//positive regulation of cell cycle arrest;GO:0006351//transcription, DNA-templated;GO:0042149//cellular response to glucose starvation;GO:0006355//regulation of transcription, DNA-templated;GO:0032922//circadian regulation of gene expression;GO:0048511//rhythmic process;GO:0006913//nucleocytoplasmic transport;GO:0001649//osteoblast differentiation;GO:2000210//positive regulation of ano…	GO:0043565//sequence-specific DNA binding;GO:0008134//transcription factor binding;GO:0003723//RNA binding;GO:0003714//transcription corepressor activity;GO:0003887//DNA-directed DNA polymerase activity;GO:0003677//DNA binding;GO:0005515//protein binding;GO:0008270//zinc ion binding;GO:0001047//core promoter binding	-
Myc	ENSMUSG00000022346		0.872902	5.56e-28	1.25e-26		0.207384	0.0108983	0.0435934		GO:0005654//nucleoplasm;GO:0005634//nucleus;GO:0000790//nuclear chromatin;GO:0016604//nuclear body;GO:0005730//nucleolus;GO:0005739//mitochondrion;GO:0005719//nuclear euchromatin;GO:0030424//axon;GO:0005819//spindle;GO:0048471//perinuclear region of cytoplasm;GO:0043234//protein complex;GO:0005737//cytoplasm	GO:0046325//negative regulation of glucose import;GO:0071407//cellular response to organic cyclic compound;GO:0048705//skeletal system morphogenesis;GO:0048147//negative regulation of fibroblast proliferation;GO:0006919//activation of cysteine-type endopeptidase activity involved in apoptotic process;GO:0042474//middle ear morphogenesis;GO:0006338//chromatin remodeling;GO:0045023//G0 to G1 transi…	GO:0043565//sequence-specific DNA binding;GO:0008134//transcription factor binding;GO:0001077//transcriptional activator activity, RNA polymerase II core promoter proximal region sequence-specific binding;GO:0005515//protein binding;GO:0046982//protein heterodimerization activity;GO:0033613//activating transcription factor binding;GO:0000979//RNA polymerase II core promoter sequence-specific DNA …	K04377//Chronic myeloid leukemia;Hepatitis B;Thyroid hormone signaling pathway;Central carbon metabolism in cancer;Thyroid cancer;Colorectal cancer;PI3K-Akt signaling pathway;Bladder cancer;Wnt signaling pathway;Hippo signaling pathway;Proteoglycans in cancer;HTLV-I infection;Pathways in cancer;Endometrial cancer;Cell cycle;Signaling pathways regulating pluripotency of stem cells;MicroRNAs in can…
Myo18a	ENSMUSG00000000631		0.406231	7.64e-09	5.6e-08		0.21387	0.000113394	0.0009629		GO:0016020//membrane;GO:0005856//cytoskeleton;GO:0000139//Golgi membrane;GO:0005903//brush border;GO:0005793//endoplasmic reticulum-Golgi intermediate compartment;GO:0005802//trans-Golgi network;GO:0016459//myosin complex;GO:0005737//cytoplasm;GO:0042641//actomyosin;GO:0005794//Golgi apparatus	GO:0048194//Golgi vesicle budding;GO:0090161//Golgi ribbon formation;GO:0016477//cell migration;GO:0043030//regulation of macrophage activation;GO:0031032//actomyosin structure organization;GO:1903028//positive regulation of opsonization;GO:0007030//Golgi organization;GO:0090164//asymmetric Golgi ribbon formation;GO:0050714//positive regulation of protein secretion;GO:0043066//negative regulation…	GO:0043531//ADP binding;GO:0003723//RNA binding;GO:0003774//motor activity;GO:0005524//ATP binding;GO:0051015//actin filament binding;GO:0000166//nucleotide binding	-
Nav1	ENSMUSG00000009418		0.454325	0.00113533	0.00401771		0.724229	7.09e-12	2.74e-10		GO:0043194//axon initial segment;GO:0015630//microtubule cytoskeleton;GO:0005874//microtubule;GO:0005737//cytoplasm;GO:0005856//cytoskeleton	GO:0001578//microtubule bundle formation;GO:0030154//cell differentiation;GO:0001764//neuron migration;GO:0007275//multicellular organism development;GO:0007399//nervous system development	-	-
Nav2	ENSMUSG00000052512		1.11936	3.67e-05	0.000170272		0.853284	0.00012267	0.00103356		GO:0005578//proteinaceous extracellular matrix;GO:0005614//interstitial matrix;GO:0005654//nucleoplasm	GO:0007605//sensory perception of sound;GO:0021563//glossopharyngeal nerve development;GO:0003025//regulation of systemic arterial blood pressure by baroreceptor feedback;GO:0021564//vagus nerve development;GO:0007626//locomotory behavior;GO:0007399//nervous system development;GO:0021554//optic nerve development;GO:0007608//sensory perception of smell	GO:0008201//heparin binding	-
Ndufaf4	ENSMUSG00000028261		0.456663	8.39e-06	4.32e-05		0.448053	1.74e-08	3.83e-07		GO:0031966//mitochondrial membrane;GO:0005739//mitochondrion;GO:0016020//membrane	GO:0032981//mitochondrial respiratory chain complex I assembly;GO:0010257//NADH dehydrogenase complex assembly	GO:0005516//calmodulin binding	-
Nedd1	ENSMUSG00000019988		0.318327	2.33e-07	1.48e-06		0.183165	0.00210503	0.0113848		GO:0005815//microtubule organizing center;GO:0036064//ciliary basal body;GO:0005814//centriole;GO:0000922//spindle pole;GO:0005856//cytoskeleton;GO:0000924//gamma-tubulin ring complex, centrosomal;GO:0045177//apical part of cell;GO:0005813//centrosome;GO:0005737//cytoplasm;GO:0000242//pericentriolar material	GO:0071539//protein localization to centrosome;GO:0070201//regulation of establishment of protein localization;GO:0051301//cell division;GO:0007049//cell cycle;GO:0007019//microtubule depolymerization;GO:0031109//microtubule polymerization or depolymerization	-	-
Nek6	ENSMUSG00000026749		0.631451	2.66e-23	4.98e-22		0.204405	0.000802142	0.00513586		GO:0005654//nucleoplasm;GO:0005813//centrosome;GO:0005815//microtubule organizing center;GO:0005829//cytosol;GO:0005634//nucleus;GO:0005856//cytoskeleton;GO:0000922//spindle pole;GO:0016607//nuclear speck;GO:0043231//intracellular membrane-bounded organelle;GO:0005737//cytoplasm;GO:0043234//protein complex	GO:0046777//protein autophosphorylation;GO:0043123//positive regulation of I-kappaB kinase/NF-kappaB signaling;GO:0006468//protein phosphorylation;GO:0032147//activation of protein kinase activity;GO:0007059//chromosome segregation;GO:0006915//apoptotic process;GO:0018105//peptidyl-serine phosphorylation;GO:0031098//stress-activated protein kinase signaling cascade;GO:0023014//signal transduction…	GO:0019894//kinesin binding;GO:0005524//ATP binding;GO:0004871//signal transducer activity;GO:0016740//transferase activity;GO:0001222//transcription corepressor binding;GO:0004674//protein serine/threonine kinase activity;GO:0000166//nucleotide binding;GO:0033613//activating transcription factor binding;GO:0046872//metal ion binding;GO:0000287//magnesium ion binding;GO:0004672//protein kinase ac…	-
Nek7	ENSMUSG00000026393		0.140004	0.00818934	0.023514		0.189779	0.000158413	0.00128922		GO:0005654//nucleoplasm;GO:0005856//cytoskeleton;GO:0005737//cytoplasm;GO:0000922//spindle pole;GO:0005815//microtubule organizing center;GO:0005634//nucleus	GO:0016310//phosphorylation;GO:0032212//positive regulation of telomere maintenance via telomerase;GO:1904355//positive regulation of telomere capping;GO:0006468//protein phosphorylation;GO:0051973//positive regulation of telomerase activity	GO:0004674//protein serine/threonine kinase activity;GO:0016740//transferase activity;GO:0005524//ATP binding;GO:0005515//protein binding;GO:0016301//kinase activity;GO:0004672//protein kinase activity;GO:0046872//metal ion binding;GO:0000166//nucleotide binding	-
Nhp2	ENSMUSG00000001056		0.224206	0.00173526	0.00590533		0.376675	9.08e-11	3.06e-09		GO:0090661//box H/ACA telomerase RNP complex;GO:0030529//intracellular ribonucleoprotein complex;GO:0005730//nucleolus;GO:0015030//Cajal body;GO:0031429//box H/ACA snoRNP complex;GO:0005697//telomerase holoenzyme complex;GO:0005732//small nucleolar ribonucleoprotein complex;GO:0005634//nucleus;GO:0000784//nuclear chromosome, telomeric region	GO:0031118//rRNA pseudouridine synthesis;GO:0006364//rRNA processing;GO:0000470//maturation of LSU-rRNA;GO:0031120//snRNA pseudouridine synthesis;GO:0042254//ribosome biogenesis;GO:1904874//positive regulation of telomerase RNA localization to Cajal body;GO:0000469//cleavage involved in rRNA processing;GO:0006412//translation	GO:0070034//telomerase RNA binding;GO:0005515//protein binding;GO:0034513//box H/ACA snoRNA binding;GO:0003723//RNA binding;GO:0030515//snoRNA binding	K11129//Ribosome biogenesis in eukaryotes
Nid1	ENSMUSG00000005397		0.55688	6.78e-10	5.56e-09		0.222741	0.000581211	0.0038994		GO:0071944//cell periphery;GO:0005604//basement membrane;GO:0005576//extracellular region;GO:0070062//extracellular exosome;GO:0005605//basal lamina;GO:0005578//proteinaceous extracellular matrix;GO:0031012//extracellular matrix;GO:0005615//extracellular space	GO:0030198//extracellular matrix organization;GO:0007155//cell adhesion;GO:0007160//cell-matrix adhesion;GO:0010811//positive regulation of cell-substrate adhesion;GO:0032836//glomerular basement membrane development	GO:0050840//extracellular matrix binding;GO:0005518//collagen binding;GO:0005515//protein binding;GO:0043394//proteoglycan binding;GO:0043237//laminin-1 binding;GO:0043236//laminin binding;GO:0005509//calcium ion binding	K05719//Cell adhesion molecules (CAMs);Proteoglycans in cancer;Bacterial invasion of epithelial cells;Arrhythmogenic right ventricular cardiomyopathy (ARVC);Leishmaniasis;Hypertrophic cardiomyopathy (HCM);Leukocyte transendothelial migration;Platelet activation;ECM-receptor interaction;Pertussis;PI3K-Akt signaling pathway;Phagosome;Toxoplasmosis;Focal adhesion;Dilated cardiomyopathy;Pathogenic Es…
Nipal1	ENSMUSG00000067219		0.301645	0.000112701	0.000481311		0.925524	1.26e-56	1.14e-53		GO:0016020//membrane;GO:0016021//integral component of membrane	GO:0015693//magnesium ion transport;GO:0006810//transport;GO:0006811//ion transport;GO:1903830//magnesium ion transmembrane transport	GO:0015095//magnesium ion transmembrane transporter activity	-
Nkrf	ENSMUSG00000044149		0.250956	0.0162645	0.0428752		0.456312	3.33e-07	5.66e-06		GO:0005634//nucleus;GO:0005730//nucleolus	GO:0006366//transcription from RNA polymerase II promoter;GO:0045944//positive regulation of transcription from RNA polymerase II promoter;GO:0006351//transcription, DNA-templated;GO:0006355//regulation of transcription, DNA-templated;GO:0045892//negative regulation of transcription, DNA-templated	GO:0003723//RNA binding;GO:0003677//DNA binding;GO:0003676//nucleic acid binding;GO:0001077//transcriptional activator activity, RNA polymerase II core promoter proximal region sequence-specific binding;GO:0000978//RNA polymerase II core promoter proximal region sequence-specific DNA binding	-
Nmd3	ENSMUSG00000027787		0.387729	1.71e-06	9.71e-06		0.164682	0.00299127	0.0152724		GO:0005730//nucleolus;GO:0005654//nucleoplasm;GO:0016020//membrane;GO:0005634//nucleus;GO:0005737//cytoplasm	GO:1904751//positive regulation of protein localization to nucleolus;GO:0000055//ribosomal large subunit export from nucleus;GO:0015031//protein transport;GO:0032092//positive regulation of protein binding;GO:0006810//transport;GO:1902680//positive regulation of RNA biosynthetic process	GO:0030674//protein binding, bridging;GO:0003723//RNA binding;GO:0043023//ribosomal large subunit binding	K07562//RNA transport;Ribosome biogenesis in eukaryotes
Nme1	ENSMUSG00000037601		0.435068	4.71e-09	3.55e-08		0.296036	5.52e-06	6.86e-05		GO:0005813//centrosome;GO:0005882//intermediate filament;GO:0016020//membrane;GO:0032587//ruffle membrane;GO:0005829//cytosol;GO:0005634//nucleus;GO:0043209//myelin sheath;GO:0005741//mitochondrial outer membrane;GO:0005739//mitochondrion;GO:0070062//extracellular exosome;GO:0005737//cytoplasm;GO:0048471//perinuclear region of cytoplasm	GO:0051591//response to cAMP;GO:0006241//CTP biosynthetic process;GO:0006165//nucleoside diphosphate phosphorylation;GO:0002762//negative regulation of myeloid leukocyte differentiation;GO:0010976//positive regulation of neuron projection development;GO:0021766//hippocampus development;GO:0006259//DNA metabolic process;GO:0010629//negative regulation of gene expression;GO:0030879//mammary gland d…	GO:0004536//deoxyribonuclease activity;GO:0005525//GTP binding;GO:0019899//enzyme binding;GO:0000166//nucleotide binding;GO:0019901//protein kinase binding;GO:0000977//RNA polymerase II regulatory region sequence-specific DNA binding;GO:0000287//magnesium ion binding;GO:0042802//identical protein binding;GO:0016740//transferase activity;GO:0005524//ATP binding;GO:0004550//nucleoside diphosphate k…	K00940//Biosynthesis of antibiotics;Biosynthesis of secondary metabolites;Purine metabolism;Metabolic pathways;Pyrimidine metabolism
Nmt2	ENSMUSG00000026643		0.530488	5.1e-12	4.98e-11		0.512149	7.03e-23	7.98e-21		GO:0005737//cytoplasm;GO:0016020//membrane;GO:0005829//cytosol;GO:0005886//plasma membrane;GO:0005794//Golgi apparatus;GO:0019898//extrinsic component of membrane	GO:0018008//N-terminal peptidyl-glycine N-myristoylation;GO:0006499//N-terminal protein myristoylation	GO:0004379//glycylpeptide N-tetradecanoyltransferase activity;GO:0016746//transferase activity, transferring acyl groups;GO:0016740//transferase activity	-
Nnmt	ENSMUSG00000032271		0.864604	6.71e-13	7.05e-12		0.25175	0.00173613	0.00976369		GO:0005829//cytosol;GO:0005737//cytoplasm	GO:0042493//response to drug;GO:0031100//animal organ regeneration;GO:0032259//methylation;GO:0010243//response to organonitrogen compound	GO:0008168//methyltransferase activity;GO:0016740//transferase activity;GO:0008112//nicotinamide N-methyltransferase activity	K00541//Metabolic pathways;Nicotinate and nicotinamide metabolism
Nrp2	ENSMUSG00000025969		0.478854	8.96e-17	1.22e-15		0.321774	1.67e-10	5.33e-09		GO:0030424//axon;GO:0016021//integral component of membrane;GO:0005886//plasma membrane;GO:0016020//membrane	GO:0007399//nervous system development;GO:0001764//neuron migration;GO:0097491//sympathetic neuron projection guidance;GO:1904835//dorsal root ganglion morphogenesis;GO:0050919//negative chemotaxis;GO:0007411//axon guidance;GO:0021649//vestibulocochlear nerve structural organization;GO:0001525//angiogenesis;GO:0003148//outflow tract septum morphogenesis;GO:0097374//sensory neuron axon guidance;GO…	GO:0005515//protein binding;GO:0042802//identical protein binding;GO:0017154//semaphorin receptor activity;GO:0008201//heparin binding;GO:0005021//vascular endothelial growth factor-activated receptor activity;GO:0046872//metal ion binding	K06756//Cell adhesion molecules (CAMs)
Nsun2	ENSMUSG00000021595		0.172165	0.0033915	0.0107419		0.278494	5.17e-08	1.04e-06		GO:0005856//cytoskeleton;GO:0005737//cytoplasm;GO:0005634//nucleus;GO:0005819//spindle;GO:0033391//chromatoid body;GO:0005730//nucleolus	GO:0030488//tRNA methylation;GO:0033313//meiotic cell cycle checkpoint;GO:0032259//methylation;GO:0007049//cell cycle;GO:0051301//cell division;GO:0048820//hair follicle maturation;GO:0008033//tRNA processing;GO:0007286//spermatid development	GO:0008168//methyltransferase activity;GO:0003723//RNA binding;GO:0000049//tRNA binding;GO:0016428//tRNA (cytosine-5-)-methyltransferase activity;GO:0016740//transferase activity	-
Nudt4	ENSMUSG00000020029		0.265265	2e-06	1.12e-05		0.299982	1.42e-08	3.21e-07		GO:0005737//cytoplasm;GO:0005634//nucleus;GO:0005829//cytosol	GO:1901909//diadenosine hexaphosphate catabolic process;GO:1901911//adenosine 5'-(hexahydrogen pentaphosphate) catabolic process;GO:0071543//diphosphoinositol polyphosphate metabolic process;GO:1901907//diadenosine pentaphosphate catabolic process	GO:0052844//inositol-3-diphosphate-1,2,4,5,6-pentakisphosphate diphosphatase activity;GO:0052845//inositol-5-diphosphate-1,2,3,4,6-pentakisphosphate diphosphatase activity;GO:0016787//hydrolase activity;GO:0034432//bis(5'-adenosyl)-pentaphosphatase activity;GO:0052843//inositol-1-diphosphate-2,3,4,5,6-pentakisphosphate diphosphatase activity;GO:0052847//inositol-1,5-bisdiphosphate-2,3,4,6-tetraki…	-
Nudt9	ENSMUSG00000029310		0.614489	5.66e-17	7.79e-16		0.318739	1.68e-08	3.72e-07		GO:0070062//extracellular exosome;GO:0031965//nuclear membrane;GO:0005739//mitochondrion;GO:0030054//cell junction	GO:0046032//ADP catabolic process;GO:0046709//IDP catabolic process	GO:0047631//ADP-ribose diphosphatase activity;GO:0016787//hydrolase activity;GO:0043262//adenosine-diphosphatase activity	K13988//Purine metabolism
Nufip1	ENSMUSG00000022009		0.226825	0.001817	0.00615235		0.17572	0.0110084	0.043936		GO:0008023//transcription elongation factor complex;GO:0005634//nucleus;GO:0048786//presynaptic active zone;GO:0005730//nucleolus;GO:0005726//perichromatin fibrils;GO:0043234//protein complex;GO:0022626//cytosolic ribosome;GO:0070761//pre-snoRNP complex;GO:0001650//fibrillar center;GO:0016363//nuclear matrix	GO:0051259//protein oligomerization;GO:0045944//positive regulation of transcription from RNA polymerase II promoter;GO:0000492//box C/D snoRNP assembly	GO:0003676//nucleic acid binding;GO:0030674//protein binding, bridging;GO:0030515//snoRNA binding;GO:0051117//ATPase binding;GO:0046872//metal ion binding;GO:0042802//identical protein binding;GO:0005515//protein binding;GO:0003723//RNA binding	-
Nup160	ENSMUSG00000051329		0.297385	3.91e-05	0.000180411		0.162475	0.0100886	0.0410008		GO:0005643//nuclear pore;GO:0005634//nucleus;GO:0031080//nuclear pore outer ring;GO:0000776//kinetochore	GO:0006810//transport;GO:0015031//protein transport;GO:0006406//mRNA export from nucleus;GO:0051028//mRNA transport	GO:0005487//nucleocytoplasmic transporter activity	K14303//RNA transport
Nup54	ENSMUSG00000034826		0.159043	0.0123149	0.0336469		0.264854	3.24e-05	0.000328066		GO:0043234//protein complex;GO:0005635//nuclear envelope;GO:0016020//membrane;GO:0005643//nuclear pore;GO:0005634//nucleus;GO:0044613//nuclear pore central transport channel;GO:0031965//nuclear membrane	GO:0051028//mRNA transport;GO:0006913//nucleocytoplasmic transport;GO:0051290//protein heterotetramerization;GO:0006810//transport;GO:0051291//protein heterooligomerization;GO:0006607//NLS-bearing protein import into nucleus;GO:0015031//protein transport;GO:0051260//protein homooligomerization;GO:0042306//regulation of protein import into nucleus;GO:0070208//protein heterotrimerization;GO:0006605…	GO:0005487//nucleocytoplasmic transporter activity;GO:0017056//structural constituent of nuclear pore	K14308//RNA transport
Oasl1	ENSMUSG00000041827		0.647392	0.000120377	0.000511874		0.348312	0.000962436	0.00600081		GO:0005737//cytoplasm;GO:0016020//membrane;GO:0005634//nucleus;GO:0005829//cytosol;GO:0005654//nucleoplasm;GO:0005730//nucleolus	GO:0051607//defense response to virus;GO:0002376//immune system process;GO:0045087//innate immune response;GO:0006955//immune response;GO:0045071//negative regulation of viral genome replication;GO:0009615//response to virus	GO:0003725//double-stranded RNA binding;GO:0003723//RNA binding;GO:0016740//transferase activity;GO:0003677//DNA binding;GO:0005524//ATP binding	-
Pacsin2	ENSMUSG00000016664		0.290601	2.4e-08	1.67e-07		0.238061	3.8e-07	6.34e-06		GO:0005737//cytoplasm;GO:0005901//caveola;GO:0016607//nuclear speck;GO:0031410//cytoplasmic vesicle;GO:0032587//ruffle membrane;GO:0016020//membrane;GO:0055038//recycling endosome membrane;GO:0005856//cytoskeleton;GO:0005769//early endosome;GO:0005768//endosome;GO:0042995//cell projection;GO:0043231//intracellular membrane-bounded organelle;GO:0005911//cell-cell junction;GO:0070062//extracellular…	GO:0097320//plasma membrane tubulation;GO:0048858//cell projection morphogenesis;GO:0030036//actin cytoskeleton organization;GO:0006897//endocytosis;GO:0036010//protein localization to endosome;GO:0007165//signal transduction;GO:0072584//caveolin-mediated endocytosis;GO:0045806//negative regulation of endocytosis;GO:0016310//phosphorylation;GO:0070836//caveola assembly	GO:0008289//lipid binding;GO:0008092//cytoskeletal protein binding;GO:0016301//kinase activity;GO:0045296//cadherin binding;GO:0005515//protein binding;GO:0070300//phosphatidic acid binding;GO:0042802//identical protein binding	-
Pappa2	ENSMUSG00000073530		0.966107	6.5e-06	3.41e-05		0.656229	0.000110554	0.00094471		GO:0070062//extracellular exosome;GO:0016324//apical plasma membrane;GO:0005829//cytosol	GO:0009651//response to salt stress;GO:0006508//proteolysis;GO:0060349//bone morphogenesis	GO:0008237//metallopeptidase activity;GO:0004222//metalloendopeptidase activity;GO:0008270//zinc ion binding	-
Pbdc1	ENSMUSG00000031226		0.279807	6.72e-05	0.000298357		0.205105	0.00207763	0.0112666		GO:0005737//cytoplasm	-	-	-
Pcbp3	ENSMUSG00000001120		0.338071	0.00623548	0.0185099		0.343625	0.00156931	0.00897157		GO:0030529//intracellular ribonucleoprotein complex;GO:0070062//extracellular exosome;GO:0005737//cytoplasm;GO:0005634//nucleus;GO:0005829//cytosol	GO:0000122//negative regulation of transcription from RNA polymerase II promoter	GO:0003723//RNA binding;GO:1990829//C-rich single-stranded DNA binding;GO:0003677//DNA binding;GO:0001227//transcriptional repressor activity, RNA polymerase II transcription regulatory region sequence-specific binding;GO:0003676//nucleic acid binding;GO:0003690//double-stranded DNA binding	-
Pdss1	ENSMUSG00000026784		0.479453	0.000346598	0.00135885		0.497739	6.5e-06	7.94e-05		GO:1990234//transferase complex;GO:0005739//mitochondrion	GO:0006744//ubiquinone biosynthetic process;GO:0051290//protein heterotetramerization;GO:0008299//isoprenoid biosynthetic process	GO:0050347//trans-octaprenyltranstransferase activity;GO:0016740//transferase activity;GO:0046872//metal ion binding;GO:0046982//protein heterodimerization activity;GO:0000010//trans-hexaprenyltranstransferase activity	K12504//Biosynthesis of secondary metabolites;Terpenoid backbone biosynthesis
Peli2	ENSMUSG00000021846		1.00615	5.36e-33	1.44e-31		0.1918	0.00813597	0.034382		-	GO:0043410//positive regulation of MAPK cascade;GO:0001934//positive regulation of protein phosphorylation;GO:0008063//Toll signaling pathway	-	-
Pfas	ENSMUSG00000020899		0.556967	1.02e-12	1.05e-11		0.186624	0.00327183	0.0164259		GO:0005737//cytoplasm;GO:0070062//extracellular exosome	GO:0006541//glutamine metabolic process;GO:0042493//response to drug;GO:0009156//ribonucleoside monophosphate biosynthetic process;GO:0006189//'de novo' IMP biosynthetic process;GO:0006164//purine nucleotide biosynthetic process	GO:0016874//ligase activity;GO:0005524//ATP binding;GO:0000166//nucleotide binding;GO:0046872//metal ion binding;GO:0004642//phosphoribosylformylglycinamidine synthase activity	K01952//Metabolic pathways;Purine metabolism;Biosynthesis of secondary metabolites;Biosynthesis of antibiotics
Phc2	ENSMUSG00000028796		0.367147	5.98e-08	4.02e-07		0.829424	3.89e-30	7.81e-28		GO:0005634//nucleus;GO:0031519//PcG protein complex;GO:0000792//heterochromatin;GO:0005654//nucleoplasm;GO:0035102//PRC1 complex	GO:0007283//spermatogenesis;GO:0007275//multicellular organism development	GO:0046872//metal ion binding;GO:0005515//protein binding;GO:0003677//DNA binding;GO:0008270//zinc ion binding;GO:0042802//identical protein binding	-
Phf6	ENSMUSG00000025626		0.171547	0.00102954	0.00368489		0.173983	0.000819173	0.00523626		GO:0005634//nucleus;GO:0000776//kinetochore;GO:0000777//condensed chromosome kinetochore;GO:0000775//chromosome, centromeric region;GO:0005694//chromosome;GO:0005730//nucleolus;GO:0005654//nucleoplasm	GO:0000122//negative regulation of transcription from RNA polymerase II promoter;GO:0006351//transcription, DNA-templated;GO:0006355//regulation of transcription, DNA-templated	GO:0043565//sequence-specific DNA binding;GO:0043021//ribonucleoprotein complex binding;GO:0019899//enzyme binding;GO:0003723//RNA binding;GO:0097110//scaffold protein binding;GO:0015631//tubulin binding;GO:0042393//histone binding;GO:0003677//DNA binding;GO:0001227//transcriptional repressor activity, RNA polymerase II transcription regulatory region sequence-specific binding;GO:0051219//phospho…	-
Pik3r5	ENSMUSG00000020901		0.717318	3.17e-09	2.42e-08		0.319172	0.00312728	0.0158374		GO:0005737//cytoplasm;GO:0005942//phosphatidylinositol 3-kinase complex;GO:0005886//plasma membrane;GO:0005944//phosphatidylinositol 3-kinase complex, class IB;GO:0005634//nucleus;GO:0005829//cytosol;GO:0005815//microtubule organizing center;GO:0016020//membrane	GO:0051897//positive regulation of protein kinase B signaling;GO:0043551//regulation of phosphatidylinositol 3-kinase activity;GO:0014065//phosphatidylinositol 3-kinase signaling;GO:0007186//G-protein coupled receptor signaling pathway;GO:0043406//positive regulation of MAP kinase activity;GO:0016310//phosphorylation	GO:0016301//kinase activity;GO:0031683//G-protein beta/gamma-subunit complex binding;GO:0046935//1-phosphatidylinositol-3-kinase regulator activity	K02649//Apoptosis;Phosphatidylinositol signaling system;Natural killer cell mediated cytotoxicity;Glioma;Rap1 signaling pathway;Chagas disease (American trypanosomiasis);Cholinergic synapse;Non-small cell lung cancer;mTOR signaling pathway;Jak-STAT signaling pathway;cGMP-PKG signaling pathway;Osteoclast differentiation;Colorectal cancer;PI3K-Akt signaling pathway;Carbohydrate digestion and absorp…
Pim1	ENSMUSG00000024014		0.351649	9.82e-07	5.76e-06		0.156533	0.00726634	0.0314688		GO:0005737//cytoplasm;GO:0005829//cytosol;GO:0005634//nucleus;GO:0005730//nucleolus	GO:0070561//vitamin D receptor signaling pathway;GO:0060045//positive regulation of cardiac muscle cell proliferation;GO:0030212//hyaluronan metabolic process;GO:0046777//protein autophosphorylation;GO:0043433//negative regulation of sequence-specific DNA binding transcription factor activity;GO:0008283//cell proliferation;GO:1905062//positive regulation of cardioblast proliferation;GO:0043066//n…	GO:0004672//protein kinase activity;GO:0008134//transcription factor binding;GO:0004674//protein serine/threonine kinase activity;GO:0005524//ATP binding;GO:0030145//manganese ion binding;GO:0000166//nucleotide binding;GO:0043024//ribosomal small subunit binding	K04702//Acute myeloid leukemia;MicroRNAs in cancer;Jak-STAT signaling pathway
Pitpna	ENSMUSG00000017781		0.186478	0.000600374	0.00224956		0.126636	0.00979814	0.0400611		GO:0043209//myelin sheath;GO:0005622//intracellular;GO:0070062//extracellular exosome;GO:0016021//integral component of membrane;GO:0005737//cytoplasm;GO:0005829//cytosol	GO:0015914//phospholipid transport;GO:0006810//transport;GO:0007409//axonogenesis	GO:0035091//phosphatidylinositol binding;GO:0031210//phosphatidylcholine binding;GO:0008525//phosphatidylcholine transporter activity;GO:0005548//phospholipid transporter activity;GO:0008289//lipid binding;GO:0005543//phospholipid binding;GO:0008526//phosphatidylinositol transporter activity	-
Pkd2	ENSMUSG00000034462		1.09362	1.47e-49	6.25e-48		0.951073	1.52e-47	7.97e-45		GO:0005887//integral component of plasma membrane;GO:0060170//ciliary membrane;GO:0031410//cytoplasmic vesicle;GO:0071458//integral component of cytoplasmic side of endoplasmic reticulum membrane;GO:0031514//motile cilium;GO:0005737//cytoplasm;GO:0005789//endoplasmic reticulum membrane;GO:0030027//lamellipodium;GO:0072686//mitotic spindle;GO:0005929//cilium;GO:0036064//ciliary basal body;GO:00160…	GO:0001822//kidney development;GO:0007507//heart development;GO:0060315//negative regulation of ryanodine-sensitive calcium-release channel activity;GO:0007050//cell cycle arrest;GO:0021510//spinal cord development;GO:0007204//positive regulation of cytosolic calcium ion concentration;GO:0001658//branching involved in ureteric bud morphogenesis;GO:0045944//positive regulation of transcription fro…	GO:0005509//calcium ion binding;GO:0015271//outward rectifier potassium channel activity;GO:0048763//calcium-induced calcium release activity;GO:0042802//identical protein binding;GO:0051117//ATPase binding;GO:0046872//metal ion binding;GO:0022843//voltage-gated cation channel activity;GO:0042805//actinin binding;GO:0051393//alpha-actinin binding;GO:0005102//receptor binding;GO:0005267//potassium…	-
Plau	ENSMUSG00000021822		0.410831	7.22e-10	5.9e-09		0.968209	1.5e-77	2.22e-74		GO:0005576//extracellular region;GO:0005615//extracellular space;GO:0009986//cell surface;GO:0070062//extracellular exosome;GO:0005925//focal adhesion	GO:0033628//regulation of cell adhesion mediated by integrin;GO:2000097//regulation of smooth muscle cell-matrix adhesion;GO:0001666//response to hypoxia;GO:0016310//phosphorylation;GO:0006508//proteolysis;GO:0031639//plasminogen activation;GO:0042730//fibrinolysis;GO:0030335//positive regulation of cell migration;GO:0010469//regulation of receptor activity;GO:0014909//smooth muscle cell migratio…	GO:0008233//peptidase activity;GO:0016787//hydrolase activity;GO:0016301//kinase activity;GO:0005515//protein binding;GO:0004252//serine-type endopeptidase activity;GO:0008236//serine-type peptidase activity	K01348//Transcriptional misregulation in cancer;Complement and coagulation cascades;NF-kappa B signaling pathway;Proteoglycans in cancer;MicroRNAs in cancer
Plce1	ENSMUSG00000024998		0.274732	0.000965453	0.00347329		0.25337	0.00143353	0.00833624		GO:0005737//cytoplasm;GO:0016020//membrane;GO:0005829//cytosol;GO:0005886//plasma membrane;GO:0000139//Golgi membrane;GO:0005794//Golgi apparatus;GO:0005622//intracellular	GO:0032835//glomerulus development;GO:0007264//small GTPase mediated signal transduction;GO:0016042//lipid catabolic process;GO:0006629//lipid metabolic process;GO:0000187//activation of MAPK activity;GO:0065009//regulation of molecular function;GO:0007200//phospholipase C-activating G-protein coupled receptor signaling pathway;GO:0046578//regulation of Ras protein signal transduction;GO:0035556/…	GO:0005085//guanyl-nucleotide exchange factor activity;GO:0008081//phosphoric diester hydrolase activity;GO:0046872//metal ion binding;GO:0004435//phosphatidylinositol phospholipase C activity;GO:0004629//phospholipase C activity;GO:0016787//hydrolase activity;GO:0019899//enzyme binding;GO:0004871//signal transducer activity;GO:0005515//protein binding	K05860//Rap1 signaling pathway;Inositol phosphate metabolism;Thyroid hormone signaling pathway;Metabolic pathways;Phosphatidylinositol signaling system;cAMP signaling pathway;Ras signaling pathway;Proteoglycans in cancer;Calcium signaling pathway
Plekhm1	ENSMUSG00000034247		0.283712	0.0155827	0.0413143		0.349108	0.000570591	0.00384178		GO:0005730//nucleolus;GO:0005765//lysosomal membrane;GO:0010008//endosome membrane;GO:0005768//endosome;GO:0005764//lysosome;GO:0005737//cytoplasm;GO:0043231//intracellular membrane-bounded organelle;GO:0016020//membrane	GO:0006810//transport;GO:0035556//intracellular signal transduction;GO:0032418//lysosome localization;GO:0045780//positive regulation of bone resorption;GO:0006914//autophagy;GO:1900029//positive regulation of ruffle assembly;GO:0015031//protein transport	GO:0005515//protein binding;GO:0046872//metal ion binding	-
Plin2	ENSMUSG00000028494		0.280311	0.00220012	0.00731718		0.32144	4.83e-06	6.11e-05		GO:0005737//cytoplasm;GO:0005811//lipid droplet;GO:0016020//membrane;GO:0005886//plasma membrane;GO:0005634//nucleus;GO:0005829//cytosol	GO:0014070//response to organic cyclic compound;GO:0019915//lipid storage;GO:0042493//response to drug;GO:0015909//long-chain fatty acid transport	GO:0005515//protein binding	-
Plscr1	ENSMUSG00000032369		0.539083	1.27e-11	1.2e-10		0.433768	1.45e-10	4.67e-09		GO:0016021//integral component of membrane;GO:0031012//extracellular matrix;GO:0045121//membrane raft;GO:0005794//Golgi apparatus;GO:0070062//extracellular exosome;GO:0005887//integral component of plasma membrane;GO:0005730//nucleolus;GO:0005886//plasma membrane;GO:0005829//cytosol;GO:0005634//nucleus;GO:0016020//membrane	GO:0006659//phosphatidylserine biosynthetic process;GO:0017121//phospholipid scrambling;GO:0010628//positive regulation of gene expression;GO:0071222//cellular response to lipopolysaccharide;GO:0006915//apoptotic process;GO:0006366//transcription from RNA polymerase II promoter;GO:0035456//response to interferon-beta;GO:0045944//positive regulation of transcription from RNA polymerase II promoter…	GO:0005154//epidermal growth factor receptor binding;GO:0001077//transcriptional activator activity, RNA polymerase II core promoter proximal region sequence-specific binding;GO:0042609//CD4 receptor binding;GO:0003677//DNA binding;GO:0017124//SH3 domain binding;GO:0005509//calcium ion binding;GO:0019899//enzyme binding;GO:0017128//phospholipid scramblase activity	-
Pml	ENSMUSG00000036986		0.426481	4.23e-05	0.0001942		0.30839	2.02e-09	5.32e-08		GO:0016020//membrane;GO:0005634//nucleus;GO:0042406//extrinsic component of endoplasmic reticulum membrane;GO:0031965//nuclear membrane;GO:0005622//intracellular;GO:0016605//PML body;GO:0005737//cytoplasm;GO:0005789//endoplasmic reticulum membrane;GO:0000792//heterochromatin;GO:0005654//nucleoplasm;GO:0005829//cytosol;GO:0000784//nuclear chromosome, telomeric region;GO:0005730//nucleolus;GO:00319…	GO:0032211//negative regulation of telomere maintenance via telomerase;GO:2000779//regulation of double-strand break repair;GO:0045930//negative regulation of mitotic cell cycle;GO:0048146//positive regulation of fibroblast proliferation;GO:0051457//maintenance of protein location in nucleus;GO:0048384//retinoic acid receptor signaling pathway;GO:0032206//positive regulation of telomere maintenan…	GO:0003713//transcription coactivator activity;GO:0008270//zinc ion binding;GO:0003677//DNA binding;GO:0005515//protein binding;GO:0050897//cobalt ion binding;GO:0042803//protein homodimerization activity;GO:0046332//SMAD binding;GO:0032183//SUMO binding;GO:0046982//protein heterodimerization activity;GO:0046872//metal ion binding;GO:0031625//ubiquitin protein ligase binding	K10054//Transcriptional misregulation in cancer;Endocytosis;Pathways in cancer;Ubiquitin mediated proteolysis;Herpes simplex infection;Acute myeloid leukemia;Influenza A
Polr1a	ENSMUSG00000049553		0.486301	3.02e-13	3.26e-12		0.139408	0.00609355	0.0272924		GO:0005736//DNA-directed RNA polymerase I complex;GO:0005730//nucleolus;GO:0005654//nucleoplasm;GO:0005634//nucleus	GO:0000183//chromatin silencing at rDNA;GO:0006351//transcription, DNA-templated;GO:1904750//negative regulation of protein localization to nucleolus;GO:0006360//transcription from RNA polymerase I promoter	GO:0046872//metal ion binding;GO:0003682//chromatin binding;GO:0016740//transferase activity;GO:0003677//DNA binding;GO:0005515//protein binding;GO:0001054//RNA polymerase I activity;GO:0008270//zinc ion binding;GO:0003899//DNA-directed 5'-3' RNA polymerase activity;GO:0016779//nucleotidyltransferase activity	K02999//Metabolic pathways;Pyrimidine metabolism;Purine metabolism;RNA polymerase
Polr1b	ENSMUSG00000027395		0.359984	0.000616278	0.00230278		0.382259	6.34e-07	1.01e-05		GO:0005634//nucleus;GO:0005829//cytosol;GO:0005730//nucleolus;GO:0005654//nucleoplasm;GO:0005736//DNA-directed RNA polymerase I complex	GO:0009303//rRNA transcription;GO:0006360//transcription from RNA polymerase I promoter;GO:0017126//nucleologenesis;GO:0007566//embryo implantation;GO:0000183//chromatin silencing at rDNA;GO:0006351//transcription, DNA-templated	GO:0046872//metal ion binding;GO:0016779//nucleotidyltransferase activity;GO:0003899//DNA-directed 5'-3' RNA polymerase activity;GO:0016740//transferase activity;GO:0032549//ribonucleoside binding;GO:0001054//RNA polymerase I activity;GO:0005515//protein binding;GO:0003677//DNA binding	K03002//RNA polymerase;Purine metabolism;Pyrimidine metabolism;Metabolic pathways
Polr1e	ENSMUSG00000028318		0.336295	0.000111035	0.000475133		0.298875	7.47e-05	0.000676484		GO:0001650//fibrillar center;GO:0005634//nucleus;GO:0005736//DNA-directed RNA polymerase I complex;GO:0005730//nucleolus;GO:0005654//nucleoplasm	GO:0001189//RNA polymerase I transcriptional preinitiation complex assembly at the promoter for the nuclear large rRNA transcript;GO:0000183//chromatin silencing at rDNA;GO:0006351//transcription, DNA-templated	GO:0003899//DNA-directed 5'-3' RNA polymerase activity;GO:0001179//RNA polymerase I transcription factor binding;GO:0005515//protein binding;GO:0001054//RNA polymerase I activity;GO:0003677//DNA binding	K03005//Metabolic pathways;Pyrimidine metabolism;RNA polymerase;Purine metabolism
Por	ENSMUSG00000005514		0.777402	1.2e-46	4.75e-45		0.288562	1.09e-09	2.99e-08		GO:0005739//mitochondrion;GO:0016020//membrane;GO:0005783//endoplasmic reticulum;GO:0005789//endoplasmic reticulum membrane;GO:0043231//intracellular membrane-bounded organelle;GO:0016021//integral component of membrane	GO:0055114//oxidation-reduction process;GO:0003420//regulation of growth plate cartilage chondrocyte proliferation;GO:0019395//fatty acid oxidation;GO:0007584//response to nutrient;GO:0032332//positive regulation of chondrocyte differentiation;GO:0046210//nitric oxide catabolic process;GO:0018393//internal peptidyl-lysine acetylation;GO:0060192//negative regulation of lipase activity;GO:0071375//…	GO:0016491//oxidoreductase activity;GO:0019899//enzyme binding;GO:0016787//hydrolase activity;GO:0004128//cytochrome-b5 reductase activity, acting on NAD(P)H;GO:0009055//electron carrier activity;GO:0050660//flavin adenine dinucleotide binding;GO:0050661//NADP binding;GO:0003958//NADPH-hemoprotein reductase activity;GO:0010181//FMN binding;GO:0047726//iron-cytochrome-c reductase activity;GO:00089…	-
Pparg	ENSMUSG00000000440		2.0616	8.78e-70	5.8e-68		0.781838	1.18e-24	1.66e-22		GO:0043231//intracellular membrane-bounded organelle;GO:0005737//cytoplasm;GO:0090575//RNA polymerase II transcription factor complex;GO:0048471//perinuclear region of cytoplasm;GO:0043234//protein complex;GO:0005829//cytosol;GO:0005634//nucleus	GO:0055098//response to low-density lipoprotein particle stimulus;GO:0006351//transcription, DNA-templated;GO:0042593//glucose homeostasis;GO:0009409//response to cold;GO:0042493//response to drug;GO:0033993//response to lipid;GO:0010887//negative regulation of cholesterol storage;GO:0002674//negative regulation of acute inflammatory response;GO:0051974//negative regulation of telomerase activity…	GO:0043565//sequence-specific DNA binding;GO:0019899//enzyme binding;GO:0008134//transcription factor binding;GO:0030374//ligand-dependent nuclear receptor transcription coactivator activity;GO:0050692//DBD domain binding;GO:0008270//zinc ion binding;GO:0030331//estrogen receptor binding;GO:0033613//activating transcription factor binding;GO:0042277//peptide binding;GO:0046982//protein heterodime…	K08530//AMPK signaling pathway;Pathways in cancer;Transcriptional misregulation in cancer;PPAR signaling pathway;Osteoclast differentiation;Thyroid cancer;Huntington's disease
Ppat	ENSMUSG00000029246		0.171269	0.0145557	0.0388624		0.391486	1.76e-10	5.6e-09		-	GO:0009113//purine nucleobase biosynthetic process;GO:0032869//cellular response to insulin stimulus;GO:0009116//nucleoside metabolic process;GO:0006189//'de novo' IMP biosynthetic process;GO:0006164//purine nucleotide biosynthetic process;GO:0001822//kidney development;GO:0051289//protein homotetramerization;GO:0009168//purine ribonucleoside monophosphate biosynthetic process;GO:0007595//lactati…	GO:0046872//metal ion binding;GO:0004044//amidophosphoribosyltransferase activity;GO:0016757//transferase activity, transferring glycosyl groups;GO:0051536//iron-sulfur cluster binding;GO:0016740//transferase activity	K00764//Alanine, aspartate and glutamate metabolism;Biosynthesis of antibiotics;Biosynthesis of secondary metabolites;Purine metabolism;Metabolic pathways
Ppif	ENSMUSG00000021868		0.416398	1.38e-05	6.83e-05		0.254069	0.00979109	0.0400424		GO:0005753//mitochondrial proton-transporting ATP synthase complex;GO:0005757//mitochondrial permeability transition pore complex;GO:0005739//mitochondrion;GO:0005743//mitochondrial inner membrane;GO:0005759//mitochondrial matrix	GO:0010849//regulation of proton-transporting ATPase activity, rotational mechanism;GO:0010939//regulation of necrotic cell death;GO:2000276//negative regulation of oxidative phosphorylation uncoupler activity;GO:1902686//mitochondrial outer membrane permeabilization involved in programmed cell death;GO:0032780//negative regulation of ATPase activity;GO:0090324//negative regulation of oxidative p…	GO:0016853//isomerase activity;GO:0005515//protein binding;GO:0016018//cyclosporin A binding;GO:0042277//peptide binding;GO:0003755//peptidyl-prolyl cis-trans isomerase activity	K09565//Toxoplasmosis;Parkinson's disease;Calcium signaling pathway;cGMP-PKG signaling pathway;Huntington's disease
Ppm1d	ENSMUSG00000020525		1.21095	1.09e-57	5.56e-56		0.27475	2.51e-05	0.000263814		GO:0005634//nucleus;GO:0005829//cytosol	GO:0006306//DNA methylation;GO:0000086//G2/M transition of mitotic cell cycle;GO:0009617//response to bacterium;GO:0009267//cellular response to starvation;GO:0007049//cell cycle;GO:0035970//peptidyl-threonine dephosphorylation;GO:0006470//protein dephosphorylation;GO:0006342//chromatin silencing	GO:0046872//metal ion binding;GO:0004721//phosphoprotein phosphatase activity;GO:0051019//mitogen-activated protein kinase binding;GO:0004722//protein serine/threonine phosphatase activity;GO:0016787//hydrolase activity;GO:0004724//magnesium-dependent protein serine/threonine phosphatase activity;GO:0003824//catalytic activity;GO:0043169//cation binding	K10147//p53 signaling pathway
Preb	ENSMUSG00000045302		0.876996	6.59e-62	3.65e-60		0.282858	9.67e-10	2.69e-08		GO:0000139//Golgi membrane;GO:0030176//integral component of endoplasmic reticulum membrane;GO:0016020//membrane;GO:0005634//nucleus;GO:0005789//endoplasmic reticulum membrane;GO:0016021//integral component of membrane;GO:0070971//endoplasmic reticulum exit site;GO:0005783//endoplasmic reticulum	GO:0048208//COPII vesicle coating;GO:0015031//protein transport;GO:0065009//regulation of molecular function;GO:0032527//protein exit from endoplasmic reticulum;GO:0009306//protein secretion;GO:0006888//ER to Golgi vesicle-mediated transport;GO:0003400//regulation of COPII vesicle coating;GO:0043547//positive regulation of GTPase activity;GO:0006810//transport;GO:0006351//transcription, DNA-templ…	GO:0005090//Sar guanyl-nucleotide exchange factor activity;GO:0005096//GTPase activator activity;GO:0003700//transcription factor activity, sequence-specific DNA binding;GO:0003677//DNA binding;GO:0051020//GTPase binding	K14003//Protein processing in endoplasmic reticulum
Prg4	ENSMUSG00000006014		4.43588	5.42e-13	5.74e-12		0.665353	0.006226	0.0277936		GO:0031012//extracellular matrix	GO:0006955//immune response;GO:0006898//receptor-mediated endocytosis	GO:0005044//scavenger receptor activity;GO:0030247//polysaccharide binding	-
Prkg2	ENSMUSG00000029334		0.773905	3.79e-08	2.6e-07		1.28327	1.5e-45	7.37e-43		GO:0031965//nuclear membrane;GO:0016020//membrane	GO:2001226//negative regulation of chloride transport;GO:0036289//peptidyl-serine autophosphorylation;GO:0016310//phosphorylation;GO:0072659//protein localization to plasma membrane;GO:0006468//protein phosphorylation	GO:0016740//transferase activity;GO:0005524//ATP binding;GO:0030553//cGMP binding;GO:0004674//protein serine/threonine kinase activity;GO:0042803//protein homodimerization activity;GO:0000166//nucleotide binding;GO:0016301//kinase activity;GO:0004672//protein kinase activity;GO:0004692//cGMP-dependent protein kinase activity	K19477//Salivary secretion;Olfactory transduction;Regulation of lipolysis in adipocytes;Platelet activation;Gap junction;Renin secretion;Long-term depression;Circadian entrainment;cGMP-PKG signaling pathway
Prl2c2	ENSMUSG00000079092		1.50515	2.06e-25	4.2e-24		0.735444	7.02e-13	3.12e-11		GO:0005576//extracellular region;GO:0005783//endoplasmic reticulum;GO:0005615//extracellular space	GO:0045944//positive regulation of transcription from RNA polymerase II promoter;GO:0032534//regulation of microvillus assembly;GO:0031346//positive regulation of cell projection organization;GO:0010469//regulation of receptor activity;GO:0045662//negative regulation of myoblast differentiation;GO:0043536//positive regulation of blood vessel endothelial cell migration;GO:0002052//positive regulat…	GO:0005515//protein binding;GO:0008083//growth factor activity;GO:0005179//hormone activity	-
Prmt3	ENSMUSG00000030505		0.353912	5.88e-10	4.86e-09		0.288192	4.04e-08	8.29e-07		GO:0005840//ribosome;GO:0005737//cytoplasm;GO:0005829//cytosol	GO:0006355//regulation of transcription, DNA-templated;GO:0032259//methylation;GO:0031397//negative regulation of protein ubiquitination;GO:0034969//histone arginine methylation;GO:0006479//protein methylation;GO:0035246//peptidyl-arginine N-methylation;GO:0019919//peptidyl-arginine methylation, to asymmetrical-dimethyl arginine	GO:0016740//transferase activity;GO:0035242//protein-arginine omega-N asymmetric methyltransferase activity;GO:0005515//protein binding;GO:0008469//histone-arginine N-methyltransferase activity;GO:0016274//protein-arginine N-methyltransferase activity;GO:0008168//methyltransferase activity;GO:0046872//metal ion binding	-
Ptges	ENSMUSG00000050737		0.221209	0.000674925	0.00250121		0.777613	1.35e-40	5.11e-38		GO:0043231//intracellular membrane-bounded organelle;GO:0005737//cytoplasm;GO:0016021//integral component of membrane;GO:0048471//perinuclear region of cytoplasm;GO:0005641//nuclear envelope lumen;GO:0016020//membrane	GO:0006633//fatty acid biosynthetic process;GO:0008285//negative regulation of cell proliferation;GO:0006631//fatty acid metabolic process;GO:0002526//acute inflammatory response;GO:0032496//response to lipopolysaccharide;GO:0006693//prostaglandin metabolic process;GO:0006629//lipid metabolic process;GO:0034097//response to cytokine;GO:0051592//response to calcium ion;GO:0032526//response to reti…	GO:0004667//prostaglandin-D synthase activity;GO:0016853//isomerase activity;GO:0043295//glutathione binding;GO:0050220//prostaglandin-E synthase activity	K15729//Metabolic pathways;Arachidonic acid metabolism
Ptgir	ENSMUSG00000043017		1.35951	4.49e-07	2.74e-06		1.80183	2.5e-24	3.29e-22		GO:0016021//integral component of membrane;GO:0005829//cytosol;GO:0005886//plasma membrane;GO:0016020//membrane	GO:0007189//adenylate cyclase-activating G-protein coupled receptor signaling pathway;GO:0007165//signal transduction;GO:0030819//positive regulation of cAMP biosynthetic process;GO:0007186//G-protein coupled receptor signaling pathway;GO:0043950//positive regulation of cAMP-mediated signaling;GO:0048662//negative regulation of smooth muscle cell proliferation;GO:0032496//response to lipopolysacc…	GO:0004930//G-protein coupled receptor activity;GO:0004871//signal transducer activity;GO:0016501//prostacyclin receptor activity	K04263//Neuroactive ligand-receptor interaction;Vascular smooth muscle contraction;Platelet activation
Ptgs1	ENSMUSG00000047250		0.517884	6.17e-13	6.51e-12		0.399802	2.51e-14	1.31e-12		GO:0016020//membrane;GO:0031090//organelle membrane;GO:0005783//endoplasmic reticulum;GO:0001750//photoreceptor outer segment;GO:0043231//intracellular membrane-bounded organelle;GO:0005789//endoplasmic reticulum membrane;GO:0005737//cytoplasm;GO:0070062//extracellular exosome;GO:0005794//Golgi apparatus	GO:0001516//prostaglandin biosynthetic process;GO:0006979//response to oxidative stress;GO:0008217//regulation of blood pressure;GO:0006954//inflammatory response;GO:0006631//fatty acid metabolic process;GO:0006693//prostaglandin metabolic process;GO:0006629//lipid metabolic process;GO:0042127//regulation of cell proliferation;GO:0019371//cyclooxygenase pathway;GO:0006633//fatty acid biosynthetic…	GO:0004601//peroxidase activity;GO:0051213//dioxygenase activity;GO:0016491//oxidoreductase activity;GO:0020037//heme binding;GO:0004666//prostaglandin-endoperoxide synthase activity;GO:0046872//metal ion binding	K00509//Serotonergic synapse;Platelet activation;Regulation of lipolysis in adipocytes;Arachidonic acid metabolism;Metabolic pathways
Ptprg	ENSMUSG00000021745		0.406685	1.06e-06	6.22e-06		0.379066	8.23e-10	2.32e-08		GO:0016020//membrane;GO:0016021//integral component of membrane;GO:0005615//extracellular space;GO:0070062//extracellular exosome	GO:0016311//dephosphorylation;GO:0007420//brain development;GO:0035335//peptidyl-tyrosine dephosphorylation;GO:0010977//negative regulation of neuron projection development;GO:0006470//protein dephosphorylation;GO:0010633//negative regulation of epithelial cell migration	GO:0004721//phosphoprotein phosphatase activity;GO:0016791//phosphatase activity;GO:0042802//identical protein binding;GO:0004725//protein tyrosine phosphatase activity;GO:0016787//hydrolase activity	-
Ptrh1	ENSMUSG00000053746		0.5876	5.6e-11	5.05e-10		0.236643	0.000837155	0.0053344		GO:0005739//mitochondrion	-	GO:0016787//hydrolase activity;GO:0003723//RNA binding;GO:0004045//aminoacyl-tRNA hydrolase activity	-
Pum3	ENSMUSG00000041360		0.439059	4.25e-15	5.24e-14		0.175211	0.000588748	0.00394019		GO:0005694//chromosome;GO:0005730//nucleolus;GO:0005654//nucleoplasm;GO:0005783//endoplasmic reticulum	GO:0010835//regulation of protein ADP-ribosylation	GO:0003723//RNA binding	-
Pus1	ENSMUSG00000029507		0.395399	1.83e-06	1.04e-05		0.421509	2.11e-09	5.55e-08		GO:0005634//nucleus;GO:0000790//nuclear chromatin;GO:0005667//transcription factor complex;GO:0005730//nucleolus;GO:0005739//mitochondrion	GO:0045944//positive regulation of transcription from RNA polymerase II promoter;GO:0031119//tRNA pseudouridine synthesis;GO:0009451//RNA modification;GO:1990481//mRNA pseudouridine synthesis;GO:0008033//tRNA processing;GO:0001522//pseudouridine synthesis	GO:0005515//protein binding;GO:0016853//isomerase activity;GO:0009982//pseudouridine synthase activity;GO:0030374//ligand-dependent nuclear receptor transcription coactivator activity;GO:0003723//RNA binding	-
Pwp2	ENSMUSG00000032834		0.187706	0.00190946	0.00643548		0.440058	3.78e-14	1.96e-12		GO:0034388//Pwp2p-containing subcomplex of 90S preribosome;GO:0005730//nucleolus;GO:0032040//small-subunit processome;GO:0005634//nucleus	GO:0000028//ribosomal small subunit assembly;GO:0000462//maturation of SSU-rRNA from tricistronic rRNA transcript (SSU-rRNA, 5.8S rRNA, LSU-rRNA)	GO:0030515//snoRNA binding	K14558//Ribosome biogenesis in eukaryotes
Pycrl	ENSMUSG00000022571		0.317621	0.00194721	0.00655454		0.185157	0.0064321	0.028541		GO:0005829//cytosol;GO:0005737//cytoplasm	GO:0009972//cytidine deamination;GO:0055114//oxidation-reduction process;GO:0006561//proline biosynthetic process;GO:0055129//L-proline biosynthetic process;GO:0008652//cellular amino acid biosynthetic process	GO:0042802//identical protein binding;GO:0004735//pyrroline-5-carboxylate reductase activity;GO:0016491//oxidoreductase activity;GO:0005515//protein binding;GO:0004126//cytidine deaminase activity	K00286//Biosynthesis of secondary metabolites;Biosynthesis of antibiotics;Biosynthesis of amino acids;Metabolic pathways;Arginine and proline metabolism
Rab20	ENSMUSG00000031504		0.760368	2.53e-12	2.53e-11		0.552883	6.16e-11	2.13e-09		GO:0005769//early endosome;GO:0030670//phagocytic vesicle membrane;GO:0016020//membrane;GO:0005886//plasma membrane;GO:0031410//cytoplasmic vesicle;GO:0005794//Golgi apparatus;GO:0045335//phagocytic vesicle;GO:0043231//intracellular membrane-bounded organelle;GO:0030139//endocytic vesicle	GO:0030100//regulation of endocytosis;GO:0006810//transport;GO:0090383//phagosome acidification;GO:0090385//phagosome-lysosome fusion;GO:0015031//protein transport	GO:0000166//nucleotide binding;GO:0005525//GTP binding;GO:0003924//GTPase activity	-
Rab31	ENSMUSG00000056515		0.351032	5.95e-10	4.91e-09		0.533993	6.86e-29	1.34e-26		GO:0032588//trans-Golgi network membrane;GO:0045335//phagocytic vesicle;GO:0005769//early endosome	GO:0090382//phagosome maturation;GO:0043001//Golgi to plasma membrane protein transport;GO:0032869//cellular response to insulin stimulus;GO:0045055//regulated exocytosis;GO:0031623//receptor internalization	GO:0019003//GDP binding;GO:0005525//GTP binding;GO:0003924//GTPase activity	K07891//Endocytosis
Rai14	ENSMUSG00000022246		0.285648	2.87e-10	2.43e-09		0.368573	1.71e-16	1.15e-14		GO:0005739//mitochondrion;GO:0030054//cell junction;GO:0001650//fibrillar center;GO:0005737//cytoplasm;GO:0005938//cell cortex;GO:0005634//nucleus;GO:0005829//cytosol;GO:0005856//cytoskeleton	GO:0007283//spermatogenesis;GO:0030154//cell differentiation	-	-
Ralb	ENSMUSG00000004451		0.247123	0.000368327	0.00143754		0.266367	2.44e-06	3.31e-05		GO:0030496//midbody;GO:0016020//membrane;GO:0005776//autophagosome;GO:0005886//plasma membrane;GO:0000145//exocyst;GO:0070062//extracellular exosome;GO:0005622//intracellular	GO:0007049//cell cycle;GO:0032092//positive regulation of protein binding;GO:0009267//cellular response to starvation;GO:0071360//cellular response to exogenous dsRNA;GO:0060178//regulation of exocyst localization;GO:0007265//Ras protein signal transduction;GO:0071902//positive regulation of protein serine/threonine kinase activity;GO:0001928//regulation of exocyst assembly;GO:2000786//positive r…	GO:0051117//ATPase binding;GO:0003924//GTPase activity;GO:0005525//GTP binding;GO:0031625//ubiquitin protein ligase binding;GO:0019003//GDP binding;GO:0000166//nucleotide binding	K07835//Ras signaling pathway;Rap1 signaling pathway;Pancreatic cancer;Phospholipase D signaling pathway;Pathways in cancer
Ran	ENSMUSG00000029430		0.273491	3.49e-06	1.89e-05		0.191638	0.000108231	0.000928281		GO:0005635//nuclear envelope;GO:0001673//male germ cell nucleus;GO:0005737//cytoplasm;GO:0000785//chromatin;GO:0005634//nucleus;GO:0030496//midbody;GO:0016020//membrane;GO:0055037//recycling endosome;GO:0043234//protein complex;GO:0031012//extracellular matrix;GO:0070062//extracellular exosome;GO:0005730//nucleolus;GO:0042470//melanosome;GO:0036126//sperm flagellum;GO:0005814//centriole;GO:000564…	GO:0006611//protein export from nucleus;GO:0007049//cell cycle;GO:0014070//response to organic cyclic compound;GO:0000060//protein import into nucleus, translocation;GO:0000056//ribosomal small subunit export from nucleus;GO:0006913//nucleocytoplasmic transport;GO:0071389//cellular response to mineralocorticoid stimulus;GO:0030036//actin cytoskeleton organization;GO:0000055//ribosomal large subun…	GO:0070883//pre-miRNA binding;GO:0005515//protein binding;GO:0045296//cadherin binding;GO:0005525//GTP binding;GO:0045505//dynein intermediate chain binding;GO:0003924//GTPase activity;GO:0005487//nucleocytoplasmic transporter activity;GO:0003723//RNA binding;GO:0000166//nucleotide binding;GO:0061676//importin-alpha family protein binding;GO:0019003//GDP binding;GO:0032403//protein complex bindin…	K07936//Epstein-Barr virus infection;Ribosome biogenesis in eukaryotes;HTLV-I infection;RNA transport
Rarb	ENSMUSG00000017491		2.35103	1.84e-212	5.53e-210		0.642955	7.63e-27	1.29e-24		GO:0005634//nucleus;GO:0005654//nucleoplasm	GO:0043401//steroid hormone mediated signaling pathway;GO:0045944//positive regulation of transcription from RNA polymerase II promoter;GO:0008285//negative regulation of cell proliferation;GO:0032331//negative regulation of chondrocyte differentiation;GO:0035264//multicellular organism growth;GO:0003148//outflow tract septum morphogenesis;GO:0006355//regulation of transcription, DNA-templated;GO…	GO:0003677//DNA binding;GO:0008270//zinc ion binding;GO:0003700//transcription factor activity, sequence-specific DNA binding;GO:0043565//sequence-specific DNA binding;GO:0046965//retinoid X receptor binding;GO:0003708//retinoic acid receptor activity;GO:0003707//steroid hormone receptor activity;GO:0008144//drug binding;GO:0000977//RNA polymerase II regulatory region sequence-specific DNA bindin…	K08528//Small cell lung cancer;Non-small cell lung cancer;Pathways in cancer
Rarres2	ENSMUSG00000009281		2.2372	4.2e-28	9.51e-27		0.464463	0.00153893	0.00881967		GO:0031012//extracellular matrix;GO:0005615//extracellular space;GO:0005576//extracellular region;GO:0070062//extracellular exosome	GO:0006935//chemotaxis;GO:0050921//positive regulation of chemotaxis;GO:0019732//antifungal humoral response;GO:0045600//positive regulation of fat cell differentiation;GO:0001523//retinoid metabolic process;GO:0050873//brown fat cell differentiation;GO:0050830//defense response to Gram-positive bacterium;GO:0050994//regulation of lipid catabolic process;GO:0001934//positive regulation of protein…	GO:0005102//receptor binding;GO:0005515//protein binding	-
Rbm19	ENSMUSG00000029594		0.250359	0.00181083	0.00613648		0.256422	0.000226767	0.00174575		GO:0005730//nucleolus;GO:0005654//nucleoplasm;GO:0005694//chromosome;GO:0005737//cytoplasm;GO:0016020//membrane;GO:0005634//nucleus	GO:0007275//multicellular organism development;GO:0040019//positive regulation of embryonic development	GO:0003676//nucleic acid binding;GO:0003723//RNA binding	-
Rbpms	ENSMUSG00000031586		1.31064	2.51e-42	8.73e-41		0.193852	0.00689525	0.0301755		GO:0016021//integral component of membrane;GO:0005737//cytoplasm;GO:0005654//nucleoplasm;GO:0005685//U1 snRNP;GO:0005829//cytosol;GO:0005634//nucleus;GO:0016020//membrane;GO:0010494//cytoplasmic stress granule;GO:0000932//P-body	GO:0060391//positive regulation of SMAD protein import into nucleus;GO:0010862//positive regulation of pathway-restricted SMAD protein phosphorylation;GO:0000398//mRNA splicing, via spliceosome;GO:0006979//response to oxidative stress;GO:0006351//transcription, DNA-templated;GO:0006355//regulation of transcription, DNA-templated	GO:0030619//U1 snRNA binding;GO:0003723//RNA binding;GO:0035614//snRNA stem-loop binding;GO:0042803//protein homodimerization activity;GO:0008143//poly(A) binding;GO:0003676//nucleic acid binding;GO:0003713//transcription coactivator activity	-
Rcl1	ENSMUSG00000024785		0.312857	1.21e-05	6.08e-05		0.321629	5.8e-07	9.31e-06		GO:0005634//nucleus;GO:0005730//nucleolus	GO:0006396//RNA processing;GO:0006364//rRNA processing;GO:0000480//endonucleolytic cleavage in 5'-ETS of tricistronic rRNA transcript (SSU-rRNA, 5.8S rRNA, LSU-rRNA);GO:0042254//ribosome biogenesis;GO:0000447//endonucleolytic cleavage in ITS1 to separate SSU-rRNA from 5.8S rRNA and LSU-rRNA from tricistronic rRNA transcript (SSU-rRNA, 5.8S rRNA, LSU-rRNA)	GO:0004521//endoribonuclease activity;GO:0003824//catalytic activity	K11108//Ribosome biogenesis in eukaryotes
Rnase4	ENSMUSG00000021876		1.253	6.4e-38	2e-36		0.227044	0.000463094	0.00321454		GO:0070062//extracellular exosome;GO:0005576//extracellular region	GO:0090305//nucleic acid phosphodiester bond hydrolysis	GO:0004518//nuclease activity;GO:0016787//hydrolase activity;GO:0003676//nucleic acid binding;GO:0004519//endonuclease activity	-
Rpf2	ENSMUSG00000038510		0.343423	0.000615127	0.00229927		0.433493	3.52e-09	8.8e-08		GO:0005634//nucleus;GO:0005730//nucleolus	GO:1901796//regulation of signal transduction by p53 class mediator;GO:1902570//protein localization to nucleolus;GO:0000463//maturation of LSU-rRNA from tricistronic rRNA transcript (SSU-rRNA, 5.8S rRNA, LSU-rRNA);GO:0042254//ribosome biogenesis;GO:0042273//ribosomal large subunit biogenesis;GO:0006357//regulation of transcription from RNA polymerase II promoter;GO:0000027//ribosomal large subun…	GO:0000981//RNA polymerase II transcription factor activity, sequence-specific DNA binding;GO:0003723//RNA binding;GO:0019843//rRNA binding;GO:0008097//5S rRNA binding	-
Rps6ka4	ENSMUSG00000024952		0.171222	0.0130749	0.0353931		0.245028	0.000138605	0.00114874		GO:0005829//cytosol;GO:0005634//nucleus;GO:0005737//cytoplasm;GO:0005654//nucleoplasm	GO:0006355//regulation of transcription, DNA-templated;GO:0006954//inflammatory response;GO:0006468//protein phosphorylation;GO:0033129//positive regulation of histone phosphorylation;GO:0045944//positive regulation of transcription from RNA polymerase II promoter;GO:0043988//histone H3-S28 phosphorylation;GO:0070498//interleukin-1-mediated signaling pathway;GO:0035556//intracellular signal trans…	GO:0004674//protein serine/threonine kinase activity;GO:0005524//ATP binding;GO:0005515//protein binding;GO:0016740//transferase activity;GO:0004672//protein kinase activity;GO:0000287//magnesium ion binding;GO:0016301//kinase activity;GO:0000166//nucleotide binding	K16510//MAPK signaling pathway;TNF signaling pathway
Rras2	ENSMUSG00000055723		0.739291	1.24e-21	2.15e-20		0.318674	6.4e-09	1.53e-07		GO:0070062//extracellular exosome;GO:0005622//intracellular;GO:0005925//focal adhesion;GO:0016020//membrane;GO:0005886//plasma membrane	GO:0009987//cellular process;GO:0007165//signal transduction;GO:0001649//osteoblast differentiation;GO:0030335//positive regulation of cell migration;GO:1901214//regulation of neuron death;GO:0007265//Ras protein signal transduction	GO:0003924//GTPase activity;GO:0005525//GTP binding;GO:0005515//protein binding;GO:0000166//nucleotide binding	K07830//Regulation of actin cytoskeleton;MAPK signaling pathway;Proteoglycans in cancer;HTLV-I infection;Phospholipase D signaling pathway;Ras signaling pathway;cAMP signaling pathway;Tight junction
Rrp12	ENSMUSG00000035049		0.465835	5.49e-09	4.09e-08		0.475995	6.85e-13	3.05e-11		GO:0005730//nucleolus;GO:0031965//nuclear membrane;GO:0016021//integral component of membrane;GO:0005634//nucleus;GO:0016020//membrane	-	GO:0003723//RNA binding	-
Rrp9	ENSMUSG00000041506		0.332133	0.000231747	0.000939876		0.49133	2.07e-12	8.59e-11		GO:0005634//nucleus;GO:0032040//small-subunit processome;GO:0031428//box C/D snoRNP complex;GO:0030529//intracellular ribonucleoprotein complex;GO:0005730//nucleolus	GO:0006364//rRNA processing	GO:0003723//RNA binding;GO:0034511//U3 snoRNA binding;GO:0030515//snoRNA binding	-
Rrs1	ENSMUSG00000061024		0.274305	2.58e-05	0.000122759		0.495973	2.93e-18	2.32e-16		GO:0001650//fibrillar center;GO:0005783//endoplasmic reticulum;GO:0005634//nucleus;GO:0000794//condensed nuclear chromosome;GO:0005730//nucleolus;GO:0030687//preribosome, large subunit precursor	GO:0000055//ribosomal large subunit export from nucleus;GO:1901796//regulation of signal transduction by p53 class mediator;GO:0002244//hematopoietic progenitor cell differentiation;GO:1902570//protein localization to nucleolus;GO:0000027//ribosomal large subunit assembly;GO:0042254//ribosome biogenesis;GO:0000447//endonucleolytic cleavage in ITS1 to separate SSU-rRNA from 5.8S rRNA and LSU-rRNA …	GO:0008097//5S rRNA binding;GO:0005515//protein binding;GO:0003723//RNA binding	-
S100a10	ENSMUSG00000041959		0.86857	6.59e-15	8.03e-14		0.231049	0.00193538	0.010623		GO:0070062//extracellular exosome;GO:0005576//extracellular region;GO:0019897//extrinsic component of plasma membrane;GO:0016020//membrane;GO:0005783//endoplasmic reticulum;GO:0045121//membrane raft;GO:0016021//integral component of membrane	GO:0001765//membrane raft assembly;GO:0043547//positive regulation of GTPase activity;GO:0072659//protein localization to plasma membrane;GO:0006900//vesicle budding from membrane;GO:0051290//protein heterotetramerization;GO:0042493//response to drug;GO:0051496//positive regulation of stress fiber assembly;GO:1900026//positive regulation of substrate adhesion-dependent cell spreading;GO:0051099//…	GO:0005515//protein binding;GO:0044325//ion channel binding;GO:0005509//calcium ion binding;GO:0042803//protein homodimerization activity	-
S1pr2	ENSMUSG00000043895		0.455018	2.46e-17	3.47e-16		0.339768	1.53e-09	4.09e-08		GO:0016021//integral component of membrane;GO:0005886//plasma membrane;GO:0016020//membrane	GO:0007165//signal transduction;GO:0007186//G-protein coupled receptor signaling pathway;GO:0031532//actin cytoskeleton reorganization;GO:0090394//negative regulation of excitatory postsynaptic potential;GO:1903142//positive regulation of establishment of endothelial barrier;GO:0010800//positive regulation of peptidyl-threonine phosphorylation;GO:0003376//sphingosine-1-phosphate signaling pathway…	GO:0038036//sphingosine-1-phosphate receptor activity;GO:0004930//G-protein coupled receptor activity;GO:0001664//G-protein coupled receptor binding;GO:0005515//protein binding;GO:0004871//signal transducer activity;GO:0005178//integrin binding	K04292//Sphingolipid signaling pathway;Neuroactive ligand-receptor interaction
Sat1	ENSMUSG00000025283		1.20398	6.17e-56	3.04e-54		0.398084	6.77e-12	2.63e-10		GO:0005737//cytoplasm;GO:0005829//cytosol;GO:0005622//intracellular	GO:0006598//polyamine catabolic process;GO:0001525//angiogenesis;GO:0032918//spermidine acetylation;GO:0009447//putrescine catabolic process;GO:0006595//polyamine metabolic process;GO:0042127//regulation of cell proliferation;GO:0046208//spermine catabolic process	GO:0008080//N-acetyltransferase activity;GO:0019809//spermidine binding;GO:0016740//transferase activity;GO:0042802//identical protein binding;GO:0016746//transferase activity, transferring acyl groups;GO:0004145//diamine N-acetyltransferase activity	K00657//Metabolic pathways;Arginine and proline metabolism
Sdc4	ENSMUSG00000017009		0.977884	4.22e-56	2.09e-54		0.601372	3.02e-32	7.01e-30		GO:0070062//extracellular exosome;GO:0005925//focal adhesion;GO:0045121//membrane raft;GO:0009986//cell surface;GO:0016021//integral component of membrane;GO:0016020//membrane;GO:0005576//extracellular region;GO:0043034//costamere;GO:0005796//Golgi lumen	GO:0001657//ureteric bud development;GO:0001843//neural tube closure;GO:0051894//positive regulation of focal adhesion assembly;GO:0010762//regulation of fibroblast migration;GO:0007165//signal transduction;GO:0060122//inner ear receptor stereocilium organization;GO:0045860//positive regulation of protein kinase activity;GO:0051496//positive regulation of stress fiber assembly;GO:0042060//wound h…	GO:0042802//identical protein binding;GO:0001968//fibronectin binding;GO:0070053//thrombospondin receptor activity;GO:0005515//protein binding;GO:0005080//protein kinase C binding	K05719//Cell adhesion molecules (CAMs);Arrhythmogenic right ventricular cardiomyopathy (ARVC);Bacterial invasion of epithelial cells;Proteoglycans in cancer;Leishmaniasis;Hypertrophic cardiomyopathy (HCM);Leukocyte transendothelial migration;Platelet activation;PI3K-Akt signaling pathway;Pertussis;ECM-receptor interaction;Phagosome;Toxoplasmosis;Focal adhesion;Dilated cardiomyopathy;Pathogenic Es…
Selenop	ENSMUSG00000064373		2.26339	2.77e-192	6.67e-190		0.309875	5.4e-08	1.07e-06		GO:0070062//extracellular exosome;GO:0005615//extracellular space;GO:0005576//extracellular region	GO:0007626//locomotory behavior;GO:0001887//selenium compound metabolic process;GO:0009791//post-embryonic development;GO:0007420//brain development;GO:0019953//sexual reproduction;GO:0040007//growth	GO:0005515//protein binding;GO:0008430//selenium binding	-
Sema4b	ENSMUSG00000030539		0.325284	0.000170355	0.000706638		0.195196	0.00625077	0.0278737		GO:0045202//synapse;GO:0016021//integral component of membrane;GO:0005615//extracellular space;GO:0005886//plasma membrane;GO:0016020//membrane	GO:0050919//negative chemotaxis;GO:0007275//multicellular organism development;GO:0030154//cell differentiation;GO:0007399//nervous system development	GO:0005515//protein binding	K06521//Axon guidance
Sephs2	ENSMUSG00000049091		0.210535	0.00283121	0.00914372		0.260891	1.2e-06	1.76e-05		-	GO:0001887//selenium compound metabolic process;GO:0016310//phosphorylation;GO:0016260//selenocysteine biosynthetic process	GO:0005524//ATP binding;GO:0000166//nucleotide binding;GO:0016740//transferase activity;GO:0004756//selenide, water dikinase activity;GO:0016301//kinase activity	K01008//Selenocompound metabolism;Metabolic pathways
Serpine2	ENSMUSG00000026249		1.19838	5.3e-111	6.04e-109		0.156674	0.00117686	0.00707945		GO:0031232//extrinsic component of external side of plasma membrane;GO:1903561//extracellular vesicle;GO:0031012//extracellular matrix;GO:0005615//extracellular space;GO:0031091//platelet alpha granule;GO:0005576//extracellular region;GO:0005829//cytosol;GO:0031594//neuromuscular junction	GO:0007399//nervous system development;GO:0010951//negative regulation of endopeptidase activity;GO:0010466//negative regulation of peptidase activity;GO:0008285//negative regulation of cell proliferation;GO:0007596//blood coagulation;GO:0042177//negative regulation of protein catabolic process;GO:0051966//regulation of synaptic transmission, glutamatergic;GO:0030308//negative regulation of cell …	GO:0005539//glycosaminoglycan binding;GO:0005102//receptor binding;GO:0030414//peptidase inhibitor activity;GO:0004867//serine-type endopeptidase inhibitor activity;GO:0008201//heparin binding	-
Sestd1	ENSMUSG00000042272		0.209972	0.00922438	0.0261394		0.360226	1.71e-10	5.45e-09		GO:0034704//calcium channel complex	GO:1904878//negative regulation of calcium ion transmembrane transport via high voltage-gated calcium channel	GO:0005546//phosphatidylinositol-4,5-bisphosphate binding;GO:0070273//phosphatidylinositol-4-phosphate binding;GO:0080025//phosphatidylinositol-3,5-bisphosphate binding;GO:0010314//phosphatidylinositol-5-phosphate binding;GO:0032266//phosphatidylinositol-3-phosphate binding;GO:0043325//phosphatidylinositol-3,4-bisphosphate binding;GO:0070300//phosphatidic acid binding	-
Sh3rf1	ENSMUSG00000031642		1.25408	1.33e-80	1.04e-78		0.156107	0.00476902	0.0223529		GO:0005829//cytosol	GO:0006915//apoptotic process;GO:0043066//negative regulation of apoptotic process;GO:0046328//regulation of JNK cascade;GO:0043154//negative regulation of cysteine-type endopeptidase activity involved in apoptotic process;GO:2001237//negative regulation of extrinsic apoptotic signaling pathway	GO:0046872//metal ion binding	-
Shc1	ENSMUSG00000042626		0.383603	2.56e-12	2.56e-11		0.179325	4.77e-05	0.000461724		GO:0005622//intracellular;GO:0005739//mitochondrion;GO:0005737//cytoplasm;GO:0005829//cytosol;GO:0005759//mitochondrial matrix;GO:0005886//plasma membrane	GO:0007165//signal transduction;GO:0000165//MAPK cascade;GO:0070374//positive regulation of ERK1 and ERK2 cascade;GO:0008286//insulin receptor signaling pathway;GO:0031532//actin cytoskeleton reorganization;GO:0042742//defense response to bacterium;GO:0043066//negative regulation of apoptotic process;GO:0000187//activation of MAPK activity;GO:0040008//regulation of growth;GO:0007173//epidermal gr…	GO:0030971//receptor tyrosine kinase binding;GO:0005515//protein binding;GO:0005159//insulin-like growth factor receptor binding;GO:0048408//epidermal growth factor binding;GO:0005158//insulin receptor binding;GO:0005168//neurotrophin TRKA receptor binding;GO:0046875//ephrin receptor binding;GO:0001784//phosphotyrosine residue binding	K06279//MicroRNAs in cancer;Insulin signaling pathway;Estrogen signaling pathway;Chronic myeloid leukemia;Glioma;Natural killer cell mediated cytotoxicity;Chemokine signaling pathway;Bacterial invasion of epithelial cells;Prolactin signaling pathway;Alcoholism;Ras signaling pathway;Focal adhesion;Phospholipase D signaling pathway;Neurotrophin signaling pathway;ErbB signaling pathway
Shq1	ENSMUSG00000035378		0.424939	4.3e-05	0.000197219		0.340718	0.000228978	0.0017611		GO:0005654//nucleoplasm;GO:0005829//cytosol;GO:0005634//nucleus;GO:0005737//cytoplasm	GO:1904874//positive regulation of telomerase RNA localization to Cajal body;GO:0022618//ribonucleoprotein complex assembly;GO:2000233//negative regulation of rRNA processing;GO:0000493//box H/ACA snoRNP assembly;GO:0043065//positive regulation of apoptotic process	GO:0051082//unfolded protein binding	-
Sipa1	ENSMUSG00000056917		0.276524	0.00129537	0.00452492		0.279359	9.89e-05	0.000863022		GO:0030133//transport vesicle;GO:0043234//protein complex	GO:0043547//positive regulation of GTPase activity;GO:0051056//regulation of small GTPase mediated signal transduction;GO:0042631//cellular response to water deprivation	GO:0005096//GTPase activator activity;GO:0008022//protein C-terminus binding	K08013//Leukocyte transendothelial migration;Rap1 signaling pathway
Sipa1l2	ENSMUSG00000001995		0.872651	1.98e-29	4.72e-28		0.853892	2.73e-51	1.77e-48		-	GO:0043547//positive regulation of GTPase activity;GO:0051056//regulation of small GTPase mediated signal transduction	GO:0005096//GTPase activator activity	K17702//Rap1 signaling pathway
Slc20a1	ENSMUSG00000027397		0.677997	2.19e-08	1.53e-07		0.35251	8.88e-06	0.000104722		GO:0005887//integral component of plasma membrane;GO:0016020//membrane;GO:0005886//plasma membrane;GO:0016021//integral component of membrane	GO:0055085//transmembrane transport;GO:0035435//phosphate ion transmembrane transport;GO:0007165//signal transduction;GO:0006814//sodium ion transport;GO:0006817//phosphate ion transport;GO:0006810//transport;GO:0035725//sodium ion transmembrane transport;GO:0043123//positive regulation of I-kappaB kinase/NF-kappaB signaling	GO:0004871//signal transducer activity;GO:0005315//inorganic phosphate transmembrane transporter activity;GO:0005316//high-affinity inorganic phosphate:sodium symporter activity;GO:0015319//sodium:inorganic phosphate symporter activity;GO:0015293//symporter activity	-
Slc22a15	ENSMUSG00000033147		1.20491	4.52e-09	3.41e-08		0.880948	3.07e-10	9.35e-09		GO:0016021//integral component of membrane;GO:0016020//membrane	GO:0006810//transport;GO:0015711//organic anion transport;GO:0055085//transmembrane transport;GO:0006811//ion transport	GO:0022857//transmembrane transporter activity;GO:0008514//organic anion transmembrane transporter activity	-
Slc25a30	ENSMUSG00000022003		0.533216	2.2e-23	4.15e-22		0.184921	0.000181575	0.00144442		GO:0005739//mitochondrion;GO:0016021//integral component of membrane;GO:0016020//membrane;GO:0005743//mitochondrial inner membrane	GO:0055085//transmembrane transport;GO:0006839//mitochondrial transport;GO:0006810//transport	GO:0022857//transmembrane transporter activity	-
Slc25a5	ENSMUSG00000016319		0.676477	1.9e-35	5.55e-34		0.159219	0.000702175	0.00457301		GO:0005634//nucleus;GO:0016020//membrane;GO:0043209//myelin sheath;GO:0070062//extracellular exosome;GO:0005739//mitochondrion;GO:0071817//MMXD complex;GO:0016021//integral component of membrane;GO:0031012//extracellular matrix;GO:0045121//membrane raft;GO:0042645//mitochondrial nucleoid;GO:0005743//mitochondrial inner membrane	GO:1901029//negative regulation of mitochondrial outer membrane permeabilization involved in apoptotic signaling pathway;GO:0046902//regulation of mitochondrial membrane permeability;GO:0007059//chromosome segregation;GO:0006810//transport;GO:0015866//ADP transport;GO:0008284//positive regulation of cell proliferation;GO:0055085//transmembrane transport;GO:0015867//ATP transport;GO:1990830//cellu…	GO:0022857//transmembrane transporter activity;GO:0031625//ubiquitin protein ligase binding;GO:0005471//ATP:ADP antiporter activity;GO:0003723//RNA binding	K05863//HTLV-I infection;Calcium signaling pathway;Parkinson's disease;cGMP-PKG signaling pathway;Huntington's disease
Slc29a1	ENSMUSG00000023942		0.339833	3.26e-06	1.78e-05		0.377372	5.08e-09	1.24e-07		GO:0016323//basolateral plasma membrane;GO:0005887//integral component of plasma membrane;GO:0016324//apical plasma membrane;GO:0016021//integral component of membrane;GO:0005886//plasma membrane;GO:0098794//postsynapse;GO:0016020//membrane	GO:1901642//nucleoside transmembrane transport;GO:0030431//sleep;GO:0006810//transport;GO:0060079//excitatory postsynaptic potential;GO:0015858//nucleoside transport;GO:0007595//lactation;GO:0015862//uridine transport;GO:0071333//cellular response to glucose stimulus;GO:0071456//cellular response to hypoxia	GO:0005337//nucleoside transmembrane transporter activity	-
Slc43a2	ENSMUSG00000038178		0.485178	5.9e-07	3.54e-06		0.34593	3.98e-05	0.000393736		GO:0005887//integral component of plasma membrane;GO:0005886//plasma membrane;GO:0016020//membrane;GO:0016021//integral component of membrane	GO:0015807//L-amino acid transport;GO:0055085//transmembrane transport;GO:0015804//neutral amino acid transport;GO:1902475//L-alpha-amino acid transmembrane transport	GO:0015175//neutral amino acid transmembrane transporter activity;GO:0015179//L-amino acid transmembrane transporter activity	-
Slc6a6	ENSMUSG00000030096		0.199223	0.000579306	0.00217627		0.307812	8.82e-10	2.47e-08		GO:0005886//plasma membrane;GO:0016020//membrane;GO:0016021//integral component of membrane;GO:0005887//integral component of plasma membrane	GO:0006810//transport;GO:0015734//taurine transport;GO:1903825//organic acid transmembrane transport;GO:0098656//anion transmembrane transport;GO:0006836//neurotransmitter transport;GO:0055085//transmembrane transport	GO:0005368//taurine transmembrane transporter activity;GO:0015293//symporter activity;GO:0005369//taurine:sodium symporter activity;GO:0005328//neurotransmitter:sodium symporter activity	-
Slfn10-ps	ENSMUSG00000072621		0.899351	4.85e-07	2.95e-06		0.379394	0.00798756	0.0339048		-	-	-	-
Slfn2	ENSMUSG00000072620		0.570574	3.04e-05	0.000142782		1.09993	2.87e-11	1.03e-09		-	GO:0008285//negative regulation of cell proliferation	GO:0005524//ATP binding	-
Smap2	ENSMUSG00000032870		0.500351	2.46e-07	1.55e-06		0.311098	0.0010576	0.00649761		GO:0005737//cytoplasm	GO:0043547//positive regulation of GTPase activity	GO:0005515//protein binding;GO:0005096//GTPase activator activity;GO:0046872//metal ion binding	K12486//Endocytosis
Smurf1	ENSMUSG00000038780		0.20362	0.00305302	0.0097871		0.305972	2.19e-07	3.84e-06		GO:0016020//membrane;GO:0005886//plasma membrane;GO:0005829//cytosol;GO:0005739//mitochondrion;GO:0070062//extracellular exosome;GO:0043025//neuronal cell body;GO:0030424//axon;GO:0005737//cytoplasm	GO:0071211//protein targeting to vacuole involved in autophagy;GO:0016567//protein ubiquitination;GO:0030512//negative regulation of transforming growth factor beta receptor signaling pathway;GO:0030579//ubiquitin-dependent SMAD protein catabolic process;GO:0061736//engulfment of target by autophagosome;GO:0030514//negative regulation of BMP signaling pathway;GO:0042787//protein ubiquitination in…	GO:0070411//I-SMAD binding;GO:0016740//transferase activity;GO:0061630//ubiquitin protein ligase activity;GO:0004842//ubiquitin-protein transferase activity;GO:0070412//R-SMAD binding;GO:0005515//protein binding	K04678//Ubiquitin mediated proteolysis;Endocytosis;TGF-beta signaling pathway
Snai2	ENSMUSG00000022676		0.404622	2.74e-05	0.00012946		0.337839	4.98e-05	0.000478852		GO:0000790//nuclear chromatin;GO:0005634//nucleus;GO:0005737//cytoplasm	GO:0032642//regulation of chemokine production;GO:0007219//Notch signaling pathway;GO:0000122//negative regulation of transcription from RNA polymerase II promoter;GO:0060021//palate development;GO:1902230//negative regulation of intrinsic apoptotic signaling pathway in response to DNA damage;GO:0035066//positive regulation of histone acetylation;GO:0043518//negative regulation of DNA damage resp…	GO:0046872//metal ion binding;GO:0001078//transcriptional repressor activity, RNA polymerase II core promoter proximal region sequence-specific binding;GO:0003682//chromatin binding;GO:0003676//nucleic acid binding;GO:0043565//sequence-specific DNA binding;GO:0003677//DNA binding;GO:0005515//protein binding;GO:0003705//transcription factor activity, RNA polymerase II distal enhancer sequence-spec…	K05706//Hippo signaling pathway;Adherens junction
Snhg15	ENSMUSG00000085156		0.73354	9.71e-10	7.84e-09		0.494689	4.04e-07	6.68e-06		-	-	-	-
Snhg17	ENSMUSG00000085385		0.346152	0.000673844	0.00249763		0.274239	0.000431815	0.00302507		-	-	-	-
Snhg5	ENSMUSG00000097195		0.388725	0.000351648	0.00137691		0.290075	0.000631144	0.00417573		-	-	-	-
Snora57	ENSMUSG00000070167		0.985705	2.48e-07	1.57e-06		0.777753	1.61e-08	3.57e-07		-	-	-	-
Sorcs1	ENSMUSG00000043531		1.28679	1.67e-55	8.19e-54		0.498222	4.15e-15	2.4e-13		GO:0016021//integral component of membrane;GO:0016020//membrane	-	-	-
Sox13	ENSMUSG00000070643		0.652274	0.0168762	0.0442937		0.585644	0.0108278	0.0433968		GO:0005634//nucleus	GO:0045586//regulation of gamma-delta T cell differentiation;GO:0006351//transcription, DNA-templated;GO:0006355//regulation of transcription, DNA-templated	GO:0003677//DNA binding;GO:0000977//RNA polymerase II regulatory region sequence-specific DNA binding;GO:0043565//sequence-specific DNA binding	-
Sox4	ENSMUSG00000076431		0.23265	0.00169444	0.00578096		0.191843	0.00128229	0.00762053		GO:0005634//nucleus;GO:0005737//cytoplasm;GO:0005654//nucleoplasm;GO:0044798//nuclear transcription factor complex;GO:0005739//mitochondrion	GO:0031397//negative regulation of protein ubiquitination;GO:0031018//endocrine pancreas development;GO:0003183//mitral valve morphogenesis;GO:0060563//neuroepithelial cell differentiation;GO:0030177//positive regulation of Wnt signaling pathway;GO:0002328//pro-B cell differentiation;GO:0045727//positive regulation of translation;GO:0021782//glial cell development;GO:0001501//skeletal system deve…	GO:0000981//RNA polymerase II transcription factor activity, sequence-specific DNA binding;GO:0046982//protein heterodimerization activity;GO:0000976//transcription regulatory region sequence-specific DNA binding;GO:0003700//transcription factor activity, sequence-specific DNA binding;GO:0001046//core promoter sequence-specific DNA binding;GO:0001105//RNA polymerase II transcription coactivator a…	-
Sparcl1	ENSMUSG00000029309		1.21956	0.00023955	0.00096989		0.806742	0.000566996	0.00382616		GO:0070062//extracellular exosome;GO:0005578//proteinaceous extracellular matrix;GO:0005615//extracellular space;GO:0005576//extracellular region	GO:0007165//signal transduction;GO:0048856//anatomical structure development	GO:0046872//metal ion binding;GO:0005509//calcium ion binding;GO:0005518//collagen binding;GO:0050840//extracellular matrix binding	-
Spon1	ENSMUSG00000038156		4.36645	3.17e-29	7.48e-28		0.821135	8.26e-08	1.57e-06		GO:0005576//extracellular region;GO:0005615//extracellular space;GO:0031012//extracellular matrix;GO:0005578//proteinaceous extracellular matrix	GO:0007155//cell adhesion	GO:0046872//metal ion binding	-
Spp1	ENSMUSG00000029304		2.3201	1.44e-21	2.49e-20		1.11925	6.44e-08	1.26e-06		GO:0005576//extracellular region;GO:0005615//extracellular space;GO:0005737//cytoplasm;GO:0005794//Golgi apparatus;GO:0070062//extracellular exosome;GO:0045177//apical part of cell	GO:0031214//biomineral tissue development;GO:0007155//cell adhesion;GO:0045893//positive regulation of transcription, DNA-templated;GO:1990830//cellular response to leukemia inhibitory factor;GO:0010469//regulation of receptor activity;GO:0010811//positive regulation of cell-substrate adhesion;GO:0043066//negative regulation of apoptotic process;GO:0033280//response to vitamin D;GO:0001503//ossif…	GO:0050840//extracellular matrix binding;GO:0005125//cytokine activity	K05719//Rap1 signaling pathway;Pathways in cancer;Shigellosis;Small cell lung cancer;Axon guidance;Toxoplasmosis;Focal adhesion;Dilated cardiomyopathy;Pathogenic Escherichia coli infection;Regulation of actin cytoskeleton;Leukocyte transendothelial migration;Hypertrophic cardiomyopathy (HCM);Platelet activation;Pertussis;ECM-receptor interaction;PI3K-Akt signaling pathway;Phagosome;Cell adhesion …
Spry4	ENSMUSG00000024427		1.25729	8.74e-24	1.69e-22		1.85671	1.02e-95	2.06e-92		GO:0005925//focal adhesion;GO:0016020//membrane;GO:0005737//cytoplasm	GO:0007275//multicellular organism development;GO:0009966//regulation of signal transduction;GO:1990830//cellular response to leukemia inhibitory factor;GO:0070373//negative regulation of ERK1 and ERK2 cascade;GO:0043407//negative regulation of MAP kinase activity	GO:0005515//protein binding	-
Sqor	ENSMUSG00000005803		0.39604	9.85e-05	0.000424524		0.171027	0.012059	0.0472511		GO:0005739//mitochondrion;GO:0005743//mitochondrial inner membrane	GO:0055114//oxidation-reduction process;GO:0070813//hydrogen sulfide metabolic process;GO:0070221//sulfide oxidation, using sulfide:quinone oxidoreductase	GO:0070224//sulfide:quinone oxidoreductase activity;GO:0048038//quinone binding;GO:0016491//oxidoreductase activity	K17218//Sulfur metabolism
Srm	ENSMUSG00000006442		0.265588	0.000431212	0.00166142		0.489334	1.19e-13	5.78e-12		-	GO:0006596//polyamine biosynthetic process;GO:0008295//spermidine biosynthetic process;GO:0006595//polyamine metabolic process;GO:1990830//cellular response to leukemia inhibitory factor	GO:0003824//catalytic activity;GO:0004766//spermidine synthase activity;GO:0042802//identical protein binding;GO:0016740//transferase activity;GO:0042803//protein homodimerization activity	K00797//Glutathione metabolism;beta-Alanine metabolism;Cysteine and methionine metabolism;Metabolic pathways;Arginine and proline metabolism
Ssh2	ENSMUSG00000037926		1.81799	1.15e-45	4.41e-44		0.214491	0.00265604	0.0138705		GO:0005925//focal adhesion;GO:0030054//cell junction;GO:0005615//extracellular space;GO:0005856//cytoskeleton;GO:0005737//cytoplasm	GO:0035335//peptidyl-tyrosine dephosphorylation;GO:0008064//regulation of actin polymerization or depolymerization;GO:0010591//regulation of lamellipodium assembly;GO:0030335//positive regulation of cell migration;GO:0006470//protein dephosphorylation;GO:0050770//regulation of axonogenesis;GO:0030036//actin cytoskeleton organization;GO:0016311//dephosphorylation	GO:0004725//protein tyrosine phosphatase activity;GO:0008138//protein tyrosine/serine/threonine phosphatase activity;GO:0003779//actin binding;GO:0016787//hydrolase activity;GO:0004721//phosphoprotein phosphatase activity;GO:0016791//phosphatase activity	K05766//Regulation of actin cytoskeleton
Stau1	ENSMUSG00000039536		0.194844	0.00299891	0.00963502		0.238002	0.000376548	0.00268378		GO:0030529//intracellular ribonucleoprotein complex;GO:0043025//neuronal cell body;GO:0070062//extracellular exosome;GO:0005791//rough endoplasmic reticulum;GO:0005737//cytoplasm;GO:0036464//cytoplasmic ribonucleoprotein granule;GO:0030425//dendrite;GO:0005783//endoplasmic reticulum;GO:0044297//cell body;GO:0016020//membrane;GO:0043005//neuron projection;GO:0010494//cytoplasmic stress granule;GO:…	GO:0045070//positive regulation of viral genome replication;GO:0046726//positive regulation by virus of viral protein levels in host cell;GO:0034599//cellular response to oxidative stress;GO:1900273//positive regulation of long-term synaptic potentiation;GO:0008298//intracellular mRNA localization	GO:0005515//protein binding;GO:0003725//double-stranded RNA binding;GO:0008157//protein phosphatase 1 binding;GO:0003723//RNA binding	-
Steap1	ENSMUSG00000015652		0.473875	9.18e-15	1.11e-13		0.161539	0.00200653	0.0109469		GO:0016020//membrane;GO:0010008//endosome membrane;GO:0005768//endosome;GO:0005886//plasma membrane;GO:0016021//integral component of membrane;GO:0005887//integral component of plasma membrane	GO:0006811//ion transport;GO:0055114//oxidation-reduction process;GO:0055072//iron ion homeostasis	GO:0016491//oxidoreductase activity;GO:0046872//metal ion binding	K14737//Mineral absorption
Stom	ENSMUSG00000026880		0.210755	0.000183527	0.000755919		0.335847	2.63e-12	1.08e-10		GO:0005829//cytosol;GO:0005886//plasma membrane;GO:0042470//melanosome;GO:0005739//mitochondrion;GO:0070062//extracellular exosome;GO:0045121//membrane raft;GO:0005783//endoplasmic reticulum;GO:0005856//cytoskeleton;GO:0016020//membrane;GO:0031982//vesicle;GO:0072562//blood microparticle;GO:0031410//cytoplasmic vesicle;GO:0005887//integral component of plasma membrane;GO:0005737//cytoplasm;GO:004…	GO:0044829//positive regulation by host of viral genome replication;GO:1901585//regulation of acid-sensing ion channel activity;GO:0034765//regulation of ion transmembrane transport;GO:0090314//positive regulation of protein targeting to membrane;GO:0051260//protein homooligomerization;GO:0048524//positive regulation of viral process	GO:0005515//protein binding;GO:0042802//identical protein binding;GO:0070063//RNA polymerase binding;GO:0042803//protein homodimerization activity	-
Suv39h2	ENSMUSG00000026646		0.361991	0.00779037	0.0225507		0.449783	1.17e-05	0.000134419		GO:0005634//nucleus;GO:0005694//chromosome;GO:0000785//chromatin	GO:0034968//histone lysine methylation;GO:0006333//chromatin assembly or disassembly;GO:0071456//cellular response to hypoxia;GO:0000122//negative regulation of transcription from RNA polymerase II promoter;GO:0032259//methylation;GO:0051567//histone H3-K9 methylation;GO:0006338//chromatin remodeling	GO:0008270//zinc ion binding;GO:0018024//histone-lysine N-methyltransferase activity;GO:0016740//transferase activity;GO:0046974//histone methyltransferase activity (H3-K9 specific);GO:0046872//metal ion binding;GO:0008168//methyltransferase activity;GO:1904047//S-adenosyl-L-methionine binding	K11419//Lysine degradation
Synj2	ENSMUSG00000023805		0.145397	0.0141384	0.0379071		0.512124	8.01e-24	1.02e-21		GO:0042995//cell projection;GO:0005886//plasma membrane;GO:0016020//membrane;GO:0045121//membrane raft;GO:0005737//cytoplasm;GO:0005856//cytoskeleton;GO:0030424//axon	GO:0046856//phosphatidylinositol dephosphorylation	GO:0042578//phosphoric ester hydrolase activity;GO:0003723//RNA binding;GO:0004439//phosphatidylinositol-4,5-bisphosphate 5-phosphatase activity;GO:0016787//hydrolase activity;GO:0034595//phosphatidylinositol phosphate 5-phosphatase activity;GO:0003676//nucleic acid binding	K01099//Phosphatidylinositol signaling system;Metabolic pathways;Inositol phosphate metabolism
Syt12	ENSMUSG00000049303		1.67294	3.45e-18	5.1e-17		0.43128	0.000463929	0.00321758		GO:0031410//cytoplasmic vesicle;GO:0005623//cell;GO:0016021//integral component of membrane;GO:0030672//synaptic vesicle membrane;GO:0030054//cell junction;GO:0098793//presynapse;GO:0045202//synapse;GO:0005886//plasma membrane;GO:0016020//membrane	GO:0048792//spontaneous exocytosis of neurotransmitter;GO:0048791//calcium ion-regulated exocytosis of neurotransmitter;GO:0017158//regulation of calcium ion-dependent exocytosis;GO:0046928//regulation of neurotransmitter secretion;GO:0060291//long-term synaptic potentiation;GO:0006906//vesicle fusion	GO:0005509//calcium ion binding;GO:0005544//calcium-dependent phospholipid binding;GO:0019905//syntaxin binding;GO:0030276//clathrin binding	-
Sytl5	ENSMUSG00000054453		0.621181	1.16e-20	1.92e-19		0.275635	1.3e-05	0.000147064		GO:0005622//intracellular;GO:0045202//synapse;GO:0070382//exocytic vesicle;GO:0098793//presynapse;GO:0016020//membrane;GO:0005886//plasma membrane	GO:0006906//vesicle fusion;GO:0006886//intracellular protein transport;GO:0048791//calcium ion-regulated exocytosis of neurotransmitter;GO:0017158//regulation of calcium ion-dependent exocytosis;GO:0006887//exocytosis	GO:0005543//phospholipid binding;GO:0005515//protein binding;GO:0017137//Rab GTPase binding;GO:0005509//calcium ion binding;GO:0005544//calcium-dependent phospholipid binding;GO:0030276//clathrin binding;GO:0046872//metal ion binding;GO:0019905//syntaxin binding	-
Tacc1	ENSMUSG00000065954		0.137214	0.0173924	0.0454667		0.13736	0.00217328	0.01168		GO:0015630//microtubule cytoskeleton;GO:0005737//cytoplasm;GO:0005856//cytoskeleton;GO:0005634//nucleus;GO:0005815//microtubule organizing center;GO:0030496//midbody	GO:0051301//cell division;GO:0008283//cell proliferation;GO:0021987//cerebral cortex development;GO:0032886//regulation of microtubule-based process;GO:0022008//neurogenesis;GO:0022027//interkinetic nuclear migration;GO:0000226//microtubule cytoskeleton organization;GO:0007049//cell cycle	GO:0019904//protein domain specific binding	-
Taf5l	ENSMUSG00000038697		0.158294	0.0158134	0.0418183		0.210105	0.000185504	0.00147141		GO:0030914//STAGA complex;GO:0016607//nuclear speck;GO:0033276//transcription factor TFTC complex;GO:0005634//nucleus;GO:0036464//cytoplasmic ribonucleoprotein granule	GO:0043966//histone H3 acetylation;GO:0006351//transcription, DNA-templated;GO:0006355//regulation of transcription, DNA-templated	GO:0003713//transcription coactivator activity;GO:0004402//histone acetyltransferase activity	K03130//Basal transcription factors;Herpes simplex infection
Tank	ENSMUSG00000064289		0.165899	0.00582463	0.0174144		0.301467	7.72e-08	1.48e-06		GO:0005829//cytosol;GO:0005737//cytoplasm;GO:0043234//protein complex	GO:0071479//cellular response to ionizing radiation;GO:0006974//cellular response to DNA damage stimulus;GO:0071356//cellular response to tumor necrosis factor;GO:0071347//cellular response to interleukin-1;GO:0043124//negative regulation of I-kappaB kinase/NF-kappaB signaling;GO:2000158//positive regulation of ubiquitin-specific protease activity;GO:1903003//positive regulation of protein deubiq…	GO:0005515//protein binding;GO:0035800//deubiquitinase activator activity;GO:0031625//ubiquitin protein ligase binding;GO:0004843//thiol-dependent ubiquitin-specific protease activity;GO:0046872//metal ion binding	K12650//RIG-I-like receptor signaling pathway
Tbc1d2b	ENSMUSG00000037410		1.17821	1.73e-84	1.49e-82		0.374264	1.27e-14	6.95e-13		GO:0012505//endomembrane system;GO:0005622//intracellular	GO:0090630//activation of GTPase activity;GO:0006886//intracellular protein transport;GO:0031338//regulation of vesicle fusion	GO:0005096//GTPase activator activity;GO:0017137//Rab GTPase binding	-
Tbl3	ENSMUSG00000040688		0.269866	3.91e-05	0.000180411		0.148434	0.0114122	0.0452695		GO:0005634//nucleus;GO:0032040//small-subunit processome;GO:0005730//nucleolus;GO:0034388//Pwp2p-containing subcomplex of 90S preribosome	GO:0000462//maturation of SSU-rRNA from tricistronic rRNA transcript (SSU-rRNA, 5.8S rRNA, LSU-rRNA);GO:0006364//rRNA processing	GO:0003723//RNA binding;GO:0030515//snoRNA binding	K14555//Ribosome biogenesis in eukaryotes
Tcn2	ENSMUSG00000020432		0.704547	6.93e-16	8.96e-15		0.182004	0.00452142	0.0213964		GO:0070062//extracellular exosome;GO:0005576//extracellular region;GO:0005615//extracellular space	GO:0006811//ion transport;GO:0006824//cobalt ion transport;GO:0015889//cobalamin transport;GO:0006810//transport	GO:0031419//cobalamin binding;GO:0046872//metal ion binding	K14619//Vitamin digestion and absorption
Tek	ENSMUSG00000006386		1.64761	1.2e-14	1.44e-13		0.646835	1.36e-06	1.97e-05		GO:0005925//focal adhesion;GO:0016324//apical plasma membrane;GO:0005902//microvillus;GO:0005911//cell-cell junction;GO:0005884//actin filament;GO:0045121//membrane raft;GO:0016021//integral component of membrane;GO:0009925//basal plasma membrane;GO:0016323//basolateral plasma membrane;GO:0005815//microtubule organizing center;GO:0005576//extracellular region;GO:0005886//plasma membrane;GO:000172…	GO:0032878//regulation of establishment or maintenance of cell polarity;GO:1902533//positive regulation of intracellular signal transduction;GO:0030949//positive regulation of vascular endothelial growth factor receptor signaling pathway;GO:1901222//regulation of NIK/NF-kappaB signaling;GO:0045785//positive regulation of cell adhesion;GO:0007169//transmembrane receptor protein tyrosine kinase sig…	GO:0004714//transmembrane receptor protein tyrosine kinase activity;GO:0004713//protein tyrosine kinase activity;GO:0004872//receptor activity;GO:0019838//growth factor binding;GO:0016740//transferase activity;GO:0005524//ATP binding;GO:0005515//protein binding;GO:0016301//kinase activity;GO:0004672//protein kinase activity;GO:0000166//nucleotide binding	K05121//Rheumatoid arthritis;PI3K-Akt signaling pathway;HIF-1 signaling pathway;Rap1 signaling pathway;Ras signaling pathway
Tex10	ENSMUSG00000028345		0.158322	0.00346795	0.0109588		0.285063	1.59e-08	3.54e-07		GO:0005634//nucleus;GO:0071339//MLL1 complex;GO:0097344//Rix1 complex;GO:0005737//cytoplasm;GO:0005654//nucleoplasm;GO:0005730//nucleolus	-	-	-
Tgfbr1	ENSMUSG00000007613		0.19511	0.000270921	0.00108494		0.324122	4.35e-10	1.29e-08		GO:0016020//membrane;GO:0005886//plasma membrane;GO:0045121//membrane raft;GO:0043231//intracellular membrane-bounded organelle;GO:0016021//integral component of membrane;GO:0009986//cell surface;GO:0005901//caveola;GO:0005768//endosome;GO:0030054//cell junction;GO:0005923//bicellular tight junction;GO:0005622//intracellular;GO:0043235//receptor complex;GO:0005623//cell	GO:0051496//positive regulation of stress fiber assembly;GO:0009791//post-embryonic development;GO:0031396//regulation of protein ubiquitination;GO:0003222//ventricular trabecula myocardium morphogenesis;GO:0007507//heart development;GO:0023014//signal transduction by protein phosphorylation;GO:0001938//positive regulation of endothelial cell proliferation;GO:0048870//cell motility;GO:0010628//po…	GO:0046332//SMAD binding;GO:0005102//receptor binding;GO:0016301//kinase activity;GO:0046872//metal ion binding;GO:0016740//transferase activity;GO:0005024//transforming growth factor beta-activated receptor activity;GO:0005524//ATP binding;GO:0004702//signal transducer, downstream of receptor, with serine/threonine kinase activity;GO:0005025//transforming growth factor beta receptor activity, ty…	K04674//Cytokine-cytokine receptor interaction;Adherens junction;FoxO signaling pathway;MAPK signaling pathway;HTLV-I infection;Hippo signaling pathway;TGF-beta signaling pathway;Pancreatic cancer;Chagas disease (American trypanosomiasis);Pathways in cancer;Chronic myeloid leukemia;Endocytosis;Hepatitis B;Osteoclast differentiation;Colorectal cancer
Tgtp1	ENSMUSG00000078922		0.925539	6.41e-10	5.27e-09		0.595164	1.9e-11	6.94e-10		GO:0005622//intracellular;GO:0005794//Golgi apparatus;GO:0005789//endoplasmic reticulum membrane;GO:0005737//cytoplasm;GO:0005783//endoplasmic reticulum;GO:0016020//membrane	GO:0009615//response to virus;GO:0035455//response to interferon-alpha;GO:0002376//immune system process;GO:0034341//response to interferon-gamma;GO:0035458//cellular response to interferon-beta;GO:0006952//defense response;GO:0045087//innate immune response;GO:0006955//immune response	GO:0000166//nucleotide binding;GO:0005525//GTP binding;GO:0016787//hydrolase activity;GO:0003924//GTPase activity	-
Thada	ENSMUSG00000024251		0.277087	7.91e-05	0.000346595		0.202222	0.0010786	0.00661109		GO:0005783//endoplasmic reticulum	GO:0032471//negative regulation of endoplasmic reticulum calcium ion concentration;GO:0055088//lipid homeostasis	-	-
Tigd2	ENSMUSG00000049232		0.473645	1.84e-15	2.31e-14		0.443477	1.84e-15	1.09e-13		GO:0005634//nucleus	-	GO:0003677//DNA binding;GO:0003676//nucleic acid binding	-
Timm10	ENSMUSG00000027076		0.485206	0.00781456	0.0226087		0.74943	0.00698286	0.0304847		GO:0042719//mitochondrial intermembrane space protein transporter complex;GO:0005739//mitochondrion;GO:0042721//mitochondrial inner membrane protein insertion complex;GO:0016020//membrane;GO:0005743//mitochondrial inner membrane	GO:0006810//transport;GO:0072321//chaperone-mediated protein transport;GO:0045039//protein import into mitochondrial inner membrane;GO:0015031//protein transport	GO:0046872//metal ion binding;GO:0051087//chaperone binding;GO:0042803//protein homodimerization activity;GO:0005215//transporter activity;GO:0008565//protein transporter activity	-
Timm8a1	ENSMUSG00000048007		0.351648	0.000370904	0.00144655		0.337875	5.93e-07	9.49e-06		GO:0005758//mitochondrial intermembrane space;GO:0005743//mitochondrial inner membrane;GO:0016020//membrane;GO:0005739//mitochondrion	GO:0015031//protein transport;GO:0006810//transport	GO:0046872//metal ion binding	-
Timp4	ENSMUSG00000030317		6.40454	2.56e-93	2.41e-91		0.851137	6.81e-25	9.88e-23		GO:0005615//extracellular space;GO:0030017//sarcomere;GO:0005578//proteinaceous extracellular matrix;GO:0005576//extracellular region	GO:0032496//response to lipopolysaccharide;GO:0010466//negative regulation of peptidase activity;GO:0010951//negative regulation of endopeptidase activity;GO:0009725//response to hormone;GO:0051045//negative regulation of membrane protein ectodomain proteolysis;GO:0042698//ovulation cycle;GO:0043086//negative regulation of catalytic activity;GO:0042493//response to drug;GO:0034097//response to cy…	GO:0030414//peptidase inhibitor activity;GO:0002020//protease binding;GO:0008270//zinc ion binding;GO:0004857//enzyme inhibitor activity;GO:0008191//metalloendopeptidase inhibitor activity;GO:0046872//metal ion binding	-
Tlr4	ENSMUSG00000039005		1.15741	1.18e-68	7.6e-67		0.571085	6.93e-26	1.09e-23		GO:0005887//integral component of plasma membrane;GO:0043235//receptor complex;GO:0005622//intracellular;GO:0009897//external side of plasma membrane;GO:0046696//lipopolysaccharide receptor complex;GO:0005737//cytoplasm;GO:0016021//integral component of membrane;GO:0009986//cell surface;GO:0048471//perinuclear region of cytoplasm;GO:0031226//intrinsic component of plasma membrane;GO:0016020//memb…	GO:1900017//positive regulation of cytokine production involved in inflammatory response;GO:0032735//positive regulation of interleukin-12 production;GO:0043032//positive regulation of macrophage activation;GO:0000187//activation of MAPK activity;GO:0002322//B cell proliferation involved in immune response;GO:0002376//immune system process;GO:0070374//positive regulation of ERK1 and ERK2 cascade;…	GO:0046982//protein heterodimerization activity;GO:0004888//transmembrane signaling receptor activity;GO:0001530//lipopolysaccharide binding;GO:0001875//lipopolysaccharide receptor activity;GO:0005102//receptor binding;GO:0005515//protein binding	K10160//Amoebiasis;Influenza A;Toll-like receptor signaling pathway;Pathogenic Escherichia coli infection;Malaria;Toxoplasmosis;Measles;Inflammatory bowel disease (IBD);Chagas disease (American trypanosomiasis);Leishmaniasis;Legionellosis;Proteoglycans in cancer;Tuberculosis;Rheumatoid arthritis;Pertussis;PI3K-Akt signaling pathway;Phagosome;HIF-1 signaling pathway;Salmonella infection;Hepatitis …
Tm4sf1	ENSMUSG00000027800		1.21567	1.31e-54	6.34e-53		1.04489	2.78e-52	2.05e-49		GO:0016020//membrane;GO:0016021//integral component of membrane;GO:0005887//integral component of plasma membrane	-	-	-
Tma16	ENSMUSG00000025591		0.194217	0.00812251	0.023353		0.271158	3.63e-05	0.000362955		GO:0005634//nucleus;GO:0005840//ribosome;GO:0005730//nucleolus	-	-	-
Tmed5	ENSMUSG00000063406		0.242858	4.97e-05	0.000225905		0.346069	1.59e-11	5.92e-10		GO:0005794//Golgi apparatus;GO:0005783//endoplasmic reticulum;GO:0070971//endoplasmic reticulum exit site;GO:0016021//integral component of membrane;GO:0005789//endoplasmic reticulum membrane;GO:0033116//endoplasmic reticulum-Golgi intermediate compartment membrane;GO:0005793//endoplasmic reticulum-Golgi intermediate compartment;GO:0005801//cis-Golgi network;GO:0016020//membrane	GO:0006810//transport;GO:0090161//Golgi ribbon formation;GO:0015031//protein transport	-	-
Tmem132b	ENSMUSG00000070498		2.29512	2.97e-06	1.63e-05		1.36365	1.81e-07	3.22e-06		GO:0016020//membrane;GO:0016021//integral component of membrane	-	-	-
Tmem167	ENSMUSG00000012422		0.507345	9.07e-17	1.23e-15		0.303724	2.41e-09	6.26e-08		GO:0016020//membrane;GO:0016021//integral component of membrane;GO:0005794//Golgi apparatus;GO:0012505//endomembrane system;GO:0000139//Golgi membrane	GO:0009306//protein secretion;GO:0046907//intracellular transport	-	-
Tmem198b	ENSMUSG00000047090		0.241493	0.00116681	0.00412103		0.212419	0.00205789	0.0111776		GO:0016021//integral component of membrane;GO:0016020//membrane	-	-	-
Tmem199	ENSMUSG00000051232		0.271197	0.00355079	0.0111842		0.211508	0.00344464	0.0171398		GO:0016020//membrane;GO:0016471//vacuolar proton-transporting V-type ATPase complex;GO:0030663//COPI-coated vesicle membrane;GO:0033116//endoplasmic reticulum-Golgi intermediate compartment membrane;GO:0005764//lysosome;GO:0005783//endoplasmic reticulum;GO:0016021//integral component of membrane;GO:0005789//endoplasmic reticulum membrane;GO:0031410//cytoplasmic vesicle	GO:0006879//cellular iron ion homeostasis;GO:1905146//lysosomal protein catabolic process;GO:0036295//cellular response to increased oxygen levels;GO:0007042//lysosomal lumen acidification;GO:0070072//vacuolar proton-transporting V-type ATPase complex assembly	-	-
Tmem38b	ENSMUSG00000028420		1.3458	1.33e-55	6.56e-54		0.185997	0.00237687	0.0126131		GO:0016021//integral component of membrane;GO:0005789//endoplasmic reticulum membrane;GO:0005783//endoplasmic reticulum;GO:0005634//nucleus;GO:0016020//membrane	GO:0015672//monovalent inorganic cation transport;GO:0006810//transport;GO:0006813//potassium ion transport;GO:0098655//cation transmembrane transport;GO:0006811//ion transport;GO:0071805//potassium ion transmembrane transport	GO:0015269//calcium-activated potassium channel activity;GO:0005261//cation channel activity;GO:0005267//potassium channel activity	-
Tnfaip2	ENSMUSG00000021281		1.71361	1.83e-21	3.15e-20		1.91699	1.72e-104	6.98e-101		GO:0000145//exocyst	GO:0030154//cell differentiation;GO:0007275//multicellular organism development;GO:0006887//exocytosis;GO:0001525//angiogenesis;GO:0051601//exocyst localization	GO:0000149//SNARE binding	-
Tnfrsf1b	ENSMUSG00000028599		1.08361	7.84e-46	3.02e-44		0.332087	4.21e-10	1.25e-08		GO:0005634//nucleus;GO:0016020//membrane;GO:0016021//integral component of membrane;GO:0048471//perinuclear region of cytoplasm;GO:0045121//membrane raft;GO:0043196//varicosity;GO:0030424//axon;GO:0005622//intracellular;GO:0043025//neuronal cell body;GO:0005887//integral component of plasma membrane	GO:0071363//cellular response to growth factor stimulus;GO:0033209//tumor necrosis factor-mediated signaling pathway;GO:0007166//cell surface receptor signaling pathway;GO:0006954//inflammatory response;GO:0008630//intrinsic apoptotic signaling pathway in response to DNA damage;GO:0043154//negative regulation of cysteine-type endopeptidase activity involved in apoptotic process;GO:0050779//RNA de…	GO:0031625//ubiquitin protein ligase binding;GO:0005031//tumor necrosis factor-activated receptor activity;GO:0005515//protein binding	K05141//Amyotrophic lateral sclerosis (ALS);Cytokine-cytokine receptor interaction;Adipocytokine signaling pathway;TNF signaling pathway
Top1	ENSMUSG00000070544		0.257521	1.69e-06	9.6e-06		0.34243	1.49e-14	8.05e-13		GO:0005634//nucleus;GO:0000932//P-body;GO:0009330//DNA topoisomerase complex (ATP-hydrolyzing);GO:0005654//nucleoplasm;GO:0005694//chromosome;GO:0032993//protein-DNA complex;GO:0001650//fibrillar center;GO:0005737//cytoplasm;GO:0043204//perikaryon;GO:0000228//nuclear chromosome;GO:0005730//nucleolus;GO:0031298//replication fork protection complex	GO:0032922//circadian regulation of gene expression;GO:0048511//rhythmic process;GO:0040016//embryonic cleavage;GO:0006338//chromatin remodeling;GO:0007623//circadian rhythm;GO:0007059//chromosome segregation;GO:0006265//DNA topological change;GO:0018105//peptidyl-serine phosphorylation;GO:0042493//response to drug;GO:0006260//DNA replication	GO:0004674//protein serine/threonine kinase activity;GO:0003917//DNA topoisomerase type I activity;GO:0097100//supercoiled DNA binding;GO:0003723//RNA binding;GO:0003697//single-stranded DNA binding;GO:0001046//core promoter sequence-specific DNA binding;GO:0016853//isomerase activity;GO:0003916//DNA topoisomerase activity;GO:0003677//DNA binding;GO:0005524//ATP binding;GO:0019904//protein domain…	-
Trak2	ENSMUSG00000026028		0.262859	0.00212264	0.00708781		0.194815	0.00445715	0.0211845		GO:0005769//early endosome;GO:0043005//neuron projection;GO:0005886//plasma membrane;GO:0005634//nucleus;GO:0005739//mitochondrion;GO:0043025//neuronal cell body;GO:0032839//dendrite cytoplasm;GO:0044295//axonal growth cone;GO:0005737//cytoplasm;GO:0030425//dendrite	GO:0098972//anterograde dendritic transport of mitochondrion;GO:0006605//protein targeting;GO:0008333//endosome to lysosome transport;GO:0006493//protein O-linked glycosylation;GO:0050771//negative regulation of axonogenesis;GO:0006357//regulation of transcription from RNA polymerase II promoter;GO:0048813//dendrite morphogenesis;GO:0098939//dendritic transport of mitochondrion	GO:0030911//TPR domain binding;GO:0019899//enzyme binding;GO:0005102//receptor binding;GO:0019894//kinesin binding;GO:0050811//GABA receptor binding	K15374//Metabolic pathways;GABAergic synapse
Trim47	ENSMUSG00000020773		2.25719	5.62e-76	4.14e-74		0.214371	0.00852218	0.0357535		GO:0005622//intracellular;GO:0005634//nucleus;GO:0005829//cytosol;GO:0005737//cytoplasm	-	GO:0046872//metal ion binding;GO:0008270//zinc ion binding	-
Trio	ENSMUSG00000022263		0.302202	0.000393731	0.00152842		0.434348	1.61e-12	6.83e-11		GO:0005737//cytoplasm	GO:0045599//negative regulation of fat cell differentiation;GO:0006468//protein phosphorylation;GO:0065009//regulation of molecular function;GO:0035023//regulation of Rho protein signal transduction;GO:0016310//phosphorylation	GO:0016740//transferase activity;GO:0005524//ATP binding;GO:0004674//protein serine/threonine kinase activity;GO:0019899//enzyme binding;GO:0000166//nucleotide binding;GO:0005085//guanyl-nucleotide exchange factor activity;GO:0016301//kinase activity;GO:0004672//protein kinase activity;GO:0005089//Rho guanyl-nucleotide exchange factor activity	-
Triobp	ENSMUSG00000033088		0.465546	9.75e-12	9.32e-11		0.1383	0.0100517	0.0409227		GO:0015629//actin cytoskeleton;GO:0005925//focal adhesion;GO:0005815//microtubule organizing center;GO:0030496//midbody;GO:0005634//nucleus;GO:0005856//cytoskeleton;GO:0005737//cytoplasm	GO:1900026//positive regulation of substrate adhesion-dependent cell spreading;GO:0051301//cell division;GO:0032956//regulation of actin cytoskeleton organization;GO:0007049//cell cycle	GO:0031625//ubiquitin protein ligase binding;GO:0003779//actin binding;GO:0051015//actin filament binding	-
Trmt10c	ENSMUSG00000044763		0.277129	0.00542072	0.0163467		0.332764	9.97e-06	0.000116055		GO:0005654//nucleoplasm;GO:0005739//mitochondrion;GO:0042645//mitochondrial nucleoid	GO:0032259//methylation;GO:0008033//tRNA processing;GO:0090646//mitochondrial tRNA processing;GO:0030488//tRNA methylation;GO:0070131//positive regulation of mitochondrial translation;GO:0000964//mitochondrial RNA 5'-end processing	GO:0016740//transferase activity;GO:0009019//tRNA (guanine-N1-)-methyltransferase activity;GO:0016429//tRNA (adenine-N1-)-methyltransferase activity;GO:0003723//RNA binding;GO:0008168//methyltransferase activity	-
Trmt11	ENSMUSG00000019792		0.335313	0.00100844	0.00361773		0.313033	0.000140131	0.00115843		-	GO:0032259//methylation	GO:0008168//methyltransferase activity;GO:0003676//nucleic acid binding	-
Trmt6	ENSMUSG00000037376		0.206208	0.00132147	0.00460307		0.204143	0.000425564	0.00298723		GO:0005634//nucleus;GO:0031515//tRNA (m1A) methyltransferase complex	GO:0008033//tRNA processing;GO:0030488//tRNA methylation	GO:0003723//RNA binding	-
Trmt61a	ENSMUSG00000060950		0.286484	0.0159417	0.0421217		0.705819	2.48e-14	1.3e-12		GO:0005634//nucleus;GO:0031515//tRNA (m1A) methyltransferase complex	GO:0030488//tRNA methylation;GO:0032259//methylation;GO:0008033//tRNA processing	GO:0016429//tRNA (adenine-N1-)-methyltransferase activity;GO:0008168//methyltransferase activity;GO:0016740//transferase activity	-
Trnt1	ENSMUSG00000013736		0.158456	0.0128923	0.0349819		0.146162	0.00540628	0.0247536		GO:0005622//intracellular;GO:0005739//mitochondrion	GO:0001680//tRNA 3'-terminal CCA addition;GO:0008033//tRNA processing;GO:0006396//RNA processing;GO:1990180//mitochondrial tRNA 3'-end processing	GO:0052927//CTP:tRNA cytidylyltransferase activity;GO:0000166//nucleotide binding;GO:0016779//nucleotidyltransferase activity;GO:0052929//ATP:3'-cytidine-cytidine-tRNA adenylyltransferase activity;GO:0003723//RNA binding;GO:0009022//tRNA nucleotidyltransferase activity;GO:0052928//CTP:3'-cytidine-tRNA cytidylyltransferase activity;GO:0000049//tRNA binding;GO:0005524//ATP binding;GO:0016740//trans…	K00974//RNA transport
Tsku	ENSMUSG00000049580		0.735656	4.77e-18	7.02e-17		0.292636	6.33e-05	0.000586302		GO:0005576//extracellular region;GO:0005886//plasma membrane;GO:0005615//extracellular space	GO:0021540//corpus callosum morphogenesis;GO:0010468//regulation of gene expression;GO:0030178//negative regulation of Wnt signaling pathway;GO:0061073//ciliary body morphogenesis;GO:0043010//camera-type eye development;GO:0021670//lateral ventricle development;GO:0021960//anterior commissure morphogenesis;GO:0007188//adenylate cyclase-modulating G-protein coupled receptor signaling pathway	GO:0005515//protein binding;GO:0004930//G-protein coupled receptor activity	-
Tspan5	ENSMUSG00000028152		0.18555	0.00227573	0.00754546		0.202217	0.000159046	0.00129243		GO:0005887//integral component of plasma membrane;GO:0005886//plasma membrane;GO:0016020//membrane;GO:0016021//integral component of membrane	GO:0045747//positive regulation of Notch signaling pathway;GO:0072659//protein localization to plasma membrane;GO:0051604//protein maturation;GO:0007166//cell surface receptor signaling pathway	GO:0019899//enzyme binding	-
Tuba1c	ENSMUSG00000043091		0.44157	1.11e-12	1.14e-11		0.605339	3.53e-33	8.55e-31		GO:0005881//cytoplasmic microtubule;GO:0005856//cytoskeleton;GO:0005737//cytoplasm;GO:0015630//microtubule cytoskeleton;GO:0005874//microtubule;GO:0005634//nucleus;GO:0031982//vesicle	GO:0007010//cytoskeleton organization;GO:0007017//microtubule-based process	GO:0005200//structural constituent of cytoskeleton;GO:0000166//nucleotide binding;GO:0003924//GTPase activity;GO:0005525//GTP binding	K07374//Phagosome;Pathogenic Escherichia coli infection;Gap junction
Tubb4b	ENSMUSG00000036752		0.149965	0.00899178	0.0255773		0.176354	0.000351487	0.00253633		GO:0005874//microtubule;GO:0005856//cytoskeleton;GO:0005634//nucleus;GO:0031012//extracellular matrix;GO:0015630//microtubule cytoskeleton;GO:0005737//cytoplasm;GO:1903561//extracellular vesicle;GO:0043209//myelin sheath;GO:0045298//tubulin complex;GO:0070062//extracellular exosome	GO:0007010//cytoskeleton organization;GO:0007017//microtubule-based process	GO:0003924//GTPase activity;GO:0003725//double-stranded RNA binding;GO:0005525//GTP binding;GO:0005200//structural constituent of cytoskeleton;GO:0000166//nucleotide binding	K07375//Gap junction;Pathogenic Escherichia coli infection;Phagosome
Tut1	ENSMUSG00000071645		0.186833	0.00702037	0.0205498		0.20784	0.00118607	0.00712694		GO:0005829//cytosol;GO:0005847//mRNA cleavage and polyadenylation specificity factor complex;GO:0005634//nucleus;GO:0016607//nuclear speck;GO:0005730//nucleolus	GO:0098789//pre-mRNA cleavage required for polyadenylation;GO:0016180//snRNA processing;GO:0006397//mRNA processing;GO:0006378//mRNA polyadenylation	GO:0003730//mRNA 3'-UTR binding;GO:0003723//RNA binding;GO:0016779//nucleotidyltransferase activity;GO:0019899//enzyme binding;GO:0004652//polynucleotide adenylyltransferase activity;GO:0016740//transferase activity;GO:0008270//zinc ion binding;GO:0005524//ATP binding;GO:0046872//metal ion binding;GO:0000166//nucleotide binding;GO:0050265//RNA uridylyltransferase activity;GO:0003676//nucleic acid…	-
Twist2	ENSMUSG00000007805		1.9733	5.11e-117	6.29e-115		0.415912	1.32e-11	4.95e-10		GO:0005730//nucleolus;GO:0005737//cytoplasm;GO:0005634//nucleus	GO:0045668//negative regulation of osteoblast differentiation;GO:0043066//negative regulation of apoptotic process	GO:0046983//protein dimerization activity	K09069//Proteoglycans in cancer
Uaca	ENSMUSG00000034485		0.270725	8.74e-06	4.48e-05		0.221106	3.12e-05	0.000318504		GO:0005829//cytosol;GO:0005634//nucleus;GO:0070062//extracellular exosome	GO:1901222//regulation of NIK/NF-kappaB signaling;GO:0097190//apoptotic signaling pathway	-	-
Ubxn2b	ENSMUSG00000028243		0.526695	7.22e-11	6.45e-10		0.246787	0.00237804	0.0126134		GO:0005794//Golgi apparatus;GO:0005829//cytosol;GO:0005634//nucleus;GO:0005783//endoplasmic reticulum;GO:0005737//cytoplasm	GO:0007030//Golgi organization;GO:0031468//nuclear envelope reassembly;GO:0050790//regulation of catalytic activity;GO:0043161//proteasome-mediated ubiquitin-dependent protein catabolic process;GO:0000045//autophagosome assembly;GO:0061025//membrane fusion	GO:0019888//protein phosphatase regulator activity;GO:0043130//ubiquitin binding	-
Urb1	ENSMUSG00000039929		0.389163	0.00039219	0.00152272		0.518896	1.1e-10	3.65e-09		GO:0005730//nucleolus;GO:0001650//fibrillar center	-	GO:0003723//RNA binding	-
Utp14a	ENSMUSG00000063785		0.394598	4.25e-06	2.28e-05		0.189346	0.00270921	0.0141111		GO:0005829//cytosol;GO:0005634//nucleus;GO:0032040//small-subunit processome;GO:0005730//nucleolus	GO:0006364//rRNA processing;GO:0042254//ribosome biogenesis;GO:0030490//maturation of SSU-rRNA	GO:0003723//RNA binding	K14567//Ribosome biogenesis in eukaryotes
Utp15	ENSMUSG00000041747		0.343634	7.15e-06	3.73e-05		0.238705	0.000546063	0.00370183		GO:0005783//endoplasmic reticulum;GO:0001650//fibrillar center;GO:0005634//nucleus;GO:0005737//cytoplasm;GO:0005730//nucleolus	GO:0045943//positive regulation of transcription from RNA polymerase I promoter;GO:2000234//positive regulation of rRNA processing;GO:0042254//ribosome biogenesis;GO:0006351//transcription, DNA-templated;GO:0006364//rRNA processing;GO:0006355//regulation of transcription, DNA-templated	GO:0003723//RNA binding	K14549//Ribosome biogenesis in eukaryotes
Utp18	ENSMUSG00000054079		0.204088	0.0121472	0.0332306		0.493277	3.36e-17	2.44e-15		GO:0031965//nuclear membrane;GO:0034388//Pwp2p-containing subcomplex of 90S preribosome;GO:0005730//nucleolus;GO:0005634//nucleus;GO:0032040//small-subunit processome	GO:0006364//rRNA processing;GO:0000462//maturation of SSU-rRNA from tricistronic rRNA transcript (SSU-rRNA, 5.8S rRNA, LSU-rRNA)	GO:0003723//RNA binding	K14553//Ribosome biogenesis in eukaryotes
Vasp	ENSMUSG00000030403		0.181117	0.00325907	0.0103709		0.330697	7.74e-11	2.64e-09		GO:0042995//cell projection;GO:0030054//cell junction;GO:0005737//cytoplasm;GO:0031527//filopodium membrane;GO:0031258//lamellipodium membrane;GO:0070062//extracellular exosome;GO:0005923//bicellular tight junction;GO:0005925//focal adhesion;GO:0005886//plasma membrane;GO:0005829//cytosol;GO:0016020//membrane;GO:0030175//filopodium;GO:0005856//cytoskeleton;GO:0030027//lamellipodium	GO:0008154//actin polymerization or depolymerization;GO:0030036//actin cytoskeleton organization;GO:0030838//positive regulation of actin filament polymerization;GO:0007411//axon guidance;GO:0051289//protein homotetramerization;GO:0001843//neural tube closure	GO:0005522//profilin binding;GO:0005515//protein binding;GO:0017124//SH3 domain binding;GO:0003779//actin binding;GO:0045296//cadherin binding	K06274//cGMP-PKG signaling pathway;Rap1 signaling pathway;Focal adhesion;Leukocyte transendothelial migration;Fc gamma R-mediated phagocytosis;Platelet activation
Vcan	ENSMUSG00000021614		3.69865	1.72e-282	7.15e-280		0.253756	3.96e-05	0.000391828		GO:0031012//extracellular matrix;GO:0005615//extracellular space;GO:0005576//extracellular region;GO:0016020//membrane	GO:0007155//cell adhesion;GO:0001649//osteoblast differentiation	GO:0005540//hyaluronic acid binding;GO:0005509//calcium ion binding	K05695//Adherens junction;Cell adhesion molecules (CAMs);Insulin signaling pathway;Insulin resistance
Vma21	ENSMUSG00000073131		0.264373	0.000167591	0.000695972		0.524278	8.18e-17	5.7e-15		GO:0033116//endoplasmic reticulum-Golgi intermediate compartment membrane;GO:0031410//cytoplasmic vesicle;GO:0012507//ER to Golgi transport vesicle membrane;GO:0005783//endoplasmic reticulum;GO:0016020//membrane;GO:0016021//integral component of membrane;GO:0005789//endoplasmic reticulum membrane	GO:0070072//vacuolar proton-transporting V-type ATPase complex assembly	-	-
Wdr12	ENSMUSG00000026019		0.435468	1.01e-07	6.64e-07		0.380969	5.31e-08	1.06e-06		GO:0005634//nucleus;GO:0070545//PeBoW complex;GO:0005654//nucleoplasm;GO:0005730//nucleolus;GO:0030687//preribosome, large subunit precursor	GO:0042273//ribosomal large subunit biogenesis;GO:0007219//Notch signaling pathway;GO:0000466//maturation of 5.8S rRNA from tricistronic rRNA transcript (SSU-rRNA, 5.8S rRNA, LSU-rRNA);GO:0042254//ribosome biogenesis;GO:0000460//maturation of 5.8S rRNA;GO:0000470//maturation of LSU-rRNA;GO:0006364//rRNA processing;GO:0008283//cell proliferation;GO:0000463//maturation of LSU-rRNA from tricistronic…	GO:0005515//protein binding;GO:0043021//ribonucleoprotein complex binding	-
Wdr3	ENSMUSG00000033285		0.52416	1.64e-14	1.94e-13		0.205963	0.000119412	0.00100978		GO:0005730//nucleolus;GO:0034388//Pwp2p-containing subcomplex of 90S preribosome;GO:0031965//nuclear membrane;GO:0005634//nucleus;GO:0032040//small-subunit processome	GO:0030490//maturation of SSU-rRNA	GO:0003723//RNA binding;GO:0030515//snoRNA binding	K14556//Ribosome biogenesis in eukaryotes
Wdr4	ENSMUSG00000024037		0.322898	0.000114528	0.000488536		0.332685	2.52e-06	3.41e-05		GO:0043527//tRNA methyltransferase complex;GO:0005829//cytosol;GO:0005634//nucleus;GO:0005654//nucleoplasm	GO:0106004//tRNA (guanine-N7)-methylation;GO:0006400//tRNA modification;GO:0008033//tRNA processing;GO:0036265//RNA (guanine-N7)-methylation;GO:0030488//tRNA methylation	GO:0008176//tRNA (guanine-N7-)-methyltransferase activity	-
Wdr46	ENSMUSG00000024312		0.248721	0.000336708	0.00132632		0.183819	0.00110501	0.00673274		GO:0030686//90S preribosome;GO:0005634//nucleus;GO:0032040//small-subunit processome;GO:0005730//nucleolus	GO:0000462//maturation of SSU-rRNA from tricistronic rRNA transcript (SSU-rRNA, 5.8S rRNA, LSU-rRNA);GO:1903955//positive regulation of protein targeting to mitochondrion	GO:0003723//RNA binding	-
Wdr55	ENSMUSG00000042660		0.450696	1.61e-07	1.04e-06		0.181061	0.00996525	0.0406522		GO:0005634//nucleus;GO:0005737//cytoplasm;GO:0005730//nucleolus	GO:0006364//rRNA processing;GO:0042273//ribosomal large subunit biogenesis	-	-
Wipf1	ENSMUSG00000075284		0.32936	1.38e-06	7.95e-06		0.330234	5.7e-08	1.13e-06		GO:0031410//cytoplasmic vesicle;GO:0015629//actin cytoskeleton;GO:0005884//actin filament;GO:0005737//cytoplasm;GO:0001726//ruffle;GO:0005856//cytoskeleton;GO:0042995//cell projection	GO:0051707//response to other organism;GO:0008154//actin polymerization or depolymerization;GO:0030048//actin filament-based movement	GO:0017124//SH3 domain binding;GO:0005515//protein binding;GO:0003779//actin binding	K19475//Endocytosis
Wnk4	ENSMUSG00000035112		0.634037	7.43e-08	4.94e-07		0.330935	0.00180143	0.0100681		GO:0005737//cytoplasm;GO:0016020//membrane;GO:0030054//cell junction;GO:0005829//cytosol;GO:0005923//bicellular tight junction	GO:0065009//regulation of molecular function;GO:0006811//ion transport;GO:0030644//cellular chloride ion homeostasis;GO:0050794//regulation of cellular process;GO:0070294//renal sodium ion absorption;GO:0016310//phosphorylation;GO:0035556//intracellular signal transduction;GO:0010766//negative regulation of sodium ion transport;GO:0072156//distal tubule morphogenesis;GO:0090188//negative regulati…	GO:0005524//ATP binding;GO:0005515//protein binding;GO:0016740//transferase activity;GO:0004674//protein serine/threonine kinase activity;GO:0000166//nucleotide binding;GO:0004672//protein kinase activity;GO:0019869//chloride channel inhibitor activity;GO:0016301//kinase activity	-
Wwp1	ENSMUSG00000041058		0.86188	4.77e-31	1.19e-29		0.501702	1.86e-16	1.24e-14		GO:0070062//extracellular exosome;GO:0005737//cytoplasm;GO:0005886//plasma membrane;GO:0005829//cytosol;GO:0005634//nucleus;GO:0016020//membrane	GO:0043161//proteasome-mediated ubiquitin-dependent protein catabolic process;GO:0006511//ubiquitin-dependent protein catabolic process;GO:0030217//T cell differentiation;GO:0016567//protein ubiquitination;GO:0045892//negative regulation of transcription, DNA-templated;GO:0042787//protein ubiquitination involved in ubiquitin-dependent protein catabolic process;GO:0030324//lung development	GO:0004842//ubiquitin-protein transferase activity;GO:0061630//ubiquitin protein ligase activity;GO:0005515//protein binding;GO:0016740//transferase activity	K05633//Endocytosis;Ubiquitin mediated proteolysis
Xpr1	ENSMUSG00000026469		0.644366	2.07e-17	2.94e-16		0.142181	0.00966024	0.039637		GO:0016021//integral component of membrane;GO:0005737//cytoplasm;GO:0005886//plasma membrane;GO:0016020//membrane;GO:0031226//intrinsic component of plasma membrane	GO:0030643//cellular phosphate ion homeostasis;GO:0035435//phosphate ion transmembrane transport;GO:0046718//viral entry into host cell;GO:0009615//response to virus	GO:0015562//efflux transmembrane transporter activity;GO:0000822//inositol hexakisphosphate binding;GO:0015114//phosphate ion transmembrane transporter activity;GO:0004872//receptor activity;GO:0001618//virus receptor activity	-
Zcchc4	ENSMUSG00000029179		0.328151	1.76e-05	8.6e-05		0.315066	2.92e-06	3.87e-05		-	GO:0032259//methylation	GO:0016746//transferase activity, transferring acyl groups;GO:0016740//transferase activity;GO:0008270//zinc ion binding;GO:0003676//nucleic acid binding;GO:0046872//metal ion binding;GO:0008168//methyltransferase activity	-
Zfp217	ENSMUSG00000052056		0.533456	1.09e-09	8.78e-09		0.271975	3.11e-06	4.11e-05		GO:0005654//nucleoplasm;GO:0005634//nucleus;GO:0000118//histone deacetylase complex	GO:0007569//cell aging;GO:0007165//signal transduction;GO:0045892//negative regulation of transcription, DNA-templated;GO:0006355//regulation of transcription, DNA-templated;GO:0000122//negative regulation of transcription from RNA polymerase II promoter;GO:0007275//multicellular organism development;GO:0006366//transcription from RNA polymerase II promoter	GO:0043565//sequence-specific DNA binding;GO:0001078//transcriptional repressor activity, RNA polymerase II core promoter proximal region sequence-specific binding;GO:0000978//RNA polymerase II core promoter proximal region sequence-specific DNA binding;GO:0003676//nucleic acid binding;GO:0044212//transcription regulatory region DNA binding	-
Zfp36l1	ENSMUSG00000021127		0.540111	5.13e-18	7.52e-17		0.265444	3.19e-05	0.000324123		GO:0000932//P-body;GO:0005737//cytoplasm;GO:0005634//nucleus;GO:0005829//cytosol;GO:0030529//intracellular ribonucleoprotein complex	GO:0007507//heart development;GO:0033077//T cell differentiation in thymus;GO:0045616//regulation of keratinocyte differentiation;GO:0038066//p38MAPK cascade;GO:0035264//multicellular organism growth;GO:0051028//mRNA transport;GO:0043488//regulation of mRNA stability;GO:0060712//spongiotrophoblast layer development;GO:0045577//regulation of B cell differentiation;GO:0014065//phosphatidylinositol …	GO:0003723//RNA binding;GO:0003729//mRNA binding;GO:0017091//AU-rich element binding;GO:0005515//protein binding;GO:0003677//DNA binding;GO:0046872//metal ion binding;GO:0071889//14-3-3 protein binding;GO:0035925//mRNA 3'-UTR AU-rich region binding	-
Zfp36l2	ENSMUSG00000045817		0.33605	7.52e-14	8.53e-13		0.272507	8.12e-08	1.55e-06		GO:0030529//intracellular ribonucleoprotein complex;GO:0005737//cytoplasm;GO:0005829//cytosol;GO:0005634//nucleus	GO:0007275//multicellular organism development;GO:0006402//mRNA catabolic process;GO:0070371//ERK1 and ERK2 cascade;GO:0044344//cellular response to fibroblast growth factor stimulus;GO:1904628//cellular response to phorbol 13-acetate 12-myristate;GO:0000165//MAPK cascade;GO:0071385//cellular response to glucocorticoid stimulus;GO:0009611//response to wounding;GO:0060216//definitive hemopoiesis;G…	GO:0046872//metal ion binding;GO:0003723//RNA binding;GO:0003677//DNA binding;GO:0035925//mRNA 3'-UTR AU-rich region binding;GO:0017091//AU-rich element binding	-
Zfp608	ENSMUSG00000052713		0.998648	4.29e-24	8.38e-23		0.420789	9.8e-12	3.72e-10		-	GO:0000122//negative regulation of transcription from RNA polymerase II promoter;GO:0006355//regulation of transcription, DNA-templated;GO:0006351//transcription, DNA-templated;GO:0033085//negative regulation of T cell differentiation in thymus	GO:0003676//nucleic acid binding;GO:0046872//metal ion binding	-
Zfp697	ENSMUSG00000050064		0.835674	3.02e-12	3e-11		0.250218	0.00288469	0.0148262		-	-	GO:0003676//nucleic acid binding	-
Zfp862-ps	ENSMUSG00000107476		0.79489	2.24e-35	6.52e-34		0.251853	5.18e-06	6.5e-05		-	-	-	-
Zpr1	ENSMUSG00000032078		0.358087	1.37e-06	7.85e-06		0.231772	0.000491805	0.00337202		GO:0005634//nucleus;GO:0030426//growth cone;GO:0005654//nucleoplasm;GO:0042995//cell projection;GO:0043204//perikaryon;GO:0097504//Gemini of coiled bodies;GO:0048471//perinuclear region of cytoplasm;GO:0005737//cytoplasm;GO:0015030//Cajal body;GO:0043025//neuronal cell body;GO:0032797//SMN complex;GO:0005730//nucleolus;GO:0030424//axon	GO:0042023//DNA endoreduplication;GO:0071364//cellular response to epidermal growth factor stimulus;GO:0030576//Cajal body organization;GO:0071931//positive regulation of transcription involved in G1/S transition of mitotic cell cycle;GO:0031641//regulation of myelination;GO:0030154//cell differentiation;GO:0008380//RNA splicing;GO:0007275//multicellular organism development;GO:1902742//apoptotic…	GO:0030971//receptor tyrosine kinase binding;GO:0046872//metal ion binding;GO:0031369//translation initiation factor binding;GO:0008270//zinc ion binding;GO:0005515//protein binding	-
Zwint	ENSMUSG00000019923		0.172698	0.0155632	0.0412726		0.358457	4.09e-11	1.44e-09		GO:0000775//chromosome, centromeric region;GO:0030425//dendrite;GO:0005737//cytoplasm;GO:0000777//condensed chromosome kinetochore;GO:0043231//intracellular membrane-bounded organelle;GO:0005694//chromosome;GO:0005654//nucleoplasm;GO:0000776//kinetochore;GO:0016604//nuclear body;GO:0005634//nucleus;GO:0005829//cytosol;GO:0043005//neuron projection	GO:0000070//mitotic sister chromatid segregation;GO:0007049//cell cycle;GO:0007093//mitotic cell cycle checkpoint;GO:0051649//establishment of localization in cell;GO:0051301//cell division	GO:0005515//protein binding;GO:0047485//protein N-terminus binding	-
1P value was derived from DESeq2; 2Fold, fold change; 3q value was derived from DESeq2.

## Sheet: table_S3_dn
Supplementary Table 3. mRNA significantly differential expressed in BMSCs.
Symbl	Gene ID		OM vs PM				C2S vs OM				Pathway enrichment
			log2Fold1	P value2	q value3		log2Fold1	P value2	q value3		Cellular Component	Biological Process	Molecular Function	KEGG
2019-03-09	ENSMUSG00000040502		-0.914148	7.16e-13	7.51e-12		-0.35649	0.0128442	0.0497249		GO:0000139//Golgi membrane;GO:0016020//membrane;GO:0005794//Golgi apparatus;GO:0005765//lysosomal membrane;GO:0005802//trans-Golgi network;GO:0005764//lysosome;GO:0005795//Golgi stack;GO:0016021//integral component of membrane	GO:0016567//protein ubiquitination	GO:0046872//metal ion binding;GO:0016740//transferase activity;GO:0008270//zinc ion binding	-
1190002N15Rik	ENSMUSG00000045414		-0.616036	2.46e-21	4.23e-20		-0.195865	0.000220671	0.00170692		GO:0005615//extracellular space;GO:0030137//COPI-coated vesicle;GO:0005576//extracellular region;GO:0030126//COPI vesicle coat;GO:0000139//Golgi membrane;GO:0031410//cytoplasmic vesicle;GO:0005794//Golgi apparatus	GO:0060038//cardiac muscle cell proliferation;GO:0048199//vesicle targeting, to, from or within Golgi;GO:0014066//regulation of phosphatidylinositol 3-kinase signaling	-	-
1810021B22Rik	ENSMUSG00000087331		-0.408495	0.0144901	0.0387111		-0.631443	0.00162227	0.00922239		-	-	-	-
A730056A06Rik	ENSMUSG00000097756		-1.6772	2.19e-23	4.13e-22		-0.672448	0.00547624	0.0250175		-	-	-	-
Abca1	ENSMUSG00000015243		-0.302882	0.000129614	0.000548887		-0.456419	3.53e-13	1.63e-11		GO:0034364//high-density lipoprotein particle;GO:0016020//membrane;GO:0005886//plasma membrane;GO:0009897//external side of plasma membrane;GO:0005887//integral component of plasma membrane;GO:0005794//Golgi apparatus;GO:0045335//phagocytic vesicle;GO:0043231//intracellular membrane-bounded organelle;GO:0045121//membrane raft;GO:0048471//perinuclear region of cytoplasm;GO:0016021//integral compon…	GO:0032489//regulation of Cdc42 protein signal transduction;GO:0071300//cellular response to retinoic acid;GO:0015914//phospholipid transport;GO:0071222//cellular response to lipopolysaccharide;GO:0033344//cholesterol efflux;GO:0042157//lipoprotein metabolic process;GO:0055085//transmembrane transport;GO:0032367//intracellular cholesterol transport;GO:0071397//cellular response to cholesterol;GO:…	GO:0042626//ATPase activity, coupled to transmembrane movement of substances;GO:0051117//ATPase binding;GO:0019905//syntaxin binding;GO:0005548//phospholipid transporter activity;GO:0031267//small GTPase binding;GO:0034186//apolipoprotein A-I binding;GO:0005102//receptor binding;GO:0016887//ATPase activity;GO:0017127//cholesterol transporter activity;GO:0090556//phosphatidylserine-translocating A…	K05641//Fat digestion and absorption;ABC transporters
Abca3	ENSMUSG00000024130		-0.377935	2.91e-08	2.02e-07		-0.255047	4.83e-05	0.000466582		GO:0005615//extracellular space;GO:0016021//integral component of membrane;GO:0043231//intracellular membrane-bounded organelle;GO:0097233//alveolar lamellar body membrane;GO:0005886//plasma membrane;GO:0097208//alveolar lamellar body;GO:0016020//membrane	GO:0006869//lipid transport;GO:0006810//transport;GO:0051384//response to glucocorticoid;GO:0055085//transmembrane transport	GO:0000166//nucleotide binding;GO:0005524//ATP binding;GO:0016887//ATPase activity;GO:0042626//ATPase activity, coupled to transmembrane movement of substances	K05643//ABC transporters
Abca5	ENSMUSG00000018800		-0.389765	2.22e-08	1.55e-07		-0.352823	1.1e-06	1.63e-05		GO:0005770//late endosome;GO:0005765//lysosomal membrane;GO:0031902//late endosome membrane;GO:0005794//Golgi apparatus;GO:0016021//integral component of membrane;GO:0005768//endosome;GO:0005764//lysosome;GO:0000139//Golgi membrane;GO:0016020//membrane	GO:0043691//reverse cholesterol transport;GO:0055085//transmembrane transport;GO:0034375//high-density lipoprotein particle remodeling;GO:0010745//negative regulation of macrophage derived foam cell differentiation;GO:0033344//cholesterol efflux;GO:0006810//transport	GO:0042626//ATPase activity, coupled to transmembrane movement of substances;GO:0000166//nucleotide binding;GO:0005524//ATP binding;GO:0016887//ATPase activity	K05648//ABC transporters
Ablim1	ENSMUSG00000025085		-0.276035	6.96e-05	0.000308146		-0.334528	1.49e-06	2.12e-05		GO:0030027//lamellipodium;GO:0014069//postsynaptic density;GO:0001725//stress fiber;GO:0015629//actin cytoskeleton;GO:0005737//cytoplasm;GO:0005856//cytoskeleton	GO:0007411//axon guidance;GO:0007010//cytoskeleton organization;GO:0030032//lamellipodium assembly;GO:0045944//positive regulation of transcription from RNA polymerase II promoter;GO:0060271//cilium assembly	GO:0046872//metal ion binding;GO:0003779//actin binding;GO:0005515//protein binding	K07520//Axon guidance
Acadvl	ENSMUSG00000018574		-0.279715	0.00352936	0.0111248		-0.207764	0.00693315	0.0303118		GO:0005739//mitochondrion;GO:0005730//nucleolus;GO:0005743//mitochondrial inner membrane;GO:0042645//mitochondrial nucleoid;GO:0031966//mitochondrial membrane;GO:0016020//membrane;GO:0005829//cytosol;GO:0005634//nucleus	GO:0006631//fatty acid metabolic process;GO:0033539//fatty acid beta-oxidation using acyl-CoA dehydrogenase;GO:0006629//lipid metabolic process;GO:0009409//response to cold;GO:0008152//metabolic process;GO:0055114//oxidation-reduction process;GO:0090181//regulation of cholesterol metabolic process;GO:0030855//epithelial cell differentiation;GO:0001659//temperature homeostasis;GO:0009062//fatty ac…	GO:0003995//acyl-CoA dehydrogenase activity;GO:0050660//flavin adenine dinucleotide binding;GO:0016491//oxidoreductase activity;GO:0016627//oxidoreductase activity, acting on the CH-CH group of donors;GO:0004466//long-chain-acyl-CoA dehydrogenase activity	K09479//Fatty acid metabolism;Metabolic pathways;Fatty acid degradation
Acat3	ENSMUSG00000062480		-0.870432	3.03e-13	3.27e-12		-0.966886	1.03e-08	2.38e-07		GO:0005739//mitochondrion;GO:0005730//nucleolus;GO:0070062//extracellular exosome;GO:0005737//cytoplasm;GO:0005829//cytosol;GO:0005634//nucleus	GO:0006635//fatty acid beta-oxidation;GO:0008152//metabolic process	GO:0003985//acetyl-CoA C-acetyltransferase activity;GO:0003824//catalytic activity;GO:0016746//transferase activity, transferring acyl groups;GO:0016740//transferase activity;GO:0016747//transferase activity, transferring acyl groups other than amino-acyl groups	-
Acot2	ENSMUSG00000021226		-0.710185	2.28e-08	1.59e-07		-0.414546	0.00460402	0.0217047		GO:0005739//mitochondrion;GO:0070062//extracellular exosome;GO:0005759//mitochondrial matrix	GO:0006637//acyl-CoA metabolic process;GO:0000038//very long-chain fatty acid metabolic process;GO:0006631//fatty acid metabolic process;GO:0001676//long-chain fatty acid metabolic process	GO:0016290//palmitoyl-CoA hydrolase activity;GO:0047617//acyl-CoA hydrolase activity;GO:0005102//receptor binding;GO:0016790//thiolester hydrolase activity;GO:0052689//carboxylic ester hydrolase activity;GO:0016787//hydrolase activity;GO:0102991//myristoyl-CoA hydrolase activity	K01068//Metabolic pathways;Fatty acid elongation;Biosynthesis of unsaturated fatty acids;Biosynthesis of secondary metabolites
Adam15	ENSMUSG00000028041		-0.3539	2.18e-10	1.87e-09		-0.145548	0.00967921	0.0396984		GO:0005912//adherens junction;GO:0012505//endomembrane system;GO:0016020//membrane;GO:0031410//cytoplasmic vesicle;GO:0070062//extracellular exosome;GO:0016021//integral component of membrane;GO:0005615//extracellular space;GO:0009986//cell surface;GO:0042995//cell projection;GO:0030054//cell junction;GO:0001669//acrosomal vesicle	GO:0060317//cardiac epithelial to mesenchymal transition;GO:0030574//collagen catabolic process;GO:0007155//cell adhesion;GO:0042246//tissue regeneration;GO:0008584//male gonad development;GO:1900121//negative regulation of receptor binding;GO:0001525//angiogenesis;GO:0030336//negative regulation of cell migration;GO:0070528//protein kinase C signaling;GO:0045087//innate immune response;GO:000722…	GO:0017124//SH3 domain binding;GO:0005515//protein binding;GO:0005178//integrin binding;GO:0016787//hydrolase activity;GO:0008237//metallopeptidase activity;GO:0004222//metalloendopeptidase activity;GO:0008233//peptidase activity;GO:0046872//metal ion binding	K05719//Leishmaniasis;Proteoglycans in cancer;Bacterial invasion of epithelial cells;Arrhythmogenic right ventricular cardiomyopathy (ARVC);Cell adhesion molecules (CAMs);Pertussis;PI3K-Akt signaling pathway;ECM-receptor interaction;Phagosome;Platelet activation;Leukocyte transendothelial migration;Hypertrophic cardiomyopathy (HCM);Regulation of actin cytoskeleton;Pathogenic Escherichia coli infe…
Adamtsl1	ENSMUSG00000066113		-2.34569	8.5e-168	1.66e-165		-0.797821	6.51e-09	1.55e-07		GO:0005578//proteinaceous extracellular matrix;GO:0005576//extracellular region	GO:0006508//proteolysis	GO:0004222//metalloendopeptidase activity;GO:0008270//zinc ion binding;GO:0008233//peptidase activity	-
Adamtsl4	ENSMUSG00000015850		-0.592051	0.00235914	0.00779457		-0.699476	0.00173861	0.00977426		GO:0005615//extracellular space;GO:0005578//proteinaceous extracellular matrix;GO:0005576//extracellular region;GO:0005614//interstitial matrix	GO:0006915//apoptotic process;GO:0043065//positive regulation of apoptotic process;GO:0002064//epithelial cell development;GO:0030198//extracellular matrix organization;GO:0006508//proteolysis	GO:0008233//peptidase activity;GO:0002020//protease binding	-
Adra1d	ENSMUSG00000027335		-0.668366	3.79e-06	2.05e-05		-0.523596	0.000836854	0.0053344		GO:0016020//membrane;GO:0005886//plasma membrane;GO:0016021//integral component of membrane	GO:0007186//G-protein coupled receptor signaling pathway;GO:0071875//adrenergic receptor signaling pathway;GO:0007165//signal transduction	GO:0004935//adrenergic receptor activity;GO:0004930//G-protein coupled receptor activity;GO:0004937//alpha1-adrenergic receptor activity;GO:0004871//signal transducer activity	K04137//Neuroactive ligand-receptor interaction;Calcium signaling pathway;cGMP-PKG signaling pathway;Adrenergic signaling in cardiomyocytes;Vascular smooth muscle contraction;Salivary secretion
Afap1l2	ENSMUSG00000025083		-0.787787	1.54e-12	1.56e-11		-0.527716	3.16e-05	0.000321614		GO:0005829//cytosol;GO:0005886//plasma membrane;GO:0005737//cytoplasm	GO:0009967//positive regulation of signal transduction;GO:0032757//positive regulation of interleukin-8 production;GO:0045893//positive regulation of transcription, DNA-templated;GO:0045742//positive regulation of epidermal growth factor receptor signaling pathway;GO:0009966//regulation of signal transduction;GO:0007346//regulation of mitotic cell cycle;GO:0032675//regulation of interleukin-6 pro…	GO:0017124//SH3 domain binding;GO:0030296//protein tyrosine kinase activator activity;GO:0042169//SH2 domain binding;GO:0035591//signaling adaptor activity	-
Aff3	ENSMUSG00000037138		-0.171228	0.00128697	0.00449994		-0.369437	1.43e-14	7.77e-13		GO:0005634//nucleus;GO:0005829//cytosol;GO:0016604//nuclear body;GO:0005654//nucleoplasm	GO:0034612//response to tumor necrosis factor;GO:0035116//embryonic hindlimb morphogenesis	GO:0003690//double-stranded DNA binding	-
Agbl5	ENSMUSG00000029165		-0.538567	0.00317157	0.0101237		-0.491367	0.0125499	0.0488752		GO:0005819//spindle;GO:0030496//midbody;GO:0005829//cytosol;GO:0005634//nucleus;GO:0005737//cytoplasm;GO:0005856//cytoskeleton;GO:0072686//mitotic spindle	GO:0035610//protein side chain deglutamylation;GO:0035608//protein deglutamylation;GO:0051607//defense response to virus;GO:0035611//protein branching point deglutamylation;GO:0006508//proteolysis	GO:0008233//peptidase activity;GO:0046872//metal ion binding;GO:0008270//zinc ion binding;GO:0015631//tubulin binding;GO:0004181//metallocarboxypeptidase activity;GO:0004180//carboxypeptidase activity;GO:0016787//hydrolase activity;GO:0008237//metallopeptidase activity	-
AI464131	ENSMUSG00000046312		-0.431497	4.76e-06	2.55e-05		-0.352526	0.00103406	0.00637151		GO:0005783//endoplasmic reticulum;GO:0005634//nucleus;GO:0016020//membrane;GO:0016021//integral component of membrane;GO:0005789//endoplasmic reticulum membrane;GO:0031965//nuclear membrane	GO:0051897//positive regulation of protein kinase B signaling;GO:0048741//skeletal muscle fiber development;GO:0005975//carbohydrate metabolic process;GO:0043568//positive regulation of insulin-like growth factor receptor signaling pathway;GO:0008152//metabolic process	GO:0016787//hydrolase activity;GO:0016798//hydrolase activity, acting on glycosyl bonds;GO:0004553//hydrolase activity, hydrolyzing O-glycosyl compounds;GO:0005515//protein binding	-
AI597479	ENSMUSG00000010290		-0.452447	7.91e-10	6.44e-09		-0.273899	0.000206084	0.00161252		GO:0072669//tRNA-splicing ligase complex	GO:0048598//embryonic morphogenesis	-	-
Ajuba	ENSMUSG00000022178		-0.705848	4.54e-23	8.45e-22		-0.471683	1.25e-13	6.05e-12		GO:0005925//focal adhesion;GO:0005911//cell-cell junction;GO:0005794//Golgi apparatus;GO:0005737//cytoplasm;GO:0030054//cell junction;GO:0030027//lamellipodium;GO:0005654//nucleoplasm;GO:0005667//transcription factor complex;GO:0000932//P-body;GO:0005856//cytoskeleton;GO:0005634//nucleus;GO:0005886//plasma membrane;GO:0005829//cytosol;GO:0005815//microtubule organizing center;GO:0016020//membrane	GO:0001666//response to hypoxia;GO:0033673//negative regulation of kinase activity;GO:0043406//positive regulation of MAP kinase activity;GO:0031334//positive regulation of protein complex assembly;GO:0031047//gene silencing by RNA;GO:0007049//cell cycle;GO:0007010//cytoskeleton organization;GO:0031328//positive regulation of cellular biosynthetic process;GO:2000637//positive regulation of gene s…	GO:0003682//chromatin binding;GO:0046872//metal ion binding;GO:0045294//alpha-catenin binding;GO:0005515//protein binding;GO:0051015//actin filament binding;GO:0003714//transcription corepressor activity	K16682//Hippo signaling pathway;Hippo signaling pathway - fly
Akap8l	ENSMUSG00000002625		-0.216448	0.00110234	0.00391309		-0.400694	1.19e-11	4.5e-10		GO:0000785//chromatin;GO:0030529//intracellular ribonucleoprotein complex;GO:0016607//nuclear speck;GO:0005737//cytoplasm;GO:0005634//nucleus;GO:0016363//nuclear matrix	GO:0051081//nuclear envelope disassembly;GO:0033127//regulation of histone phosphorylation;GO:0031065//positive regulation of histone deacetylation;GO:0007076//mitotic chromosome condensation;GO:0044839//cell cycle G2/M phase transition;GO:0045944//positive regulation of transcription from RNA polymerase II promoter;GO:0010793//regulation of mRNA export from nucleus;GO:0006397//mRNA processing;GO…	GO:0003677//DNA binding;GO:0042826//histone deacetylase binding;GO:0003723//RNA binding;GO:0005521//lamin binding;GO:0016301//kinase activity	K15978//Epstein-Barr virus infection
Akt1s1	ENSMUSG00000011096		-0.310636	5.95e-06	3.14e-05		-0.241662	3.28e-06	4.3e-05		GO:0031931//TORC1 complex;GO:0043234//protein complex;GO:0005737//cytoplasm;GO:0005829//cytosol;GO:0005634//nucleus	GO:0038202//TORC1 signaling;GO:0006469//negative regulation of protein kinase activity;GO:0043523//regulation of neuron apoptotic process;GO:0042981//regulation of apoptotic process;GO:0048011//neurotrophin TRK receptor signaling pathway;GO:0007219//Notch signaling pathway;GO:0032007//negative regulation of TOR signaling;GO:0045792//negative regulation of cell size	-	K16184//mTOR signaling pathway;AMPK signaling pathway
Aktip	ENSMUSG00000031667		-0.717993	2.8e-25	5.68e-24		-0.327328	6.8e-06	8.26e-05		GO:0070695//FHF complex;GO:0030897//HOPS complex;GO:0005737//cytoplasm;GO:0005886//plasma membrane;GO:0005829//cytosol;GO:0016020//membrane	GO:0008333//endosome to lysosome transport;GO:0015031//protein transport;GO:0032092//positive regulation of protein binding;GO:0007032//endosome organization;GO:0045022//early endosome to late endosome transport;GO:0007040//lysosome organization;GO:0016567//protein ubiquitination;GO:0001934//positive regulation of protein phosphorylation;GO:0006915//apoptotic process;GO:0006810//transport	GO:0061630//ubiquitin protein ligase activity;GO:0031625//ubiquitin protein ligase binding	-
Aldh1l2	ENSMUSG00000020256		-0.472624	1.35e-12	1.38e-11		-0.213844	0.000288427	0.0021491		GO:0070062//extracellular exosome;GO:0005739//mitochondrion;GO:0005737//cytoplasm	GO:0008152//metabolic process;GO:0009058//biosynthetic process;GO:0055114//oxidation-reduction process;GO:0009258//10-formyltetrahydrofolate catabolic process;GO:0006730//one-carbon metabolic process	GO:0003824//catalytic activity;GO:0016491//oxidoreductase activity;GO:0004029//aldehyde dehydrogenase (NAD) activity;GO:0016155//formyltetrahydrofolate dehydrogenase activity;GO:0016742//hydroxymethyl-, formyl- and related transferase activity	K00289//One carbon pool by folate
Alkal1	ENSMUSG00000087247		-1.71886	3.17e-11	2.92e-10		-1.01817	0.0107491	0.043145		GO:0005576//extracellular region	GO:0010976//positive regulation of neuron projection development;GO:0070374//positive regulation of ERK1 and ERK2 cascade;GO:0070378//positive regulation of ERK5 cascade;GO:0061098//positive regulation of protein tyrosine kinase activity	GO:0030971//receptor tyrosine kinase binding;GO:0030298//receptor signaling protein tyrosine kinase activator activity	-
Anxa6	ENSMUSG00000018340		-0.437399	1.09e-12	1.13e-11		-0.221348	1.27e-05	0.000144308		GO:0005829//cytosol;GO:0016020//membrane;GO:0048471//perinuclear region of cytoplasm;GO:0005737//cytoplasm;GO:0042470//melanosome;GO:0005765//lysosomal membrane;GO:0005925//focal adhesion;GO:0070062//extracellular exosome;GO:0005739//mitochondrion;GO:0031902//late endosome membrane	GO:0097190//apoptotic signaling pathway;GO:0006937//regulation of muscle contraction;GO:0006816//calcium ion transport;GO:0051560//mitochondrial calcium ion homeostasis;GO:0034220//ion transmembrane transport;GO:0051260//protein homooligomerization	GO:0015276//ligand-gated ion channel activity;GO:0008289//lipid binding;GO:0015485//cholesterol binding;GO:0048306//calcium-dependent protein binding;GO:0005544//calcium-dependent phospholipid binding;GO:0005509//calcium ion binding;GO:0042803//protein homodimerization activity;GO:0005525//GTP binding	-
Ap3m2	ENSMUSG00000031539		-0.874503	5.09e-24	9.9e-23		-0.469154	2.98e-06	3.94e-05		GO:0005794//Golgi apparatus;GO:0031410//cytoplasmic vesicle;GO:0030131//clathrin adaptor complex;GO:0016020//membrane;GO:1904115//axon cytoplasm;GO:0030659//cytoplasmic vesicle membrane	GO:0016192//vesicle-mediated transport;GO:0006810//transport;GO:0048490//anterograde synaptic vesicle transport;GO:0008089//anterograde axonal transport;GO:0006886//intracellular protein transport;GO:0015031//protein transport	-	K12398//Lysosome
Apc2	ENSMUSG00000020135		-1.01834	4.66e-14	5.35e-13		-0.5036	0.00152693	0.00876637		GO:0031941//filamentous actin;GO:0005881//cytoplasmic microtubule;GO:0005737//cytoplasm;GO:0015630//microtubule cytoskeleton;GO:0048471//perinuclear region of cytoplasm;GO:0005794//Golgi apparatus;GO:0031258//lamellipodium membrane;GO:0005884//actin filament;GO:0016342//catenin complex	GO:0016055//Wnt signaling pathway;GO:0030178//negative regulation of Wnt signaling pathway;GO:0090090//negative regulation of canonical Wnt signaling pathway;GO:0090630//activation of GTPase activity;GO:0000226//microtubule cytoskeleton organization;GO:0035414//negative regulation of catenin import into nucleus	GO:0008017//microtubule binding;GO:0008013//beta-catenin binding	K02085//Hippo signaling pathway;Basal cell carcinoma;Regulation of actin cytoskeleton;HTLV-I infection;Wnt signaling pathway;Colorectal cancer;MicroRNAs in cancer;Pathways in cancer;Endometrial cancer;Signaling pathways regulating pluripotency of stem cells
Apcdd1	ENSMUSG00000071847		-2.2068	0	0		-0.293504	1.96e-05	0.000212662		GO:0005887//integral component of plasma membrane;GO:0016021//integral component of membrane;GO:0005886//plasma membrane;GO:0016020//membrane	GO:0043615//astrocyte cell migration;GO:0016055//Wnt signaling pathway;GO:0001942//hair follicle development;GO:0030178//negative regulation of Wnt signaling pathway	GO:0042802//identical protein binding;GO:0017147//Wnt-protein binding	-
Araf	ENSMUSG00000001127		-0.222862	0.000108285	0.000463823		-0.176782	0.00129428	0.00768052		GO:0005829//cytosol;GO:0005739//mitochondrion	GO:0016310//phosphorylation;GO:0007275//multicellular organism development;GO:0030154//cell differentiation;GO:0000186//activation of MAPKK activity;GO:0070374//positive regulation of ERK1 and ERK2 cascade;GO:0035556//intracellular signal transduction;GO:0007165//signal transduction;GO:0000165//MAPK cascade;GO:0032006//regulation of TOR signaling;GO:0009968//negative regulation of signal transduc…	GO:0046872//metal ion binding;GO:0005057//signal transducer activity, downstream of receptor;GO:0004709//MAP kinase kinase kinase activity;GO:0004672//protein kinase activity;GO:0016301//kinase activity;GO:0000166//nucleotide binding;GO:0031434//mitogen-activated protein kinase kinase binding;GO:0004674//protein serine/threonine kinase activity;GO:0005515//protein binding;GO:0005524//ATP binding;…	K08845//ErbB signaling pathway;Regulation of actin cytoskeleton;Acute myeloid leukemia;Melanoma;Alcoholism;Non-small cell lung cancer;Endometrial cancer;Pathways in cancer;Glioma;Natural killer cell mediated cytotoxicity;Long-term depression;Hepatitis C;Pancreatic cancer;Prostate cancer;Progesterone-mediated oocyte maturation;Bladder cancer;FoxO signaling pathway;Renal cell carcinoma;Long-term po…
Arhgap23	ENSMUSG00000049807		-0.514524	1.38e-15	1.75e-14		-0.186422	0.00479742	0.0224664		GO:0070062//extracellular exosome	GO:0007165//signal transduction;GO:0043547//positive regulation of GTPase activity	GO:0005096//GTPase activator activity	-
Arid5b	ENSMUSG00000019947		-0.738506	3.78e-19	5.8e-18		-0.165513	0.00831792	0.0350414		GO:0005634//nucleus	GO:0010761//fibroblast migration;GO:0006807//nitrogen compound metabolic process;GO:0048644//muscle organ morphogenesis;GO:0060613//fat pad development;GO:0045444//fat cell differentiation;GO:0006357//regulation of transcription from RNA polymerase II promoter;GO:0006351//transcription, DNA-templated;GO:0060612//adipose tissue development;GO:0051091//positive regulation of sequence-specific DNA b…	GO:0000977//RNA polymerase II regulatory region sequence-specific DNA binding;GO:0003677//DNA binding;GO:0044212//transcription regulatory region DNA binding;GO:0003713//transcription coactivator activity;GO:0001227//transcriptional repressor activity, RNA polymerase II transcription regulatory region sequence-specific binding	-
Armcx1	ENSMUSG00000033460		-1.17008	4.36e-50	1.88e-48		-0.295435	0.00318739	0.0160866		GO:0016020//membrane;GO:0016021//integral component of membrane;GO:0005741//mitochondrial outer membrane;GO:0005739//mitochondrion	-	-	-
Arrdc1	ENSMUSG00000026972		-0.532964	4.45e-06	2.38e-05		-0.546376	8.1e-05	0.000727753		GO:0070062//extracellular exosome;GO:0031410//cytoplasmic vesicle;GO:0005886//plasma membrane;GO:0016020//membrane;GO:1903561//extracellular vesicle	GO:0006858//extracellular transport;GO:0045746//negative regulation of Notch signaling pathway;GO:0006511//ubiquitin-dependent protein catabolic process;GO:0015031//protein transport;GO:0008104//protein localization;GO:0016567//protein ubiquitination	GO:1990756//protein binding, bridging involved in substrate recognition for ubiquitination;GO:1990763//arrestin family protein binding;GO:0042802//identical protein binding;GO:0031625//ubiquitin protein ligase binding	-
Asap3	ENSMUSG00000036995		-1.2486	1.03e-20	1.7e-19		-0.738515	4.77e-05	0.000461724		GO:0005829//cytosol;GO:0043231//intracellular membrane-bounded organelle;GO:0005737//cytoplasm;GO:0001726//ruffle;GO:0005654//nucleoplasm;GO:0005925//focal adhesion	GO:0051492//regulation of stress fiber assembly;GO:0043547//positive regulation of GTPase activity;GO:0016477//cell migration	GO:0046872//metal ion binding;GO:0005096//GTPase activator activity	K12488//Fc gamma R-mediated phagocytosis;Endocytosis
Atf3	ENSMUSG00000026628		-0.459854	0.015708	0.0415751		-0.769256	1.86e-05	0.000202562		GO:1990622//CHOP-ATF3 complex;GO:0005730//nucleolus;GO:0005634//nucleus	GO:0000122//negative regulation of transcription from RNA polymerase II promoter;GO:0008284//positive regulation of cell proliferation;GO:0006094//gluconeogenesis;GO:0045892//negative regulation of transcription, DNA-templated;GO:1903984//positive regulation of TRAIL-activated apoptotic signaling pathway;GO:0070373//negative regulation of ERK1 and ERK2 cascade;GO:0045944//positive regulation of t…	GO:0003700//transcription factor activity, sequence-specific DNA binding;GO:0042803//protein homodimerization activity;GO:0042802//identical protein binding;GO:0003677//DNA binding;GO:0044212//transcription regulatory region DNA binding;GO:0000977//RNA polymerase II regulatory region sequence-specific DNA binding;GO:0001078//transcriptional repressor activity, RNA polymerase II core promoter prox…	K09032//HTLV-I infection
Atf5	ENSMUSG00000038539		-0.321216	0.000843106	0.00306624		-0.225	0.00123852	0.00739289		GO:0005667//transcription factor complex;GO:0005654//nucleoplasm;GO:0005813//centrosome;GO:0005634//nucleus;GO:0005829//cytosol;GO:0005815//microtubule organizing center;GO:0005856//cytoskeleton;GO:0005737//cytoplasm	GO:0021988//olfactory lobe development;GO:0009791//post-embryonic development;GO:0045892//negative regulation of transcription, DNA-templated;GO:0045893//positive regulation of transcription, DNA-templated;GO:0045944//positive regulation of transcription from RNA polymerase II promoter;GO:0008285//negative regulation of cell proliferation;GO:0046605//regulation of centrosome cycle;GO:0035264//mul…	GO:0015631//tubulin binding;GO:0005515//protein binding;GO:0003677//DNA binding;GO:0044212//transcription regulatory region DNA binding;GO:0003700//transcription factor activity, sequence-specific DNA binding;GO:0043565//sequence-specific DNA binding;GO:0019900//kinase binding;GO:0000977//RNA polymerase II regulatory region sequence-specific DNA binding;GO:0003682//chromatin binding	-
Atl1	ENSMUSG00000021066		-0.425867	0.00165991	0.00567119		-0.66646	1.71e-05	0.000187924		GO:0005794//Golgi apparatus;GO:0030424//axon;GO:0071782//endoplasmic reticulum tubular network;GO:0098826//endoplasmic reticulum tubular network membrane;GO:0042995//cell projection;GO:0005783//endoplasmic reticulum;GO:0005737//cytoplasm;GO:0005789//endoplasmic reticulum membrane;GO:0016021//integral component of membrane;GO:0000139//Golgi membrane;GO:0016020//membrane;GO:0000137//Golgi cis ciste…	GO:0007409//axonogenesis;GO:1990809//endoplasmic reticulum tubular network membrane organization;GO:0007029//endoplasmic reticulum organization;GO:0051260//protein homooligomerization	GO:0000166//nucleotide binding;GO:0042802//identical protein binding;GO:0005515//protein binding;GO:0016787//hydrolase activity;GO:0005525//GTP binding;GO:0003924//GTPase activity	-
AW011738	ENSMUSG00000078349		-1.02373	4.57e-13	4.86e-12		-0.876132	1.74e-06	2.45e-05		-	-	-	-
B4gat1	ENSMUSG00000047379		-0.215742	0.00183371	0.0062014		-0.225195	0.00032932	0.00239855		GO:0016020//membrane;GO:0016021//integral component of membrane;GO:0070062//extracellular exosome;GO:0005794//Golgi apparatus;GO:0000139//Golgi membrane	GO:0007411//axon guidance;GO:0006486//protein glycosylation;GO:0035269//protein O-linked mannosylation	GO:0046872//metal ion binding;GO:0016740//transferase activity;GO:0015020//glucuronosyltransferase activity;GO:0016757//transferase activity, transferring glycosyl groups	K00741//Glycosaminoglycan biosynthesis - keratan sulfate;Metabolic pathways;Glycosphingolipid biosynthesis - lacto and neolacto series
B9d1	ENSMUSG00000001039		-0.781873	7.33e-08	4.88e-07		-0.397999	0.0108001	0.0433285		GO:0005929//cilium;GO:0005813//centrosome;GO:0036064//ciliary basal body;GO:0016020//membrane;GO:0005856//cytoskeleton;GO:0036038//MKS complex;GO:0042995//cell projection;GO:0035869//ciliary transition zone;GO:0005737//cytoplasm	GO:0007224//smoothened signaling pathway;GO:0060271//cilium assembly;GO:0001944//vasculature development;GO:0032880//regulation of protein localization;GO:0042733//embryonic digit morphogenesis;GO:0001701//in utero embryonic development;GO:0043010//camera-type eye development;GO:0030030//cell projection organization;GO:0060563//neuroepithelial cell differentiation	GO:0008158//hedgehog receptor activity;GO:0005515//protein binding	-
Babam2	ENSMUSG00000052139		-0.183839	0.0036311	0.0114081		-0.246009	9.12e-05	0.000806705		GO:0005737//cytoplasm;GO:0070531//BRCA1-A complex;GO:0070552//BRISC complex;GO:0000152//nuclear ubiquitin ligase complex;GO:0005634//nucleus;GO:0005829//cytosol	GO:0007049//cell cycle;GO:0031572//G2 DNA damage checkpoint;GO:0045739//positive regulation of DNA repair;GO:0006974//cellular response to DNA damage stimulus;GO:0006281//DNA repair;GO:0016569//covalent chromatin modification;GO:0006302//double-strand break repair;GO:0010212//response to ionizing radiation;GO:0043066//negative regulation of apoptotic process;GO:0006915//apoptotic process;GO:00513…	GO:0031593//polyubiquitin modification-dependent protein binding;GO:0005164//tumor necrosis factor receptor binding	-
Bicdl1	ENSMUSG00000041609		-0.494569	0.00241777	0.00796763		-0.446792	0.00617941	0.027616		GO:0016020//membrane;GO:0005815//microtubule organizing center;GO:0005737//cytoplasm;GO:0005856//cytoskeleton;GO:0016021//integral component of membrane;GO:0005813//centrosome	GO:0055107//Golgi to secretory granule transport;GO:0007399//nervous system development;GO:0031175//neuron projection development;GO:0006810//transport	GO:0005515//protein binding;GO:0034452//dynactin binding;GO:0017137//Rab GTPase binding	-
Bloc1s5	ENSMUSG00000038982		-0.424514	1.17e-05	5.86e-05		-0.26129	0.00583774	0.0263359		GO:0030133//transport vesicle;GO:0043231//intracellular membrane-bounded organelle;GO:1904115//axon cytoplasm;GO:0031083//BLOC-1 complex	GO:0048490//anterograde synaptic vesicle transport;GO:0016192//vesicle-mediated transport;GO:0031175//neuron projection development;GO:0050942//positive regulation of pigment cell differentiation;GO:0032402//melanosome transport;GO:0032474//otolith morphogenesis;GO:0008089//anterograde axonal transport;GO:0016197//endosomal transport;GO:0035646//endosome to melanosome transport;GO:0048066//develo…	GO:0005515//protein binding	-
Bnc2	ENSMUSG00000028487		-0.304225	0.000282889	0.00112827		-0.156583	0.008915	0.0370663		GO:0005634//nucleus;GO:0005886//plasma membrane;GO:0005829//cytosol	GO:0060485//mesenchyme development;GO:0006355//regulation of transcription, DNA-templated;GO:0003416//endochondral bone growth;GO:0006351//transcription, DNA-templated;GO:0060021//palate development;GO:0043586//tongue development	GO:0008270//zinc ion binding;GO:0003676//nucleic acid binding;GO:0003677//DNA binding;GO:0046872//metal ion binding	-
Bsdc1	ENSMUSG00000040859		-0.173141	0.0103258	0.028847		-0.278741	5.3e-05	0.00050611		-	-	-	-
Bsg	ENSMUSG00000023175		-0.393452	8.12e-08	5.38e-07		-0.13832	0.00904738	0.0375169		GO:0042383//sarcolemma;GO:0016021//integral component of membrane;GO:0043231//intracellular membrane-bounded organelle;GO:0045121//membrane raft;GO:0070062//extracellular exosome;GO:0005739//mitochondrion;GO:0005887//integral component of plasma membrane;GO:0005925//focal adhesion;GO:0042470//melanosome;GO:0005886//plasma membrane;GO:0016020//membrane;GO:0002080//acrosomal membrane	GO:0051591//response to cAMP;GO:0042475//odontogenesis of dentin-containing tooth;GO:0072659//protein localization to plasma membrane;GO:0007566//embryo implantation;GO:0046697//decidualization;GO:0046689//response to mercury ion;GO:0043434//response to peptide hormone	GO:0030246//carbohydrate binding;GO:0045296//cadherin binding;GO:0005537//mannose binding	-
C1rl	ENSMUSG00000038527		-0.314829	2.01e-05	9.72e-05		-0.344136	1.77e-05	0.000193917		GO:0070062//extracellular exosome;GO:0005576//extracellular region;GO:0005615//extracellular space	GO:0006958//complement activation, classical pathway;GO:0002376//immune system process;GO:0045087//innate immune response;GO:0006508//proteolysis	GO:0004252//serine-type endopeptidase activity;GO:0008236//serine-type peptidase activity;GO:0008233//peptidase activity;GO:0016787//hydrolase activity	-
Cacnb1	ENSMUSG00000020882		-0.498565	0.0017627	0.00598744		-0.579811	0.00189027	0.0104496		GO:0005886//plasma membrane;GO:0016529//sarcoplasmic reticulum;GO:0016020//membrane;GO:0042383//sarcolemma;GO:0030315//T-tubule;GO:0005891//voltage-gated calcium channel complex	GO:0070588//calcium ion transmembrane transport;GO:0034765//regulation of ion transmembrane transport;GO:1902514//regulation of calcium ion transmembrane transport via high voltage-gated calcium channel;GO:1904646//cellular response to amyloid-beta;GO:0006811//ion transport;GO:0007528//neuromuscular junction development;GO:0006816//calcium ion transport;GO:0006612//protein targeting to membrane;G…	GO:0005245//voltage-gated calcium channel activity;GO:0005244//voltage-gated ion channel activity;GO:0008331//high voltage-gated calcium channel activity;GO:0005515//protein binding;GO:0005262//calcium channel activity	K04862//Hypertrophic cardiomyopathy (HCM);Cardiac muscle contraction;Dilated cardiomyopathy;MAPK signaling pathway;Arrhythmogenic right ventricular cardiomyopathy (ARVC);Oxytocin signaling pathway;Adrenergic signaling in cardiomyocytes
Cage1	ENSMUSG00000044566		-0.539358	0.000616046	0.00230231		-0.55315	0.00420856	0.0202041		-	-	-	-
Carmn	ENSMUSG00000097324		-0.576665	8.86e-05	0.000385596		-0.360508	0.00448234	0.0212793		-	-	-	-
Cavin3	ENSMUSG00000037060		-0.452635	3.1e-05	0.000145401		-0.396453	7.54e-10	2.15e-08		GO:0043234//protein complex;GO:0005901//caveola;GO:0005737//cytoplasm;GO:0005829//cytosol;GO:0016020//membrane	GO:0051898//negative regulation of protein kinase B signaling;GO:0070374//positive regulation of ERK1 and ERK2 cascade;GO:0030866//cortical actin cytoskeleton organization;GO:0032922//circadian regulation of gene expression;GO:0048511//rhythmic process;GO:1901003//negative regulation of fermentation	GO:0005080//protein kinase C binding;GO:0005515//protein binding	-
Ccdc39	ENSMUSG00000027676		-0.724601	0.00023185	0.000940117		-0.859663	0.000211392	0.00164612		GO:0005930//axoneme;GO:0005929//cilium;GO:0042995//cell projection;GO:0005737//cytoplasm;GO:0005856//cytoskeleton	GO:0007507//heart development;GO:0030317//flagellated sperm motility;GO:0003356//regulation of cilium beat frequency;GO:0071907//determination of digestive tract left/right asymmetry;GO:0003341//cilium movement;GO:0060287//epithelial cilium movement involved in determination of left/right asymmetry;GO:0007368//determination of left/right symmetry;GO:0071910//determination of liver left/right asym…	-	-
Ccdc80	ENSMUSG00000022665		-1.03357	1.47e-64	8.62e-63		-0.247204	7.08e-07	1.11e-05		GO:0005614//interstitial matrix;GO:0005604//basement membrane;GO:0005576//extracellular region;GO:0005578//proteinaceous extracellular matrix;GO:0005615//extracellular space	GO:0030198//extracellular matrix organization;GO:0010811//positive regulation of cell-substrate adhesion	GO:0008201//heparin binding;GO:0001968//fibronectin binding;GO:0005539//glycosaminoglycan binding	-
Ccng2	ENSMUSG00000029385		-0.435823	2.64e-13	2.86e-12		-0.463016	8.54e-16	5.29e-14		GO:0005737//cytoplasm;GO:0005634//nucleus	GO:0007049//cell cycle;GO:0051301//cell division;GO:0051726//regulation of cell cycle	-	K10146//p53 signaling pathway;FoxO signaling pathway
Cdc23	ENSMUSG00000024370		-0.21439	0.00234205	0.00774758		-0.193039	0.000590288	0.00394724		GO:0005622//intracellular;GO:0005680//anaphase-promoting complex	GO:0070979//protein K11-linked ubiquitination;GO:0030071//regulation of mitotic metaphase/anaphase transition;GO:0007080//mitotic metaphase plate congression;GO:0000278//mitotic cell cycle;GO:0051301//cell division	-	K03355//Cell cycle;Ubiquitin mediated proteolysis;Meiosis - yeast;Oocyte meiosis;HTLV-I infection;Progesterone-mediated oocyte maturation;Cell cycle - yeast
Cep170b	ENSMUSG00000072825		-0.414097	2.21e-07	1.4e-06		-0.224634	0.00449474	0.0213071		GO:0005874//microtubule;GO:0005856//cytoskeleton;GO:0005737//cytoplasm	-	-	-
Cgrrf1	ENSMUSG00000055128		-0.396299	0.000187374	0.000770885		-0.251479	0.0039191	0.0189885		GO:0043231//intracellular membrane-bounded organelle;GO:0005783//endoplasmic reticulum;GO:0005634//nucleus;GO:0005654//nucleoplasm	GO:0007049//cell cycle;GO:0007050//cell cycle arrest	GO:0046872//metal ion binding	-
Cirbp	ENSMUSG00000045193		-0.826105	1.8e-51	7.97e-50		-0.437665	3.76e-08	7.76e-07		GO:0005730//nucleolus;GO:0005654//nucleoplasm;GO:0005634//nucleus;GO:0010494//cytoplasmic stress granule;GO:0005737//cytoplasm	GO:1902806//regulation of cell cycle G1/S phase transition;GO:0017148//negative regulation of translation;GO:0070417//cellular response to cold;GO:0009411//response to UV;GO:0030308//negative regulation of cell growth;GO:0045727//positive regulation of translation;GO:0034063//stress granule assembly;GO:0048255//mRNA stabilization;GO:0009409//response to cold	GO:0003676//nucleic acid binding;GO:0030371//translation repressor activity;GO:0070181//small ribosomal subunit rRNA binding;GO:0003723//RNA binding;GO:0008266//poly(U) RNA binding;GO:0003730//mRNA 3'-UTR binding	-
Clca3a2	ENSMUSG00000028262		-2.71912	4.33e-267	1.7e-264		-0.290424	0.00137641	0.00806606		GO:0005887//integral component of plasma membrane	GO:0043276//anoikis;GO:1902476//chloride transmembrane transport;GO:0097192//extrinsic apoptotic signaling pathway in absence of ligand;GO:0006508//proteolysis;GO:0006821//chloride transport	GO:0008237//metallopeptidase activity;GO:0005229//intracellular calcium activated chloride channel activity	K05028//Renin secretion;Pancreatic secretion
Clip1	ENSMUSG00000049550		-0.631683	2.66e-34	7.52e-33		-0.122127	0.0126279	0.049073		GO:0005635//nuclear envelope;GO:0042995//cell projection;GO:0005737//cytoplasm;GO:0015630//microtubule cytoskeleton;GO:0031410//cytoplasmic vesicle;GO:0016020//membrane;GO:0044354//macropinosome;GO:0030659//cytoplasmic vesicle membrane;GO:0005856//cytoskeleton;GO:0001726//ruffle;GO:0035371//microtubule plus-end;GO:0005874//microtubule;GO:0005881//cytoplasmic microtubule;GO:0005813//centrosome	GO:0031116//positive regulation of microtubule polymerization;GO:0044861//protein transport into plasma membrane raft;GO:0001578//microtubule bundle formation;GO:0006810//transport	GO:0051010//microtubule plus-end binding;GO:0046872//metal ion binding;GO:0008017//microtubule binding;GO:0008270//zinc ion binding;GO:0005515//protein binding;GO:0015631//tubulin binding;GO:0042802//identical protein binding	-
Clip4	ENSMUSG00000024059		-1.62913	1.05e-48	4.41e-47		-0.411928	0.00624332	0.0278556		GO:0043231//intracellular membrane-bounded organelle	-	-	-
Clstn1	ENSMUSG00000039953		-0.68517	1.56e-27	3.44e-26		-0.267083	4.16e-05	0.000410023		GO:0000139//Golgi membrane;GO:0005886//plasma membrane;GO:0005576//extracellular region;GO:0005794//Golgi apparatus;GO:0070062//extracellular exosome;GO:0042995//cell projection;GO:0005783//endoplasmic reticulum;GO:0016021//integral component of membrane;GO:0045202//synapse;GO:0014069//postsynaptic density;GO:0005634//nucleus;GO:0016020//membrane;GO:0030054//cell junction;GO:0045211//postsynaptic…	GO:0007156//homophilic cell adhesion via plasma membrane adhesion molecules;GO:0006874//cellular calcium ion homeostasis;GO:0007268//chemical synaptic transmission;GO:0051965//positive regulation of synapse assembly;GO:0050806//positive regulation of synaptic transmission;GO:0007155//cell adhesion;GO:0001558//regulation of cell growth	GO:0005509//calcium ion binding;GO:0001540//amyloid-beta binding;GO:0005515//protein binding;GO:0019894//kinesin binding;GO:0042988//X11-like protein binding	-
Col24a1	ENSMUSG00000028197		-1.6557	4.92e-76	3.64e-74		-0.372787	0.00280178	0.014478		GO:0005578//proteinaceous extracellular matrix;GO:0005576//extracellular region;GO:0005581//collagen trimer	GO:0002244//hematopoietic progenitor cell differentiation	GO:0005201//extracellular matrix structural constituent	K04520//Serotonergic synapse;Alzheimer's disease
Copg2	ENSMUSG00000025607		-0.162264	0.0125544	0.0341849		-0.340616	1.61e-08	3.58e-07		GO:0005737//cytoplasm;GO:0030126//COPI vesicle coat;GO:0031410//cytoplasmic vesicle;GO:0005794//Golgi apparatus;GO:0030117//membrane coat;GO:0016020//membrane;GO:0005829//cytosol;GO:0000139//Golgi membrane;GO:0030663//COPI-coated vesicle membrane	GO:0006886//intracellular protein transport;GO:0015031//protein transport;GO:0016192//vesicle-mediated transport;GO:0006810//transport;GO:0006891//intra-Golgi vesicle-mediated transport	GO:0005198//structural molecule activity	-
Cpeb3	ENSMUSG00000039652		-0.553761	9.36e-06	4.78e-05		-0.29865	0.00506405	0.0234713		GO:0005886//plasma membrane;GO:0097440//apical dendrite;GO:0005634//nucleus;GO:0043005//neuron projection;GO:0016020//membrane;GO:1990124//messenger ribonucleoprotein complex;GO:0014069//postsynaptic density;GO:0045202//synapse;GO:0042995//cell projection;GO:0030054//cell junction;GO:0045211//postsynaptic membrane;GO:0030425//dendrite;GO:0005737//cytoplasm;GO:0030014//CCR4-NOT complex	GO:0060999//positive regulation of dendritic spine development;GO:0017148//negative regulation of translation;GO:0006417//regulation of translation;GO:1900365//positive regulation of mRNA polyadenylation;GO:0048167//regulation of synaptic plasticity;GO:0050955//thermoception;GO:0060998//regulation of dendritic spine development;GO:0061158//3'-UTR-mediated mRNA destabilization;GO:0007616//long-ter…	GO:0003723//RNA binding;GO:0003730//mRNA 3'-UTR binding;GO:0045182//translation regulator activity;GO:0005515//protein binding;GO:0043022//ribosome binding;GO:0000900//translation repressor activity, nucleic acid binding;GO:0008135//translation factor activity, RNA binding;GO:0003676//nucleic acid binding;GO:0035925//mRNA 3'-UTR AU-rich region binding;GO:0035613//RNA stem-loop binding	K02602//Progesterone-mediated oocyte maturation;Oocyte meiosis;Dorso-ventral axis formation
Crim1	ENSMUSG00000024074		-1.13206	3.35e-60	1.79e-58		-0.32799	2.41e-09	6.26e-08		GO:0016021//integral component of membrane;GO:0005576//extracellular region;GO:0016020//membrane;GO:0070062//extracellular exosome	GO:0001558//regulation of cell growth;GO:0043086//negative regulation of catalytic activity;GO:0010951//negative regulation of endopeptidase activity	GO:0005520//insulin-like growth factor binding;GO:0004857//enzyme inhibitor activity;GO:0004867//serine-type endopeptidase inhibitor activity;GO:0030165//PDZ domain binding	-
Cryz	ENSMUSG00000028199		-0.349387	0.000117933	0.000502468		-0.303059	0.000435553	0.00304681		GO:0005737//cytoplasm;GO:0005829//cytosol;GO:0070062//extracellular exosome	GO:0055114//oxidation-reduction process;GO:0042178//xenobiotic catabolic process;GO:0051289//protein homotetramerization	GO:0003730//mRNA 3'-UTR binding;GO:0003723//RNA binding;GO:0050661//NADP binding;GO:0016491//oxidoreductase activity;GO:0070402//NADPH binding;GO:0003960//NADPH:quinone reductase activity;GO:0008270//zinc ion binding	-
Ctdsp2	ENSMUSG00000078429		-0.135015	0.00115681	0.0040904		-0.152356	0.00355171	0.0175382		GO:0005634//nucleus	GO:0016311//dephosphorylation;GO:2000134//negative regulation of G1/S transition of mitotic cell cycle;GO:0001933//negative regulation of protein phosphorylation;GO:0006470//protein dephosphorylation	GO:0016787//hydrolase activity;GO:0046872//metal ion binding;GO:0008420//CTD phosphatase activity;GO:0016791//phosphatase activity;GO:0004721//phosphoprotein phosphatase activity	-
Cxcl12	ENSMUSG00000061353		-0.466869	8.71e-17	1.18e-15		-0.368815	1.21e-14	6.61e-13		GO:0009897//external side of plasma membrane;GO:0070062//extracellular exosome;GO:0005615//extracellular space;GO:0005737//cytoplasm;GO:0005886//plasma membrane;GO:0005576//extracellular region	GO:0098609//cell-cell adhesion;GO:1902230//negative regulation of intrinsic apoptotic signaling pathway in response to DNA damage;GO:0050966//detection of mechanical stimulus involved in sensory perception of pain;GO:1990478//response to ultrasound;GO:0030334//regulation of cell migration;GO:2000406//positive regulation of T cell migration;GO:0050930//induction of positive chemotaxis;GO:0060326//…	GO:0045236//CXCR chemokine receptor binding;GO:0042379//chemokine receptor binding;GO:0008009//chemokine activity;GO:0005125//cytokine activity;GO:0042056//chemoattractant activity;GO:0008083//growth factor activity	K10031//Chemokine signaling pathway;Intestinal immune network for IgA production;Rheumatoid arthritis;NF-kappa B signaling pathway;Cytokine-cytokine receptor interaction;Leukocyte transendothelial migration;Pathways in cancer
Cyb5r3	ENSMUSG00000018042		-0.231806	0.00130703	0.00456125		-0.182169	5.24e-05	0.000500678		GO:0016020//membrane;GO:0005811//lipid droplet;GO:0005743//mitochondrial inner membrane;GO:0005783//endoplasmic reticulum;GO:0005789//endoplasmic reticulum membrane;GO:0005737//cytoplasm;GO:0005741//mitochondrial outer membrane;GO:0005739//mitochondrion;GO:0070062//extracellular exosome	GO:0055114//oxidation-reduction process;GO:0008202//steroid metabolic process;GO:0006694//steroid biosynthetic process;GO:0008203//cholesterol metabolic process;GO:0006695//cholesterol biosynthetic process;GO:0016126//sterol biosynthetic process;GO:0006629//lipid metabolic process	GO:0004128//cytochrome-b5 reductase activity, acting on NAD(P)H;GO:0043531//ADP binding;GO:0051287//NAD binding;GO:0050660//flavin adenine dinucleotide binding;GO:0005515//protein binding;GO:0016208//AMP binding;GO:0016491//oxidoreductase activity	K00326//Amino sugar and nucleotide sugar metabolism
Cyr61	ENSMUSG00000028195		-1.21994	2.01e-53	9.4e-52		-0.580983	2.21e-18	1.78e-16		GO:0031012//extracellular matrix;GO:0005615//extracellular space;GO:0005578//proteinaceous extracellular matrix;GO:0005576//extracellular region	GO:0044319//wound healing, spreading of cells;GO:0043280//positive regulation of cysteine-type endopeptidase activity involved in apoptotic process;GO:0002041//intussusceptive angiogenesis;GO:0001558//regulation of cell growth;GO:0098609//cell-cell adhesion;GO:0030198//extracellular matrix organization;GO:0061036//positive regulation of cartilage development;GO:0045597//positive regulation of cel…	GO:0050840//extracellular matrix binding;GO:0005520//insulin-like growth factor binding;GO:0005178//integrin binding;GO:0008201//heparin binding;GO:0019838//growth factor binding	K05719//Pathways in cancer;Shigellosis;Rap1 signaling pathway;Axon guidance;Small cell lung cancer;Dilated cardiomyopathy;Focal adhesion;Toxoplasmosis;Regulation of actin cytoskeleton;Pathogenic Escherichia coli infection;Platelet activation;Hypertrophic cardiomyopathy (HCM);Leukocyte transendothelial migration;ECM-receptor interaction;Pertussis;Phagosome;PI3K-Akt signaling pathway;Cell adhesion …
Dapk3	ENSMUSG00000034974		-0.207109	0.0136898	0.0368459		-0.233104	0.00144678	0.00839424		GO:0005737//cytoplasm;GO:0045121//membrane raft;GO:0000775//chromosome, centromeric region;GO:0005884//actin filament;GO:0016605//PML body;GO:0005634//nucleus;GO:0005815//microtubule organizing center;GO:0005856//cytoskeleton;GO:0005694//chromosome	GO:0071346//cellular response to interferon-gamma;GO:0097190//apoptotic signaling pathway;GO:0008360//regulation of cell shape;GO:2001241//positive regulation of extrinsic apoptotic signaling pathway in absence of ligand;GO:0043065//positive regulation of apoptotic process;GO:0090263//positive regulation of canonical Wnt signaling pathway;GO:0051893//regulation of focal adhesion assembly;GO:00063…	GO:0016301//kinase activity;GO:0004672//protein kinase activity;GO:0000166//nucleotide binding;GO:0008022//protein C-terminus binding;GO:0043522//leucine zipper domain binding;GO:0004674//protein serine/threonine kinase activity;GO:0042803//protein homodimerization activity;GO:0016740//transferase activity;GO:0042802//identical protein binding;GO:0017048//Rho GTPase binding;GO:0005524//ATP bindin…	K08803//Bladder cancer;Pathways in cancer
Dbn1	ENSMUSG00000034675		-0.695905	2.41e-30	5.89e-29		-0.265024	9.16e-05	0.000809172		GO:0005921//gap junction;GO:0030426//growth cone;GO:0016020//membrane;GO:0005886//plasma membrane;GO:0005938//cell cortex;GO:0005737//cytoplasm;GO:0042995//cell projection;GO:0030054//cell junction;GO:0015629//actin cytoskeleton;GO:0005622//intracellular;GO:0005911//cell-cell junction	GO:0010644//cell communication by electrical coupling;GO:0010643//cell communication by chemical coupling;GO:0061351//neural precursor cell proliferation;GO:0030154//cell differentiation;GO:0007275//multicellular organism development;GO:0048699//generation of neurons;GO:0007015//actin filament organization;GO:0032507//maintenance of protein location in cell;GO:0007399//nervous system development	GO:0005515//protein binding;GO:0005522//profilin binding;GO:0003779//actin binding;GO:0045296//cadherin binding	-
Dbp	ENSMUSG00000059824		-0.99142	1.97e-21	3.38e-20		-0.695509	1.49e-07	2.71e-06		GO:0005654//nucleoplasm;GO:0005634//nucleus	GO:0048511//rhythmic process;GO:0045944//positive regulation of transcription from RNA polymerase II promoter;GO:0006366//transcription from RNA polymerase II promoter;GO:0006351//transcription, DNA-templated;GO:0007623//circadian rhythm;GO:0006355//regulation of transcription, DNA-templated;GO:0006357//regulation of transcription from RNA polymerase II promoter;GO:0007275//multicellular organism…	GO:0000977//RNA polymerase II regulatory region sequence-specific DNA binding;GO:0003700//transcription factor activity, sequence-specific DNA binding;GO:0001077//transcriptional activator activity, RNA polymerase II core promoter proximal region sequence-specific binding;GO:0003677//DNA binding	-
Dctn2	ENSMUSG00000025410		-0.220307	0.00036441	0.00142327		-0.179737	0.000513087	0.00350315		GO:0030426//growth cone;GO:0005874//microtubule;GO:0000776//kinetochore;GO:0005856//cytoskeleton;GO:0005829//cytosol;GO:0031982//vesicle;GO:0005815//microtubule organizing center;GO:0016020//membrane;GO:0005813//centrosome;GO:0005737//cytoplasm;GO:0030286//dynein complex;GO:0005869//dynactin complex;GO:0070062//extracellular exosome	GO:0032402//melanosome transport;GO:0008283//cell proliferation;GO:0000278//mitotic cell cycle;GO:0007052//mitotic spindle organization;GO:0007017//microtubule-based process;GO:0071539//protein localization to centrosome	GO:0003774//motor activity;GO:0019901//protein kinase binding;GO:0030507//spectrin binding;GO:0042802//identical protein binding;GO:0005515//protein binding	K10424//Vasopressin-regulated water reabsorption;Huntington's disease
Ddah2	ENSMUSG00000007039		-0.273012	0.0132626	0.0358518		-0.310754	4.27e-06	5.46e-05		GO:0005737//cytoplasm;GO:0005815//microtubule organizing center;GO:0005829//cytosol;GO:0005739//mitochondrion;GO:0070062//extracellular exosome	GO:0045429//positive regulation of nitric oxide biosynthetic process;GO:0000052//citrulline metabolic process;GO:0006527//arginine catabolic process;GO:0006525//arginine metabolic process	GO:0016597//amino acid binding;GO:0016787//hydrolase activity;GO:0016403//dimethylargininase activity	-
Dglucy	ENSMUSG00000021185		-0.406206	0.00901369	0.0256329		-0.459891	0.0101368	0.0411246		GO:0005739//mitochondrion;GO:0005759//mitochondrial matrix	GO:0006536//glutamate metabolic process	GO:0047820//D-glutamate cyclase activity;GO:0016829//lyase activity	-
Dynlrb1	ENSMUSG00000047459		-0.316776	0.000324443	0.00128272		-0.177949	0.00511521	0.0236611		GO:0016020//membrane;GO:0005856//cytoskeleton;GO:0005868//cytoplasmic dynein complex;GO:0005874//microtubule;GO:0036157//outer dynein arm;GO:0005813//centrosome;GO:0005737//cytoplasm;GO:0030286//dynein complex	GO:0007018//microtubule-based movement;GO:0009416//response to light stimulus;GO:0007632//visual behavior;GO:0006810//transport	GO:0045505//dynein intermediate chain binding;GO:0003774//motor activity;GO:0005515//protein binding;GO:0042802//identical protein binding	-
Dzip1	ENSMUSG00000042156		-0.756697	1.53e-32	4.03e-31		-0.182637	0.00405133	0.0195243		GO:0005814//centriole;GO:0097539//ciliary transition fiber;GO:0036064//ciliary basal body;GO:0005829//cytosol;GO:0005634//nucleus;GO:0005815//microtubule organizing center;GO:0005856//cytoskeleton;GO:0005654//nucleoplasm;GO:0005929//cilium;GO:0042995//cell projection;GO:0005737//cytoplasm	GO:0007275//multicellular organism development;GO:0030154//cell differentiation;GO:0051220//cytoplasmic sequestering of protein;GO:0007283//spermatogenesis;GO:0045184//establishment of protein localization;GO:0007224//smoothened signaling pathway;GO:0060271//cilium assembly	GO:0005515//protein binding;GO:0003676//nucleic acid binding;GO:0046872//metal ion binding	-
E530011L22Rik	ENSMUSG00000097820		-1.30424	1.69e-14	1.99e-13		-0.621858	0.00800975	0.0339901		-	-	-	-
[truncated: 293 more rows]
