# Supplementary material for: Dicalcium silicate microparticles modulate the differential expression of circRNAs and mRNAs in BMSCs and promote osteogenesisviacirc_1983–miR-6931–Gas7 interaction
Source: Royal Society of Chemistry journal article supplement (doi:10.1039/d0bm00459f), 2020-01-01
Supplement: d0bm00459f5.xlsx [file d0bm00459f5.xlsx]

## Sheet: tableS4
Supplementary Table 4. Proteintial ceRNA network in BMSCs.
miRNA		circRNA1	circRNA-miRNA interaction						Symbl	mRNA-miRNA interaction						Express correlation between circRNA and mRNA
			Score2	Energe2	Aligned length2	Ratio2				Score2	Energe2	Aligned length2	Ratio2			Correlation3	P3
mmu-miR-1187		circ_1804	193	-31.93	20	90	95		CCBE1	184	-30.82	19	84.21	94.74		0.783349	0.0125168
mmu-miR-1187		circ_1804	193	-31.93	20	90	95		EPAS1	197	-33.92	20	95	95		0.861684	0.00282288
mmu-miR-1187		circ_1804	193	-31.93	20	90	95		SLC6A6	197	-33.92	20	95	95		0.783349	0.0125168
mmu-miR-1187		circ_1804	193	-31.93	20	90	95		KLHL2	181	-30.17	20	70	100		0.809461	0.0082066
mmu-miR-1187		circ_1804	193	-31.93	20	90	95		DCTD	197	-33.92	20	95	95		0.826869	0.00597575
mmu-miR-1187		circ_1804	193	-31.93	20	90	95		SEPP1	197	-33.92	20	95	95		0.870388	0.0022686
mmu-miR-1187		circ_1804	193	-31.93	20	90	95		LRRN4CL	181	-30.54	20	75	95		0.835573	0.00503382
mmu-miR-1187		circ_1804	193	-31.93	20	90	95		TRIOBP	201	-37.79	20	95	100		0.870388	0.0022686
mmu-miR-1187		circ_1804	193	-31.93	20	90	95		HMGA2	189	-31.48	20	85	95		0.783349	0.0125168
mmu-miR-1187		circ_1804	193	-31.93	20	90	95		WDR46	197	-33.92	20	95	95		0.818165	0.00703117
mmu-miR-1187		circ_1804	193	-31.93	20	90	95		PRMT3	177	-30.95	20	70	95		0.818165	0.00703117
mmu-miR-1187		circ_1804	193	-31.93	20	90	95		AMOTL1	197	-35.8	20	90	100		0.818165	0.00703117
mmu-miR-1187		circ_1804	193	-31.93	20	90	95		DHRS9	185	-31.4	21	80.95	90.48		0.8965	0.00105998
mmu-miR-1187		circ_1804	193	-31.93	20	90	95		PYDC3	197	-33.92	20	95	95		0.826869	0.00597575
mmu-miR-1187		circ_946	180	-30.03	22	77.27	90.91		CCBE1	184	-30.82	19	84.21	94.74		0.858099	0.00307611
mmu-miR-1187		circ_946	180	-30.03	22	77.27	90.91		EPAS1	197	-33.92	20	95	95		0.803326	0.00911066
mmu-miR-1187		circ_946	180	-30.03	22	77.27	90.91		SLC6A6	197	-33.92	20	95	95		0.858099	0.00307611
mmu-miR-1187		circ_946	180	-30.03	22	77.27	90.91		KLHL2	181	-30.17	20	70	100		0.839841	0.00461137
mmu-miR-1187		circ_946	180	-30.03	22	77.27	90.91		DCTD	197	-33.92	20	95	95		0.839841	0.00461137
mmu-miR-1187		circ_946	180	-30.03	22	77.27	90.91		SEPP1	197	-33.92	20	95	95		0.785069	0.0121946
mmu-miR-1187		circ_946	180	-30.03	22	77.27	90.91		NRP2	185	-31.1	20	80	95		0.894614	0.00112701
mmu-miR-1187		circ_946	180	-30.03	22	77.27	90.91		LRRN4CL	181	-30.54	20	75	95		0.785069	0.0121946
mmu-miR-1187		circ_946	180	-30.03	22	77.27	90.91		TRIOBP	201	-37.79	20	95	100		0.748554	0.0203173
mmu-miR-1187		circ_946	180	-30.03	22	77.27	90.91		HMGA2	189	-31.48	20	85	95		0.858099	0.00307611
mmu-miR-1187		circ_946	180	-30.03	22	77.27	90.91		WDR46	197	-33.92	20	95	95		0.839841	0.00461137
mmu-miR-1187		circ_946	180	-30.03	22	77.27	90.91		PRMT3	177	-30.95	20	70	95		0.839841	0.00461137
mmu-miR-1187		circ_946	180	-30.03	22	77.27	90.91		AMOTL1	197	-35.8	20	90	100		0.839841	0.00461137
mmu-miR-1187		circ_946	180	-30.03	22	77.27	90.91		DHRS9	185	-31.4	21	80.95	90.48		0.785069	0.0121946
mmu-miR-1187		circ_946	180	-30.03	22	77.27	90.91		PYDC3	197	-33.92	20	95	95		0.839841	0.00461137
mmu-miR-1187		circ_1097	197	-33.92	20	95	95		CCBE1	184	-30.82	19	84.21	94.74		0.762821	0.016814
mmu-miR-1187		circ_1097	197	-33.92	20	95	95		EPAS1	197	-33.92	20	95	95		0.847579	0.00390855
mmu-miR-1187		circ_1097	197	-33.92	20	95	95		SLC6A6	197	-33.92	20	95	95		0.762821	0.016814
mmu-miR-1187		circ_1097	197	-33.92	20	95	95		KLHL2	181	-30.17	20	70	100		0.813676	0.00762197
mmu-miR-1187		circ_1097	197	-33.92	20	95	95		DCTD	197	-33.92	20	95	95		0.728918	0.0258836
mmu-miR-1187		circ_1097	197	-33.92	20	95	95		SEPP1	197	-33.92	20	95	95		0.762821	0.016814
mmu-miR-1187		circ_1097	197	-33.92	20	95	95		TRIOBP	201	-37.79	20	95	100		0.728918	0.0258836
mmu-miR-1187		circ_1097	197	-33.92	20	95	95		HMGA2	189	-31.48	20	85	95		0.762821	0.016814
mmu-miR-1187		circ_1097	197	-33.92	20	95	95		PRMT3	177	-30.95	20	70	95		0.711967	0.0314253
mmu-miR-1187		circ_1097	197	-33.92	20	95	95		AMOTL1	197	-35.8	20	90	100		0.711967	0.0314253
mmu-miR-1187		circ_1097	197	-33.92	20	95	95		DHRS9	185	-31.4	21	80.95	90.48		0.796725	0.0101563
mmu-miR-1187		circ_1097	197	-33.92	20	95	95		PYDC3	197	-33.92	20	95	95		0.779773	0.0132052
mmu-miR-1187		circ_779	185	-30.98	20	75	100		CCBE1	184	-30.82	19	84.21	94.74		0.803326	0.00911066
mmu-miR-1187		circ_779	185	-30.98	20	75	100		EPAS1	197	-33.92	20	95	95		0.858099	0.00307611
mmu-miR-1187		circ_779	185	-30.98	20	75	100		SLC6A6	197	-33.92	20	95	95		0.803326	0.00911066
mmu-miR-1187		circ_779	185	-30.98	20	75	100		KLHL2	181	-30.17	20	70	100		0.894614	0.00112701
mmu-miR-1187		circ_779	185	-30.98	20	75	100		DCTD	197	-33.92	20	95	95		0.894614	0.00112701
mmu-miR-1187		circ_779	185	-30.98	20	75	100		SEPP1	197	-33.92	20	95	95		0.894614	0.00112701
mmu-miR-1187		circ_779	185	-30.98	20	75	100		NRP2	185	-31.1	20	80	95		0.785069	0.0121946
mmu-miR-1187		circ_779	185	-30.98	20	75	100		LRRN4CL	181	-30.54	20	75	95		0.839841	0.00461137
mmu-miR-1187		circ_779	185	-30.98	20	75	100		TRIOBP	201	-37.79	20	95	100		0.803326	0.00911066
mmu-miR-1187		circ_779	185	-30.98	20	75	100		HMGA2	189	-31.48	20	85	95		0.803326	0.00911066
mmu-miR-1187		circ_779	185	-30.98	20	75	100		WDR46	197	-33.92	20	95	95		0.785069	0.0121946
mmu-miR-1187		circ_779	185	-30.98	20	75	100		PRMT3	177	-30.95	20	70	95		0.785069	0.0121946
mmu-miR-1187		circ_779	185	-30.98	20	75	100		AMOTL1	197	-35.8	20	90	100		0.785069	0.0121946
mmu-miR-1187		circ_779	185	-30.98	20	75	100		DHRS9	185	-31.4	21	80.95	90.48		0.839841	0.00461137
mmu-miR-1187		circ_779	185	-30.98	20	75	100		PYDC3	197	-33.92	20	95	95		0.894614	0.00112701
mmu-miR-1187		circ_2201	193	-32.69	20	90	95		CCBE1	184	-30.82	19	84.21	94.74		0.779773	0.0132052
mmu-miR-1187		circ_2201	193	-32.69	20	90	95		EPAS1	197	-33.92	20	95	95		0.728918	0.0258836
mmu-miR-1187		circ_2201	193	-32.69	20	90	95		SLC6A6	197	-33.92	20	95	95		0.779773	0.0132052
mmu-miR-1187		circ_2201	193	-32.69	20	90	95		NRP2	185	-31.1	20	80	95		0.728918	0.0258836
mmu-miR-1187		circ_2201	193	-32.69	20	90	95		HMGA2	189	-31.48	20	85	95		0.779773	0.0132052
mmu-miR-1187		circ_2201	193	-32.69	20	90	95		PRMT3	177	-30.95	20	70	95		0.813676	0.00762197
mmu-miR-1187		circ_2201	193	-32.69	20	90	95		AMOTL1	197	-35.8	20	90	100		0.813676	0.00762197
mmu-miR-1187		circ_2201	193	-32.69	20	90	95		DHRS9	185	-31.4	21	80.95	90.48		0.762821	0.016814
mmu-miR-1187		circ_2201	193	-32.69	20	90	95		PYDC3	197	-33.92	20	95	95		0.762821	0.016814
mmu-miR-1187		circ_1078	189	-31.26	20	85	95		CCBE1	184	-30.82	19	84.21	94.74		0.858099	0.00307611
mmu-miR-1187		circ_1078	189	-31.26	20	85	95		EPAS1	197	-33.92	20	95	95		0.766812	0.0159118
mmu-miR-1187		circ_1078	189	-31.26	20	85	95		SLC6A6	197	-33.92	20	95	95		0.858099	0.00307611
mmu-miR-1187		circ_1078	189	-31.26	20	85	95		KLHL2	181	-30.17	20	70	100		0.730297	0.0254636
mmu-miR-1187		circ_1078	189	-31.26	20	85	95		NRP2	185	-31.1	20	80	95		0.821584	0.00660266
mmu-miR-1187		circ_1078	189	-31.26	20	85	95		HMGA2	189	-31.48	20	85	95		0.858099	0.00307611
mmu-miR-1187		circ_1078	189	-31.26	20	85	95		WDR46	197	-33.92	20	95	95		0.839841	0.00461137
mmu-miR-1187		circ_1078	189	-31.26	20	85	95		PRMT3	177	-30.95	20	70	95		0.839841	0.00461137
mmu-miR-1187		circ_1078	189	-31.26	20	85	95		AMOTL1	197	-35.8	20	90	100		0.839841	0.00461137
mmu-miR-1187		circ_1078	189	-31.26	20	85	95		DHRS9	185	-31.4	21	80.95	90.48		0.748554	0.0203173
mmu-miR-1188-5p		circ_2201	171	-31.85	20	75	85		PIK3R5	183	-37.07	19	89.47	89.47		0.796725	0.0101563
mmu-miR-1188-5p		circ_2201	171	-31.85	20	75	85		TGFBR1	166	-30.27	20	75	80		0.762821	0.016814
mmu-miR-1188-5p		circ_1097	171	-31.85	20	75	85		AUTS2	171	-34.02	20	75	85		0.796725	0.0101563
mmu-miR-1188-5p		circ_1097	171	-31.85	20	75	85		PIK3R5	183	-37.07	19	89.47	89.47		0.728918	0.0258836
mmu-miR-1188-5p		circ_1097	171	-31.85	20	75	85		TGFBR1	166	-30.27	20	75	80		0.779773	0.0132052
mmu-miR-1188-5p		circ_1097	171	-31.85	20	75	85		EXOC3L4	166	-31.84	18	77.78	83.33		0.762821	0.016814
mmu-miR-1195		circ_3118	193	-42.37	20	90	95		NMD3	181	-30.08	22	81.82	81.82		0.772315	0.0147213
mmu-miR-1195		circ_3118	193	-42.37	20	90	95		CHKA	189	-41.76	20	85	95		0.703005	0.0346443
mmu-miR-1195		circ_34	185	-33.95	21	80.95	90.48		NMD3	181	-30.08	22	81.82	81.82		0.8	0.0138283
mmu-miR-1195		circ_34	185	-33.95	21	80.95	90.48		ZCCHC4	193	-43.02	20	90	95		0.933333	0.000749559
mmu-miR-1195		circ_34	185	-33.95	21	80.95	90.48		MTA2	189	-38.82	20	90	90		0.9	0.00202822
mmu-miR-1195		circ_34	185	-33.95	21	80.95	90.48		KPNA2	197	-45.48	20	95	95		0.916667	0.00131173
mmu-miR-1195		circ_34	185	-33.95	21	80.95	90.48		CHKA	189	-41.76	20	85	95		0.933333	0.000749559
mmu-miR-1195		circ_34	185	-33.95	21	80.95	90.48		NAV1	197	-45.31	20	95	95		0.816667	0.0107694
mmu-miR-1195		circ_34	185	-33.95	21	80.95	90.48		TOP1	197	-45.31	20	95	95		0.833333	0.0082672
mmu-miR-1195		circ_34	185	-33.95	21	80.95	90.48		LRRN4CL	197	-45.31	20	95	95		0.833333	0.0082672
mmu-miR-1195		circ_34	185	-33.95	21	80.95	90.48		UTP15	193	-41.93	22	86.36	90.91		0.95	0.000352734
mmu-miR-1195		circ_34	185	-33.95	21	80.95	90.48		AVEN	197	-45.31	20	95	95		0.85	0.00607363
mmu-miR-1195		circ_34	185	-33.95	21	80.95	90.48		BRCC3	197	-45.31	20	95	95		0.933333	0.000749559
mmu-miR-1195		circ_34	185	-33.95	21	80.95	90.48		SLC22A15	181	-33.02	20	85	85		0.833333	0.0082672
mmu-miR-1195		circ_34	185	-33.95	21	80.95	90.48		PFAS	197	-45.31	20	95	95		0.883333	0.0030754
mmu-miR-1195		circ_34	185	-33.95	21	80.95	90.48		PBDC1	197	-45.31	20	95	95		0.833333	0.0082672
mmu-miR-1195		circ_93	189	-39.9	20	90	90		NMD3	181	-30.08	22	81.82	81.82		0.839841	0.00461137
mmu-miR-1195		circ_93	189	-39.9	20	90	90		ZCCHC4	193	-43.02	20	90	95		0.839841	0.00461137
mmu-miR-1195		circ_93	189	-39.9	20	90	90		MTA2	189	-38.82	20	90	90		0.748554	0.0203173
mmu-miR-1195		circ_93	189	-39.9	20	90	90		KPNA2	197	-45.48	20	95	95		0.912871	0.000589839
mmu-miR-1195		circ_93	189	-39.9	20	90	90		CHKA	189	-41.76	20	85	95		0.785069	0.0121946
mmu-miR-1195		circ_93	189	-39.9	20	90	90		NAV1	197	-45.31	20	95	95		0.803326	0.00911066
mmu-miR-1195		circ_93	189	-39.9	20	90	90		TOP1	197	-45.31	20	95	95		0.803326	0.00911066
mmu-miR-1195		circ_93	189	-39.9	20	90	90		LRRN4CL	197	-45.31	20	95	95		0.839841	0.00461137
mmu-miR-1195		circ_93	189	-39.9	20	90	90		UTP15	193	-41.93	22	86.36	90.91		0.839841	0.00461137
mmu-miR-1195		circ_93	189	-39.9	20	90	90		AVEN	197	-45.31	20	95	95		0.894614	0.00112701
mmu-miR-1195		circ_93	189	-39.9	20	90	90		BRCC3	197	-45.31	20	95	95		0.803326	0.00911066
mmu-miR-1195		circ_93	189	-39.9	20	90	90		SLC22A15	181	-33.02	20	85	85		0.858099	0.00307611
mmu-miR-1195		circ_93	189	-39.9	20	90	90		PFAS	197	-45.31	20	95	95		0.803326	0.00911066
mmu-miR-1195		circ_93	189	-39.9	20	90	90		PBDC1	197	-45.31	20	95	95		0.912871	0.000589839
mmu-miR-1224-3p		circ_167	179	-34.26	19	84.21	89.47		LRRFIP1	166	-30.07	18	77.78	83.33		0.839841	0.00461137
mmu-miR-1224-3p		circ_167	179	-34.26	19	84.21	89.47		SIPA1L2	175	-38.96	18	77.78	94.44		0.803326	0.00911066
mmu-miR-1224-3p		circ_167	179	-34.26	19	84.21	89.47		PTGES	169	-30.06	18	83.33	83.33		0.839841	0.00461137
mmu-miR-1249-5p		circ_3592	160	-31.88	18	72.22	83.33		PRKG2	173	-32.18	19	84.21	84.21		0.752512	0.0193012
mmu-miR-1249-5p		circ_3592	160	-31.88	18	72.22	83.33		LRRK2	179	-32.81	24	70.83	83.33		0.703005	0.0346443
mmu-miR-1249-5p		circ_3592	160	-31.88	18	72.22	83.33		ETV1	171	-32.06	23	78.26	78.26		0.752512	0.0193012
mmu-miR-1249-5p		circ_3592	160	-31.88	18	72.22	83.33		SLC22A15	171	-31.98	22	72.73	81.82		0.752512	0.0193012
mmu-miR-1249-5p		circ_3592	160	-31.88	18	72.22	83.33		EPAS1	166	-34.45	21	71.43	76.19		0.752512	0.0193012
mmu-miR-127-5p		circ_946	172	-32.64	22	77.27	77.27		SEMA4B	180	-34	21	80.95	85.71		0.839841	0.00461137
mmu-miR-145a-5p		circ_2201	181	-32.29	21	80.95	85.71		ANTXR2	169	-32.66	24	70.83	75		0.728918	0.0258836
mmu-miR-149-3p		circ_2313	175	-36.79	18	83.33	88.89		FGF10	170	-33.69	18	77.78	88.89		0.830628	0.00555542
mmu-miR-149-3p		circ_2313	175	-36.79	18	83.33	88.89		DCBLD2	172	-40.42	21	71.43	85.71		0.830628	0.00555542
mmu-miR-149-3p		circ_2313	175	-36.79	18	83.33	88.89		FMNL2	166	-38.75	19	78.95	78.95		0.847579	0.00390855
mmu-miR-149-3p		circ_2313	175	-36.79	18	83.33	88.89		ADCY8	168	-34.25	20	70	85		0.74587	0.0210263
mmu-miR-149-3p		circ_2313	175	-36.79	18	83.33	88.89		KNOP1	171	-37.7	19	78.95	84.21		0.881483	0.00167742
mmu-miR-149-3p		circ_2313	175	-36.79	18	83.33	88.89		HEATR1	166	-34.62	20	75	80		0.864531	0.00263237
mmu-miR-149-3p		circ_2313	175	-36.79	18	83.33	88.89		GRIA1	164	-37.78	19	73.68	78.95		0.864531	0.00263237
mmu-miR-149-3p		circ_2313	175	-36.79	18	83.33	88.89		MAP3K14	176	-38.53	22	77.27	81.82		0.813676	0.00762197
mmu-miR-149-3p		circ_2313	175	-36.79	18	83.33	88.89		SERPINE2	172	-35.22	19	78.95	84.21		0.847579	0.00390855
mmu-miR-149-3p		circ_2313	175	-36.79	18	83.33	88.89		HLF	167	-35.86	19	73.68	84.21		0.830628	0.00555542
mmu-miR-149-3p		circ_2313	175	-36.79	18	83.33	88.89		RBPMS	163	-30.77	20	70	80		0.779773	0.0132052
mmu-miR-149-3p		circ_2313	175	-36.79	18	83.33	88.89		FRRS1	175	-37.3	19	84.21	84.21		0.881483	0.00167742
mmu-miR-149-3p		circ_2313	175	-36.79	18	83.33	88.89		KLRA2	173	-37.05	18	83.33	88.89		0.847579	0.00390855
mmu-miR-149-3p		circ_2313	175	-36.79	18	83.33	88.89		JADE2	176	-43.37	22	77.27	81.82		0.864531	0.00263237
mmu-miR-149-3p		circ_2313	175	-36.79	18	83.33	88.89		PRMT3	165	-32.62	20	75	80		0.864531	0.00263237
mmu-miR-149-3p		circ_2313	175	-36.79	18	83.33	88.89		ANTXR2	171	-36.91	25	76	76		0.762821	0.016814
mmu-miR-149-3p		circ_2313	175	-36.79	18	83.33	88.89		LDLRAP1	171	-37.61	21	71.43	85.71		0.864531	0.00263237
mmu-miR-149-3p		circ_2313	175	-36.79	18	83.33	88.89		NUFIP1	161	-34.18	19	73.68	84.21		0.813676	0.00762197
mmu-miR-149-3p		circ_2313	175	-36.79	18	83.33	88.89		PLEKHM1	164	-37.11	21	71.43	76.19		0.74587	0.0210263
mmu-miR-149-3p		circ_2313	175	-36.79	18	83.33	88.89		LIMK1	166	-30.08	19	73.68	84.21		0.847579	0.00390855
mmu-miR-149-3p		circ_2313	175	-36.79	18	83.33	88.89		PREB	161	-34.28	20	70	85		0.830628	0.00555542
mmu-miR-149-3p		circ_2313	175	-36.79	18	83.33	88.89		SH3RF1	168	-31.03	22	72.73	77.27		0.779773	0.0132052
mmu-miR-149-3p		circ_2313	175	-36.79	18	83.33	88.89		CCBE1	175	-36.06	19	84.21	84.21		0.830628	0.00555542
mmu-miR-149-3p		circ_2313	175	-36.79	18	83.33	88.89		WNK4	171	-35.8	21	76.19	80.95		0.74587	0.0210263
mmu-miR-149-3p		circ_2313	175	-36.79	18	83.33	88.89		AUTS2	179	-45.26	19	84.21	89.47		0.728918	0.0258836
mmu-miR-149-3p		circ_2313	175	-36.79	18	83.33	88.89		EPS8	175	-37.05	19	78.95	89.47		0.847579	0.00390855
mmu-miR-149-3p		circ_2313	175	-36.79	18	83.33	88.89		CIAPIN1	166	-31.83	18	77.78	83.33		0.762821	0.016814
mmu-miR-149-3p		circ_2313	175	-36.79	18	83.33	88.89		E2F8	172	-36.51	22	72.73	81.82		0.830628	0.00555542
mmu-miR-149-3p		circ_2313	175	-36.79	18	83.33	88.89		HIPK2	184	-42.24	19	89.47	89.47		0.779773	0.0132052
mmu-miR-149-3p		circ_2313	175	-36.79	18	83.33	88.89		ETV1	175	-36.58	19	84.21	84.21		0.881483	0.00167742
mmu-miR-149-3p		circ_2313	175	-36.79	18	83.33	88.89		EPAS1	175	-36.5	19	78.95	89.47		0.847579	0.00390855
mmu-miR-149-3p		circ_2313	175	-36.79	18	83.33	88.89		FAM169B	167	-34.5	19	73.68	84.21		0.864531	0.00263237
mmu-miR-149-3p		circ_946	170	-34.3	18	77.78	88.89		FGF10	170	-33.69	18	77.78	88.89		0.858099	0.00307611
mmu-miR-149-3p		circ_946	170	-34.3	18	77.78	88.89		DCBLD2	172	-40.42	21	71.43	85.71		0.858099	0.00307611
mmu-miR-149-3p		circ_946	170	-34.3	18	77.78	88.89		FMNL2	166	-38.75	19	78.95	78.95		0.803326	0.00911066
mmu-miR-149-3p		circ_946	170	-34.3	18	77.78	88.89		ADCY8	168	-34.25	20	70	85		0.803326	0.00911066
mmu-miR-149-3p		circ_946	170	-34.3	18	77.78	88.89		KNOP1	171	-37.7	19	78.95	84.21		0.858099	0.00307611
mmu-miR-149-3p		circ_946	170	-34.3	18	77.78	88.89		HEATR1	166	-34.62	20	75	80		0.894614	0.00112701
mmu-miR-149-3p		circ_946	170	-34.3	18	77.78	88.89		GRIA1	164	-37.78	19	73.68	78.95		0.894614	0.00112701
mmu-miR-149-3p		circ_946	170	-34.3	18	77.78	88.89		MAP3K14	176	-38.53	22	77.27	81.82		0.803326	0.00911066
mmu-miR-149-3p		circ_946	170	-34.3	18	77.78	88.89		SERPINE2	172	-35.22	19	78.95	84.21		0.803326	0.00911066
mmu-miR-149-3p		circ_946	170	-34.3	18	77.78	88.89		HLF	167	-35.86	19	73.68	84.21		0.858099	0.00307611
mmu-miR-149-3p		circ_946	170	-34.3	18	77.78	88.89		RBPMS	163	-30.77	20	70	80		0.821584	0.00660266
mmu-miR-149-3p		circ_946	170	-34.3	18	77.78	88.89		FRRS1	175	-37.3	19	84.21	84.21		0.858099	0.00307611
mmu-miR-149-3p		circ_946	170	-34.3	18	77.78	88.89		KLRA2	173	-37.05	18	83.33	88.89		0.912871	0.000589839
mmu-miR-149-3p		circ_946	170	-34.3	18	77.78	88.89		JADE2	176	-43.37	22	77.27	81.82		0.839841	0.00461137
mmu-miR-149-3p		circ_946	170	-34.3	18	77.78	88.89		PRMT3	165	-32.62	20	75	80		0.839841	0.00461137
mmu-miR-149-3p		circ_946	170	-34.3	18	77.78	88.89		ANTXR2	171	-36.91	25	76	76		0.894614	0.00112701
mmu-miR-149-3p		circ_946	170	-34.3	18	77.78	88.89		LDLRAP1	171	-37.61	21	71.43	85.71		0.858099	0.00307611
mmu-miR-149-3p		circ_946	170	-34.3	18	77.78	88.89		NUFIP1	161	-34.18	19	73.68	84.21		0.894614	0.00112701
mmu-miR-149-3p		circ_946	170	-34.3	18	77.78	88.89		PLEKHM1	164	-37.11	21	71.43	76.19		0.712039	0.0314
mmu-miR-149-3p		circ_946	170	-34.3	18	77.78	88.89		LIMK1	166	-30.08	19	73.68	84.21		0.858099	0.00307611
mmu-miR-149-3p		circ_946	170	-34.3	18	77.78	88.89		PREB	161	-34.28	20	70	85		0.858099	0.00307611
mmu-miR-149-3p		circ_946	170	-34.3	18	77.78	88.89		SH3RF1	168	-31.03	22	72.73	77.27		0.821584	0.00660266
mmu-miR-149-3p		circ_946	170	-34.3	18	77.78	88.89		CCBE1	175	-36.06	19	84.21	84.21		0.858099	0.00307611
mmu-miR-149-3p		circ_946	170	-34.3	18	77.78	88.89		WNK4	171	-35.8	21	76.19	80.95		0.785069	0.0121946
mmu-miR-149-3p		circ_946	170	-34.3	18	77.78	88.89		EPS8	175	-37.05	19	78.95	89.47		0.785069	0.0121946
mmu-miR-149-3p		circ_946	170	-34.3	18	77.78	88.89		CIAPIN1	166	-31.83	18	77.78	83.33		0.803326	0.00911066
mmu-miR-149-3p		circ_946	170	-34.3	18	77.78	88.89		E2F8	172	-36.51	22	72.73	81.82		0.858099	0.00307611
mmu-miR-149-3p		circ_946	170	-34.3	18	77.78	88.89		HIPK2	184	-42.24	19	89.47	89.47		0.821584	0.00660266
mmu-miR-149-3p		circ_946	170	-34.3	18	77.78	88.89		ETV1	175	-36.58	19	84.21	84.21		0.803326	0.00911066
mmu-miR-149-3p		circ_946	170	-34.3	18	77.78	88.89		EPAS1	175	-36.5	19	78.95	89.47		0.803326	0.00911066
mmu-miR-149-3p		circ_946	170	-34.3	18	77.78	88.89		FAM169B	167	-34.5	19	73.68	84.21		0.858099	0.00307611
mmu-miR-149-3p		circ_779	172	-35.22	19	78.95	84.21		FGF10	170	-33.69	18	77.78	88.89		0.803326	0.00911066
mmu-miR-149-3p		circ_779	172	-35.22	19	78.95	84.21		DCBLD2	172	-40.42	21	71.43	85.71		0.803326	0.00911066
mmu-miR-149-3p		circ_779	172	-35.22	19	78.95	84.21		FMNL2	166	-38.75	19	78.95	78.95		0.858099	0.00307611
mmu-miR-149-3p		circ_779	172	-35.22	19	78.95	84.21		ADCY8	168	-34.25	20	70	85		0.748554	0.0203173
mmu-miR-149-3p		circ_779	172	-35.22	19	78.95	84.21		KNOP1	171	-37.7	19	78.95	84.21		0.803326	0.00911066
mmu-miR-149-3p		circ_779	172	-35.22	19	78.95	84.21		HEATR1	166	-34.62	20	75	80		0.839841	0.00461137
mmu-miR-149-3p		circ_779	172	-35.22	19	78.95	84.21		GRIA1	164	-37.78	19	73.68	78.95		0.839841	0.00461137
mmu-miR-149-3p		circ_779	172	-35.22	19	78.95	84.21		MAP3K14	176	-38.53	22	77.27	81.82		0.858099	0.00307611
mmu-miR-149-3p		circ_779	172	-35.22	19	78.95	84.21		SERPINE2	172	-35.22	19	78.95	84.21		0.858099	0.00307611
mmu-miR-149-3p		circ_779	172	-35.22	19	78.95	84.21		HLF	167	-35.86	19	73.68	84.21		0.803326	0.00911066
mmu-miR-149-3p		circ_779	172	-35.22	19	78.95	84.21		RBPMS	163	-30.77	20	70	80		0.712039	0.0314
mmu-miR-149-3p		circ_779	172	-35.22	19	78.95	84.21		FRRS1	175	-37.3	19	84.21	84.21		0.803326	0.00911066
mmu-miR-149-3p		circ_779	172	-35.22	19	78.95	84.21		KLRA2	173	-37.05	18	83.33	88.89		0.803326	0.00911066
mmu-miR-149-3p		circ_779	172	-35.22	19	78.95	84.21		JADE2	176	-43.37	22	77.27	81.82		0.785069	0.0121946
mmu-miR-149-3p		circ_779	172	-35.22	19	78.95	84.21		PRMT3	165	-32.62	20	75	80		0.785069	0.0121946
mmu-miR-149-3p		circ_779	172	-35.22	19	78.95	84.21		ANTXR2	171	-36.91	25	76	76		0.785069	0.0121946
mmu-miR-149-3p		circ_779	172	-35.22	19	78.95	84.21		LDLRAP1	171	-37.61	21	71.43	85.71		0.803326	0.00911066
mmu-miR-149-3p		circ_779	172	-35.22	19	78.95	84.21		NUFIP1	161	-34.18	19	73.68	84.21		0.839841	0.00461137
mmu-miR-149-3p		circ_779	172	-35.22	19	78.95	84.21		PLEKHM1	164	-37.11	21	71.43	76.19		0.821584	0.00660266
mmu-miR-149-3p		circ_779	172	-35.22	19	78.95	84.21		LIMK1	166	-30.08	19	73.68	84.21		0.748554	0.0203173
mmu-miR-149-3p		circ_779	172	-35.22	19	78.95	84.21		PREB	161	-34.28	20	70	85		0.803326	0.00911066
mmu-miR-149-3p		circ_779	172	-35.22	19	78.95	84.21		SH3RF1	168	-31.03	22	72.73	77.27		0.712039	0.0314
mmu-miR-149-3p		circ_779	172	-35.22	19	78.95	84.21		CCBE1	175	-36.06	19	84.21	84.21		0.803326	0.00911066
mmu-miR-149-3p		circ_779	172	-35.22	19	78.95	84.21		WNK4	171	-35.8	21	76.19	80.95		0.730297	0.0254636
mmu-miR-149-3p		circ_779	172	-35.22	19	78.95	84.21		AUTS2	179	-45.26	19	84.21	89.47		0.730297	0.0254636
mmu-miR-149-3p		circ_779	172	-35.22	19	78.95	84.21		EPS8	175	-37.05	19	78.95	89.47		0.839841	0.00461137
mmu-miR-149-3p		circ_779	172	-35.22	19	78.95	84.21		CIAPIN1	166	-31.83	18	77.78	83.33		0.858099	0.00307611
mmu-miR-149-3p		circ_779	172	-35.22	19	78.95	84.21		E2F8	172	-36.51	22	72.73	81.82		0.803326	0.00911066
mmu-miR-149-3p		circ_779	172	-35.22	19	78.95	84.21		HIPK2	184	-42.24	19	89.47	89.47		0.712039	0.0314
mmu-miR-149-3p		circ_779	172	-35.22	19	78.95	84.21		ETV1	175	-36.58	19	84.21	84.21		0.858099	0.00307611
mmu-miR-149-3p		circ_779	172	-35.22	19	78.95	84.21		EPAS1	175	-36.5	19	78.95	89.47		0.858099	0.00307611
mmu-miR-149-3p		circ_779	172	-35.22	19	78.95	84.21		FAM169B	167	-34.5	19	73.68	84.21		0.803326	0.00911066
mmu-miR-149-3p		circ_1426	170	-34.05	18	77.78	88.89		FGF10	170	-33.69	18	77.78	88.89		0.785069	0.0121946
mmu-miR-149-3p		circ_1426	170	-34.05	18	77.78	88.89		DCBLD2	172	-40.42	21	71.43	85.71		0.785069	0.0121946
mmu-miR-149-3p		circ_1426	170	-34.05	18	77.78	88.89		FMNL2	166	-38.75	19	78.95	78.95		0.785069	0.0121946
mmu-miR-149-3p		circ_1426	170	-34.05	18	77.78	88.89		ADCY8	168	-34.25	20	70	85		0.894614	0.00112701
mmu-miR-149-3p		circ_1426	170	-34.05	18	77.78	88.89		KNOP1	171	-37.7	19	78.95	84.21		0.785069	0.0121946
mmu-miR-149-3p		circ_1426	170	-34.05	18	77.78	88.89		HEATR1	166	-34.62	20	75	80		0.748554	0.0203173
mmu-miR-149-3p		circ_1426	170	-34.05	18	77.78	88.89		GRIA1	164	-37.78	19	73.68	78.95		0.748554	0.0203173
mmu-miR-149-3p		circ_1426	170	-34.05	18	77.78	88.89		MAP3K14	176	-38.53	22	77.27	81.82		0.785069	0.0121946
mmu-miR-149-3p		circ_1426	170	-34.05	18	77.78	88.89		SERPINE2	172	-35.22	19	78.95	84.21		0.785069	0.0121946
mmu-miR-149-3p		circ_1426	170	-34.05	18	77.78	88.89		HLF	167	-35.86	19	73.68	84.21		0.785069	0.0121946
mmu-miR-149-3p		circ_1426	170	-34.05	18	77.78	88.89		FRRS1	175	-37.3	19	84.21	84.21		0.730297	0.0254636
mmu-miR-149-3p		circ_1426	170	-34.05	18	77.78	88.89		KLRA2	173	-37.05	18	83.33	88.89		0.785069	0.0121946
mmu-miR-149-3p		circ_1426	170	-34.05	18	77.78	88.89		JADE2	176	-43.37	22	77.27	81.82		0.803326	0.00911066
mmu-miR-149-3p		circ_1426	170	-34.05	18	77.78	88.89		PRMT3	165	-32.62	20	75	80		0.803326	0.00911066
mmu-miR-149-3p		circ_1426	170	-34.05	18	77.78	88.89		ANTXR2	171	-36.91	25	76	76		0.803326	0.00911066
mmu-miR-149-3p		circ_1426	170	-34.05	18	77.78	88.89		LDLRAP1	171	-37.61	21	71.43	85.71		0.785069	0.0121946
mmu-miR-149-3p		circ_1426	170	-34.05	18	77.78	88.89		NUFIP1	161	-34.18	19	73.68	84.21		0.748554	0.0203173
mmu-miR-149-3p		circ_1426	170	-34.05	18	77.78	88.89		LIMK1	166	-30.08	19	73.68	84.21		0.839841	0.00461137
mmu-miR-149-3p		circ_1426	170	-34.05	18	77.78	88.89		PREB	161	-34.28	20	70	85		0.785069	0.0121946
mmu-miR-149-3p		circ_1426	170	-34.05	18	77.78	88.89		CCBE1	175	-36.06	19	84.21	84.21		0.785069	0.0121946
mmu-miR-149-3p		circ_1426	170	-34.05	18	77.78	88.89		WNK4	171	-35.8	21	76.19	80.95		0.912871	0.000589839
mmu-miR-149-3p		circ_1426	170	-34.05	18	77.78	88.89		EPS8	175	-37.05	19	78.95	89.47		0.803326	0.00911066
mmu-miR-149-3p		circ_1426	170	-34.05	18	77.78	88.89		CIAPIN1	166	-31.83	18	77.78	83.33		0.839841	0.00461137
mmu-miR-149-3p		circ_1426	170	-34.05	18	77.78	88.89		E2F8	172	-36.51	22	72.73	81.82		0.785069	0.0121946
mmu-miR-149-3p		circ_1426	170	-34.05	18	77.78	88.89		ETV1	175	-36.58	19	84.21	84.21		0.785069	0.0121946
mmu-miR-149-3p		circ_1426	170	-34.05	18	77.78	88.89		EPAS1	175	-36.5	19	78.95	89.47		0.785069	0.0121946
mmu-miR-149-3p		circ_1426	170	-34.05	18	77.78	88.89		FAM169B	167	-34.5	19	73.68	84.21		0.785069	0.0121946
mmu-miR-149-3p		circ_2201	161	-30.35	18	72.22	83.33		FGF10	170	-33.69	18	77.78	88.89		0.711967	0.0314253
mmu-miR-149-3p		circ_2201	161	-30.35	18	72.22	83.33		DCBLD2	172	-40.42	21	71.43	85.71		0.779773	0.0132052
mmu-miR-149-3p		circ_2201	161	-30.35	18	72.22	83.33		FMNL2	166	-38.75	19	78.95	78.95		0.728918	0.0258836
mmu-miR-149-3p		circ_2201	161	-30.35	18	72.22	83.33		KNOP1	171	-37.7	19	78.95	84.21		0.762821	0.016814
mmu-miR-149-3p		circ_2201	161	-30.35	18	72.22	83.33		HEATR1	166	-34.62	20	75	80		0.74587	0.0210263
mmu-miR-149-3p		circ_2201	161	-30.35	18	72.22	83.33		GRIA1	164	-37.78	19	73.68	78.95		0.813676	0.00762197
mmu-miR-149-3p		circ_2201	161	-30.35	18	72.22	83.33		HLF	167	-35.86	19	73.68	84.21		0.779773	0.0132052
mmu-miR-149-3p		circ_2201	161	-30.35	18	72.22	83.33		RBPMS	163	-30.77	20	70	80		0.711967	0.0314253
mmu-miR-149-3p		circ_2201	161	-30.35	18	72.22	83.33		FRRS1	175	-37.3	19	84.21	84.21		0.864531	0.00263237
mmu-miR-149-3p		circ_2201	161	-30.35	18	72.22	83.33		JADE2	176	-43.37	22	77.27	81.82		0.74587	0.0210263
mmu-miR-149-3p		circ_2201	161	-30.35	18	72.22	83.33		PRMT3	165	-32.62	20	75	80		0.813676	0.00762197
mmu-miR-149-3p		circ_2201	161	-30.35	18	72.22	83.33		ANTXR2	171	-36.91	25	76	76		0.728918	0.0258836
mmu-miR-149-3p		circ_2201	161	-30.35	18	72.22	83.33		LIMK1	166	-30.08	19	73.68	84.21		0.74587	0.0210263
mmu-miR-149-3p		circ_2201	161	-30.35	18	72.22	83.33		PREB	161	-34.28	20	70	85		0.711967	0.0314253
mmu-miR-149-3p		circ_2201	161	-30.35	18	72.22	83.33		SH3RF1	168	-31.03	22	72.73	77.27		0.711967	0.0314253
mmu-miR-149-3p		circ_2201	161	-30.35	18	72.22	83.33		CCBE1	175	-36.06	19	84.21	84.21		0.779773	0.0132052
mmu-miR-149-3p		circ_2201	161	-30.35	18	72.22	83.33		WNK4	171	-35.8	21	76.19	80.95		0.830628	0.00555542
mmu-miR-149-3p		circ_2201	161	-30.35	18	72.22	83.33		EPS8	175	-37.05	19	78.95	89.47		0.762821	0.016814
mmu-miR-149-3p		circ_2201	161	-30.35	18	72.22	83.33		E2F8	172	-36.51	22	72.73	81.82		0.711967	0.0314253
mmu-miR-149-3p		circ_2201	161	-30.35	18	72.22	83.33		HIPK2	184	-42.24	19	89.47	89.47		0.711967	0.0314253
mmu-miR-149-3p		circ_2201	161	-30.35	18	72.22	83.33		EPAS1	175	-36.5	19	78.95	89.47		0.728918	0.0258836
mmu-miR-149-3p		circ_1097	175	-37.3	19	84.21	84.21		FGF10	170	-33.69	18	77.78	88.89		0.711967	0.0314253
mmu-miR-149-3p		circ_1097	175	-37.3	19	84.21	84.21		DCBLD2	172	-40.42	21	71.43	85.71		0.762821	0.016814
mmu-miR-149-3p		circ_1097	175	-37.3	19	84.21	84.21		FMNL2	166	-38.75	19	78.95	78.95		0.847579	0.00390855
mmu-miR-149-3p		circ_1097	175	-37.3	19	84.21	84.21		MAP3K14	176	-38.53	22	77.27	81.82		0.796725	0.0101563
mmu-miR-149-3p		circ_1097	175	-37.3	19	84.21	84.21		SERPINE2	172	-35.22	19	78.95	84.21		0.74587	0.0210263
mmu-miR-149-3p		circ_1097	175	-37.3	19	84.21	84.21		HLF	167	-35.86	19	73.68	84.21		0.762821	0.016814
mmu-miR-149-3p		circ_1097	175	-37.3	19	84.21	84.21		PRMT3	165	-32.62	20	75	80		0.711967	0.0314253
mmu-miR-149-3p		circ_1097	175	-37.3	19	84.21	84.21		NUFIP1	161	-34.18	19	73.68	84.21		0.728918	0.0258836
mmu-miR-149-3p		circ_1097	175	-37.3	19	84.21	84.21		PLEKHM1	164	-37.11	21	71.43	76.19		0.881483	0.00167742
mmu-miR-149-3p		circ_1097	175	-37.3	19	84.21	84.21		PREB	161	-34.28	20	70	85		0.711967	0.0314253
mmu-miR-149-3p		circ_1097	175	-37.3	19	84.21	84.21		CCBE1	175	-36.06	19	84.21	84.21		0.762821	0.016814
mmu-miR-149-3p		circ_1097	175	-37.3	19	84.21	84.21		AUTS2	179	-45.26	19	84.21	89.47		0.796725	0.0101563
mmu-miR-149-3p		circ_1097	175	-37.3	19	84.21	84.21		EPS8	175	-37.05	19	78.95	89.47		0.796725	0.0101563
mmu-miR-149-3p		circ_1097	175	-37.3	19	84.21	84.21		CIAPIN1	166	-31.83	18	77.78	83.33		0.711967	0.0314253
mmu-miR-149-3p		circ_1097	175	-37.3	19	84.21	84.21		E2F8	172	-36.51	22	72.73	81.82		0.711967	0.0314253
mmu-miR-149-3p		circ_1097	175	-37.3	19	84.21	84.21		ETV1	175	-36.58	19	84.21	84.21		0.796725	0.0101563
mmu-miR-149-3p		circ_1097	175	-37.3	19	84.21	84.21		EPAS1	175	-36.5	19	78.95	89.47		0.847579	0.00390855
mmu-miR-149-3p		circ_1804	175	-37.3	19	84.21	84.21		FGF10	170	-33.69	18	77.78	88.89		0.783349	0.0125168
mmu-miR-149-3p		circ_1804	175	-37.3	19	84.21	84.21		DCBLD2	172	-40.42	21	71.43	85.71		0.783349	0.0125168
mmu-miR-149-3p		circ_1804	175	-37.3	19	84.21	84.21		FMNL2	166	-38.75	19	78.95	78.95		0.861684	0.00282288
mmu-miR-149-3p		circ_1804	175	-37.3	19	84.21	84.21		ADCY8	168	-34.25	20	70	85		0.792053	0.0109431
mmu-miR-149-3p		circ_1804	175	-37.3	19	84.21	84.21		KNOP1	171	-37.7	19	78.95	84.21		0.800757	0.00950848
mmu-miR-149-3p		circ_1804	175	-37.3	19	84.21	84.21		HEATR1	166	-34.62	20	75	80		0.748534	0.0203226
mmu-miR-149-3p		circ_1804	175	-37.3	19	84.21	84.21		GRIA1	164	-37.78	19	73.68	78.95		0.748534	0.0203226
mmu-miR-149-3p		circ_1804	175	-37.3	19	84.21	84.21		MAP3K14	176	-38.53	22	77.27	81.82		0.861684	0.00282288
mmu-miR-149-3p		circ_1804	175	-37.3	19	84.21	84.21		SERPINE2	172	-35.22	19	78.95	84.21		0.861684	0.00282288
mmu-miR-149-3p		circ_1804	175	-37.3	19	84.21	84.21		HLF	167	-35.86	19	73.68	84.21		0.783349	0.0125168
mmu-miR-149-3p		circ_1804	175	-37.3	19	84.21	84.21		FRRS1	175	-37.3	19	84.21	84.21		0.757238	0.0181328
mmu-miR-149-3p		circ_1804	175	-37.3	19	84.21	84.21		JADE2	176	-43.37	22	77.27	81.82		0.818165	0.00703117
mmu-miR-149-3p		circ_1804	175	-37.3	19	84.21	84.21		PRMT3	165	-32.62	20	75	80		0.818165	0.00703117
mmu-miR-149-3p		circ_1804	175	-37.3	19	84.21	84.21		LDLRAP1	171	-37.61	21	71.43	85.71		0.783349	0.0125168
mmu-miR-149-3p		circ_1804	175	-37.3	19	84.21	84.21		NUFIP1	161	-34.18	19	73.68	84.21		0.731126	0.025213
mmu-miR-149-3p		circ_1804	175	-37.3	19	84.21	84.21		PLEKHM1	164	-37.11	21	71.43	76.19		0.800757	0.00950848
mmu-miR-149-3p		circ_1804	175	-37.3	19	84.21	84.21		LIMK1	166	-30.08	19	73.68	84.21		0.748534	0.0203226
mmu-miR-149-3p		circ_1804	175	-37.3	19	84.21	84.21		PREB	161	-34.28	20	70	85		0.783349	0.0125168
mmu-miR-149-3p		circ_1804	175	-37.3	19	84.21	84.21		CCBE1	175	-36.06	19	84.21	84.21		0.783349	0.0125168
mmu-miR-149-3p		circ_1804	175	-37.3	19	84.21	84.21		WNK4	171	-35.8	21	76.19	80.95		0.826869	0.00597575
mmu-miR-149-3p		circ_1804	175	-37.3	19	84.21	84.21		AUTS2	179	-45.26	19	84.21	89.47		0.748534	0.0203226
mmu-miR-149-3p		circ_1804	175	-37.3	19	84.21	84.21		EPS8	175	-37.05	19	78.95	89.47		0.8965	0.00105998
mmu-miR-149-3p		circ_1804	175	-37.3	19	84.21	84.21		CIAPIN1	166	-31.83	18	77.78	83.33		0.800757	0.00950848
mmu-miR-149-3p		circ_1804	175	-37.3	19	84.21	84.21		E2F8	172	-36.51	22	72.73	81.82		0.783349	0.0125168
mmu-miR-149-3p		circ_1804	175	-37.3	19	84.21	84.21		ETV1	175	-36.58	19	84.21	84.21		0.861684	0.00282288
mmu-miR-149-3p		circ_1804	175	-37.3	19	84.21	84.21		EPAS1	175	-36.5	19	78.95	89.47		0.861684	0.00282288
mmu-miR-149-3p		circ_1804	175	-37.3	19	84.21	84.21		FAM169B	167	-34.5	19	73.68	84.21		0.783349	0.0125168
mmu-miR-149-3p		circ_915	171	-33.79	18	83.33	83.33		FGF10	170	-33.69	18	77.78	88.89		0.800757	0.00950848
mmu-miR-149-3p		circ_915	171	-33.79	18	83.33	83.33		DCBLD2	172	-40.42	21	71.43	85.71		0.800757	0.00950848
mmu-miR-149-3p		circ_915	171	-33.79	18	83.33	83.33		FMNL2	166	-38.75	19	78.95	78.95		0.861684	0.00282288
mmu-miR-149-3p		circ_915	171	-33.79	18	83.33	83.33		ADCY8	168	-34.25	20	70	85		0.826869	0.00597575
mmu-miR-149-3p		circ_915	171	-33.79	18	83.33	83.33		KNOP1	171	-37.7	19	78.95	84.21		0.800757	0.00950848
mmu-miR-149-3p		circ_915	171	-33.79	18	83.33	83.33		HEATR1	166	-34.62	20	75	80		0.835573	0.00503382
mmu-miR-149-3p		circ_915	171	-33.79	18	83.33	83.33		GRIA1	164	-37.78	19	73.68	78.95		0.835573	0.00503382
mmu-miR-149-3p		circ_915	171	-33.79	18	83.33	83.33		MAP3K14	176	-38.53	22	77.27	81.82		0.861684	0.00282288
mmu-miR-149-3p		circ_915	171	-33.79	18	83.33	83.33		SERPINE2	172	-35.22	19	78.95	84.21		0.861684	0.00282288
mmu-miR-149-3p		circ_915	171	-33.79	18	83.33	83.33		HLF	167	-35.86	19	73.68	84.21		0.800757	0.00950848
mmu-miR-149-3p		circ_915	171	-33.79	18	83.33	83.33		RBPMS	163	-30.77	20	70	80		0.705015	0.0339046
mmu-miR-149-3p		circ_915	171	-33.79	18	83.33	83.33		FRRS1	175	-37.3	19	84.21	84.21		0.757238	0.0181328
mmu-miR-149-3p		circ_915	171	-33.79	18	83.33	83.33		KLRA2	173	-37.05	18	83.33	88.89		0.835573	0.00503382
mmu-miR-149-3p		circ_915	171	-33.79	18	83.33	83.33		JADE2	176	-43.37	22	77.27	81.82		0.783349	0.0125168
mmu-miR-149-3p		circ_915	171	-33.79	18	83.33	83.33		PRMT3	165	-32.62	20	75	80		0.783349	0.0125168
mmu-miR-149-3p		circ_915	171	-33.79	18	83.33	83.33		ANTXR2	171	-36.91	25	76	76		0.818165	0.00703117
mmu-miR-149-3p		circ_915	171	-33.79	18	83.33	83.33		LDLRAP1	171	-37.61	21	71.43	85.71		0.800757	0.00950848
mmu-miR-149-3p		circ_915	171	-33.79	18	83.33	83.33		NUFIP1	161	-34.18	19	73.68	84.21		0.835573	0.00503382
mmu-miR-149-3p		circ_915	171	-33.79	18	83.33	83.33		PLEKHM1	164	-37.11	21	71.43	76.19		0.783349	0.0125168
mmu-miR-149-3p		circ_915	171	-33.79	18	83.33	83.33		LIMK1	166	-30.08	19	73.68	84.21		0.783349	0.0125168
mmu-miR-149-3p		circ_915	171	-33.79	18	83.33	83.33		PREB	161	-34.28	20	70	85		0.800757	0.00950848
mmu-miR-149-3p		circ_915	171	-33.79	18	83.33	83.33		SH3RF1	168	-31.03	22	72.73	77.27		0.705015	0.0339046
mmu-miR-149-3p		circ_915	171	-33.79	18	83.33	83.33		CCBE1	175	-36.06	19	84.21	84.21		0.800757	0.00950848
mmu-miR-149-3p		circ_915	171	-33.79	18	83.33	83.33		WNK4	171	-35.8	21	76.19	80.95		0.809461	0.0082066
mmu-miR-149-3p		circ_915	171	-33.79	18	83.33	83.33		AUTS2	179	-45.26	19	84.21	89.47		0.731126	0.025213
mmu-miR-149-3p		circ_915	171	-33.79	18	83.33	83.33		EPS8	175	-37.05	19	78.95	89.47		0.844277	0.0041988
mmu-miR-149-3p		circ_915	171	-33.79	18	83.33	83.33		CIAPIN1	166	-31.83	18	77.78	83.33		0.940019	0.000164049
mmu-miR-149-3p		circ_915	171	-33.79	18	83.33	83.33		E2F8	172	-36.51	22	72.73	81.82		0.800757	0.00950848
mmu-miR-149-3p		circ_915	171	-33.79	18	83.33	83.33		HIPK2	184	-42.24	19	89.47	89.47		0.705015	0.0339046
mmu-miR-149-3p		circ_915	171	-33.79	18	83.33	83.33		ETV1	175	-36.58	19	84.21	84.21		0.861684	0.00282288
mmu-miR-149-3p		circ_915	171	-33.79	18	83.33	83.33		EPAS1	175	-36.5	19	78.95	89.47		0.861684	0.00282288
mmu-miR-149-3p		circ_915	171	-33.79	18	83.33	83.33		FAM169B	167	-34.5	19	73.68	84.21		0.800757	0.00950848
mmu-miR-1894-5p		circ_2313	163	-35.37	20	70	80		SOX4	160	-30.84	21	71.43	71.43		0.779773	0.0132052
mmu-miR-1894-5p		circ_2313	163	-35.37	20	70	80		KCNK2	168	-32.01	22	72.73	77.27		0.762821	0.016814
mmu-miR-1894-5p		circ_2400	171	-30.42	20	80	80		KCNK2	168	-32.01	22	72.73	77.27		0.752512	0.0193012
mmu-miR-1894-5p		circ_1983	184	-36.71	21	85.71	85.71		SOX4	160	-30.84	21	71.43	71.43		0.8	0.0138283
mmu-miR-1894-5p		circ_1983	184	-36.71	21	85.71	85.71		KCNK2	168	-32.01	22	72.73	77.27		0.9	0.00202822
mmu-miR-1930-3p		circ_1804	167	-30.67	22	77.27	77.27		LTV1	175	-30.81	21	76.19	85.71		0.713718	0.0308198
mmu-miR-1946a		circ_1097	196	-45.78	24	83.33	87.5		TRAK2	174	-33.35	18	83.33	88.89		0.796725	0.0101563
mmu-miR-1946a		circ_1097	196	-45.78	24	83.33	87.5		IFI204	208	-51.23	26	88.46	88.46		0.813676	0.00762197
mmu-miR-1946a		circ_1097	196	-45.78	24	83.33	87.5		PLCE1	179	-31.99	26	73.08	76.92		0.711967	0.0314253
mmu-miR-1946a		circ_1097	196	-45.78	24	83.33	87.5		PFAS	188	-41.2	24	79.17	83.33		0.711967	0.0314253
mmu-miR-1946a		circ_1097	196	-45.78	24	83.33	87.5		SQRDL	180	-31.87	28	71.43	75		0.762821	0.016814
mmu-miR-1946a		circ_1804	200	-46.72	26	84.62	84.62		IFI204	208	-51.23	26	88.46	88.46		0.870388	0.0022686
mmu-miR-1946a		circ_1804	200	-46.72	26	84.62	84.62		DDX54	166	-33.15	20	75	80		0.783349	0.0125168
mmu-miR-1946a		circ_1804	200	-46.72	26	84.62	84.62		FAH	183	-33.29	24	79.17	79.17		0.800757	0.00950848
mmu-miR-1946a		circ_1804	200	-46.72	26	84.62	84.62		PLCE1	179	-31.99	26	73.08	76.92		0.818165	0.00703117
mmu-miR-1946a		circ_1804	200	-46.72	26	84.62	84.62		PFAS	188	-41.2	24	79.17	83.33		0.783349	0.0125168
mmu-miR-1946a		circ_1804	200	-46.72	26	84.62	84.62		FBL	180	-31.18	26	73.08	76.92		0.835573	0.00503382
mmu-miR-1946a		circ_1804	200	-46.72	26	84.62	84.62		RRAS2	189	-35.73	30	73.33	76.67		0.922612	0.000393338
mmu-miR-1946a		circ_1804	200	-46.72	26	84.62	84.62		SQRDL	180	-31.87	28	71.43	75		0.835573	0.00503382
mmu-miR-1946a		circ_2400	195	-43.42	25	80	88		DDX54	166	-33.15	20	75	80		0.703005	0.0346443
mmu-miR-1946a		circ_2313	204	-50.07	24	87.5	91.67		TRAK2	174	-33.35	18	83.33	88.89		0.813676	0.00762197
mmu-miR-1946a		circ_2313	204	-50.07	24	87.5	91.67		SH3RF1	213	-55.15	24	91.67	95.83		0.779773	0.0132052
mmu-miR-1946a		circ_2313	204	-50.07	24	87.5	91.67		IFI204	208	-51.23	26	88.46	88.46		0.779773	0.0132052
mmu-miR-1946a		circ_2313	204	-50.07	24	87.5	91.67		DDX54	166	-33.15	20	75	80		0.813676	0.00762197
mmu-miR-1946a		circ_2313	204	-50.07	24	87.5	91.67		FAH	183	-33.29	24	79.17	79.17		0.915386	0.000533717
mmu-miR-1946a		circ_2313	204	-50.07	24	87.5	91.67		PLCE1	179	-31.99	26	73.08	76.92		0.864531	0.00263237
mmu-miR-1946a		circ_2313	204	-50.07	24	87.5	91.67		PFAS	188	-41.2	24	79.17	83.33		0.830628	0.00555542
mmu-miR-1946a		circ_2313	204	-50.07	24	87.5	91.67		FBL	180	-31.18	26	73.08	76.92		0.762821	0.016814
mmu-miR-1946a		circ_2313	204	-50.07	24	87.5	91.67		RRAS2	189	-35.73	30	73.33	76.67		0.864531	0.00263237
mmu-miR-1946a		circ_2313	204	-50.07	24	87.5	91.67		SQRDL	180	-31.87	28	71.43	75		0.813676	0.00762197
mmu-miR-1946a		circ_93	192	-43.49	24	79.17	87.5		TRAK2	174	-33.35	18	83.33	88.89		0.839841	0.00461137
mmu-miR-1946a		circ_93	192	-43.49	24	79.17	87.5		SH3RF1	213	-55.15	24	91.67	95.83		0.712039	0.0314
mmu-miR-1946a		circ_93	192	-43.49	24	79.17	87.5		IFI204	208	-51.23	26	88.46	88.46		0.894614	0.00112701
mmu-miR-1946a		circ_93	192	-43.49	24	79.17	87.5		DDX54	166	-33.15	20	75	80		0.730297	0.0254636
mmu-miR-1946a		circ_93	192	-43.49	24	79.17	87.5		FAH	183	-33.29	24	79.17	79.17		0.803326	0.00911066
mmu-miR-1946a		circ_93	192	-43.49	24	79.17	87.5		PLCE1	179	-31.99	26	73.08	76.92		0.785069	0.0121946
mmu-miR-1946a		circ_93	192	-43.49	24	79.17	87.5		PFAS	188	-41.2	24	79.17	83.33		0.803326	0.00911066
mmu-miR-1946a		circ_93	192	-43.49	24	79.17	87.5		FBL	180	-31.18	26	73.08	76.92		0.839841	0.00461137
mmu-miR-1946a		circ_93	192	-43.49	24	79.17	87.5		RRAS2	189	-35.73	30	73.33	76.67		0.858099	0.00307611
mmu-miR-1946a		circ_93	192	-43.49	24	79.17	87.5		SQRDL	180	-31.87	28	71.43	75		0.912871	0.000589839
mmu-miR-1946b		circ_1804	191	-41.12	25	80	84		DDX54	167	-32.26	22	72.73	77.27		0.783349	0.0125168
mmu-miR-1946b		circ_1804	191	-41.12	25	80	84		LIMK1	171	-34.65	24	70.83	75		0.748534	0.0203226
mmu-miR-1946b		circ_1804	191	-41.12	25	80	84		IFI204	199	-45.63	25	84	88		0.870388	0.0022686
mmu-miR-1946b		circ_1804	191	-41.12	25	80	84		RBM19	178	-36.47	26	73.08	76.92		0.783349	0.0125168
mmu-miR-1946b		circ_1804	191	-41.12	25	80	84		ADAMTS9	171	-31.34	25	72	72		0.731126	0.025213
mmu-miR-1946b		circ_1804	191	-41.12	25	80	84		TUT1	181	-34.42	23	78.26	82.61		0.800757	0.00950848
mmu-miR-1946b		circ_1804	191	-41.12	25	80	84		ATG7	179	-35.05	23	73.91	82.61		0.73983	0.0226809
mmu-miR-1946b		circ_1804	191	-41.12	25	80	84		PPIF	180	-31.56	24	79.17	79.17		0.713718	0.0308198
mmu-miR-1946b		circ_1804	191	-41.12	25	80	84		SEMA4B	212	-57.44	23	91.3	100		0.818165	0.00703117
mmu-miR-1966-5p		circ_1804	171	-31.93	20	75	85		MYO18A	181	-31.13	23	78.26	82.61		0.748534	0.0203226
mmu-miR-1966-5p		circ_1804	171	-31.93	20	75	85		FGFR1	172	-33.08	20	75	85		0.783349	0.0125168
mmu-miR-1966-5p		circ_1804	171	-31.93	20	75	85		MAP4K4	182	-34.04	24	79.17	79.17		0.713718	0.0308198
mmu-miR-1966-5p		circ_1804	171	-31.93	20	75	85		HHIPL1	177	-36.17	26	73.08	80.77		0.731126	0.025213
mmu-miR-1966-5p		circ_1804	171	-31.93	20	75	85		BCL2	166	-32.69	19	73.68	84.21		0.783349	0.0125168
mmu-miR-1970		circ_779	181	-32.94	22	81.82	81.82		DRAM1	176	-31.27	19	78.95	89.47		0.894614	0.00112701
mmu-miR-1970		circ_779	181	-32.94	22	81.82	81.82		POLR1B	172	-33.84	22	72.73	81.82		0.858099	0.00307611
mmu-miR-1970		circ_779	181	-32.94	22	81.82	81.82		ERMP1	181	-31.18	22	81.82	81.82		0.839841	0.00461137
mmu-miR-1970		circ_779	181	-32.94	22	81.82	81.82		PLCE1	179	-31.36	20	80	90		0.785069	0.0121946
mmu-miR-1970		circ_779	181	-32.94	22	81.82	81.82		SERPINE2	181	-32.94	22	81.82	81.82		0.858099	0.00307611
mmu-miR-1970		circ_1983	192	-36.29	21	90.48	90.48		DRAM1	176	-31.27	19	78.95	89.47		0.783333	0.0172233
mmu-miR-1970		circ_1983	192	-36.29	21	90.48	90.48		POLR1B	172	-33.84	22	72.73	81.82		0.816667	0.0107694
mmu-miR-1970		circ_1983	192	-36.29	21	90.48	90.48		ERMP1	181	-31.18	22	81.82	81.82		0.716667	0.0368662
mmu-miR-1970		circ_1983	192	-36.29	21	90.48	90.48		PLCE1	179	-31.36	20	80	90		0.783333	0.0172233
mmu-miR-204-3p		circ_1078	179	-33.01	18	83.33	94.44		TMA16	167	-30.3	18	77.78	83.33		0.839841	0.00461137
mmu-miR-3072-5p		circ_2201	180	-39.13	21	80.95	85.71		PIK3R5	160	-30.71	20	70	75		0.796725	0.0101563
mmu-miR-3072-5p		circ_2201	180	-39.13	21	80.95	85.71		MTMR10	171	-30.24	21	71.43	85.71		0.779773	0.0132052
mmu-miR-3072-5p		circ_2201	180	-39.13	21	80.95	85.71		BGN	171	-35.15	20	80	80		0.728918	0.0258836
mmu-miR-3072-5p		circ_2201	180	-39.13	21	80.95	85.71		PCBP3	160	-39.75	20	70	75		0.74587	0.0210263
mmu-miR-3076-5p		circ_1078	165	-33.79	27	70.37	70.37		XPR1	167	-34.66	24	75	75		0.858099	0.00307611
mmu-miR-3076-5p		circ_1078	165	-33.79	27	70.37	70.37		MRVI1	172	-37.73	21	76.19	80.95		0.858099	0.00307611
mmu-miR-3076-5p		circ_1078	165	-33.79	27	70.37	70.37		AHCYL1	177	-33.33	23	78.26	78.26		0.858099	0.00307611
mmu-miR-3076-5p		circ_1078	165	-33.79	27	70.37	70.37		PLEKHM1	176	-31.16	23	78.26	78.26		0.712039	0.0314
mmu-miR-3076-5p		circ_1078	165	-33.79	27	70.37	70.37		ITPRIPL2	174	-31.29	21	76.19	80.95		0.839841	0.00461137
mmu-miR-3076-5p		circ_1078	165	-33.79	27	70.37	70.37		PHC2	170	-32.37	23	73.91	73.91		0.858099	0.00307611
mmu-miR-3077-5p		circ_780	170	-34.69	21	71.43	80.95		TGFBR1	182	-43.09	25	76	80		0.803326	0.00911066
mmu-miR-3077-5p		circ_780	170	-34.69	21	71.43	80.95		E2F8	179	-43.75	24	70.83	83.33		0.785069	0.0121946
mmu-miR-3077-5p		circ_780	170	-34.69	21	71.43	80.95		H2AFJ	188	-47.67	21	85.71	90.48		0.858099	0.00307611
mmu-miR-3089-5p		circ_1983	176	-30.1	20	80	85		FGFR1	176	-30.68	20	80	85		0.766667	0.02139
mmu-miR-3089-5p		circ_1983	176	-30.1	20	80	85		IL6RA	180	-31.93	21	80.95	85.71		0.766667	0.02139
mmu-miR-3089-5p		circ_1983	176	-30.1	20	80	85		WDR12	176	-32.09	20	80	85		0.783333	0.0172233
mmu-miR-3089-5p		circ_1983	176	-30.1	20	80	85		PML	176	-30.68	20	80	85		0.766667	0.02139
mmu-miR-3089-5p		circ_1983	176	-30.1	20	80	85		IFI204	176	-30.68	20	80	85		0.9	0.00202822
mmu-miR-3089-5p		circ_1492	176	-30.68	20	80	85		FGFR1	176	-30.68	20	80	85		0.803326	0.00911066
mmu-miR-3089-5p		circ_1492	176	-30.68	20	80	85		IL6RA	180	-31.93	21	80.95	85.71		0.803326	0.00911066
mmu-miR-3089-5p		circ_1492	176	-30.68	20	80	85		WDR12	176	-32.09	20	80	85		0.894614	0.00112701
mmu-miR-3089-5p		circ_1492	176	-30.68	20	80	85		PML	176	-30.68	20	80	85		0.803326	0.00911066
mmu-miR-3089-5p		circ_1492	176	-30.68	20	80	85		IFI204	176	-30.68	20	80	85		0.894614	0.00112701
mmu-miR-3089-5p		circ_1804	176	-30.68	20	80	85		FGFR1	176	-30.68	20	80	85		0.783349	0.0125168
mmu-miR-3089-5p		circ_1804	176	-30.68	20	80	85		IL6RA	180	-31.93	21	80.95	85.71		0.783349	0.0125168
mmu-miR-3089-5p		circ_1804	176	-30.68	20	80	85		WDR12	176	-32.09	20	80	85		0.870388	0.0022686
mmu-miR-3089-5p		circ_1804	176	-30.68	20	80	85		PML	176	-30.68	20	80	85		0.783349	0.0125168
mmu-miR-3089-5p		circ_1804	176	-30.68	20	80	85		IFI204	176	-30.68	20	80	85		0.870388	0.0022686
mmu-miR-30b-3p		circ_779	179	-33.89	20	80	90		IDO2	164	-31.73	20	70	80		0.730297	0.0254636
mmu-miR-3102-5p		circ_265	166	-32.02	21	71.43	80.95		RRAS2	171	-38.54	19	78.95	84.21		0.85	0.00607363
mmu-miR-3103-5p		circ_1492	162	-30.66	21	71.43	76.19		AMOTL1	175	-30.6	21	76.19	85.71		0.785069	0.0121946
mmu-miR-3103-5p		circ_1492	162	-30.66	21	71.43	76.19		ELOVL6	162	-30.76	21	71.43	80.95		0.858099	0.00307611
mmu-miR-3103-5p		circ_1492	162	-30.66	21	71.43	76.19		BCL2L1	171	-34.08	19	78.95	84.21		0.785069	0.0121946
mmu-miR-3104-5p		circ_265	171	-32.02	19	78.95	84.21		ETV4	165	-31.66	22	72.73	72.73		0.783333	0.0172233
mmu-miR-3104-5p		circ_265	171	-32.02	19	78.95	84.21		FAM63A	179	-34.22	19	84.21	89.47		0.783333	0.0172233
mmu-miR-3104-5p		circ_265	171	-32.02	19	78.95	84.21		LBR	178	-36.68	22	77.27	81.82		0.833333	0.0082672
mmu-miR-3110-3p		circ_915	164	-31.93	22	72.73	72.73		ZFP217	174	-31.24	19	84.21	84.21		0.783349	0.0125168
mmu-miR-3110-3p		circ_915	164	-31.93	22	72.73	72.73		TNFRSF1B	179	-31.69	19	84.21	89.47		0.783349	0.0125168
mmu-miR-3110-3p		circ_915	164	-31.93	22	72.73	72.73		KNOP1	177	-36.94	19	89.47	89.47		0.800757	0.00950848
mmu-miR-3110-3p		circ_915	164	-31.93	22	72.73	72.73		NEK7	175	-30.79	21	76.19	85.71		0.844277	0.0041988
mmu-miR-3110-3p		circ_915	164	-31.93	22	72.73	72.73		S1PR2	163	-30.39	22	72.73	72.73		0.800757	0.00950848
mmu-miR-3154		circ_946	171	-33.64	21	71.43	85.71		MYO18A	167	-30.61	21	71.43	80.95		0.858099	0.00307611
mmu-miR-3154		circ_946	171	-33.64	21	71.43	85.71		UTP18	176	-33.99	23	73.91	82.61		0.839841	0.00461137
mmu-miR-3154		circ_946	171	-33.64	21	71.43	85.71		A3GALT2	168	-32.69	20	70	85		0.858099	0.00307611
mmu-miR-3154		circ_946	171	-33.64	21	71.43	85.71		HECTD1	167	-34.39	22	72.73	77.27		0.894614	0.00112701
mmu-miR-3154		circ_946	171	-33.64	21	71.43	85.71		SORCS1	168	-37.08	21	76.19	76.19		0.858099	0.00307611
mmu-miR-3154		circ_946	171	-33.64	21	71.43	85.71		SYT12	174	-31.16	18	83.33	88.89		0.748554	0.0203173
mmu-miR-3154		circ_946	171	-33.64	21	71.43	85.71		PTGIR	170	-30.69	21	76.19	80.95		0.858099	0.00307611
mmu-miR-3154		circ_2313	167	-31.61	24	70.83	75		MYO18A	167	-30.61	21	71.43	80.95		0.779773	0.0132052
mmu-miR-3154		circ_2313	167	-31.61	24	70.83	75		UTP18	176	-33.99	23	73.91	82.61		0.728918	0.0258836
mmu-miR-3154		circ_2313	167	-31.61	24	70.83	75		A3GALT2	168	-32.69	20	70	85		0.881483	0.00167742
mmu-miR-3154		circ_2313	167	-31.61	24	70.83	75		HECTD1	167	-34.39	22	72.73	77.27		0.864531	0.00263237
mmu-miR-3154		circ_2313	167	-31.61	24	70.83	75		SORCS1	168	-37.08	21	76.19	76.19		0.830628	0.00555542
mmu-miR-3154		circ_2313	167	-31.61	24	70.83	75		SYT12	174	-31.16	18	83.33	88.89		0.864531	0.00263237
mmu-miR-3154		circ_2313	167	-31.61	24	70.83	75		PTGIR	170	-30.69	21	76.19	80.95		0.74587	0.0210263
mmu-miR-323-5p		circ_946	174	-30.8	18	83.33	88.89		MTHFD1	176	-33.14	22	77.27	81.82		0.858099	0.00307611
mmu-miR-323-5p		circ_946	174	-30.8	18	83.33	88.89		SEMA4B	172	-34.65	23	73.91	78.26		0.839841	0.00461137
mmu-miR-331-3p		circ_2567	171	-31.57	20	80	80		SOX4	174	-35.38	18	77.78	94.44		0.703005	0.0346443
mmu-miR-331-3p		circ_2567	171	-31.57	20	80	80		GRAMD4	165	-31.53	19	73.68	84.21		0.752512	0.0193012
mmu-miR-331-3p		circ_1983	171	-35.91	20	75	85		FMNL2	170	-30.26	18	77.78	88.89		0.8	0.0138283
mmu-miR-331-3p		circ_1983	171	-35.91	20	75	85		MAP3K14	166	-33.21	20	75	80		0.716667	0.0368662
mmu-miR-331-3p		circ_1983	171	-35.91	20	75	85		SOX4	174	-35.38	18	77.78	94.44		0.8	0.0138283
mmu-miR-331-3p		circ_1983	171	-35.91	20	75	85		GRAMD4	165	-31.53	19	73.68	84.21		0.8	0.0138283
mmu-miR-345-3p		circ_1983	162	-30.43	19	73.68	78.95		DHRS9	175	-30.64	19	84.21	84.21		0.816667	0.0107694
mmu-miR-346-3p		circ_1983	162	-31.95	23	73.91	73.91		WIPF1	167	-31.8	19	73.68	84.21		0.766667	0.02139
mmu-miR-346-3p		circ_1983	162	-31.95	23	73.91	73.91		TRIOBP	165	-31.14	19	78.95	78.95		0.766667	0.02139
mmu-miR-346-3p		circ_1983	162	-31.95	23	73.91	73.91		ZFP697	160	-33.12	22	77.27	77.27		0.833333	0.0082672
mmu-miR-346-3p		circ_1983	162	-31.95	23	73.91	73.91		CBX5	165	-32.31	21	76.19	80.95		0.716667	0.0368662
mmu-miR-346-3p		circ_1983	162	-31.95	23	73.91	73.91		IL12RB1	169	-31.58	19	78.95	84.21		0.9	0.00202822
mmu-miR-346-3p		circ_1983	162	-31.95	23	73.91	73.91		SIPA1L2	164	-32.27	20	70	80		0.766667	0.02139
mmu-miR-346-3p		circ_1983	162	-31.95	23	73.91	73.91		IDO2	168	-34.3	22	72.73	77.27		0.866667	0.00450838
mmu-miR-346-3p		circ_1983	162	-31.95	23	73.91	73.91		TIGD2	163	-30.06	21	71.43	76.19		0.816667	0.0107694
mmu-miR-346-3p		circ_1983	162	-31.95	23	73.91	73.91		2019-09-09	167	-30.39	20	75	80		0.8	0.0138283
mmu-miR-346-3p		circ_1983	162	-31.95	23	73.91	73.91		EPAS1	167	-35.65	21	76.19	76.19		0.8	0.0138283
mmu-miR-346-3p		circ_1983	162	-31.95	23	73.91	73.91		ZFP608	166	-32.25	22	72.73	77.27		0.816667	0.0107694
mmu-miR-346-3p		circ_1983	162	-31.95	23	73.91	73.91		VASP	165	-33.6	20	80	80		0.716667	0.0368662
mmu-miR-346-3p		circ_1983	162	-31.95	23	73.91	73.91		AMOTL1	168	-32.15	20	75	80		0.783333	0.0172233
mmu-miR-346-3p		circ_1983	162	-31.95	23	73.91	73.91		RRP9	178	-34.66	20	85	85		0.716667	0.0368662
mmu-miR-346-3p		circ_1983	162	-31.95	23	73.91	73.91		DPP9	162	-30.13	20	75	75		0.766667	0.02139
mmu-miR-346-3p		circ_1983	162	-31.95	23	73.91	73.91		SLC6A6	167	-32.47	21	76.19	76.19		0.766667	0.02139
mmu-miR-346-3p		circ_1983	162	-31.95	23	73.91	73.91		WNK4	161	-30.19	21	76.19	76.19		0.866667	0.00450838
mmu-miR-346-3p		circ_1983	162	-31.95	23	73.91	73.91		HHIP	160	-30.14	18	77.78	77.78		0.8	0.0138283
mmu-miR-346-3p		circ_1983	162	-31.95	23	73.91	73.91		PIK3R5	171	-31.16	19	78.95	84.21		0.833333	0.0082672
mmu-miR-346-3p		circ_1983	162	-31.95	23	73.91	73.91		PHC2	167	-30.7	21	76.19	76.19		0.783333	0.0172233
mmu-miR-346-3p		circ_1983	162	-31.95	23	73.91	73.91		IFI204	167	-31.18	18	77.78	83.33		0.9	0.00202822
mmu-miR-346-3p		circ_1804	167	-31.18	18	77.78	83.33		WIPF1	167	-31.8	19	73.68	84.21		0.783349	0.0125168
mmu-miR-346-3p		circ_1804	167	-31.18	18	77.78	83.33		TRIOBP	165	-31.14	19	78.95	78.95		0.870388	0.0022686
mmu-miR-346-3p		circ_1804	167	-31.18	18	77.78	83.33		ZFP697	160	-33.12	22	77.27	77.27		0.748534	0.0203226
mmu-miR-346-3p		circ_1804	167	-31.18	18	77.78	83.33		CBX5	165	-32.31	21	76.19	80.95		0.731126	0.025213
mmu-miR-346-3p		circ_1804	167	-31.18	18	77.78	83.33		FOXRED2	162	-30.28	20	70	80		0.757238	0.0181328
mmu-miR-346-3p		circ_1804	167	-31.18	18	77.78	83.33		IL12RB1	169	-31.58	19	78.95	84.21		0.835573	0.00503382
mmu-miR-346-3p		circ_1804	167	-31.18	18	77.78	83.33		SIPA1L2	164	-32.27	20	70	80		0.783349	0.0125168
mmu-miR-346-3p		circ_1804	167	-31.18	18	77.78	83.33		IDO2	168	-34.3	22	72.73	77.27		0.826869	0.00597575
mmu-miR-346-3p		circ_1804	167	-31.18	18	77.78	83.33		TIGD2	163	-30.06	21	71.43	76.19		0.713718	0.0308198
mmu-miR-346-3p		circ_1804	167	-31.18	18	77.78	83.33		MICALL2	172	-35.8	22	77.27	77.27		0.73983	0.0226809
mmu-miR-346-3p		circ_1804	167	-31.18	18	77.78	83.33		2019-09-09	167	-30.39	20	75	80		0.748534	0.0203226
mmu-miR-346-3p		circ_1804	167	-31.18	18	77.78	83.33		EPAS1	167	-35.65	21	76.19	76.19		0.861684	0.00282288
mmu-miR-346-3p		circ_1804	167	-31.18	18	77.78	83.33		ZFP608	166	-32.25	22	72.73	77.27		0.800757	0.00950848
mmu-miR-346-3p		circ_1804	167	-31.18	18	77.78	83.33		VASP	165	-33.6	20	80	80		0.748534	0.0203226
mmu-miR-346-3p		circ_1804	167	-31.18	18	77.78	83.33		AMOTL1	168	-32.15	20	75	80		0.818165	0.00703117
mmu-miR-346-3p		circ_1804	167	-31.18	18	77.78	83.33		RRP9	178	-34.66	20	85	85		0.800757	0.00950848
mmu-miR-346-3p		circ_1804	167	-31.18	18	77.78	83.33		DPP9	162	-30.13	20	75	75		0.783349	0.0125168
mmu-miR-346-3p		circ_1804	167	-31.18	18	77.78	83.33		SLC6A6	167	-32.47	21	76.19	76.19		0.783349	0.0125168
mmu-miR-346-3p		circ_1804	167	-31.18	18	77.78	83.33		WNK4	161	-30.19	21	76.19	76.19		0.826869	0.00597575
mmu-miR-346-3p		circ_1804	167	-31.18	18	77.78	83.33		SMAP2	167	-30.14	22	72.73	77.27		0.748534	0.0203226
mmu-miR-346-3p		circ_1804	167	-31.18	18	77.78	83.33		HHIP	160	-30.14	18	77.78	77.78		0.809461	0.0082066
mmu-miR-346-3p		circ_1804	167	-31.18	18	77.78	83.33		PHC2	167	-30.7	21	76.19	76.19		0.783349	0.0125168
mmu-miR-346-3p		circ_1804	167	-31.18	18	77.78	83.33		IFI204	167	-31.18	18	77.78	83.33		0.870388	0.0022686
mmu-miR-3470a		circ_946	195	-43.08	18	100	100		SLC22A15	187	-33.57	18	94.44	94.44		0.803326	0.00911066
mmu-miR-3470a		circ_946	195	-43.08	18	100	100		TMED5	195	-43.08	18	100	100		0.858099	0.00307611
mmu-miR-3470a		circ_946	195	-43.08	18	100	100		CHD9	195	-43.08	18	100	100		0.858099	0.00307611
mmu-miR-3470a		circ_946	195	-43.08	18	100	100		MMP19	187	-38.13	18	94.44	94.44		0.839841	0.00461137
mmu-miR-3470a		circ_946	195	-43.08	18	100	100		IFI204	195	-43.08	18	100	100		0.785069	0.0121946
mmu-miR-3470a		circ_946	195	-43.08	18	100	100		NEK7	195	-43.08	18	100	100		0.785069	0.0121946
mmu-miR-3470a		circ_946	195	-43.08	18	100	100		CENPA	195	-43.08	18	100	100		0.748554	0.0203173
mmu-miR-3470a		circ_946	195	-43.08	18	100	100		ITGA8	179	-30.02	18	88.89	88.89		0.858099	0.00307611
mmu-miR-3470a		circ_946	195	-43.08	18	100	100		IMP4	195	-43.08	18	100	100		0.730297	0.0254636
mmu-miR-3470a		circ_946	195	-43.08	18	100	100		ADAMTS9	187	-36.21	18	94.44	94.44		0.894614	0.00112701
mmu-miR-3470a		circ_946	195	-43.08	18	100	100		TBL3	195	-43.08	18	100	100		0.894614	0.00112701
mmu-miR-3470a		circ_1097	195	-43.08	18	100	100		SLC22A15	187	-33.57	18	94.44	94.44		0.796725	0.0101563
mmu-miR-3470a		circ_1097	195	-43.08	18	100	100		TMED5	195	-43.08	18	100	100		0.728918	0.0258836
mmu-miR-3470a		circ_1097	195	-43.08	18	100	100		CHD9	195	-43.08	18	100	100		0.728918	0.0258836
mmu-miR-3470a		circ_1097	195	-43.08	18	100	100		IFI204	195	-43.08	18	100	100		0.813676	0.00762197
mmu-miR-3470a		circ_1097	195	-43.08	18	100	100		NEK7	195	-43.08	18	100	100		0.796725	0.0101563
mmu-miR-3470a		circ_1097	195	-43.08	18	100	100		CENPA	195	-43.08	18	100	100		0.796725	0.0101563
mmu-miR-3470a		circ_1097	195	-43.08	18	100	100		IMP4	195	-43.08	18	100	100		0.728918	0.0258836
mmu-miR-3470a		circ_1097	195	-43.08	18	100	100		ADAMTS9	187	-36.21	18	94.44	94.44		0.728918	0.0258836
mmu-miR-3470a		circ_3118	195	-43.08	18	100	100		MMP19	187	-38.13	18	94.44	94.44		0.772315	0.0147213
mmu-miR-3470a		circ_1804	195	-43.08	18	100	100		SLC22A15	187	-33.57	18	94.44	94.44		0.861684	0.00282288
mmu-miR-3470a		circ_1804	195	-43.08	18	100	100		TMED5	195	-43.08	18	100	100		0.792053	0.0109431
mmu-miR-3470a		circ_1804	195	-43.08	18	100	100		MMP19	187	-38.13	18	94.44	94.44		0.73983	0.0226809
mmu-miR-3470a		circ_1804	195	-43.08	18	100	100		IFI204	195	-43.08	18	100	100		0.870388	0.0022686
mmu-miR-3470a		circ_1804	195	-43.08	18	100	100		NEK7	195	-43.08	18	100	100		0.8965	0.00105998
mmu-miR-3470a		circ_1804	195	-43.08	18	100	100		CENPA	195	-43.08	18	100	100		0.748534	0.0203226
mmu-miR-3470a		circ_1804	195	-43.08	18	100	100		ITGA8	179	-30.02	18	88.89	88.89		0.800757	0.00950848
mmu-miR-3470a		circ_1804	195	-43.08	18	100	100		IMP4	195	-43.08	18	100	100		0.940019	0.000164049
mmu-miR-3470a		circ_1804	195	-43.08	18	100	100		ADAMTS9	187	-36.21	18	94.44	94.44		0.731126	0.025213
mmu-miR-3470a		circ_1804	195	-43.08	18	100	100		TBL3	195	-43.08	18	100	100		0.748534	0.0203226
mmu-miR-3470a		circ_2567	182	-32.08	18	88.89	94.44		TMED5	195	-43.08	18	100	100		0.703005	0.0346443
mmu-miR-3470a		circ_2567	182	-32.08	18	88.89	94.44		TBL3	195	-43.08	18	100	100		0.752512	0.0193012
mmu-miR-3470b		circ_2313	195	-45.92	18	100	100		SSH2	195	-45.92	18	100	100		0.796725	0.0101563
mmu-miR-3470b		circ_2313	195	-45.92	18	100	100		AUTS2	179	-32.52	18	88.89	88.89		0.728918	0.0258836
mmu-miR-3470b		circ_2313	195	-45.92	18	100	100		ZCCHC4	195	-44.22	18	100	100		0.864531	0.00263237
mmu-miR-3470b		circ_2313	195	-45.92	18	100	100		RRP9	195	-45.92	18	100	100		0.949289	9.20002e-05
mmu-miR-3470b		circ_2313	195	-45.92	18	100	100		NAV1	187	-39.65	18	94.44	94.44		0.830628	0.00555542
mmu-miR-3470b		circ_2313	195	-45.92	18	100	100		XPR1	183	-36.85	18	88.89	94.44		0.830628	0.00555542
mmu-miR-3470b		circ_2313	195	-45.92	18	100	100		PFAS	195	-45.92	18	100	100		0.830628	0.00555542
mmu-miR-3470b		circ_2313	195	-45.92	18	100	100		CHKA	195	-45.92	18	100	100		0.762821	0.016814
mmu-miR-3470b		circ_2313	195	-45.92	18	100	100		NME1	191	-43.71	18	94.44	100		0.830628	0.00555542
mmu-miR-3470b		circ_2313	195	-45.92	18	100	100		POLR1B	195	-45.92	18	100	100		0.830628	0.00555542
mmu-miR-3470b		circ_2313	195	-45.92	18	100	100		S1PR2	195	-45.92	18	100	100		0.881483	0.00167742
mmu-miR-3470b		circ_2313	195	-45.92	18	100	100		DKC1	195	-45.92	18	100	100		0.74587	0.0210263
mmu-miR-3470b		circ_2313	195	-45.92	18	100	100		AHCYL1	187	-37.48	18	94.44	94.44		0.830628	0.00555542
mmu-miR-3470b		circ_2313	195	-45.92	18	100	100		CIAPIN1	187	-36.22	18	94.44	94.44		0.762821	0.016814
mmu-miR-3470b		circ_34	187	-40.51	18	94.44	94.44		SSH2	195	-45.92	18	100	100		0.8	0.0138283
mmu-miR-3470b		circ_34	187	-40.51	18	94.44	94.44		ZCCHC4	195	-44.22	18	100	100		0.933333	0.000749559
mmu-miR-3470b		circ_34	187	-40.51	18	94.44	94.44		RRP9	195	-45.92	18	100	100		0.85	0.00607363
mmu-miR-3470b		circ_34	187	-40.51	18	94.44	94.44		NAV1	187	-39.65	18	94.44	94.44		0.816667	0.0107694
mmu-miR-3470b		circ_34	187	-40.51	18	94.44	94.44		XPR1	183	-36.85	18	88.89	94.44		0.866667	0.00450838
mmu-miR-3470b		circ_34	187	-40.51	18	94.44	94.44		PFAS	195	-45.92	18	100	100		0.883333	0.0030754
mmu-miR-3470b		circ_34	187	-40.51	18	94.44	94.44		CHKA	195	-45.92	18	100	100		0.933333	0.000749559
mmu-miR-3470b		circ_34	187	-40.51	18	94.44	94.44		AOX3	195	-45.92	18	100	100		0.883333	0.0030754
mmu-miR-3470b		circ_34	187	-40.51	18	94.44	94.44		NME1	191	-43.71	18	94.44	100		0.866667	0.00450838
mmu-miR-3470b		circ_34	187	-40.51	18	94.44	94.44		POLR1B	195	-45.92	18	100	100		0.95	0.000352734
mmu-miR-3470b		circ_34	187	-40.51	18	94.44	94.44		S1PR2	195	-45.92	18	100	100		0.9	0.00202822
mmu-miR-3470b		circ_34	187	-40.51	18	94.44	94.44		DKC1	195	-45.92	18	100	100		0.883333	0.0030754
mmu-miR-3470b		circ_34	187	-40.51	18	94.44	94.44		AHCYL1	187	-37.48	18	94.44	94.44		0.866667	0.00450838
mmu-miR-3470b		circ_34	187	-40.51	18	94.44	94.44		CIAPIN1	187	-36.22	18	94.44	94.44		0.85	0.00607363
mmu-miR-3470b		circ_1983	195	-45.92	18	100	100		ZCCHC4	195	-44.22	18	100	100		0.833333	0.0082672
mmu-miR-3470b		circ_1983	195	-45.92	18	100	100		RRP9	195	-45.92	18	100	100		0.716667	0.0368662
mmu-miR-3470b		circ_1983	195	-45.92	18	100	100		NAV1	187	-39.65	18	94.44	94.44		0.75	0.0254905
mmu-miR-3470b		circ_1983	195	-45.92	18	100	100		XPR1	183	-36.85	18	88.89	94.44		0.766667	0.02139
mmu-miR-3470b		circ_1983	195	-45.92	18	100	100		CHKA	195	-45.92	18	100	100		0.816667	0.0107694
mmu-miR-3470b		circ_1983	195	-45.92	18	100	100		AOX3	195	-45.92	18	100	100		0.916667	0.00131173
mmu-miR-3470b		circ_1983	195	-45.92	18	100	100		POLR1B	195	-45.92	18	100	100		0.816667	0.0107694
mmu-miR-3470b		circ_1983	195	-45.92	18	100	100		S1PR2	195	-45.92	18	100	100		0.75	0.0254905
mmu-miR-3470b		circ_1983	195	-45.92	18	100	100		DKC1	195	-45.92	18	100	100		0.816667	0.0107694
mmu-miR-3470b		circ_1983	195	-45.92	18	100	100		AHCYL1	187	-37.48	18	94.44	94.44		0.766667	0.02139
mmu-miR-3470b		circ_1983	195	-45.92	18	100	100		CIAPIN1	187	-36.22	18	94.44	94.44		0.816667	0.0107694
mmu-miR-3473b		circ_2313	174	-40.28	20	80	85		TMEM167	169	-30.22	18	83.33	83.33		0.796725	0.0101563
mmu-miR-3473b		circ_2313	174	-40.28	20	80	85		NRP2	170	-31.49	21	76.19	80.95		0.762821	0.016814
mmu-miR-3473b		circ_2313	174	-40.28	20	80	85		DDX54	165	-32.86	18	77.78	83.33		0.813676	0.00762197
mmu-miR-3473b		circ_2313	174	-40.28	20	80	85		ZCCHC4	166	-30.52	20	75	80		0.864531	0.00263237
mmu-miR-3473b		circ_2313	174	-40.28	20	80	85		ACSL5	177	-31.48	18	88.89	88.89		0.864531	0.00263237
mmu-miR-3473b		circ_2313	174	-40.28	20	80	85		2019-09-09	169	-30.39	18	77.78	88.89		0.779773	0.0132052
mmu-miR-3473b		circ_2313	174	-40.28	20	80	85		AP1S1	166	-30.44	20	70	85		0.847579	0.00390855
mmu-miR-3473c		circ_93	184	-34.56	21	85.71	85.71		FGFR1	176	-35.52	20	80	85		0.803326	0.00911066
mmu-miR-3473c		circ_93	184	-34.56	21	85.71	85.71		APOBEC1	178	-34.18	18	88.89	88.89		0.894614	0.00112701
mmu-miR-3473c		circ_93	184	-34.56	21	85.71	85.71		WDR12	184	-36.21	21	85.71	85.71		0.894614	0.00112701
mmu-miR-3473c		circ_93	184	-34.56	21	85.71	85.71		CAMKK2	175	-35.37	21	80.95	80.95		0.839841	0.00461137
mmu-miR-3473d		circ_93	184	-32.93	22	81.82	86.36		IL6RA	198	-40.61	22	90.91	90.91		0.803326	0.00911066
mmu-miR-3473d		circ_93	184	-32.93	22	81.82	86.36		EXOSC2	194	-44.78	22	86.36	90.91		0.839841	0.00461137
mmu-miR-3473d		circ_93	184	-32.93	22	81.82	86.36		OASL1	162	-31.42	21	71.43	71.43		0.894614	0.00112701
mmu-miR-3473d		circ_93	184	-32.93	22	81.82	86.36		CHD9	182	-30.36	23	78.26	82.61		0.748554	0.0203173
mmu-miR-3473d		circ_93	184	-32.93	22	81.82	86.36		FRRS1	194	-43.18	22	86.36	90.91		0.803326	0.00911066
mmu-miR-3473d		circ_93	184	-32.93	22	81.82	86.36		CCNB1	194	-44.78	22	86.36	90.91		0.912871	0.000589839
mmu-miR-3473d		circ_93	184	-32.93	22	81.82	86.36		WDR12	194	-44.51	22	86.36	90.91		0.894614	0.00112701
mmu-miR-3473d		circ_93	184	-32.93	22	81.82	86.36		SLFN2	189	-40.89	23	82.61	86.96		0.894614	0.00112701
mmu-miR-3473d		circ_93	184	-32.93	22	81.82	86.36		NMD3	174	-31.24	22	77.27	77.27		0.839841	0.00461137
mmu-miR-3473d		circ_93	184	-32.93	22	81.82	86.36		WDR46	171	-31.76	21	76.19	80.95		0.785069	0.0121946
mmu-miR-3473d		circ_93	184	-32.93	22	81.82	86.36		TM4SF1	190	-36.54	23	82.61	86.96		0.894614	0.00112701
mmu-miR-3473d		circ_93	184	-32.93	22	81.82	86.36		KLHL2	170	-30.88	19	78.95	84.21		0.894614	0.00112701
mmu-miR-3473d		circ_93	184	-32.93	22	81.82	86.36		TNFRSF1B	183	-34.45	19	89.47	89.47		0.748554	0.0203173
mmu-miR-3473d		circ_93	184	-32.93	22	81.82	86.36		SLC22A15	198	-45.45	23	86.96	91.3		0.858099	0.00307611
mmu-miR-3473d		circ_3118	202	-46.76	22	90.91	95.45		NMD3	174	-31.24	22	77.27	77.27		0.772315	0.0147213
mmu-miR-3473d		circ_3118	202	-46.76	22	90.91	95.45		TM4SF1	190	-36.54	23	82.61	86.96		0.703005	0.0346443
mmu-miR-3473e		circ_2400	191	-43.31	18	94.44	100		DDX54	166	-30.33	19	73.68	84.21		0.703005	0.0346443
mmu-miR-3473e		circ_3118	179	-37.08	18	83.33	94.44		NRP2	170	-31.12	21	76.19	80.95		0.703005	0.0346443
mmu-miR-3473e		circ_3118	179	-37.08	18	83.33	94.44		CHKA	167	-30.47	19	73.68	84.21		0.703005	0.0346443
mmu-miR-3473e		circ_779	187	-42.38	18	88.89	100		EZR	163	-31.22	22	72.73	72.73		0.785069	0.0121946
mmu-miR-3473e		circ_779	187	-42.38	18	88.89	100		MTHFD2L	191	-43.31	18	94.44	100		0.785069	0.0121946
mmu-miR-3473e		circ_779	187	-42.38	18	88.89	100		TLR4	179	-36.83	18	88.89	88.89		0.912871	0.000589839
mmu-miR-3473e		circ_779	187	-42.38	18	88.89	100		B4GALT1	166	-30.6	19	73.68	84.21		0.803326	0.00911066
mmu-miR-3473e		circ_779	187	-42.38	18	88.89	100		FGFR1	183	-38.52	18	88.89	94.44		0.803326	0.00911066
mmu-miR-3473e		circ_779	187	-42.38	18	88.89	100		ZCCHC4	166	-30.15	20	75	80		0.839841	0.00461137
mmu-miR-3473e		circ_779	187	-42.38	18	88.89	100		PDSS1	183	-36.87	18	88.89	94.44		0.894614	0.00112701
mmu-miR-3473e		circ_779	187	-42.38	18	88.89	100		ABHD2	183	-37.09	18	88.89	94.44		0.803326	0.00911066
mmu-miR-3473e		circ_779	187	-42.38	18	88.89	100		TMED5	191	-43.31	18	94.44	100		0.912871	0.000589839
mmu-miR-3473e		circ_779	187	-42.38	18	88.89	100		AP1S1	166	-30.16	20	70	85		0.803326	0.00911066
mmu-miR-3473e		circ_779	187	-42.38	18	88.89	100		ACSL5	177	-31.11	18	88.89	88.89		0.839841	0.00461137
mmu-miR-3473e		circ_779	187	-42.38	18	88.89	100		CBX5	183	-38.7	18	88.89	94.44		0.839841	0.00461137
mmu-miR-3473e		circ_779	187	-42.38	18	88.89	100		NRP2	170	-31.12	21	76.19	80.95		0.785069	0.0121946
mmu-miR-3473e		circ_779	187	-42.38	18	88.89	100		NAV2	174	-33.09	19	84.21	84.21		0.803326	0.00911066
mmu-miR-3473e		circ_779	187	-42.38	18	88.89	100		HEG1	170	-32.6	18	77.78	88.89		0.858099	0.00307611
mmu-miR-3473e		circ_779	187	-42.38	18	88.89	100		TACC1	187	-41.02	18	88.89	100		0.785069	0.0121946
mmu-miR-3473e		circ_779	187	-42.38	18	88.89	100		RALB	175	-34.01	18	83.33	88.89		0.912871	0.000589839
mmu-miR-3473e		circ_779	187	-42.38	18	88.89	100		CHKA	167	-30.47	19	73.68	84.21		0.785069	0.0121946
mmu-miR-3473e		circ_779	187	-42.38	18	88.89	100		DDX54	166	-30.33	19	73.68	84.21		0.730297	0.0254636
mmu-miR-3473e		circ_779	187	-42.38	18	88.89	100		2019-09-09	169	-30.02	18	77.78	88.89		0.748554	0.0203173
mmu-miR-3473e		circ_2313	175	-37.75	21	76.19	85.71		EZR	163	-31.22	22	72.73	72.73		0.813676	0.00762197
mmu-miR-3473e		circ_2313	175	-37.75	21	76.19	85.71		MTHFD2L	191	-43.31	18	94.44	100		0.847579	0.00390855
mmu-miR-3473e		circ_2313	175	-37.75	21	76.19	85.71		TLR4	179	-36.83	18	88.89	88.89		0.813676	0.00762197
mmu-miR-3473e		circ_2313	175	-37.75	21	76.19	85.71		B4GALT1	166	-30.6	19	73.68	84.21		0.830628	0.00555542
mmu-miR-3473e		circ_2313	175	-37.75	21	76.19	85.71		FGFR1	183	-38.52	18	88.89	94.44		0.830628	0.00555542
mmu-miR-3473e		circ_2313	175	-37.75	21	76.19	85.71		ZCCHC4	166	-30.15	20	75	80		0.864531	0.00263237
mmu-miR-3473e		circ_2313	175	-37.75	21	76.19	85.71		PDSS1	183	-36.87	18	88.89	94.44		0.847579	0.00390855
mmu-miR-3473e		circ_2313	175	-37.75	21	76.19	85.71		ABHD2	183	-37.09	18	88.89	94.44		0.830628	0.00555542
mmu-miR-3473e		circ_2313	175	-37.75	21	76.19	85.71		TMED5	191	-43.31	18	94.44	100		0.881483	0.00167742
mmu-miR-3473e		circ_2313	175	-37.75	21	76.19	85.71		AP1S1	166	-30.16	20	70	85		0.847579	0.00390855
mmu-miR-3473e		circ_2313	175	-37.75	21	76.19	85.71		ACSL5	177	-31.11	18	88.89	88.89		0.864531	0.00263237
mmu-miR-3473e		circ_2313	175	-37.75	21	76.19	85.71		CBX5	183	-38.7	18	88.89	94.44		0.813676	0.00762197
mmu-miR-3473e		circ_2313	175	-37.75	21	76.19	85.71		NRP2	170	-31.12	21	76.19	80.95		0.762821	0.016814
mmu-miR-3473e		circ_2313	175	-37.75	21	76.19	85.71		NAV2	174	-33.09	19	84.21	84.21		0.830628	0.00555542
mmu-miR-3473e		circ_2313	175	-37.75	21	76.19	85.71		HEG1	170	-32.6	18	77.78	88.89		0.813676	0.00762197
mmu-miR-3473e		circ_2313	175	-37.75	21	76.19	85.71		TACC1	187	-41.02	18	88.89	100		0.864531	0.00263237
mmu-miR-3473e		circ_2313	175	-37.75	21	76.19	85.71		RALB	175	-34.01	18	83.33	88.89		0.813676	0.00762197
mmu-miR-3473e		circ_2313	175	-37.75	21	76.19	85.71		SSH2	170	-33.41	19	78.95	84.21		0.796725	0.0101563
mmu-miR-3473e		circ_2313	175	-37.75	21	76.19	85.71		CHKA	167	-30.47	19	73.68	84.21		0.762821	0.016814
mmu-miR-3473e		circ_2313	175	-37.75	21	76.19	85.71		DDX54	166	-30.33	19	73.68	84.21		0.813676	0.00762197
mmu-miR-3473e		circ_2313	175	-37.75	21	76.19	85.71		2019-09-09	169	-30.02	18	77.78	88.89		0.779773	0.0132052
mmu-miR-3473e		circ_1804	187	-40.61	18	88.89	100		EZR	163	-31.22	22	72.73	72.73		0.713718	0.0308198
mmu-miR-3473e		circ_1804	187	-40.61	18	88.89	100		MTHFD2L	191	-43.31	18	94.44	100		0.713718	0.0308198
mmu-miR-3473e		circ_1804	187	-40.61	18	88.89	100		TLR4	179	-36.83	18	88.89	88.89		0.835573	0.00503382
mmu-miR-3473e		circ_1804	187	-40.61	18	88.89	100		B4GALT1	166	-30.6	19	73.68	84.21		0.783349	0.0125168
mmu-miR-3473e		circ_1804	187	-40.61	18	88.89	100		FGFR1	183	-38.52	18	88.89	94.44		0.783349	0.0125168
mmu-miR-3473e		circ_1804	187	-40.61	18	88.89	100		ZCCHC4	166	-30.15	20	75	80		0.748534	0.0203226
mmu-miR-3473e		circ_1804	187	-40.61	18	88.89	100		PDSS1	183	-36.87	18	88.89	94.44		0.826869	0.00597575
mmu-miR-3473e		circ_1804	187	-40.61	18	88.89	100		ABHD2	183	-37.09	18	88.89	94.44		0.783349	0.0125168
mmu-miR-3473e		circ_1804	187	-40.61	18	88.89	100		TMED5	191	-43.31	18	94.44	100		0.792053	0.0109431
mmu-miR-3473e		circ_1804	187	-40.61	18	88.89	100		ACSL5	177	-31.11	18	88.89	88.89		0.748534	0.0203226
mmu-miR-3473e		circ_1804	187	-40.61	18	88.89	100		CBX5	183	-38.7	18	88.89	94.44		0.731126	0.025213
mmu-miR-3473e		circ_1804	187	-40.61	18	88.89	100		NAV2	174	-33.09	19	84.21	84.21		0.783349	0.0125168
mmu-miR-3473e		circ_1804	187	-40.61	18	88.89	100		HEG1	170	-32.6	18	77.78	88.89		0.861684	0.00282288
mmu-miR-3473e		circ_1804	187	-40.61	18	88.89	100		TACC1	187	-41.02	18	88.89	100		0.774646	0.0142357
mmu-miR-3473e		circ_1804	187	-40.61	18	88.89	100		RALB	175	-34.01	18	83.33	88.89		0.835573	0.00503382
mmu-miR-3473e		circ_1804	187	-40.61	18	88.89	100		DDX54	166	-30.33	19	73.68	84.21		0.783349	0.0125168
mmu-miR-3473e		circ_1804	187	-40.61	18	88.89	100		2019-09-09	169	-30.02	18	77.78	88.89		0.748534	0.0203226
mmu-miR-3473e		circ_1983	187	-41.02	18	88.89	100		EZR	163	-31.22	22	72.73	72.73		0.8	0.0138283
mmu-miR-3473e		circ_1983	187	-41.02	18	88.89	100		MTHFD2L	191	-43.31	18	94.44	100		0.883333	0.0030754
mmu-miR-3473e		circ_1983	187	-41.02	18	88.89	100		TLR4	179	-36.83	18	88.89	88.89		0.85	0.00607363
mmu-miR-3473e		circ_1983	187	-41.02	18	88.89	100		B4GALT1	166	-30.6	19	73.68	84.21		0.766667	0.02139
mmu-miR-3473e		circ_1983	187	-41.02	18	88.89	100		FGFR1	183	-38.52	18	88.89	94.44		0.766667	0.02139
mmu-miR-3473e		circ_1983	187	-41.02	18	88.89	100		ZCCHC4	166	-30.15	20	75	80		0.833333	0.0082672
mmu-miR-3473e		circ_1983	187	-41.02	18	88.89	100		PDSS1	183	-36.87	18	88.89	94.44		0.783333	0.0172233
mmu-miR-3473e		circ_1983	187	-41.02	18	88.89	100		ABHD2	183	-37.09	18	88.89	94.44		0.766667	0.02139
mmu-miR-3473e		circ_1983	187	-41.02	18	88.89	100		TMED5	191	-43.31	18	94.44	100		0.733333	0.0311232
mmu-miR-3473e		circ_1983	187	-41.02	18	88.89	100		AP1S1	166	-30.16	20	70	85		0.75	0.0254905
mmu-miR-3473e		circ_1983	187	-41.02	18	88.89	100		ACSL5	177	-31.11	18	88.89	88.89		0.766667	0.02139
mmu-miR-3473e		circ_1983	187	-41.02	18	88.89	100		CBX5	183	-38.7	18	88.89	94.44		0.716667	0.0368662
mmu-miR-3473e		circ_1983	187	-41.02	18	88.89	100		NRP2	170	-31.12	21	76.19	80.95		0.75	0.0254905
mmu-miR-3473e		circ_1983	187	-41.02	18	88.89	100		NAV2	174	-33.09	19	84.21	84.21		0.766667	0.02139
mmu-miR-3473e		circ_1983	187	-41.02	18	88.89	100		HEG1	170	-32.6	18	77.78	88.89		0.783333	0.0172233
mmu-miR-3473e		circ_1983	187	-41.02	18	88.89	100		RALB	175	-34.01	18	83.33	88.89		0.783333	0.0172233
mmu-miR-3473e		circ_1983	187	-41.02	18	88.89	100		CHKA	167	-30.47	19	73.68	84.21		0.816667	0.0107694
mmu-miR-3473e		circ_1983	187	-41.02	18	88.89	100		DDX54	166	-30.33	19	73.68	84.21		0.75	0.0254905
mmu-miR-3473e		circ_1983	187	-41.02	18	88.89	100		2019-09-09	169	-30.02	18	77.78	88.89		0.8	0.0138283
mmu-miR-3473e		circ_2201	187	-40.61	18	88.89	100		EZR	163	-31.22	22	72.73	72.73		0.779773	0.0132052
mmu-miR-3473e		circ_2201	187	-40.61	18	88.89	100		MTHFD2L	191	-43.31	18	94.44	100		0.847579	0.00390855
mmu-miR-3473e		circ_2201	187	-40.61	18	88.89	100		B4GALT1	166	-30.6	19	73.68	84.21		0.779773	0.0132052
mmu-miR-3473e		circ_2201	187	-40.61	18	88.89	100		FGFR1	183	-38.52	18	88.89	94.44		0.779773	0.0132052
mmu-miR-3473e		circ_2201	187	-40.61	18	88.89	100		ZCCHC4	166	-30.15	20	75	80		0.813676	0.00762197
mmu-miR-3473e		circ_2201	187	-40.61	18	88.89	100		ABHD2	183	-37.09	18	88.89	94.44		0.779773	0.0132052
mmu-miR-3473e		circ_2201	187	-40.61	18	88.89	100		ACSL5	177	-31.11	18	88.89	88.89		0.74587	0.0210263
mmu-miR-3473e		circ_2201	187	-40.61	18	88.89	100		NRP2	170	-31.12	21	76.19	80.95		0.728918	0.0258836
mmu-miR-3473e		circ_2201	187	-40.61	18	88.89	100		NAV2	174	-33.09	19	84.21	84.21		0.779773	0.0132052
mmu-miR-3473e		circ_2201	187	-40.61	18	88.89	100		HEG1	170	-32.6	18	77.78	88.89		0.728918	0.0258836
mmu-miR-3473e		circ_2201	187	-40.61	18	88.89	100		TACC1	187	-41.02	18	88.89	100		0.711967	0.0314253
mmu-miR-3473e		circ_2201	187	-40.61	18	88.89	100		SSH2	170	-33.41	19	78.95	84.21		0.711967	0.0314253
mmu-miR-3473e		circ_2201	187	-40.61	18	88.89	100		CHKA	167	-30.47	19	73.68	84.21		0.796725	0.0101563
mmu-miR-3473e		circ_2201	187	-40.61	18	88.89	100		DDX54	166	-30.33	19	73.68	84.21		0.779773	0.0132052
mmu-miR-3473e		circ_2201	187	-40.61	18	88.89	100		2019-09-09	169	-30.02	18	77.78	88.89		0.813676	0.00762197
mmu-miR-3572-3p		circ_946	179	-30.22	18	83.33	94.44		APOL9B	177	-35.44	21	76.19	85.71		0.785069	0.0121946
mmu-miR-361-3p		circ_2201	179	-31.18	25	72	80		TRIO	190	-41.88	22	77.27	95.45		0.847579	0.00390855
mmu-miR-361-3p		circ_2201	179	-31.18	25	72	80		GNPDA1	171	-31.43	20	80	80		0.728918	0.0258836
mmu-miR-361-3p		circ_2201	179	-31.18	25	72	80		MAP3K5	174	-31.34	23	73.91	78.26		0.728918	0.0258836
mmu-miR-361-3p		circ_1804	179	-31.18	25	72	80		TRIO	190	-41.88	22	77.27	95.45		0.774646	0.0142357
mmu-miR-361-3p		circ_1804	179	-31.18	25	72	80		MAP3K5	174	-31.34	23	73.91	78.26		0.861684	0.00282288
mmu-miR-3620-3p		circ_780	168	-35.87	21	76.19	76.19		PIK3R5	175	-34.71	20	80	85		0.858099	0.00307611
mmu-miR-3620-3p		circ_780	168	-35.87	21	76.19	76.19		CARD6	172	-35.85	21	76.19	80.95		0.785069	0.0121946
mmu-miR-3620-3p		circ_780	168	-35.87	21	76.19	76.19		HLF	171	-33.4	20	80	80		0.785069	0.0121946
mmu-miR-370-3p		circ_2567	164	-30.1	21	71.43	76.19		DENND4C	170	-31.76	22	77.27	77.27		0.752512	0.0193012
mmu-miR-370-3p		circ_2567	164	-30.1	21	71.43	76.19		DDX39	168	-31.61	19	78.95	78.95		0.703005	0.0346443
mmu-miR-370-3p		circ_2567	164	-30.1	21	71.43	76.19		ABCC5	168	-33.94	20	75	80		0.821822	0.00657343
mmu-miR-370-3p		circ_1426	160	-30.11	18	77.78	77.78		MICALL2	164	-31.69	21	71.43	76.19		0.730297	0.0254636
mmu-miR-370-3p		circ_1426	160	-30.11	18	77.78	77.78		TRIOBP	163	-34.35	20	70	80		0.894614	0.00112701
mmu-miR-370-3p		circ_1426	160	-30.11	18	77.78	77.78		SPON1	163	-31.26	20	70	80		0.803326	0.00911066
mmu-miR-370-3p		circ_1426	160	-30.11	18	77.78	77.78		DENND4C	170	-31.76	22	77.27	77.27		0.803326	0.00911066
mmu-miR-370-3p		circ_1426	160	-30.11	18	77.78	77.78		PML	172	-32.43	21	76.19	80.95		0.785069	0.0121946
mmu-miR-370-3p		circ_1426	160	-30.11	18	77.78	77.78		FBXL7	176	-36.74	20	80	85		0.803326	0.00911066
mmu-miR-370-3p		circ_1426	160	-30.11	18	77.78	77.78		PHC2	161	-30.6	19	73.68	78.95		0.785069	0.0121946
mmu-miR-370-3p		circ_1426	160	-30.11	18	77.78	77.78		NKRF	164	-32.81	21	71.43	76.19		0.858099	0.00307611
mmu-miR-370-3p		circ_1426	160	-30.11	18	77.78	77.78		LDLRAP1	172	-40.37	23	73.91	78.26		0.785069	0.0121946
mmu-miR-370-3p		circ_1426	160	-30.11	18	77.78	77.78		TRIO	167	-36.38	22	77.27	77.27		0.748554	0.0203173
mmu-miR-370-3p		circ_1426	160	-30.11	18	77.78	77.78		PLCE1	167	-33.71	19	78.95	78.95		0.803326	0.00911066
mmu-miR-370-3p		circ_1492	167	-34.42	20	75	80		MICALL2	164	-31.69	21	71.43	76.19		0.803326	0.00911066
mmu-miR-370-3p		circ_1492	167	-34.42	20	75	80		TRIOBP	163	-34.35	20	70	80		0.803326	0.00911066
mmu-miR-370-3p		circ_1492	167	-34.42	20	75	80		SPON1	163	-31.26	20	70	80		0.785069	0.0121946
mmu-miR-370-3p		circ_1492	167	-34.42	20	75	80		DENND4C	170	-31.76	22	77.27	77.27		0.785069	0.0121946
mmu-miR-370-3p		circ_1492	167	-34.42	20	75	80		DDX39	168	-31.61	19	78.95	78.95		0.912871	0.000589839
mmu-miR-370-3p		circ_1492	167	-34.42	20	75	80		PML	172	-32.43	21	76.19	80.95		0.803326	0.00911066
mmu-miR-370-3p		circ_1492	167	-34.42	20	75	80		FBXL7	176	-36.74	20	80	85		0.785069	0.0121946
mmu-miR-370-3p		circ_1492	167	-34.42	20	75	80		NUP160	168	-33.06	21	71.43	80.95		0.712039	0.0314
mmu-miR-370-3p		circ_1492	167	-34.42	20	75	80		PHC2	161	-30.6	19	73.68	78.95		0.803326	0.00911066
mmu-miR-370-3p		circ_1492	167	-34.42	20	75	80		NKRF	164	-32.81	21	71.43	76.19		0.839841	0.00461137
mmu-miR-370-3p		circ_1492	167	-34.42	20	75	80		LDLRAP1	172	-40.37	23	73.91	78.26		0.803326	0.00911066
mmu-miR-370-3p		circ_1492	167	-34.42	20	75	80		TRIO	167	-36.38	22	77.27	77.27		0.785069	0.0121946
mmu-miR-370-3p		circ_1492	167	-34.42	20	75	80		PLCE1	167	-33.71	19	78.95	78.95		0.785069	0.0121946
mmu-miR-376b-5p		circ_2318	188	-30.38	20	85	95		VCAN	188	-30.38	20	85	95		0.761513	0.0171171
mmu-miR-3971		circ_1804	170	-31.42	18	83.33	83.33		TRIO	168	-30.68	20	75	80		0.774646	0.0142357
mmu-miR-3971		circ_1804	170	-31.42	18	83.33	83.33		SESTD1	172	-35.42	20	70	90		0.731126	0.025213
mmu-miR-3971		circ_1804	170	-31.42	18	83.33	83.33		ZCCHC4	179	-37.16	18	88.89	88.89		0.748534	0.0203226
mmu-miR-3971		circ_1804	170	-31.42	18	83.33	83.33		MYO18A	166	-32.72	19	73.68	84.21		0.748534	0.0203226
mmu-miR-3971		circ_2201	170	-31.42	18	83.33	83.33		TRIO	168	-30.68	20	75	80		0.847579	0.00390855
mmu-miR-3971		circ_2201	170	-31.42	18	83.33	83.33		SESTD1	172	-35.42	20	70	90		0.813676	0.00762197
mmu-miR-3971		circ_2201	170	-31.42	18	83.33	83.33		ZCCHC4	179	-37.16	18	88.89	88.89		0.813676	0.00762197
mmu-miR-3971		circ_2201	170	-31.42	18	83.33	83.33		ARHGAP26	164	-30.71	20	70	80		0.796725	0.0101563
mmu-miR-3971		circ_2201	170	-31.42	18	83.33	83.33		MYO18A	166	-32.72	19	73.68	84.21		0.74587	0.0210263
mmu-miR-466f-3p		circ_1804	178	-33.35	20	85	90		HIPK1	191	-38.86	18	94.44	100		0.783349	0.0125168
mmu-miR-466f-3p		circ_1804	178	-33.35	20	85	90		ADAMTS9	183	-32.52	18	88.89	94.44		0.731126	0.025213
mmu-miR-466f-3p		circ_1804	178	-33.35	20	85	90		SHQ1	183	-34.57	18	88.89	94.44		0.835573	0.00503382
mmu-miR-466f-3p		circ_1804	178	-33.35	20	85	90		SYT12	183	-30.12	18	88.89	94.44		0.922612	0.000393338
mmu-miR-466f-3p		circ_1804	178	-33.35	20	85	90		NAV2	191	-38.86	18	94.44	100		0.783349	0.0125168
mmu-miR-466f-3p		circ_1804	178	-33.35	20	85	90		EPS8	191	-38.86	18	94.44	100		0.8965	0.00105998
mmu-miR-466f-3p		circ_1804	178	-33.35	20	85	90		LOXL3	175	-30.45	20	80	85		0.713718	0.0308198
mmu-miR-466f-3p		circ_1804	178	-33.35	20	85	90		TLR4	187	-35.15	19	89.47	94.74		0.835573	0.00503382
mmu-miR-466f-3p		circ_1804	178	-33.35	20	85	90		ITPRIPL2	178	-33.35	20	85	90		0.783349	0.0125168
mmu-miR-466f-3p		circ_1804	178	-33.35	20	85	90		PYDC3	191	-38.86	18	94.44	100		0.826869	0.00597575
mmu-miR-466f-3p		circ_780	183	-32.52	18	88.89	94.44		HIPK1	191	-38.86	18	94.44	100		0.785069	0.0121946
mmu-miR-466f-3p		circ_780	183	-32.52	18	88.89	94.44		ADAMTS9	183	-32.52	18	88.89	94.44		0.803326	0.00911066
mmu-miR-466f-3p		circ_780	183	-32.52	18	88.89	94.44		SHQ1	183	-34.57	18	88.89	94.44		0.858099	0.00307611
mmu-miR-466f-3p		circ_780	183	-32.52	18	88.89	94.44		KLRA2	191	-38.86	18	94.44	100		0.839841	0.00461137
mmu-miR-466f-3p		circ_780	183	-32.52	18	88.89	94.44		NUP160	191	-38.86	18	94.44	100		0.712039	0.0314
mmu-miR-466f-3p		circ_780	183	-32.52	18	88.89	94.44		SYT12	183	-30.12	18	88.89	94.44		0.785069	0.0121946
mmu-miR-466f-3p		circ_780	183	-32.52	18	88.89	94.44		NAV2	191	-38.86	18	94.44	100		0.785069	0.0121946
mmu-miR-466f-3p		circ_780	183	-32.52	18	88.89	94.44		EPS8	191	-38.86	18	94.44	100		0.748554	0.0203173
mmu-miR-466f-3p		circ_780	183	-32.52	18	88.89	94.44		LOXL3	175	-30.45	20	80	85		0.803326	0.00911066
mmu-miR-466f-3p		circ_780	183	-32.52	18	88.89	94.44		TLR4	187	-35.15	19	89.47	94.74		0.839841	0.00461137
mmu-miR-466f-3p		circ_780	183	-32.52	18	88.89	94.44		ITPRIPL2	178	-33.35	20	85	90		0.803326	0.00911066
mmu-miR-466f-3p		circ_780	183	-32.52	18	88.89	94.44		PYDC3	191	-38.86	18	94.44	100		0.748554	0.0203173
mmu-miR-466f-3p		circ_265	183	-31.05	18	88.89	94.44		ADAMTS9	183	-32.52	18	88.89	94.44		0.783333	0.0172233
mmu-miR-466f-3p		circ_265	183	-31.05	18	88.89	94.44		SHQ1	183	-34.57	18	88.89	94.44		0.933333	0.000749559
mmu-miR-466f-3p		circ_265	183	-31.05	18	88.89	94.44		KLRA2	191	-38.86	18	94.44	100		0.816667	0.0107694
mmu-miR-466f-3p		circ_265	183	-31.05	18	88.89	94.44		SYT12	183	-30.12	18	88.89	94.44		0.85	0.00607363
mmu-miR-466f-3p		circ_265	183	-31.05	18	88.89	94.44		EPS8	191	-38.86	18	94.44	100		0.733333	0.0311232
mmu-miR-466f-3p		circ_265	183	-31.05	18	88.89	94.44		LOXL3	175	-30.45	20	80	85		0.866667	0.00450838
mmu-miR-466f-3p		circ_265	183	-31.05	18	88.89	94.44		TLR4	187	-35.15	19	89.47	94.74		0.783333	0.0172233
mmu-miR-466f-3p		circ_265	183	-31.05	18	88.89	94.44		ITPRIPL2	178	-33.35	20	85	90		0.816667	0.0107694
mmu-miR-466f-3p		circ_265	183	-31.05	18	88.89	94.44		PYDC3	191	-38.86	18	94.44	100		0.783333	0.0172233
mmu-miR-466f-3p		circ_167	191	-38.86	18	94.44	100		HIPK1	191	-38.86	18	94.44	100		0.803326	0.00911066
mmu-miR-466f-3p		circ_167	191	-38.86	18	94.44	100		ADAMTS9	183	-32.52	18	88.89	94.44		0.839841	0.00461137
mmu-miR-466f-3p		circ_167	191	-38.86	18	94.44	100		SHQ1	183	-34.57	18	88.89	94.44		0.839841	0.00461137
mmu-miR-466f-3p		circ_167	191	-38.86	18	94.44	100		KLRA2	191	-38.86	18	94.44	100		0.803326	0.00911066
mmu-miR-466f-3p		circ_167	191	-38.86	18	94.44	100		NUP160	191	-38.86	18	94.44	100		0.712039	0.0314
mmu-miR-466f-3p		circ_167	191	-38.86	18	94.44	100		SYT12	183	-30.12	18	88.89	94.44		0.858099	0.00307611
mmu-miR-466f-3p		circ_167	191	-38.86	18	94.44	100		NAV2	191	-38.86	18	94.44	100		0.803326	0.00911066
mmu-miR-466f-3p		circ_167	191	-38.86	18	94.44	100		EPS8	191	-38.86	18	94.44	100		0.839841	0.00461137
mmu-miR-466f-3p		circ_167	191	-38.86	18	94.44	100		LOXL3	175	-30.45	20	80	85		0.785069	0.0121946
mmu-miR-466f-3p		circ_167	191	-38.86	18	94.44	100		TLR4	187	-35.15	19	89.47	94.74		0.912871	0.000589839
mmu-miR-466f-3p		circ_167	191	-38.86	18	94.44	100		ITPRIPL2	178	-33.35	20	85	90		0.730297	0.0254636
mmu-miR-466f-3p		circ_167	191	-38.86	18	94.44	100		PYDC3	191	-38.86	18	94.44	100		0.894614	0.00112701
mmu-miR-466i-3p		circ_265	196	-35.82	19	94.74	100		IMP4	192	-31.9	20	90	95		0.816667	0.0107694
mmu-miR-466i-3p		circ_265	196	-35.82	19	94.74	100		ITPRIPL2	187	-30.34	21	90.48	90.48		0.816667	0.0107694
mmu-miR-466i-3p		circ_265	196	-35.82	19	94.74	100		KLRA2	196	-35.82	19	94.74	100		0.816667	0.0107694
mmu-miR-466i-3p		circ_265	196	-35.82	19	94.74	100		ADAMTS9	183	-30.31	21	85.71	90.48		0.783333	0.0172233
mmu-miR-466i-3p		circ_265	196	-35.82	19	94.74	100		SHQ1	188	-31.53	19	89.47	94.74		0.933333	0.000749559
mmu-miR-466i-3p		circ_265	196	-35.82	19	94.74	100		EPS8	196	-35.82	19	94.74	100		0.733333	0.0311232
mmu-miR-466i-3p		circ_265	196	-35.82	19	94.74	100		LOXL3	180	-30.83	21	80.95	85.71		0.866667	0.00450838
mmu-miR-466i-3p		circ_265	196	-35.82	19	94.74	100		NRP2	196	-35.82	19	94.74	100		0.816667	0.0107694
mmu-miR-466i-3p		circ_265	196	-35.82	19	94.74	100		HEG1	188	-32.02	19	89.47	94.74		0.716667	0.0368662
mmu-miR-466i-3p		circ_265	196	-35.82	19	94.74	100		PYDC3	196	-35.82	19	94.74	100		0.783333	0.0172233
mmu-miR-466i-3p		circ_779	196	-35.82	19	94.74	100		IMP4	192	-31.9	20	90	95		0.839841	0.00461137
mmu-miR-466i-3p		circ_779	196	-35.82	19	94.74	100		HIPK1	196	-35.82	19	94.74	100		0.803326	0.00911066
mmu-miR-466i-3p		circ_779	196	-35.82	19	94.74	100		ITPRIPL2	187	-30.34	21	90.48	90.48		0.730297	0.0254636
mmu-miR-466i-3p		circ_779	196	-35.82	19	94.74	100		MTMR10	191	-33.31	18	94.44	100		0.803326	0.00911066
mmu-miR-466i-3p		circ_779	196	-35.82	19	94.74	100		KLRA2	196	-35.82	19	94.74	100		0.803326	0.00911066
mmu-miR-466i-3p		circ_779	196	-35.82	19	94.74	100		ADAMTS9	183	-30.31	21	85.71	90.48		0.839841	0.00461137
mmu-miR-466i-3p		circ_779	196	-35.82	19	94.74	100		BCL2	196	-35.82	19	94.74	100		0.803326	0.00911066
mmu-miR-466i-3p		circ_779	196	-35.82	19	94.74	100		SHQ1	188	-31.53	19	89.47	94.74		0.839841	0.00461137
mmu-miR-466i-3p		circ_779	196	-35.82	19	94.74	100		EPS8	196	-35.82	19	94.74	100		0.839841	0.00461137
mmu-miR-466i-3p		circ_779	196	-35.82	19	94.74	100		LOXL3	180	-30.83	21	80.95	85.71		0.785069	0.0121946
mmu-miR-466i-3p		circ_779	196	-35.82	19	94.74	100		NRP2	196	-35.82	19	94.74	100		0.785069	0.0121946
mmu-miR-466i-3p		circ_779	196	-35.82	19	94.74	100		HEG1	188	-32.02	19	89.47	94.74		0.858099	0.00307611
mmu-miR-466i-3p		circ_779	196	-35.82	19	94.74	100		NUP160	196	-35.82	19	94.74	100		0.712039	0.0314
mmu-miR-466i-3p		circ_779	196	-35.82	19	94.74	100		PYDC3	196	-35.82	19	94.74	100		0.894614	0.00112701
mmu-miR-466i-3p		circ_779	196	-35.82	19	94.74	100		NAV2	196	-35.82	19	94.74	100		0.803326	0.00911066
mmu-miR-466i-3p		circ_1097	200	-37.44	19	100	100		IMP4	192	-31.9	20	90	95		0.728918	0.0258836
mmu-miR-466i-3p		circ_1097	200	-37.44	19	100	100		HIPK1	196	-35.82	19	94.74	100		0.762821	0.016814
mmu-miR-466i-3p		circ_1097	200	-37.44	19	100	100		MTMR10	191	-33.31	18	94.44	100		0.762821	0.016814
mmu-miR-466i-3p		circ_1097	200	-37.44	19	100	100		ADAMTS9	183	-30.31	21	85.71	90.48		0.728918	0.0258836
mmu-miR-466i-3p		circ_1097	200	-37.44	19	100	100		BCL2	196	-35.82	19	94.74	100		0.762821	0.016814
mmu-miR-466i-3p		circ_1097	200	-37.44	19	100	100		SHQ1	188	-31.53	19	89.47	94.74		0.711967	0.0314253
mmu-miR-466i-3p		circ_1097	200	-37.44	19	100	100		EPS8	196	-35.82	19	94.74	100		0.796725	0.0101563
mmu-miR-466i-3p		circ_1097	200	-37.44	19	100	100		HEG1	188	-32.02	19	89.47	94.74		0.847579	0.00390855
mmu-miR-466i-3p		circ_1097	200	-37.44	19	100	100		PYDC3	196	-35.82	19	94.74	100		0.779773	0.0132052
mmu-miR-466i-3p		circ_1097	200	-37.44	19	100	100		NAV2	196	-35.82	19	94.74	100		0.762821	0.016814
mmu-miR-466i-3p		circ_2400	196	-35.82	19	94.74	100		IMP4	192	-31.9	20	90	95		0.703005	0.0346443
mmu-miR-466i-3p		circ_2400	196	-35.82	19	94.74	100		ITPRIPL2	187	-30.34	21	90.48	90.48		0.703005	0.0346443
mmu-miR-466i-3p		circ_167	196	-35.82	19	94.74	100		IMP4	192	-31.9	20	90	95		0.839841	0.00461137
mmu-miR-466i-3p		circ_167	196	-35.82	19	94.74	100		HIPK1	196	-35.82	19	94.74	100		0.803326	0.00911066
mmu-miR-466i-3p		circ_167	196	-35.82	19	94.74	100		ITPRIPL2	187	-30.34	21	90.48	90.48		0.730297	0.0254636
mmu-miR-466i-3p		circ_167	196	-35.82	19	94.74	100		MTMR10	191	-33.31	18	94.44	100		0.803326	0.00911066
mmu-miR-466i-3p		circ_167	196	-35.82	19	94.74	100		KLRA2	196	-35.82	19	94.74	100		0.803326	0.00911066
mmu-miR-466i-3p		circ_167	196	-35.82	19	94.74	100		ADAMTS9	183	-30.31	21	85.71	90.48		0.839841	0.00461137
mmu-miR-466i-3p		circ_167	196	-35.82	19	94.74	100		BCL2	196	-35.82	19	94.74	100		0.803326	0.00911066
mmu-miR-466i-3p		circ_167	196	-35.82	19	94.74	100		SHQ1	188	-31.53	19	89.47	94.74		0.839841	0.00461137
mmu-miR-466i-3p		circ_167	196	-35.82	19	94.74	100		EPS8	196	-35.82	19	94.74	100		0.839841	0.00461137
mmu-miR-466i-3p		circ_167	196	-35.82	19	94.74	100		LOXL3	180	-30.83	21	80.95	85.71		0.785069	0.0121946
mmu-miR-466i-3p		circ_167	196	-35.82	19	94.74	100		NRP2	196	-35.82	19	94.74	100		0.785069	0.0121946
mmu-miR-466i-3p		circ_167	196	-35.82	19	94.74	100		HEG1	188	-32.02	19	89.47	94.74		0.858099	0.00307611
mmu-miR-466i-3p		circ_167	196	-35.82	19	94.74	100		NUP160	196	-35.82	19	94.74	100		0.712039	0.0314
mmu-miR-466i-3p		circ_167	196	-35.82	19	94.74	100		PYDC3	196	-35.82	19	94.74	100		0.894614	0.00112701
mmu-miR-466i-3p		circ_167	196	-35.82	19	94.74	100		NAV2	196	-35.82	19	94.74	100		0.803326	0.00911066
mmu-miR-466k		circ_779	185	-31.24	20	80	95		GDA	185	-30.72	22	77.27	90.91		0.858099	0.00307611
mmu-miR-466k		circ_779	185	-31.24	20	80	95		BRCC3	189	-30.35	22	86.36	86.36		0.803326	0.00911066
mmu-miR-466k		circ_779	185	-31.24	20	80	95		EPAS1	177	-31.02	20	75	90		0.858099	0.00307611
mmu-miR-466k		circ_779	185	-31.24	20	80	95		CHKA	178	-30.38	20	85	90		0.785069	0.0121946
mmu-miR-466k		circ_779	185	-31.24	20	80	95		FRMD4A	181	-31.74	20	70	100		0.803326	0.00911066
mmu-miR-466k		circ_779	185	-31.24	20	80	95		FAM169B	185	-32.89	20	75	100		0.803326	0.00911066
mmu-miR-466m-3p		circ_265	184	-33.09	19	84.21	94.74		TLR4	188	-34.57	20	85	95		0.783333	0.0172233
mmu-miR-466m-3p		circ_265	184	-33.09	19	84.21	94.74		LOXL3	184	-31.99	19	84.21	94.74		0.866667	0.00450838
mmu-miR-466m-3p		circ_265	184	-33.09	19	84.21	94.74		ADAMTS9	188	-33.93	19	89.47	94.74		0.783333	0.0172233
mmu-miR-497b		circ_915	175	-31.48	18	77.78	94.44		HHIPL1	178	-33.31	19	84.21	89.47		0.835573	0.00503382
mmu-miR-497b		circ_915	175	-31.48	18	77.78	94.44		DOCK10	182	-31.44	26	73.08	80.77		0.835573	0.00503382
mmu-miR-497b		circ_915	175	-31.48	18	77.78	94.44		DDX54	174	-32.97	18	83.33	88.89		0.765942	0.0161057
mmu-miR-504-3p		circ_2313	183	-37.64	18	83.33	100		ITGA5	175	-32.88	20	80	85		0.830628	0.00555542
mmu-miR-504-3p		circ_2313	183	-37.64	18	83.33	100		POR	171	-30.98	19	78.95	84.21		0.813676	0.00762197
mmu-miR-504-3p		circ_2313	183	-37.64	18	83.33	100		SLC22A15	172	-30.48	21	76.19	80.95		0.813676	0.00762197
mmu-miR-504-3p		circ_2313	183	-37.64	18	83.33	100		FAM63A	168	-30.9	21	76.19	76.19		0.864531	0.00263237
mmu-miR-504-3p		circ_2313	183	-37.64	18	83.33	100		TRMT61A	188	-40.52	19	89.47	94.74		0.728918	0.0258836
mmu-miR-504-3p		circ_2313	183	-37.64	18	83.33	100		AUTS2	169	-30.39	19	78.95	84.21		0.728918	0.0258836
mmu-miR-504-3p		circ_2313	183	-37.64	18	83.33	100		TAF5L	167	-30.71	21	76.19	76.19		0.864531	0.00263237
mmu-miR-504-3p		circ_2313	183	-37.64	18	83.33	100		SSH2	170	-31.41	19	78.95	84.21		0.796725	0.0101563
mmu-miR-504-3p		circ_2313	183	-37.64	18	83.33	100		LPIN3	175	-31.41	19	78.95	89.47		0.847579	0.00390855
mmu-miR-504-3p		circ_2313	183	-37.64	18	83.33	100		FRRS1	169	-30.21	18	83.33	83.33		0.881483	0.00167742
mmu-miR-504-3p		circ_946	166	-30.11	20	75	80		ITGA5	175	-32.88	20	80	85		0.858099	0.00307611
mmu-miR-504-3p		circ_946	166	-30.11	20	75	80		POR	171	-30.98	19	78.95	84.21		0.894614	0.00112701
mmu-miR-504-3p		circ_946	166	-30.11	20	75	80		SLC22A15	172	-30.48	21	76.19	80.95		0.803326	0.00911066
mmu-miR-504-3p		circ_946	166	-30.11	20	75	80		FAM63A	168	-30.9	21	76.19	76.19		0.839841	0.00461137
mmu-miR-504-3p		circ_946	166	-30.11	20	75	80		TRMT61A	188	-40.52	19	89.47	94.74		0.839841	0.00461137
mmu-miR-504-3p		circ_946	166	-30.11	20	75	80		TAF5L	167	-30.71	21	76.19	76.19		0.894614	0.00112701
mmu-miR-504-3p		circ_946	166	-30.11	20	75	80		SSH2	170	-31.41	19	78.95	84.21		0.748554	0.0203173
mmu-miR-504-3p		circ_946	166	-30.11	20	75	80		LPIN3	175	-31.41	19	78.95	89.47		0.839841	0.00461137
mmu-miR-504-3p		circ_946	166	-30.11	20	75	80		FRRS1	169	-30.21	18	83.33	83.33		0.858099	0.00307611
mmu-miR-5110		circ_946	179	-33.82	22	72.73	86.36		WIPF1	177	-32.09	25	76	76		0.858099	0.00307611
mmu-miR-5110		circ_946	179	-33.82	22	72.73	86.36		AMPD3	177	-37.63	22	77.27	81.82		0.858099	0.00307611
mmu-miR-5110		circ_946	179	-33.82	22	72.73	86.36		MYO18A	184	-41.05	20	85	90		0.858099	0.00307611
mmu-miR-5110		circ_946	179	-33.82	22	72.73	86.36		PTGS1	170	-32.35	18	77.78	88.89		0.894614	0.00112701
mmu-miR-5110		circ_946	179	-33.82	22	72.73	86.36		DIAPH1	187	-38.86	23	78.26	86.96		0.803326	0.00911066
mmu-miR-5110		circ_946	179	-33.82	22	72.73	86.36		LIMK1	178	-35.93	24	75	79.17		0.858099	0.00307611
mmu-miR-5110		circ_946	179	-33.82	22	72.73	86.36		BAX	161	-31.07	19	73.68	78.95		0.785069	0.0121946
mmu-miR-5110		circ_946	179	-33.82	22	72.73	86.36		ZFP697	173	-33.19	21	76.19	80.95		0.894614	0.00112701
mmu-miR-5110		circ_946	179	-33.82	22	72.73	86.36		RPS6KA4	172	-32.99	22	72.73	81.82		0.894614	0.00112701
mmu-miR-5110		circ_946	179	-33.82	22	72.73	86.36		ALPL	169	-30.46	24	70.83	75		0.858099	0.00307611
mmu-miR-5110		circ_946	179	-33.82	22	72.73	86.36		VCAN	181	-35.8	21	80.95	85.71		0.894614	0.00112701
mmu-miR-5110		circ_946	179	-33.82	22	72.73	86.36		SLC29A1	178	-31.27	25	72	80		0.839841	0.00461137
mmu-miR-5110		circ_946	179	-33.82	22	72.73	86.36		PAPPA2	182	-36.15	25	76	80		0.785069	0.0121946
mmu-miR-5110		circ_946	179	-33.82	22	72.73	86.36		NRP2	173	-34.87	22	72.73	81.82		0.894614	0.00112701
mmu-miR-5110		circ_946	179	-33.82	22	72.73	86.36		PRMT3	176	-36.61	21	76.19	85.71		0.839841	0.00461137
mmu-miR-5110		circ_946	179	-33.82	22	72.73	86.36		ARHGDIB	165	-31.63	20	70	80		0.785069	0.0121946
mmu-miR-5110		circ_946	179	-33.82	22	72.73	86.36		SIPA1	177	-35.89	23	78.26	78.26		0.894614	0.00112701
mmu-miR-5110		circ_946	179	-33.82	22	72.73	86.36		ITPRIPL2	163	-30.47	19	73.68	78.95		0.839841	0.00461137
mmu-miR-5110		circ_946	179	-33.82	22	72.73	86.36		ADAMTS9	185	-39.97	21	80.95	90.48		0.894614	0.00112701
mmu-miR-5110		circ_946	179	-33.82	22	72.73	86.36		CIAPIN1	170	-31.05	20	80	80		0.803326	0.00911066
mmu-miR-5110		circ_946	179	-33.82	22	72.73	86.36		IER5L	174	-36.61	21	71.43	85.71		0.803326	0.00911066
mmu-miR-5110		circ_946	179	-33.82	22	72.73	86.36		SOX13	175	-36.2	23	73.91	78.26		0.785069	0.0121946
mmu-miR-5110		circ_946	179	-33.82	22	72.73	86.36		BGN	182	-33.81	26	76.92	76.92		0.803326	0.00911066
mmu-miR-5110		circ_946	179	-33.82	22	72.73	86.36		SH3RF1	174	-36.18	22	72.73	81.82		0.821584	0.00660266
mmu-miR-5110		circ_946	179	-33.82	22	72.73	86.36		EPS8	172	-32.81	22	72.73	81.82		0.785069	0.0121946
mmu-miR-5110		circ_946	179	-33.82	22	72.73	86.36		TOP1	177	-40.16	23	73.91	82.61		0.858099	0.00307611
mmu-miR-5110		circ_946	179	-33.82	22	72.73	86.36		FMNL2	173	-35.53	22	72.73	81.82		0.803326	0.00911066
mmu-miR-5110		circ_946	179	-33.82	22	72.73	86.36		VASP	169	-33.82	21	76.19	76.19		0.894614	0.00112701
mmu-miR-5110		circ_946	179	-33.82	22	72.73	86.36		FGFR1	176	-32.51	22	72.73	86.36		0.858099	0.00307611
mmu-miR-5110		circ_946	179	-33.82	22	72.73	86.36		HMGA2	183	-35.64	24	79.17	79.17		0.858099	0.00307611
mmu-miR-5110		circ_946	179	-33.82	22	72.73	86.36		WNK4	175	-36.49	24	75	75		0.785069	0.0121946
mmu-miR-5110		circ_946	179	-33.82	22	72.73	86.36		PPAT	168	-30.21	21	71.43	80.95		0.730297	0.0254636
mmu-miR-5110		circ_946	179	-33.82	22	72.73	86.36		CHD9	186	-35.22	22	81.82	86.36		0.858099	0.00307611
mmu-miR-5110		circ_946	179	-33.82	22	72.73	86.36		RARB	181	-35.04	22	81.82	81.82		0.894614	0.00112701
mmu-miR-5110		circ_946	179	-33.82	22	72.73	86.36		ZCCHC4	181	-41.62	22	81.82	81.82		0.894614	0.00112701
mmu-miR-5110		circ_946	179	-33.82	22	72.73	86.36		HIPK2	171	-31.55	22	77.27	77.27		0.821584	0.00660266
mmu-miR-5110		circ_946	179	-33.82	22	72.73	86.36		EPAS1	181	-36.78	21	80.95	85.71		0.803326	0.00911066
mmu-miR-5110		circ_946	179	-33.82	22	72.73	86.36		SLC6A6	165	-30.43	21	71.43	76.19		0.858099	0.00307611
mmu-miR-5110		circ_946	179	-33.82	22	72.73	86.36		ARNTL	176	-33.39	22	77.27	81.82		0.858099	0.00307611
mmu-miR-5110		circ_946	179	-33.82	22	72.73	86.36		INF2	178	-33.1	23	78.26	78.26		0.821584	0.00660266
mmu-miR-5110		circ_946	179	-33.82	22	72.73	86.36		LRRC8D	181	-35.24	23	78.26	82.61		0.839841	0.00461137
mmu-miR-5110		circ_946	179	-33.82	22	72.73	86.36		PRG4	181	-34.16	24	79.17	79.17		0.712039	0.0314
mmu-miR-5110		circ_946	179	-33.82	22	72.73	86.36		SOX4	182	-36.95	23	73.91	86.96		0.858099	0.00307611
mmu-miR-5110		circ_2313	170	-32.42	24	70.83	75		WIPF1	177	-32.09	25	76	76		0.830628	0.00555542
mmu-miR-5110		circ_2313	170	-32.42	24	70.83	75		AMPD3	177	-37.63	22	77.27	81.82		0.830628	0.00555542
mmu-miR-5110		circ_2313	170	-32.42	24	70.83	75		MYO18A	184	-41.05	20	85	90		0.779773	0.0132052
mmu-miR-5110		circ_2313	170	-32.42	24	70.83	75		PTGS1	170	-32.35	18	77.78	88.89		0.813676	0.00762197
mmu-miR-5110		circ_2313	170	-32.42	24	70.83	75		DIAPH1	187	-38.86	23	78.26	86.96		0.813676	0.00762197
mmu-miR-5110		circ_2313	170	-32.42	24	70.83	75		LIMK1	178	-35.93	24	75	79.17		0.847579	0.00390855
mmu-miR-5110		circ_2313	170	-32.42	24	70.83	75		BAX	161	-31.07	19	73.68	78.95		0.762821	0.016814
mmu-miR-5110		circ_2313	170	-32.42	24	70.83	75		ZFP697	173	-33.19	21	76.19	80.95		0.864531	0.00263237
mmu-miR-5110		circ_2313	170	-32.42	24	70.83	75		RPS6KA4	172	-32.99	22	72.73	81.82		0.813676	0.00762197
mmu-miR-5110		circ_2313	170	-32.42	24	70.83	75		ALPL	169	-30.46	24	70.83	75		0.864531	0.00263237
mmu-miR-5110		circ_2313	170	-32.42	24	70.83	75		VCAN	181	-35.8	21	80.95	85.71		0.813676	0.00762197
mmu-miR-5110		circ_2313	170	-32.42	24	70.83	75		SLC29A1	178	-31.27	25	72	80		0.796725	0.0101563
mmu-miR-5110		circ_2313	170	-32.42	24	70.83	75		PAPPA2	182	-36.15	25	76	80		0.915386	0.000533717
mmu-miR-5110		circ_2313	170	-32.42	24	70.83	75		NRP2	173	-34.87	22	72.73	81.82		0.762821	0.016814
mmu-miR-5110		circ_2313	170	-32.42	24	70.83	75		PRMT3	176	-36.61	21	76.19	85.71		0.864531	0.00263237
mmu-miR-5110		circ_2313	170	-32.42	24	70.83	75		ARHGDIB	165	-31.63	20	70	80		0.847579	0.00390855
mmu-miR-5110		circ_2313	170	-32.42	24	70.83	75		SIPA1	177	-35.89	23	78.26	78.26		0.830628	0.00555542
mmu-miR-5110		circ_2313	170	-32.42	24	70.83	75		ITPRIPL2	163	-30.47	19	73.68	78.95		0.813676	0.00762197
mmu-miR-5110		circ_2313	170	-32.42	24	70.83	75		ADAMTS9	185	-39.97	21	80.95	90.48		0.813676	0.00762197
mmu-miR-5110		circ_2313	170	-32.42	24	70.83	75		CIAPIN1	170	-31.05	20	80	80		0.762821	0.016814
mmu-miR-5110		circ_2313	170	-32.42	24	70.83	75		SOX13	175	-36.2	23	73.91	78.26		0.830628	0.00555542
mmu-miR-5110		circ_2313	170	-32.42	24	70.83	75		BGN	182	-33.81	26	76.92	76.92		0.813676	0.00762197
mmu-miR-5110		circ_2313	170	-32.42	24	70.83	75		SH3RF1	174	-36.18	22	72.73	81.82		0.779773	0.0132052
mmu-miR-5110		circ_2313	170	-32.42	24	70.83	75		EPS8	172	-32.81	22	72.73	81.82		0.847579	0.00390855
mmu-miR-5110		circ_2313	170	-32.42	24	70.83	75		TOP1	177	-40.16	23	73.91	82.61		0.864531	0.00263237
mmu-miR-5110		circ_2313	170	-32.42	24	70.83	75		FMNL2	173	-35.53	22	72.73	81.82		0.847579	0.00390855
mmu-miR-5110		circ_2313	170	-32.42	24	70.83	75		VASP	169	-33.82	21	76.19	76.19		0.898434	0.000994195
mmu-miR-5110		circ_2313	170	-32.42	24	70.83	75		FGFR1	176	-32.51	22	72.73	86.36		0.830628	0.00555542
mmu-miR-5110		circ_2313	170	-32.42	24	70.83	75		HMGA2	183	-35.64	24	79.17	79.17		0.830628	0.00555542
mmu-miR-5110		circ_2313	170	-32.42	24	70.83	75		WNK4	175	-36.49	24	75	75		0.74587	0.0210263
mmu-miR-5110		circ_2313	170	-32.42	24	70.83	75		PPAT	168	-30.21	21	71.43	80.95		0.728918	0.0258836
mmu-miR-5110		circ_2313	170	-32.42	24	70.83	75		CHD9	186	-35.22	22	81.82	86.36		0.762821	0.016814
mmu-miR-5110		circ_2313	170	-32.42	24	70.83	75		RARB	181	-35.04	22	81.82	81.82		0.762821	0.016814
mmu-miR-5110		circ_2313	170	-32.42	24	70.83	75		ZCCHC4	181	-41.62	22	81.82	81.82		0.864531	0.00263237
mmu-miR-5110		circ_2313	170	-32.42	24	70.83	75		HIPK2	171	-31.55	22	77.27	77.27		0.779773	0.0132052
mmu-miR-5110		circ_2313	170	-32.42	24	70.83	75		EPAS1	181	-36.78	21	80.95	85.71		0.847579	0.00390855
mmu-miR-5110		circ_2313	170	-32.42	24	70.83	75		SLC6A6	165	-30.43	21	71.43	76.19		0.830628	0.00555542
mmu-miR-5110		circ_2313	170	-32.42	24	70.83	75		ARNTL	176	-33.39	22	77.27	81.82		0.881483	0.00167742
mmu-miR-5110		circ_2313	170	-32.42	24	70.83	75		INF2	178	-33.1	23	78.26	78.26		0.779773	0.0132052
mmu-miR-5110		circ_2313	170	-32.42	24	70.83	75		LRRC8D	181	-35.24	23	78.26	82.61		0.864531	0.00263237
mmu-miR-5110		circ_2313	170	-32.42	24	70.83	75		PRG4	181	-34.16	24	79.17	79.17		0.779773	0.0132052
mmu-miR-5110		circ_2313	170	-32.42	24	70.83	75		SOX4	182	-36.95	23	73.91	86.96		0.779773	0.0132052
mmu-miR-5110		circ_915	186	-36.64	22	81.82	86.36		WIPF1	177	-32.09	25	76	76		0.800757	0.00950848
mmu-miR-5110		circ_915	186	-36.64	22	81.82	86.36		AMPD3	177	-37.63	22	77.27	81.82		0.800757	0.00950848
mmu-miR-5110		circ_915	186	-36.64	22	81.82	86.36		MYO18A	184	-41.05	20	85	90		0.783349	0.0125168
mmu-miR-5110		circ_915	186	-36.64	22	81.82	86.36		PTGS1	170	-32.35	18	77.78	88.89		0.835573	0.00503382
mmu-miR-5110		circ_915	186	-36.64	22	81.82	86.36		DIAPH1	187	-38.86	23	78.26	86.96		0.861684	0.00282288
mmu-miR-5110		circ_915	186	-36.64	22	81.82	86.36		LIMK1	178	-35.93	24	75	79.17		0.783349	0.0125168
mmu-miR-5110		circ_915	186	-36.64	22	81.82	86.36		BAX	161	-31.07	19	73.68	78.95		0.922612	0.000393338
mmu-miR-5110		circ_915	186	-36.64	22	81.82	86.36		ZFP697	173	-33.19	21	76.19	80.95		0.835573	0.00503382
mmu-miR-5110		circ_915	186	-36.64	22	81.82	86.36		RPS6KA4	172	-32.99	22	72.73	81.82		0.792053	0.0109431
mmu-miR-5110		circ_915	186	-36.64	22	81.82	86.36		ALPL	169	-30.46	24	70.83	75		0.800757	0.00950848
mmu-miR-5110		circ_915	186	-36.64	22	81.82	86.36		VCAN	181	-35.8	21	80.95	85.71		0.835573	0.00503382
mmu-miR-5110		circ_915	186	-36.64	22	81.82	86.36		SLC29A1	178	-31.27	25	72	80		0.8965	0.00105998
mmu-miR-5110		circ_915	186	-36.64	22	81.82	86.36		PAPPA2	182	-36.15	25	76	80		0.844277	0.0041988
mmu-miR-5110		circ_915	186	-36.64	22	81.82	86.36		NRP2	173	-34.87	22	72.73	81.82		0.818165	0.00703117
mmu-miR-5110		circ_915	186	-36.64	22	81.82	86.36		PRMT3	176	-36.61	21	76.19	85.71		0.783349	0.0125168
mmu-miR-5110		circ_915	186	-36.64	22	81.82	86.36		ARHGDIB	165	-31.63	20	70	80		0.844277	0.0041988
mmu-miR-5110		circ_915	186	-36.64	22	81.82	86.36		SIPA1	177	-35.89	23	78.26	78.26		0.818165	0.00703117
mmu-miR-5110		circ_915	186	-36.64	22	81.82	86.36		ITPRIPL2	163	-30.47	19	73.68	78.95		0.765942	0.0161057
mmu-miR-5110		circ_915	186	-36.64	22	81.82	86.36		ADAMTS9	185	-39.97	21	80.95	90.48		0.835573	0.00503382
mmu-miR-5110		circ_915	186	-36.64	22	81.82	86.36		CIAPIN1	170	-31.05	20	80	80		0.940019	0.000164049
mmu-miR-5110		circ_915	186	-36.64	22	81.82	86.36		IER5L	174	-36.61	21	71.43	85.71		0.940019	0.000164049
mmu-miR-5110		circ_915	186	-36.64	22	81.82	86.36		BGN	182	-33.81	26	76.92	76.92		0.861684	0.00282288
mmu-miR-5110		circ_915	186	-36.64	22	81.82	86.36		SH3RF1	174	-36.18	22	72.73	81.82		0.705015	0.0339046
mmu-miR-5110		circ_915	186	-36.64	22	81.82	86.36		EPS8	172	-32.81	22	72.73	81.82		0.844277	0.0041988
mmu-miR-5110		circ_915	186	-36.64	22	81.82	86.36		TOP1	177	-40.16	23	73.91	82.61		0.800757	0.00950848
mmu-miR-5110		circ_915	186	-36.64	22	81.82	86.36		FMNL2	173	-35.53	22	72.73	81.82		0.861684	0.00282288
mmu-miR-5110		circ_915	186	-36.64	22	81.82	86.36		VASP	169	-33.82	21	76.19	76.19		0.835573	0.00503382
mmu-miR-5110		circ_915	186	-36.64	22	81.82	86.36		FGFR1	176	-32.51	22	72.73	86.36		0.800757	0.00950848
mmu-miR-5110		circ_915	186	-36.64	22	81.82	86.36		HMGA2	183	-35.64	24	79.17	79.17		0.800757	0.00950848
mmu-miR-5110		circ_915	186	-36.64	22	81.82	86.36		WNK4	175	-36.49	24	75	75		0.809461	0.0082066
mmu-miR-5110		circ_915	186	-36.64	22	81.82	86.36		PPAT	168	-30.21	21	71.43	80.95		0.870388	0.0022686
mmu-miR-5110		circ_915	186	-36.64	22	81.82	86.36		RARB	181	-35.04	22	81.82	81.82		0.818165	0.00703117
mmu-miR-5110		circ_915	186	-36.64	22	81.82	86.36		ZCCHC4	181	-41.62	22	81.82	81.82		0.835573	0.00503382
mmu-miR-5110		circ_915	186	-36.64	22	81.82	86.36		HIPK2	171	-31.55	22	77.27	77.27		0.705015	0.0339046
mmu-miR-5110		circ_915	186	-36.64	22	81.82	86.36		EPAS1	181	-36.78	21	80.95	85.71		0.861684	0.00282288
mmu-miR-5110		circ_915	186	-36.64	22	81.82	86.36		SLC6A6	165	-30.43	21	71.43	76.19		0.800757	0.00950848
mmu-miR-5110		circ_915	186	-36.64	22	81.82	86.36		ARNTL	176	-33.39	22	77.27	81.82		0.800757	0.00950848
mmu-miR-5110		circ_915	186	-36.64	22	81.82	86.36		INF2	178	-33.1	23	78.26	78.26		0.705015	0.0339046
mmu-miR-5110		circ_915	186	-36.64	22	81.82	86.36		LRRC8D	181	-35.24	23	78.26	82.61		0.783349	0.0125168
mmu-miR-5110		circ_915	186	-36.64	22	81.82	86.36		PRG4	181	-34.16	24	79.17	79.17		0.826869	0.00597575
mmu-miR-5110		circ_915	186	-36.64	22	81.82	86.36		SOX4	182	-36.95	23	73.91	86.96		0.879092	0.00179449
mmu-miR-5110		circ_1097	175	-34.29	26	73.08	73.08		WIPF1	177	-32.09	25	76	76		0.762821	0.016814
mmu-miR-5110		circ_1097	175	-34.29	26	73.08	73.08		AMPD3	177	-37.63	22	77.27	81.82		0.762821	0.016814
mmu-miR-5110		circ_1097	175	-34.29	26	73.08	73.08		PTGS1	170	-32.35	18	77.78	88.89		0.779773	0.0132052
mmu-miR-5110		circ_1097	175	-34.29	26	73.08	73.08		DIAPH1	187	-38.86	23	78.26	86.96		0.847579	0.00390855
mmu-miR-5110		circ_1097	175	-34.29	26	73.08	73.08		RPS6KA4	172	-32.99	22	72.73	81.82		0.796725	0.0101563
mmu-miR-5110		circ_1097	175	-34.29	26	73.08	73.08		ALPL	169	-30.46	24	70.83	75		0.762821	0.016814
mmu-miR-5110		circ_1097	175	-34.29	26	73.08	73.08		VCAN	181	-35.8	21	80.95	85.71		0.779773	0.0132052
mmu-miR-5110		circ_1097	175	-34.29	26	73.08	73.08		SLC29A1	178	-31.27	25	72	80		0.813676	0.00762197
mmu-miR-5110		circ_1097	175	-34.29	26	73.08	73.08		PAPPA2	182	-36.15	25	76	80		0.74587	0.0210263
mmu-miR-5110		circ_1097	175	-34.29	26	73.08	73.08		PRMT3	176	-36.61	21	76.19	85.71		0.711967	0.0314253
mmu-miR-5110		circ_1097	175	-34.29	26	73.08	73.08		ARHGDIB	165	-31.63	20	70	80		0.796725	0.0101563
mmu-miR-5110		circ_1097	175	-34.29	26	73.08	73.08		ADAMTS9	185	-39.97	21	80.95	90.48		0.728918	0.0258836
mmu-miR-5110		circ_1097	175	-34.29	26	73.08	73.08		CIAPIN1	170	-31.05	20	80	80		0.711967	0.0314253
mmu-miR-5110		circ_1097	175	-34.29	26	73.08	73.08		IER5L	174	-36.61	21	71.43	85.71		0.762821	0.016814
mmu-miR-5110		circ_1097	175	-34.29	26	73.08	73.08		BGN	182	-33.81	26	76.92	76.92		0.847579	0.00390855
mmu-miR-5110		circ_1097	175	-34.29	26	73.08	73.08		EPS8	172	-32.81	22	72.73	81.82		0.796725	0.0101563
mmu-miR-5110		circ_1097	175	-34.29	26	73.08	73.08		TOP1	177	-40.16	23	73.91	82.61		0.762821	0.016814
mmu-miR-5110		circ_1097	175	-34.29	26	73.08	73.08		FMNL2	173	-35.53	22	72.73	81.82		0.847579	0.00390855
mmu-miR-5110		circ_1097	175	-34.29	26	73.08	73.08		FGFR1	176	-32.51	22	72.73	86.36		0.762821	0.016814
mmu-miR-5110		circ_1097	175	-34.29	26	73.08	73.08		HMGA2	183	-35.64	24	79.17	79.17		0.762821	0.016814
mmu-miR-5110		circ_1097	175	-34.29	26	73.08	73.08		PPAT	168	-30.21	21	71.43	80.95		0.728918	0.0258836
mmu-miR-5110		circ_1097	175	-34.29	26	73.08	73.08		CHD9	186	-35.22	22	81.82	86.36		0.728918	0.0258836
mmu-miR-5110		circ_1097	175	-34.29	26	73.08	73.08		EPAS1	181	-36.78	21	80.95	85.71		0.847579	0.00390855
mmu-miR-5110		circ_1097	175	-34.29	26	73.08	73.08		SLC6A6	165	-30.43	21	71.43	76.19		0.762821	0.016814
mmu-miR-5110		circ_1097	175	-34.29	26	73.08	73.08		LRRC8D	181	-35.24	23	78.26	82.61		0.711967	0.0314253
mmu-miR-5110		circ_1097	175	-34.29	26	73.08	73.08		PRG4	181	-34.16	24	79.17	79.17		0.864531	0.00263237
mmu-miR-5110		circ_3118	173	-30.26	22	72.73	81.82		NRP2	173	-34.87	22	72.73	81.82		0.703005	0.0346443
mmu-miR-5110		circ_3118	173	-30.26	22	72.73	81.82		SIPA1	177	-35.89	23	78.26	78.26		0.703005	0.0346443
mmu-miR-5110		circ_3118	173	-30.26	22	72.73	81.82		RARB	181	-35.04	22	81.82	81.82		0.703005	0.0346443
mmu-miR-5120		circ_167	172	-33.16	23	73.91	78.26		CMTM3	183	-33.03	21	85.71	85.71		0.894614	0.00112701
mmu-miR-5133		circ_1983	175	-37.79	19	84.21	84.21		MB21D2	166	-32.56	20	75	80		0.866667	0.00450838
mmu-miR-5133		circ_1983	175	-37.79	19	84.21	84.21		PITPNA	169	-30.91	18	77.78	88.89		0.75	0.0254905
mmu-miR-5133		circ_1983	175	-37.79	19	84.21	84.21		IER5L	169	-32.49	18	77.78	88.89		0.85	0.00607363
mmu-miR-5133		circ_1983	175	-37.79	19	84.21	84.21		S1PR2	174	-36.73	19	84.21	84.21		0.75	0.0254905
mmu-miR-5133		circ_1983	175	-37.79	19	84.21	84.21		SQRDL	166	-34.24	19	78.95	78.95		0.783333	0.0172233
mmu-miR-5133		circ_1983	175	-37.79	19	84.21	84.21		FNIP2	162	-30.17	19	73.68	78.95		0.75	0.0254905
mmu-miR-532-3p		circ_2570	161	-34.16	18	77.78	77.78		ITPRIPL2	165	-31.74	18	77.78	83.33		0.72804	0.0261536
mmu-miR-532-3p		circ_2570	161	-34.16	18	77.78	77.78		NUFIP1	165	-30.34	18	77.78	83.33		0.72804	0.0261536
mmu-miR-532-3p		circ_2570	161	-34.16	18	77.78	77.78		RRP9	162	-32.13	21	71.43	76.19		0.811723	0.0078893
mmu-miR-532-3p		circ_2570	161	-34.16	18	77.78	77.78		GRWD1	168	-30.37	20	70	85		0.744776	0.0213197
mmu-miR-532-3p		circ_2570	161	-34.16	18	77.78	77.78		ELOVL6	168	-33.55	21	76.19	76.19		0.861932	0.00280593
mmu-miR-5621-5p		circ_3118	176	-34.4	20	80	85		TRIOBP	180	-41.31	20	85	85		0.752512	0.0193012
mmu-miR-5627-5p		circ_779	160	-30.39	20	70	75		ZFP217	170	-35.61	20	80	80		0.785069	0.0121946
mmu-miR-5627-5p		circ_779	160	-30.39	20	70	75		CBX5	171	-30.72	20	75	85		0.839841	0.00461137
mmu-miR-5627-5p		circ_779	160	-30.39	20	70	75		SQRDL	170	-30.28	18	83.33	83.33		0.912871	0.000589839
mmu-miR-5627-5p		circ_779	160	-30.39	20	70	75		MTA2	167	-38.53	19	73.68	84.21		0.748554	0.0203173
mmu-miR-5627-5p		circ_779	160	-30.39	20	70	75		NAV1	171	-35.44	21	76.19	80.95		0.803326	0.00911066
mmu-miR-5627-5p		circ_779	160	-30.39	20	70	75		MYO18A	167	-30.1	21	71.43	80.95		0.748554	0.0203173
mmu-miR-5627-5p		circ_779	160	-30.39	20	70	75		INF2	172	-33.03	20	75	85		0.712039	0.0314
mmu-miR-5627-5p		circ_779	160	-30.39	20	70	75		MAP3K14	174	-34.44	19	78.95	89.47		0.858099	0.00307611
mmu-miR-5627-5p		circ_779	160	-30.39	20	70	75		PACSIN2	166	-36.85	23	73.91	78.26		0.858099	0.00307611
mmu-miR-5627-5p		circ_779	160	-30.39	20	70	75		AMPD3	163	-32.15	21	71.43	80.95		0.803326	0.00911066
mmu-miR-574-5p		circ_1078	185	-32.67	22	77.27	90.91		TNFRSF1B	185	-35.73	20	80	95		0.858099	0.00307611
mmu-miR-574-5p		circ_1078	185	-32.67	22	77.27	90.91		KRAS	189	-35.79	21	85.71	90.48		0.730297	0.0254636
mmu-miR-574-5p		circ_1078	185	-32.67	22	77.27	90.91		FRMD4A	192	-37.84	19	94.74	94.74		0.858099	0.00307611
mmu-miR-574-5p		circ_1078	185	-32.67	22	77.27	90.91		LIMK1	177	-33.21	20	75	90		0.858099	0.00307611
mmu-miR-574-5p		circ_1078	185	-32.67	22	77.27	90.91		SIPA1	171	-31.95	19	73.68	89.47		0.821584	0.00660266
mmu-miR-574-5p		circ_1078	185	-32.67	22	77.27	90.91		NUFIP1	177	-32.09	20	70	95		0.821584	0.00660266
mmu-miR-574-5p		circ_1078	185	-32.67	22	77.27	90.91		NAV2	176	-30.29	21	71.43	90.48		0.858099	0.00307611
mmu-miR-574-5p		circ_1078	185	-32.67	22	77.27	90.91		E2F8	197	-41.33	20	95	95		0.858099	0.00307611
mmu-miR-574-5p		circ_1078	185	-32.67	22	77.27	90.91		DOCK5	193	-35.67	20	90	95		0.858099	0.00307611
mmu-miR-615-3p		circ_3118	174	-34.7	18	83.33	88.89		TRMT61A	171	-34.44	19	73.68	89.47		0.772315	0.0147213
mmu-miR-615-5p		circ_946	163	-31.43	20	70	80		MTHFD2L	176	-41.38	24	75	79.17		0.894614	0.00112701
mmu-miR-615-5p		circ_946	163	-31.43	20	70	80		ZFP36L1	163	-33.06	20	70	80		0.858099	0.00307611
mmu-miR-615-5p		circ_946	163	-31.43	20	70	80		MTA2	164	-34.17	18	77.78	83.33		0.858099	0.00307611
mmu-miR-615-5p		circ_946	163	-31.43	20	70	80		MAP3K6	171	-34.47	22	77.27	77.27		0.803326	0.00911066
mmu-miR-615-5p		circ_946	163	-31.43	20	70	80		SORCS1	165	-31.23	19	73.68	84.21		0.858099	0.00307611
mmu-miR-615-5p		circ_946	163	-31.43	20	70	80		EMILIN2	164	-31.93	19	73.68	78.95		0.839841	0.00461137
mmu-miR-615-5p		circ_946	163	-31.43	20	70	80		PPAT	166	-31.4	19	73.68	84.21		0.730297	0.0254636
mmu-miR-615-5p		circ_946	163	-31.43	20	70	80		FBXL7	180	-39.43	21	80.95	85.71		0.839841	0.00461137
mmu-miR-615-5p		circ_946	163	-31.43	20	70	80		SLC6A6	178	-41.36	20	85	85		0.858099	0.00307611
mmu-miR-6364		circ_1983	161	-30.78	20	70	85		PWP2	167	-31.09	20	75	80		0.75	0.0254905
mmu-miR-6367		circ_915	174	-30.28	21	80.95	80.95		AMPD3	166	-30.68	22	77.27	77.27		0.800757	0.00950848
mmu-miR-6367		circ_915	174	-30.28	21	80.95	80.95		INF2	162	-31.18	19	73.68	78.95		0.705015	0.0339046
mmu-miR-6367		circ_915	174	-30.28	21	80.95	80.95		LOXL3	171	-33.16	20	75	85		0.818165	0.00703117
mmu-miR-6367		circ_2313	175	-34.7	19	78.95	89.47		AMPD3	166	-30.68	22	77.27	77.27		0.830628	0.00555542
mmu-miR-6367		circ_2313	175	-34.7	19	78.95	89.47		INF2	162	-31.18	19	73.68	78.95		0.779773	0.0132052
mmu-miR-6367		circ_2313	175	-34.7	19	78.95	89.47		LOXL3	171	-33.16	20	75	85		0.813676	0.00762197
mmu-miR-6368		circ_1983	171	-32.69	19	78.95	84.21		IFI204	179	-36.17	19	84.21	89.47		0.9	0.00202822
mmu-miR-6368		circ_1983	171	-32.69	19	78.95	84.21		OASL1	171	-30.82	20	80	80		0.85	0.00607363
mmu-miR-6368		circ_1983	171	-32.69	19	78.95	84.21		MAP3K6	166	-32.31	22	72.73	81.82		0.733333	0.0311232
mmu-miR-6368		circ_1983	171	-32.69	19	78.95	84.21		TRIOBP	171	-30.05	18	77.78	88.89		0.766667	0.02139
mmu-miR-6368		circ_1983	171	-32.69	19	78.95	84.21		LRRFIP1	167	-30.6	24	70.83	75		0.766667	0.02139
mmu-miR-6368		circ_1983	171	-32.69	19	78.95	84.21		ADAMTS9	170	-30.43	19	73.68	89.47		0.716667	0.0368662
mmu-miR-6368		circ_1983	171	-32.69	19	78.95	84.21		S1PR2	175	-36.5	19	78.95	89.47		0.75	0.0254905
mmu-miR-6368		circ_1983	171	-32.69	19	78.95	84.21		ITPRIPL2	167	-30.27	19	73.68	84.21		0.75	0.0254905
mmu-miR-6368		circ_1983	171	-32.69	19	78.95	84.21		XPR1	166	-32.64	18	77.78	83.33		0.766667	0.02139
mmu-miR-6393		circ_1983	164	-30.99	21	71.43	76.19		TSPAN5	167	-30.18	21	76.19	76.19		0.783333	0.0172233
mmu-miR-665-5p		circ_167	176	-32.93	24	75	79.17		PREB	166	-30.47	25	72	72		0.803326	0.00911066
mmu-miR-665-5p		circ_167	176	-32.93	24	75	79.17		GRAMD4	173	-30.59	24	70.83	79.17		0.785069	0.0121946
mmu-miR-665-5p		circ_167	176	-32.93	24	75	79.17		FAM63A	179	-33.06	24	75	79.17		0.785069	0.0121946
mmu-miR-665-5p		circ_167	176	-32.93	24	75	79.17		CBX5	171	-38.48	22	72.73	81.82		0.839841	0.00461137
mmu-miR-665-5p		circ_167	176	-32.93	24	75	79.17		NAV2	175	-31.05	24	70.83	79.17		0.803326	0.00911066
mmu-miR-665-5p		circ_167	176	-32.93	24	75	79.17		CMKLR1	182	-33.03	23	78.26	82.61		0.894614	0.00112701
mmu-miR-665-5p		circ_167	176	-32.93	24	75	79.17		SIPA1	180	-41.33	28	71.43	75		0.785069	0.0121946
mmu-miR-665-5p		circ_167	176	-32.93	24	75	79.17		FRMD4A	175	-40.25	30	70	73.33		0.803326	0.00911066
mmu-miR-665-5p		circ_1426	174	-30.73	21	80.95	80.95		PREB	166	-30.47	25	72	72		0.785069	0.0121946
mmu-miR-665-5p		circ_1426	174	-30.73	21	80.95	80.95		GRAMD4	173	-30.59	24	70.83	79.17		0.803326	0.00911066
mmu-miR-665-5p		circ_1426	174	-30.73	21	80.95	80.95		FAM63A	179	-33.06	24	75	79.17		0.803326	0.00911066
mmu-miR-665-5p		circ_1426	174	-30.73	21	80.95	80.95		CBX5	171	-38.48	22	72.73	81.82		0.748554	0.0203173
mmu-miR-665-5p		circ_1426	174	-30.73	21	80.95	80.95		NAV2	175	-31.05	24	70.83	79.17		0.785069	0.0121946
mmu-miR-665-5p		circ_1426	174	-30.73	21	80.95	80.95		CMKLR1	182	-33.03	23	78.26	82.61		0.748554	0.0203173
mmu-miR-665-5p		circ_1426	174	-30.73	21	80.95	80.95		SIPA1	180	-41.33	28	71.43	75		0.803326	0.00911066
mmu-miR-665-5p		circ_1426	174	-30.73	21	80.95	80.95		FRMD4A	175	-40.25	30	70	73.33		0.730297	0.0254636
mmu-miR-665-5p		circ_3592	179	-30.4	26	73.08	76.92		CBX5	171	-38.48	22	72.73	81.82		0.703005	0.0346443
mmu-miR-665-5p		circ_3592	179	-30.4	26	73.08	76.92		CMKLR1	182	-33.03	23	78.26	82.61		0.772315	0.0147213
mmu-miR-669k-5p		circ_167	199	-34.94	25	84	88		AMOTL1	195	-35.09	24	83.33	87.5		0.785069	0.0121946
mmu-miR-669k-5p		circ_167	199	-34.94	25	84	88		TRIOBP	190	-34	26	80.77	84.62		0.803326	0.00911066
mmu-miR-669k-5p		circ_2411	198	-37.09	23	86.96	91.3		AMOTL1	195	-35.09	24	83.33	87.5		0.830628	0.00555542
mmu-miR-669k-5p		circ_2411	198	-37.09	23	86.96	91.3		TRIOBP	190	-34	26	80.77	84.62		0.74587	0.0210263
mmu-miR-6715-3p		circ_2313	166	-30.9	18	77.78	83.33		NDUFAF4	170	-33.23	18	77.78	88.89		0.762821	0.016814
mmu-miR-6715-5p		circ_2411	174	-30.51	18	83.33	88.89		PKD2	177	-33.03	23	73.91	82.61		0.830628	0.00555542
mmu-miR-6908-3p		circ_93	170	-31.27	19	78.95	84.21		GOT1	176	-34.36	22	77.27	81.82		0.839841	0.00461137
mmu-miR-6909-5p		circ_1492	164	-30.47	19	73.68	78.95		S1PR2	184	-39.62	22	81.82	86.36		0.803326	0.00911066
mmu-miR-6909-5p		circ_1492	164	-30.47	19	73.68	78.95		FGD6	171	-30.76	22	72.73	81.82		0.894614	0.00112701
mmu-miR-6909-5p		circ_1492	164	-30.47	19	73.68	78.95		WDR46	171	-36.64	19	78.95	84.21		0.785069	0.0121946
mmu-miR-6909-5p		circ_1492	164	-30.47	19	73.68	78.95		PITPNA	170	-31.21	20	75	85		0.730297	0.0254636
mmu-miR-6910-5p		circ_2313	165	-31.63	22	77.27	77.27		EXOC3L4	175	-36.38	20	80	85		0.830628	0.00555542
mmu-miR-6910-5p		circ_2313	165	-31.63	22	77.27	77.27		S100A10	169	-32.88	23	73.91	73.91		0.74587	0.0210263
mmu-miR-6910-5p		circ_2313	165	-31.63	22	77.27	77.27		ETV4	163	-34.05	20	75	75		0.813676	0.00762197
mmu-miR-6910-5p		circ_2313	165	-31.63	22	77.27	77.27		FOXRED2	168	-30.93	22	72.73	77.27		0.847579	0.00390855
mmu-miR-6910-5p		circ_2313	165	-31.63	22	77.27	77.27		ADCY8	163	-30.89	20	70	80		0.74587	0.0210263
mmu-miR-6910-5p		circ_2313	165	-31.63	22	77.27	77.27		SIPA1	170	-33.77	21	76.19	80.95		0.830628	0.00555542
mmu-miR-6910-5p		circ_2313	165	-31.63	22	77.27	77.27		ACE	168	-31.3	21	71.43	80.95		0.864531	0.00263237
mmu-miR-6910-5p		circ_2313	165	-31.63	22	77.27	77.27		SSH2	175	-36.36	22	77.27	81.82		0.796725	0.0101563
mmu-miR-6910-5p		circ_2313	165	-31.63	22	77.27	77.27		TRIO	167	-32.98	21	76.19	76.19		0.864531	0.00263237
mmu-miR-6910-5p		circ_2313	165	-31.63	22	77.27	77.27		PELI2	165	-38.75	20	75	75		0.847579	0.00390855
mmu-miR-6911-5p		circ_167	176	-30.91	24	75	79.17		FMO2	168	-31.41	20	75	80		0.894614	0.00112701
mmu-miR-6911-5p		circ_167	176	-30.91	24	75	79.17		URB1	176	-35.78	22	72.73	86.36		0.803326	0.00911066
mmu-miR-6911-5p		circ_167	176	-30.91	24	75	79.17		SLC22A15	172	-33.54	19	73.68	89.47		0.858099	0.00307611
mmu-miR-6911-5p		circ_167	176	-30.91	24	75	79.17		CIAPIN1	172	-32.94	20	75	85		0.858099	0.00307611
mmu-miR-6911-5p		circ_167	176	-30.91	24	75	79.17		NAV2	180	-34.31	21	80.95	85.71		0.803326	0.00911066
mmu-miR-6911-5p		circ_167	176	-30.91	24	75	79.17		ZFP697	185	-36.54	25	80	80		0.839841	0.00461137
mmu-miR-6911-5p		circ_167	176	-30.91	24	75	79.17		ETV5	177	-31.58	22	72.73	86.36		0.803326	0.00911066
mmu-miR-6911-5p		circ_167	176	-30.91	24	75	79.17		RBM19	168	-31.8	22	72.73	77.27		0.803326	0.00911066
mmu-miR-6912-3p		circ_2313	173	-35.9	23	73.91	78.26		PREB	164	-33.36	27	70.37	74.07		0.830628	0.00555542
mmu-miR-6914-5p		circ_1492	170	-32.03	19	73.68	89.47		STAU1	180	-36.21	22	77.27	86.36		0.712039	0.0314
mmu-miR-6914-5p		circ_1492	170	-32.03	19	73.68	89.47		BCAR1	173	-37.38	22	77.27	77.27		0.730297	0.0254636
mmu-miR-6914-5p		circ_1492	170	-32.03	19	73.68	89.47		BCL2L1	176	-33.69	23	73.91	82.61		0.785069	0.0121946
mmu-miR-6914-5p		circ_1492	170	-32.03	19	73.68	89.47		CHKA	165	-31.5	21	71.43	76.19		0.785069	0.0121946
mmu-miR-6914-5p		circ_1492	170	-32.03	19	73.68	89.47		EPAS1	174	-34.15	21	80.95	80.95		0.858099	0.00307611
mmu-miR-6914-5p		circ_1492	170	-32.03	19	73.68	89.47		MAP4K4	174	-33.62	21	76.19	80.95		0.785069	0.0121946
mmu-miR-6914-5p		circ_1492	170	-32.03	19	73.68	89.47		ABHD2	169	-32.18	25	72	72		0.803326	0.00911066
mmu-miR-6914-5p		circ_1492	170	-32.03	19	73.68	89.47		NAV2	175	-33.54	21	80.95	80.95		0.803326	0.00911066
mmu-miR-6914-5p		circ_1492	170	-32.03	19	73.68	89.47		AIG1	178	-33.98	24	75	79.17		0.803326	0.00911066
mmu-miR-6914-5p		circ_1492	170	-32.03	19	73.68	89.47		ZFP697	181	-36.81	24	79.17	79.17		0.839841	0.00461137
mmu-miR-6914-5p		circ_1492	170	-32.03	19	73.68	89.47		TRIOBP	174	-35.7	24	75	75		0.803326	0.00911066
mmu-miR-6914-5p		circ_1492	170	-32.03	19	73.68	89.47		VASP	163	-30.06	19	73.68	78.95		0.839841	0.00461137
mmu-miR-6914-5p		circ_1492	170	-32.03	19	73.68	89.47		SDC4	168	-32.92	20	70	85		0.858099	0.00307611
mmu-miR-6914-5p		circ_1492	170	-32.03	19	73.68	89.47		ZCCHC4	171	-31.67	21	71.43	85.71		0.839841	0.00461137
mmu-miR-6914-5p		circ_1492	170	-32.03	19	73.68	89.47		CLEC1A	174	-30.19	25	72	76		0.912871	0.000589839
mmu-miR-6914-5p		circ_1492	170	-32.03	19	73.68	89.47		DDX39	173	-32.18	24	75	75		0.912871	0.000589839
mmu-miR-6914-5p		circ_1492	170	-32.03	19	73.68	89.47		SYT12	170	-31.66	23	73.91	73.91		0.858099	0.00307611
mmu-miR-6914-5p		circ_1492	170	-32.03	19	73.68	89.47		NMT2	174	-38.81	22	72.73	81.82		0.803326	0.00911066
mmu-miR-6915-5p		circ_1983	178	-30.1	24	75	79.17		RAI14	174	-30.35	25	72	76		0.783333	0.0172233
mmu-miR-6922-5p		circ_1983	166	-30.88	22	72.73	77.27		HTR1B	171	-36.17	21	76.19	80.95		0.794986	0.0104445
mmu-miR-6922-5p		circ_1983	166	-30.88	22	72.73	77.27		ATG7	165	-31.5	19	78.95	78.95		0.833333	0.0082672
mmu-miR-6922-5p		circ_1983	166	-30.88	22	72.73	77.27		TRMT6	179	-34.97	19	84.21	89.47		0.8	0.0138283
mmu-miR-6922-5p		circ_1983	166	-30.88	22	72.73	77.27		MAP3K14	166	-33.15	19	78.95	78.95		0.716667	0.0368662
mmu-miR-6923-3p		circ_2411	170	-32.63	19	78.95	84.21		DDX39	171	-34.22	20	75	85		0.847579	0.00390855
mmu-miR-6923-3p		circ_2411	170	-32.63	19	78.95	84.21		MAP4K4	175	-36.25	21	76.19	85.71		0.830628	0.00555542
mmu-miR-6923-3p		circ_2411	170	-32.63	19	78.95	84.21		FAM129B	171	-34.71	20	80	80		0.830628	0.00555542
mmu-miR-6923-3p		circ_2411	170	-32.63	19	78.95	84.21		NAV2	171	-37.13	18	77.78	88.89		0.813676	0.00762197
mmu-miR-6923-3p		circ_2411	170	-32.63	19	78.95	84.21		NRP2	166	-30.08	18	77.78	83.33		0.779773	0.0132052
mmu-miR-6923-3p		circ_2411	170	-32.63	19	78.95	84.21		SOX13	175	-33.86	18	83.33	88.89		0.779773	0.0132052
mmu-miR-6923-5p		circ_2400	180	-34.76	21	80.95	85.71		KCNK2	167	-32.79	20	75	80		0.752512	0.0193012
mmu-miR-6931-5p		circ_1983	175	-38.57	18	77.78	94.44		PTGIR	170	-35.62	18	77.78	88.89		0.783333	0.0172233
mmu-miR-6931-5p		circ_1983	175	-38.57	18	77.78	94.44		XPR1	179	-41.94	19	84.21	89.47		0.766667	0.02139
mmu-miR-6931-5p		circ_1983	175	-38.57	18	77.78	94.44		TRIO	171	-33.07	19	78.95	84.21		0.766667	0.02139
mmu-miR-6931-5p		circ_1983	175	-38.57	18	77.78	94.44		ZFP36L1	179	-36.53	19	78.95	94.74		0.8	0.0138283
mmu-miR-6931-5p		circ_1983	175	-38.57	18	77.78	94.44		CAMKK2	161	-30.02	18	77.78	77.78		0.716667	0.0368662
mmu-miR-6931-5p		circ_1983	175	-38.57	18	77.78	94.44		2019-09-09	167	-33.77	21	71.43	80.95		0.8	0.0138283
mmu-miR-6931-5p		circ_1983	175	-38.57	18	77.78	94.44		TSKU	174	-32.85	19	78.95	89.47		0.866667	0.00450838
mmu-miR-6931-5p		circ_1983	175	-38.57	18	77.78	94.44		NEK6	165	-31.74	18	72.22	88.89		0.783333	0.0172233
mmu-miR-6931-5p		circ_1983	175	-38.57	18	77.78	94.44		CARD6	166	-35.68	19	73.68	84.21		0.783333	0.0172233
mmu-miR-6931-5p		circ_1983	175	-38.57	18	77.78	94.44		MYO18A	170	-33.62	19	78.95	84.21		0.733333	0.0311232
mmu-miR-6931-5p		circ_1983	175	-38.57	18	77.78	94.44		CP	174	-35.61	18	77.78	94.44		0.783333	0.0172233
mmu-miR-6931-5p		circ_1983	175	-38.57	18	77.78	94.44		GAS7	162	-30.66	20	70	80		0.766667	0.02139
mmu-miR-6931-5p		circ_1983	175	-38.57	18	77.78	94.44		CDH13	167	-35.4	19	73.68	84.21		0.8	0.0138283
mmu-miR-6931-5p		circ_1983	175	-38.57	18	77.78	94.44		TM4SF1	167	-30.02	21	71.43	80.95		0.733333	0.0311232
mmu-miR-6931-5p		circ_1983	175	-38.57	18	77.78	94.44		BCAR1	166	-34.56	19	73.68	84.21		0.75	0.0254905
mmu-miR-6931-5p		circ_1983	175	-38.57	18	77.78	94.44		NAV1	167	-31.28	18	72.22	88.89		0.75	0.0254905
mmu-miR-6931-5p		circ_1983	175	-38.57	18	77.78	94.44		PHC2	169	-33.35	18	77.78	88.89		0.783333	0.0172233
mmu-miR-6931-5p		circ_1983	175	-38.57	18	77.78	94.44		TNFRSF1B	166	-31.78	19	73.68	84.21		0.733333	0.0311232
mmu-miR-6931-5p		circ_1983	175	-38.57	18	77.78	94.44		TMEM132B	174	-34.95	20	80	85		0.783333	0.0172233
mmu-miR-6931-5p		circ_1983	175	-38.57	18	77.78	94.44		WIPF1	166	-32.44	18	72.22	88.89		0.766667	0.02139
mmu-miR-6931-5p		circ_1983	175	-38.57	18	77.78	94.44		MBNL3	173	-37.48	18	83.33	88.89		0.8	0.0138283
mmu-miR-6931-5p		circ_1983	175	-38.57	18	77.78	94.44		VASP	166	-31.18	18	72.22	88.89		0.716667	0.0368662
mmu-miR-6931-5p		circ_1983	175	-38.57	18	77.78	94.44		ITGA5	167	-34.21	18	77.78	83.33		0.766667	0.02139
mmu-miR-6944-5p		circ_780	171	-34.53	21	71.43	85.71		NRP2	164	-30.03	20	70	80		0.858099	0.00307611
mmu-miR-6944-5p		circ_780	171	-34.53	21	71.43	85.71		AIG1	172	-31.2	21	71.43	85.71		0.894614	0.00112701
mmu-miR-6944-5p		circ_780	171	-34.53	21	71.43	85.71		RPF2	176	-32.37	22	77.27	81.82		0.858099	0.00307611
mmu-miR-6944-5p		circ_780	171	-34.53	21	71.43	85.71		UBXN2B	188	-41.88	20	85	95		0.858099	0.00307611
mmu-miR-6944-5p		circ_780	171	-34.53	21	71.43	85.71		WNK4	170	-31.38	19	78.95	84.21		0.858099	0.00307611
mmu-miR-6945-5p		circ_779	171	-31.17	19	78.95	84.21		WDR46	162	-39.45	24	70.83	79.17		0.785069	0.0121946
mmu-miR-6945-5p		circ_779	171	-31.17	19	78.95	84.21		MICALL2	176	-42.16	20	80	85		0.803326	0.00911066
mmu-miR-6945-5p		circ_779	171	-31.17	19	78.95	84.21		RAI14	174	-35.84	18	83.33	88.89		0.839841	0.00461137
mmu-miR-6945-5p		circ_779	171	-31.17	19	78.95	84.21		NAV1	168	-35.01	22	72.73	77.27		0.803326	0.00911066
mmu-miR-6945-5p		circ_779	171	-31.17	19	78.95	84.21		ITGB2	163	-31.83	20	70	80		0.858099	0.00307611
mmu-miR-6945-5p		circ_779	171	-31.17	19	78.95	84.21		NNMT	160	-30.86	19	73.68	78.95		0.803326	0.00911066
mmu-miR-6945-5p		circ_779	171	-31.17	19	78.95	84.21		HK2	162	-31.39	21	71.43	76.19		0.748554	0.0203173
mmu-miR-6945-5p		circ_779	171	-31.17	19	78.95	84.21		CLEC1A	167	-32.04	20	75	80		0.912871	0.000589839
mmu-miR-6945-5p		circ_779	171	-31.17	19	78.95	84.21		FRMD4A	164	-33.81	21	71.43	76.19		0.803326	0.00911066
mmu-miR-6945-5p		circ_779	171	-31.17	19	78.95	84.21		DOK1	164	-30.01	20	75	75		0.894614	0.00112701
mmu-miR-6945-5p		circ_779	171	-31.17	19	78.95	84.21		ABCF2	164	-30.72	18	77.78	83.33		0.894614	0.00112701
mmu-miR-6945-5p		circ_779	171	-31.17	19	78.95	84.21		LRRC8A	163	-33.7	23	73.91	73.91		0.785069	0.0121946
mmu-miR-6945-5p		circ_779	171	-31.17	19	78.95	84.21		LRRC8D	172	-31.39	20	80	80		0.785069	0.0121946
mmu-miR-6950-3p		circ_2313	171	-33.76	19	78.95	84.21		FRYL	167	-30.39	19	73.68	84.21		0.762821	0.016814
mmu-miR-6950-5p		circ_946	180	-36.33	21	80.95	85.71		DCBLD2	180	-33.65	22	77.27	86.36		0.858099	0.00307611
mmu-miR-6950-5p		circ_946	180	-36.33	21	80.95	85.71		NAV1	165	-30.41	20	70	80		0.858099	0.00307611
mmu-miR-6950-5p		circ_946	180	-36.33	21	80.95	85.71		ZCCHC4	176	-32.86	21	80.95	80.95		0.894614	0.00112701
mmu-miR-6950-5p		circ_946	180	-36.33	21	80.95	85.71		RAB31	177	-33.06	23	73.91	82.61		0.858099	0.00307611
mmu-miR-6950-5p		circ_946	180	-36.33	21	80.95	85.71		ADORA2B	169	-30.71	23	73.91	73.91		0.858099	0.00307611
mmu-miR-6950-5p		circ_946	180	-36.33	21	80.95	85.71		PRG4	180	-36.46	21	80.95	85.71		0.712039	0.0314
mmu-miR-6950-5p		circ_946	180	-36.33	21	80.95	85.71		ARNTL	175	-32.07	20	80	85		0.858099	0.00307611
mmu-miR-6950-5p		circ_946	180	-36.33	21	80.95	85.71		TUT1	177	-35.29	21	80.95	80.95		0.803326	0.00911066
mmu-miR-6950-5p		circ_946	180	-36.33	21	80.95	85.71		VASP	176	-33.87	20	80	85		0.894614	0.00112701
mmu-miR-6950-5p		circ_946	180	-36.33	21	80.95	85.71		TSPAN5	171	-31.82	19	78.95	84.21		0.803326	0.00911066
mmu-miR-6952-3p		circ_779	174	-30.31	18	83.33	88.89		POLR1A	166	-30.26	18	77.78	83.33		0.748554	0.0203173
mmu-miR-6954-5p		circ_167	178	-34.24	19	84.21	89.47		GDA	171	-31.72	20	75	85		0.858099	0.00307611
mmu-miR-6954-5p		circ_167	178	-34.24	19	84.21	89.47		NAV1	163	-30.23	20	75	75		0.803326	0.00911066
mmu-miR-6954-5p		circ_167	178	-34.24	19	84.21	89.47		ZFP608	161	-30.03	19	73.68	78.95		0.803326	0.00911066
mmu-miR-6954-5p		circ_167	178	-34.24	19	84.21	89.47		PTGS1	176	-32.02	20	80	85		0.839841	0.00461137
mmu-miR-6954-5p		circ_167	178	-34.24	19	84.21	89.47		INPP4B	167	-32.17	20	75	80		0.858099	0.00307611
mmu-miR-6954-5p		circ_167	178	-34.24	19	84.21	89.47		ACE	168	-36	22	72.73	77.27		0.858099	0.00307611
mmu-miR-6954-5p		circ_167	178	-34.24	19	84.21	89.47		LIMK1	162	-30.59	19	73.68	78.95		0.748554	0.0203173
mmu-miR-6954-5p		circ_167	178	-34.24	19	84.21	89.47		CD14	172	-32.84	21	76.19	80.95		0.858099	0.00307611
mmu-miR-6954-5p		circ_167	178	-34.24	19	84.21	89.47		KAT2A	162	-31.55	20	75	75		0.803326	0.00911066
mmu-miR-6954-5p		circ_167	178	-34.24	19	84.21	89.47		SMURF1	168	-34.26	24	70.83	75		0.785069	0.0121946
mmu-miR-6954-5p		circ_167	178	-34.24	19	84.21	89.47		NEK6	171	-32.49	20	80	80		0.858099	0.00307611
mmu-miR-6955-5p		circ_915	173	-35.79	21	71.43	85.71		HK2	168	-30.85	20	70	85		0.783349	0.0125168
mmu-miR-6955-5p		circ_915	173	-35.79	21	71.43	85.71		NAV2	166	-33.3	24	70.83	70.83		0.800757	0.00950848
mmu-miR-6955-5p		circ_915	173	-35.79	21	71.43	85.71		WDR4	177	-34.26	21	80.95	80.95		0.783349	0.0125168
mmu-miR-6955-5p		circ_915	173	-35.79	21	71.43	85.71		TGFBR1	181	-31.72	24	79.17	79.17		0.835573	0.00503382
mmu-miR-6955-5p		circ_915	173	-35.79	21	71.43	85.71		DOCK5	177	-35.51	22	77.27	81.82		0.800757	0.00950848
mmu-miR-6955-5p		circ_915	173	-35.79	21	71.43	85.71		KNOP1	182	-36.06	23	73.91	86.96		0.800757	0.00950848
mmu-miR-6955-5p		circ_915	173	-35.79	21	71.43	85.71		E2F8	165	-30.01	22	72.73	72.73		0.800757	0.00950848
mmu-miR-6955-5p		circ_915	173	-35.79	21	71.43	85.71		PFAS	177	-33.03	21	76.19	85.71		0.800757	0.00950848
mmu-miR-6958-5p		circ_2411	179	-35.51	19	84.21	89.47		GPRC5B	169	-31.13	20	80	80		0.779773	0.0132052
mmu-miR-6958-5p		circ_2411	179	-35.51	19	84.21	89.47		ZFP697	164	-31.05	22	72.73	72.73		0.881483	0.00167742
mmu-miR-6958-5p		circ_2411	179	-35.51	19	84.21	89.47		DPP9	167	-30.14	21	76.19	76.19		0.813676	0.00762197
mmu-miR-6958-5p		circ_2411	179	-35.51	19	84.21	89.47		FAM63A	167	-30.78	19	73.68	84.21		0.830628	0.00555542
mmu-miR-6958-5p		circ_2411	179	-35.51	19	84.21	89.47		GAS7	175	-32.52	19	84.21	84.21		0.813676	0.00762197
mmu-miR-6958-5p		circ_2411	179	-35.51	19	84.21	89.47		ALCAM	180	-32.98	19	84.21	89.47		0.932337	0.000248221
mmu-miR-6971-5p		circ_2313	166	-30.01	19	73.68	84.21		EXOSC2	166	-30.06	18	77.78	83.33		0.864531	0.00263237
mmu-miR-6971-5p		circ_2313	166	-30.01	19	73.68	84.21		AMOTL1	170	-33.79	18	83.33	83.33		0.864531	0.00263237
mmu-miR-6971-5p		circ_2313	166	-30.01	19	73.68	84.21		GPRC5B	170	-35.38	18	77.78	88.89		0.762821	0.016814
mmu-miR-6971-5p		circ_2313	166	-30.01	19	73.68	84.21		ATG7	161	-31.89	20	75	75		0.762821	0.016814
mmu-miR-6971-5p		circ_2313	166	-30.01	19	73.68	84.21		FAM169B	169	-32.71	18	77.78	88.89		0.864531	0.00263237
mmu-miR-6971-5p		circ_2313	166	-30.01	19	73.68	84.21		CAMK1D	166	-31.79	19	73.68	84.21		0.864531	0.00263237
mmu-miR-6971-5p		circ_2313	166	-30.01	19	73.68	84.21		FOXRED2	173	-33.67	18	83.33	88.89		0.847579	0.00390855
mmu-miR-6971-5p		circ_2313	166	-30.01	19	73.68	84.21		AUTS2	166	-30.54	18	72.22	88.89		0.728918	0.0258836
mmu-miR-6971-5p		circ_2313	166	-30.01	19	73.68	84.21		SQRDL	165	-32.96	18	77.78	83.33		0.813676	0.00762197
mmu-miR-6971-5p		circ_2313	166	-30.01	19	73.68	84.21		AP1S1	173	-32.86	18	83.33	88.89		0.847579	0.00390855
mmu-miR-6971-5p		circ_2313	166	-30.01	19	73.68	84.21		DUSP3	169	-30.67	19	78.95	84.21		0.847579	0.00390855
mmu-miR-6971-5p		circ_2313	166	-30.01	19	73.68	84.21		NRP2	162	-33.38	19	73.68	78.95		0.762821	0.016814
mmu-miR-6975-5p		circ_1804	176	-32.31	21	76.19	85.71		HEG1	173	-36.69	22	72.73	81.82		0.861684	0.00282288
mmu-miR-6975-5p		circ_1804	176	-32.31	21	76.19	85.71		MRVI1	168	-31.02	20	70	85		0.783349	0.0125168
mmu-miR-6975-5p		circ_1804	176	-32.31	21	76.19	85.71		SLC6A6	162	-35.18	20	70	80		0.783349	0.0125168
mmu-miR-6975-5p		circ_1804	176	-32.31	21	76.19	85.71		CDT1	160	-34.32	20	70	75		0.818165	0.00703117
mmu-miR-6975-5p		circ_1804	176	-32.31	21	76.19	85.71		FMO2	161	-30.56	20	70	75		0.809461	0.0082066
mmu-miR-6975-5p		circ_1804	176	-32.31	21	76.19	85.71		PLCE1	163	-32.55	22	72.73	72.73		0.818165	0.00703117
mmu-miR-6975-5p		circ_2201	176	-32.31	21	76.19	85.71		HEG1	173	-36.69	22	72.73	81.82		0.728918	0.0258836
mmu-miR-6975-5p		circ_2201	176	-32.31	21	76.19	85.71		KAT2A	177	-36.61	21	76.19	85.71		0.711967	0.0314253
mmu-miR-6975-5p		circ_2201	176	-32.31	21	76.19	85.71		MRVI1	168	-31.02	20	70	85		0.779773	0.0132052
mmu-miR-6975-5p		circ_2201	176	-32.31	21	76.19	85.71		SLC6A6	162	-35.18	20	70	80		0.779773	0.0132052
mmu-miR-6975-5p		circ_2201	176	-32.31	21	76.19	85.71		CDT1	160	-34.32	20	70	75		0.813676	0.00762197
mmu-miR-6975-5p		circ_2201	176	-32.31	21	76.19	85.71		FMO2	161	-30.56	20	70	75		0.711967	0.0314253
mmu-miR-6975-5p		circ_2201	176	-32.31	21	76.19	85.71		PLCE1	163	-32.55	22	72.73	72.73		0.813676	0.00762197
mmu-miR-6975-5p		circ_2201	176	-32.31	21	76.19	85.71		TRAK2	165	-30.37	21	71.43	76.19		0.796725	0.0101563
mmu-miR-6975-5p		circ_265	168	-32.36	22	72.73	77.27		HEG1	173	-36.69	22	72.73	81.82		0.716667	0.0368662
mmu-miR-6975-5p		circ_265	168	-32.36	22	72.73	77.27		CDT1	160	-34.32	20	70	75		0.716667	0.0368662
mmu-miR-6975-5p		circ_265	168	-32.36	22	72.73	77.27		PLCE1	163	-32.55	22	72.73	72.73		0.716667	0.0368662
mmu-miR-6980-5p		circ_779	164	-30.87	21	71.43	76.19		CMKLR1	165	-31.3	18	77.78	83.33		0.894614	0.00112701
mmu-miR-6980-5p		circ_779	164	-30.87	21	71.43	76.19		AIG1	161	-32.74	18	77.78	77.78		0.803326	0.00911066
mmu-miR-6980-5p		circ_779	164	-30.87	21	71.43	76.19		GSTO1	160	-31.01	18	77.78	77.78		0.858099	0.00307611
mmu-miR-6980-5p		circ_779	164	-30.87	21	71.43	76.19		HHIPL1	165	-31.27	18	77.78	83.33		0.839841	0.00461137
mmu-miR-6980-5p		circ_779	164	-30.87	21	71.43	76.19		PML	165	-34.27	20	75	80		0.803326	0.00911066
mmu-miR-6980-5p		circ_779	164	-30.87	21	71.43	76.19		GPRC5B	161	-32.24	18	72.22	83.33		0.785069	0.0121946
mmu-miR-6980-5p		circ_779	164	-30.87	21	71.43	76.19		AP1S1	171	-34.67	19	78.95	84.21		0.803326	0.00911066
mmu-miR-6980-5p		circ_779	164	-30.87	21	71.43	76.19		FRMD4A	164	-30.14	22	72.73	72.73		0.803326	0.00911066
mmu-miR-6980-5p		circ_779	164	-30.87	21	71.43	76.19		PHC2	171	-35.54	21	71.43	85.71		0.803326	0.00911066
mmu-miR-6980-5p		circ_779	164	-30.87	21	71.43	76.19		ATG7	167	-38.02	21	71.43	80.95		0.785069	0.0121946
mmu-miR-6980-5p		circ_779	164	-30.87	21	71.43	76.19		S1PR2	170	-35.73	19	78.95	84.21		0.803326	0.00911066
mmu-miR-6981-5p		circ_780	183	-32.13	25	76	80		IMP4	180	-31.05	25	72	80		0.803326	0.00911066
mmu-miR-6981-5p		circ_780	183	-32.13	25	76	80		DOCK5	163	-30.12	20	75	75		0.785069	0.0121946
mmu-miR-6981-5p		circ_780	183	-32.13	25	76	80		HSD11B1	176	-32.44	21	80.95	80.95		0.803326	0.00911066
mmu-miR-6981-5p		circ_780	183	-32.13	25	76	80		EPS8	179	-33.88	23	73.91	82.61		0.748554	0.0203173
mmu-miR-6981-5p		circ_780	183	-32.13	25	76	80		DPH6	184	-32.43	25	76	80		0.748554	0.0203173
mmu-miR-6981-5p		circ_780	183	-32.13	25	76	80		AI607873	182	-31.21	24	79.17	79.17		0.748554	0.0203173
mmu-miR-6981-5p		circ_780	183	-32.13	25	76	80		RALB	161	-33.52	20	70	75		0.839841	0.00461137
mmu-miR-6981-5p		circ_780	183	-32.13	25	76	80		IL6RA	179	-34.36	24	75	79.17		0.785069	0.0121946
mmu-miR-6981-5p		circ_780	183	-32.13	25	76	80		DHRS9	184	-35.29	23	82.61	82.61		0.748554	0.0203173
mmu-miR-6981-5p		circ_780	183	-32.13	25	76	80		HEG1	173	-32.64	25	72	76		0.785069	0.0121946
mmu-miR-6982-5p		circ_2411	174	-35.47	23	73.91	78.26		MRVI1	186	-39.39	22	77.27	90.91		0.847579	0.00390855
mmu-miR-6982-5p		circ_2411	174	-35.47	23	73.91	78.26		SLC43A2	168	-30.31	22	72.73	77.27		0.813676	0.00762197
mmu-miR-6982-5p		circ_2411	174	-35.47	23	73.91	78.26		DCBLD2	164	-33.67	21	71.43	76.19		0.813676	0.00762197
mmu-miR-6982-5p		circ_2411	174	-35.47	23	73.91	78.26		NAV2	172	-31.24	24	75	75		0.813676	0.00762197
mmu-miR-6982-5p		circ_2411	174	-35.47	23	73.91	78.26		ITGA5	166	-33.99	24	70.83	70.83		0.813676	0.00762197
mmu-miR-6982-5p		circ_2411	174	-35.47	23	73.91	78.26		ITPRIPL2	177	-35.08	24	75	79.17		0.779773	0.0132052
mmu-miR-6982-5p		circ_2411	174	-35.47	23	73.91	78.26		FGFR1	169	-31.99	22	72.73	77.27		0.813676	0.00762197
mmu-miR-6982-5p		circ_2411	174	-35.47	23	73.91	78.26		HMGA1	180	-35.7	20	80	90		0.796725	0.0101563
mmu-miR-6982-5p		circ_2411	174	-35.47	23	73.91	78.26		DOK1	174	-32.87	20	80	85		0.830628	0.00555542
mmu-miR-6982-5p		circ_2411	174	-35.47	23	73.91	78.26		ETV5	163	-31.41	21	71.43	76.19		0.813676	0.00762197
mmu-miR-6982-5p		circ_2411	174	-35.47	23	73.91	78.26		WNK4	176	-38.73	21	80.95	80.95		0.711967	0.0314253
mmu-miR-6982-5p		circ_2411	174	-35.47	23	73.91	78.26		LIMK1	191	-47.05	22	86.36	86.36		0.830628	0.00555542
mmu-miR-6982-5p		circ_2411	174	-35.47	23	73.91	78.26		CAMKK2	175	-34.49	27	70.37	74.07		0.830628	0.00555542
mmu-miR-6982-5p		circ_2411	174	-35.47	23	73.91	78.26		SPON1	177	-41.94	23	78.26	78.26		0.830628	0.00555542
mmu-miR-6990-3p		circ_1078	177	-31.04	18	88.89	88.89		ITGA3	171	-37.49	22	77.27	77.27		0.858099	0.00307611
mmu-miR-6990-3p		circ_1078	177	-31.04	18	88.89	88.89		KLHDC8A	183	-37.57	19	84.21	94.74		0.748554	0.0203173
mmu-miR-6990-3p		circ_1078	177	-31.04	18	88.89	88.89		BGN	171	-34.1	22	77.27	77.27		0.766812	0.0159118
mmu-miR-6990-3p		circ_1078	177	-31.04	18	88.89	88.89		SLC6A6	174	-32.18	19	84.21	84.21		0.858099	0.00307611
mmu-miR-6990-3p		circ_1078	177	-31.04	18	88.89	88.89		SIPA1L2	171	-30.97	21	76.19	80.95		0.858099	0.00307611
mmu-miR-6990-5p		circ_2567	163	-31.76	19	73.68	78.95		ZFP697	166	-35.38	19	78.95	78.95		0.752512	0.0193012
mmu-miR-7000-3p		circ_1097	170	-33.94	18	77.78	88.89		XPR1	167	-36.74	19	73.68	84.21		0.762821	0.016814
mmu-miR-7000-3p		circ_1097	170	-33.94	18	77.78	88.89		PLEKHM1	165	-33.04	18	77.78	83.33		0.881483	0.00167742
mmu-miR-7000-3p		circ_1097	170	-33.94	18	77.78	88.89		BBS12	164	-32.37	20	75	75		0.728918	0.0258836
mmu-miR-7004-3p		circ_2201	163	-31.56	20	70	80		FRRS1	171	-36.17	19	78.95	84.21		0.864531	0.00263237
mmu-miR-7004-3p		circ_2201	163	-31.56	20	70	80		ARNTL	175	-35.89	21	76.19	85.71		0.762821	0.016814
mmu-miR-7004-3p		circ_2201	163	-31.56	20	70	80		EZR	163	-30.15	18	72.22	83.33		0.779773	0.0132052
mmu-miR-7005-5p		circ_779	163	-31.59	19	73.68	78.95		ABHD2	171	-37.08	21	76.19	80.95		0.803326	0.00911066
mmu-miR-7005-5p		circ_779	163	-31.59	19	73.68	78.95		NAV2	164	-30.04	20	70	80		0.803326	0.00911066
mmu-miR-7005-5p		circ_779	163	-31.59	19	73.68	78.95		TIMP4	165	-33.69	19	78.95	84.21		0.858099	0.00307611
mmu-miR-7005-5p		circ_779	163	-31.59	19	73.68	78.95		SEMA4B	164	-30.98	21	71.43	76.19		0.785069	0.0121946
mmu-miR-7005-5p		circ_779	163	-31.59	19	73.68	78.95		RCL1	183	-39.24	19	89.47	89.47		0.839841	0.00461137
mmu-miR-7005-5p		circ_779	163	-31.59	19	73.68	78.95		VASP	164	-30.85	20	70	80		0.839841	0.00461137
mmu-miR-7005-5p		circ_779	163	-31.59	19	73.68	78.95		CHD9	175	-34.25	19	73.68	94.74		0.748554	0.0203173
mmu-miR-7005-5p		circ_779	163	-31.59	19	73.68	78.95		COL14A1	162	-32.13	19	73.68	78.95		0.803326	0.00911066
mmu-miR-7005-5p		circ_779	163	-31.59	19	73.68	78.95		PLCE1	172	-38.61	21	76.19	80.95		0.785069	0.0121946
mmu-miR-7005-5p		circ_779	163	-31.59	19	73.68	78.95		SESTD1	171	-36.55	23	73.91	78.26		0.785069	0.0121946
mmu-miR-7005-5p		circ_779	163	-31.59	19	73.68	78.95		LDLRAP1	171	-35.57	20	75	85		0.803326	0.00911066
mmu-miR-7005-5p		circ_779	163	-31.59	19	73.68	78.95		BCAR1	166	-36.02	20	75	80		0.730297	0.0254636
mmu-miR-7005-5p		circ_779	163	-31.59	19	73.68	78.95		INF2	165	-31.98	19	78.95	78.95		0.712039	0.0314
mmu-miR-7005-5p		circ_779	163	-31.59	19	73.68	78.95		SHC1	176	-33.48	20	80	85		0.858099	0.00307611
mmu-miR-7005-5p		circ_779	163	-31.59	19	73.68	78.95		NRP2	168	-30.19	21	76.19	76.19		0.785069	0.0121946
mmu-miR-7005-5p		circ_779	163	-31.59	19	73.68	78.95		BGN	172	-35.14	22	72.73	81.82		0.858099	0.00307611
mmu-miR-7005-5p		circ_779	163	-31.59	19	73.68	78.95		MYBBP1A	172	-31.38	22	77.27	77.27		0.803326	0.00911066
mmu-miR-7005-5p		circ_779	163	-31.59	19	73.68	78.95		CARD6	172	-30.93	22	77.27	77.27		0.803326	0.00911066
mmu-miR-7005-5p		circ_779	163	-31.59	19	73.68	78.95		ALPL	163	-32.87	22	72.73	72.73		0.803326	0.00911066
mmu-miR-7005-5p		circ_2400	163	-30.52	20	75	75		BCAR1	166	-36.02	20	75	80		0.703005	0.0346443
mmu-miR-7011-3p		circ_780	171	-32.36	20	75	85		GIMAP5	175	-30.04	20	80	85		0.79849	0.00986915
mmu-miR-7011-3p		circ_780	171	-32.36	20	75	85		GM340	178	-35.84	20	85	90		0.785069	0.0121946
mmu-miR-7011-3p		circ_780	171	-32.36	20	75	85		ELOVL6	174	-32.35	19	78.95	89.47		0.785069	0.0121946
mmu-miR-7011-5p		circ_1804	165	-30.51	24	70.83	70.83		MICALL2	172	-31.02	20	75	85		0.73983	0.0226809
mmu-miR-7011-5p		circ_1804	165	-30.51	24	70.83	70.83		TRIOBP	167	-31.1	22	72.73	77.27		0.870388	0.0022686
mmu-miR-7011-5p		circ_1804	165	-30.51	24	70.83	70.83		JADE2	165	-33.27	20	70	80		0.818165	0.00703117
mmu-miR-7011-5p		circ_1804	165	-30.51	24	70.83	70.83		TUBB4B	171	-31.27	20	75	85		0.792053	0.0109431
mmu-miR-7011-5p		circ_1804	165	-30.51	24	70.83	70.83		TRIO	185	-38.8	21	80.95	90.48		0.774646	0.0142357
mmu-miR-7011-5p		circ_1804	165	-30.51	24	70.83	70.83		DPP9	168	-30.54	24	70.83	79.17		0.783349	0.0125168
mmu-miR-7011-5p		circ_1804	165	-30.51	24	70.83	70.83		ITPRIPL2	172	-30.53	22	72.73	81.82		0.783349	0.0125168
mmu-miR-7011-5p		circ_1804	165	-30.51	24	70.83	70.83		AUTS2	181	-35.37	21	76.19	90.48		0.748534	0.0203226
mmu-miR-7011-5p		circ_1804	165	-30.51	24	70.83	70.83		RRP12	176	-31.33	23	78.26	78.26		0.800757	0.00950848
mmu-miR-7011-5p		circ_2201	165	-30.51	24	70.83	70.83		JADE2	165	-33.27	20	70	80		0.74587	0.0210263
mmu-miR-7011-5p		circ_2201	165	-30.51	24	70.83	70.83		TRIO	185	-38.8	21	80.95	90.48		0.847579	0.00390855
mmu-miR-7011-5p		circ_2201	165	-30.51	24	70.83	70.83		DPP9	168	-30.54	24	70.83	79.17		0.779773	0.0132052
mmu-miR-7011-5p		circ_2201	165	-30.51	24	70.83	70.83		ITPRIPL2	172	-30.53	22	72.73	81.82		0.779773	0.0132052
mmu-miR-7011-5p		circ_2201	165	-30.51	24	70.83	70.83		PIK3R5	168	-30.76	18	83.33	83.33		0.796725	0.0101563
mmu-miR-7011-5p		circ_2201	165	-30.51	24	70.83	70.83		RRP12	176	-31.33	23	78.26	78.26		0.762821	0.016814
mmu-miR-7011-5p		circ_779	173	-33.86	23	73.91	78.26		MICALL2	172	-31.02	20	75	85		0.803326	0.00911066
mmu-miR-7011-5p		circ_779	173	-33.86	23	73.91	78.26		TRIOBP	167	-31.1	22	72.73	77.27		0.803326	0.00911066
mmu-miR-7011-5p		circ_779	173	-33.86	23	73.91	78.26		JADE2	165	-33.27	20	70	80		0.785069	0.0121946
mmu-miR-7011-5p		circ_779	173	-33.86	23	73.91	78.26		TUBB4B	171	-31.27	20	75	85		0.912871	0.000589839
mmu-miR-7011-5p		circ_779	173	-33.86	23	73.91	78.26		TRIO	185	-38.8	21	80.95	90.48		0.785069	0.0121946
mmu-miR-7011-5p		circ_779	173	-33.86	23	73.91	78.26		DPP9	168	-30.54	24	70.83	79.17		0.803326	0.00911066
mmu-miR-7011-5p		circ_779	173	-33.86	23	73.91	78.26		ITPRIPL2	172	-30.53	22	72.73	81.82		0.730297	0.0254636
mmu-miR-7011-5p		circ_779	173	-33.86	23	73.91	78.26		PIK3R5	168	-30.76	18	83.33	83.33		0.785069	0.0121946
mmu-miR-7011-5p		circ_779	173	-33.86	23	73.91	78.26		AUTS2	181	-35.37	21	76.19	90.48		0.730297	0.0254636
mmu-miR-7011-5p		circ_779	173	-33.86	23	73.91	78.26		RRP12	176	-31.33	23	78.26	78.26		0.803326	0.00911066
mmu-miR-7016-3p		circ_1097	177	-33.6	18	88.89	88.89		RALB	177	-36.28	18	88.89	88.89		0.762821	0.016814
mmu-miR-7016-3p		circ_1097	177	-33.6	18	88.89	88.89		DKC1	177	-33.6	18	88.89	88.89		0.813676	0.00762197
mmu-miR-7016-3p		circ_1097	177	-33.6	18	88.89	88.89		SIPA1L2	172	-35.43	20	80	80		0.762821	0.016814
mmu-miR-7016-3p		circ_1097	177	-33.6	18	88.89	88.89		TMED5	177	-33.6	18	88.89	88.89		0.728918	0.0258836
mmu-miR-7016-3p		circ_1097	177	-33.6	18	88.89	88.89		NAV1	177	-33.6	18	88.89	88.89		0.779773	0.0132052
mmu-miR-7016-3p		circ_1097	177	-33.6	18	88.89	88.89		NAV2	177	-32.06	18	88.89	88.89		0.762821	0.016814
mmu-miR-7016-3p		circ_1097	177	-33.6	18	88.89	88.89		PKD2	177	-33.6	18	88.89	88.89		0.728918	0.0258836
mmu-miR-7016-3p		circ_1097	177	-33.6	18	88.89	88.89		PBDC1	177	-34.23	18	88.89	88.89		0.762821	0.016814
mmu-miR-7016-3p		circ_1097	177	-33.6	18	88.89	88.89		DPH6	177	-33.6	18	88.89	88.89		0.711967	0.0314253
mmu-miR-7016-3p		circ_1097	177	-33.6	18	88.89	88.89		CENPA	177	-32.06	18	88.89	88.89		0.796725	0.0101563
mmu-miR-7016-3p		circ_1097	177	-33.6	18	88.89	88.89		TLR4	174	-34.73	18	83.33	88.89		0.813676	0.00762197
mmu-miR-7017-3p		circ_779	167	-30.6	19	78.95	78.95		HTR1B	171	-32.8	22	77.27	77.27		0.843363	0.00428166
mmu-miR-7017-3p		circ_779	167	-30.6	19	78.95	78.95		ZFP862-PS	166	-30.1	18	77.78	83.33		0.858099	0.00307611
mmu-miR-7017-3p		circ_779	167	-30.6	19	78.95	78.95		TOP1	166	-31.21	19	78.95	78.95		0.803326	0.00911066
mmu-miR-7017-3p		circ_779	167	-30.6	19	78.95	78.95		FRMD4A	171	-36.94	19	78.95	84.21		0.803326	0.00911066
mmu-miR-7018-3p		circ_167	171	-30.76	22	77.27	77.27		AEN	171	-30.85	19	78.95	84.21		0.839841	0.00461137
mmu-miR-7018-3p		circ_167	171	-30.76	22	77.27	77.27		HSD11B1	176	-31.05	19	84.21	84.21		0.839841	0.00461137
mmu-miR-7018-3p		circ_167	171	-30.76	22	77.27	77.27		TBL3	172	-36.76	21	76.19	80.95		0.839841	0.00461137
mmu-miR-7018-5p		circ_1804	174	-37.94	23	73.91	78.26		MAGI1	174	-31.45	23	73.91	78.26		0.748534	0.0203226
mmu-miR-7018-5p		circ_1804	174	-37.94	23	73.91	78.26		SLC29A1	172	-30.6	24	75	79.17		0.809461	0.0082066
mmu-miR-7018-5p		circ_1804	174	-37.94	23	73.91	78.26		SHC1	167	-34.47	22	72.73	81.82		0.713718	0.0308198
mmu-miR-7018-5p		circ_1804	174	-37.94	23	73.91	78.26		AUTS2	170	-35.61	22	72.73	77.27		0.748534	0.0203226
mmu-miR-7018-5p		circ_1804	174	-37.94	23	73.91	78.26		SHQ1	163	-32.07	20	75	75		0.835573	0.00503382
mmu-miR-7018-5p		circ_1804	174	-37.94	23	73.91	78.26		JADE2	175	-33.65	22	77.27	81.82		0.818165	0.00703117
mmu-miR-7018-5p		circ_167	169	-30.93	24	70.83	75		MAGI1	174	-31.45	23	73.91	78.26		0.748554	0.0203173
mmu-miR-7018-5p		circ_167	169	-30.93	24	70.83	75		SLC29A1	172	-30.6	24	75	79.17		0.894614	0.00112701
mmu-miR-7018-5p		circ_167	169	-30.93	24	70.83	75		SHC1	167	-34.47	22	72.73	81.82		0.858099	0.00307611
mmu-miR-7018-5p		circ_167	169	-30.93	24	70.83	75		AUTS2	170	-35.61	22	72.73	77.27		0.730297	0.0254636
mmu-miR-7018-5p		circ_167	169	-30.93	24	70.83	75		SHQ1	163	-32.07	20	75	75		0.839841	0.00461137
mmu-miR-7018-5p		circ_167	169	-30.93	24	70.83	75		JADE2	175	-33.65	22	77.27	81.82		0.785069	0.0121946
mmu-miR-7018-5p		circ_2201	174	-37.94	23	73.91	78.26		MAGI1	174	-31.45	23	73.91	78.26		0.813676	0.00762197
mmu-miR-7018-5p		circ_2201	174	-37.94	23	73.91	78.26		SHQ1	163	-32.07	20	75	75		0.711967	0.0314253
mmu-miR-7018-5p		circ_2201	174	-37.94	23	73.91	78.26		JADE2	175	-33.65	22	77.27	81.82		0.74587	0.0210263
mmu-miR-702-3p		circ_2201	170	-31.29	19	78.95	84.21		RPS6KA4	168	-31.1	20	70	85		0.796725	0.0101563
mmu-miR-702-3p		circ_2201	170	-31.29	19	78.95	84.21		ZFP217	170	-39.66	19	73.68	89.47		0.74587	0.0210263
mmu-miR-702-3p		circ_2201	170	-31.29	19	78.95	84.21		HTR1B	171	-34.99	20	75	85		0.76602	0.0160882
mmu-miR-702-3p		circ_2201	170	-31.29	19	78.95	84.21		ATP6V0A1	167	-31.36	19	73.68	84.21		0.813676	0.00762197
mmu-miR-702-3p		circ_2201	170	-31.29	19	78.95	84.21		ZCCHC4	172	-30.54	21	76.19	80.95		0.813676	0.00762197
mmu-miR-702-3p		circ_1804	170	-31.29	19	78.95	84.21		ZFP217	170	-39.66	19	73.68	89.47		0.818165	0.00703117
mmu-miR-702-3p		circ_1804	170	-31.29	19	78.95	84.21		HTR1B	171	-34.99	20	75	85		0.734192	0.024301
mmu-miR-702-3p		circ_1804	170	-31.29	19	78.95	84.21		DIO3	175	-33.95	20	80	85		0.8965	0.00105998
mmu-miR-702-3p		circ_1804	170	-31.29	19	78.95	84.21		LDLRAP1	164	-33.56	19	73.68	78.95		0.783349	0.0125168
mmu-miR-702-3p		circ_1804	170	-31.29	19	78.95	84.21		ATP6V0A1	167	-31.36	19	73.68	84.21		0.73983	0.0226809
mmu-miR-702-3p		circ_1804	170	-31.29	19	78.95	84.21		ZCCHC4	172	-30.54	21	76.19	80.95		0.748534	0.0203226
mmu-miR-702-3p		circ_1078	172	-35.09	20	75	85		RPS6KA4	168	-31.1	20	70	85		0.821584	0.00660266
mmu-miR-702-3p		circ_1078	172	-35.09	20	75	85		ZFP217	170	-39.66	19	73.68	89.47		0.839841	0.00461137
mmu-miR-702-3p		circ_1078	172	-35.09	20	75	85		HTR1B	171	-34.99	20	75	85		0.825029	0.00618921
mmu-miR-702-3p		circ_1078	172	-35.09	20	75	85		DIO3	175	-33.95	20	80	85		0.748554	0.0203173
mmu-miR-702-3p		circ_1078	172	-35.09	20	75	85		LDLRAP1	164	-33.56	19	73.68	78.95		0.858099	0.00307611
mmu-miR-702-3p		circ_1078	172	-35.09	20	75	85		ATP6V0A1	167	-31.36	19	73.68	84.21		0.858099	0.00307611
mmu-miR-702-3p		circ_1078	172	-35.09	20	75	85		ZCCHC4	172	-30.54	21	76.19	80.95		0.748554	0.0203173
mmu-miR-7020-5p		circ_2313	176	-31.17	20	80	85		NRP2	174	-34.36	27	70.37	74.07		0.762821	0.016814
mmu-miR-7020-5p		circ_2313	176	-31.17	20	80	85		AUTS2	172	-33.16	21	76.19	80.95		0.728918	0.0258836
mmu-miR-7020-5p		circ_2313	176	-31.17	20	80	85		ARNTL	176	-30.15	21	76.19	85.71		0.881483	0.00167742
mmu-miR-7020-5p		circ_2313	176	-31.17	20	80	85		ATP6V0A1	164	-30.5	22	72.73	72.73		0.830628	0.00555542
mmu-miR-7020-5p		circ_2313	176	-31.17	20	80	85		S1PR2	182	-35.64	22	77.27	86.36		0.881483	0.00167742
mmu-miR-7020-5p		circ_2313	176	-31.17	20	80	85		ETV4	179	-35.87	20	85	85		0.813676	0.00762197
mmu-miR-7020-5p		circ_2313	176	-31.17	20	80	85		FNIP2	171	-31.7	19	78.95	84.21		0.830628	0.00555542
mmu-miR-7023-5p		circ_167	168	-32.17	23	73.91	73.91		DIAPH1	171	-31.93	18	77.78	88.89		0.858099	0.00307611
mmu-miR-7023-5p		circ_167	168	-32.17	23	73.91	73.91		2019-09-09	163	-36.3	20	70	80		0.748554	0.0203173
mmu-miR-7023-5p		circ_167	168	-32.17	23	73.91	73.91		TOP1	163	-32.04	19	73.68	78.95		0.803326	0.00911066
mmu-miR-7023-5p		circ_167	168	-32.17	23	73.91	73.91		ZFP608	162	-33.16	21	71.43	80.95		0.803326	0.00911066
mmu-miR-7023-5p		circ_167	168	-32.17	23	73.91	73.91		LRRC8D	163	-30.74	19	73.68	78.95		0.785069	0.0121946
mmu-miR-7023-5p		circ_167	168	-32.17	23	73.91	73.91		MBNL3	176	-30.79	20	75	90		0.839841	0.00461137
mmu-miR-7023-5p		circ_167	168	-32.17	23	73.91	73.91		HSD11B1	162	-34.08	20	75	80		0.839841	0.00461137
mmu-miR-7023-5p		circ_167	168	-32.17	23	73.91	73.91		E2F8	172	-31.02	20	70	90		0.803326	0.00911066
mmu-miR-7028-5p		circ_167	172	-31.49	20	75	85		ZPR1	164	-32.6	20	70	80		0.858099	0.00307611
mmu-miR-7028-5p		circ_167	172	-31.49	20	75	85		NAV2	171	-30.33	20	80	80		0.803326	0.00911066
mmu-miR-7028-5p		circ_167	172	-31.49	20	75	85		CIAPIN1	173	-31.63	23	73.91	78.26		0.858099	0.00307611
mmu-miR-7028-5p		circ_167	172	-31.49	20	75	85		EFHD2	176	-33.19	20	75	90		0.839841	0.00461137
mmu-miR-7028-5p		circ_167	172	-31.49	20	75	85		JADE2	175	-32.58	20	80	85		0.785069	0.0121946
mmu-miR-7028-5p		circ_167	172	-31.49	20	75	85		URB1	168	-31.61	20	75	80		0.803326	0.00911066
mmu-miR-7028-5p		circ_2201	173	-31.39	23	73.91	78.26		NAV2	171	-30.33	20	80	80		0.779773	0.0132052
mmu-miR-7028-5p		circ_2201	173	-31.39	23	73.91	78.26		JADE2	175	-32.58	20	80	85		0.74587	0.0210263
mmu-miR-7028-5p		circ_2201	173	-31.39	23	73.91	78.26		URB1	168	-31.61	20	75	80		0.779773	0.0132052
mmu-miR-7028-5p		circ_1804	173	-31.39	23	73.91	78.26		ZPR1	164	-32.6	20	70	80		0.800757	0.00950848
mmu-miR-7028-5p		circ_1804	173	-31.39	23	73.91	78.26		NAV2	171	-30.33	20	80	80		0.783349	0.0125168
mmu-miR-7028-5p		circ_1804	173	-31.39	23	73.91	78.26		CIAPIN1	173	-31.63	23	73.91	78.26		0.800757	0.00950848
mmu-miR-7028-5p		circ_1804	173	-31.39	23	73.91	78.26		EFHD2	176	-33.19	20	75	90		0.731126	0.025213
mmu-miR-7028-5p		circ_1804	173	-31.39	23	73.91	78.26		JADE2	175	-32.58	20	80	85		0.818165	0.00703117
mmu-miR-7028-5p		circ_1804	173	-31.39	23	73.91	78.26		URB1	168	-31.61	20	75	80		0.783349	0.0125168
mmu-miR-7030-5p		circ_780	180	-38.12	19	78.95	94.74		EPAS1	180	-34.5	22	81.82	81.82		0.785069	0.0121946
mmu-miR-7030-5p		circ_780	180	-38.12	19	78.95	94.74		CCND1	171	-30.62	19	78.95	84.21		0.785069	0.0121946
mmu-miR-7030-5p		circ_780	180	-38.12	19	78.95	94.74		HIPK2	171	-32.45	21	76.19	80.95		0.712039	0.0314
mmu-miR-7030-5p		circ_780	180	-38.12	19	78.95	94.74		AMOTL1	169	-31.36	20	80	80		0.748554	0.0203173
mmu-miR-7030-5p		circ_780	180	-38.12	19	78.95	94.74		NMT2	167	-31.14	20	70	85		0.730297	0.0254636
mmu-miR-7030-5p		circ_780	180	-38.12	19	78.95	94.74		HEG1	171	-34.51	20	75	85		0.785069	0.0121946
mmu-miR-7030-5p		circ_780	180	-38.12	19	78.95	94.74		GCNT2	166	-30.81	21	76.19	76.19		0.839841	0.00461137
mmu-miR-7031-5p		circ_780	169	-32.26	24	70.83	75		PTGS1	162	-31.33	21	71.43	76.19		0.803326	0.00911066
mmu-miR-7031-5p		circ_780	169	-32.26	24	70.83	75		WDR46	167	-32.44	20	75	80		0.748554	0.0203173
mmu-miR-7031-5p		circ_780	169	-32.26	24	70.83	75		INF2	181	-35.78	20	85	85		0.712039	0.0314
mmu-miR-7031-5p		circ_780	169	-32.26	24	70.83	75		CDCA7	177	-38.86	21	76.19	85.71		0.803326	0.00911066
mmu-miR-7031-5p		circ_780	169	-32.26	24	70.83	75		PHC2	180	-34.35	21	80.95	85.71		0.785069	0.0121946
mmu-miR-7031-5p		circ_780	169	-32.26	24	70.83	75		XPR1	165	-30.35	19	78.95	78.95		0.785069	0.0121946
mmu-miR-7031-5p		circ_780	169	-32.26	24	70.83	75		FRMD4A	168	-35.91	21	76.19	76.19		0.730297	0.0254636
mmu-miR-7031-5p		circ_946	169	-32.26	24	70.83	75		PTGS1	162	-31.33	21	71.43	76.19		0.894614	0.00112701
mmu-miR-7031-5p		circ_946	169	-32.26	24	70.83	75		WDR46	167	-32.44	20	75	80		0.839841	0.00461137
mmu-miR-7031-5p		circ_946	169	-32.26	24	70.83	75		ABCC5	168	-35.43	21	76.19	76.19		0.858099	0.00307611
mmu-miR-7031-5p		circ_946	169	-32.26	24	70.83	75		INF2	181	-35.78	20	85	85		0.821584	0.00660266
mmu-miR-7031-5p		circ_946	169	-32.26	24	70.83	75		CDCA7	177	-38.86	21	76.19	85.71		0.894614	0.00112701
mmu-miR-7031-5p		circ_946	169	-32.26	24	70.83	75		PHC2	180	-34.35	21	80.95	85.71		0.858099	0.00307611
mmu-miR-7031-5p		circ_946	169	-32.26	24	70.83	75		SOX13	166	-39.64	21	71.43	80.95		0.785069	0.0121946
mmu-miR-7031-5p		circ_946	169	-32.26	24	70.83	75		XPR1	165	-30.35	19	78.95	78.95		0.858099	0.00307611
mmu-miR-7031-5p		circ_946	169	-32.26	24	70.83	75		FRMD4A	168	-35.91	21	76.19	76.19		0.858099	0.00307611
mmu-miR-7033-3p		circ_265	174	-31.59	20	80	85		S1PR2	167	-30.54	19	73.68	84.21		0.816667	0.0107694
mmu-miR-7033-3p		circ_265	174	-31.59	20	80	85		FAM169B	170	-32.67	18	72.22	94.44		0.783333	0.0172233
mmu-miR-7033-5p		circ_167	163	-31.54	19	73.68	78.95		HEG1	174	-32.12	19	78.95	89.47		0.858099	0.00307611
mmu-miR-7033-5p		circ_167	163	-31.54	19	73.68	78.95		PIK3R5	167	-30.69	19	73.68	84.21		0.785069	0.0121946
mmu-miR-7033-5p		circ_167	163	-31.54	19	73.68	78.95		MRPL12	176	-35.48	22	77.27	86.36		0.858099	0.00307611
mmu-miR-7033-5p		circ_167	163	-31.54	19	73.68	78.95		HIPK2	171	-33.4	21	76.19	80.95		0.712039	0.0314
mmu-miR-7033-5p		circ_167	163	-31.54	19	73.68	78.95		LPIN3	167	-30.41	21	76.19	76.19		0.730297	0.0254636
mmu-miR-7033-5p		circ_167	163	-31.54	19	73.68	78.95		GM340	168	-34.73	23	73.91	73.91		0.803326	0.00911066
mmu-miR-7033-5p		circ_167	163	-31.54	19	73.68	78.95		NSUN2	169	-33.22	23	73.91	73.91		0.912871	0.000589839
mmu-miR-7033-5p		circ_167	163	-31.54	19	73.68	78.95		MTMR10	176	-33.79	22	77.27	81.82		0.803326	0.00911066
mmu-miR-7033-5p		circ_167	163	-31.54	19	73.68	78.95		S1PR2	167	-30.14	21	76.19	76.19		0.803326	0.00911066
mmu-miR-7033-5p		circ_167	163	-31.54	19	73.68	78.95		2019-09-09	175	-36.1	23	78.26	78.26		0.748554	0.0203173
mmu-miR-7033-5p		circ_167	163	-31.54	19	73.68	78.95		FGF10	173	-34.44	21	76.19	80.95		0.803326	0.00911066
mmu-miR-7033-5p		circ_167	163	-31.54	19	73.68	78.95		LURAP1L	172	-30.3	23	73.91	78.26		0.894614	0.00112701
mmu-miR-7033-5p		circ_167	163	-31.54	19	73.68	78.95		SLC6A6	168	-31.9	22	72.73	77.27		0.803326	0.00911066
mmu-miR-7033-5p		circ_167	163	-31.54	19	73.68	78.95		INF2	171	-30.02	21	76.19	80.95		0.712039	0.0314
mmu-miR-7033-5p		circ_167	163	-31.54	19	73.68	78.95		GRIA1	172	-32.07	21	71.43	85.71		0.839841	0.00461137
mmu-miR-7033-5p		circ_167	163	-31.54	19	73.68	78.95		WDR4	164	-34.97	24	70.83	75		0.748554	0.0203173
mmu-miR-7033-5p		circ_167	163	-31.54	19	73.68	78.95		HHIPL1	168	-31.81	19	73.68	84.21		0.839841	0.00461137
mmu-miR-7034-5p		circ_265	161	-30.67	18	72.22	83.33		NRP2	167	-30.38	19	73.68	84.21		0.816667	0.0107694
mmu-miR-7035-3p		circ_1426	169	-30.5	18	83.33	83.33		KLHL6	163	-31.69	20	75	75		0.730297	0.0254636
mmu-miR-7035-3p		circ_1426	169	-30.5	18	83.33	83.33		AEN	166	-30.06	20	75	80		0.858099	0.00307611
mmu-miR-7035-3p		circ_1426	169	-30.5	18	83.33	83.33		DHCR7	164	-31.06	18	77.78	88.89		0.803326	0.00911066
mmu-miR-7035-3p		circ_1426	169	-30.5	18	83.33	83.33		ADCY8	172	-33.23	18	88.89	88.89		0.894614	0.00112701
mmu-miR-7039-5p		circ_167	172	-30.4	20	80	80		GOT1	175	-31.46	19	78.95	89.47		0.839841	0.00461137
mmu-miR-7045-3p		circ_779	170	-32.39	19	78.95	84.21		MBNL3	167	-33.2	20	75	80		0.839841	0.00461137
mmu-miR-7045-3p		circ_779	170	-32.39	19	78.95	84.21		ALPL	170	-36	21	76.19	80.95		0.803326	0.00911066
mmu-miR-7045-3p		circ_779	170	-32.39	19	78.95	84.21		AUTS2	170	-31.47	18	83.33	83.33		0.730297	0.0254636
mmu-miR-7045-3p		circ_779	170	-32.39	19	78.95	84.21		TRIO	163	-30.83	20	75	75		0.785069	0.0121946
mmu-miR-7045-3p		circ_779	170	-32.39	19	78.95	84.21		LDLRAP1	168	-33.2	18	83.33	83.33		0.803326	0.00911066
mmu-miR-7045-3p		circ_779	170	-32.39	19	78.95	84.21		CARD6	166	-33	20	75	80		0.803326	0.00911066
mmu-miR-7045-3p		circ_779	170	-32.39	19	78.95	84.21		PIM1	175	-41.56	18	83.33	88.89		0.730297	0.0254636
mmu-miR-7045-3p		circ_779	170	-32.39	19	78.95	84.21		MMD	167	-35.16	19	78.95	78.95		0.894614	0.00112701
mmu-miR-7047-5p		circ_2201	176	-36.16	21	71.43	90.48		NAV2	172	-32.58	20	75	85		0.779773	0.0132052
mmu-miR-7047-5p		circ_2201	176	-36.16	21	71.43	90.48		FGF10	173	-37.32	24	70.83	79.17		0.711967	0.0314253
mmu-miR-7047-5p		circ_2201	176	-36.16	21	71.43	90.48		EPHA2	166	-32.33	21	76.19	80.95		0.779773	0.0132052
mmu-miR-7047-5p		circ_2201	176	-36.16	21	71.43	90.48		LRRC8D	181	-40.73	22	72.73	90.91		0.813676	0.00762197
mmu-miR-7047-5p		circ_2201	176	-36.16	21	71.43	90.48		S1PR2	167	-31.83	19	78.95	78.95		0.762821	0.016814
mmu-miR-7047-5p		circ_2201	176	-36.16	21	71.43	90.48		ZFP697	177	-35.48	18	88.89	88.89		0.813676	0.00762197
mmu-miR-7047-5p		circ_2201	176	-36.16	21	71.43	90.48		HEG1	184	-42.58	20	85	90		0.728918	0.0258836
mmu-miR-7047-5p		circ_2201	176	-36.16	21	71.43	90.48		HLF	168	-33.94	20	75	80		0.779773	0.0132052
mmu-miR-7047-5p		circ_2201	176	-36.16	21	71.43	90.48		HEATR1	164	-35.95	24	70.83	75		0.74587	0.0210263
mmu-miR-7047-5p		circ_2201	176	-36.16	21	71.43	90.48		SPRY4	170	-31.84	19	78.95	84.21		0.779773	0.0132052
mmu-miR-7047-5p		circ_2201	176	-36.16	21	71.43	90.48		XPR1	170	-33.31	18	77.78	88.89		0.779773	0.0132052
mmu-miR-7047-5p		circ_2201	176	-36.16	21	71.43	90.48		CHD9	166	-30.23	18	77.78	83.33		0.728918	0.0258836
mmu-miR-7047-5p		circ_1804	176	-36.16	21	71.43	90.48		NAV2	172	-32.58	20	75	85		0.783349	0.0125168
mmu-miR-7047-5p		circ_1804	176	-36.16	21	71.43	90.48		FGF10	173	-37.32	24	70.83	79.17		0.783349	0.0125168
mmu-miR-7047-5p		circ_1804	176	-36.16	21	71.43	90.48		EPHA2	166	-32.33	21	76.19	80.95		0.713718	0.0308198
mmu-miR-7047-5p		circ_1804	176	-36.16	21	71.43	90.48		LRRC8D	181	-40.73	22	72.73	90.91		0.818165	0.00703117
mmu-miR-7047-5p		circ_1804	176	-36.16	21	71.43	90.48		S1PR2	167	-31.83	19	78.95	78.95		0.800757	0.00950848
mmu-miR-7047-5p		circ_1804	176	-36.16	21	71.43	90.48		EHD4	172	-38.32	20	80	80		0.844277	0.0041988
mmu-miR-7047-5p		circ_1804	176	-36.16	21	71.43	90.48		ZFP697	177	-35.48	18	88.89	88.89		0.748534	0.0203226
mmu-miR-7047-5p		circ_1804	176	-36.16	21	71.43	90.48		HEG1	184	-42.58	20	85	90		0.861684	0.00282288
mmu-miR-7047-5p		circ_1804	176	-36.16	21	71.43	90.48		HLF	168	-33.94	20	75	80		0.783349	0.0125168
mmu-miR-7047-5p		circ_1804	176	-36.16	21	71.43	90.48		AUTS2	176	-36.26	23	78.26	82.61		0.748534	0.0203226
mmu-miR-7047-5p		circ_1804	176	-36.16	21	71.43	90.48		HMGA1	164	-30.09	21	71.43	76.19		0.861684	0.00282288
mmu-miR-7047-5p		circ_1804	176	-36.16	21	71.43	90.48		HEATR1	164	-35.95	24	70.83	75		0.748534	0.0203226
mmu-miR-7047-5p		circ_1804	176	-36.16	21	71.43	90.48		SPRY4	170	-31.84	19	78.95	84.21		0.783349	0.0125168
mmu-miR-7047-5p		circ_1804	176	-36.16	21	71.43	90.48		XPR1	170	-33.31	18	77.78	88.89		0.783349	0.0125168
mmu-miR-7048-5p		circ_946	179	-35.55	20	85	85		NAV1	168	-35.8	22	72.73	77.27		0.858099	0.00307611
mmu-miR-7048-5p		circ_946	179	-35.55	20	85	85		PHC2	161	-32.01	18	77.78	77.78		0.858099	0.00307611
mmu-miR-7048-5p		circ_946	179	-35.55	20	85	85		HMGA1	161	-31.47	18	77.78	77.78		0.803326	0.00911066
mmu-miR-7048-5p		circ_946	179	-35.55	20	85	85		KCNK2	173	-35.94	18	83.33	88.89		0.803326	0.00911066
mmu-miR-7048-5p		circ_946	179	-35.55	20	85	85		METTL25	160	-30.04	18	77.78	77.78		0.839841	0.00461137
mmu-miR-7049-5p		circ_1983	177	-31.37	23	73.91	82.61		NEK6	173	-31.74	21	76.19	80.95		0.783333	0.0172233
mmu-miR-7049-5p		circ_1983	177	-31.37	23	73.91	82.61		PTGES	175	-30.3	20	80	85		0.75	0.0254905
mmu-miR-7049-5p		circ_1983	177	-31.37	23	73.91	82.61		IL18RAP	171	-32.98	23	73.91	82.61		0.716667	0.0368662
mmu-miR-705		circ_2313	162	-31.07	20	70	80		MOB3A	161	-32.04	20	70	85		0.932337	0.000248221
mmu-miR-705		circ_2313	162	-31.07	20	70	80		FAM129B	166	-33.54	18	77.78	83.33		0.864531	0.00263237
mmu-miR-705		circ_2313	162	-31.07	20	70	80		GPRC5B	166	-31.46	19	73.68	84.21		0.762821	0.016814
mmu-miR-705		circ_2313	162	-31.07	20	70	80		AUTS2	170	-34.14	19	78.95	84.21		0.728918	0.0258836
mmu-miR-705		circ_2313	162	-31.07	20	70	80		CIAPIN1	170	-34.75	18	83.33	83.33		0.762821	0.016814
mmu-miR-705		circ_2313	162	-31.07	20	70	80		WIPF1	161	-33.84	18	77.78	77.78		0.830628	0.00555542
mmu-miR-705		circ_2313	162	-31.07	20	70	80		GNPDA1	178	-38	19	84.21	89.47		0.830628	0.00555542
mmu-miR-705		circ_2313	162	-31.07	20	70	80		ATIC	178	-38.84	18	83.33	94.44		0.813676	0.00762197
mmu-miR-705		circ_2313	162	-31.07	20	70	80		LAMB1	174	-37.16	19	78.95	89.47		0.762821	0.016814
mmu-miR-705		circ_2313	162	-31.07	20	70	80		RRP9	166	-35.41	18	77.78	83.33		0.949289	9.20002e-05
mmu-miR-705		circ_2313	162	-31.07	20	70	80		BCL2L1	178	-38	19	84.21	89.47		0.762821	0.016814
mmu-miR-705		circ_2313	162	-31.07	20	70	80		MGP	174	-34.66	19	78.95	89.47		0.796725	0.0101563
mmu-miR-705		circ_2313	162	-31.07	20	70	80		NAV2	169	-36.89	18	77.78	88.89		0.830628	0.00555542
mmu-miR-705		circ_1983	170	-32.41	18	77.78	88.89		MOB3A	161	-32.04	20	70	85		0.733333	0.0311232
mmu-miR-705		circ_1983	170	-32.41	18	77.78	88.89		FAM129B	166	-33.54	18	77.78	83.33		0.716667	0.0368662
mmu-miR-705		circ_1983	170	-32.41	18	77.78	88.89		GPRC5B	166	-31.46	19	73.68	84.21		0.816667	0.0107694
mmu-miR-705		circ_1983	170	-32.41	18	77.78	88.89		CIAPIN1	170	-34.75	18	83.33	83.33		0.816667	0.0107694
mmu-miR-705		circ_1983	170	-32.41	18	77.78	88.89		WIPF1	161	-33.84	18	77.78	77.78		0.766667	0.02139
mmu-miR-705		circ_1983	170	-32.41	18	77.78	88.89		GNPDA1	178	-38	19	84.21	89.47		0.783333	0.0172233
mmu-miR-705		circ_1983	170	-32.41	18	77.78	88.89		ATIC	178	-38.84	18	83.33	94.44		0.8	0.0138283
mmu-miR-705		circ_1983	170	-32.41	18	77.78	88.89		RRP9	166	-35.41	18	77.78	83.33		0.716667	0.0368662
mmu-miR-705		circ_1983	170	-32.41	18	77.78	88.89		BCL2L1	178	-38	19	84.21	89.47		0.75	0.0254905
mmu-miR-705		circ_1983	170	-32.41	18	77.78	88.89		MGP	174	-34.66	19	78.95	89.47		0.816667	0.0107694
mmu-miR-705		circ_1983	170	-32.41	18	77.78	88.89		NAV2	169	-36.89	18	77.78	88.89		0.766667	0.02139
mmu-miR-7051-3p		circ_779	175	-30.94	19	84.21	84.21		PAPPA2	167	-31.45	19	73.68	84.21		0.839841	0.00461137
mmu-miR-7051-3p		circ_779	175	-30.94	19	84.21	84.21		XPR1	184	-32.71	22	81.82	86.36		0.803326	0.00911066
mmu-miR-7051-3p		circ_779	175	-30.94	19	84.21	84.21		APRT	168	-31.22	24	70.83	75		0.894614	0.00112701
mmu-miR-7052-3p		circ_3324	171	-30.1	20	80	80		NAV2	170	-33.81	20	80	80		0.703005	0.0346443
mmu-miR-7055-5p		circ_2411	178	-30.64	18	83.33	94.44		PREB	171	-33.36	19	73.68	89.47		0.813676	0.00762197
mmu-miR-706		circ_946	200	-37.3	19	100	100		CHD9	200	-36.3	19	100	100		0.858099	0.00307611
mmu-miR-706		circ_946	200	-37.3	19	100	100		TRIOBP	200	-36.3	19	100	100		0.748554	0.0203173
mmu-miR-706		circ_946	200	-37.3	19	100	100		KNOP1	196	-33.59	20	95	95		0.858099	0.00307611
mmu-miR-706		circ_946	200	-37.3	19	100	100		STOM	200	-36.3	19	100	100		0.858099	0.00307611
mmu-miR-706		circ_946	200	-37.3	19	100	100		TMED5	196	-32.83	20	95	95		0.858099	0.00307611
mmu-miR-706		circ_946	200	-37.3	19	100	100		DUSP3	200	-37.33	19	100	100		0.839841	0.00461137
mmu-miR-706		circ_946	200	-37.3	19	100	100		NAV1	192	-30.96	19	94.74	94.74		0.858099	0.00307611
mmu-miR-706		circ_946	200	-37.3	19	100	100		SYT12	188	-31.73	20	90	90		0.748554	0.0203173
mmu-miR-706		circ_946	200	-37.3	19	100	100		CTNNAL1	200	-37.3	19	100	100		0.894614	0.00112701
mmu-miR-706		circ_946	200	-37.3	19	100	100		WDR12	196	-36.55	19	94.74	100		0.785069	0.0121946
mmu-miR-706		circ_946	200	-37.3	19	100	100		PML	196	-32.13	20	95	95		0.858099	0.00307611
mmu-miR-706		circ_946	200	-37.3	19	100	100		TOP1	196	-33.62	20	95	95		0.858099	0.00307611
mmu-miR-706		circ_946	200	-37.3	19	100	100		ATIC	188	-30.23	20	90	90		0.894614	0.00112701
mmu-miR-706		circ_946	200	-37.3	19	100	100		ZCCHC4	196	-32.13	20	95	95		0.894614	0.00112701
mmu-miR-706		circ_946	200	-37.3	19	100	100		CCL9	196	-33.62	20	95	95		0.839841	0.00461137
mmu-miR-706		circ_946	200	-37.3	19	100	100		DOHH	188	-30.23	20	90	90		0.839841	0.00461137
mmu-miR-706		circ_946	200	-37.3	19	100	100		CIAPIN1	196	-33.62	20	95	95		0.803326	0.00911066
mmu-miR-706		circ_946	200	-37.3	19	100	100		BRCC3	192	-31.24	21	90.48	90.48		0.912871	0.000589839
mmu-miR-706		circ_946	200	-37.3	19	100	100		FNIP2	196	-34.39	20	95	95		0.858099	0.00307611
mmu-miR-706		circ_2400	191	-30.86	19	94.74	94.74		DUSP3	200	-37.33	19	100	100		0.703005	0.0346443
mmu-miR-706		circ_93	196	-33.59	20	95	95		CHD9	200	-36.3	19	100	100		0.748554	0.0203173
mmu-miR-706		circ_93	196	-33.59	20	95	95		TRIOBP	200	-36.3	19	100	100		0.803326	0.00911066
mmu-miR-706		circ_93	196	-33.59	20	95	95		KNOP1	196	-33.59	20	95	95		0.803326	0.00911066
mmu-miR-706		circ_93	196	-33.59	20	95	95		STOM	200	-36.3	19	100	100		0.912871	0.000589839
mmu-miR-706		circ_93	196	-33.59	20	95	95		TMED5	196	-32.83	20	95	95		0.912871	0.000589839
mmu-miR-706		circ_93	196	-33.59	20	95	95		DUSP3	200	-37.33	19	100	100		0.730297	0.0254636
mmu-miR-706		circ_93	196	-33.59	20	95	95		NAV1	192	-30.96	19	94.74	94.74		0.803326	0.00911066
mmu-miR-706		circ_93	196	-33.59	20	95	95		SYT12	188	-31.73	20	90	90		0.858099	0.00307611
mmu-miR-706		circ_93	196	-33.59	20	95	95		CTNNAL1	200	-37.3	19	100	100		0.839841	0.00461137
mmu-miR-706		circ_93	196	-33.59	20	95	95		WDR12	196	-36.55	19	94.74	100		0.894614	0.00112701
mmu-miR-706		circ_93	196	-33.59	20	95	95		PML	196	-32.13	20	95	95		0.803326	0.00911066
mmu-miR-706		circ_93	196	-33.59	20	95	95		TOP1	196	-33.62	20	95	95		0.803326	0.00911066
mmu-miR-706		circ_93	196	-33.59	20	95	95		ATIC	188	-30.23	20	90	90		0.785069	0.0121946
mmu-miR-706		circ_93	196	-33.59	20	95	95		ZCCHC4	196	-32.13	20	95	95		0.839841	0.00461137
mmu-miR-706		circ_93	196	-33.59	20	95	95		CCL9	196	-33.62	20	95	95		0.894614	0.00112701
mmu-miR-706		circ_93	196	-33.59	20	95	95		DOHH	188	-30.23	20	90	90		0.785069	0.0121946
mmu-miR-706		circ_93	196	-33.59	20	95	95		CIAPIN1	196	-33.62	20	95	95		0.858099	0.00307611
mmu-miR-706		circ_93	196	-33.59	20	95	95		BRCC3	192	-31.24	21	90.48	90.48		0.803326	0.00911066
mmu-miR-706		circ_93	196	-33.59	20	95	95		FNIP2	196	-34.39	20	95	95		0.803326	0.00911066
mmu-miR-706		circ_1492	196	-33.59	20	95	95		CHD9	200	-36.3	19	100	100		0.748554	0.0203173
mmu-miR-706		circ_1492	196	-33.59	20	95	95		TRIOBP	200	-36.3	19	100	100		0.803326	0.00911066
mmu-miR-706		circ_1492	196	-33.59	20	95	95		KNOP1	196	-33.59	20	95	95		0.803326	0.00911066
mmu-miR-706		circ_1492	196	-33.59	20	95	95		STOM	200	-36.3	19	100	100		0.912871	0.000589839
mmu-miR-706		circ_1492	196	-33.59	20	95	95		TMED5	196	-32.83	20	95	95		0.912871	0.000589839
mmu-miR-706		circ_1492	196	-33.59	20	95	95		DUSP3	200	-37.33	19	100	100		0.730297	0.0254636
mmu-miR-706		circ_1492	196	-33.59	20	95	95		NAV1	192	-30.96	19	94.74	94.74		0.803326	0.00911066
mmu-miR-706		circ_1492	196	-33.59	20	95	95		SYT12	188	-31.73	20	90	90		0.858099	0.00307611
mmu-miR-706		circ_1492	196	-33.59	20	95	95		CTNNAL1	200	-37.3	19	100	100		0.839841	0.00461137
mmu-miR-706		circ_1492	196	-33.59	20	95	95		WDR12	196	-36.55	19	94.74	100		0.894614	0.00112701
mmu-miR-706		circ_1492	196	-33.59	20	95	95		PML	196	-32.13	20	95	95		0.803326	0.00911066
mmu-miR-706		circ_1492	196	-33.59	20	95	95		TOP1	196	-33.62	20	95	95		0.803326	0.00911066
mmu-miR-706		circ_1492	196	-33.59	20	95	95		ATIC	188	-30.23	20	90	90		0.785069	0.0121946
mmu-miR-706		circ_1492	196	-33.59	20	95	95		ZCCHC4	196	-32.13	20	95	95		0.839841	0.00461137
mmu-miR-706		circ_1492	196	-33.59	20	95	95		CCL9	196	-33.62	20	95	95		0.894614	0.00112701
mmu-miR-706		circ_1492	196	-33.59	20	95	95		DOHH	188	-30.23	20	90	90		0.785069	0.0121946
mmu-miR-706		circ_1492	196	-33.59	20	95	95		CIAPIN1	196	-33.62	20	95	95		0.858099	0.00307611
mmu-miR-706		circ_1492	196	-33.59	20	95	95		BRCC3	192	-31.24	21	90.48	90.48		0.803326	0.00911066
mmu-miR-706		circ_1492	196	-33.59	20	95	95		FNIP2	196	-34.39	20	95	95		0.803326	0.00911066
mmu-miR-7067-5p		circ_265	167	-31.81	23	73.91	78.26		VASP	172	-33.75	23	73.91	78.26		0.85	0.00607363
mmu-miR-7067-5p		circ_265	167	-31.81	23	73.91	78.26		AMOTL1	161	-30.48	18	72.22	83.33		0.716667	0.0368662
mmu-miR-7067-5p		circ_265	167	-31.81	23	73.91	78.26		DOHH	168	-30.94	23	73.91	73.91		0.883333	0.0030754
mmu-miR-7067-5p		circ_265	167	-31.81	23	73.91	78.26		LONRF3	172	-33.43	22	72.73	81.82		0.766667	0.02139
mmu-miR-7069-3p		circ_2400	166	-33.75	20	75	80		PITPNA	170	-32.12	20	80	80		0.772315	0.0147213
mmu-miR-7069-3p		circ_2400	166	-33.75	20	75	80		PUS1	161	-30.18	22	72.73	77.27		0.752512	0.0193012
mmu-miR-7069-3p		circ_167	169	-38.26	18	83.33	83.33		KLHL2	168	-30.59	18	83.33	83.33		0.894614	0.00112701
mmu-miR-7069-3p		circ_167	169	-38.26	18	83.33	83.33		EMILIN2	162	-31.04	24	70.83	75		0.785069	0.0121946
mmu-miR-7069-3p		circ_167	169	-38.26	18	83.33	83.33		PITPNA	170	-32.12	20	80	80		0.730297	0.0254636
mmu-miR-7069-3p		circ_167	169	-38.26	18	83.33	83.33		DAP	160	-30.5	18	77.78	77.78		0.858099	0.00307611
mmu-miR-7069-3p		circ_167	169	-38.26	18	83.33	83.33		DDX39	167	-32.28	20	75	80		0.912871	0.000589839
mmu-miR-7069-3p		circ_167	169	-38.26	18	83.33	83.33		KLHDC8A	163	-31.23	19	73.68	78.95		0.839841	0.00461137
mmu-miR-7069-3p		circ_167	169	-38.26	18	83.33	83.33		TMED5	162	-36.49	24	70.83	75		0.912871	0.000589839
mmu-miR-7069-3p		circ_167	169	-38.26	18	83.33	83.33		PUS1	161	-30.18	22	72.73	77.27		0.803326	0.00911066
mmu-miR-7069-5p		circ_1097	173	-32.98	22	72.73	81.82		HHIP	168	-31.72	21	76.19	76.19		0.864531	0.00263237
mmu-miR-7069-5p		circ_1097	173	-32.98	22	72.73	81.82		OASL1	166	-32.97	19	73.68	84.21		0.779773	0.0132052
mmu-miR-7069-5p		circ_1097	173	-32.98	22	72.73	81.82		EPHA2	166	-31.7	21	76.19	76.19		0.74587	0.0210263
mmu-miR-7069-5p		circ_1097	173	-32.98	22	72.73	81.82		PTPRG	171	-31.96	20	80	80		0.762821	0.016814
mmu-miR-7069-5p		circ_1097	173	-32.98	22	72.73	81.82		CENPA	178	-34.34	19	84.21	89.47		0.796725	0.0101563
mmu-miR-7069-5p		circ_1097	173	-32.98	22	72.73	81.82		SPRY4	177	-36.64	23	78.26	78.26		0.762821	0.016814
mmu-miR-7069-5p		circ_1097	173	-32.98	22	72.73	81.82		FGD6	180	-36.44	19	84.21	89.47		0.864531	0.00263237
mmu-miR-7069-5p		circ_1097	173	-32.98	22	72.73	81.82		FOXS1	167	-34.09	23	73.91	73.91		0.711967	0.0314253
mmu-miR-7069-5p		circ_2313	169	-32.45	22	72.73	77.27		HHIP	168	-31.72	21	76.19	76.19		0.796725	0.0101563
mmu-miR-7069-5p		circ_2313	169	-32.45	22	72.73	77.27		TIMP4	175	-30.3	20	80	85		0.898434	0.000994195
mmu-miR-7069-5p		circ_2313	169	-32.45	22	72.73	77.27		OASL1	166	-32.97	19	73.68	84.21		0.847579	0.00390855
mmu-miR-7069-5p		circ_2313	169	-32.45	22	72.73	77.27		EPHA2	166	-31.7	21	76.19	76.19		0.830628	0.00555542
mmu-miR-7069-5p		circ_2313	169	-32.45	22	72.73	77.27		PTPRG	171	-31.96	20	80	80		0.830628	0.00555542
mmu-miR-7069-5p		circ_2313	169	-32.45	22	72.73	77.27		CENPA	178	-34.34	19	84.21	89.47		0.728918	0.0258836
mmu-miR-7069-5p		circ_2313	169	-32.45	22	72.73	77.27		SLC43A2	174	-33.82	19	78.95	89.47		0.796725	0.0101563
mmu-miR-7069-5p		circ_2313	169	-32.45	22	72.73	77.27		LOXL3	169	-30.21	21	76.19	76.19		0.813676	0.00762197
mmu-miR-7069-5p		circ_2313	169	-32.45	22	72.73	77.27		UBXN2B	169	-33.53	22	72.73	77.27		0.762821	0.016814
mmu-miR-7069-5p		circ_2313	169	-32.45	22	72.73	77.27		MTHFD2L	171	-30.95	21	76.19	80.95		0.847579	0.00390855
mmu-miR-7069-5p		circ_2313	169	-32.45	22	72.73	77.27		MAFF	176	-34.84	19	78.95	89.47		0.813676	0.00762197
mmu-miR-7069-5p		circ_2313	169	-32.45	22	72.73	77.27		SPRY4	177	-36.64	23	78.26	78.26		0.830628	0.00555542
mmu-miR-7069-5p		circ_2313	169	-32.45	22	72.73	77.27		FGD6	180	-36.44	19	84.21	89.47		0.796725	0.0101563
mmu-miR-7069-5p		circ_2313	169	-32.45	22	72.73	77.27		FOXS1	167	-34.09	23	73.91	73.91		0.728918	0.0258836
mmu-miR-7069-5p		circ_2313	169	-32.45	22	72.73	77.27		LIMK1	172	-31.23	21	76.19	80.95		0.847579	0.00390855
mmu-miR-7069-5p		circ_1983	172	-32.81	22	77.27	77.27		HHIP	168	-31.72	21	76.19	76.19		0.8	0.0138283
mmu-miR-7069-5p		circ_1983	172	-32.81	22	77.27	77.27		TIMP4	175	-30.3	20	80	85		0.716667	0.0368662
mmu-miR-7069-5p		circ_1983	172	-32.81	22	77.27	77.27		OASL1	166	-32.97	19	73.68	84.21		0.85	0.00607363
mmu-miR-7069-5p		circ_1983	172	-32.81	22	77.27	77.27		EPHA2	166	-31.7	21	76.19	76.19		0.816667	0.0107694
mmu-miR-7069-5p		circ_1983	172	-32.81	22	77.27	77.27		PTPRG	171	-31.96	20	80	80		0.766667	0.02139
mmu-miR-7069-5p		circ_1983	172	-32.81	22	77.27	77.27		LOXL3	169	-30.21	21	76.19	76.19		0.8	0.0138283
mmu-miR-7069-5p		circ_1983	172	-32.81	22	77.27	77.27		UBXN2B	169	-33.53	22	72.73	77.27		0.75	0.0254905
mmu-miR-7069-5p		circ_1983	172	-32.81	22	77.27	77.27		MTHFD2L	171	-30.95	21	76.19	80.95		0.883333	0.0030754
mmu-miR-7069-5p		circ_1983	172	-32.81	22	77.27	77.27		MAFF	176	-34.84	19	78.95	89.47		0.816667	0.0107694
mmu-miR-7069-5p		circ_1983	172	-32.81	22	77.27	77.27		SPRY4	177	-36.64	23	78.26	78.26		0.766667	0.02139
mmu-miR-7069-5p		circ_1983	172	-32.81	22	77.27	77.27		FGD6	180	-36.44	19	84.21	89.47		0.8	0.0138283
mmu-miR-7069-5p		circ_1983	172	-32.81	22	77.27	77.27		FOXS1	167	-34.09	23	73.91	73.91		0.8	0.0138283
mmu-miR-7069-5p		circ_1983	172	-32.81	22	77.27	77.27		LIMK1	172	-31.23	21	76.19	80.95		0.766667	0.02139
mmu-miR-7072-5p		circ_1078	172	-31.27	20	80	80		PKD2	171	-32.63	20	80	80		0.821584	0.00660266
mmu-miR-7072-5p		circ_1078	172	-31.27	20	80	80		BCL2L1	164	-30.47	19	73.68	78.95		0.821584	0.00660266
mmu-miR-7072-5p		circ_1078	172	-31.27	20	80	80		FRMD4A	172	-33.11	20	75	85		0.858099	0.00307611
mmu-miR-7072-5p		circ_1078	172	-31.27	20	80	80		CAMKK2	171	-31.66	20	80	80		0.821584	0.00660266
mmu-miR-7072-5p		circ_1078	172	-31.27	20	80	80		2019-09-09	164	-31.56	24	70.83	70.83		0.858099	0.00307611
mmu-miR-7072-5p		circ_1078	172	-31.27	20	80	80		TMEM198B	166	-30.22	21	76.19	76.19		0.766812	0.0159118
mmu-miR-7081-5p		circ_3118	177	-37.93	22	72.73	86.36		NRP2	171	-31.67	27	70.37	70.37		0.703005	0.0346443
mmu-miR-7081-5p		circ_3118	177	-37.93	22	72.73	86.36		TRMT61A	163	-30.61	20	70	80		0.772315	0.0147213
mmu-miR-7087-3p		circ_3324	171	-31.44	24	75	75		DCBLD2	174	-32.59	21	80.95	80.95		0.703005	0.0346443
mmu-miR-7088-5p		circ_167	187	-37.12	23	78.26	86.96		FGFR1	177	-30.87	24	75	79.17		0.803326	0.00911066
mmu-miR-7088-5p		circ_167	187	-37.12	23	78.26	86.96		PHC2	177	-33.14	22	77.27	81.82		0.803326	0.00911066
mmu-miR-7088-5p		circ_167	187	-37.12	23	78.26	86.96		MBNL3	176	-31.68	23	73.91	82.61		0.839841	0.00461137
mmu-miR-7094-1-5p		circ_1983	181	-30.25	22	77.27	86.36		RAI14	192	-33.14	21	90.48	90.48		0.783333	0.0172233
mmu-miR-711		circ_2313	176	-31.12	22	72.73	86.36		RCL1	163	-30.4	20	70	80		0.847579	0.00390855
mmu-miR-711		circ_2313	176	-31.12	22	72.73	86.36		WNK4	172	-36.19	21	71.43	85.71		0.74587	0.0210263
mmu-miR-711		circ_2313	176	-31.12	22	72.73	86.36		SLC43A2	168	-32.43	25	72	72		0.796725	0.0101563
mmu-miR-7578		circ_2411	184	-37.79	20	85	90		LRRC32	165	-30.54	20	70	80		0.762821	0.016814
mmu-miR-763		circ_167	167	-32.97	19	78.95	78.95		GIMAP5	162	-33.97	19	73.68	78.95		0.872768	0.00213129
mmu-miR-763		circ_167	167	-32.97	19	78.95	78.95		LPIN3	162	-30.76	20	75	75		0.730297	0.0254636
mmu-miR-763		circ_167	167	-32.97	19	78.95	78.95		MRVI1	168	-30.35	25	72	72		0.803326	0.00911066
mmu-miR-763		circ_167	167	-32.97	19	78.95	78.95		ITGA3	166	-31.51	19	78.95	78.95		0.748554	0.0203173
mmu-miR-7662-3p		circ_946	177	-33.65	22	77.27	81.82		SLC20A1	165	-30.31	22	72.73	72.73		0.894614	0.00112701
mmu-miR-7662-3p		circ_946	177	-33.65	22	77.27	81.82		SPON1	170	-33.77	19	78.95	84.21		0.839841	0.00461137
mmu-miR-7662-3p		circ_946	177	-33.65	22	77.27	81.82		CLDN15	166	-32.02	20	75	80		0.748554	0.0203173
mmu-miR-7662-3p		circ_946	177	-33.65	22	77.27	81.82		FEZ1	169	-31.58	21	76.19	76.19		0.748554	0.0203173
mmu-miR-7665-5p		circ_1426	164	-32.12	20	70	80		ALPL	173	-30.27	26	73.08	73.08		0.785069	0.0121946
mmu-miR-7665-5p		circ_1426	164	-32.12	20	70	80		F8	168	-30.33	20	75	80		0.785069	0.0121946
mmu-miR-7667-5p		circ_93	192	-43.6	19	89.47	100		EXOSC2	180	-35.55	20	80	90		0.839841	0.00461137
mmu-miR-7667-5p		circ_93	192	-43.6	19	89.47	100		EPS8	179	-30.55	21	80.95	85.71		0.839841	0.00461137
mmu-miR-7667-5p		circ_93	192	-43.6	19	89.47	100		TM4SF1	192	-38.11	21	90.48	90.48		0.894614	0.00112701
mmu-miR-7667-5p		circ_93	192	-43.6	19	89.47	100		CCBE1	180	-32.66	20	85	85		0.803326	0.00911066
mmu-miR-7667-5p		circ_93	192	-43.6	19	89.47	100		GAS7	175	-30.52	18	83.33	88.89		0.803326	0.00911066
mmu-miR-7667-5p		circ_93	192	-43.6	19	89.47	100		APOBEC1	192	-43.86	19	89.47	100		0.894614	0.00112701
mmu-miR-7667-5p		circ_93	192	-43.6	19	89.47	100		CCNB1	180	-35.54	20	80	90		0.912871	0.000589839
mmu-miR-7667-5p		circ_93	192	-43.6	19	89.47	100		PKD2	192	-41.14	20	90	95		0.839841	0.00461137
mmu-miR-7667-5p		circ_93	192	-43.6	19	89.47	100		WDR12	192	-43.6	19	89.47	100		0.894614	0.00112701
mmu-miR-7667-5p		circ_93	192	-43.6	19	89.47	100		FGFR1	192	-43.87	19	89.47	100		0.803326	0.00911066
mmu-miR-7667-5p		circ_93	192	-43.6	19	89.47	100		DHCR7	180	-33.11	19	84.21	89.47		0.785069	0.0121946
mmu-miR-7667-5p		circ_93	192	-43.6	19	89.47	100		NID1	175	-33.03	19	78.95	89.47		0.712039	0.0314
mmu-miR-7667-5p		circ_93	192	-43.6	19	89.47	100		CAMKK2	192	-47.78	19	89.47	100		0.839841	0.00461137
mmu-miR-7667-5p		circ_93	192	-43.6	19	89.47	100		SLFN2	175	-30.68	22	77.27	81.82		0.894614	0.00112701
mmu-miR-7667-5p		circ_93	192	-43.6	19	89.47	100		KLHL2	192	-45.47	19	89.47	100		0.894614	0.00112701
mmu-miR-7667-5p		circ_93	192	-43.6	19	89.47	100		SLC22A15	192	-42.25	20	90	95		0.858099	0.00307611
mmu-miR-7667-5p		circ_780	183	-37.8	18	88.89	94.44		EXOSC2	180	-35.55	20	80	90		0.748554	0.0203173
mmu-miR-7667-5p		circ_780	183	-37.8	18	88.89	94.44		CLDN15	188	-43.79	20	85	95		0.894614	0.00112701
mmu-miR-7667-5p		circ_780	183	-37.8	18	88.89	94.44		EPS8	179	-30.55	21	80.95	85.71		0.748554	0.0203173
mmu-miR-7667-5p		circ_780	183	-37.8	18	88.89	94.44		TM4SF1	192	-38.11	21	90.48	90.48		0.858099	0.00307611
mmu-miR-7667-5p		circ_780	183	-37.8	18	88.89	94.44		CCBE1	180	-32.66	20	85	85		0.785069	0.0121946
mmu-miR-7667-5p		circ_780	183	-37.8	18	88.89	94.44		GAS7	175	-30.52	18	83.33	88.89		0.785069	0.0121946
mmu-miR-7667-5p		circ_780	183	-37.8	18	88.89	94.44		APOBEC1	192	-43.86	19	89.47	100		0.803326	0.00911066
mmu-miR-7667-5p		circ_780	183	-37.8	18	88.89	94.44		CCNB1	180	-35.54	20	80	90		0.785069	0.0121946
mmu-miR-7667-5p		circ_780	183	-37.8	18	88.89	94.44		PKD2	192	-41.14	20	90	95		0.803326	0.00911066
mmu-miR-7667-5p		circ_780	183	-37.8	18	88.89	94.44		WDR12	192	-43.6	19	89.47	100		0.803326	0.00911066
mmu-miR-7667-5p		circ_780	183	-37.8	18	88.89	94.44		FGFR1	192	-43.87	19	89.47	100		0.785069	0.0121946
mmu-miR-7667-5p		circ_780	183	-37.8	18	88.89	94.44		DHCR7	180	-33.11	19	84.21	89.47		0.748554	0.0203173
mmu-miR-7667-5p		circ_780	183	-37.8	18	88.89	94.44		NID1	175	-33.03	19	78.95	89.47		0.712039	0.0314
mmu-miR-7667-5p		circ_780	183	-37.8	18	88.89	94.44		CAMKK2	192	-47.78	19	89.47	100		0.803326	0.00911066
mmu-miR-7667-5p		circ_780	183	-37.8	18	88.89	94.44		SLFN2	175	-30.68	22	77.27	81.82		0.803326	0.00911066
mmu-miR-7667-5p		circ_780	183	-37.8	18	88.89	94.44		KLHL2	192	-45.47	19	89.47	100		0.803326	0.00911066
mmu-miR-7667-5p		circ_780	183	-37.8	18	88.89	94.44		SLC22A15	192	-42.25	20	90	95		0.785069	0.0121946
mmu-miR-7667-5p		circ_167	176	-30.81	19	78.95	89.47		EXOSC2	180	-35.55	20	80	90		0.839841	0.00461137
mmu-miR-7667-5p		circ_167	176	-30.81	19	78.95	89.47		EPS8	179	-30.55	21	80.95	85.71		0.839841	0.00461137
mmu-miR-7667-5p		circ_167	176	-30.81	19	78.95	89.47		TM4SF1	192	-38.11	21	90.48	90.48		0.894614	0.00112701
mmu-miR-7667-5p		circ_167	176	-30.81	19	78.95	89.47		CCBE1	180	-32.66	20	85	85		0.803326	0.00911066
mmu-miR-7667-5p		circ_167	176	-30.81	19	78.95	89.47		GAS7	175	-30.52	18	83.33	88.89		0.803326	0.00911066
mmu-miR-7667-5p		circ_167	176	-30.81	19	78.95	89.47		APOBEC1	192	-43.86	19	89.47	100		0.894614	0.00112701
mmu-miR-7667-5p		circ_167	176	-30.81	19	78.95	89.47		CCNB1	180	-35.54	20	80	90		0.912871	0.000589839
mmu-miR-7667-5p		circ_167	176	-30.81	19	78.95	89.47		PKD2	192	-41.14	20	90	95		0.839841	0.00461137
mmu-miR-7667-5p		circ_167	176	-30.81	19	78.95	89.47		WDR12	192	-43.6	19	89.47	100		0.894614	0.00112701
mmu-miR-7667-5p		circ_167	176	-30.81	19	78.95	89.47		FGFR1	192	-43.87	19	89.47	100		0.803326	0.00911066
mmu-miR-7667-5p		circ_167	176	-30.81	19	78.95	89.47		DHCR7	180	-33.11	19	84.21	89.47		0.785069	0.0121946
mmu-miR-7667-5p		circ_167	176	-30.81	19	78.95	89.47		NID1	175	-33.03	19	78.95	89.47		0.712039	0.0314
mmu-miR-7667-5p		circ_167	176	-30.81	19	78.95	89.47		CAMKK2	192	-47.78	19	89.47	100		0.839841	0.00461137
mmu-miR-7667-5p		circ_167	176	-30.81	19	78.95	89.47		SLFN2	175	-30.68	22	77.27	81.82		0.894614	0.00112701
mmu-miR-7667-5p		circ_167	176	-30.81	19	78.95	89.47		KLHL2	192	-45.47	19	89.47	100		0.894614	0.00112701
mmu-miR-7667-5p		circ_167	176	-30.81	19	78.95	89.47		SLC22A15	192	-42.25	20	90	95		0.858099	0.00307611
mmu-miR-7667-5p		circ_265	175	-30.58	18	83.33	88.89		EXOSC2	180	-35.55	20	80	90		0.833333	0.0082672
mmu-miR-7667-5p		circ_265	175	-30.58	18	83.33	88.89		CLDN15	188	-43.79	20	85	95		0.833333	0.0082672
mmu-miR-7667-5p		circ_265	175	-30.58	18	83.33	88.89		EPS8	179	-30.55	21	80.95	85.71		0.733333	0.0311232
mmu-miR-7667-5p		circ_265	175	-30.58	18	83.33	88.89		TM4SF1	192	-38.11	21	90.48	90.48		0.866667	0.00450838
mmu-miR-7667-5p		circ_265	175	-30.58	18	83.33	88.89		APOBEC1	192	-43.86	19	89.47	100		0.733333	0.0311232
mmu-miR-7667-5p		circ_265	175	-30.58	18	83.33	88.89		CCNB1	180	-35.54	20	80	90		0.833333	0.0082672
mmu-miR-7667-5p		circ_265	175	-30.58	18	83.33	88.89		PKD2	192	-41.14	20	90	95		0.783333	0.0172233
mmu-miR-7667-5p		circ_265	175	-30.58	18	83.33	88.89		WDR12	192	-43.6	19	89.47	100		0.916667	0.00131173
mmu-miR-7667-5p		circ_265	175	-30.58	18	83.33	88.89		DHCR7	180	-33.11	19	84.21	89.47		0.8	0.0138283
mmu-miR-7667-5p		circ_265	175	-30.58	18	83.33	88.89		CAMKK2	192	-47.78	19	89.47	100		0.783333	0.0172233
mmu-miR-7667-5p		circ_265	175	-30.58	18	83.33	88.89		SLFN2	175	-30.68	22	77.27	81.82		0.833333	0.0082672
mmu-miR-7667-5p		circ_265	175	-30.58	18	83.33	88.89		KLHL2	192	-45.47	19	89.47	100		0.8	0.0138283
mmu-miR-7667-5p		circ_265	175	-30.58	18	83.33	88.89		SLC22A15	192	-42.25	20	90	95		0.783333	0.0172233
mmu-miR-7667-5p		circ_3118	174	-30.52	19	84.21	84.21		CLDN15	188	-43.79	20	85	95		0.841625	0.00444222
mmu-miR-7667-5p		circ_3118	174	-30.52	19	84.21	84.21		TM4SF1	192	-38.11	21	90.48	90.48		0.703005	0.0346443
mmu-miR-7669-3p		circ_780	185	-41.67	20	85	90		HECTD1	175	-34.7	21	76.19	85.71		0.748554	0.0203173
mmu-miR-7669-3p		circ_780	185	-41.67	20	85	90		SLC43A2	168	-31.87	24	70.83	75		0.858099	0.00307611
mmu-miR-7669-3p		circ_780	185	-41.67	20	85	90		IMP4	175	-36.98	21	80.95	80.95		0.803326	0.00911066
mmu-miR-7669-3p		circ_780	185	-41.67	20	85	90		MOB3A	180	-33.91	21	80.95	85.71		0.730297	0.0254636
mmu-miR-7669-3p		circ_780	185	-41.67	20	85	90		UTP18	192	-43.72	20	90	95		0.912871	0.000589839
mmu-miR-7669-3p		circ_779	176	-33.85	20	80	85		HECTD1	175	-34.7	21	76.19	85.71		0.839841	0.00461137
mmu-miR-7669-3p		circ_779	176	-33.85	20	80	85		SLC43A2	168	-31.87	24	70.83	75		0.785069	0.0121946
mmu-miR-7669-3p		circ_779	176	-33.85	20	80	85		IMP4	175	-36.98	21	80.95	80.95		0.839841	0.00461137
mmu-miR-7669-3p		circ_779	176	-33.85	20	80	85		MOB3A	180	-33.91	21	80.95	85.71		0.858099	0.00307611
mmu-miR-7669-3p		circ_779	176	-33.85	20	80	85		AUTS2	164	-30.69	21	71.43	76.19		0.730297	0.0254636
mmu-miR-7669-3p		circ_779	176	-33.85	20	80	85		UTP18	192	-43.72	20	90	95		0.785069	0.0121946
mmu-miR-7669-3p		circ_2411	166	-31.64	20	75	80		HECTD1	175	-34.7	21	76.19	85.71		0.881483	0.00167742
mmu-miR-7669-3p		circ_2411	166	-31.64	20	75	80		SLC43A2	168	-31.87	24	70.83	75		0.813676	0.00762197
mmu-miR-7669-3p		circ_2411	166	-31.64	20	75	80		IMP4	175	-36.98	21	80.95	80.95		0.813676	0.00762197
mmu-miR-7669-3p		circ_2411	166	-31.64	20	75	80		MOB3A	180	-33.91	21	80.95	85.71		0.915386	0.000533717
mmu-miR-7669-3p		circ_2411	166	-31.64	20	75	80		AUTS2	164	-30.69	21	71.43	76.19		0.711967	0.0314253
mmu-miR-7669-3p		circ_2411	166	-31.64	20	75	80		UTP18	192	-43.72	20	90	95		0.74587	0.0210263
mmu-miR-7671-5p		circ_1078	169	-30.94	22	72.73	77.27		TNFAIP2	173	-33.26	21	71.43	85.71		0.766812	0.0159118
mmu-miR-7671-5p		circ_1078	169	-30.94	22	72.73	77.27		SLC29A1	172	-33	20	70	90		0.730297	0.0254636
mmu-miR-7671-5p		circ_1078	169	-30.94	22	72.73	77.27		WWP1	168	-32.79	24	70.83	79.17		0.730297	0.0254636
mmu-miR-8119		circ_1078	166	-31.87	21	71.43	80.95		GRASP	162	-30.21	18	77.78	77.78		0.748554	0.0203173
mmu-miR-8119		circ_1078	166	-31.87	21	71.43	80.95		BCL2L1	170	-30.74	20	75	85		0.821584	0.00660266
mmu-miR-8119		circ_1078	166	-31.87	21	71.43	80.95		DHRS9	169	-31.71	19	78.95	84.21		0.748554	0.0203173
mmu-miR-8119		circ_1078	166	-31.87	21	71.43	80.95		AMPD3	173	-33.75	18	83.33	88.89		0.858099	0.00307611
mmu-miR-8119		circ_1078	166	-31.87	21	71.43	80.95		AMPD2	166	-30.52	19	73.68	84.21		0.858099	0.00307611
mmu-miR-8119		circ_1078	166	-31.87	21	71.43	80.95		HIPK1	166	-31.27	18	77.78	83.33		0.858099	0.00307611
mmu-miR-8119		circ_1078	166	-31.87	21	71.43	80.95		HMGA2	174	-31.63	18	83.33	88.89		0.858099	0.00307611
mmu-miR-8119		circ_1078	166	-31.87	21	71.43	80.95		WNK4	165	-30.87	19	78.95	78.95		0.748554	0.0203173
mmu-miR-8119		circ_2313	170	-34.9	20	75	85		GRASP	162	-30.21	18	77.78	77.78		0.864531	0.00263237
mmu-miR-8119		circ_2313	170	-34.9	20	75	85		BCL2L1	170	-30.74	20	75	85		0.762821	0.016814
mmu-miR-8119		circ_2313	170	-34.9	20	75	85		DHRS9	169	-31.71	19	78.95	84.21		0.881483	0.00167742
mmu-miR-8119		circ_2313	170	-34.9	20	75	85		TRIOBP	166	-32.38	18	77.78	83.33		0.762821	0.016814
mmu-miR-8119		circ_2313	170	-34.9	20	75	85		AMPD3	173	-33.75	18	83.33	88.89		0.830628	0.00555542
mmu-miR-8119		circ_2313	170	-34.9	20	75	85		AMPD2	166	-30.52	19	73.68	84.21		0.762821	0.016814
mmu-miR-8119		circ_2313	170	-34.9	20	75	85		HIPK1	166	-31.27	18	77.78	83.33		0.830628	0.00555542
mmu-miR-8119		circ_2313	170	-34.9	20	75	85		HMGA2	174	-31.63	18	83.33	88.89		0.830628	0.00555542
mmu-miR-8119		circ_2313	170	-34.9	20	75	85		WNK4	165	-30.87	19	78.95	78.95		0.74587	0.0210263
mmu-miR-8119		circ_2313	170	-34.9	20	75	85		LYAR	170	-30.36	19	78.95	84.21		0.847579	0.00390855
mmu-miR-9768-5p		circ_1426	173	-34.38	20	80	80		FEZ1	175	-31.17	19	84.21	84.21		0.839841	0.00461137
mmu-miR-9768-5p		circ_1426	173	-34.38	20	80	80		TMEM167	165	-30.12	24	70.83	70.83		0.803326	0.00911066
mmu-miR-9768-5p		circ_1426	173	-34.38	20	80	80		MYO18A	171	-31.38	21	76.19	80.95		0.839841	0.00461137
1Custom circRNA ID in this study.
2Score, Energe, Aligned length, Ratio were derived from miRanda.
3P value and r were derived from spearman correlation test.
